# Supplementary material for: The First Insight into the Tissue Specific Taxus Transcriptome via Illumina Second Generation Sequencing
Source: PLoS One. 2011 Jun 22;6(6):e21220. doi: 10.1371/journal.pone.0021220 (PMC3120849; doi:10.1371/journal.pone.0021220)
Supplement: Table S1 — Annotation of 36,493 Unigenes assembled from 13,737,528 Illumina sequence reads. (XLS) [file pone.0021220.s001.xls]

## Sheet: all
Table S1 Annotation of 36493 Unigenes assembled from 13,737,528 Illumina sequence reads
geneID	geneLength	Taxus_rawreads(11567686)	Taxus_RPKM	Nr-ID	Nr-Score	Nr-Evalue	Nr-annotation	Swissprot-ID	Swissprot-Score	Swissprot-Evalue
Unigene10000_Taxus	247	8	2.7999	gi|115479757|ref|NP_001063472.1|	55.5	3e-07	Os09g0478500 [Oryza sativa (japonica cultivar-group)] >gi|113631705|dbj|BAF25386.1| Os09g0478500 [Oryza sativa Japonica Group]	Q0DCT8	55.1	1e-07
Unigene10001_Taxus	344	23	5.7799	--	--	--	--	--	--	--
Unigene10002_Taxus	1316	238	15.6342	--	--	--	--	--	--	--
Unigene10003_Taxus	756	43	4.917	gi|115485225|ref|NP_001067756.1|	100	4e-20	Os11g0310800 [Oryza sativa (japonica cultivar-group)]	P15938	57.4	1e-07
Unigene10004_Taxus	413	51	10.6751	--	--	--	--	--	--	--
Unigene10005_Taxus	733	370	43.6366	gi|115454199|ref|NP_001050700.1|	67.4	3e-10	Os03g0626200 [Oryza sativa (japonica cultivar-group)]	Q9XIA7	57.8	7e-08
Unigene10006_Taxus	259	18	6.0079	--	--	--	--	--	--	--
Unigene10007_Taxus	245	6	2.1171	--	--	--	--	--	--	--
Unigene10008_Taxus	334	18	4.6589	--	--	--	--	--	--	--
Unigene10009_Taxus	1208	155	11.0922	gi|184186927|gb|ACC66092.1|	214	2e-75	anthocyanidin synthase [Ginkgo biloba] >gi|184186928|gb|ACC66093.1| anthocyanidin synthase [Ginkgo biloba]	P51091	195	8e-66
Unigene1000_Taxus	304	22	6.2561	--	--	--	--	--	--	--
Unigene10010_Taxus	264	9	2.9471	gi|20161229|dbj|BAB90156.1|	82	3e-15	selenium-binding protein-like [Oryza sativa Japonica Group] >gi|255673935|dbj|BAH91411.1| Os01g0884800 [Oryza sativa Japonica Group]	Q9SN39	79	9e-15
Unigene10011_Taxus	1886	256	11.7342	gi|115452951|ref|NP_001050076.1|	338	3e-91	Os03g0343300 [Oryza sativa (japonica cultivar-group)] >gi|108708082|gb|ABF95877.1| Utp14 protein, expressed [Oryza sativa (japonica cultivar-group)]	P87137	164	2e-39
Unigene10012_Taxus	377	35	8.0256	gi|28140043|gb|AAO26312.1|	135	9e-48	receptor-like protein kinase [Elaeis guineensis]	Q9FL28	66.6	1e-18
Unigene10013_Taxus	259	9	3.004	gi|30409136|emb|CAD89802.1|	117	9e-26	histidine amino acid transporter [Oryza sativa (indica cultivar-group)]	--	--	--
Unigene10014_Taxus	231	22	8.2331	gi|87240796|gb|ABD32654.1|	85.1	4e-16	Zinc finger, RING-type [Medicago truncatula]	--	--	--
Unigene10015_Taxus	2300	501	18.8306	gi|115447357|ref|NP_001047458.1|	159	3e-37	Os02g0621100 [Oryza sativa (japonica cultivar-group)] >gi|113536989|dbj|BAF09372.1| Os02g0621100 [Oryza sativa Japonica Group]	Q9FNC7	135	1e-30
Unigene10016_Taxus	247	2	0.7	--	--	--	--	--	--	--
Unigene10017_Taxus	218	12	4.7586	--	--	--	--	--	--	--
Unigene10018_Taxus	848	128	13.0487	gi|30683535|ref|NP_196685.2|	274	1e-72	transducin family protein / WD-40 repeat family protein [Arabidopsis thaliana] >gi|209414540|gb|ACI46510.1| At5g11240 [Arabidopsis thaliana]	Q6ZQL4	98.6	5e-20
Unigene10019_Taxus	223	5	1.9383	--	--	--	--	--	--	--
Unigene1001_Taxus	479	143	25.808	--	--	--	--	--	--	--
Unigene10020_Taxus	267	139	45.0046	gi|115478062|ref|NP_001062626.1|	73.2	1e-12	Os09g0132200 [Oryza sativa (japonica cultivar-group)] >gi|113630859|dbj|BAF24540.1| Os09g0132200 [Oryza sativa Japonica Group]	Q67ZI9	72.8	6e-13
Unigene10021_Taxus	364	12	2.8499	--	--	--	--	--	--	--
Unigene10022_Taxus	219	15	5.9211	--	--	--	--	--	--	--
Unigene10023_Taxus	1821	367	17.4225	gi|585564|sp|P38500.1|NIR_BETVE	822	0	RecName: Full=Ferredoxin--nitrite reductase, chloroplastic; Flags: Precursor >gi|17927|emb|CAA42690.1| ferredoxin--nitrite reductase [Betula pendula]	P38500	822	0
Unigene10024_Taxus	604	44	6.2975	gi|240254326|ref|NP_176885.7|	175	5e-43	SWEETIE (SWEETIE); binding [Arabidopsis thaliana]	Q8JFV4	74.7	4e-13
Unigene10025_Taxus	898	521	50.1551	gi|115452547|ref|NP_001049874.1|	96.3	8e-19	Os03g0303100 [Oryza sativa (japonica cultivar-group)] >gi|108707708|gb|ABF95503.1| expressed protein [Oryza sativa (japonica cultivar-group)] >gi|113548345|dbj|BAF11788.1| Os03g0303100 [Oryza sativa Japonica Group]	--	--	--
Unigene10026_Taxus	269	7	2.2496	gi|115469378|ref|NP_001058288.1|	58.9	3e-08	Os06g0663100 [Oryza sativa (japonica cultivar-group)]	--	--	--
Unigene10027_Taxus	508	33	5.6157	gi|4235644|gb|AAD13304.1|	135	4e-31	polyprotein [Solanum lycopersicum]	--	--	--
Unigene10028_Taxus	224	7	2.7015	--	--	--	--	--	--	--
Unigene10029_Taxus	877	160	15.7715	gi|115475359|ref|NP_001061276.1|	112	1e-23	Os08g0224300 [Oryza sativa (japonica cultivar-group)]	Q1ACJ1	76.6	2e-13
Unigene1002_Taxus	621	29	4.037	gi|255678787|dbj|BAF24802.2|	101	1e-20	Os09g0327200 [Oryza sativa Japonica Group]	Q7Y211	94	7e-19
Unigene10030_Taxus	650	200	26.5993	gi|168002321|ref|XP_001753862.1|	95.9	6e-19	predicted protein [Physcomitrella patens subsp. patens] >gi|162694838|gb|EDQ81184.1| predicted protein [Physcomitrella patens subsp. patens]	--	--	--
Unigene10031_Taxus	229	12	4.53	--	--	--	--	--	--	--
Unigene10032_Taxus	918	291	27.4034	gi|226494151|ref|NP_001149332.1|	147	3e-34	plasma membrane associated protein [Zea mays] >gi|195626458|gb|ACG35059.1| plasma membrane associated protein [Zea mays] >gi|195646108|gb|ACG42522.1| plasma membrane associated protein [Zea mays]	--	--	--
Unigene10033_Taxus	390	22	4.8765	--	--	--	--	--	--	--
Unigene10034_Taxus	829	380	39.6262	gi|5725356|emb|CAA10382.2|	219	4e-56	alpha-D-xylosidase [Tropaeolum majus]	Q9S7Y7	196	2e-49
Unigene10035_Taxus	290	22	6.5581	gi|30682979|ref|NP_566477.2|	97.8	6e-20	ATEXO70D3 (exocyst subunit EXO70 family protein D3); protein binding [Arabidopsis thaliana]	--	--	--
Unigene10036_Taxus	1478	445	26.0279	gi|53830379|gb|AAU95082.1|	295	1e-78	anthocyanidin reductase [Ginkgo biloba]	P51102	260	2e-68
Unigene10037_Taxus	1887	1120	51.3097	gi|79597237|ref|NP_850609.2|	551	1e-155	HDA15; histone deacetylase [Arabidopsis thaliana]	Q8GXJ1	548	1e-155
Unigene10038_Taxus	305	50	14.1718	gi|157101218|dbj|BAF79940.1|	191	5e-48	receptor-like kinase [Marchantia polymorpha]	Q9LK35	187	1e-47
Unigene10039_Taxus	536	695	112.092	gi|114213458|dbj|BAF31132.1|	185	5e-46	catalytic subunit of protein phosphatase 1 [Vicia faba]	P48480	172	8e-43
Unigene1003_Taxus	2683	1049	33.7993	gi|960289|gb|AAA74900.1|	761	0	anthranilate synthase alpha subunit [Ruta graveolens]	P32068	735	0
Unigene10040_Taxus	423	48	9.8097	gi|87240430|gb|ABD32288.1|	122	2e-27	Tetratricopeptide-like helical [Medicago truncatula]	Q3E6Q1	120	3e-27
Unigene10041_Taxus	1323	330	21.5629	gi|58979177|gb|AAW83327.1|	229	1e-58	Cys-rich domain protein [Citrus trifoliata]	--	--	--
Unigene10042_Taxus	811	71	7.5682	gi|167342134|gb|ABZ69015.1|	96.7	5e-19	SET domain-containing protein C [Pinus radiata] >gi|167342136|gb|ABZ69016.1| SET domain-containing protein C [Pinus radiata]	Q9CWR2	61.6	6e-09
Unigene10043_Taxus	250	9	3.1121	--	--	--	--	--	--	--
Unigene10044_Taxus	200	6	2.5934	gi|224054540|ref|XP_002298311.1|	58.2	5e-08	predicted protein [Populus trichocarpa] >gi|222845569|gb|EEE83116.1| predicted protein [Populus trichocarpa]	--	--	--
Unigene10045_Taxus	540	231	36.9804	--	--	--	--	--	--	--
Unigene10046_Taxus	318	88	23.9226	--	--	--	--	--	--	--
Unigene10047_Taxus	603	305	43.7256	--	--	--	--	--	--	--
Unigene10048_Taxus	260	10	3.3249	gi|31433660|gb|AAP55144.1|	72	3e-12	expressed protein [Oryza sativa (japonica cultivar-group)]	--	--	--
Unigene10049_Taxus	2419	506	18.0829	gi|20804657|dbj|BAB92346.1|	459	1e-147	casein kinase I-like [Oryza sativa Japonica Group]	P42158	427	1e-137
Unigene1004_Taxus	244	13	4.6058	gi|115479681|ref|NP_001063434.1|	75.9	2e-13	Os09g0469900 [Oryza sativa (japonica cultivar-group)] >gi|113631667|dbj|BAF25348.1| Os09g0469900 [Oryza sativa Japonica Group]	--	--	--
Unigene10050_Taxus	899	87	8.3659	gi|15236577|ref|NP_194917.1|	174	3e-66	armadillo/beta-catenin repeat family protein [Arabidopsis thaliana] >gi|190341119|gb|ACE74718.1| At4g31890 [Arabidopsis thaliana]	Q681N2	104	8e-27
Unigene10051_Taxus	655	32	4.2234	gi|6633818|gb|AAF19677.1|AC009519_11	105	8e-22	F1N19.17 [Arabidopsis thaliana]	--	--	--
Unigene10052_Taxus	1063	881	71.6467	gi|21554133|gb|AAM63213.1|	127	4e-28	endomembrane-associated protein [Arabidopsis thaliana]	Q0JPA6	109	4e-23
Unigene10053_Taxus	466	36	6.6784	gi|255679691|dbj|BAH95029.1|	79	3e-14	Os11g0105750 [Oryza sativa Japonica Group]	A2APV2	45.4	4e-11
Unigene10054_Taxus	394	77	16.8946	gi|116781386|gb|ABK22077.1|	68.2	5e-11	unknown [Picea sitchensis]	--	--	--
Unigene10055_Taxus	261	15	4.9683	gi|255679102|dbj|BAF25732.2|	82.4	2e-15	Os09g0542000 [Oryza sativa Japonica Group]	--	--	--
Unigene10056_Taxus	245	12	4.2342	--	--	--	--	--	--	--
Unigene10057_Taxus	458	271	51.1514	gi|18423010|ref|NP_568708.1|	68.9	3e-11	hydroxyproline-rich glycoprotein family protein [Arabidopsis thaliana] >gi|21553492|gb|AAM62585.1| extensin like protein [Arabidopsis thaliana] >gi|194708810|gb|ACF88489.1| At5g49280 [Arabidopsis thaliana]	O53426	62.4	1e-09
Unigene10058_Taxus	468	81	14.9621	gi|162460667|ref|NP_001105909.1|	224	4e-58	12-oxo-phytodienoic acid reductase5 [Zea mays] >gi|63021727|gb|AAY26525.1| 12-oxo-phytodienoic acid reductase [Zea mays]	Q9XG54	214	2e-55
Unigene10059_Taxus	265	17	5.5457	--	--	--	--	--	--	--
Unigene1005_Taxus	706	39	4.7754	gi|79501722|ref|NP_195675.2|	111	2e-57	GGT2 (GAMMA-GLUTAMYL TRANSPEPTIDASE 2); gamma-glutamyltransferase/ glutathione gamma-glutamylcysteinyltransferase [Arabidopsis thaliana]	P20735	84.7	2e-28
Unigene10060_Taxus	226	5	1.9126	--	--	--	--	--	--	--
Unigene10061_Taxus	373	24	5.5623	--	--	--	--	--	--	--
Unigene10062_Taxus	1046	44	3.6364	gi|15221470|ref|NP_177036.1|	145	4e-81	ATP binding / protein kinase/ protein serine/threonine kinase [Arabidopsis thaliana] >gi|5734709|gb|AAD49974.1|AC008075_7 Contains PF|00069 Eukaryotic protein kinase domain [Arabidopsis thaliana]	Q3EDL4	93.6	1e-41
Unigene10063_Taxus	1410	422	25.873	gi|115435640|ref|NP_001042578.1|	420	1e-116	Os01g0247500 [Oryza sativa (japonica cultivar-group)] >gi|113532109|dbj|BAF04492.1| Os01g0247500 [Oryza sativa Japonica Group]	Q8L899	249	4e-65
Unigene10064_Taxus	950	222	20.2015	gi|115436272|ref|NP_001042894.1|	191	3e-47	Os01g0323000 [Oryza sativa (japonica cultivar-group)] >gi|12328581|dbj|BAB21240.1| receptor protein kinase PERK1-like protein [Oryza sativa Japonica Group] >gi|113532425|dbj|BAF04808.1| Os01g0323000 [Oryza sativa Japonica Group]	Q3EDL4	169	2e-41
Unigene10065_Taxus	1381	213	13.3334	gi|15238313|ref|NP_201300.1|	115	2e-24	mitochondrial transcription termination factor-related / mTERF-related [Arabidopsis thaliana]	Q96E29	57	3e-07
Unigene10066_Taxus	902	128	12.2675	gi|28555894|emb|CAD45029.1|	123	6e-27	NBS-LRR disease resistance protein homologue [Hordeum vulgare]	P0CB16	73.2	2e-12
Unigene10067_Taxus	567	67	10.2152	gi|270258554|emb|CBI40588.1|	67.8	1e-10	unnamed protein product [Vitis vinifera]	--	--	--
Unigene10068_Taxus	272	12	3.8139	gi|289707887|gb|ADD16954.1|	114	4e-25	SAC-like protein [Brassica rapa]	Q6GM29	84	3e-16
Unigene10069_Taxus	239	25	9.0426	--	--	--	--	--	--	--
Unigene1006_Taxus	209	1157	478.565	gi|109729545|gb|ABG46237.1|	57	6e-14	germin-like protein 5a [Hordeum vulgare subsp. vulgare]	Q6K5Q0	53.9	5e-14
Unigene10070_Taxus	1570	776	42.7283	gi|255678145|dbj|BAH94107.1|	509	1e-143	Os08g0148233 [Oryza sativa Japonica Group]	P49307	86.7	4e-16
Unigene10071_Taxus	1539	152	8.538	gi|115455129|ref|NP_001051165.1|	382	0	Os03g0731500 [Oryza sativa (japonica cultivar-group)] >gi|113549636|dbj|BAF13079.1| Os03g0731500 [Oryza sativa Japonica Group]	Q06031	118	7e-34
Unigene10072_Taxus	244	8	2.8344	--	--	--	--	--	--	--
Unigene10073_Taxus	594	60	8.7321	--	--	--	--	--	--	--
Unigene10074_Taxus	578	419	62.6671	gi|68035360|gb|AAY84871.1|	214	9e-55	pre-mRNA processing factor [Triticum aestivum]	Q3T106	100	5e-21
Unigene10075_Taxus	385	28	6.2871	--	--	--	--	--	--	--
Unigene10076_Taxus	231	13	4.865	--	--	--	--	--	--	--
Unigene10077_Taxus	811	60	6.3956	--	--	--	--	--	--	--
Unigene10078_Taxus	391	8	1.7688	--	--	--	--	--	--	--
Unigene10079_Taxus	223	9	3.4889	gi|16933575|gb|AAL30113.1|	65.5	3e-10	Ve resistance gene analog [Solanum tuberosum]	Q9C7S5	64.3	2e-10
Unigene1007_Taxus	209	7	2.8954	--	--	--	--	--	--	--
Unigene10080_Taxus	1247	595	41.2481	gi|16226338|gb|AAL16139.1|AF428307_1	82.8	1e-14	At1g70780/F5A18_4 [Arabidopsis thaliana]	Q63425	59.7	4e-08
Unigene10081_Taxus	1207	216	15.4703	gi|112982631|dbj|BAF03494.1|	255	1e-66	XRCC4 homolog [Populus nigra]	Q682V0	244	7e-64
Unigene10082_Taxus	447	27	5.2217	gi|224119620|ref|XP_002331205.1|	45.8	6e-12	multidrug/pheromone exporter, MDR family, ABC transporter family [Populus trichocarpa] >gi|222873326|gb|EEF10457.1| multidrug/pheromone exporter, MDR family, ABC transporter family [Populus trichocarpa]	P23174	50.8	3e-06
Unigene10083_Taxus	201	9	3.8708	--	--	--	--	--	--	--
Unigene10084_Taxus	247	6	2.0999	--	--	--	--	--	--	--
Unigene10085_Taxus	576	34	5.1028	--	--	--	--	--	--	--
Unigene10086_Taxus	564	124	19.0062	gi|18403117|ref|NP_564576.1|	95.1	7e-19	C2 domain-containing protein [Arabidopsis thaliana] >gi|79319640|ref|NP_001031166.1| C2 domain-containing protein [Arabidopsis thaliana] >gi|9454555|gb|AAF87878.1|AC012561_11 Unknown protein [Arabidopsis thaliana] >gi|115311401|gb|ABI93881.1| At1g50570 [Arabidopsis thaliana]	--	--	--
Unigene10087_Taxus	249	2	0.6944	--	--	--	--	--	--	--
Unigene10088_Taxus	251	18	6.1994	gi|159487561|ref|XP_001701791.1|	84.7	5e-22	coproporphyrinogen III oxidase [Chlamydomonas reinhardtii] >gi|65331760|gb|AAY42146.1| coproporphyrinogen III oxidase isoform CPX2 [Chlamydomonas reinhardtii] >gi|158281010|gb|EDP06766.1| coproporphyrinogen III oxidase [Chlamydomonas reinhardtii]	Q7MGL4	57.8	7e-16
Unigene10089_Taxus	229	20	7.55	--	--	--	--	--	--	--
Unigene1008_Taxus	530	216	35.2315	gi|27803890|gb|AAO22065.1|	215	3e-55	NtPRp27-like protein [Solanum tuberosum]	--	--	--
Unigene10090_Taxus	253	11	3.7586	--	--	--	--	--	--	--
Unigene10091_Taxus	238	6	2.1794	--	--	--	--	--	--	--
Unigene10092_Taxus	434	439	87.4437	--	--	--	--	--	--	--
Unigene10093_Taxus	248	4	1.3943	gi|148907930|gb|ABR17085.1|	53.1	2e-06	unknown [Picea sitchensis]	--	--	--
Unigene10094_Taxus	782	51	5.6379	gi|18405629|ref|NP_030664.1|	113	7e-59	amino acid transporter family protein [Arabidopsis thaliana] >gi|20197120|gb|AAD11993.2| expressed protein [Arabidopsis thaliana]	Q811P0	53.9	1e-06
Unigene10095_Taxus	506	21	3.5878	gi|255676631|dbj|BAH93283.1|	62	3e-14	Os05g0597400 [Oryza sativa Japonica Group]	--	--	--
Unigene10096_Taxus	492	126	22.139	--	--	--	--	--	--	--
Unigene10097_Taxus	1684	336	17.2485	gi|218744538|dbj|BAH03478.1|	397	1e-109	syntaxin [Nicotiana tabacum]	Q9SUJ1	366	1e-100
Unigene10098_Taxus	220	14	5.5012	--	--	--	--	--	--	--
Unigene10099_Taxus	784	89	9.8136	gi|218117601|dbj|BAH03208.1|	251	1e-65	peroxisomal monodehydroascorbate reductase [Glycine max]	Q9LK94	231	4e-60
Unigene1009_Taxus	954	72	6.5244	gi|30697060|ref|NP_176641.2|	291	4e-86	copper ion binding / methyltransferase [Arabidopsis thaliana] >gi|29028950|gb|AAO64854.1| At1g64600 [Arabidopsis thaliana]	Q3U2U7	110	1e-23
Unigene100_Taxus	224	57	21.9979	gi|224095628|ref|XP_002334744.1|	101	5e-21	cytochrome P450 [Populus trichocarpa] >gi|222874237|gb|EEF11368.1| cytochrome P450 [Populus trichocarpa]	Q50EK4	97.1	3e-20
Unigene10100_Taxus	685	84	10.6009	gi|115456091|ref|NP_001051646.1|	140	3e-32	Os03g0807900 [Oryza sativa (japonica cultivar-group)] >gi|108711663|gb|ABF99458.1| expressed protein [Oryza sativa (japonica cultivar-group)] >gi|113550117|dbj|BAF13560.1| Os03g0807900 [Oryza sativa Japonica Group]	--	--	--
Unigene10101_Taxus	1020	728	61.6999	--	--	--	--	--	--	--
Unigene10102_Taxus	675	36	4.6105	gi|115488588|ref|NP_001066781.1|	198	1e-65	Os12g0485400 [Oryza sativa (japonica cultivar-group)] >gi|122248588|sp|Q2QQS5.1|CCT14_ORYSJ RecName: Full=Cyclin-T1-4; Short=CycT1;4 >gi|113649288|dbj|BAF29800.1| Os12g0485400 [Oryza sativa Japonica Group]	Q2QQS5	198	4e-66
Unigene10103_Taxus	2660	1380	44.8488	gi|90265186|emb|CAH67657.1|	612	1e-173	H0410G08.12 [Oryza sativa (indica cultivar-group)]	Q9BUJ2	293	6e-78
Unigene10104_Taxus	276	12	3.7586	gi|115474533|ref|NP_001060863.1|	45.1	4e-10	Os08g0117700 [Oryza sativa (japonica cultivar-group)] >gi|113622832|dbj|BAF22777.1| Os08g0117700 [Oryza sativa Japonica Group]	P93194	37.4	4e-07
Unigene10105_Taxus	1004	412	35.4746	gi|15010568|gb|AAK73943.1|	136	6e-31	At2g45060/T14P1.13 [Arabidopsis thaliana] >gi|23505975|gb|AAN28847.1| At2g45060/T14P1.13 [Arabidopsis thaliana]	--	--	--
Unigene10106_Taxus	260	37	12.3022	--	--	--	--	--	--	--
Unigene10107_Taxus	293	57	16.8175	gi|20147211|gb|AAM10321.1|	59.7	2e-08	AT5g67360/K8K14_8 [Arabidopsis thaliana] >gi|24111425|gb|AAN46863.1| At5g67360/K8K14_8 [Arabidopsis thaliana]	O65351	59.7	5e-09
Unigene10108_Taxus	244	5	1.7715	gi|54888726|dbj|BAD67186.1|	53.5	1e-06	dihydroflavonol 4-reductase [Phytolacca americana]	Q84KP0	49.3	7e-06
Unigene10109_Taxus	209	4	1.6545	--	--	--	--	--	--	--
Unigene1010_Taxus	307	8	2.2527	gi|6587811|gb|AAF18502.1|AC010924_15	77.4	5e-23	ESTs gb|AI992787, gb|T20398 come from this gene [Arabidopsis thaliana]	--	--	--
Unigene10110_Taxus	414	24	5.0115	--	--	--	--	--	--	--
Unigene10111_Taxus	546	56	8.8664	gi|115448551|ref|NP_001048055.1|	108	6e-23	Os02g0736600 [Oryza sativa (japonica cultivar-group)] >gi|113537586|dbj|BAF09969.1| Os02g0736600 [Oryza sativa Japonica Group]	--	--	--
Unigene10112_Taxus	2195	1165	45.8823	gi|15242532|ref|NP_198815.1|	453	1e-126	glycosyltransferase family 14 protein / core-2/I-branching enzyme family protein [Arabidopsis thaliana] >gi|10176991|dbj|BAB10223.1| glycosylation enzyme-like protein [Arabidopsis thaliana] >gi|30102766|gb|AAP21301.1| At5g39990 [Arabidopsis thaliana]	Q5QQ57	102	1e-20
Unigene10113_Taxus	1065	89	7.2243	--	--	--	--	--	--	--
Unigene10114_Taxus	569	69	10.4831	--	--	--	--	--	--	--
Unigene10115_Taxus	2048	1060	44.7434	gi|115457942|ref|NP_001052571.1|	374	1e-102	Os04g0372800 [Oryza sativa (japonica cultivar-group)] >gi|21742151|emb|CAD40577.1| OSJNBa0069D17.2 [Oryza sativa (japonica cultivar-group)] >gi|113564142|dbj|BAF14485.1| Os04g0372800 [Oryza sativa Japonica Group]	Q5R9L3	127	4e-28
Unigene10116_Taxus	378	14	3.2018	--	--	--	--	--	--	--
Unigene10117_Taxus	244	5	1.7715	gi|92870988|gb|ABE80149.1|	50.4	4e-12	Tetratricopeptide-like helical [Medicago truncatula]	Q9SY02	48.5	2e-11
Unigene10118_Taxus	2253	301	11.5494	--	--	--	--	--	--	--
Unigene10119_Taxus	1600	819	44.2504	gi|15225187|ref|NP_180771.1|	413	1e-114	HSP70T-2 (HEAT-SHOCK PROTEIN 70T-2); ATP binding [Arabidopsis thaliana] >gi|30685183|ref|NP_850183.1| HSP70T-2 (HEAT-SHOCK PROTEIN 70T-2); ATP binding [Arabidopsis thaliana] >gi|4263707|gb|AAD15393.1| 70kD heat shock protein [Arabidopsis thaliana] >gi|21703121|gb|AAM74502.1| At2g32120/F22D22.13 [Arabidopsis thaliana] >gi|24111419|gb|AAN46859.1| At2g32120/F22D22.13 [Arabidopsis thaliana]	P26413	193	3e-48
Unigene1011_Taxus	377	11	2.5223	gi|225440392|ref|XP_002267559.1|	96.3	1e-28	PREDICTED: ripening-related protein-like [Vitis vinifera]	--	--	--
Unigene10120_Taxus	254	15	5.1052	gi|145338105|ref|NP_187098.2|	65.1	2e-19	endoribonuclease [Arabidopsis thaliana]	A2RV01	50.1	7e-13
Unigene10121_Taxus	632	45	6.1553	gi|78183583|dbj|BAD67156.2|	96.3	4e-19	PpPPR_77 [Physcomitrella patens]	Q9LFI1	89.4	2e-17
Unigene10122_Taxus	238	12	4.3587	--	--	--	--	--	--	--
Unigene10123_Taxus	814	35	3.717	gi|15237051|ref|NP_192851.1|	52.4	1e-09	RDR2 (RNA-DEPENDENT RNA POLYMERASE 2); RNA-directed RNA polymerase [Arabidopsis thaliana]	--	--	--
Unigene10124_Taxus	1289	738	49.4945	gi|15450427|gb|AAK96507.1|	155	2e-36	At1g08480/T27G7_10 [Arabidopsis thaliana] >gi|16974435|gb|AAL31221.1| At1g08480/T27G7_10 [Arabidopsis thaliana]	--	--	--
Unigene10125_Taxus	439	38	7.4829	gi|50234592|gb|AAT70497.1|	114	8e-25	S-locus-like receptor protein kinase [Prunus persica]	P17801	106	4e-23
Unigene10126_Taxus	1764	530	25.9735	gi|115436526|ref|NP_001043021.1|	290	7e-77	Os01g0360600 [Oryza sativa (japonica cultivar-group)] >gi|113532552|dbj|BAF04935.1| Os01g0360600 [Oryza sativa Japonica Group]	Q3ABL6	179	7e-44
Unigene10127_Taxus	330	22	5.7632	gi|115463359|ref|NP_001055279.1|	55.5	3e-07	Os05g0352700 [Oryza sativa (japonica cultivar-group)]	--	--	--
Unigene10128_Taxus	267	10	3.2377	--	--	--	--	--	--	--
Unigene10129_Taxus	2881	1314	39.4281	gi|115449487|ref|NP_001048478.1|	772	0	Os02g0812400 [Oryza sativa (japonica cultivar-group)] >gi|113538009|dbj|BAF10392.1| Os02g0812400 [Oryza sativa Japonica Group]	Q54RF3	437	1e-121
Unigene1012_Taxus	544	43	6.8332	gi|226509364|ref|NP_001152312.1|	203	2e-51	LOC100285951 [Zea mays] >gi|195654987|gb|ACG46961.1| catalytic/ hydrolase [Zea mays]	--	--	--
Unigene10130_Taxus	235	13	4.7822	--	--	--	--	--	--	--
Unigene10131_Taxus	931	216	20.0566	gi|87240437|gb|ABD32295.1|	377	1e-112	WD40-like [Medicago truncatula]	Q9FMU5	358	1e-105
Unigene10132_Taxus	476	15	2.7242	--	--	--	--	--	--	--
Unigene10133_Taxus	279	6	1.8591	--	--	--	--	--	--	--
Unigene10134_Taxus	374	71	16.4112	--	--	--	--	--	--	--
Unigene10135_Taxus	293	19	5.6058	gi|8894546|emb|CAB95828.1|	52.8	2e-06	hypothetical protein [Cicer arietinum]	--	--	--
Unigene10136_Taxus	300	5	1.4408	--	--	--	--	--	--	--
Unigene10137_Taxus	2822	504	15.4393	gi|115475559|ref|NP_001061376.1|	209	4e-52	Os08g0250900 [Oryza sativa (japonica cultivar-group)] >gi|113623345|dbj|BAF23290.1| Os08g0250900 [Oryza sativa Japonica Group]	O67588	81.6	3e-14
Unigene10138_Taxus	217	8	3.187	--	--	--	--	--	--	--
Unigene10139_Taxus	880	115	11.2971	--	--	--	--	--	--	--
Unigene1013_Taxus	257	8	2.691	gi|115484523|ref|NP_001067405.1|	94	1e-31	Os11g0186400 [Oryza sativa (japonica cultivar-group)] >gi|13124219|sp|Q9LRE6.1|DPOD1_ORYSJ RecName: Full=DNA polymerase delta catalytic subunit >gi|9188570|dbj|BAA99573.1| OsPol delta large subunit [Oryza sativa Japonica Group] >gi|62734232|gb|AAX96341.1| dna polymerase delta catalytic subunit (ec 2.7.7.7) [Oryza sativa Japonica Group] >gi|113644627|dbj|BAF27768.1| Os11g0186400 [Oryza sativa Japo…	Q9LRE6	94	3e-32
Unigene10140_Taxus	1280	261	17.6272	gi|186523158|ref|NP_197072.3|	550	1e-162	binding [Arabidopsis thaliana]	O94915	61.6	1e-08
Unigene10141_Taxus	2064	282	11.8112	gi|115448113|ref|NP_001047836.1|	106	1e-22	Os02g0700000 [Oryza sativa (japonica cultivar-group)] >gi|113537367|dbj|BAF09750.1| Os02g0700000 [Oryza sativa Japonica Group]	--	--	--
Unigene10142_Taxus	214	7	2.8277	--	--	--	--	--	--	--
Unigene10143_Taxus	1088	504	40.0456	gi|239056165|emb|CAQ58596.1|	291	1e-77	Unknown gene [Vitis vinifera]	Q9DD02	60.5	2e-08
Unigene10144_Taxus	409	21	4.4386	gi|48310199|gb|AAT41773.1|	76.6	4e-25	At5g24600 [Arabidopsis thaliana] >gi|50198891|gb|AAT70465.1| At5g24600 [Arabidopsis thaliana]	--	--	--
Unigene10145_Taxus	535	47	7.5945	gi|224080516|ref|XP_002306147.1|	107	1e-22	SAUR family protein [Populus trichocarpa] >gi|222849111|gb|EEE86658.1| SAUR family protein [Populus trichocarpa]	P32295	82.8	1e-15
Unigene10146_Taxus	247	14	4.8999	--	--	--	--	--	--	--
Unigene10147_Taxus	1733	603	30.0796	gi|78191450|gb|ABB29946.1|	303	8e-81	F-box family protein-like [Solanum tuberosum]	Q9FL82	273	4e-72
Unigene10148_Taxus	2022	346	14.7927	gi|115475283|ref|NP_001061238.1|	705	0	Os08g0206400 [Oryza sativa (japonica cultivar-group)]	O49423	659	0
Unigene10149_Taxus	965	161	14.4229	gi|116793797|gb|ABK26881.1|	53.5	1e-12	unknown [Picea sitchensis]	--	--	--
Unigene1014_Taxus	225	4	1.5368	--	--	--	--	--	--	--
Unigene10150_Taxus	244	13	4.6058	--	--	--	--	--	--	--
Unigene10151_Taxus	257	6	2.0182	--	--	--	--	--	--	--
Unigene10152_Taxus	255	9	3.0511	--	--	--	--	--	--	--
Unigene10153_Taxus	1034	330	27.5897	gi|18398731|ref|NP_565438.1|	169	7e-41	ribosomal protein L6 family protein [Arabidopsis thaliana]	P26861	145	3e-34
Unigene10154_Taxus	240	5	1.801	gi|18423070|ref|NP_568713.1|	54.3	3e-08	emb1879 (embryo defective 1879) [Arabidopsis thaliana]	--	--	--
Unigene10155_Taxus	2355	1677	61.5596	gi|115471885|ref|NP_001059541.1|	801	0	Os07g0447800 [Oryza sativa (japonica cultivar-group)] >gi|113611077|dbj|BAF21455.1| Os07g0447800 [Oryza sativa Japonica Group]	P40390	146	6e-34
Unigene10156_Taxus	840	152	15.6429	gi|115461200|ref|NP_001054200.1|	185	1e-45	Os04g0669100 [Oryza sativa (japonica cultivar-group)] >gi|113565771|dbj|BAF16114.1| Os04g0669100 [Oryza sativa Japonica Group]	--	--	--
Unigene10157_Taxus	326	73	19.3579	gi|255573810|ref|XP_002527824.1|	52.4	3e-06	structural constituent of ribosome, putative [Ricinus communis] >gi|223532748|gb|EEF34527.1| structural constituent of ribosome, putative [Ricinus communis]	--	--	--
Unigene10158_Taxus	265	10	3.2622	gi|254033594|gb|ACT55265.1|	72.8	2e-22	formin 2B [Physcomitrella patens]	Q7G6K7	71.6	8e-23
Unigene10159_Taxus	358	29	7.0027	gi|195654043|gb|ACG46489.1|	74.7	5e-13	F-box domain containing protein [Zea mays]	Q9FLX3	71.6	1e-12
Unigene1015_Taxus	877	37	3.6472	--	--	--	--	--	--	--
Unigene10160_Taxus	2738	886	27.9739	gi|115441713|ref|NP_001045136.1|	475	1e-132	Os01g0907300 [Oryza sativa (japonica cultivar-group)] >gi|113534667|dbj|BAF07050.1| Os01g0907300 [Oryza sativa Japonica Group]	Q96S52	186	1e-45
Unigene10161_Taxus	229	9	3.3975	--	--	--	--	--	--	--
Unigene10162_Taxus	310	32	8.9236	--	--	--	--	--	--	--
Unigene10163_Taxus	464	47	8.7566	--	--	--	--	--	--	--
Unigene10164_Taxus	251	10	3.4441	--	--	--	--	--	--	--
Unigene10165_Taxus	253	12	4.1003	gi|242063296|ref|XP_002452937.1|	41.2	2e-07	hypothetical protein SORBIDRAFT_04g035270 [Sorghum bicolor] >gi|241932768|gb|EES05913.1| hypothetical protein SORBIDRAFT_04g035270 [Sorghum bicolor]	--	--	--
Unigene10166_Taxus	1172	641	47.2807	gi|48310194|gb|AAT41772.1|	198	7e-62	At2g46100 [Arabidopsis thaliana] >gi|50198900|gb|AAT70469.1| At2g46100 [Arabidopsis thaliana]	--	--	--
Unigene10167_Taxus	418	26	5.3771	gi|42362268|gb|AAS13367.1|	158	4e-38	cyclin-dependent kinases regulatory subunit [Glycine max]	O23249	158	1e-38
Unigene10168_Taxus	1879	368	16.9307	gi|57900350|dbj|BAD87340.1|	290	6e-77	transcriptional regulator family protein-like [Oryza sativa Japonica Group] >gi|57900391|dbj|BAD87601.1| transcriptional regulator family protein-like [Oryza sativa Japonica Group]	Q02614	90.1	5e-17
Unigene10169_Taxus	422	8	1.6388	--	--	--	--	--	--	--
Unigene1016_Taxus	510	58	9.8313	--	--	--	--	--	--	--
Unigene10170_Taxus	276	16	5.0115	--	--	--	--	--	--	--
Unigene10171_Taxus	384	25	5.6281	--	--	--	--	--	--	--
Unigene10172_Taxus	491	32	5.6341	gi|27311757|gb|AAO00844.1|	82.4	3e-15	Unknown protein [Arabidopsis thaliana]	--	--	--
Unigene10173_Taxus	256	8	2.7015	--	--	--	--	--	--	--
Unigene10174_Taxus	1910	840	38.0189	gi|227121304|gb|ACP19342.1|	842	0	phosphate transporter [Glycine max]	Q8H6H2	819	0
Unigene10175_Taxus	4569	3081	58.294	gi|186510627|ref|NP_189916.4|	1894	0	ATMIN7 (ARABIDOPSIS THALIANA HOPM INTERACTOR 7); guanyl-nucleotide exchange factor/ protein binding [Arabidopsis thaliana]	Q9Y6D5	754	0
Unigene10176_Taxus	1094	176	13.9075	gi|226508822|ref|NP_001150810.1|	266	8e-70	LOC100284443 [Zea mays] >gi|195642084|gb|ACG40510.1| dual specificity protein phosphatase Diacylglycerol kinase, catalytic region [Zea mays]	P76093	66.6	3e-10
Unigene10177_Taxus	477	53	9.6053	--	--	--	--	--	--	--
Unigene10178_Taxus	383	28	6.3199	--	--	--	--	--	--	--
Unigene10179_Taxus	808	82	8.7732	gi|115465725|ref|NP_001056462.1|	190	3e-89	Os05g0586500 [Oryza sativa (japonica cultivar-group)] >gi|113580013|dbj|BAF18376.1| Os05g0586500 [Oryza sativa Japonica Group]	--	--	--
Unigene1017_Taxus	482	20	3.587	--	--	--	--	--	--	--
Unigene10180_Taxus	617	59	8.2665	gi|3914559|sp|Q43463.1|RAB7_SOYBN	268	5e-71	RecName: Full=Ras-related protein Rab7 >gi|414834|gb|AAA34004.1| Rab7p [Glycine max]	Q41640	268	1e-71
Unigene10181_Taxus	435	54	10.7314	gi|3329366|gb|AAC39500.1|	102	2e-21	nodule-specific protein Nlj70 [Lotus japonicus]	--	--	--
Unigene10182_Taxus	296	18	5.257	gi|40714037|dbj|BAD06943.1|	132	2e-30	gibberellin 3-oxidase-like protein [Ipomoea nil]	Q9ZT84	109	5e-24
Unigene10183_Taxus	1597	525	28.4189	gi|97974153|dbj|BAE94397.1|	562	1e-159	WD40 repeat protein [Ipomoea purpurea] >gi|97974167|dbj|BAE94399.1| WD40 repeat protein [Ipomoea nil]	Q9LPV9	545	1e-154
Unigene10184_Taxus	608	24	3.4124	gi|226508388|ref|NP_001149390.1|	83.2	6e-27	transcription factor GT-3b [Zea mays] >gi|195626884|gb|ACG35272.1| transcription factor GT-3b [Zea mays]	--	--	--
Unigene10185_Taxus	614	100	14.0794	--	--	--	--	--	--	--
Unigene10186_Taxus	487	37	6.5679	gi|115467686|ref|NP_001057442.1|	81.6	6e-15	Os06g0298400 [Oryza sativa (japonica cultivar-group)] >gi|53792505|dbj|BAD53469.1| WW domain-containing protein-like [Oryza sativa Japonica Group] >gi|113595482|dbj|BAF19356.1| Os06g0298400 [Oryza sativa Japonica Group]	Q8N3X1	55.1	2e-07
Unigene10187_Taxus	247	11	3.8499	--	--	--	--	--	--	--
Unigene10188_Taxus	730	243	28.7764	gi|22330642|ref|NP_177656.2|	180	3e-44	flavodoxin family protein / radical SAM domain-containing protein [Arabidopsis thaliana] >gi|75158883|sp|Q8RXN5.1|TYW1_ARATH RecName: Full=tRNA wybutosine-synthesizing protein 1 homolog	Q8RXN5	180	9e-45
Unigene10189_Taxus	2790	1014	31.4186	gi|124359654|gb|ABN06026.1|	473	0	Peptidase, trypsin-like serine and cysteine proteases [Medicago truncatula]	--	--	--
Unigene1018_Taxus	249	9	3.1246	gi|87240430|gb|ABD32288.1|	42	3e-08	Tetratricopeptide-like helical [Medicago truncatula]	Q9SN39	37.4	2e-07
Unigene10190_Taxus	3231	1787	47.8125	gi|2499556|sp|Q40762.1|PHY_PICAB	1275	0	RecName: Full=Phytochrome >gi|1399958|gb|AAB03339.1| phytochrome [Picea abies]	Q40762	1275	0
Unigene10191_Taxus	451	17	3.2586	gi|115472149|ref|NP_001059673.1|	66.2	1e-25	Os07g0490300 [Oryza sativa (japonica cultivar-group)]	--	--	--
Unigene10192_Taxus	1312	196	12.9144	gi|15242199|ref|NP_197009.1|	417	1e-133	glycosyltransferase family 14 protein / core-2/I-branching enzyme family protein [Arabidopsis thaliana] >gi|16209674|gb|AAL14395.1| AT5g15050/F2G14_170 [Arabidopsis thaliana] >gi|21700835|gb|AAM70541.1| AT5g15050/F2G14_170 [Arabidopsis thaliana]	Q5QQ56	80.5	3e-15
Unigene10193_Taxus	258	81	27.1406	--	--	--	--	--	--	--
Unigene10194_Taxus	257	8	2.691	--	--	--	--	--	--	--
Unigene10195_Taxus	444	12	2.3364	gi|15226168|ref|NP_178215.1|	53.5	1e-06	nucleic acid binding / zinc ion binding [Arabidopsis thaliana]	--	--	--
Unigene10196_Taxus	238	22	7.991	--	--	--	--	--	--	--
Unigene10197_Taxus	3783	996	22.7602	gi|224589537|gb|ACN59302.1|	497	1e-139	leucine-rich repeat receptor-like protein kinase [Arabidopsis thaliana]	Q9SYQ8	262	2e-68
Unigene10198_Taxus	310	17	4.7407	gi|13661209|gb|AAK37830.1|AF132126_1	178	3e-44	laccase [Pinus taeda]	Q8VZA1	141	1e-33
Unigene10199_Taxus	1081	172	13.7549	gi|229609855|gb|ACQ83543.1|	273	6e-72	calcineurin B-like protein 01 [Selaginella moellendorffii]	Q7XC27	251	5e-66
Unigene1019_Taxus	302	8	2.29	--	--	--	--	--	--	--
Unigene101_Taxus	284	289	87.9697	--	--	--	--	--	--	--
Unigene10200_Taxus	554	61	9.5186	gi|162460162|ref|NP_001106062.1|	127	3e-40	pentatricopeptide repeat protein 5 [Zea mays] >gi|154520281|gb|ABS82814.1| pentatricopeptide repeat protein 5 [Zea mays]	Q9SV96	125	6e-40
Unigene10201_Taxus	464	49	9.1292	gi|22329309|ref|NP_171799.2|	139	3e-32	PEX6 (PEROXIN 6); ATP binding / ATPase/ nucleoside-triphosphatase/ nucleotide binding [Arabidopsis thaliana] >gi|19310449|gb|AAL84960.1| At1g03000/F22D16.27 [Arabidopsis thaliana] >gi|24797060|gb|AAN64542.1| At1g03000/F22D16.27 [Arabidopsis thaliana] >gi|37223130|gb|AAQ90161.1| AAA family ATPase peroxin 6 [Arabidopsis thaliana]	Q54CS8	120	2e-32
Unigene10202_Taxus	346	26	6.4961	--	--	--	--	--	--	--
Unigene10203_Taxus	383	142	32.0511	gi|255676077|dbj|BAH92971.1|	103	1e-21	Os05g0178300 [Oryza sativa Japonica Group]	--	--	--
Unigene10204_Taxus	1405	143	8.7986	gi|240254403|ref|NP_178082.6|	54.3	1e-09	ATP binding / kinase/ protein kinase/ protein serine/threonine kinase/ protein tyrosine kinase [Arabidopsis thaliana]	--	--	--
Unigene10205_Taxus	2633	449	14.7417	gi|46560595|gb|AAT00626.1|	475	1e-132	calmodulin-binding ion transporter-like protein [Physcomitrella patens]	--	--	--
Unigene10206_Taxus	1196	260	18.793	gi|20160570|dbj|BAB89518.1|	200	6e-50	zinc finger protein-like [Oryza sativa Japonica Group] >gi|20805170|dbj|BAB92839.1| zinc finger protein-like [Oryza sativa Japonica Group] >gi|255673877|dbj|BAH91384.1| Os01g0850200 [Oryza sativa Japonica Group]	--	--	--
Unigene10207_Taxus	229	25	9.4375	--	--	--	--	--	--	--
Unigene10208_Taxus	222	16	6.2305	--	--	--	--	--	--	--
Unigene10209_Taxus	978	58	5.1268	gi|4204261|gb|AAD10642.1|	113	4e-33	Hypothetical protein [Arabidopsis thaliana]	--	--	--
Unigene1020_Taxus	289	9	2.6921	gi|255951368|ref|XP_002566451.1|	70.5	2e-22	Pc22g25660 [Penicillium chrysogenum Wisconsin 54-1255] >gi|211593468|emb|CAP99854.1| Pc22g25660 [Penicillium chrysogenum Wisconsin 54-1255]	P05747	52.8	5e-11
Unigene10210_Taxus	1267	99	6.7548	gi|115462971|ref|NP_001055085.1|	327	5e-88	Os05g0279600 [Oryza sativa (japonica cultivar-group)] >gi|113578636|dbj|BAF16999.1| Os05g0279600 [Oryza sativa Japonica Group]	--	--	--
Unigene10211_Taxus	360	20	4.8027	--	--	--	--	--	--	--
Unigene10212_Taxus	227	89	33.8936	--	--	--	--	--	--	--
Unigene10213_Taxus	472	13	2.381	--	--	--	--	--	--	--
Unigene10214_Taxus	1468	244	14.3687	--	--	--	--	--	--	--
Unigene10215_Taxus	248	7	2.4401	gi|115484217|ref|NP_001065770.1|	93.6	1e-18	Os11g0151800 [Oryza sativa (japonica cultivar-group)]	Q9LJU7	86.3	5e-17
Unigene10216_Taxus	250	16	5.5327	--	--	--	--	--	--	--
Unigene10217_Taxus	647	36	4.8101	gi|78183583|dbj|BAD67156.2|	41.2	4e-06	PpPPR_77 [Physcomitrella patens]	--	--	--
Unigene10218_Taxus	293	4	1.1802	--	--	--	--	--	--	--
Unigene10219_Taxus	511	52	8.797	gi|226506680|ref|NP_001148148.1|	155	3e-37	protein kinase KIPK [Zea mays] >gi|195616120|gb|ACG29890.1| protein kinase KIPK [Zea mays]	Q9LSF1	146	1e-37
Unigene1021_Taxus	256	6	2.0261	--	--	--	--	--	--	--
Unigene10220_Taxus	983	101	8.8822	gi|18400779|ref|NP_566515.1|	226	6e-58	WD-40 repeat family protein [Arabidopsis thaliana] >gi|13937211|gb|AAK50098.1|AF372960_1 AT3g15470/MJK13_13 [Arabidopsis thaliana] >gi|15795112|dbj|BAB02376.1| WD-40 repeat protein-like [Arabidopsis thaliana] >gi|19548013|gb|AAL87370.1| AT3g15470/MJK13_13 [Arabidopsis thaliana]	Q9XSC3	57.8	1e-07
Unigene10221_Taxus	230	16	6.0138	gi|15242148|ref|NP_200558.1|	53.9	9e-07	transferase, transferring glycosyl groups [Arabidopsis thaliana]	--	--	--
Unigene10222_Taxus	263	6	1.9722	--	--	--	--	--	--	--
Unigene10223_Taxus	221	6	2.347	--	--	--	--	--	--	--
Unigene10224_Taxus	1718	755	37.9907	gi|89953403|gb|ABD83295.1|	378	1e-103	Fgenesh protein 81 [Beta vulgaris]	Q8N6M0	182	8e-45
Unigene10225_Taxus	245	9	3.1756	--	--	--	--	--	--	--
Unigene10226_Taxus	288	14	4.2023	--	--	--	--	--	--	--
Unigene10227_Taxus	1060	123	10.0312	gi|193884065|dbj|BAG54845.1|	192	5e-70	chloroplast unusual positioning 1A [Adiantum capillus-veneris]	Q9LI74	168	5e-62
Unigene10228_Taxus	1783	1428	69.2357	gi|5733089|gb|AAD49420.1|AF172681_1	581	1e-164	amine oxidase [Canavalia lineata]	Q8H1H9	486	1e-136
Unigene10229_Taxus	374	39	9.0146	gi|158322026|gb|ABW33492.1|	199	1e-50	phytochrome O [Pinus sylvestris] >gi|158322028|gb|ABW33493.1| phytochrome O [Pinus sylvestris] >gi|158322030|gb|ABW33494.1| phytochrome O [Pinus sylvestris] >gi|158322032|gb|ABW33495.1| phytochrome O [Pinus sylvestris] >gi|158322034|gb|ABW33496.1| phytochrome O [Pinus sylvestris] >gi|158322036|gb|ABW33497.1| phytochrome O [Pinus sylvestris] >gi|158322038|gb|ABW33498.1| phytochrome O [Pinus sylves…	Q01549	198	7e-51
Unigene1022_Taxus	1098	261	20.549	gi|115464635|ref|NP_001055917.1|	195	1e-48	Os05g0493100 [Oryza sativa (japonica cultivar-group)] >gi|113579468|dbj|BAF17831.1| Os05g0493100 [Oryza sativa Japonica Group]	Q8GYA4	191	1e-47
Unigene10230_Taxus	405	128	27.3217	--	--	--	--	--	--	--
Unigene10231_Taxus	755	75	8.5875	gi|116791256|gb|ABK25912.1|	180	2e-44	unknown [Picea sitchensis]	--	--	--
Unigene10232_Taxus	245	5	1.7642	--	--	--	--	--	--	--
Unigene10233_Taxus	1396	623	38.5795	gi|115453365|ref|NP_001050283.1|	319	1e-85	Os03g0392300 [Oryza sativa (japonica cultivar-group)] >gi|108708583|gb|ABF96378.1| small GTP-binding protein domain containing protein, expressed [Oryza sativa (japonica cultivar-group)] >gi|113548754|dbj|BAF12197.1| Os03g0392300 [Oryza sativa Japonica Group]	Q32LJ2	172	4e-42
Unigene10234_Taxus	751	55	6.3311	gi|15223926|ref|NP_177860.1|	134	8e-61	pentatricopeptide (PPR) repeat-containing protein [Arabidopsis thaliana]	Q9FVX2	134	3e-61
Unigene10235_Taxus	372	14	3.2534	gi|42565057|ref|NP_188690.3|	101	4e-21	POLGAMMA1 (polymerase gamma 1); 3'-5' exonuclease/ DNA binding / DNA-directed DNA polymerase/ nucleic acid binding [Arabidopsis thaliana] >gi|30313818|gb|AAO34128.1| PolI-like DNA polymerase [Arabidopsis thaliana] >gi|71013474|dbj|BAE10874.1| PolI-like B DNA polymerase [Arabidopsis thaliana]	--	--	--
Unigene10236_Taxus	224	10	3.8593	--	--	--	--	--	--	--
Unigene10237_Taxus	1480	322	18.8082	gi|14149116|dbj|BAB55655.1|	431	1e-119	fructose-6-phosphate 2-kinase/fructose-2,6-bisphosphatase [Bruguiera gymnorhiza]	O35552	61.6	1e-08
Unigene10238_Taxus	215	4	1.6083	--	--	--	--	--	--	--
Unigene10239_Taxus	268	8	2.5805	--	--	--	--	--	--	--
Unigene1023_Taxus	233	5	1.8551	gi|7939537|dbj|BAA95740.1|	69.3	2e-16	chromosome condensation regulator-like protein protein [Arabidopsis thaliana]	Q9TZD0	48.9	9e-06
Unigene10240_Taxus	389	51	11.3338	--	--	--	--	--	--	--
Unigene10241_Taxus	216	13	5.2029	--	--	--	--	--	--	--
Unigene10242_Taxus	1128	146	11.1892	gi|56118085|gb|AAV73918.1|	168	2e-92	calmodulin binding heat shock protein [Gossypium hirsutum]	--	--	--
Unigene10243_Taxus	622	69	9.5899	gi|115471565|ref|NP_001059381.1|	93.6	1e-29	Os07g0283200 [Oryza sativa (japonica cultivar-group)] >gi|113610917|dbj|BAF21295.1| Os07g0283200 [Oryza sativa Japonica Group]	--	--	--
Unigene10244_Taxus	384	64	14.408	--	--	--	--	--	--	--
Unigene10245_Taxus	641	52	7.0129	gi|110738810|dbj|BAF01328.1|	53.5	3e-06	STICHEL [Arabidopsis thaliana]	--	--	--
Unigene10246_Taxus	293	12	3.5405	--	--	--	--	--	--	--
Unigene10247_Taxus	257	65	21.8642	--	--	--	--	--	--	--
Unigene10248_Taxus	1215	618	43.9709	gi|224057347|ref|XP_002299213.1|	311	2e-83	f-box family protein [Populus trichocarpa] >gi|222846471|gb|EEE84018.1| f-box family protein [Populus trichocarpa]	Q94FT2	298	7e-80
Unigene10249_Taxus	3434	1437	36.1751	gi|10086499|gb|AAG12559.1|AC007797_19	141	9e-32	Unknown Protein [Arabidopsis thaliana]	Q9FXI5	141	4e-32
Unigene1024_Taxus	468	57	10.5289	--	--	--	--	--	--	--
Unigene10250_Taxus	315	28	7.6842	gi|115455299|ref|NP_001051250.1|	64.3	4e-16	Os03g0746500 [Oryza sativa (japonica cultivar-group)] >gi|108711051|gb|ABF98846.1| Helicase conserved C-terminal domain containing protein, expressed [Oryza sativa (japonica cultivar-group)] >gi|113549721|dbj|BAF13164.1| Os03g0746500 [Oryza sativa Japonica Group] >gi|260800457|gb|ACX50964.1| ATP-dependent RNA helicase [Oryza sativa Japonica Group]	--	--	--
Unigene10251_Taxus	305	8	2.2675	--	--	--	--	--	--	--
Unigene10252_Taxus	1576	244	13.384	gi|15240262|ref|NP_201528.1|	219	1e-55	ATEB1C (microtubule end binding protein 1); microtubule binding [Arabidopsis thaliana] >gi|21593362|gb|AAM65311.1| microtubule-associated protein EB1-like protein [Arabidopsis thaliana] >gi|114050655|gb|ABI49477.1| At5g67270 [Arabidopsis thaliana]	Q8WQ86	117	2e-25
Unigene10253_Taxus	260	18	5.9848	gi|148909021|gb|ABR17614.1|	52	4e-06	unknown [Picea sitchensis]	--	--	--
Unigene10254_Taxus	540	17	2.7215	gi|115485019|ref|NP_001067653.1|	68.9	5e-11	Os11g0264500 [Oryza sativa (japonica cultivar-group)] >gi|113644875|dbj|BAF28016.1| Os11g0264500 [Oryza sativa Japonica Group]	--	--	--
Unigene10255_Taxus	3783	1298	29.6614	gi|115456755|ref|NP_001051978.1|	405	1e-111	Os03g0861100 [Oryza sativa (japonica cultivar-group)] >gi|108712232|gb|ABG00027.1| expressed protein [Oryza sativa (japonica cultivar-group)] >gi|113550449|dbj|BAF13892.1| Os03g0861100 [Oryza sativa Japonica Group]	Q4A0V8	55.5	3e-06
Unigene10256_Taxus	609	211	29.9515	--	--	--	--	--	--	--
Unigene10257_Taxus	464	21	3.9125	gi|15237259|ref|NP_197715.1|	63.5	1e-09	DNAJ heat shock N-terminal domain-containing protein [Arabidopsis thaliana] >gi|134031908|gb|ABO45691.1| At5g23240 [Arabidopsis thaliana]	--	--	--
Unigene10258_Taxus	250	14	4.8411	--	--	--	--	--	--	--
Unigene10259_Taxus	2300	331	12.441	gi|5263327|gb|AAD41429.1|AC007727_18	299	1e-103	EST gb|T20649 comes from this gene [Arabidopsis thaliana]	P33485	67	6e-10
Unigene1025_Taxus	2625	976	32.1421	gi|115483492|ref|NP_001065416.1|	470	1e-131	Os10g0565000 [Oryza sativa (japonica cultivar-group)] >gi|31433552|gb|AAP55050.1| ICE-like protease p20 domain containing protein, expressed [Oryza sativa (japonica cultivar-group)] >gi|113639948|dbj|BAF27253.1| Os10g0565000 [Oryza sativa Japonica Group]	Q56YP2	129	1e-28
Unigene10260_Taxus	275	18	5.6584	--	--	--	--	--	--	--
Unigene10261_Taxus	299	17	4.9151	--	--	--	--	--	--	--
Unigene10262_Taxus	995	152	13.2061	gi|15231863|ref|NP_190938.1|	142	1e-32	MEE40 (maternal effect embryo arrest 40) [Arabidopsis thaliana] >gi|75174107|sp|Q9LFF1.1|PP281_ARATH RecName: Full=Pentatricopeptide repeat-containing protein At3g53700, chloroplastic; AltName: Full=Protein MATERNAL EFFECT EMBRYO ARREST 40; Flags: Precursor >gi|15982931|gb|AAL09812.1| AT3g53700/F4P12_400 [Arabidopsis thaliana]	Q9LFF1	142	5e-33
Unigene10263_Taxus	629	46	6.3221	gi|54695180|dbj|BAD67155.1|	119	9e-36	PpPPR_98 [Physcomitrella patens]	P93005	122	7e-34
Unigene10264_Taxus	223	3	1.163	--	--	--	--	--	--	--
Unigene10265_Taxus	585	83	12.2652	gi|115456027|ref|NP_001051614.1|	85.1	8e-16	Os03g0803900 [Oryza sativa (japonica cultivar-group)] >gi|113550085|dbj|BAF13528.1| Os03g0803900 [Oryza sativa Japonica Group]	Q8GXG6	82.4	2e-15
Unigene10266_Taxus	722	218	26.1019	gi|226497034|ref|NP_001149714.1|	327	1e-88	LOC100283341 [Zea mays] >gi|195629710|gb|ACG36496.1| adenylate kinase [Zea mays]	Q9ZUU1	307	4e-83
Unigene10267_Taxus	442	20	3.9117	gi|11558252|emb|CAC17794.1|	208	3e-53	microtubule-associated protein MAP65-1a [Nicotiana tabacum]	--	--	--
Unigene10268_Taxus	1370	870	54.8975	gi|64976601|dbj|BAD98470.1|	377	1e-103	casein protein kinase 2 alpha subunit [Lolium perenne]	Q08467	372	1e-102
Unigene10269_Taxus	244	2	0.7086	--	--	--	--	--	--	--
Unigene1026_Taxus	754	141	16.166	gi|115455279|ref|NP_001051240.1|	258	9e-68	Os03g0744800 [Oryza sativa (japonica cultivar-group)] >gi|108711032|gb|ABF98827.1| emp24/gp25L/p24 family protein, expressed [Oryza sativa (japonica cultivar-group)] >gi|113549711|dbj|BAF13154.1| Os03g0744800 [Oryza sativa Japonica Group]	Q63524	71.6	5e-12
Unigene10270_Taxus	2093	838	34.6121	gi|226496015|ref|NP_001149402.1|	355	2e-96	nodulin-like protein [Zea mays] >gi|195627006|gb|ACG35333.1| nodulin-like protein [Zea mays]	Q6CGU8	65.9	1e-09
Unigene10271_Taxus	1203	277	19.9053	gi|18394361|ref|NP_563997.1|	184	5e-45	surfeit locus protein 5 family protein / SURF5 family protein [Arabidopsis thaliana] >gi|4966364|gb|AAD34695.1|AC006341_23 Similar to gb|AJ224359 surfeit locus protein 5 (surf5b) from Homo sapiens [Arabidopsis thaliana] >gi|28372846|gb|AAO39905.1| At1g16430 [Arabidopsis thaliana]	A0JPN6	90.5	2e-17
Unigene10272_Taxus	1097	262	20.6466	gi|115480611|ref|NP_001063899.1|	294	2e-78	Os09g0556500 [Oryza sativa (japonica cultivar-group)] >gi|113632132|dbj|BAF25813.1| Os09g0556500 [Oryza sativa Japonica Group]	Q3A8C9	159	2e-38
Unigene10273_Taxus	1191	975	70.7695	gi|195622666|gb|ACG33163.1|	345	9e-94	ADP-ribosylation factor 3 [Zea mays]	Q96361	339	3e-92
Unigene10274_Taxus	1111	3181	247.516	--	--	--	--	--	--	--
Unigene10275_Taxus	960	269	24.2234	gi|172072883|ref|YP_001806644.1|	221	1e-56	ribosomal protein S8 [Cryptomeria japonica] >gi|171854902|dbj|BAG16642.1| ribosomal protein S8 [Cryptomeria japonica] >gi|239794271|dbj|BAH73268.1| ribosomal protein S8 [Cryptomeria japonica] >gi|239794353|dbj|BAH73349.1| ribosomal protein S8 [Cryptomeria japonica]	Q85WZ6	204	6e-52
Unigene10276_Taxus	969	315	28.1022	gi|108706860|gb|ABF94655.1|	62.4	1e-08	expressed protein [Oryza sativa (japonica cultivar-group)] >gi|255674313|dbj|BAH92042.1| Os03g0217000 [Oryza sativa Japonica Group]	--	--	--
Unigene10277_Taxus	359	33	7.9464	--	--	--	--	--	--	--
Unigene10278_Taxus	1291	112	7.4997	gi|8572647|gb|AAF77107.1|AF228103_1	482	1e-135	maturase [Taxus wallichiana var. mairei] >gi|94450110|gb|ABF19589.1| maturase K [Taxus wallichiana var. wallichiana]	Q7IS11	480	1e-135
Unigene10279_Taxus	276	6	1.8793	gi|115456285|ref|NP_001051743.1|	55.1	4e-07	Os03g0823500 [Oryza sativa (japonica cultivar-group)] >gi|108711822|gb|ABF99617.1| POT family protein, expressed [Oryza sativa (japonica cultivar-group)] >gi|113550214|dbj|BAF13657.1| Os03g0823500 [Oryza sativa Japonica Group]	P46032	50.1	4e-06
Unigene1027_Taxus	315	22	6.0376	gi|115477473|ref|NP_001062332.1|	126	1e-28	Os08g0531200 [Oryza sativa (japonica cultivar-group)]	Q10282	49.7	5e-06
Unigene10280_Taxus	355	25	6.0879	gi|60327196|gb|AAX19021.1|	107	9e-23	Cf-2.3 [Solanum pimpinellifolium]	Q9LHP4	101	2e-21
Unigene10281_Taxus	949	373	33.9779	gi|42568735|ref|NP_201151.2|	154	3e-36	SAP domain-containing protein [Arabidopsis thaliana] >gi|48310085|gb|AAT41750.1| At5g63460 [Arabidopsis thaliana] >gi|52627115|gb|AAU84684.1| At5g63460 [Arabidopsis thaliana]	--	--	--
Unigene10282_Taxus	305	56	15.8724	gi|237682377|gb|ACR10238.1|	127	7e-29	heparanase [Oryza sativa Indica Group]	Q8L608	118	1e-26
Unigene10283_Taxus	283	7	2.1383	--	--	--	--	--	--	--
Unigene10284_Taxus	325	111	29.5252	--	--	--	--	--	--	--
Unigene10285_Taxus	274	6	1.893	--	--	--	--	--	--	--
Unigene10286_Taxus	1308	265	17.5143	gi|115448047|ref|NP_001047803.1|	285	1e-143	Os02g0693700 [Oryza sativa (japonica cultivar-group)] >gi|27368851|emb|CAD59583.1| MDR-like ABC transporter [Oryza sativa (japonica cultivar-group)] >gi|41052997|dbj|BAD07906.1| MDR-like ABC transporter [Oryza sativa Japonica Group] >gi|41053280|dbj|BAD07706.1| MDR-like ABC transporter [Oryza sativa Japonica Group] >gi|113537334|dbj|BAF09717.1| Os02g0693700 [Oryza sativa Japonica Group]	Q8LPK2	279	1e-137
Unigene10287_Taxus	503	6	1.0312	--	--	--	--	--	--	--
Unigene10288_Taxus	497	28	4.8703	gi|3894387|gb|AAC78593.1|	97.4	1e-19	Hcr2-0B [Solanum lycopersicum]	Q9LHP4	80.9	4e-15
Unigene10289_Taxus	579	50	7.4653	--	--	--	--	--	--	--
Unigene1028_Taxus	203	3	1.2776	--	--	--	--	--	--	--
Unigene10290_Taxus	550	75	11.7883	gi|2316016|gb|AAC49791.1|	139	2e-32	MRP-like ABC transporter [Arabidopsis thaliana]	Q9LK64	139	8e-33
Unigene10291_Taxus	321	19	5.1168	--	--	--	--	--	--	--
Unigene10292_Taxus	289	44	13.1616	--	--	--	--	--	--	--
Unigene10293_Taxus	750	75	8.6448	gi|21700765|gb|AAG38144.1|	158	1e-37	phosphoglycerate mutase-like protein [Glycine max]	--	--	--
Unigene10294_Taxus	1352	358	22.8907	gi|15237245|ref|NP_197105.1|	169	2e-50	3-oxo-5-alpha-steroid 4-dehydrogenase family protein / steroid 5-alpha-reductase family protein [Arabidopsis thaliana] >gi|14190513|gb|AAK55737.1|AF380656_1 AT5g16010/F1N13_150 [Arabidopsis thaliana] >gi|9755647|emb|CAC01800.1| steroid 5alpha-reductase-like protein [Arabidopsis thaliana] >gi|24797018|gb|AAN64521.1| At5g16010/F1N13_150 [Arabidopsis thaliana]	P18405	89.4	5e-17
Unigene10295_Taxus	755	83	9.5035	gi|115483971|ref|NP_001065647.1|	74.3	2e-12	Os11g0129800 [Oryza sativa (japonica cultivar-group)] >gi|113644351|dbj|BAF27492.1| Os11g0129800 [Oryza sativa Japonica Group]	--	--	--
Unigene10296_Taxus	1187	240	17.4789	gi|107738372|gb|ABF83685.1|	60.8	6e-08	At2g42760 [Arabidopsis thaliana]	--	--	--
Unigene10297_Taxus	726	44	5.2393	--	--	--	--	--	--	--
Unigene10298_Taxus	306	11	3.1076	gi|148909550|gb|ABR17869.1|	63.9	9e-10	unknown [Picea sitchensis]	--	--	--
Unigene10299_Taxus	465	19	3.5323	--	--	--	--	--	--	--
Unigene1029_Taxus	661	556	72.7155	gi|10177638|dbj|BAB10911.1|	216	3e-55	receptor protein kinase [Arabidopsis thaliana] >gi|224589711|gb|ACN59387.1| leucine-rich repeat receptor-like protein kinase [Arabidopsis thaliana]	Q9SGP2	196	1e-49
Unigene102_Taxus	684	793	100.224	gi|116310227|emb|CAH67236.1|	158	1e-37	OSIGBa0140O07.4 [Oryza sativa (indica cultivar-group)]	--	--	--
Unigene10300_Taxus	883	64	6.2657	gi|18410243|ref|NP_565052.1|	141	7e-51	phosphatase [Arabidopsis thaliana] >gi|133778814|gb|ABO38747.1| At1g73010 [Arabidopsis thaliana]	Q6DBV4	59.3	5e-18
Unigene10301_Taxus	248	10	3.4858	--	--	--	--	--	--	--
Unigene10302_Taxus	425	25	5.0852	gi|115483618|ref|NP_001065479.1|	39.7	7e-06	Os10g0575200 [Oryza sativa (japonica cultivar-group)] >gi|113640011|dbj|BAF27316.1| Os10g0575200 [Oryza sativa Japonica Group]	--	--	--
Unigene10303_Taxus	234	12	4.4332	--	--	--	--	--	--	--
Unigene10304_Taxus	591	78	11.4093	--	--	--	--	--	--	--
Unigene10305_Taxus	259	4	1.3351	gi|115468038|ref|NP_001057618.1|	79.3	3e-26	Os06g0470800 [Oryza sativa (japonica cultivar-group)] >gi|113595658|dbj|BAF19532.1| Os06g0470800 [Oryza sativa Japonica Group]	--	--	--
Unigene10306_Taxus	1208	538	38.5007	gi|115487544|ref|NP_001066259.1|	401	1e-110	Os12g0169000 [Oryza sativa (japonica cultivar-group)]	Q67KJ2	158	8e-38
Unigene10307_Taxus	969	135	12.0438	gi|87241459|gb|ABD33317.1|	169	6e-41	Tyrosine protein kinase, active site [Medicago truncatula]	Q922Q2	134	1e-30
Unigene10308_Taxus	377	107	24.5356	gi|195627844|gb|ACG35752.1|	84.3	6e-16	ketol-acid reductoisomerase [Zea mays]	Q01292	80.5	3e-15
Unigene10309_Taxus	1086	942	74.985	gi|115470957|ref|NP_001059077.1|	265	1e-69	Os07g0187700 [Oryza sativa (japonica cultivar-group)] >gi|34394605|dbj|BAC83907.1| transducin / WD-40 repeat protein-like [Oryza sativa Japonica Group] >gi|113610613|dbj|BAF20991.1| Os07g0187700 [Oryza sativa Japonica Group]	Q8GYE0	246	2e-64
Unigene1030_Taxus	363	12	2.8578	gi|18461174|dbj|BAB84371.1|	56.2	2e-25	1,3-beta-glucan synthase component-like [Oryza sativa Japonica Group] >gi|21644609|dbj|BAC01168.1| 1,3-beta-glucan synthase component-like [Oryza sativa Japonica Group]	Q9ZT82	52.8	5e-24
Unigene10310_Taxus	1206	231	16.5584	gi|115460838|ref|NP_001054019.1|	172	1e-75	Os04g0636600 [Oryza sativa (japonica cultivar-group)] >gi|32492176|emb|CAE04163.1| OSJNBb0034I13.6 [Oryza sativa (japonica cultivar-group)] >gi|113565590|dbj|BAF15933.1| Os04g0636600 [Oryza sativa Japonica Group]	--	--	--
Unigene10311_Taxus	228	9	3.4124	gi|110349546|gb|ABG73248.1|	67.4	8e-11	class III HD-Zip protein HDZ34 [Pinus taeda]	Q9ZU11	57.8	2e-08
Unigene10312_Taxus	549	113	17.7934	--	--	--	--	--	--	--
Unigene10313_Taxus	1189	206	14.9775	gi|121556864|gb|ABM60748.1|	345	1e-93	ACC synthase [Picea engelmannii x Picea glauca]	Q00257	310	2e-83
Unigene10314_Taxus	1629	179	9.4992	gi|115481698|ref|NP_001064442.1|	132	2e-29	Os10g0363700 [Oryza sativa (japonica cultivar-group)] >gi|31431566|gb|AAP53324.1| expressed protein [Oryza sativa (japonica cultivar-group)]	P02566	80.1	4e-14
Unigene10315_Taxus	783	80	8.8325	gi|149900503|gb|ABR32183.1|	251	1e-65	peptide transporter [Hakea actites]	Q9LFB8	228	3e-59
Unigene10316_Taxus	299	63	18.2147	gi|47026912|gb|AAT08677.1|	123	1e-27	histone H2A [Hyacinthus orientalis]	P19177	121	1e-27
Unigene10317_Taxus	242	13	4.6439	gi|15228695|ref|NP_191774.1|	72	3e-12	PGP21 (P-GLYCOPROTEIN 21); ATPase, coupled to transmembrane movement of substances [Arabidopsis thaliana] >gi|75335811|sp|Q9M1Q9.1|AB21B_ARATH RecName: Full=ABC transporter B family member 21; Short=ABC transporter ABCB.21; Short=AtABCB21; AltName: Full=Multidrug resistance protein 17; AltName: Full=P-glycoprotein 21 >gi|6899925|emb|CAB71875.1| P-glycoprotein-like proetin [Arabidopsis thaliana]	Q9M1Q9	72	1e-12
Unigene10318_Taxus	302	8	2.29	--	--	--	--	--	--	--
Unigene10319_Taxus	1824	745	35.309	gi|84316715|gb|ABC55716.1|	721	0	beta-mannosidase 3 [Oncidium Gower Ramsey]	Q9LV33	708	0
Unigene1031_Taxus	217	5	1.9919	--	--	--	--	--	--	--
Unigene10320_Taxus	2501	324	11.1991	gi|15227189|ref|NP_182322.1|	476	1e-151	RKF3 (RECEPTOR-LIKE KINASE IN IN FLOWERS 3); kinase/ receptor signaling protein serine/threonine kinase [Arabidopsis thaliana] >gi|75319082|sp|P93050.1|RKF3_ARATH RecName: Full=Probable LRR receptor-like serine/threonine-protein kinase RKF3; AltName: Full=Receptor-like kinase in flowers 3; Flags: Precursor >gi|1785621|emb|CAB06335.1| AtPK2324 [Arabidopsis thaliana] >gi|2465927|gb|AAC50045.1| rece…	Q9LDN1	244	2e-63
Unigene10321_Taxus	232	68	25.3381	gi|148910082|gb|ABR18123.1|	67	1e-10	unknown [Picea sitchensis]	--	--	--
Unigene10322_Taxus	821	48	5.0542	gi|145356881|ref|XP_001422652.1|	67	5e-10	AEC family transporter: auxin efflux [Ostreococcus lucimarinus CCE9901] >gi|144582895|gb|ABP00969.1| AEC family transporter: auxin efflux [Ostreococcus lucimarinus CCE9901]	--	--	--
Unigene10323_Taxus	253	9	3.0752	gi|15232121|ref|NP_186795.1|	59.7	3e-15	MBD9; DNA binding / methyl-CpG binding [Arabidopsis thaliana]	--	--	--
Unigene10324_Taxus	3094	735	20.5362	gi|42566947|ref|NP_193639.2|	979	0	EDR2; lipid binding [Arabidopsis thaliana]	--	--	--
Unigene10325_Taxus	603	22	3.154	--	--	--	--	--	--	--
Unigene10326_Taxus	211	8	3.2776	--	--	--	--	--	--	--
Unigene10327_Taxus	255	15	5.0852	--	--	--	--	--	--	--
Unigene10328_Taxus	453	39	7.4425	gi|17386128|gb|AAL38610.1|AF446877_1	68.9	3e-11	AT3g52740/F3C22_140 [Arabidopsis thaliana] >gi|15450655|gb|AAK96599.1| AT3g52740/F3C22_140 [Arabidopsis thaliana]	--	--	--
Unigene10329_Taxus	1212	242	17.261	gi|45185754|ref|NP_983470.1|	42.7	4e-07	ACR068Wp [Ashbya gossypii ATCC 10895] >gi|44981509|gb|AAS51294.1| ACR068Wp [Ashbya gossypii ATCC 10895]	Q02171	48.5	4e-07
Unigene1032_Taxus	228	3	1.1375	--	--	--	--	--	--	--
Unigene10330_Taxus	990	64	5.5885	gi|63259083|gb|AAY40251.1|	74.7	3e-12	Cys2/His2 zinc-finger transcription factor [Silene latifolia]	--	--	--
Unigene10331_Taxus	3782	582	13.3032	gi|32306491|gb|AAP78929.1|	380	1e-172	At5g38880 [Arabidopsis thaliana]	--	--	--
Unigene10332_Taxus	253	20	6.8338	--	--	--	--	--	--	--
Unigene10333_Taxus	275	23	7.2302	--	--	--	--	--	--	--
Unigene10334_Taxus	702	47	5.7878	gi|154955398|gb|ABS88990.1|	350	2e-95	ch-cobra [Cunninghamia lanceolata]	Q60E70	334	3e-91
Unigene10335_Taxus	265	66	21.5304	--	--	--	--	--	--	--
Unigene10336_Taxus	359	87	20.9497	gi|258644648|dbj|BAI39897.1|	122	2e-27	hAT dimerisation domain-containing protein -like [Oryza sativa Indica Group]	--	--	--
Unigene10337_Taxus	2639	868	28.4337	gi|183979104|emb|CAP08301.1|	433	1e-120	DNA-binding protein [Vitis thunbergii]	Q9XI90	366	1e-100
Unigene10338_Taxus	238	8	2.9058	--	--	--	--	--	--	--
Unigene10339_Taxus	3795	620	14.1232	gi|108861895|sp|Q8H0U8.2|RH42_ARATH	526	0	RecName: Full=DEAD-box ATP-dependent RNA helicase 42 >gi|4836896|gb|AAD30599.1|AC007369_9 Similar to RNA helicases [Arabidopsis thaliana]	Q8H0U8	526	0
Unigene1033_Taxus	3081	427	11.9809	gi|115464817|ref|NP_001056008.1|	180	6e-85	Os05g0510300 [Oryza sativa (japonica cultivar-group)] >gi|113579559|dbj|BAF17922.1| Os05g0510300 [Oryza sativa Japonica Group]	Q9FPS2	231	2e-59
Unigene10340_Taxus	322	25	6.7118	gi|145356881|ref|XP_001422652.1|	75.9	2e-13	AEC family transporter: auxin efflux [Ostreococcus lucimarinus CCE9901] >gi|144582895|gb|ABP00969.1| AEC family transporter: auxin efflux [Ostreococcus lucimarinus CCE9901]	--	--	--
Unigene10341_Taxus	920	178	16.7258	gi|197131570|gb|ACH47303.1|	52.8	3e-09	ribosomal protein S16 [Monsonia vanderietiae]	Q32RP8	41.6	6e-09
Unigene10342_Taxus	223	3	1.163	--	--	--	--	--	--	--
Unigene10343_Taxus	596	182	26.3985	gi|115451467|ref|NP_001049334.1|	101	1e-20	Os03g0209400 [Oryza sativa (japonica cultivar-group)] >gi|108706782|gb|ABF94577.1| Got1-like family protein, expressed [Oryza sativa (japonica cultivar-group)] >gi|113547805|dbj|BAF11248.1| Os03g0209400 [Oryza sativa Japonica Group]	Q9CR60	69.3	2e-11
Unigene10344_Taxus	1403	127	7.8253	gi|87240852|gb|ABD32710.1|	359	7e-98	Tetratricopeptide-like helical [Medicago truncatula]	Q8LDU5	316	3e-85
Unigene10345_Taxus	1140	114	8.6448	gi|115483875|ref|NP_001065599.1|	143	4e-43	Os11g0118600 [Oryza sativa (japonica cultivar-group)] >gi|77548381|gb|ABA91178.1| expressed protein [Oryza sativa (japonica cultivar-group)] >gi|77552855|gb|ABA95651.1| expressed protein [Oryza sativa (japonica cultivar-group)] >gi|113644303|dbj|BAF27444.1| Os11g0118600 [Oryza sativa Japonica Group] >gi|255669990|dbj|BAF29023.2| Os12g0117800 [Oryza sativa Japonica Group]	--	--	--
Unigene10346_Taxus	220	23	9.0377	gi|50593095|gb|AAT79354.1|	103	1e-21	taxane 2-alpha-O-benzoyltransferase [Taxus x media] >gi|57868102|gb|AAW57406.1| taxane 2-alpha-O-benzoyltransferase [Taxus x media]	Q9FPW3	103	4e-22
Unigene10347_Taxus	498	45	7.8115	gi|223452422|gb|ACM89538.1|	101	6e-21	leucine-rich repeat transmembrane protein kinase [Glycine max]	P47735	85.1	2e-16
Unigene10348_Taxus	520	39	6.4836	--	--	--	--	--	--	--
Unigene10349_Taxus	235	11	4.0465	gi|38345564|emb|CAE03442.2|	48.5	1e-12	OSJNBa0032F06.25 [Oryza sativa (japonica cultivar-group)]	--	--	--
Unigene1034_Taxus	364	11	2.6124	gi|148909481|gb|ABR17838.1|	43.1	2e-07	unknown [Picea sitchensis]	Q9SJK9	45.4	6e-06
Unigene10350_Taxus	461	28	5.2506	gi|45387415|gb|AAS60198.1|	130	6e-47	hexokinase 6 [Nicotiana tabacum]	Q2KNB4	118	2e-43
Unigene10351_Taxus	513	32	5.3924	--	--	--	--	--	--	--
Unigene10352_Taxus	406	14	2.981	gi|42570301|ref|NP_850027.2|	52	4e-20	FAD-dependent oxidoreductase family protein [Arabidopsis thaliana]	--	--	--
Unigene10353_Taxus	1992	474	20.5704	gi|145337255|ref|NP_176909.3|	483	1e-173	peptidase [Arabidopsis thaliana]	Q3UVK0	202	1e-53
Unigene10354_Taxus	210	5	2.0583	--	--	--	--	--	--	--
Unigene10355_Taxus	350	13	3.2109	--	--	--	--	--	--	--
Unigene10356_Taxus	241	29	10.4024	--	--	--	--	--	--	--
Unigene10357_Taxus	800	137	14.8042	gi|145282028|gb|ABP49617.1|	117	4e-25	ubiquitin-protein ligase-like protein [Pyrus communis]	Q9ZUU3	95.9	3e-19
Unigene10358_Taxus	207	25	10.4405	--	--	--	--	--	--	--
Unigene10359_Taxus	333	39	10.1245	--	--	--	--	--	--	--
Unigene1035_Taxus	615	121	17.0084	gi|607774|gb|AAA74420.1|	94.7	1e-18	arabinogalactan-like protein [Pinus taeda]	O22126	68.2	4e-11
Unigene10360_Taxus	504	39	6.6894	gi|115480119|ref|NP_001063653.1|	144	2e-38	Os09g0513700 [Oryza sativa (japonica cultivar-group)] >gi|50725348|dbj|BAD34420.1| ribonucleoprotein antigen-like [Oryza sativa Japonica Group] >gi|113631886|dbj|BAF25567.1| Os09g0513700 [Oryza sativa Japonica Group]	Q16560	72.4	1e-12
Unigene10361_Taxus	207	133	55.5437	--	--	--	--	--	--	--
Unigene10362_Taxus	291	5	1.4854	gi|226500890|ref|NP_001148074.1|	57.4	9e-08	WAK1 - OsWAK receptor-like cytoplasmic kinase (OsWAK-RLCK) [Zea mays] >gi|195615638|gb|ACG29649.1| WAK1 - OsWAK receptor-like cytoplasmic kinase (OsWAK-RLCK) [Zea mays]	P0C5E2	56.6	5e-08
Unigene10363_Taxus	284	11	3.3483	--	--	--	--	--	--	--
Unigene10364_Taxus	663	621	80.9714	gi|224108309|ref|XP_002314799.1|	98.2	1e-19	DELLA domain GRAS family transcription factor GAI/RGA1 [Populus trichocarpa] >gi|222863839|gb|EEF00970.1| DELLA domain GRAS family transcription factor GAI/RGA1 [Populus trichocarpa]	Q6EI05	91.7	4e-18
Unigene10365_Taxus	705	80	9.8097	gi|15228204|ref|NP_190345.1|	236	6e-67	transcription regulator/ zinc ion binding [Arabidopsis thaliana]	Q9QXN3	123	1e-27
Unigene10366_Taxus	1539	528	29.6585	--	--	--	--	--	--	--
Unigene10367_Taxus	1641	358	18.8594	gi|224066819|ref|XP_002302231.1|	519	1e-146	iaa-amino acid hydrolase 9 [Populus trichocarpa] >gi|222843957|gb|EEE81504.1| iaa-amino acid hydrolase 9 [Populus trichocarpa]	Q8S9S4	511	1e-144
Unigene10368_Taxus	267	11	3.5615	--	--	--	--	--	--	--
Unigene10369_Taxus	408	25	5.297	gi|18402618|ref|NP_564544.1|	123	3e-41	cytochrome c biogenesis protein family [Arabidopsis thaliana] >gi|75215676|sp|Q9XIA4.1|CCS1_ARATH RecName: Full=Cytochrome c biogenesis protein CCS1, chloroplastic; AltName: Full=C-type cytochrome synthesis protein 1; Flags: Precursor >gi|5430762|gb|AAD43162.1|AC007504_17 Similar to CCS1 [Arabidopsis thaliana]	Q9XIA4	123	1e-41
Unigene1036_Taxus	5004	2307	39.8551	gi|115451545|ref|NP_001049373.1|	136	4e-30	Os03g0214900 [Oryza sativa (japonica cultivar-group)] >gi|108706836|gb|ABF94631.1| expressed protein [Oryza sativa (japonica cultivar-group)] >gi|113547844|dbj|BAF11287.1| Os03g0214900 [Oryza sativa Japonica Group]	Q6YYC0	117	8e-25
Unigene10370_Taxus	1159	92	6.8621	gi|30682979|ref|NP_566477.2|	123	8e-58	ATEXO70D3 (exocyst subunit EXO70 family protein D3); protein binding [Arabidopsis thaliana]	--	--	--
Unigene10371_Taxus	1835	1167	54.9779	gi|255558288|ref|XP_002520171.1|	554	1e-156	ER glycerol-phosphate acyltransferase [Ricinus communis] >gi|223540663|gb|EEF42226.1| ER glycerol-phosphate acyltransferase [Ricinus communis]	O80437	499	1e-140
Unigene10372_Taxus	1026	142	11.9645	gi|195627916|gb|ACG35788.1|	163	5e-39	retrotransposon protein Ty3-gypsy subclass [Zea mays]	P64956	99	5e-20
Unigene10373_Taxus	2069	652	27.2421	gi|15217473|ref|NP_174595.1|	531	1e-149	fringe-related protein [Arabidopsis thaliana]	--	--	--
Unigene10374_Taxus	712	136	16.5125	gi|18402223|ref|NP_566632.1|	100	2e-20	PUB25 (PLANT U-BOX 25); binding / ubiquitin-protein ligase [Arabidopsis thaliana] >gi|75274077|sp|Q9LT79.1|PUB25_ARATH RecName: Full=U-box domain-containing protein 25; AltName: Full=Plant U-box protein 25 >gi|109134147|gb|ABG25071.1| At3g19380 [Arabidopsis thaliana]	Q9LT79	100	7e-21
Unigene10375_Taxus	1725	201	10.073	gi|115458912|ref|NP_001053056.1|	90.1	1e-16	Os04g0471400 [Oryza sativa (japonica cultivar-group)] >gi|38344753|emb|CAE03057.2| OSJNBa0089K21.11 [Oryza sativa (japonica cultivar-group)] >gi|113564627|dbj|BAF14970.1| Os04g0471400 [Oryza sativa Japonica Group] >gi|116310203|emb|CAH67214.1| H0418A01.7 [Oryza sativa (indica cultivar-group)]	--	--	--
Unigene10376_Taxus	967	91	8.1352	gi|8778496|gb|AAF79504.1|AC002328_12	164	3e-55	F20N2.14 [Arabidopsis thaliana]	Q6K1C4	201	8e-51
Unigene10377_Taxus	312	17	4.7103	gi|13661197|gb|AAK37824.1|AF132120_1	128	1e-47	laccase [Pinus taeda]	Q2QYS3	116	4e-41
Unigene10378_Taxus	294	6	1.7642	gi|15235580|ref|NP_195467.1|	59.7	5e-16	ribonuclease III family protein [Arabidopsis thaliana] >gi|95147308|gb|ABF57289.1| At4g37510 [Arabidopsis thaliana]	--	--	--
Unigene10379_Taxus	295	52	15.2382	--	--	--	--	--	--	--
Unigene1037_Taxus	430	163	32.7697	--	--	--	--	--	--	--
Unigene10380_Taxus	977	606	53.6206	gi|226528334|ref|NP_001149321.1|	391	1e-107	LOC100282944 [Zea mays] >gi|195626372|gb|ACG35016.1| nucleic acid binding protein [Zea mays]	Q0JHZ2	391	1e-108
Unigene10381_Taxus	324	31	8.2712	--	--	--	--	--	--	--
Unigene10382_Taxus	474	20	3.6476	gi|115440905|ref|NP_001044732.1|	77.8	2e-30	Os01g0836600 [Oryza sativa (japonica cultivar-group)] >gi|113534263|dbj|BAF06646.1| Os01g0836600 [Oryza sativa Japonica Group]	Q9ZUT0	80.1	1e-29
Unigene10383_Taxus	379	23	5.2462	gi|148886774|sp|A2XAZ3.1|ADHX_ORYSI	81.6	3e-22	RecName: Full=Alcohol dehydrogenase class-3; AltName: Full=Alcohol dehydrogenase class-III; AltName: Full=S-(hydroxymethyl)glutathione dehydrogenase; AltName: Full=Glutathione-dependent formaldehyde dehydrogenase; Short=GSH-FDH; Short=FALDH; Short=FDH	Q0DWH1	81.6	8e-23
Unigene10384_Taxus	1203	87	6.2518	gi|115459590|ref|NP_001053395.1|	457	1e-127	Os04g0531300 [Oryza sativa (japonica cultivar-group)] >gi|38346764|emb|CAD41143.2| OSJNBa0081C01.15 [Oryza sativa (japonica cultivar-group)] >gi|113564966|dbj|BAF15309.1| Os04g0531300 [Oryza sativa Japonica Group] >gi|116312037|emb|CAJ86402.1| OSIGBa0125M19.5 [Oryza sativa (indica cultivar-group)]	Q9NX74	296	3e-79
Unigene10385_Taxus	389	40	8.8892	--	--	--	--	--	--	--
Unigene10386_Taxus	609	79	11.2141	gi|115457624|ref|NP_001052412.1|	137	2e-34	Os04g0303500 [Oryza sativa (japonica cultivar-group)]	Q39688	92	2e-18
Unigene10387_Taxus	316	76	20.7912	gi|226498348|ref|NP_001148765.1|	125	3e-28	endo-1,3;1,4-beta-D-glucanase [Zea mays] >gi|195621988|gb|ACG32824.1| endo-1,3;1,4-beta-D-glucanase precursor [Zea mays]	Q9ZT66	86.7	4e-17
Unigene10388_Taxus	300	31	8.9329	gi|118490015|gb|ABK96801.1|	114	8e-25	ACRE 276-like protein [Solanum tuberosum]	Q9C7R6	108	1e-23
Unigene10389_Taxus	450	62	11.9106	--	--	--	--	--	--	--
Unigene1038_Taxus	237	6	2.1885	--	--	--	--	--	--	--
Unigene10390_Taxus	270	9	2.8816	--	--	--	--	--	--	--
Unigene10391_Taxus	218	2	0.7931	--	--	--	--	--	--	--
Unigene10392_Taxus	926	75	7.0017	gi|134142842|gb|ABO61742.1|	300	1e-128	trehalose-phosphate synthase 1 [Solanum lycopersicum]	Q9SYM4	301	1e-128
Unigene10393_Taxus	527	31	5.0852	gi|15237038|ref|NP_194456.1|	171	1e-53	WES1; indole-3-acetic acid amido synthetase [Arabidopsis thaliana] >gi|62900128|sp|O81829.1|GH35_ARATH RecName: Full=Indole-3-acetic acid-amido synthetase GH3.5; AltName: Full=Auxin-responsive GH3-like protein 5; Short=AtGH3-5 >gi|3269287|emb|CAA19720.1| GH3 like protein [Arabidopsis thaliana] >gi|7269579|emb|CAB79581.1| GH3 like protein [Arabidopsis thaliana] >gi|98621984|gb|ABF58888.1| auxin-re…	O81829	171	4e-54
Unigene10394_Taxus	2130	444	18.0201	gi|207559705|gb|ACI24355.1|	72	9e-20	F-box DOT [Solanum pimpinellifolium]	Q9FHS6	72.8	4e-19
Unigene10395_Taxus	997	160	13.8733	gi|42570337|ref|NP_850144.2|	68.2	3e-10	OFP17 (ARABIDOPSIS THALIANA OVATE FAMILY PROTEIN 17) [Arabidopsis thaliana]	--	--	--
Unigene10396_Taxus	2906	1148	34.1507	gi|15240634|ref|NP_199832.1|	839	0	QS (QUINOLINATE SYNTHASE); 4 iron, 4 sulfur cluster binding / enzyme activator/ protein homodimerization/ quinolinate synthetase A [Arabidopsis thaliana]	P74523	81.6	3e-14
Unigene10397_Taxus	571	48	7.2671	gi|115461955|ref|NP_001054577.1|	152	4e-36	Os05g0135900 [Oryza sativa (japonica cultivar-group)] >gi|113578128|dbj|BAF16491.1| Os05g0135900 [Oryza sativa Japonica Group]	Q9BMM8	50.4	7e-06
Unigene10398_Taxus	467	32	5.9236	--	--	--	--	--	--	--
Unigene10399_Taxus	413	49	10.2565	--	--	--	--	--	--	--
Unigene1039_Taxus	425	22	4.4749	gi|42408816|dbj|BAD10077.1|	68.2	5e-11	lectin-like protein kinase-like [Oryza sativa Japonica Group]	P29257	68.6	1e-11
Unigene103_Taxus	451	140	26.8352	--	--	--	--	--	--	--
Unigene10400_Taxus	368	64	15.0344	--	--	--	--	--	--	--
Unigene10401_Taxus	1077	196	15.7324	gi|54695178|dbj|BAD67154.1|	108	6e-47	PpPPR_91 [Physcomitrella patens]	Q9SIT7	116	2e-43
Unigene10402_Taxus	294	1318	387.545	--	--	--	--	--	--	--
Unigene10403_Taxus	568	24	3.6527	--	--	--	--	--	--	--
Unigene10404_Taxus	2096	555	22.8905	gi|224083342|ref|XP_002306988.1|	609	1e-173	glutamate-gated kainate-type ion channel receptor subunit GluR5 [Populus trichocarpa] >gi|222856437|gb|EEE93984.1| glutamate-gated kainate-type ion channel receptor subunit GluR5 [Populus trichocarpa]	Q7XP59	595	1e-169
Unigene10405_Taxus	371	26	6.0583	gi|225454979|ref|XP_002278113.1|	67.8	6e-11	PREDICTED: similar to MIM (HYPERSENSITIVE TO MMS, IRRADIATION AND MMC); ATP binding [Vitis vinifera]	--	--	--
Unigene10406_Taxus	271	5	1.595	--	--	--	--	--	--	--
Unigene10407_Taxus	1183	348	25.4301	gi|223452504|gb|ACM89579.1|	65.1	3e-09	protein kinase family protein [Glycine max]	--	--	--
Unigene10408_Taxus	253	535	182.804	--	--	--	--	--	--	--
Unigene10409_Taxus	906	67	6.3929	gi|167342220|gb|ABZ69058.1|	128	1e-28	cathechol O-methyltransferase [Pinus sylvestris]	P22734	129	3e-29
Unigene1040_Taxus	439	151	29.7349	--	--	--	--	--	--	--
Unigene10410_Taxus	233	14	5.1943	gi|255550247|ref|XP_002516174.1|	44.7	1e-05	ubiquitin-protein ligase, putative [Ricinus communis] >gi|223544660|gb|EEF46176.1| ubiquitin-protein ligase, putative [Ricinus communis]	--	--	--
Unigene10411_Taxus	1309	340	22.454	gi|115479401|ref|NP_001063294.1|	281	2e-74	Os09g0442900 [Oryza sativa (japonica cultivar-group)] >gi|113631527|dbj|BAF25208.1| Os09g0442900 [Oryza sativa Japonica Group]	Q8W486	142	5e-33
Unigene10412_Taxus	789	147	16.1062	gi|115450889|ref|NP_001049045.1|	78.2	2e-13	Os03g0161600 [Oryza sativa (japonica cultivar-group)] >gi|113547516|dbj|BAF10959.1| Os03g0161600 [Oryza sativa Japonica Group]	Q7M1E7	68.2	6e-11
Unigene10413_Taxus	242	9	3.215	--	--	--	--	--	--	--
Unigene10414_Taxus	251	8	2.7553	--	--	--	--	--	--	--
Unigene10415_Taxus	562	154	23.6885	gi|225469780|ref|XP_002272554.1|	105	5e-22	PREDICTED: similar to heat shock protein binding [Vitis vinifera]	--	--	--
Unigene10416_Taxus	225	3	1.1526	--	--	--	--	--	--	--
Unigene10417_Taxus	1020	132	11.1874	gi|115481698|ref|NP_001064442.1|	88.2	3e-16	Os10g0363700 [Oryza sativa (japonica cultivar-group)] >gi|31431566|gb|AAP53324.1| expressed protein [Oryza sativa (japonica cultivar-group)]	--	--	--
Unigene10418_Taxus	2410	554	19.8722	gi|17064896|gb|AAL32602.1|	846	0	Unknown protein [Arabidopsis thaliana]	Q54XC1	228	1e-58
Unigene10419_Taxus	300	54	15.5606	--	--	--	--	--	--	--
Unigene1041_Taxus	1778	552	26.8387	gi|225423855|ref|XP_002281154.1|	419	1e-134	PREDICTED: similar to CHUP1 (CHLOROPLAST UNUSUAL POSITIONING 1) [Vitis vinifera]	Q9LI74	410	1e-131
Unigene10420_Taxus	427	24	4.8589	--	--	--	--	--	--	--
Unigene10421_Taxus	365	35	8.2895	gi|270235200|emb|CBI24330.1|	51.6	5e-06	unnamed protein product [Vitis vinifera]	--	--	--
Unigene10422_Taxus	233	3	1.1131	--	--	--	--	--	--	--
Unigene10423_Taxus	591	56	8.1913	--	--	--	--	--	--	--
Unigene10424_Taxus	1121	293	22.5952	gi|106880176|emb|CAJ80770.1|	224	1e-102	red chlorophyll catabolite reductase [Pinus taeda]	Q8LDU4	113	5e-40
Unigene10425_Taxus	637	56	7.5998	gi|51536590|gb|AAU05533.1|	199	4e-50	At4g04320 [Arabidopsis thaliana]	O95822	102	1e-35
Unigene10426_Taxus	2888	660	19.7561	gi|115469240|ref|NP_001058219.1|	305	4e-81	Os06g0649800 [Oryza sativa (japonica cultivar-group)]	Q7VG78	190	4e-47
Unigene10427_Taxus	276	13	4.0718	gi|116309786|emb|CAH66826.1|	72.8	2e-12	OSIGBa0148A10.3 [Oryza sativa (indica cultivar-group)]	--	--	--
Unigene10428_Taxus	1145	124	9.362	gi|30699384|ref|NP_178023.2|	68.2	2e-16	transcription factor-related [Arabidopsis thaliana]	--	--	--
Unigene10429_Taxus	657	48	6.3158	--	--	--	--	--	--	--
Unigene1042_Taxus	356	85	20.6406	--	--	--	--	--	--	--
Unigene10430_Taxus	255	12	4.0681	gi|15237421|ref|NP_197188.1|	63.5	1e-09	pentatricopeptide (PPR) repeat-containing protein [Arabidopsis thaliana] >gi|75174141|sp|Q9LFL5.1|PP390_ARATH RecName: Full=Pentatricopeptide repeat-containing protein At5g16860	Q9LFL5	63.5	4e-10
Unigene10431_Taxus	406	37	7.8782	gi|15242811|ref|NP_195981.1|	61.2	6e-09	GDSL-motif lipase/hydrolase family protein [Arabidopsis thaliana] >gi|75181338|sp|Q9LZS7.1|GDL71_ARATH RecName: Full=GDSL esterase/lipase At5g03610; AltName: Full=Extracellular lipase At5g03610; Flags: Precursor	Q9LZS7	61.2	2e-09
Unigene10432_Taxus	244	6	2.1258	--	--	--	--	--	--	--
Unigene10433_Taxus	281	29	8.9217	--	--	--	--	--	--	--
Unigene10434_Taxus	417	43	8.9143	gi|222422925|dbj|BAH19449.1|	112	3e-24	AT2G27900 [Arabidopsis thaliana]	--	--	--
Unigene10435_Taxus	229	3	1.1325	--	--	--	--	--	--	--
Unigene10436_Taxus	265	10	3.2622	--	--	--	--	--	--	--
Unigene10437_Taxus	679	112	14.2594	--	--	--	--	--	--	--
Unigene10438_Taxus	611	17	2.4053	gi|15217493|ref|NP_177302.1|	68.6	9e-11	pentatricopeptide (PPR) repeat-containing protein [Arabidopsis thaliana] >gi|75169718|sp|Q9C9I3.1|PP115_ARATH RecName: Full=Pentatricopeptide repeat-containing protein At1g71460, chloroplastic; Flags: Precursor	Q9C9I3	68.6	3e-11
Unigene10439_Taxus	240	2	0.7204	gi|197307278|gb|ACH59990.1|	105	2e-22	glutathione S-transferase [Pseudotsuga menziesii]	P42761	81.3	2e-15
Unigene1043_Taxus	468	38	7.0193	gi|255544264|ref|XP_002513194.1|	68.9	3e-11	cohesin subunit rad21, putative [Ricinus communis] >gi|223547692|gb|EEF49185.1| cohesin subunit rad21, putative [Ricinus communis]	--	--	--
Unigene10440_Taxus	345	31	7.7678	gi|53690150|gb|AAU89979.1|	83.6	1e-15	taxoid-O-acetyltransferase [Taxus cuspidata]	Q8LL69	61.6	1e-09
Unigene10441_Taxus	265	29	9.4603	--	--	--	--	--	--	--
Unigene10442_Taxus	533	48	7.7852	--	--	--	--	--	--	--
Unigene10443_Taxus	215	16	6.4333	--	--	--	--	--	--	--
Unigene10444_Taxus	981	95	8.3716	gi|157101256|dbj|BAF79959.1|	85.1	2e-15	receptor-like kinase [Marchantia polymorpha]	--	--	--
Unigene10445_Taxus	335	70	18.0637	--	--	--	--	--	--	--
Unigene10446_Taxus	1155	310	23.2024	gi|115467806|ref|NP_001057502.1|	226	8e-58	Os06g0318300 [Oryza sativa (japonica cultivar-group)] >gi|113595542|dbj|BAF19416.1| Os06g0318300 [Oryza sativa Japonica Group]	Q9SFC6	224	7e-58
Unigene10447_Taxus	1632	652	34.5367	gi|133907524|gb|ABO42262.1|	203	4e-65	AT-hook DNA-binding protein [Gossypium hirsutum]	Q9S7C9	80.1	5e-15
Unigene10448_Taxus	274	108	34.0743	--	--	--	--	--	--	--
Unigene10449_Taxus	539	168	26.9447	--	--	--	--	--	--	--
Unigene1044_Taxus	369	6	1.4057	--	--	--	--	--	--	--
Unigene10450_Taxus	402	17	3.6557	--	--	--	--	--	--	--
Unigene10451_Taxus	826	84	8.7913	--	--	--	--	--	--	--
Unigene10452_Taxus	265	7	2.2835	--	--	--	--	--	--	--
Unigene10453_Taxus	276	6	1.8793	--	--	--	--	--	--	--
Unigene10454_Taxus	335	10	2.5805	gi|44921725|gb|AAS49213.1|	93.2	1e-18	disease resistance protein [Glycine max]	Q9LRR5	86.3	5e-17
Unigene10455_Taxus	948	148	13.4961	gi|3335347|gb|AAC27149.1|	78.6	2e-13	Contains similarity to ARI, RING finger protein gb|X98309 from Drosophila melanogaster. ESTs gb|T44383, gb|W43120, gb|N65868, gb|H36013, gb|AA042241, gb|T76869 and gb|AA042359 come from this gene [Arabidopsis thaliana]	Q8W468	78.6	6e-14
Unigene10456_Taxus	268	79	25.4827	--	--	--	--	--	--	--
Unigene10457_Taxus	489	28	4.95	gi|56603657|dbj|BAD80749.1|	185	1e-55	myosin class 11-2 [Adiantum capillus-veneris]	P21271	53.5	6e-07
Unigene10458_Taxus	254	3	1.021	--	--	--	--	--	--	--
Unigene10459_Taxus	6271	2022	27.8739	gi|256674139|gb|ACV04899.1|	2402	0	callose synthase 10 [Arabidopsis thaliana]	Q9SJM0	2391	0
Unigene1045_Taxus	245	3	1.0585	gi|224090425|ref|XP_002308984.1|	48.5	1e-06	predicted protein [Populus trichocarpa] >gi|222854960|gb|EEE92507.1| predicted protein [Populus trichocarpa]	--	--	--
Unigene10460_Taxus	2369	962	35.1046	gi|226502156|ref|NP_001147894.1|	668	0	CSLE6 - cellulose synthase-like family E [Zea mays] >gi|195614436|gb|ACG29048.1| CSLE6 - cellulose synthase-like family E [Zea mays]	Q651X6	650	0
Unigene10461_Taxus	1485	298	17.3478	gi|168029501|ref|XP_001767264.1|	637	0	condensin complex component SMC1 [Physcomitrella patens subsp. patens] >gi|162681519|gb|EDQ67945.1| condensin complex component SMC1 [Physcomitrella patens subsp. patens]	O93308	365	1e-100
Unigene10462_Taxus	311	242	67.268	gi|115439863|ref|NP_001044211.1|	197	7e-50	Os01g0742200 [Oryza sativa (japonica cultivar-group)] >gi|113533742|dbj|BAF06125.1| Os01g0742200 [Oryza sativa Japonica Group]	O23755	192	4e-49
Unigene10463_Taxus	2299	1176	44.2203	gi|19310469|gb|AAL84969.1|	266	1e-69	AT5g20600/F7C8_190 [Arabidopsis thaliana] >gi|28416463|gb|AAO42762.1| At5g20600/F7C8_190 [Arabidopsis thaliana]	Q14684	145	2e-33
Unigene10464_Taxus	682	70	8.8729	--	--	--	--	--	--	--
Unigene10465_Taxus	1794	169	8.1436	gi|145358264|ref|NP_197532.3|	311	1e-121	DCL4 (DICER-LIKE 4); RNA binding / protein binding / ribonuclease III [Arabidopsis thaliana] >gi|73672051|gb|AAZ80387.1| dicer-like 4 [Arabidopsis thaliana]	P84634	243	1e-101
Unigene10466_Taxus	545	34	5.3931	gi|15218042|ref|NP_173506.1|	83.2	3e-15	zinc finger (C3HC4-type RING finger) family protein [Arabidopsis thaliana] >gi|68565308|sp|Q9LM69.1|ATL1B_ARATH RecName: Full=RING-H2 finger protein ATL1B >gi|8886938|gb|AAF80624.1|AC069251_17 F2D10.34 [Arabidopsis thaliana]	Q9LM69	83.2	9e-16
Unigene10467_Taxus	442	73	14.2776	--	--	--	--	--	--	--
Unigene10468_Taxus	230	21	7.8931	--	--	--	--	--	--	--
Unigene10469_Taxus	1435	328	19.7595	gi|115477308|ref|NP_001062250.1|	164	4e-39	Os08g0518200 [Oryza sativa (japonica cultivar-group)] >gi|113624219|dbj|BAF24164.1| Os08g0518200 [Oryza sativa Japonica Group]	--	--	--
Unigene1046_Taxus	208	0	0	--	--	--	--	--	--	--
Unigene10470_Taxus	1626	178	9.4635	gi|30686087|ref|NP_567679.2|	241	3e-85	CRK10 (CYSTEINE-RICH RLK10); ATP binding / kinase/ protein kinase/ protein serine/threonine kinase/ protein tyrosine kinase [Arabidopsis thaliana] >gi|29029020|gb|AAO64889.1| At4g23180 [Arabidopsis thaliana]	Q8GYA4	241	9e-86
Unigene10471_Taxus	355	35	8.523	--	--	--	--	--	--	--
Unigene10472_Taxus	678	98	12.4954	gi|75337761|sp|Q9SW44.1|RH16_ARATH	256	3e-67	RecName: Full=DEAD-box ATP-dependent RNA helicase 16 >gi|5123708|emb|CAB45452.1| RNA helicase (RH16) [Arabidopsis thaliana] >gi|7270442|emb|CAB80208.1| RNA helicase (RH16) [Arabidopsis thaliana]	Q9SW44	256	9e-68
Unigene10473_Taxus	264	12	3.9294	--	--	--	--	--	--	--
Unigene10474_Taxus	666	80	10.3841	--	--	--	--	--	--	--
Unigene10475_Taxus	271	12	3.8279	--	--	--	--	--	--	--
Unigene10476_Taxus	462	19	3.5552	gi|255584725|ref|XP_002533083.1|	39.7	1e-06	conserved hypothetical protein [Ricinus communis] >gi|223527122|gb|EEF29298.1| conserved hypothetical protein [Ricinus communis]	--	--	--
Unigene10477_Taxus	242	8	2.8578	gi|115472839|ref|NP_001060018.1|	52	4e-06	Os07g0566800 [Oryza sativa (japonica cultivar-group)] >gi|33146760|dbj|BAC79671.1| TIR/P-loop/LRR disease resistance protein-like protein [Oryza sativa Japonica Group] >gi|34393285|dbj|BAC83199.1| TIR/P-loop/LRR disease resistance protein-like protein [Oryza sativa Japonica Group] >gi|113611554|dbj|BAF21932.1| Os07g0566800 [Oryza sativa Japonica Group]	--	--	--
Unigene10478_Taxus	473	13	2.3759	--	--	--	--	--	--	--
Unigene10479_Taxus	2860	368	11.1233	gi|225446426|ref|XP_002276115.1|	801	0	PREDICTED: similar to haloacid dehalogenase-like hydrolase family protein [Vitis vinifera]	P98205	776	0
Unigene1047_Taxus	265	169	55.1308	gi|226235458|dbj|BAH47641.1|	80.9	7e-15	progesterone 5beta reductase-B [Nicotiana tabacum]	--	--	--
Unigene10480_Taxus	251	23	7.9215	--	--	--	--	--	--	--
Unigene10481_Taxus	441	39	7.645	gi|15242391|ref|NP_197082.1|	85.1	4e-16	pollen Ole e 1 allergen and extensin family protein [Arabidopsis thaliana] >gi|9755623|emb|CAC01777.1| proline-rich protein [Arabidopsis thaliana] >gi|27311645|gb|AAO00788.1| proline-rich protein [Arabidopsis thaliana] >gi|53828649|gb|AAU94434.1| At5g15780 [Arabidopsis thaliana]	Q5RBM8	83.2	5e-16
Unigene10482_Taxus	253	3	1.0251	gi|255955253|ref|XP_002568379.1|	87.8	3e-24	Pc21g13620 [Penicillium chrysogenum Wisconsin 54-1255] >gi|211590090|emb|CAP96259.1| Pc21g13620 [Penicillium chrysogenum Wisconsin 54-1255]	P25443	75.1	1e-18
Unigene10483_Taxus	310	6	1.6732	--	--	--	--	--	--	--
Unigene10484_Taxus	2332	878	32.5476	gi|255557353|ref|XP_002519707.1|	776	0	50 kDa ketoavyl-ACP synthase [Ricinus communis] >gi|294668|gb|AAA33873.1| chloroplast beta-ketoacyl-ACP synthase precursor [Ricinus communis] >gi|148791249|gb|ABR12416.1| plastid 3-keto-acyl-ACP synthase I [Ricinus communis] >gi|223541124|gb|EEF42680.1| 50 kDa ketoavyl-ACP synthase [Ricinus communis]	P52410	757	0
Unigene10485_Taxus	243	58	20.6336	--	--	--	--	--	--	--
Unigene10486_Taxus	1290	502	33.6409	gi|18401896|ref|NP_565678.1|	200	7e-50	CXIP4 (CAX INTERACTING PROTEIN 4); nucleic acid binding / zinc ion binding [Arabidopsis thaliana] >gi|122063426|sp|Q84Y18.2|CXIP4_ARATH RecName: Full=CAX-interacting protein 4 >gi|16226661|gb|AAL16226.1|AF428457_1 At2g28910/F8N16.20 [Arabidopsis thaliana] >gi|3927838|gb|AAC79595.1| expressed protein [Arabidopsis thaliana] >gi|22655466|gb|AAM98325.1| At2g28910/F8N16.20 [Arabidopsis thaliana]	Q84Y18	200	2e-50
Unigene10487_Taxus	1126	254	19.5006	gi|224060381|ref|XP_002300171.1|	139	1e-39	high mobility group family [Populus trichocarpa] >gi|222847429|gb|EEE84976.1| high mobility group family [Populus trichocarpa]	Q9DC33	67.4	2e-10
Unigene10488_Taxus	242	11	3.9294	--	--	--	--	--	--	--
Unigene10489_Taxus	247	11	3.8499	--	--	--	--	--	--	--
Unigene1048_Taxus	435	23	4.5708	--	--	--	--	--	--	--
Unigene10490_Taxus	2398	784	28.2631	gi|15234357|ref|NP_192096.1|	581	1e-164	tolB protein-related [Arabidopsis thaliana]	B3CUF6	71.2	3e-11
Unigene10491_Taxus	348	117	29.0643	gi|559557|gb|AAA51649.1|	62	3e-09	arabinogalactan-protein [Pyrus communis]	Q8LG54	54.3	2e-07
Unigene10492_Taxus	936	519	47.9341	gi|148908629|gb|ABR17423.1|	165	1e-39	unknown [Picea sitchensis]	--	--	--
Unigene10493_Taxus	247	5	1.75	gi|9454534|gb|AAF87857.1|AC022520_1	75.1	4e-13	Hypothetical protein [Arabidopsis thaliana]	--	--	--
Unigene10494_Taxus	665	92	11.9597	gi|224284251|gb|ACN39861.1|	70.5	3e-11	unknown [Picea sitchensis]	--	--	--
Unigene10495_Taxus	3082	671	18.821	gi|186530845|ref|NP_001119403.1|	65.1	1e-08	CPuORF37 (Conserved peptide upstream open reading frame 37) [Arabidopsis thaliana]	--	--	--
Unigene10496_Taxus	2936	893	26.2935	gi|18414444|ref|NP_567464.1|	679	0	ATB' GAMMA; poly(U) binding / protein phosphatase type 2A regulator [Arabidopsis thaliana] >gi|30683249|ref|NP_849390.1| ATB' GAMMA; poly(U) binding / protein phosphatase type 2A regulator [Arabidopsis thaliana] >gi|85680893|sp|Q8RW96.2|2A5G_ARATH RecName: Full=Serine/threonine protein phosphatase 2A 59 kDa regulatory subunit B' gamma isoform; Short=PP2A, B' subunit, gamma isoform; Short=AtB' gam…	Q8RW96	679	0
Unigene10497_Taxus	228	16	6.0665	gi|29028946|gb|AAO64852.1|	80.5	9e-15	At1g35220 [Arabidopsis thaliana]	--	--	--
Unigene10498_Taxus	268	13	4.1934	gi|238055377|sp|B9IH36.1|U4975_POPTR	55.5	3e-07	RecName: Full=UPF0497 membrane protein 5	B9IH36	55.5	1e-07
Unigene10499_Taxus	245	40	14.1139	--	--	--	--	--	--	--
Unigene1049_Taxus	890	479	46.5264	gi|75337714|sp|Q9SVG9.1|CML42_ARATH	182	1e-44	RecName: Full=Calcium-binding protein CML42; AltName: Full=Calmodulin-like protein 42 >gi|5262218|emb|CAB45844.1| calcium-binding protein-like [Arabidopsis thaliana] >gi|7268874|emb|CAB79078.1| calcium-binding protein-like [Arabidopsis thaliana] >gi|28372940|gb|AAO39952.1| At4g20780 [Arabidopsis thaliana]	Q9SVG9	182	3e-45
Unigene104_Taxus	1085	663	52.8247	gi|226531508|ref|NP_001149014.1|	257	3e-67	rhodanese-like domain containing protein [Zea mays] >gi|195610936|gb|ACG27298.1| rhodanese-like domain containing protein [Zea mays] >gi|195624004|gb|ACG33832.1| rhodanese-like domain containing protein [Zea mays]	Q39129	54.3	1e-06
Unigene10500_Taxus	257	14	4.7092	gi|18406260|ref|NP_564732.1|	54.7	2e-16	ZW18 [Arabidopsis thaliana] >gi|186491769|ref|NP_001117514.1| ZW18 [Arabidopsis thaliana] >gi|8979939|gb|AAF82253.1|AC008051_4 Identical to gene ZW18 from Arabidopsis thaliana gb|AB028199 >gi|6520167|dbj|BAA87940.1| ZW18 [Arabidopsis thaliana]	--	--	--
Unigene10501_Taxus	356	24	5.8279	gi|164604830|dbj|BAF98467.1|	118	3e-26	cytochrome P450 [Coptis japonica var. dissecta]	Q50EK4	102	7e-22
Unigene10502_Taxus	306	25	7.0627	gi|223635653|sp|B3H4P1.1|PP450_ARATH	86.7	1e-16	RecName: Full=Pentatricopeptide repeat-containing protein At5g66631	B3H4P1	86.7	4e-17
Unigene10503_Taxus	772	63	7.0547	--	--	--	--	--	--	--
Unigene10504_Taxus	306	8	2.2601	--	--	--	--	--	--	--
Unigene10505_Taxus	494	130	22.7494	gi|239056193|emb|CAQ58630.1|	75.5	4e-13	Unknown gene [Vitis vinifera]	--	--	--
Unigene10506_Taxus	291	109	32.3808	--	--	--	--	--	--	--
Unigene10507_Taxus	419	222	45.8028	gi|115469508|ref|NP_001058353.1|	161	4e-39	Os06g0676700 [Oryza sativa (japonica cultivar-group)] >gi|113596393|dbj|BAF20267.1| Os06g0676700 [Oryza sativa Japonica Group]	Q653V7	160	2e-39
Unigene10508_Taxus	363	36	8.5733	--	--	--	--	--	--	--
Unigene10509_Taxus	1869	322	14.8936	gi|79324537|ref|NP_001031499.1|	525	1e-147	kinase [Arabidopsis thaliana] >gi|224589545|gb|ACN59306.1| leucine-rich repeat receptor-like protein kinase [Arabidopsis thaliana]	Q8L4H4	328	8e-89
Unigene1050_Taxus	211	3	1.2291	--	--	--	--	--	--	--
Unigene10510_Taxus	1755	315	15.5163	gi|115441673|ref|NP_001045116.1|	545	1e-153	Os01g0902200 [Oryza sativa (japonica cultivar-group)] >gi|113534647|dbj|BAF07030.1| Os01g0902200 [Oryza sativa Japonica Group]	P42676	407	1e-115
Unigene10511_Taxus	744	98	11.3869	--	--	--	--	--	--	--
Unigene10512_Taxus	284	48	14.6109	--	--	--	--	--	--	--
Unigene10513_Taxus	486	9	1.6009	--	--	--	--	--	--	--
Unigene10514_Taxus	795	346	37.6238	gi|14423428|gb|AAK62396.1|AF386951_1	56.2	7e-07	Unknown protein [Arabidopsis thaliana]	--	--	--
Unigene10515_Taxus	2318	459	17.118	gi|14041825|dbj|BAB55002.1|	638	0	nitrate reductase [Prunus persica]	P39867	653	0
Unigene10516_Taxus	1588	812	44.2037	gi|82502216|gb|ABB80136.1|	746	0	sucrose-phosphatase 1 [Ginkgo biloba]	Q5IH14	560	1e-159
Unigene10517_Taxus	269	9	2.8923	--	--	--	--	--	--	--
Unigene10518_Taxus	248	2	0.6972	--	--	--	--	--	--	--
Unigene10519_Taxus	255	2	0.678	gi|15226299|ref|NP_178260.1|	58.9	1e-15	pentatricopeptide (PPR) repeat-containing protein [Arabidopsis thaliana] >gi|75216969|sp|Q9ZVF4.1|PP140_ARATH RecName: Full=Pentatricopeptide repeat-containing protein At2g01510, mitochondrial; Flags: Precursor	Q9ZVF4	58.9	3e-16
Unigene1051_Taxus	243	5	1.7788	gi|15221566|ref|NP_177059.1|	46.6	4e-07	pentatricopeptide (PPR) repeat-containing protein [Arabidopsis thaliana] >gi|75333633|sp|Q9CAA8.1|PP108_ARATH RecName: Full=Putative pentatricopeptide repeat-containing protein At1g68930	Q9CAA8	46.6	1e-07
Unigene10520_Taxus	236	18	6.5935	gi|115445805|ref|NP_001046682.1|	105	3e-22	Os02g0319800 [Oryza sativa (japonica cultivar-group)] >gi|113536213|dbj|BAF08596.1| Os02g0319800 [Oryza sativa Japonica Group]	Q64LD2	75.5	9e-14
Unigene10521_Taxus	770	57	6.3994	--	--	--	--	--	--	--
Unigene10522_Taxus	247	15	5.2499	--	--	--	--	--	--	--
Unigene10523_Taxus	1262	234	16.0291	gi|115481056|ref|NP_001064121.1|	182	3e-81	Os10g0135600 [Oryza sativa (japonica cultivar-group)]	O35678	62.8	5e-09
Unigene10524_Taxus	260	26	8.6448	--	--	--	--	--	--	--
Unigene10525_Taxus	602	52	7.4672	gi|67462313|gb|AAY67884.1|	191	2e-68	argonaute/Zwille-like protein [Picea glauca]	Q0JF58	137	3e-45
Unigene10526_Taxus	259	1611	537.712	--	--	--	--	--	--	--
Unigene10527_Taxus	265	25	8.1554	--	--	--	--	--	--	--
Unigene10528_Taxus	229	6	2.265	--	--	--	--	--	--	--
Unigene10529_Taxus	1929	403	18.0604	gi|124360795|gb|ABN08767.1|	387	1e-106	Amine oxidase [Medicago truncatula]	Q9SU79	367	1e-100
Unigene1052_Taxus	1355	709	45.2335	gi|144905064|dbj|BAF56419.1|	194	5e-48	YABBY2 like protein [Ruscus aculeatus]	Q8GW46	174	1e-42
Unigene10530_Taxus	253	10	3.4169	--	--	--	--	--	--	--
Unigene10531_Taxus	791	142	15.5191	gi|62287140|sp|Q9ZP19.1|PPO1_IPOBA	68.9	1e-10	RecName: Full=Polyphenol oxidase I, chloroplastic; Short=PPO-I; AltName: Full=Catechol oxidase I >gi|4158170|emb|CAA06855.1| catechol oxidase; polyphenol oxidase [Ipomoea batatas]	Q9ZP19	68.9	4e-11
Unigene10532_Taxus	501	43	7.4197	--	--	--	--	--	--	--
Unigene10533_Taxus	651	40	5.3117	gi|21703131|gb|AAM74506.1|	47	2e-07	AT5g16250/T21H19_170 [Arabidopsis thaliana] >gi|23505791|gb|AAN28755.1| At5g16250/T21H19_170 [Arabidopsis thaliana]	--	--	--
Unigene10534_Taxus	434	17	3.3862	--	--	--	--	--	--	--
Unigene10535_Taxus	543	201	32	gi|18412959|ref|NP_567300.1|	115	5e-25	IBR1 (INDOLE-3-BUTYRIC ACID RESPONSE 1); binding / catalytic/ oxidoreductase [Arabidopsis thaliana] >gi|5732060|gb|AAD48959.1|AF147263_1 contains similarity to Pfam families PF00106 (short chain dehydrogenase; score=151.7, E=1.3e-41, N=1) and PF00678 (Short chain dehydrogenase/reductase C-terminus; score=48.9, E=1.1e-10, N=1) [Arabidopsis thaliana] >gi|7267313|emb|CAB81095.1| AT4g05530 [Arabidops…	Q9GKX2	74.3	4e-13
Unigene10536_Taxus	257	15	5.0456	--	--	--	--	--	--	--
Unigene10537_Taxus	253	11	3.7586	--	--	--	--	--	--	--
Unigene10538_Taxus	284	37	11.2626	gi|224130858|ref|XP_002320942.1|	77	1e-29	multidrug/pheromone exporter, MDR family, ABC transporter family [Populus trichocarpa] >gi|222861715|gb|EEE99257.1| multidrug/pheromone exporter, MDR family, ABC transporter family [Populus trichocarpa]	Q9M1Q9	75.5	3e-28
Unigene10539_Taxus	513	62	10.4479	gi|19070143|gb|AAL83725.1|AF328842_1	156	3e-40	homeodomain protein HB2 [Picea abies]	Q7Y0V7	144	5e-36
Unigene1053_Taxus	232	8	2.981	--	--	--	--	--	--	--
Unigene10540_Taxus	201	14	6.0212	--	--	--	--	--	--	--
Unigene10541_Taxus	560	32	4.9399	gi|15220097|ref|NP_178144.1|	169	3e-50	hydrolase, alpha/beta fold family protein [Arabidopsis thaliana]	--	--	--
Unigene10542_Taxus	403	9	1.9306	--	--	--	--	--	--	--
Unigene10543_Taxus	1468	434	25.5574	gi|56550679|gb|AAV97793.1|	218	4e-82	At5g10750 [Arabidopsis thaliana] >gi|57222152|gb|AAW38983.1| At5g10750 [Arabidopsis thaliana]	Q52KI8	65.9	1e-12
Unigene10544_Taxus	381	51	11.5717	--	--	--	--	--	--	--
Unigene10545_Taxus	372	6	1.3943	--	--	--	--	--	--	--
Unigene10546_Taxus	637	48	6.5141	gi|116309441|emb|CAH66514.1|	78.6	7e-18	OSIGBa0142C11.2 [Oryza sativa (indica cultivar-group)]	--	--	--
Unigene10547_Taxus	774	279	31.1614	gi|255676701|dbj|BAF18664.2|	144	2e-33	Os06g0140200 [Oryza sativa Japonica Group]	Q9LYN8	114	9e-25
Unigene10548_Taxus	505	46	7.8744	gi|255670833|dbj|BAF08571.2|	82.4	4e-15	Os02g0313500 [Oryza sativa Japonica Group]	A8E4L1	60.1	7e-09
Unigene10549_Taxus	249	10	3.4718	gi|15218855|ref|NP_171855.1|	47.4	7e-09	pentatricopeptide (PPR) repeat-containing protein [Arabidopsis thaliana] >gi|75180297|sp|Q9LR67.1|PPR9_ARATH RecName: Full=Pentatricopeptide repeat-containing protein At1g03560, mitochondrial; Flags: Precursor >gi|9280662|gb|AAF86531.1|AC002560_24 F21B7.18 [Arabidopsis thaliana]	Q9LR67	47.4	2e-09
Unigene1054_Taxus	260	39	12.9672	--	--	--	--	--	--	--
Unigene10550_Taxus	399	114	24.6993	--	--	--	--	--	--	--
Unigene10551_Taxus	860	102	10.2531	gi|115482470|ref|NP_001064828.1|	158	2e-46	Os10g0471400 [Oryza sativa (japonica cultivar-group)] >gi|78708806|gb|ABB47781.1| TPR Domain containing protein, expressed [Oryza sativa (japonica cultivar-group)] >gi|78708807|gb|ABB47782.1| TPR Domain containing protein, expressed [Oryza sativa (japonica cultivar-group)] >gi|113639437|dbj|BAF26742.1| Os10g0471400 [Oryza sativa Japonica Group]	--	--	--
Unigene10552_Taxus	1445	133	7.9568	gi|115467812|ref|NP_001057505.1|	314	4e-84	Os06g0318700 [Oryza sativa (japonica cultivar-group)] >gi|75322005|sp|Q5ZA07.1|C3H41_ORYSJ RecName: Full=E3 ubiquitin-protein ligase makorin; AltName: Full=Zinc finger CCCH domain-containing protein 41; Short=OsC3H41 >gi|113595545|dbj|BAF19419.1| Os06g0318700 [Oryza sativa Japonica Group]	Q5ZA07	314	1e-84
Unigene10553_Taxus	255	7	2.3731	gi|72255624|gb|AAZ66942.1|	45.8	2e-10	117M18_23 [Brassica rapa]	--	--	--
Unigene10554_Taxus	925	48	4.4859	gi|115489730|ref|NP_001067352.1|	225	3e-82	Os12g0633600 [Oryza sativa (japonica cultivar-group)] >gi|113649859|dbj|BAF30371.1| Os12g0633600 [Oryza sativa Japonica Group]	Q07798	52.4	1e-06
Unigene10555_Taxus	255	29	9.8313	gi|115484731|ref|NP_001067509.1|	53.1	2e-06	Os11g0216300 [Oryza sativa (japonica cultivar-group)] >gi|113644731|dbj|BAF27872.1| Os11g0216300 [Oryza sativa Japonica Group]	Q8RWG1	51.6	1e-06
Unigene10556_Taxus	257	13	4.3728	gi|224099123|ref|XP_002311380.1|	52	4e-06	predicted protein [Populus trichocarpa] >gi|222851200|gb|EEE88747.1| predicted protein [Populus trichocarpa]	--	--	--
Unigene10557_Taxus	644	55	7.383	--	--	--	--	--	--	--
Unigene10558_Taxus	703	74	9.0998	gi|115446345|ref|NP_001046952.1|	102	6e-21	Os02g0515000 [Oryza sativa (japonica cultivar-group)] >gi|113536483|dbj|BAF08866.1| Os02g0515000 [Oryza sativa Japonica Group]	--	--	--
Unigene10559_Taxus	254	24	8.1683	gi|260751190|gb|ACX48911.1|	57.4	9e-08	ragged seedling 2 [Zea mays]	--	--	--
Unigene1055_Taxus	405	31	6.617	--	--	--	--	--	--	--
Unigene10560_Taxus	1682	208	10.6903	gi|224131066|ref|XP_002328445.1|	93.6	3e-38	tir-nbs-lrr resistance protein [Populus trichocarpa] >gi|222838160|gb|EEE76525.1| tir-nbs-lrr resistance protein [Populus trichocarpa]	Q40392	86.3	6e-16
Unigene10561_Taxus	261	110	36.4339	gi|20335|emb|CAA39776.1|	52.4	3e-06	alpha-amylase [Oryza sativa (japonica cultivar-group)]	P27933	52.4	9e-07
Unigene10562_Taxus	221	70	27.3816	gi|1354849|gb|AAB02006.1|	50.4	3e-07	epoxide hydrolase [Nicotiana tabacum]	--	--	--
Unigene10563_Taxus	513	43	7.2461	gi|115473301|ref|NP_001060249.1|	52.4	4e-06	Os07g0611600 [Oryza sativa (japonica cultivar-group)] >gi|113611785|dbj|BAF22163.1| Os07g0611600 [Oryza sativa Japonica Group]	P91753	50.1	7e-06
Unigene10564_Taxus	215	8	3.2167	--	--	--	--	--	--	--
Unigene10565_Taxus	2946	591	17.3424	gi|224127726|ref|XP_002329162.1|	142	6e-61	tir-nbs-lrr resistance protein [Populus trichocarpa] >gi|222870943|gb|EEF08074.1| tir-nbs-lrr resistance protein [Populus trichocarpa]	Q40392	129	2e-46
Unigene10566_Taxus	255	27	9.1533	--	--	--	--	--	--	--
Unigene10567_Taxus	1249	141	9.7591	gi|83423282|emb|CAI64810.1|	181	3e-85	nucleoporin [Lotus japonicus] >gi|83423284|emb|CAI64811.1| nucleoporin [Lotus japonicus]	--	--	--
Unigene10568_Taxus	489	25	4.4196	gi|222424042|dbj|BAH19982.1|	143	2e-50	AT4G36530 [Arabidopsis thaliana]	--	--	--
Unigene10569_Taxus	514	47	7.9048	gi|159902525|gb|ABX10769.1|	90.9	1e-17	gibberellin 20-oxidase-like protein [Selaginella moellendorffii]	P93771	73.6	6e-13
Unigene1056_Taxus	248	14	4.8801	gi|226509364|ref|NP_001152312.1|	108	3e-23	LOC100285951 [Zea mays] >gi|195654987|gb|ACG46961.1| catalytic/ hydrolase [Zea mays]	--	--	--
Unigene10570_Taxus	257	4	1.3455	gi|84313510|gb|ABC55465.1|	55.5	3e-07	TIR-NBS disease resistance-like protein [(Populus tomentosa x P. bolleana) x P. tomentosa var. truncata] >gi|84313512|gb|ABC55466.1| TIR-NBS disease resistance-like protein [(Populus tomentosa x P. bolleana) x P. tomentosa var. truncata]	--	--	--
Unigene10571_Taxus	855	101	10.212	gi|115447373|ref|NP_001047466.1|	293	4e-78	Os02g0622200 [Oryza sativa (japonica cultivar-group)] >gi|113536997|dbj|BAF09380.1| Os02g0622200 [Oryza sativa Japonica Group]	Q54M40	135	5e-31
Unigene10572_Taxus	481	50	8.9862	--	--	--	--	--	--	--
Unigene10573_Taxus	213	16	6.4937	gi|79305850|ref|NP_001030625.1|	79.3	2e-14	protein phosphatase 2C family protein / PP2C family protein [Arabidopsis thaliana]	Q9M8R7	79.3	6e-15
Unigene10574_Taxus	615	76	10.683	gi|115279797|gb|ABI85391.1|	129	4e-29	transcription factor IIIA [Solanum lycopersicum] >gi|115279800|gb|ABI85393.1| transcription factor IIIA [Solanum lycopersicum]	P34694	53.9	7e-07
Unigene10575_Taxus	464	39	7.2661	gi|77556192|gb|ABA98988.1|	55.8	3e-07	expressed protein [Oryza sativa (japonica cultivar-group)]	--	--	--
Unigene10576_Taxus	1199	286	20.6206	gi|124360609|gb|ABN08608.1|	375	1e-102	Zinc finger, RING-type [Medicago truncatula]	Q6IV56	56.6	3e-07
Unigene10577_Taxus	212	11	4.4855	--	--	--	--	--	--	--
Unigene10578_Taxus	1371	148	9.3321	gi|168002271|ref|XP_001753837.1|	67	1e-09	predicted protein [Physcomitrella patens subsp. patens] >gi|162694813|gb|EDQ81159.1| predicted protein [Physcomitrella patens subsp. patens]	--	--	--
Unigene10579_Taxus	248	5	1.7429	--	--	--	--	--	--	--
Unigene1057_Taxus	1014	172	14.6637	gi|224105741|ref|XP_002313918.1|	367	1e-100	magnesium transporter [Populus trichocarpa] >gi|222850326|gb|EEE87873.1| magnesium transporter [Populus trichocarpa]	Q4I298	79.3	4e-14
Unigene10580_Taxus	813	103	10.9522	gi|115464943|ref|NP_001056071.1|	132	9e-30	Os05g0520300 [Oryza sativa (japonica cultivar-group)] >gi|113579622|dbj|BAF17985.1| Os05g0520300 [Oryza sativa Japonica Group]	P69781	129	3e-29
Unigene10581_Taxus	712	60	7.2849	--	--	--	--	--	--	--
Unigene10582_Taxus	479	66	11.9114	--	--	--	--	--	--	--
Unigene10583_Taxus	521	41	6.803	gi|18421494|ref|NP_568532.1|	133	6e-45	AHK2 (ARABIDOPSIS HISTIDINE KINASE 2); cytokinin receptor/ osmosensor/ protein histidine kinase [Arabidopsis thaliana] >gi|13537196|dbj|BAB40774.1| histidine kinase [Arabidopsis thaliana]	Q54YZ9	60.1	7e-12
Unigene10584_Taxus	586	184	27.144	--	--	--	--	--	--	--
Unigene10585_Taxus	291	16	4.7531	gi|224086751|ref|XP_002307949.1|	75.1	4e-13	global transcription factor group [Populus trichocarpa] >gi|222853925|gb|EEE91472.1| global transcription factor group [Populus trichocarpa]	--	--	--
Unigene10586_Taxus	2807	805	24.7917	gi|225459207|ref|XP_002284042.1|	710	0	PREDICTED: similar to isoamylase-type starch-debranching enzyme 3 [Vitis vinifera]	Q9M0S5	692	0
Unigene10587_Taxus	656	82	10.806	gi|262411022|gb|ACY66877.1|	52.8	6e-06	P30Sh086H20 [Saccharum hybrid cultivar R570]	--	--	--
Unigene10588_Taxus	3294	2004	52.593	gi|15238798|ref|NP_199586.1|	779	0	D6PKL2 (D6 PROTEIN KINASE LIKE 2); kinase [Arabidopsis thaliana] >gi|217861|dbj|BAA01715.1| serine/threonine protein kinase [Arabidopsis thaliana] >gi|10177911|dbj|BAB11322.1| protein kinase (EC 2.7.1.37) 5 [Arabidopsis thaliana] >gi|15809919|gb|AAL06887.1| AT5g47750/MCA23_7 [Arabidopsis thaliana] >gi|21360567|gb|AAM47480.1| AT5g47750/MCA23_7 [Arabidopsis thaliana]	Q0DCT8	716	0
Unigene10589_Taxus	330	54	14.146	gi|2921406|gb|AAC39472.1|	175	3e-43	vacuolar protein sorting homolog [Arabidopsis thaliana]	O49048	175	9e-44
Unigene1058_Taxus	309	22	6.1549	gi|115489504|ref|NP_001067239.1|	92.4	2e-18	Os12g0608900 [Oryza sativa (japonica cultivar-group)] >gi|77556479|gb|ABA99275.1| Protein kinase domain containing protein [Oryza sativa (japonica cultivar-group)] >gi|113649746|dbj|BAF30258.1| Os12g0608900 [Oryza sativa Japonica Group]	Q9M0X5	50.1	4e-06
Unigene10590_Taxus	533	272	44.1159	gi|8569098|gb|AAF76443.1|AC015445_10	120	2e-26	ESTs gb|F20048, gb|F20049 come from this gene [Arabidopsis thaliana]	--	--	--
Unigene10591_Taxus	438	64	12.6316	--	--	--	--	--	--	--
Unigene10592_Taxus	245	10	3.5285	gi|15233259|ref|NP_188222.1|	97.4	8e-20	pentatricopeptide (PPR) repeat-containing protein [Arabidopsis thaliana] >gi|75274469|sp|Q9LW84.1|PP236_ARATH RecName: Full=Pentatricopeptide repeat-containing protein At3g16010	Q9LW84	97.4	2e-20
Unigene10593_Taxus	240	5	1.801	gi|168015774|ref|XP_001760425.1|	45.4	1e-08	predicted protein [Physcomitrella patens subsp. patens] >gi|162688439|gb|EDQ74816.1| predicted protein [Physcomitrella patens subsp. patens]	--	--	--
Unigene10594_Taxus	556	51	7.9296	gi|30684562|ref|NP_850143.1|	52.4	6e-15	allergen-related [Arabidopsis thaliana]	--	--	--
Unigene10595_Taxus	272	5	1.5891	--	--	--	--	--	--	--
Unigene10596_Taxus	1103	407	31.8987	gi|124484379|dbj|BAF46300.1|	160	6e-38	GPI-anchored protein [Ipomoea nil]	B3GS44	130	2e-29
Unigene10597_Taxus	1442	269	16.1265	gi|15233958|ref|NP_195009.1|	411	1e-113	AtAUR1 (ATAURORA1); histone kinase(H3-S10 specific) / kinase/ protein serine/threonine kinase [Arabidopsis thaliana] >gi|75335736|sp|Q9M077.1|AUR1_ARATH RecName: Full=Serine/threonine-protein kinase Aurora-1; Short=AtAur1; AltName: Full=Aurora-like kinase 1 >gi|55467118|emb|CAH69532.1| aurora-like kinase 1 [Arabidopsis thaliana] >gi|67845859|dbj|BAE00019.1| Aurora kinase [Arabidopsis thaliana]	Q9M077	411	1e-114
Unigene10598_Taxus	1072	153	12.3382	gi|224125208|ref|XP_002329920.1|	75.5	2e-12	chromatin remodeling complex subunit [Populus trichocarpa] >gi|222871157|gb|EEF08288.1| chromatin remodeling complex subunit [Populus trichocarpa]	--	--	--
Unigene10599_Taxus	833	98	10.1703	--	--	--	--	--	--	--
Unigene1059_Taxus	203	15	6.3878	--	--	--	--	--	--	--
Unigene105_Taxus	970	6691	596.311	gi|10834829|gb|AAG23841.1|AF302808_1	75.1	2e-12	metallothionein-like protein [Sesamum indicum] >gi|40732882|gb|AAR88997.1| seed-specific metallothionein-like protein [Sesamum indicum]	P93746	63.9	2e-09
Unigene10600_Taxus	279	14	4.3379	--	--	--	--	--	--	--
Unigene10601_Taxus	3279	499	13.1557	gi|42568895|ref|NP_178414.2|	245	7e-85	emb1579 (embryo defective 1579); binding / calcium ion binding [Arabidopsis thaliana]	Q8CH18	151	2e-38
Unigene10602_Taxus	473	31	5.6657	--	--	--	--	--	--	--
Unigene10603_Taxus	313	76	20.9905	--	--	--	--	--	--	--
Unigene10604_Taxus	369	36	8.4339	--	--	--	--	--	--	--
Unigene10605_Taxus	478	26	4.7022	--	--	--	--	--	--	--
Unigene10606_Taxus	287	13	3.9158	--	--	--	--	--	--	--
Unigene10607_Taxus	247	10	3.4999	gi|15229822|ref|NP_190635.1|	108	3e-23	DWF4 (DWARF 4); steroid 22-alpha hydroxylase [Arabidopsis thaliana] >gi|15724348|gb|AAL06567.1|AF412114_1 AT3g50660/T3A5_40 [Arabidopsis thaliana] >gi|6561969|emb|CAB62435.1| steroid 22-alpha-hydroxylase (DWF4) [Arabidopsis thaliana] >gi|19699122|gb|AAL90927.1| AT3g50660/T3A5_40 [Arabidopsis thaliana]	O64989	108	1e-23
Unigene10608_Taxus	414	29	6.0555	gi|19453|emb|CAA78966.1|	62	3e-09	pollen preferential protein [Lilium longiflorum] >gi|19455|emb|CAA78977.1| pollen preferential protein [Lilium longiflorum] >gi|308904|gb|AAA33399.1| pollen preferential protein [Lilium longiflorum]	--	--	--
Unigene10609_Taxus	655	2352	310.42	gi|6694707|gb|AAF25364.1|AF210068_1	346	2e-94	dirigent-like protein [Thuja plicata]	P13240	237	4e-62
Unigene1060_Taxus	349	12	2.9724	gi|261414304|gb|ACX83570.1|	47	2e-11	DNA methyltransferase [Hieracium pilosella]	B1Q3J6	42.7	1e-10
Unigene10610_Taxus	1283	297	20.0117	gi|224074167|ref|XP_002304283.1|	438	1e-121	formyltetrahydrofolate deformylase [Populus trichocarpa] >gi|222841715|gb|EEE79262.1| formyltetrahydrofolate deformylase [Populus trichocarpa]	O34990	182	4e-45
Unigene10611_Taxus	240	4	1.4408	gi|140072141|gb|ABO84808.1|	55.1	4e-07	Chaperonin Cpn60/TCP-1; Phosphatidylinositol-4-phosphate 5-kinase; Zinc finger, FYVE/PHD-type [Medicago truncatula]	--	--	--
Unigene10612_Taxus	736	410	48.157	gi|42572363|ref|NP_974277.1|	197	1e-49	haloacid dehalogenase-like hydrolase family protein [Arabidopsis thaliana]	--	--	--
Unigene10613_Taxus	593	37	5.3939	--	--	--	--	--	--	--
Unigene10614_Taxus	2002	560	24.1812	gi|7248359|dbj|BAA92697.1|	613	1e-174	type 2A protein phosphatase-1 [Vicia faba]	Q07098	607	1e-173
Unigene10615_Taxus	1823	728	34.5222	gi|255679634|dbj|BAF27221.2|	511	1e-143	Os10g0561200 [Oryza sativa Japonica Group]	--	--	--
Unigene10616_Taxus	313	16	4.4191	gi|289466349|gb|ADC94860.1|	117	5e-26	ERF transcription factor 4 [Vitis pseudoreticulata]	O04681	116	4e-26
Unigene10617_Taxus	276	92	28.8159	--	--	--	--	--	--	--
Unigene10618_Taxus	222	14	5.4517	--	--	--	--	--	--	--
Unigene10619_Taxus	252	8	2.7444	--	--	--	--	--	--	--
Unigene1061_Taxus	410	10	2.1085	gi|145338105|ref|NP_187098.2|	80.9	7e-27	endoribonuclease [Arabidopsis thaliana]	Q5M9F5	62.4	1e-17
Unigene10620_Taxus	5133	2140	36.0409	gi|115453941|ref|NP_001050571.1|	1689	0	Os03g0586700 [Oryza sativa (japonica cultivar-group)] >gi|50399948|gb|AAT76336.1| expressed protein [Oryza sativa Japonica Group] >gi|108709559|gb|ABF97354.1| expressed protein [Oryza sativa (japonica cultivar-group)] >gi|113549042|dbj|BAF12485.1| Os03g0586700 [Oryza sativa Japonica Group]	Q9ULE6	187	5e-46
Unigene10621_Taxus	275	26	8.1732	gi|115466824|ref|NP_001057011.1|	146	1e-34	Os06g0186600 [Oryza sativa (japonica cultivar-group)] >gi|113595051|dbj|BAF18925.1| Os06g0186600 [Oryza sativa Japonica Group]	--	--	--
Unigene10622_Taxus	478	30	5.4256	gi|3157945|gb|AAC17628.1|	226	2e-58	Contains similarity to axi 1 gene gb|X80301 from Nicotiana tabacum [Arabidopsis thaliana]	Q8W486	84.7	2e-16
Unigene10623_Taxus	445	33	6.4107	--	--	--	--	--	--	--
Unigene10624_Taxus	1016	71	6.0411	gi|49387952|dbj|BAD25050.1|	75.9	1e-23	nuclear protein ZAP-like [Oryza sativa Japonica Group]	--	--	--
Unigene10625_Taxus	962	53	4.7627	gi|116057866|emb|CAL54069.1|	79.3	4e-24	Maltase glucoamylase and related hydrolases, glycosyl hydrolase family 31 (ISS) [Ostreococcus tauri]	Q58760	66.6	2e-15
Unigene10626_Taxus	222	51	19.8596	gi|7769870|gb|AAF69548.1|AC008007_23	51.6	5e-06	F12M16.16 [Arabidopsis thaliana]	--	--	--
Unigene10627_Taxus	205	20	8.4339	--	--	--	--	--	--	--
Unigene10628_Taxus	785	247	27.2007	--	--	--	--	--	--	--
Unigene10629_Taxus	487	32	5.6803	--	--	--	--	--	--	--
Unigene1062_Taxus	309	12	3.3572	--	--	--	--	--	--	--
Unigene10630_Taxus	360	19	4.5625	--	--	--	--	--	--	--
Unigene10631_Taxus	273	13	4.1166	--	--	--	--	--	--	--
Unigene10632_Taxus	272	55	17.4802	--	--	--	--	--	--	--
Unigene10633_Taxus	273	32	10.1331	--	--	--	--	--	--	--
Unigene10634_Taxus	714	498	60.2955	gi|154103626|gb|ABS58628.1|	109	6e-23	dehydrin 4 [Picea abies]	P31168	86.7	1e-16
Unigene10635_Taxus	282	7	2.1459	gi|30686117|ref|NP_181004.2|	47	2e-11	MEE21 (maternal effect embryo arrest 21) [Arabidopsis thaliana]	--	--	--
Unigene10636_Taxus	296	3464	1011.67	gi|116332|sp|P29060.1|CHIA_TOBAC	51.6	5e-06	RecName: Full=Acidic endochitinase; Flags: Precursor >gi|19775|emb|CAA77656.1| acidic chitinase III [Nicotiana tabacum]	P29060	51.6	1e-06
Unigene10637_Taxus	660	79	10.3475	--	--	--	--	--	--	--
Unigene10638_Taxus	570	80	12.133	--	--	--	--	--	--	--
Unigene10639_Taxus	251	7	2.4109	gi|224060485|ref|XP_002300222.1|	74.3	4e-26	ammonium transporter [Populus trichocarpa] >gi|222847480|gb|EEE85027.1| ammonium transporter [Populus trichocarpa]	Q9M6N7	69.3	7e-12
Unigene1063_Taxus	375	98	22.5917	gi|255077035|ref|XP_002502172.1|	132	3e-30	PUA like RNA binding protein [Micromonas sp. RCC299] >gi|226517437|gb|ACO63430.1| PUA like RNA binding protein [Micromonas sp. RCC299]	Q6DFH9	124	1e-28
Unigene10640_Taxus	954	85	7.7024	gi|115467598|ref|NP_001057398.1|	200	9e-71	Os06g0284200 [Oryza sativa (japonica cultivar-group)] >gi|113595438|dbj|BAF19312.1| Os06g0284200 [Oryza sativa Japonica Group]	Q8W486	98.2	2e-24
Unigene10641_Taxus	242	7	2.5006	--	--	--	--	--	--	--
Unigene10642_Taxus	247	32	11.1997	--	--	--	--	--	--	--
Unigene10643_Taxus	223	37	14.3433	--	--	--	--	--	--	--
Unigene10644_Taxus	323	141	37.7372	--	--	--	--	--	--	--
Unigene10645_Taxus	1940	537	23.9291	gi|115445547|ref|NP_001046553.1|	611	1e-173	Os02g0280100 [Oryza sativa (japonica cultivar-group)] >gi|113536084|dbj|BAF08467.1| Os02g0280100 [Oryza sativa Japonica Group]	P55081	288	1e-76
Unigene10646_Taxus	246	5	1.7571	gi|115446655|ref|NP_001047107.1|	45.1	1e-08	Os02g0552600 [Oryza sativa (japonica cultivar-group)]	P93194	52.4	5e-09
Unigene10647_Taxus	1361	171	10.8615	--	--	--	--	--	--	--
Unigene10648_Taxus	1820	355	16.8621	gi|15232945|ref|NP_186914.1|	167	2e-50	pentatricopeptide (PPR) repeat-containing protein [Arabidopsis thaliana]	P0C896	167	5e-51
Unigene10649_Taxus	466	19	3.5247	gi|15218216|ref|NP_173004.1|	82.8	2e-20	pentatricopeptide (PPR) repeat-containing protein [Arabidopsis thaliana] >gi|75191104|sp|Q9M9E2.1|PPR45_ARATH RecName: Full=Pentatricopeptide repeat-containing protein At1g15510, chloroplastic; Flags: Precursor >gi|8072389|gb|AAF71977.1|AC013453_2 Hypothetical protein [Arabidopsis thaliana]	Q9M9E2	82.8	6e-21
Unigene1064_Taxus	1335	391	25.3191	gi|15241832|ref|NP_201048.1|	327	4e-88	aldo/keto reductase family protein [Arabidopsis thaliana] >gi|10178073|dbj|BAB11492.1| aldose reductase-like protein [Arabidopsis thaliana] >gi|67633910|gb|AAY78879.1| aldo/keto reductase family protein [Arabidopsis thaliana]	P26690	287	1e-76
Unigene10650_Taxus	256	29	9.7929	gi|15240645|ref|NP_196856.1|	53.1	2e-06	peptidase M1 family protein [Arabidopsis thaliana] >gi|9955544|emb|CAC05429.1| leukotriene-A4 hydrolase-like protein [Arabidopsis thaliana]	--	--	--
Unigene10651_Taxus	3209	1268	34.1588	gi|18398958|ref|NP_565447.1|	1099	0	SLP3; serine-type peptidase [Arabidopsis thaliana] >gi|3176726|gb|AAD12040.1| subtilisin-like serine protease [Arabidopsis thaliana]	O65351	360	3e-98
Unigene10652_Taxus	3605	1022	24.5075	gi|115446093|ref|NP_001046826.1|	762	0	Os02g0469200 [Oryza sativa (japonica cultivar-group)] >gi|113536357|dbj|BAF08740.1| Os02g0469200 [Oryza sativa Japonica Group]	--	--	--
Unigene10653_Taxus	1280	154	10.4007	gi|22330231|ref|NP_175776.2|	273	1e-121	CYP59 (CYCLOPHILIN 59); RNA binding / nucleic acid binding / peptidyl-prolyl cis-trans isomerase [Arabidopsis thaliana] >gi|45680880|gb|AAS75309.1| multidomain cyclophilin type peptidyl-prolyl cis-trans isomerase [Arabidopsis thaliana]	Q8WUA2	184	3e-75
Unigene10654_Taxus	709	526	64.1347	gi|124361091|gb|ABN09063.1|	280	3e-74	Major facilitator superfamily [Medicago truncatula]	Q95R48	84.7	5e-16
Unigene10655_Taxus	1643	208	10.9441	gi|115465275|ref|NP_001056237.1|	247	7e-64	Os05g0549800 [Oryza sativa (japonica cultivar-group)] >gi|122249209|sp|Q6L4H4.1|Y5498_ORYSJ RecName: Full=AP2/ERF and B3 domain-containing protein Os05g0549800 >gi|113579788|dbj|BAF18151.1| Os05g0549800 [Oryza sativa Japonica Group]	Q6L4H4	247	2e-64
Unigene10656_Taxus	625	93	12.8634	--	--	--	--	--	--	--
Unigene10657_Taxus	395	82	17.9461	--	--	--	--	--	--	--
Unigene10658_Taxus	454	25	4.7603	gi|224089239|ref|XP_002308662.1|	43.1	2e-14	rna-dependent RNA polymerase [Populus trichocarpa] >gi|222854638|gb|EEE92185.1| rna-dependent RNA polymerase [Populus trichocarpa]	Q8LHH9	43.1	4e-10
Unigene10659_Taxus	586	52	7.6711	--	--	--	--	--	--	--
Unigene1065_Taxus	263	131	43.0595	--	--	--	--	--	--	--
Unigene10660_Taxus	234	5	1.8472	--	--	--	--	--	--	--
Unigene10661_Taxus	923	79	7.3991	gi|15237662|ref|NP_201237.1|	132	8e-30	pentatricopeptide (PPR) repeat-containing protein [Arabidopsis thaliana] >gi|75171655|sp|Q9FMF6.1|PP444_ARATH RecName: Full=Pentatricopeptide repeat-containing protein At5g64320, mitochondrial; Flags: Precursor	Q9FMF6	132	3e-30
Unigene10662_Taxus	1340	165	10.6447	gi|255678742|dbj|BAF24706.2|	143	2e-75	Os09g0293500 [Oryza sativa Japonica Group]	Q9ZPS9	144	1e-73
Unigene10663_Taxus	494	172	30.0992	gi|3193297|gb|AAC19281.1|	137	7e-32	T14P8.15 [Arabidopsis thaliana] >gi|7268994|emb|CAB80727.1| AT4g02340 [Arabidopsis thaliana] >gi|20856515|gb|AAM26670.1| AT4g02340/T14P8_15 [Arabidopsis thaliana] >gi|23308303|gb|AAN18121.1| At4g02340/T14P8_15 [Arabidopsis thaliana]	O31581	99.4	9e-21
Unigene10664_Taxus	251	17	5.855	--	--	--	--	--	--	--
Unigene10665_Taxus	1968	799	35.0974	gi|15231095|ref|NP_190766.1|	355	2e-96	binding [Arabidopsis thaliana]	Q6NUA7	90.5	4e-17
Unigene10666_Taxus	228	59	22.3702	--	--	--	--	--	--	--
Unigene10667_Taxus	484	32	5.7156	gi|92109218|dbj|BAE93352.1|	151	2e-47	phosphate transporter [Lotus japonicus] >gi|92109224|dbj|BAE93355.1| phosphate transporter [Lotus japonicus]	Q96303	149	9e-45
Unigene10668_Taxus	615	119	16.7273	--	--	--	--	--	--	--
Unigene10669_Taxus	253	20	6.8338	--	--	--	--	--	--	--
Unigene1066_Taxus	296	9	2.6285	--	--	--	--	--	--	--
Unigene10670_Taxus	1933	375	16.7708	gi|108711956|gb|ABF99751.1|	632	1e-179	Kelch motif family protein, expressed [Oryza sativa (japonica cultivar-group)]	Q9V4C8	107	4e-22
Unigene10671_Taxus	256	4	1.3507	--	--	--	--	--	--	--
Unigene10672_Taxus	1194	981	71.0261	gi|13161912|emb|CAC33003.1|	474	1e-132	urease accessory protein G [Solanum tuberosum]	Q96WV0	322	4e-87
Unigene10673_Taxus	298	22	6.382	--	--	--	--	--	--	--
Unigene10674_Taxus	1832	213	10.051	gi|115450183|ref|NP_001048692.1|	297	5e-79	Os03g0107400 [Oryza sativa (japonica cultivar-group)] >gi|113547163|dbj|BAF10606.1| Os03g0107400 [Oryza sativa Japonica Group]	P25386	69.3	9e-11
Unigene10675_Taxus	1919	464	20.9024	gi|224126057|ref|XP_002319745.1|	143	2e-32	chromodomain protein [Populus trichocarpa] >gi|222858121|gb|EEE95668.1| chromodomain protein [Populus trichocarpa]	Q946J8	126	9e-29
Unigene10676_Taxus	609	97	13.7692	--	--	--	--	--	--	--
Unigene10677_Taxus	449	28	5.3909	gi|224145557|ref|XP_002325685.1|	142	2e-33	equilibrative nucleoside transporter [Populus trichocarpa] >gi|222862560|gb|EEF00067.1| equilibrative nucleoside transporter [Populus trichocarpa]	--	--	--
Unigene10678_Taxus	213	50	20.2929	gi|226510061|ref|NP_001148509.1|	86.3	2e-16	peroxidase 72 [Zea mays] >gi|195619908|gb|ACG31784.1| peroxidase 72 precursor [Zea mays]	Q96512	83.2	4e-16
Unigene10679_Taxus	270	24	7.6842	gi|225442485|ref|XP_002278313.1|	172	1e-42	PREDICTED: similar to PDR8/PEN3 (PLEIOTROPIC DRUG RESISTANCE8); ATPase, coupled to transmembrane movement of substances / cadmium ion transmembrane transporter [Vitis vinifera]	Q94A18	172	4e-43
Unigene1067_Taxus	810	146	15.5819	gi|32488318|emb|CAE02895.1|	357	1e-113	OSJNBa0015K02.12 [Oryza sativa (japonica cultivar-group)]	Q55G83	106	2e-28
Unigene10680_Taxus	722	109	13.051	gi|32488374|emb|CAE02799.1|	107	3e-22	OSJNBa0043A12.4 [Oryza sativa (japonica cultivar-group)] >gi|90399231|emb|CAH68305.1| B0811B10.6 [Oryza sativa (indica cultivar-group)] >gi|116308861|emb|CAH65998.1| H1005F08.27 [Oryza sativa (indica cultivar-group)]	--	--	--
Unigene10681_Taxus	1996	349	15.1154	gi|24476034|gb|AAN62776.1|	257	8e-67	Putative kinesin-related protein [Oryza sativa Japonica Group] >gi|108705750|gb|ABF93545.1| expressed protein [Oryza sativa (japonica cultivar-group)]	P24733	132	1e-29
Unigene10682_Taxus	679	168	21.3891	gi|94807648|gb|ABF47121.1|	56.2	6e-07	At5g02220 [Arabidopsis thaliana]	--	--	--
Unigene10683_Taxus	466	34	6.3073	gi|115460090|ref|NP_001053645.1|	61.6	5e-09	Os04g0579700 [Oryza sativa (japonica cultivar-group)] >gi|32488518|emb|CAE03270.1| OSJNBa0011J08.25 [Oryza sativa (japonica cultivar-group)] >gi|38345861|emb|CAD41158.2| OSJNBa0064M23.3 [Oryza sativa (japonica cultivar-group)] >gi|113565216|dbj|BAF15559.1| Os04g0579700 [Oryza sativa Japonica Group]	--	--	--
Unigene10684_Taxus	219	25	9.8685	gi|21655189|gb|AAM28909.1|	51.6	5e-06	NBS/LRR [Pinus taeda]	--	--	--
Unigene10685_Taxus	1378	143	8.971	gi|225432468|ref|XP_002277304.1|	87.4	7e-16	PREDICTED: hypothetical protein [Vitis vinifera]	--	--	--
Unigene10686_Taxus	248	13	4.5315	--	--	--	--	--	--	--
Unigene10687_Taxus	839	118	12.1583	gi|93138735|gb|ABE99812.1|	129	6e-29	potassium transporter HAK4 [Hordeum vulgare]	Q8H3P9	122	4e-27
Unigene10688_Taxus	261	12	3.9746	--	--	--	--	--	--	--
Unigene10689_Taxus	320	130	35.1194	gi|115469606|ref|NP_001058402.1|	76.3	2e-13	Os06g0686600 [Oryza sativa (japonica cultivar-group)] >gi|113596442|dbj|BAF20316.1| Os06g0686600 [Oryza sativa Japonica Group]	--	--	--
Unigene1068_Taxus	229	6	2.265	--	--	--	--	--	--	--
Unigene10690_Taxus	391	26	5.7484	--	--	--	--	--	--	--
Unigene10691_Taxus	601	45	6.4728	gi|18412730|ref|NP_567145.1|	82	7e-15	protein phosphatase 2C-related / PP2C-related [Arabidopsis thaliana] >gi|229904900|sp|Q93YS2.2|P2C51_ARATH RecName: Full=Probable protein phosphatase 2C 51; Short=AtPP2C51	A3CCP9	84.7	4e-16
Unigene10692_Taxus	885	90	8.7913	gi|2190557|gb|AAB60921.1|	290	4e-77	F5I14.11 [Arabidopsis thaliana]	Q84W55	290	1e-77
Unigene10693_Taxus	230	80	30.0688	--	--	--	--	--	--	--
Unigene10694_Taxus	500	42	7.2616	--	--	--	--	--	--	--
Unigene10695_Taxus	252	12	4.1166	--	--	--	--	--	--	--
Unigene10696_Taxus	787	425	46.684	gi|255675504|dbj|BAF14809.2|	92	1e-17	Os04g0444700 [Oryza sativa Japonica Group]	--	--	--
Unigene10697_Taxus	405	53	11.3129	--	--	--	--	--	--	--
Unigene10698_Taxus	341	13	3.2957	gi|115466206|ref|NP_001056702.1|	57.4	8e-08	Os06g0132500 [Oryza sativa (japonica cultivar-group)] >gi|113594742|dbj|BAF18616.1| Os06g0132500 [Oryza sativa Japonica Group]	--	--	--
Unigene10699_Taxus	843	131	13.4337	gi|45331281|gb|AAS57912.1|	234	3e-97	70 kDa heat shock cognate protein 1 [Vigna radiata]	P26413	229	2e-95
Unigene1069_Taxus	1986	461	20.0667	gi|15232434|ref|NP_190981.1|	318	3e-85	josephin family protein [Arabidopsis thaliana] >gi|29336976|sp|Q9M391.1|ATX3H_ARATH RecName: Full=Ataxin-3 homolog; AltName: Full=Machado-Joseph disease-like protein; AltName: Full=MJD1a-like >gi|6822059|emb|CAB70987.1| Machado-Joseph disease MJD1a-like protein [Arabidopsis thaliana] >gi|38564306|gb|AAR23732.1| At3g54130 [Arabidopsis thaliana] >gi|38604054|gb|AAR24770.1| At3g54130 [Arabidopsis th…	Q9M391	318	9e-86
Unigene106_Taxus	648	298	39.7553	gi|157313312|gb|ABV32549.1|	274	1e-72	pectase lyase [Prunus persica]	Q9C5M8	268	2e-71
Unigene10700_Taxus	276	11	3.4454	--	--	--	--	--	--	--
Unigene10701_Taxus	280	37	11.4234	--	--	--	--	--	--	--
Unigene10702_Taxus	764	40	4.5261	gi|226495163|ref|NP_001152154.1|	65.9	5e-12	LOC100285792 [Zea mays] >gi|195653247|gb|ACG46091.1| mTERF family protein [Zea mays]	--	--	--
Unigene10703_Taxus	400	19	4.1063	gi|108710743|gb|ABF98538.1|	55.8	2e-07	expressed protein [Oryza sativa (japonica cultivar-group)] >gi|255674836|dbj|BAH92342.1| Os03g0713700 [Oryza sativa Japonica Group]	--	--	--
Unigene10704_Taxus	2622	830	27.3652	gi|115462915|ref|NP_001055057.1|	285	4e-75	Os05g0270200 [Oryza sativa (japonica cultivar-group)] >gi|113578608|dbj|BAF16971.1| Os05g0270200 [Oryza sativa Japonica Group]	Q9UH99	95.5	2e-18
Unigene10705_Taxus	224	97	37.4349	--	--	--	--	--	--	--
Unigene10706_Taxus	391	49	10.8336	--	--	--	--	--	--	--
Unigene10707_Taxus	249	13	4.5133	gi|115472995|ref|NP_001060096.1|	58.2	4e-15	Os07g0578800 [Oryza sativa (japonica cultivar-group)]	Q9FWA6	55.5	2e-15
Unigene10708_Taxus	1850	1824	85.2328	gi|145337785|ref|NP_178112.2|	814	0	ATERDJ2A; heat shock protein binding / unfolded protein binding [Arabidopsis thaliana] >gi|186496567|ref|NP_001031306.2| ATERDJ2A; heat shock protein binding / unfolded protein binding [Arabidopsis thaliana] >gi|186496571|ref|NP_001117623.1| ATERDJ2A; heat shock protein binding / unfolded protein binding [Arabidopsis thaliana]	Q5R660	161	2e-38
Unigene10709_Taxus	358	12	2.8977	--	--	--	--	--	--	--
Unigene1070_Taxus	1539	169	9.493	gi|115452371|ref|NP_001049786.1|	348	1e-94	Os03g0288600 [Oryza sativa (japonica cultivar-group)] >gi|29367599|gb|AAO72661.1| muscle derived-like protein [Oryza sativa Japonica Group] >gi|113548257|dbj|BAF11700.1| Os03g0288600 [Oryza sativa Japonica Group] >gi|169730524|gb|ACA64828.1| SKIP interacting protein 6 [Oryza sativa]	Q6PAM1	173	3e-42
Unigene10710_Taxus	308	67	18.8052	gi|255676078|dbj|BAF16715.2|	126	1e-28	Os05g0178900 [Oryza sativa Japonica Group]	Q6P7Y3	61.6	1e-09
Unigene10711_Taxus	1414	264	16.1402	gi|765203|gb|AAB31252.1|	247	4e-93	linoleate:oxygen oxidoreductase [Solanum tuberosum]	P38415	245	7e-93
Unigene10712_Taxus	993	193	16.802	gi|79330574|ref|NP_001032057.1|	70.5	1e-22	LPA2 (low psii accumulation2) [Arabidopsis thaliana]	--	--	--
Unigene10713_Taxus	517	70	11.7047	gi|431154|dbj|BAA04837.1|	102	3e-21	ORF [Lilium longiflorum]	Q8LFH5	84.7	3e-16
Unigene10714_Taxus	793	40	4.3605	gi|224589547|gb|ACN59307.1|	142	5e-49	leucine-rich repeat receptor-like protein kinase [Arabidopsis thaliana]	Q9SGP2	60.8	1e-08
Unigene10715_Taxus	4670	1753	32.4503	gi|115480719|ref|NP_001063953.1|	388	1e-106	Os09g0566100 [Oryza sativa (japonica cultivar-group)] >gi|113632186|dbj|BAF25867.1| Os09g0566100 [Oryza sativa Japonica Group]	O94913	67	5e-16
Unigene10716_Taxus	381	18	4.0841	--	--	--	--	--	--	--
Unigene10717_Taxus	363	9	2.1433	gi|168000833|ref|XP_001753120.1|	50.1	2e-14	predicted protein [Physcomitrella patens subsp. patens] >gi|162695819|gb|EDQ82161.1| predicted protein [Physcomitrella patens subsp. patens]	--	--	--
Unigene10718_Taxus	493	78	13.6773	gi|224126017|ref|XP_002319735.1|	112	2e-24	f-box family protein [Populus trichocarpa] >gi|222858111|gb|EEE95658.1| f-box family protein [Populus trichocarpa]	Q9CAZ0	99.4	9e-21
Unigene10719_Taxus	276	660	206.723	gi|1015937|emb|CAA62943.1|	196	9e-51	extensin class 1 protein [Vigna unguiculata]	P06599	127	8e-31
Unigene1071_Taxus	1424	750	45.5307	gi|18000072|gb|AAL54887.1|AF092916_1	430	1e-119	cytochrome P450-dependent fatty acid hydroxylase [Nicotiana tabacum]	O81117	416	1e-115
Unigene10720_Taxus	424	17	3.4661	--	--	--	--	--	--	--
Unigene10721_Taxus	356	37	8.9847	--	--	--	--	--	--	--
Unigene10722_Taxus	416	12	2.4937	gi|30684540|ref|NP_193617.2|	70.9	2e-24	ATP binding / DNA binding / DNA-directed DNA polymerase/ nucleoside-triphosphatase/ nucleotide binding [Arabidopsis thaliana]	P47658	45.4	1e-07
Unigene10723_Taxus	1378	380	23.839	gi|224090097|ref|XP_002308937.1|	531	1e-149	ABC transporter family, cholesterol/phospholipid flippase [Populus trichocarpa] >gi|222854913|gb|EEE92460.1| ABC transporter family, cholesterol/phospholipid flippase [Populus trichocarpa]	Q84M24	499	1e-140
Unigene10724_Taxus	1238	125	8.7286	gi|15218903|ref|NP_176183.1|	202	3e-71	proton-dependent oligopeptide transport (POT) family protein [Arabidopsis thaliana]	Q05085	180	6e-62
Unigene10725_Taxus	324	84	22.4124	gi|115453603|ref|NP_001050402.1|	132	2e-30	Os03g0425200 [Oryza sativa (japonica cultivar-group)] >gi|108708912|gb|ABF96707.1| Inosine-uridine preferring nucleoside hydrolase family protein, expressed [Oryza sativa (japonica cultivar-group)] >gi|113548873|dbj|BAF12316.1| Os03g0425200 [Oryza sativa Japonica Group]	--	--	--
Unigene10726_Taxus	218	5	1.9827	--	--	--	--	--	--	--
Unigene10727_Taxus	688	63	7.916	gi|1871180|gb|AAB63540.1|	68.6	1e-10	expressed protein [Arabidopsis thaliana]	--	--	--
Unigene10728_Taxus	848	226	23.0391	gi|15450824|gb|AAK96683.1|	120	3e-26	Unknown protein [Arabidopsis thaliana]	--	--	--
Unigene10729_Taxus	668	159	20.5766	gi|227204119|dbj|BAH56911.1|	122	6e-27	AT4G19160 [Arabidopsis thaliana]	--	--	--
Unigene1072_Taxus	237	7	2.5533	--	--	--	--	--	--	--
Unigene10730_Taxus	263	37	12.1618	gi|227204229|dbj|BAH56966.1|	56.2	2e-07	AT4G36850 [Arabidopsis thaliana]	--	--	--
Unigene10731_Taxus	433	31	6.1891	gi|15239346|ref|NP_201434.1|	68.6	4e-11	leucine-rich repeat family protein [Arabidopsis thaliana]	--	--	--
Unigene10732_Taxus	563	42	6.449	gi|87162615|gb|ABD28410.1|	148	5e-40	Exostosin-like [Medicago truncatula] >gi|116831751|gb|ABK28848.1| exostosin-like protein [Medicago truncatula]	Q93063	60.5	7e-09
Unigene10733_Taxus	997	419	36.3306	gi|15809802|gb|AAL06829.1|	163	6e-39	AT5g62650/MRG21_7 [Arabidopsis thaliana] >gi|18377813|gb|AAL67093.1| AT5g62650/MRG21_7 [Arabidopsis thaliana]	--	--	--
Unigene10734_Taxus	1287	571	38.354	gi|15232542|ref|NP_188773.1|	268	2e-70	electron carrier/ oxidoreductase [Arabidopsis thaliana] >gi|73921104|sp|Q9LIG0.1|Y3136_ARATH RecName: Full=Clavaminate synthase-like protein At3g21360 >gi|56967335|pdb|1Y0Z|A Chain A, X-Ray Structure Of Gene Product From Arabidopsis Thaliana At3g21360 >gi|56967336|pdb|1Y0Z|B Chain B, X-Ray Structure Of Gene Product From Arabidopsis Thaliana At3g21360 >gi|150261485|pdb|2Q4A|A Chain A, Ensemble Ref…	Q9LIG0	268	6e-71
Unigene10735_Taxus	396	16	3.4928	gi|270255422|emb|CBI37806.1|	54.7	6e-07	unnamed protein product [Vitis vinifera]	--	--	--
Unigene10736_Taxus	304	9	2.5593	--	--	--	--	--	--	--
Unigene10737_Taxus	407	14	2.9736	gi|24935275|gb|AAN64409.1|	86.7	5e-28	RNA-dependent RNA polymerase 1 [Arabidopsis thaliana]	Q0DXS3	86.3	7e-26
Unigene10738_Taxus	255	5	1.6951	--	--	--	--	--	--	--
Unigene10739_Taxus	2681	550	17.7345	gi|227204171|dbj|BAH56937.1|	148	1e-35	AT2G23740 [Arabidopsis thaliana]	Q6DGD3	158	2e-37
Unigene1073_Taxus	536	37	5.9675	gi|15231611|ref|NP_189306.1|	53.5	1e-15	glycosyl hydrolase family 38 protein [Arabidopsis thaliana] >gi|1888357|emb|CAA66821.1| alpha-mannosidase [Arabidopsis thaliana] >gi|1890154|emb|CAA72432.1| alpha-mannosidase precursor [Arabidopsis thaliana] >gi|11994305|dbj|BAB01735.1| alpha-mannosidase [Arabidopsis thaliana] >gi|14517403|gb|AAK62592.1| AT3g26720/MLJ15_12 [Arabidopsis thaliana] >gi|21360397|gb|AAM47314.1| AT3g26720/MLJ15_12 [Ara…	--	--	--
Unigene10740_Taxus	693	48	5.9877	gi|115469330|ref|NP_001058264.1|	82.4	6e-29	Os06g0659400 [Oryza sativa (japonica cultivar-group)] >gi|51536173|dbj|BAD38346.1| lustrin A-like [Oryza sativa Japonica Group] >gi|52077362|dbj|BAD46402.1| lustrin A-like [Oryza sativa Japonica Group] >gi|113596304|dbj|BAF20178.1| Os06g0659400 [Oryza sativa Japonica Group]	--	--	--
Unigene10741_Taxus	1170	182	13.4474	gi|54261721|gb|AAV31164.1|	92	2e-17	At1g80060 [Arabidopsis thaliana] >gi|58331795|gb|AAW70395.1| At1g80060 [Arabidopsis thaliana]	Q8VIK1	56.6	3e-07
Unigene10742_Taxus	3258	540	14.3284	gi|115463441|ref|NP_001055320.1|	181	2e-58	Os05g0363500 [Oryza sativa (japonica cultivar-group)]	--	--	--
Unigene10743_Taxus	239	15	5.4256	--	--	--	--	--	--	--
Unigene10744_Taxus	1103	258	20.2208	gi|115478092|ref|NP_001062641.1|	44.3	4e-10	Os09g0135800 [Oryza sativa (japonica cultivar-group)] >gi|113630874|dbj|BAF24555.1| Os09g0135800 [Oryza sativa Japonica Group]	--	--	--
Unigene10745_Taxus	247	4	1.4	--	--	--	--	--	--	--
Unigene10746_Taxus	1412	132	8.0815	gi|18408755|ref|NP_566914.1|	149	3e-42	RNA polymerase III subunit RPC82 family protein [Arabidopsis thaliana] >gi|20466336|gb|AAM20485.1| RNA polymerase III subunit-like protein [Arabidopsis thaliana] >gi|34098883|gb|AAQ56824.1| At3g49000 [Arabidopsis thaliana]	Q2TBL4	85.5	8e-16
Unigene10747_Taxus	212	76	30.9907	--	--	--	--	--	--	--
Unigene10748_Taxus	380	13	2.9574	gi|75322263|sp|Q651U1.1|CRYD_ORYSJ	95.1	5e-25	RecName: Full=Cryptochrome DASH, chloroplastic/mitochondrial; Flags: Precursor	Q651U1	95.1	1e-25
Unigene10749_Taxus	432	18	3.602	gi|109727320|gb|ABG45945.1|	56.2	2e-07	DSK2 [Nicotiana tabacum]	--	--	--
Unigene1074_Taxus	646	141	18.8686	--	--	--	--	--	--	--
Unigene10750_Taxus	386	10	2.2396	gi|15223802|ref|NP_173449.1|	94.7	3e-30	pentatricopeptide (PPR) repeat-containing protein [Arabidopsis thaliana] >gi|193806503|sp|Q9LNU6.2|PPR53_ARATH RecName: Full=Pentatricopeptide repeat-containing protein At1g20230	Q9LNU6	94.7	1e-30
Unigene10751_Taxus	564	26	3.9852	gi|108864208|gb|ABA92485.2|	90.5	2e-17	RWP-RK domain containing protein, expressed [Oryza sativa (japonica cultivar-group)]	--	--	--
Unigene10752_Taxus	244	36	12.7546	--	--	--	--	--	--	--
Unigene10753_Taxus	713	57	6.911	gi|115440893|ref|NP_001044726.1|	49.3	6e-07	Os01g0835600 [Oryza sativa (japonica cultivar-group)]	--	--	--
Unigene10754_Taxus	247	3	1.05	--	--	--	--	--	--	--
Unigene10755_Taxus	345	81	20.2964	--	--	--	--	--	--	--
Unigene10756_Taxus	248	27	9.4116	--	--	--	--	--	--	--
Unigene10757_Taxus	485	16	2.8519	--	--	--	--	--	--	--
Unigene10758_Taxus	279	8	2.4788	--	--	--	--	--	--	--
Unigene10759_Taxus	1238	228	15.9209	gi|270254705|emb|CBI37095.1|	59.7	1e-07	unnamed protein product [Vitis vinifera]	--	--	--
Unigene1075_Taxus	226	5	1.9126	--	--	--	--	--	--	--
Unigene10760_Taxus	296	134	39.1351	gi|222822566|gb|ACM68432.1|	81.3	6e-15	xyloglucanase-specific endoglucanase inhibitor protein [Petunia x hybrida]	--	--	--
Unigene10761_Taxus	243	16	5.692	--	--	--	--	--	--	--
Unigene10762_Taxus	436	43	8.5258	--	--	--	--	--	--	--
Unigene10763_Taxus	581	28	4.1662	gi|87162616|gb|ABD28411.1|	83.2	3e-15	C33G8.2 , related [Medicago truncatula]	Q55FI4	81.3	4e-15
Unigene10764_Taxus	252	6	2.0583	--	--	--	--	--	--	--
Unigene10765_Taxus	742	44	5.1263	gi|255552944|ref|XP_002517515.1|	118	1e-31	vacuolar protein sorting-associated protein, putative [Ricinus communis] >gi|223543526|gb|EEF45057.1| vacuolar protein sorting-associated protein, putative [Ricinus communis]	--	--	--
Unigene10766_Taxus	349	50	12.3851	gi|227204171|dbj|BAH56937.1|	59.7	2e-08	AT2G23740 [Arabidopsis thaliana]	O64827	59.7	5e-09
Unigene10767_Taxus	244	16	5.6687	--	--	--	--	--	--	--
Unigene10768_Taxus	234	18	6.6498	--	--	--	--	--	--	--
Unigene10769_Taxus	274	18	5.679	gi|225464130|ref|XP_002264979.1|	73.9	9e-13	PREDICTED: similar to NFU4 (NFU domain protein 4) [Vitis vinifera]	Q9LIG6	70.1	4e-12
Unigene1076_Taxus	3681	669	15.7114	gi|115442229|ref|NP_001045394.1|	300	2e-79	Os01g0948500 [Oryza sativa (japonica cultivar-group)] >gi|22830929|dbj|BAC15794.1| armadillo repeat-containing protein-like [Oryza sativa Japonica Group] >gi|113534925|dbj|BAF07308.1| Os01g0948500 [Oryza sativa Japonica Group]	Q9SFX2	247	4e-64
Unigene10770_Taxus	324	30	8.0044	--	--	--	--	--	--	--
Unigene10771_Taxus	766	53	5.9814	gi|11181952|emb|CAC16135.1|	223	3e-57	endonuclease III homologue [Arabidopsis thaliana]	O35980	150	1e-35
Unigene10772_Taxus	253	7	2.3918	--	--	--	--	--	--	--
Unigene10773_Taxus	805	174	18.6856	gi|31711868|gb|AAP68290.1|	117	4e-31	At3g12156 [Arabidopsis thaliana]	--	--	--
Unigene10774_Taxus	1358	179	11.3948	gi|226502092|ref|NP_001149455.1|	207	3e-67	cupin, RmlC-type [Zea mays] >gi|195627356|gb|ACG35508.1| cupin, RmlC-type [Zea mays]	Q96SZ5	86.3	5e-16
Unigene10775_Taxus	551	27	4.2361	--	--	--	--	--	--	--
Unigene10776_Taxus	427	147	29.7607	gi|116309820|emb|CAH66857.1|	59.7	2e-08	H0307D04.2 [Oryza sativa (indica cultivar-group)]	--	--	--
Unigene10777_Taxus	254	4	1.3614	--	--	--	--	--	--	--
Unigene10778_Taxus	258	9	3.0156	gi|166863145|gb|ABZ01439.1|	82	2e-33	proliferating cell nuclear antigen [Pinus taeda] >gi|166863147|gb|ABZ01440.1| proliferating cell nuclear antigen [Pinus taeda] >gi|166863149|gb|ABZ01441.1| proliferating cell nuclear antigen [Pinus taeda] >gi|166863151|gb|ABZ01442.1| proliferating cell nuclear antigen [Pinus taeda] >gi|166863153|gb|ABZ01443.1| proliferating cell nuclear antigen [Pinus taeda] >gi|166863155|gb|ABZ01444.1| prolifera…	Q9M7Q7	79.3	3e-32
Unigene10779_Taxus	1508	453	25.9687	gi|225438676|ref|XP_002282060.1|	251	1e-117	PREDICTED: similar to MAP1D (METHIONINE AMINOPEPTIDASE 1D); metalloexopeptidase [Vitis vinifera]	Q9FV50	262	1e-116
Unigene1077_Taxus	1036	86	7.1762	gi|115462929|ref|NP_001055064.1|	183	1e-103	Os05g0272200 [Oryza sativa (japonica cultivar-group)]	--	--	--
Unigene10780_Taxus	473	128	23.3939	--	--	--	--	--	--	--
Unigene10781_Taxus	236	12	4.3956	gi|255676676|dbj|BAF18566.2|	60.5	1e-08	Os06g0125600 [Oryza sativa Japonica Group]	Q9LNU6	57	3e-08
Unigene10782_Taxus	518	67	11.1815	gi|148908549|gb|ABR17384.1|	163	1e-39	unknown [Picea sitchensis]	--	--	--
Unigene10783_Taxus	537	282	45.3971	--	--	--	--	--	--	--
Unigene10784_Taxus	248	6	2.0915	--	--	--	--	--	--	--
Unigene10785_Taxus	850	54	5.492	gi|115477076|ref|NP_001062134.1|	236	8e-82	Os08g0496000 [Oryza sativa (japonica cultivar-group)] >gi|113624103|dbj|BAF24048.1| Os08g0496000 [Oryza sativa Japonica Group]	Q8BJ03	130	5e-39
Unigene10786_Taxus	563	35	5.3742	gi|115484731|ref|NP_001067509.1|	285	3e-76	Os11g0216300 [Oryza sativa (japonica cultivar-group)] >gi|113644731|dbj|BAF27872.1| Os11g0216300 [Oryza sativa Japonica Group]	Q8RWG1	268	2e-71
Unigene10787_Taxus	245	4	1.4114	--	--	--	--	--	--	--
Unigene10788_Taxus	457	20	3.7833	gi|168002367|ref|XP_001753885.1|	55.5	3e-07	predicted protein [Physcomitrella patens subsp. patens] >gi|162694861|gb|EDQ81207.1| predicted protein [Physcomitrella patens subsp. patens]	--	--	--
Unigene10789_Taxus	243	16	5.692	--	--	--	--	--	--	--
Unigene1078_Taxus	221	1	0.3912	--	--	--	--	--	--	--
Unigene10790_Taxus	1227	192	13.5273	gi|42567655|ref|NP_196133.3|	75.1	3e-12	transcription elongation factor-related [Arabidopsis thaliana]	--	--	--
Unigene10791_Taxus	220	5	1.9647	--	--	--	--	--	--	--
Unigene10792_Taxus	298	15	4.3514	--	--	--	--	--	--	--
Unigene10793_Taxus	3559	752	18.266	gi|224102121|ref|XP_002312555.1|	1289	0	argonaute protein group [Populus trichocarpa] >gi|222852375|gb|EEE89922.1| argonaute protein group [Populus trichocarpa]	Q69VD5	1276	0
Unigene10794_Taxus	313	15	4.1429	--	--	--	--	--	--	--
Unigene10795_Taxus	4844	2196	39.1906	gi|115440139|ref|NP_001044349.1|	259	4e-67	Os01g0765300 [Oryza sativa (japonica cultivar-group)]	P21260	96.3	2e-18
Unigene10796_Taxus	533	34	5.5145	gi|116785532|gb|ABK23762.1|	61.6	8e-09	unknown [Picea sitchensis]	--	--	--
Unigene10797_Taxus	311	117	32.5221	--	--	--	--	--	--	--
Unigene10798_Taxus	542	27	4.3064	--	--	--	--	--	--	--
Unigene10799_Taxus	280	78	24.0819	--	--	--	--	--	--	--
Unigene1079_Taxus	1297	103	6.8652	gi|255588687|ref|XP_002534687.1|	68.9	2e-10	NADH-ubiquinone oxidoreductase chain, putative [Ricinus communis] >gi|223524771|gb|EEF27701.1| NADH-ubiquinone oxidoreductase chain, putative [Ricinus communis]	--	--	--
Unigene107_Taxus	2219	1488	57.9694	gi|30681754|ref|NP_196329.2|	676	0	SNX2b (SORTING NEXIN 2b); phosphoinositide binding / protein binding [Arabidopsis thaliana] >gi|222423233|dbj|BAH19593.1| AT5G07120 [Arabidopsis thaliana]	Q5R9A9	114	2e-24
Unigene10800_Taxus	1649	504	26.4219	gi|255678843|dbj|BAH94532.1|	108	3e-22	Os09g0370500 [Oryza sativa Japonica Group]	A8MUU9	52.8	7e-06
Unigene10801_Taxus	235	6	2.2072	gi|255670608|dbj|BAH91533.1|	49.7	2e-08	Os02g0151000 [Oryza sativa Japonica Group]	Q9LN01	50.8	6e-09
Unigene10802_Taxus	525	33	5.4339	--	--	--	--	--	--	--
Unigene10803_Taxus	781	448	49.5884	gi|116781715|gb|ABK22213.1|	58.9	1e-07	unknown [Picea sitchensis] >gi|148910299|gb|ABR18229.1| unknown [Picea sitchensis]	--	--	--
Unigene10804_Taxus	248	6	2.0915	--	--	--	--	--	--	--
Unigene10805_Taxus	2455	952	33.5227	gi|18424524|ref|NP_568944.1|	671	0	BON1 (BONZAI 1); calcium-dependent phospholipid binding [Arabidopsis thaliana] >gi|42573762|ref|NP_974977.1| BON1 (BONZAI 1); calcium-dependent phospholipid binding [Arabidopsis thaliana] >gi|9758389|dbj|BAB08876.1| copine-like protein [Arabidopsis thaliana] >gi|17065496|gb|AAL32902.1| copine-like protein [Arabidopsis thaliana] >gi|21553477|gb|AAM62570.1| copine-like protein [Arabidopsis thaliana…	O75131	365	1e-100
Unigene10806_Taxus	3376	1726	44.1969	gi|2970447|gb|AAC05981.1|	1323	0	aspartokinase-homoserine dehydrogenase [Glycine max]	O81852	1310	0
Unigene10807_Taxus	346	23	5.7465	gi|255674992|dbj|BAH92408.1|	85.5	3e-16	Os03g0807500 [Oryza sativa Japonica Group]	P80728	79.7	5e-15
Unigene10808_Taxus	720	285	34.2189	gi|18413298|ref|NP_567352.1|	108	8e-23	CNX7; catalytic [Arabidopsis thaliana] >gi|30681325|ref|NP_849354.1| CNX7; catalytic [Arabidopsis thaliana] >gi|145333001|ref|NP_001078366.1| CNX7; catalytic [Arabidopsis thaliana] >gi|75265357|sp|Q9S7A3.1|MOC2A_ARATH RecName: Full=Molybdopterin synthase sulfur carrier subunit; AltName: Full=Sulfur carrier protein MOCS2A; AltName: Full=Molybdenum cofactor synthesis protein 2A; Short=MOCS2A; AltNa…	Q9S7A3	108	3e-23
Unigene10809_Taxus	923	94	8.804	gi|148887785|gb|ABR15468.1|	347	3e-94	GDP-mannose pyrophosphorylase [Pinus taeda]	Q54K39	244	5e-64
Unigene1080_Taxus	231	3	1.1227	--	--	--	--	--	--	--
Unigene10810_Taxus	4882	1412	25.0029	gi|124359633|gb|ABD32307.2|	546	1e-153	Nuclear factor related to kappa-B-binding protein , related [Medicago truncatula]	Q6P4R8	171	5e-41
Unigene10811_Taxus	440	19	3.733	gi|156556172|emb|CAO94660.1|	179	2e-44	Multidrug Resistance associated Protein 1 [Catharanthus roseus]	Q9SKX0	161	1e-39
Unigene10812_Taxus	256	14	4.7276	gi|18400953|ref|NP_565610.1|	71.2	4e-20	YebC-related [Arabidopsis thaliana] >gi|22096384|sp|O82314.2|U082_ARATH RecName: Full=UPF0082 protein At2g25830 >gi|20197365|gb|AAC42247.2| expressed protein [Arabidopsis thaliana]	O82314	71.2	1e-20
Unigene10813_Taxus	277	11	3.4329	--	--	--	--	--	--	--
Unigene10814_Taxus	336	7	1.801	gi|255679791|dbj|BAF27596.2|	60.5	1e-08	Os11g0148700 [Oryza sativa Japonica Group]	--	--	--
Unigene10815_Taxus	317	23	6.2722	--	--	--	--	--	--	--
Unigene10816_Taxus	2127	823	33.4492	gi|42741727|gb|AAS45124.1|	421	1e-116	WAK-like kinase [Solanum lycopersicum]	Q8RY67	416	1e-115
Unigene10817_Taxus	1107	347	27.0979	gi|15223392|ref|NP_171646.1|	250	5e-65	UDP-glucoronosyl/UDP-glucosyl transferase family protein [Arabidopsis thaliana] >gi|17065184|gb|AAL32746.1| Putative UTP-glucose glucosyltransferase [Arabidopsis thaliana] >gi|27311947|gb|AAO00939.1| Putative UTP-glucose glucosyltransferase [Arabidopsis thaliana]	Q9M156	240	1e-62
Unigene10818_Taxus	344	24	6.0312	gi|225452634|ref|XP_002276408.1|	57	4e-24	PREDICTED: similar to ABC transporter family protein [Vitis vinifera]	Q9LSJ6	57	1e-24
Unigene10819_Taxus	1193	897	64.9988	gi|226505058|ref|NP_001146955.1|	229	7e-59	LOC100280564 [Zea mays] >gi|195605816|gb|ACG24738.1| trafficking protein particle complex protein 2 [Zea mays] >gi|195648512|gb|ACG43724.1| trafficking protein particle complex protein 2 [Zea mays]	Q3T0F2	138	7e-32
Unigene1081_Taxus	223	7	2.7136	--	--	--	--	--	--	--
Unigene10820_Taxus	684	35	4.4235	--	--	--	--	--	--	--
Unigene10821_Taxus	2734	337	10.6558	gi|15221411|ref|NP_177623.1|	449	1e-163	PTAC2 (PLASTID TRANSCRIPTIONALLY ACTIVE2) [Arabidopsis thaliana] >gi|75194055|sp|Q9S7Q2.1|PP124_ARATH RecName: Full=Pentatricopeptide repeat-containing protein At1g74850, chloroplastic; AltName: Full=Protein PLASTID TRANSCRIPTIONALLY ACTIVE 2; Flags: Precursor >gi|5882738|gb|AAD55291.1|AC008263_22 Contains 3 PF|01535 DUF17 domains [Arabidopsis thaliana]	Q9S7Q2	449	1e-163
Unigene10822_Taxus	277	26	8.1142	--	--	--	--	--	--	--
Unigene10823_Taxus	253	13	4.442	--	--	--	--	--	--	--
Unigene10824_Taxus	396	60	13.0981	--	--	--	--	--	--	--
Unigene10825_Taxus	550	30	4.7153	gi|37202106|gb|AAQ89668.1|	122	5e-27	At1g77230 [Arabidopsis thaliana]	Q6DI40	75.5	2e-13
Unigene10826_Taxus	252	12	4.1166	gi|148910426|gb|ABR18289.1|	63.2	8e-11	unknown [Picea sitchensis]	--	--	--
Unigene10827_Taxus	369	124	29.0502	gi|186523158|ref|NP_197072.3|	168	3e-41	binding [Arabidopsis thaliana]	--	--	--
Unigene10828_Taxus	1410	115	7.0507	gi|115484435|ref|NP_001065879.1|	186	1e-77	Os11g0175500 [Oryza sativa (japonica cultivar-group)] >gi|62733686|gb|AAX95797.1| At1g47570 [Oryza sativa Japonica Group] >gi|77548913|gb|ABA91710.1| Zinc finger, C3HC4 type family protein, expressed [Oryza sativa (japonica cultivar-group)]	A5WW08	77	3e-13
Unigene10829_Taxus	661	243	31.7803	--	--	--	--	--	--	--
Unigene1082_Taxus	238	21	7.6277	--	--	--	--	--	--	--
Unigene10830_Taxus	375	29	6.6853	gi|186523158|ref|NP_197072.3|	158	3e-38	binding [Arabidopsis thaliana]	--	--	--
Unigene10831_Taxus	253	14	4.7837	gi|115486243|ref|NP_001068265.1|	65.9	3e-22	Os11g0610900 [Oryza sativa (japonica cultivar-group)] >gi|108864576|gb|ABA94784.2| seryl-tRNA synthetase family protein, expressed [Oryza sativa (japonica cultivar-group)] >gi|113645487|dbj|BAF28628.1| Os11g0610900 [Oryza sativa Japonica Group]	Q662D8	50.8	2e-10
Unigene10832_Taxus	635	43	5.8539	gi|115489794|ref|NP_001067384.1|	96.3	4e-19	Os12g0638900 [Oryza sativa (japonica cultivar-group)] >gi|113649891|dbj|BAF30403.1| Os12g0638900 [Oryza sativa Japonica Group]	O81908	91.3	4e-18
Unigene10833_Taxus	207	12	5.0115	--	--	--	--	--	--	--
Unigene10834_Taxus	409	11	2.325	gi|186523129|ref|NP_197058.2|	70.5	2e-17	EMB2773 (EMBRYO DEFECTIVE 2773); binding / protein binding / zinc ion binding [Arabidopsis thaliana] >gi|146230097|gb|ABQ12620.1| sister chromatid cohesion 2 [Arabidopsis thaliana]	--	--	--
Unigene10835_Taxus	422	47	9.6281	gi|39545748|emb|CAD41727.3|	65.5	3e-10	OSJNBb0034I13.14 [Oryza sativa (japonica cultivar-group)]	--	--	--
Unigene10836_Taxus	432	127	25.414	--	--	--	--	--	--	--
Unigene10837_Taxus	1261	286	19.6067	gi|34850849|dbj|BAC87862.1|	144	1e-63	steroid 5alpha-reductase [Ipomoea nil]	Q38944	132	7e-58
Unigene10838_Taxus	434	8	1.5935	gi|168052882|ref|XP_001778868.1|	51.2	6e-06	predicted protein [Physcomitrella patens subsp. patens] >gi|162669737|gb|EDQ56318.1| predicted protein [Physcomitrella patens subsp. patens]	--	--	--
Unigene10839_Taxus	472	56	10.2565	gi|186523158|ref|NP_197072.3|	196	1e-49	binding [Arabidopsis thaliana]	--	--	--
Unigene1083_Taxus	251	12	4.133	--	--	--	--	--	--	--
Unigene10840_Taxus	280	32	9.8797	--	--	--	--	--	--	--
Unigene10841_Taxus	906	107	10.2096	gi|149240431|ref|XP_001526091.1|	119	7e-26	NHP2/L7aE family protein [Lodderomyces elongisporus NRRL YB-4239] >gi|146450214|gb|EDK44470.1| NHP2/L7aE family protein [Lodderomyces elongisporus NRRL YB-4239]	Q5ANL6	117	8e-26
Unigene10842_Taxus	280	11	3.3962	--	--	--	--	--	--	--
Unigene10843_Taxus	260	12	3.9899	--	--	--	--	--	--	--
Unigene10844_Taxus	242	18	6.43	gi|115451645|ref|NP_001049423.1|	55.1	2e-13	Os03g0223100 [Oryza sativa (japonica cultivar-group)] >gi|108706919|gb|ABF94714.1| Cytochrome P450 family protein, expressed [Oryza sativa (japonica cultivar-group)] >gi|113547894|dbj|BAF11337.1| Os03g0223100 [Oryza sativa Japonica Group]	O81117	54.3	2e-12
Unigene10845_Taxus	337	16	4.1043	--	--	--	--	--	--	--
Unigene10846_Taxus	223	2	0.7753	--	--	--	--	--	--	--
Unigene10847_Taxus	247	16	5.5999	gi|224057048|ref|XP_002299117.1|	110	9e-24	neutral amino acid transport protein [Populus trichocarpa] >gi|222846375|gb|EEE83922.1| neutral amino acid transport protein [Populus trichocarpa]	--	--	--
Unigene10848_Taxus	569	67	10.1793	--	--	--	--	--	--	--
Unigene10849_Taxus	421	34	6.9815	gi|224094531|ref|XP_002310176.1|	41.2	3e-06	predicted protein [Populus trichocarpa] >gi|222853079|gb|EEE90626.1| predicted protein [Populus trichocarpa]	--	--	--
Unigene1084_Taxus	479	37	6.6776	--	--	--	--	--	--	--
Unigene10850_Taxus	251	9	3.0997	gi|15230441|ref|NP_190697.1|	40.8	1e-08	proline-rich family protein [Arabidopsis thaliana]	--	--	--
Unigene10851_Taxus	1026	92	7.7516	gi|79586698|ref|NP_680116.2|	104	4e-30	REF6 (RELATIVE OF EARLY FLOWERING 6); nucleic acid binding / transcription factor/ zinc ion binding [Arabidopsis thaliana] >gi|50513173|gb|AAT77779.1| relative of early flowering 6 [Arabidopsis thaliana]	--	--	--
Unigene10852_Taxus	1281	458	30.9079	gi|113531030|emb|CAL25300.1|	434	1e-120	properoxidase [Picea abies]	A7NY33	388	1e-107
Unigene10853_Taxus	1203	114	8.1921	gi|5545339|dbj|BAA82556.1|	271	1e-82	lectin-like protein kinase [Populus nigra]	Q9M021	208	1e-54
Unigene10854_Taxus	480	61	10.9861	gi|13605607|gb|AAK32797.1|AF361629_1	90.5	1e-17	T3B23.2/T3B23.2 [Arabidopsis thaliana] >gi|19548083|gb|AAL87406.1| T3B23.2/T3B23.2 [Arabidopsis thaliana]	Q84MC2	73.2	7e-13
Unigene10855_Taxus	247	4	1.4	--	--	--	--	--	--	--
Unigene10856_Taxus	251	9	3.0997	--	--	--	--	--	--	--
Unigene10857_Taxus	1834	613	28.8945	gi|115467214|ref|NP_001057206.1|	112	2e-23	Os06g0227200 [Oryza sativa (japonica cultivar-group)] >gi|113595246|dbj|BAF19120.1| Os06g0227200 [Oryza sativa Japonica Group]	P37707	72.8	8e-12
Unigene10858_Taxus	686	38	4.7886	gi|115481094|ref|NP_001064140.1|	101	2e-20	Os10g0140200 [Oryza sativa (japonica cultivar-group)] >gi|113638749|dbj|BAF26054.1| Os10g0140200 [Oryza sativa Japonica Group]	O09159	97.8	6e-20
Unigene10859_Taxus	714	37	4.4798	gi|115462939|ref|NP_001055069.1|	80.9	2e-14	Os05g0273800 [Oryza sativa (japonica cultivar-group)] >gi|113578620|dbj|BAF16983.1| Os05g0273800 [Oryza sativa Japonica Group]	O31581	85.5	4e-22
Unigene1085_Taxus	296	23	6.7172	--	--	--	--	--	--	--
Unigene10860_Taxus	1095	71	5.6053	--	--	--	--	--	--	--
Unigene10861_Taxus	236	32	11.7217	--	--	--	--	--	--	--
Unigene10862_Taxus	251	10	3.4441	--	--	--	--	--	--	--
Unigene10863_Taxus	2465	313	10.9769	gi|115448163|ref|NP_001047861.1|	96.7	1e-24	Os02g0704600 [Oryza sativa (japonica cultivar-group)] >gi|113537392|dbj|BAF09775.1| Os02g0704600 [Oryza sativa Japonica Group]	--	--	--
Unigene10864_Taxus	566	47	7.1785	gi|19699290|gb|AAL91256.1|	223	1e-57	At1g15070/F9L1_1 [Arabidopsis thaliana] >gi|24111379|gb|AAN46813.1| At1g15070/F9L1_1 [Arabidopsis thaliana]	--	--	--
Unigene10865_Taxus	511	51	8.6279	gi|7528270|gb|AAF63202.1|AF240679_1	150	3e-41	poly(A)-binding protein [Cucumis sativus]	Q13310	152	8e-44
Unigene10866_Taxus	751	206	23.7127	gi|15239179|ref|NP_196179.1|	257	2e-67	oxidoreductase, 2OG-Fe(II) oxygenase family protein [Arabidopsis thaliana] >gi|10178137|dbj|BAB11549.1| leucoanthocyanidin dioxygenase-like protein [Arabidopsis thaliana] >gi|14532538|gb|AAK63997.1| AT5g05600/MOP10_14 [Arabidopsis thaliana] >gi|22137300|gb|AAM91495.1| AT5g05600/MOP10_14 [Arabidopsis thaliana]	A2Z1W9	157	5e-38
Unigene10867_Taxus	460	14	2.631	--	--	--	--	--	--	--
Unigene10868_Taxus	263	678	222.858	gi|209171772|dbj|BAG74565.1|	84.3	6e-16	alkaline alpha galactosidase [Tetragonia tetragonioides]	Q84VX0	74.7	2e-13
Unigene10869_Taxus	1913	461	20.8324	gi|15228767|ref|NP_191806.1|	303	1e-142	pentatricopeptide (PPR) repeat-containing protein [Arabidopsis thaliana] >gi|75181319|sp|Q9LZP3.1|PP293_ARATH RecName: Full=Pentatricopeptide repeat-containing protein At3g62470, mitochondrial; Flags: Precursor >gi|34365579|gb|AAQ65101.1| At3g62470 [Arabidopsis thaliana]	Q9LZP3	303	1e-143
Unigene1086_Taxus	512	73	12.3256	gi|18419759|ref|NP_567995.1|	86.7	2e-16	senescence/dehydration-associated protein-related [Arabidopsis thaliana]	--	--	--
Unigene10870_Taxus	403	43	9.2239	--	--	--	--	--	--	--
Unigene10871_Taxus	1044	120	9.9365	gi|111074466|gb|ABH04606.1|	133	6e-30	At2g28130 [Arabidopsis thaliana]	--	--	--
Unigene10872_Taxus	3758	1342	30.8709	gi|18405423|ref|NP_566820.1|	1015	0	GC6 (golgin candidate 6); binding / protein transporter [Arabidopsis thaliana] >gi|205785974|sp|B0F9L4.2|GOGC6_ARATH RecName: Full=Golgin candidate 6; Short=AtGC6	B0F9L4	1015	0
Unigene10873_Taxus	304	24	6.8248	--	--	--	--	--	--	--
Unigene10874_Taxus	1171	166	12.2548	gi|927575|gb|AAA73963.1|	338	1e-157	alpha galactosidase [Glycine max]	P14749	323	1e-151
Unigene10875_Taxus	229	10	3.775	--	--	--	--	--	--	--
Unigene10876_Taxus	377	33	7.567	--	--	--	--	--	--	--
Unigene10877_Taxus	481	34	6.1106	gi|224066515|ref|XP_002302118.1|	40	1e-06	predicted protein [Populus trichocarpa] >gi|222843844|gb|EEE81391.1| predicted protein [Populus trichocarpa]	--	--	--
Unigene10878_Taxus	542	142	22.6487	--	--	--	--	--	--	--
Unigene10879_Taxus	829	630	65.6961	gi|115467116|ref|NP_001057157.1|	142	1e-32	Os06g0218600 [Oryza sativa (japonica cultivar-group)] >gi|113595197|dbj|BAF19071.1| Os06g0218600 [Oryza sativa Japonica Group]	Q41001	128	4e-29
Unigene1087_Taxus	465	44	8.18	gi|115465976|ref|NP_001056587.1|	69.7	6e-15	Os06g0111600 [Oryza sativa (japonica cultivar-group)]	Q70LM4	51.6	4e-08
Unigene10880_Taxus	724	108	12.8955	gi|18399840|ref|NP_565522.1|	214	2e-54	SKIP6 (SKP1 interacting partner 6); ubiquitin-protein ligase [Arabidopsis thaliana] >gi|75206206|sp|Q9SJ04.1|SKIP6_ARATH RecName: Full=F-box/kelch-repeat protein SKIP6; AltName: Full=SKP1-interacting partner 6	Q9SJ04	214	6e-55
Unigene10881_Taxus	1636	770	40.6875	gi|15010688|gb|AAK74003.1|	241	4e-62	AT5g39790/MKM21_80 [Arabidopsis thaliana] >gi|16974327|gb|AAL31148.1| AT5g39790/MKM21_80 [Arabidopsis thaliana]	--	--	--
Unigene10882_Taxus	251	12	4.133	gi|18450363|gb|AAK82505.2|	60.1	7e-18	AT5g43400/MWF20_9 [Arabidopsis thaliana] >gi|25090369|gb|AAN72286.1| At5g43400/MWF20_9 [Arabidopsis thaliana]	--	--	--
Unigene10883_Taxus	484	56	10.0022	--	--	--	--	--	--	--
Unigene10884_Taxus	237	5	1.8238	--	--	--	--	--	--	--
Unigene10885_Taxus	295	3	0.8791	gi|7406421|emb|CAB85530.1|	97.4	7e-20	ribonuclease II-like protein [Arabidopsis thaliana]	--	--	--
Unigene10886_Taxus	3727	890	20.6435	gi|229270215|gb|ACQ55238.1|	1127	0	physcodillo-2 [Physcomitrella patens]	O22161	1118	0
Unigene10887_Taxus	232	12	4.4714	--	--	--	--	--	--	--
Unigene10888_Taxus	267	18	5.8279	--	--	--	--	--	--	--
Unigene10889_Taxus	1765	202	9.8937	gi|9955579|emb|CAC05506.1|	406	1e-112	zinc finger protein-like [Arabidopsis thaliana]	Q5XUN4	114	3e-24
Unigene1088_Taxus	230	5	1.8793	gi|148595762|emb|CAM90411.1|	52.8	2e-06	HAK3 potassium transporter [Physcomitrella patens]	Q6H4R6	51.2	2e-06
Unigene10890_Taxus	334	21	5.4353	--	--	--	--	--	--	--
Unigene10891_Taxus	305	23	6.519	gi|48310199|gb|AAT41773.1|	71.6	4e-12	At5g24600 [Arabidopsis thaliana] >gi|50198891|gb|AAT70465.1| At5g24600 [Arabidopsis thaliana]	--	--	--
Unigene10892_Taxus	4516	950	18.1854	gi|240254318|ref|NP_176659.6|	1283	0	binding [Arabidopsis thaliana]	Q92616	825	0
Unigene10893_Taxus	379	36	8.2114	--	--	--	--	--	--	--
Unigene10894_Taxus	1302	341	22.6411	gi|30685230|ref|NP_193817.2|	254	1e-71	TPP2 (TRIPEPTIDYL PEPTIDASE II); tripeptidyl-peptidase [Arabidopsis thaliana]	Q64514	111	1e-23
Unigene10895_Taxus	4786	1858	33.5604	gi|115476512|ref|NP_001061852.1|	142	8e-32	Os08g0430000 [Oryza sativa (japonica cultivar-group)] >gi|113623821|dbj|BAF23766.1| Os08g0430000 [Oryza sativa Japonica Group]	Q75JC9	91.3	6e-17
Unigene10896_Taxus	499	37	6.41	gi|30678662|ref|NP_171872.2|	46.6	1e-09	prefoldin subunit family protein [Arabidopsis thaliana]	--	--	--
Unigene10897_Taxus	418	23	4.7567	--	--	--	--	--	--	--
Unigene10898_Taxus	258	3	1.0052	--	--	--	--	--	--	--
Unigene10899_Taxus	258	20	6.7014	--	--	--	--	--	--	--
Unigene1089_Taxus	1143	618	46.7408	--	--	--	--	--	--	--
Unigene108_Taxus	1595	212	11.4902	--	--	--	--	--	--	--
Unigene10900_Taxus	256	10	3.3769	--	--	--	--	--	--	--
Unigene10901_Taxus	2181	267	10.583	gi|37983539|gb|AAR06289.1|	722	0	5-phosphoribosyl-1-pyrophosphate amidotransferase [Nicotiana tabacum]	P52419	699	0
Unigene10902_Taxus	725	348	41.4949	gi|90704799|dbj|BAE92294.1|	229	3e-59	similarity to ribonuclease III [Cryptomeria japonica]	A9BNJ5	62	4e-09
Unigene10903_Taxus	246	11	3.8655	--	--	--	--	--	--	--
Unigene10904_Taxus	615	69	9.699	gi|30688336|ref|NP_030605.2|	94.7	1e-18	appr-1-p processing enzyme family protein [Arabidopsis thaliana]	A1Z1Q3	59.7	1e-08
Unigene10905_Taxus	2614	601	19.8757	gi|15219287|ref|NP_173107.1|	412	1e-113	SR45; RNA binding / protein binding [Arabidopsis thaliana] >gi|6601502|gb|AAF19004.1|AF151366_1 arginine/serine-rich protein [Arabidopsis thaliana] >gi|9989058|gb|AAG10821.1|AC011808_9 arginine/serine-rich protein [Arabidopsis thaliana] >gi|56382017|gb|AAV85727.1| At1g16610 [Arabidopsis thaliana]	Q5ZMJ9	145	1e-33
Unigene10906_Taxus	601	54	7.7673	gi|115454375|ref|NP_001050788.1|	242	3e-63	Os03g0650900 [Oryza sativa (japonica cultivar-group)] >gi|62733417|gb|AAX95534.1| Putative SPX protein [Oryza sativa Japonica Group] >gi|108710124|gb|ABF97919.1| SPX domain containing protein, expressed [Oryza sativa (japonica cultivar-group)] >gi|113549259|dbj|BAF12702.1| Os03g0650900 [Oryza sativa Japonica Group]	Q9SRX9	220	4e-57
Unigene10907_Taxus	250	13	4.4953	--	--	--	--	--	--	--
Unigene10908_Taxus	2179	266	10.553	gi|115452171|ref|NP_001049686.1|	211	6e-53	Os03g0270700 [Oryza sativa (japonica cultivar-group)] >gi|113548157|dbj|BAF11600.1| Os03g0270700 [Oryza sativa Japonica Group]	Q9SRE5	195	1e-48
Unigene10909_Taxus	3150	345	9.4681	gi|224095776|ref|XP_002310475.1|	321	6e-86	SET domain protein [Populus trichocarpa] >gi|222853378|gb|EEE90925.1| SET domain protein [Populus trichocarpa]	O23372	306	6e-82
Unigene1090_Taxus	239	2	0.7234	gi|75219736|sp|O50017.1|PARP2_MAIZE	59.3	1e-14	RecName: Full=Poly [ADP-ribose] polymerase 2; Short=PARP-2; AltName: Full=NAD(+) ADP-ribosyltransferase 2; Short=ADPRT-2; AltName: Full=Poly[ADP-ribose] synthetase 2 >gi|2959360|emb|CAA10888.1| poly(ADP-ribose) polymerase [Zea mays]	O50017	59.3	5e-15
Unigene10910_Taxus	262	9	2.9696	--	--	--	--	--	--	--
Unigene10911_Taxus	363	47	11.193	gi|164375553|gb|ABY52943.1|	54.7	6e-13	argonaute/Zwille-like protein 1 [Brassica napus]	Q9XGW1	54.7	4e-13
Unigene10912_Taxus	254	8	2.7228	--	--	--	--	--	--	--
Unigene10913_Taxus	481	35	6.2904	--	--	--	--	--	--	--
Unigene10914_Taxus	289	756	226.14	--	--	--	--	--	--	--
Unigene10915_Taxus	258	6	2.0104	--	--	--	--	--	--	--
Unigene10916_Taxus	263	20	6.574	--	--	--	--	--	--	--
Unigene10917_Taxus	263	15	4.9305	--	--	--	--	--	--	--
Unigene10918_Taxus	269	29	9.3196	--	--	--	--	--	--	--
Unigene10919_Taxus	2401	479	17.2463	gi|229609723|gb|ACQ83477.1|	268	1e-161	CBL-interacting protein kinase 05 [Physcomitrella patens]	Q93VD3	275	1e-159
Unigene1091_Taxus	939	120	11.0476	--	--	--	--	--	--	--
Unigene10920_Taxus	294	35	10.2914	--	--	--	--	--	--	--
Unigene10921_Taxus	656	274	36.1077	gi|18033737|gb|AAL57228.1|	61.2	2e-08	protein kinase-like protein [Capsicum annuum]	--	--	--
Unigene10922_Taxus	2024	429	18.3232	gi|254567537|ref|XP_002490879.1|	87.4	1e-15	Mucin-like protein [Pichia pastoris GS115] >gi|238030675|emb|CAY68599.1| Mucin-like protein [Pichia pastoris GS115]	Q54G05	57.8	3e-07
Unigene10923_Taxus	254	25	8.5086	--	--	--	--	--	--	--
Unigene10924_Taxus	429	59	11.8891	--	--	--	--	--	--	--
Unigene10925_Taxus	325	28	7.4478	--	--	--	--	--	--	--
Unigene10926_Taxus	1525	266	15.0787	gi|17369179|sp|Q9LSM5.1|SGT1_ARATH	378	1e-117	RecName: Full=Protein SGT1 homolog At5g65490	Q9LSM5	378	1e-117
Unigene10927_Taxus	747	86	9.9525	gi|115456649|ref|NP_001051925.1|	57.4	3e-07	Os03g0852600 [Oryza sativa (japonica cultivar-group)] >gi|113550396|dbj|BAF13839.1| Os03g0852600 [Oryza sativa Japonica Group]	O80813	57.4	1e-07
Unigene10928_Taxus	762	47	5.3321	gi|227206438|dbj|BAH57274.1|	97.1	4e-19	AT3G13690 [Arabidopsis thaliana]	--	--	--
Unigene10929_Taxus	858	70	7.0528	gi|108711620|gb|ABF99415.1|	80.9	3e-14	expressed protein [Oryza sativa (japonica cultivar-group)]	--	--	--
Unigene1092_Taxus	360	12	2.8816	--	--	--	--	--	--	--
Unigene10930_Taxus	251	4	1.3777	gi|229609815|gb|ACQ83523.1|	82.4	1e-27	CBL-interacting protein kinase 07 [Vitis vinifera]	Q5W736	78.2	2e-26
Unigene10931_Taxus	222	31	12.0715	--	--	--	--	--	--	--
Unigene10932_Taxus	404	48	10.271	gi|115489110|ref|NP_001067042.1|	209	1e-53	Os12g0564600 [Oryza sativa (japonica cultivar-group)] >gi|113649549|dbj|BAF30061.1| Os12g0564600 [Oryza sativa Japonica Group]	O60524	102	6e-22
Unigene10933_Taxus	592	46	6.7172	gi|8493576|gb|AAF75799.1|AC011000_2	174	8e-43	Contains weak similarity to T-type calcium channel isoform from Rattus norvegicus gb|AF125161. EST gb|R30034 comes from this gene [Arabidopsis thaliana]	--	--	--
Unigene10934_Taxus	237	6	2.1885	--	--	--	--	--	--	--
Unigene10935_Taxus	529	232	37.9128	gi|197310476|gb|ACH61589.1|	189	2e-47	tetraspanin [Pseudotsuga menziesii] >gi|197310512|gb|ACH61607.1| tetraspanin [Pseudotsuga menziesii] >gi|197310518|gb|ACH61610.1| tetraspanin [Pseudotsuga menziesii]	--	--	--
Unigene10936_Taxus	3385	604	15.4252	gi|8480758|sp|Q9ZPV5.1|NOC2L_ARATH	649	0	RecName: Full=Nucleolar complex protein 2 homolog; Short=Protein NOC2 homolog	Q9ZPV5	649	0
Unigene10937_Taxus	243	3	1.0673	--	--	--	--	--	--	--
Unigene10938_Taxus	253	6	2.0501	gi|54695178|dbj|BAD67154.1|	50.4	4e-12	PpPPR_91 [Physcomitrella patens]	P0C898	49.3	2e-12
Unigene10939_Taxus	690	52	6.5149	gi|115450613|ref|NP_001048907.1|	61.6	1e-08	Os03g0138100 [Oryza sativa (japonica cultivar-group)] >gi|113547378|dbj|BAF10821.1| Os03g0138100 [Oryza sativa Japonica Group]	--	--	--
Unigene1093_Taxus	214	2	0.8079	--	--	--	--	--	--	--
Unigene10940_Taxus	247	4	1.4	--	--	--	--	--	--	--
Unigene10941_Taxus	698	255	31.5819	gi|18390837|ref|NP_563803.1|	95.1	1e-18	NF-YC10 (NUCLEAR FACTOR Y, SUBUNIT C10); transcription factor [Arabidopsis thaliana] >gi|8778845|gb|AAF79844.1|AC026875_24 T6D22.7 [Arabidopsis thaliana] >gi|94442463|gb|ABF19019.1| At1g07980 [Arabidopsis thaliana]	Q6BX14	52.4	3e-06
Unigene10942_Taxus	212	11	4.4855	--	--	--	--	--	--	--
Unigene10943_Taxus	423	47	9.6053	gi|225451693|ref|XP_002276597.1|	76.6	5e-23	PREDICTED: similar to importin-related [Vitis vinifera]	--	--	--
Unigene10944_Taxus	1106	176	13.7566	gi|222355764|gb|ACM48567.1|	190	6e-47	JAMYC [Taxus cuspidata]	Q39204	89.4	4e-17
Unigene10945_Taxus	620	74	10.318	--	--	--	--	--	--	--
Unigene10946_Taxus	551	10	1.5689	--	--	--	--	--	--	--
Unigene10947_Taxus	3540	724	17.6803	gi|87240431|gb|ABD32289.1|	600	0	tRNA-binding arm; t-snare [Medicago truncatula]	Q0WVL7	585	0
Unigene10948_Taxus	590	447	65.4951	gi|62733403|gb|AAX95520.1|	101	1e-20	Putative Glycosyl hydrolase family 1 protein [Oryza sativa Japonica Group]	Q9LV33	100	6e-21
Unigene10949_Taxus	358	26	6.2783	gi|225451693|ref|XP_002276597.1|	64.3	7e-10	PREDICTED: similar to importin-related [Vitis vinifera]	--	--	--
Unigene1094_Taxus	315	53	14.5452	--	--	--	--	--	--	--
Unigene10950_Taxus	1909	320	14.491	gi|15241168|ref|NP_197478.1|	795	0	TUA3; structural constituent of cytoskeleton [Arabidopsis thaliana] >gi|15241179|ref|NP_197479.1| TUA5; structural constituent of cytoskeleton [Arabidopsis thaliana] >gi|135406|sp|P20363.1|TBA3_ARATH RecName: Full=Tubulin alpha-3/alpha-5 chain >gi|13605805|gb|AAK32888.1|AF367301_1 AT5g19770/T29J13_190 [Arabidopsis thaliana] >gi|166912|gb|AAA32888.1| alpha-tubulin [Arabidopsis thaliana] >gi|166918…	P20363	795	0
Unigene10951_Taxus	201	13	5.5911	--	--	--	--	--	--	--
Unigene10952_Taxus	266	4	1.3	--	--	--	--	--	--	--
Unigene10953_Taxus	288	15	4.5025	gi|134142842|gb|ABO61742.1|	130	6e-30	trehalose-phosphate synthase 1 [Solanum lycopersicum]	Q9SYM4	126	5e-29
Unigene10954_Taxus	261	5	1.6561	gi|224072274|ref|XP_002303684.1|	85.5	2e-21	oligopeptide transporter OPT family [Populus trichocarpa] >gi|222841116|gb|EEE78663.1| oligopeptide transporter OPT family [Populus trichocarpa]	O82485	89.4	1e-20
Unigene10955_Taxus	408	14	2.9663	gi|124360275|gb|ABN08288.1|	120	1e-26	Ribosomal protein S7 [Medicago truncatula]	P0CB26	111	1e-24
Unigene10956_Taxus	1358	726	46.2158	gi|195606190|gb|ACG24925.1|	572	1e-162	26S proteasome non-ATPase regulatory subunit 14 [Zea mays] >gi|195624272|gb|ACG33966.1| 26S proteasome non-ATPase regulatory subunit 14 [Zea mays]	Q9LT08	563	1e-159
Unigene10957_Taxus	396	23	5.021	gi|29029030|gb|AAO64894.1|	76.3	3e-18	At5g08720 [Arabidopsis thaliana]	--	--	--
Unigene10958_Taxus	615	49	6.8877	gi|15241481|ref|NP_196415.1|	62.8	5e-09	dentin sialophosphoprotein-related [Arabidopsis thaliana]	--	--	--
Unigene10959_Taxus	1334	271	17.5617	gi|15225054|ref|NP_181455.1|	220	7e-66	PLP6 (PATATIN-LIKE PROTEIN 6); nutrient reservoir [Arabidopsis thaliana] >gi|3402683|gb|AAC28986.1| similar to latex allergen from Hevea brasiliensis [Arabidopsis thaliana] >gi|31711904|gb|AAP68308.1| At2g39220 [Arabidopsis thaliana]	Q2MY37	71.6	1e-11
Unigene1095_Taxus	1966	168	7.3872	gi|115469392|ref|NP_001058295.1|	257	2e-96	Os06g0663900 [Oryza sativa (japonica cultivar-group)] >gi|113596335|dbj|BAF20209.1| Os06g0663900 [Oryza sativa Japonica Group]	Q3EDL4	143	6e-44
Unigene10960_Taxus	748	182	21.0341	gi|8954061|gb|AAF82234.1|AC069143_10	52.4	1e-05	T29M8.11 [Arabidopsis thaliana]	--	--	--
Unigene10961_Taxus	1525	676	38.3204	gi|18420075|ref|NP_568386.1|	358	1e-97	integral membrane family protein [Arabidopsis thaliana]	Q96HH6	188	8e-47
Unigene10962_Taxus	863	34	3.4058	gi|15230152|ref|NP_188493.1|	140	3e-32	uracil DNA glycosylase family protein [Arabidopsis thaliana] >gi|9294324|dbj|BAB02221.1| uracil-DNA glycosylase-like protein [Arabidopsis thaliana] >gi|115646763|gb|ABJ17110.1| At3g18630 [Arabidopsis thaliana]	C1DQR0	96.3	2e-19
Unigene10963_Taxus	1706	151	7.6516	gi|22326858|ref|NP_197195.2|	572	1e-162	AAA-type ATPase family protein [Arabidopsis thaliana]	Q58E76	253	2e-66
Unigene10964_Taxus	490	26	4.587	gi|115454313|ref|NP_001050757.1|	60.1	1e-24	Os03g0644200 [Oryza sativa (japonica cultivar-group)] >gi|53749418|gb|AAU90276.1| PPR repeat containing protein [Oryza sativa Japonica Group] >gi|255674740|dbj|BAH92290.1| Os03g0644100 [Oryza sativa Japonica Group]	Q9M9E2	59.7	1e-22
Unigene10965_Taxus	888	79	7.6907	gi|18413285|ref|NP_567349.1|	304	1e-91	electron carrier/ protein disulfide oxidoreductase [Arabidopsis thaliana] >gi|30681283|ref|NP_849353.1| electron carrier/ protein disulfide oxidoreductase [Arabidopsis thaliana]	--	--	--
Unigene10966_Taxus	234	10	3.6943	gi|115439193|ref|NP_001043876.1|	103	8e-22	Os01g0680900 [Oryza sativa (japonica cultivar-group)] >gi|56202296|dbj|BAD73755.1| membrane protein-like [Oryza sativa Japonica Group] >gi|113533407|dbj|BAF05790.1| Os01g0680900 [Oryza sativa Japonica Group]	--	--	--
Unigene10967_Taxus	461	11	2.0627	gi|15235472|ref|NP_195434.1|	56.6	2e-14	pentatricopeptide (PPR) repeat-containing protein [Arabidopsis thaliana] >gi|75097747|sp|O23169.1|PP353_ARATH RecName: Full=Pentatricopeptide repeat-containing protein At4g37170	O23169	56.6	8e-15
Unigene10968_Taxus	247	5	1.75	gi|255566438|ref|XP_002524204.1|	60.8	8e-09	DNA binding protein, putative [Ricinus communis] >gi|223536481|gb|EEF38128.1| DNA binding protein, putative [Ricinus communis]	--	--	--
Unigene10969_Taxus	488	53	9.3888	gi|1655699|emb|CAA69032.1|	57	2e-07	pherophorin-S [Volvox carteri f. nagariensis]	Q9UMN6	54.7	3e-07
Unigene1096_Taxus	225	22	8.4527	--	--	--	--	--	--	--
Unigene10970_Taxus	636	55	7.4758	gi|30685491|ref|NP_565757.2|	100	2e-24	ATZW10 [Arabidopsis thaliana] >gi|12643613|sp|O48626.1|ZW10_ARATH RecName: Full=Centromere/kinetochore protein zw10 homolog >gi|2661179|gb|AAB88246.1| AtZW10 [Arabidopsis thaliana] >gi|17978942|gb|AAL47437.1| At2g32900/T21L14.16 [Arabidopsis thaliana]	O48626	100	5e-25
Unigene10971_Taxus	319	12	3.252	gi|115469330|ref|NP_001058264.1|	63.2	2e-09	Os06g0659400 [Oryza sativa (japonica cultivar-group)] >gi|51536173|dbj|BAD38346.1| lustrin A-like [Oryza sativa Japonica Group] >gi|52077362|dbj|BAD46402.1| lustrin A-like [Oryza sativa Japonica Group] >gi|113596304|dbj|BAF20178.1| Os06g0659400 [Oryza sativa Japonica Group]	--	--	--
Unigene10972_Taxus	462	102	19.0859	gi|75337688|sp|Q9SUQ3.1|Y4374_ARATH	65.1	8e-13	RecName: Full=Probable inactive receptor kinase At4g23740; Flags: Precursor >gi|224589628|gb|ACN59347.1| leucine-rich repeat receptor-like protein kinase [Arabidopsis thaliana]	Q9SUQ3	65.1	3e-13
Unigene10973_Taxus	554	28	4.3692	gi|115474287|ref|NP_001060742.1|	246	2e-64	Os07g0694800 [Oryza sativa (japonica cultivar-group)] >gi|113612278|dbj|BAF22656.1| Os07g0694800 [Oryza sativa Japonica Group]	--	--	--
Unigene10974_Taxus	471	44	8.0758	gi|115465749|ref|NP_001056474.1|	89	3e-17	Os05g0588300 [Oryza sativa (japonica cultivar-group)]	O48788	79.3	9e-15
Unigene10975_Taxus	340	46	11.6959	--	--	--	--	--	--	--
Unigene10976_Taxus	395	18	3.9394	--	--	--	--	--	--	--
Unigene10977_Taxus	741	170	19.8328	gi|62867641|gb|AAY17424.1|	135	1e-30	At2g01340 [Arabidopsis thaliana] >gi|94442481|gb|ABF19028.1| At2g01340 [Arabidopsis thaliana]	Q6NLC8	125	3e-28
Unigene10978_Taxus	525	41	6.7512	gi|255070031|ref|XP_002507097.1|	67.4	3e-21	transcription initiation factor TFIIIB, Bdp1 subunit [Micromonas sp. RCC299] >gi|226522372|gb|ACO68355.1| transcription initiation factor TFIIIB, Bdp1 subunit [Micromonas sp. RCC299]	O94481	69.3	8e-15
Unigene10979_Taxus	2066	744	31.1312	gi|115481514|ref|NP_001064350.1|	89	4e-16	Os10g0324600 [Oryza sativa (japonica cultivar-group)] >gi|110288876|gb|AAP52964.2| expressed protein [Oryza sativa (japonica cultivar-group)] >gi|113638959|dbj|BAF26264.1| Os10g0324600 [Oryza sativa Japonica Group]	--	--	--
Unigene1097_Taxus	332	45	11.7173	--	--	--	--	--	--	--
Unigene10980_Taxus	482	55	9.8644	gi|116780331|gb|ABK21635.1|	58.5	5e-08	unknown [Picea sitchensis]	--	--	--
Unigene10981_Taxus	269	7	2.2496	gi|40850576|gb|AAR96007.1|	54.3	5e-15	transposase-like protein [Musa acuminata]	--	--	--
Unigene10982_Taxus	296	24	7.0093	--	--	--	--	--	--	--
Unigene10983_Taxus	252	15	5.1457	--	--	--	--	--	--	--
Unigene10984_Taxus	393	38	8.3588	gi|227202608|dbj|BAH56777.1|	97.1	1e-19	AT1G01770 [Arabidopsis thaliana]	--	--	--
Unigene10985_Taxus	860	76	7.6396	gi|255671052|dbj|BAF09226.2|	60.5	5e-08	Os02g0595300 [Oryza sativa Japonica Group]	--	--	--
Unigene10986_Taxus	244	16	5.6687	--	--	--	--	--	--	--
Unigene10987_Taxus	252	71	24.3563	--	--	--	--	--	--	--
Unigene10988_Taxus	312	19	5.2644	--	--	--	--	--	--	--
Unigene10989_Taxus	1278	399	26.9895	gi|15242811|ref|NP_195981.1|	185	2e-45	GDSL-motif lipase/hydrolase family protein [Arabidopsis thaliana] >gi|75181338|sp|Q9LZS7.1|GDL71_ARATH RecName: Full=GDSL esterase/lipase At5g03610; AltName: Full=Extracellular lipase At5g03610; Flags: Precursor	Q9LZS7	185	5e-46
Unigene1098_Taxus	1455	500	29.7071	gi|18391117|ref|NP_563862.1|	250	7e-65	carbohydrate binding [Arabidopsis thaliana] >gi|75213370|sp|Q9SY57.1|P2A10_ARATH RecName: Full=Protein PHLOEM PROTEIN 2-LIKE A10; Short=AtPP2-A10 >gi|4914317|gb|AAD32865.1|AC005489_3 F14N23.3 [Arabidopsis thaliana] >gi|94807671|gb|ABF47131.1| At1g10150 [Arabidopsis thaliana]	Q9SY57	250	2e-65
Unigene10990_Taxus	541	23	3.6752	gi|116310281|emb|CAH67300.1|	242	6e-80	OSIGBa0102D10.3 [Oryza sativa (indica cultivar-group)]	Q6S001	107	6e-29
Unigene10991_Taxus	320	40	10.806	--	--	--	--	--	--	--
Unigene10992_Taxus	516	26	4.3559	gi|22331748|ref|NP_190794.2|	151	5e-36	pseudouridine synthase family protein [Arabidopsis thaliana] >gi|56744228|gb|AAW28554.1| At3g52260 [Arabidopsis thaliana]	Q5M721	151	2e-36
Unigene10993_Taxus	381	24	5.4455	gi|21592813|gb|AAM64762.1|	129	2e-29	ids4-like protein [Arabidopsis thaliana]	Q55B06	52	1e-06
Unigene10994_Taxus	872	138	13.6809	gi|50593095|gb|AAT79354.1|	251	1e-105	taxane 2-alpha-O-benzoyltransferase [Taxus x media] >gi|57868102|gb|AAW57406.1| taxane 2-alpha-O-benzoyltransferase [Taxus x media]	Q9FPW3	248	1e-105
Unigene10995_Taxus	275	7	2.2005	gi|38345601|emb|CAD41884.2|	50.8	1e-13	OSJNBa0093O08.3 [Oryza sativa (japonica cultivar-group)]	Q9LYN8	35.4	4e-06
Unigene10996_Taxus	466	46	8.5335	gi|224103053|ref|XP_002312905.1|	119	5e-36	cytochrome P450 [Populus trichocarpa] >gi|222849313|gb|EEE86860.1| cytochrome P450 [Populus trichocarpa]	P98188	100	4e-33
Unigene10997_Taxus	250	17	5.8784	gi|168048153|ref|XP_001776532.1|	51.6	5e-06	predicted protein [Physcomitrella patens subsp. patens] >gi|162672123|gb|EDQ58665.1| predicted protein [Physcomitrella patens subsp. patens]	--	--	--
Unigene10998_Taxus	480	61	10.9861	gi|168000344|ref|XP_001752876.1|	160	1e-38	SSADH [Physcomitrella patens subsp. patens] >gi|162696039|gb|EDQ82380.1| SSADH [Physcomitrella patens subsp. patens]	Q9SAK4	159	7e-39
Unigene10999_Taxus	2166	1129	45.0598	gi|183979104|emb|CAP08301.1|	342	3e-92	DNA-binding protein [Vitis thunbergii]	Q9XI90	301	1e-80
Unigene1099_Taxus	713	58	7.0322	gi|15218309|ref|NP_177348.1|	93.2	4e-34	GCN5-related N-acetyltransferase (GNAT) family protein [Arabidopsis thaliana]	--	--	--
Unigene109_Taxus	356	96	23.3117	--	--	--	--	--	--	--
Unigene10_Taxus	1640	709	37.3728	gi|186523158|ref|NP_197072.3|	761	0	binding [Arabidopsis thaliana]	P40468	99	9e-20
Unigene11000_Taxus	638	50	6.7749	gi|270247794|emb|CBI33150.1|	83.6	3e-15	unnamed protein product [Vitis vinifera]	--	--	--
Unigene11001_Taxus	564	3608	553.02	gi|13359451|dbj|BAB33421.1|	74.7	1e-25	putative senescence-associated protein [Pisum sativum]	--	--	--
Unigene11002_Taxus	916	107	10.0981	gi|42565094|ref|NP_188819.2|	216	1e-60	ATXR2 (HISTONE-LYSINE N-METHYLTRANSFERASE ATXR2); zinc ion binding [Arabidopsis thaliana] >gi|75251251|sp|Q5PP37.1|ATXR2_ARATH RecName: Full=Histone-lysine N-methyltransferase ATXR2; AltName: Full=Trithorax-related protein 2; Short=TRX-related protein 2; AltName: Full=Protein SET DOMAIN GROUP 36 >gi|56236050|gb|AAV84481.1| At3g21820 [Arabidopsis thaliana] >gi|59958344|gb|AAX12882.1| At3g21820 [Ar…	Q5PP37	216	5e-61
Unigene11003_Taxus	477	25	4.5308	gi|18412304|ref|NP_565202.1|	98.2	6e-20	mitochondrial transcription termination factor family protein / mTERF family protein [Arabidopsis thaliana] >gi|3152561|gb|AAC17042.1| Contains similarity to myb protein homolog gb|Z13997 from Petunia hybrida [Arabidopsis thaliana]	--	--	--
Unigene11004_Taxus	2964	1090	31.7908	gi|92019691|dbj|BAE93236.1|	974	0	potassium transporter [Phragmites australis]	Q942X8	952	0
Unigene11005_Taxus	256	14	4.7276	gi|21542216|sp|P93479.1|RETO_PAPSO	123	1e-27	RecName: Full=Reticuline oxidase; AltName: Full=Berberine bridge-forming enzyme; Short=BBE; AltName: Full=Tetrahydroprotoberberine synthase; Flags: Precursor >gi|3282517|gb|AAC61839.1| berberine bridge enzyme [Papaver somniferum]	P93479	123	3e-28
Unigene11006_Taxus	702	413	50.8588	gi|15222235|ref|NP_177679.1|	110	3e-23	ATP-dependent protease La (LON) domain-containing protein [Arabidopsis thaliana] >gi|10120444|gb|AAG13069.1|AC023754_7 Unknown protein [Arabidopsis thaliana]	--	--	--
Unigene11007_Taxus	225	26	9.9895	--	--	--	--	--	--	--
Unigene11008_Taxus	3347	1499	38.7168	gi|255677141|dbj|BAH93574.1|	469	0	Os06g0558700 [Oryza sativa Japonica Group]	Q54J73	340	1e-114
Unigene11009_Taxus	797	98	10.6297	gi|115443779|ref|NP_001045669.1|	53.9	4e-06	Os02g0114600 [Oryza sativa (japonica cultivar-group)] >gi|113535200|dbj|BAF07583.1| Os02g0114600 [Oryza sativa Japonica Group]	--	--	--
Unigene1100_Taxus	800	74	7.9964	--	--	--	--	--	--	--
Unigene11010_Taxus	1045	513	42.438	gi|15235567|ref|NP_195463.1|	53.1	1e-05	hydrolase, alpha/beta fold family protein [Arabidopsis thaliana]	--	--	--
Unigene11011_Taxus	3025	541	15.4606	gi|42567183|ref|NP_194478.3|	299	1e-126	glycosyltransferase family 14 protein / core-2/I-branching enzyme family protein [Arabidopsis thaliana] >gi|186514118|ref|NP_001119069.1| glycosyltransferase family 14 protein / core-2/I-branching enzyme family protein [Arabidopsis thaliana]	Q9EPI1	41.6	1e-06
Unigene11012_Taxus	263	13	4.2731	--	--	--	--	--	--	--
Unigene11013_Taxus	3182	645	17.5232	gi|115488966|ref|NP_001066970.1|	554	1e-174	Os12g0548200 [Oryza sativa (japonica cultivar-group)] >gi|77556081|gb|ABA98877.1| expressed protein [Oryza sativa (japonica cultivar-group)] >gi|113649477|dbj|BAF29989.1| Os12g0548200 [Oryza sativa Japonica Group]	Q10475	131	3e-29
Unigene11014_Taxus	289	22	6.5808	--	--	--	--	--	--	--
Unigene11015_Taxus	2618	841	27.7703	gi|115484445|ref|NP_001065884.1|	1007	0	Os11g0176200 [Oryza sativa (japonica cultivar-group)] >gi|62733691|gb|AAX95802.1| HUA enhancer 2 [Oryza sativa Japonica Group] >gi|77548918|gb|ABA91715.1| DEAD/DEAH box helicase family protein, expressed [Oryza sativa (japonica cultivar-group)] >gi|113644588|dbj|BAF27729.1| Os11g0176200 [Oryza sativa Japonica Group]	P42285	656	0
Unigene11016_Taxus	1595	263	14.2544	gi|195615504|gb|ACG29582.1|	77.8	7e-13	kelch motif family protein [Zea mays]	Q9CA63	71.2	2e-11
Unigene11017_Taxus	271	35	11.1648	gi|18421632|ref|NP_568547.1|	62.8	2e-09	WSD1; diacylglycerol O-acyltransferase/ long-chain-alcohol O-fatty-acyltransferase [Arabidopsis thaliana] >gi|75163815|sp|Q93ZR6.1|WSD1_ARATH RecName: Full=O-acyltransferase WSD1; AltName: Full=Long-chain-alcohol O-fatty-acyltransferase; AltName: Full=Wax synthase; Short=WS; AltName: Full=Diacylglycerol O-acyltransferase; Short=DGAT >gi|53749162|gb|AAU90066.1| At5g37300 [Arabidopsis thaliana]	Q93ZR6	62.8	6e-10
Unigene11018_Taxus	215	24	9.65	--	--	--	--	--	--	--
Unigene11019_Taxus	838	107	11.0381	gi|115452033|ref|NP_001049617.1|	60.1	6e-08	Os03g0260000 [Oryza sativa (japonica cultivar-group)] >gi|113548088|dbj|BAF11531.1| Os03g0260000 [Oryza sativa Japonica Group]	Q02817	63.2	2e-09
Unigene1101_Taxus	404	21	4.4936	--	--	--	--	--	--	--
Unigene11020_Taxus	505	172	29.4436	gi|75293214|sp|Q6WG30.2|T5H_TAXCU	218	4e-56	RecName: Full=Taxadiene 5-alpha hydroxylase >gi|64180315|gb|AAQ56240.2| taxadiene 5-alpha hydroxylase [Taxus cuspidata]	Q6WG30	218	1e-56
Unigene11021_Taxus	575	76	11.4261	gi|115436148|ref|NP_001042832.1|	94.4	1e-18	Os01g0303200 [Oryza sativa (japonica cultivar-group)] >gi|52077473|dbj|BAD45037.1| transmembrane domain, a coiled coil-4 domain, of eukaryotic origin (91.3 kD) -like protein [Oryza sativa Japonica Group] >gi|113532363|dbj|BAF04746.1| Os01g0303200 [Oryza sativa Japonica Group]	--	--	--
Unigene11022_Taxus	1871	741	34.2372	gi|124360605|gb|ABN08604.1|	431	1e-119	Tyrosinase [Medicago truncatula]	P43311	429	1e-119
Unigene11023_Taxus	353	17	4.1632	--	--	--	--	--	--	--
Unigene11024_Taxus	541	85	13.5824	gi|224083496|ref|XP_002307051.1|	89.4	4e-17	PAD4 [Populus trichocarpa] >gi|222856500|gb|EEE94047.1| PAD4 [Populus trichocarpa]	--	--	--
Unigene11025_Taxus	1263	146	9.9932	gi|66792648|gb|AAY56426.1|	81.3	4e-29	At2g03070 [Arabidopsis thaliana]	--	--	--
Unigene11026_Taxus	219	10	3.9474	--	--	--	--	--	--	--
Unigene11027_Taxus	247	17	5.9498	--	--	--	--	--	--	--
Unigene11028_Taxus	266	43	13.9746	gi|15219379|ref|NP_178062.1|	145	3e-34	ALDH5F1; 3-chloroallyl aldehyde dehydrogenase/ NAD or NADH binding / succinate-semialdehyde dehydrogenase [Arabidopsis thaliana] >gi|118575126|sp|Q9SAK4.2|SSDH_ARATH RecName: Full=Succinate-semialdehyde dehydrogenase, mitochondrial; Short=At-SSADH1; AltName: Full=NAD(+)-dependent succinic semialdehyde dehydrogenase; AltName: Full=Aldehyde dehydrogenase family 5 member F1; Flags: Precursor >gi|668…	Q9SAK4	145	1e-34
Unigene11029_Taxus	3186	463	12.5629	gi|5080810|gb|AAD39319.1|AC007258_8	937	0	Very similar to helicases [Arabidopsis thaliana]	Q9CZU3	745	0
Unigene1102_Taxus	792	208	22.7034	gi|115467078|ref|NP_001057138.1|	150	2e-35	Os06g0215400 [Oryza sativa (japonica cultivar-group)] >gi|113595178|dbj|BAF19052.1| Os06g0215400 [Oryza sativa Japonica Group]	--	--	--
Unigene11030_Taxus	1497	232	13.3974	gi|240254401|ref|NP_178040.5|	117	2e-65	binding [Arabidopsis thaliana]	--	--	--
Unigene11031_Taxus	392	29	6.3954	gi|115450511|ref|NP_001048856.1|	102	2e-21	Os03g0130700 [Oryza sativa (japonica cultivar-group)] >gi|113547327|dbj|BAF10770.1| Os03g0130700 [Oryza sativa Japonica Group]	Q9CQA9	50.4	3e-06
Unigene11032_Taxus	761	365	41.4631	--	--	--	--	--	--	--
Unigene11033_Taxus	218	10	3.9655	--	--	--	--	--	--	--
Unigene11034_Taxus	1558	262	14.5374	gi|63003794|gb|AAY25426.1|	345	4e-95	At3g56430 [Arabidopsis thaliana] >gi|114213521|gb|ABI54343.1| At3g56430 [Arabidopsis thaliana]	--	--	--
Unigene11035_Taxus	234	13	4.8027	--	--	--	--	--	--	--
Unigene11036_Taxus	267	7	2.2664	--	--	--	--	--	--	--
Unigene11037_Taxus	251	10	3.4441	gi|22329705|ref|NP_683319.1|	48.9	8e-06	VQ motif-containing protein [Arabidopsis thaliana] >gi|8920630|gb|AAF81352.1|AC036104_1 Contains weak similarity to alpha-/beta-gliadin class A-II from Triticum aestivum gb|M10092 [Arabidopsis thaliana]	Q8LGD5	39.7	2e-06
Unigene11038_Taxus	211	11	4.5068	--	--	--	--	--	--	--
Unigene11039_Taxus	1016	70	5.956	gi|38112427|gb|AAR11299.1|	182	4e-68	lectin-like receptor kinase 7;2 [Medicago truncatula]	Q66GN2	134	2e-52
Unigene1103_Taxus	441	34	6.6649	--	--	--	--	--	--	--
Unigene11040_Taxus	705	86	10.5454	gi|30686073|ref|NP_194046.2|	147	2e-34	protein kinase family protein [Arabidopsis thaliana] >gi|75329759|sp|Q8L7G3.1|CRK7_ARATH RecName: Full=Cysteine-rich receptor-like protein kinase 7; Short=Cysteine-rich RLK7; Flags: Precursor	Q8L7G3	147	6e-35
Unigene11041_Taxus	277	11	3.4329	gi|124361004|gb|ABN08976.1|	95.9	2e-19	Leucine-rich repeat; Leucine-rich repeat, cysteine-containing type [Medicago truncatula]	Q94AG2	76.6	4e-14
Unigene11042_Taxus	479	89	16.0623	gi|108708321|gb|ABF96116.1|	63.5	2e-09	expressed protein [Oryza sativa (japonica cultivar-group)]	--	--	--
Unigene11043_Taxus	219	14	5.5263	--	--	--	--	--	--	--
Unigene11044_Taxus	1826	550	26.0385	gi|15229319|ref|NP_187110.1|	596	1e-177	tRNA synthetase class I (W and Y) family protein [Arabidopsis thaliana] >gi|145331754|ref|NP_001078104.1| tRNA synthetase class I (W and Y) family protein [Arabidopsis thaliana]	Q6P7B0	474	1e-133
Unigene11045_Taxus	1165	220	16.3249	gi|196122243|gb|ACG69783.1|	197	5e-49	thioesterase-like protein [Solanum lycopersicum]	--	--	--
Unigene11046_Taxus	2035	272	11.5547	gi|255670445|dbj|BAF30196.2|	511	1e-143	Os12g0594200 [Oryza sativa Japonica Group]	P87319	67.8	3e-10
Unigene11047_Taxus	247	12	4.1999	gi|15234719|ref|NP_193940.1|	52	1e-10	pectate lyase family protein [Arabidopsis thaliana] >gi|32129857|sp|O65457.1|PEL17_ARATH RecName: Full=Putative pectate lyase 17; Flags: Precursor >gi|2961354|emb|CAA18112.1| pectate lyase like protein [Arabidopsis thaliana] >gi|7269054|emb|CAB79164.1| pectate lyase like protein [Arabidopsis thaliana]	O65457	52	4e-11
Unigene11048_Taxus	464	15	2.7946	gi|115436694|ref|NP_001043105.1|	94.4	4e-40	Os01g0388500 [Oryza sativa (japonica cultivar-group)]	--	--	--
Unigene11049_Taxus	1705	763	38.686	gi|115459702|ref|NP_001053451.1|	460	1e-128	Os04g0542900 [Oryza sativa (japonica cultivar-group)] >gi|113565022|dbj|BAF15365.1| Os04g0542900 [Oryza sativa Japonica Group]	B1H3D5	195	9e-49
Unigene1104_Taxus	1002	336	28.9885	gi|115479423|ref|NP_001063305.1|	237	3e-61	Os09g0445700 [Oryza sativa (japonica cultivar-group)] >gi|113631538|dbj|BAF25219.1| Os09g0445700 [Oryza sativa Japonica Group]	Q54DY9	72.8	4e-12
Unigene11050_Taxus	283	22	6.7203	--	--	--	--	--	--	--
Unigene11051_Taxus	293	4	1.1802	gi|15232648|ref|NP_190263.1|	71.6	4e-12	CRR2 (CHLORORESPIRATORY REDUCTION 2) [Arabidopsis thaliana] >gi|75207666|sp|Q9STF3.1|PP265_ARATH RecName: Full=Pentatricopeptide repeat-containing protein At3g46790, chloroplastic; AltName: Full=Protein CHLORORESPIRATORY REDUCTION 2; Flags: Precursor	Q9STF3	71.6	1e-12
Unigene11052_Taxus	683	86	10.8851	gi|14335134|gb|AAK59847.1|	112	3e-33	At1g69680/T6C23_12 [Arabidopsis thaliana] >gi|18655341|gb|AAL76126.1| At1g69680/T6C23_12 [Arabidopsis thaliana]	--	--	--
Unigene11053_Taxus	242	11	3.9294	--	--	--	--	--	--	--
Unigene11054_Taxus	1306	691	45.7392	gi|15242393|ref|NP_197083.1|	188	3e-46	zinc finger (C3HC4-type RING finger) family protein [Arabidopsis thaliana] >gi|42573377|ref|NP_974785.1| zinc finger (C3HC4-type RING finger) family protein [Arabidopsis thaliana] >gi|30023690|gb|AAP13378.1| At5g15790 [Arabidopsis thaliana]	Q8LE94	184	2e-45
Unigene11055_Taxus	255	6	2.0341	gi|30678047|ref|NP_565298.2|	60.8	8e-09	aspartyl protease family protein [Arabidopsis thaliana] >gi|30102688|gb|AAP21262.1| At2g03200 [Arabidopsis thaliana]	Q766C2	52.4	9e-07
Unigene11056_Taxus	961	133	11.9641	gi|145358849|ref|NP_199258.3|	264	2e-69	methyltransferase [Arabidopsis thaliana]	O13748	150	9e-36
Unigene11057_Taxus	492	17	2.987	gi|15215852|gb|AAK91470.1|	125	2e-45	AT5g14850/T9L3_150 [Arabidopsis thaliana] >gi|21464563|gb|AAM52236.1| AT5g14850/T9L3_150 [Arabidopsis thaliana]	Q9JJQ0	81.6	2e-29
Unigene11058_Taxus	334	33	8.5412	--	--	--	--	--	--	--
Unigene11059_Taxus	2686	445	14.3221	gi|146762448|gb|ABQ45352.1|	748	0	RNA-dependent RNA polymerase [Gossypium hirsutum]	Q0DXS3	707	0
Unigene1105_Taxus	559	40	6.1859	--	--	--	--	--	--	--
Unigene11060_Taxus	1568	314	17.3116	gi|18400779|ref|NP_566515.1|	171	4e-41	WD-40 repeat family protein [Arabidopsis thaliana] >gi|13937211|gb|AAK50098.1|AF372960_1 AT3g15470/MJK13_13 [Arabidopsis thaliana] >gi|15795112|dbj|BAB02376.1| WD-40 repeat protein-like [Arabidopsis thaliana] >gi|19548013|gb|AAL87370.1| AT3g15470/MJK13_13 [Arabidopsis thaliana]	Q9XSC3	74.7	2e-12
Unigene11061_Taxus	618	68	9.512	gi|225447555|ref|XP_002269014.1|	37	2e-06	PREDICTED: hypothetical protein [Vitis vinifera] >gi|270241210|emb|CBI28436.1| unnamed protein product [Vitis vinifera]	--	--	--
Unigene11062_Taxus	866	109	10.8808	--	--	--	--	--	--	--
Unigene11063_Taxus	251	18	6.1994	--	--	--	--	--	--	--
Unigene11064_Taxus	528	55	9.005	gi|115437494|ref|NP_001043309.1|	66.2	3e-10	Os01g0551900 [Oryza sativa (japonica cultivar-group)]	--	--	--
Unigene11065_Taxus	1172	736	54.288	gi|60543361|gb|AAX22278.1|	113	7e-24	At5g20130 [Arabidopsis thaliana]	--	--	--
Unigene11066_Taxus	602	104	14.9345	gi|30023714|gb|AAP13390.1|	129	5e-29	At5g44170 [Arabidopsis thaliana]	Q9H867	59.7	1e-08
Unigene11067_Taxus	206	9	3.7768	--	--	--	--	--	--	--
Unigene11068_Taxus	231	44	16.4662	--	--	--	--	--	--	--
Unigene11069_Taxus	352	5	1.228	--	--	--	--	--	--	--
Unigene1106_Taxus	480	28	5.0428	gi|115463363|ref|NP_001055281.1|	76.3	5e-24	Os05g0353300 [Oryza sativa (japonica cultivar-group)] >gi|113578832|dbj|BAF17195.1| Os05g0353300 [Oryza sativa Japonica Group]	Q0WNN7	72.4	3e-26
Unigene11070_Taxus	431	271	54.3558	gi|75319884|sp|Q50EK1.1|C16B1_PICSI	179	2e-44	RecName: Full=Cytochrome P450 716B1; AltName: Full=Cytochrome P450 CYPA1 >gi|59800274|gb|AAX07436.1| cytochrome P450 CYPA1 [Picea sitchensis]	Q50EK1	179	6e-45
Unigene11071_Taxus	731	55	6.5043	gi|225459056|ref|XP_002285638.1|	133	2e-58	PREDICTED: similar to SAB [Vitis vinifera]	--	--	--
Unigene11072_Taxus	559	450	69.5912	gi|227206308|dbj|BAH57209.1|	94.4	1e-18	AT5G48930 [Arabidopsis thaliana]	O24645	82	2e-15
Unigene11073_Taxus	382	46	10.4099	--	--	--	--	--	--	--
Unigene11074_Taxus	1049	133	10.9605	--	--	--	--	--	--	--
Unigene11075_Taxus	442	26	5.0852	gi|168068180|ref|XP_001785966.1|	158	3e-38	histone H3 [Physcomitrella patens subsp. patens] >gi|162662346|gb|EDQ49221.1| histone H3 [Physcomitrella patens subsp. patens]	P08437	145	1e-34
Unigene11076_Taxus	2167	422	16.8348	gi|115440165|ref|NP_001044362.1|	830	0	Os01g0767700 [Oryza sativa (japonica cultivar-group)] >gi|113533893|dbj|BAF06276.1| Os01g0767700 [Oryza sativa Japonica Group]	Q9H6S0	481	1e-134
Unigene11077_Taxus	532	40	6.4998	gi|168039223|ref|XP_001772098.1|	61.6	8e-09	predicted protein [Physcomitrella patens subsp. patens] >gi|162676699|gb|EDQ63179.1| predicted protein [Physcomitrella patens subsp. patens]	--	--	--
Unigene11078_Taxus	332	39	10.155	gi|199601701|dbj|BAG70995.1|	72.8	2e-12	uncharacterized protein [Musa balbisiana] >gi|199601726|dbj|BAG70985.1| uncharacterized protein [Musa balbisiana]	--	--	--
Unigene11079_Taxus	334	112	28.9885	--	--	--	--	--	--	--
Unigene1107_Taxus	342	15	3.7916	gi|242345159|dbj|BAH80312.1|	85.5	5e-19	UDP-glucose:flavonoid glucoside 1,6-glucosyltransferase [Catharanthus roseus]	Q40287	80.1	5e-18
Unigene11080_Taxus	258	5	1.6753	gi|225442859|ref|XP_002281455.1|	51.6	5e-06	PREDICTED: hypothetical protein [Vitis vinifera]	--	--	--
Unigene11081_Taxus	661	104	13.6015	gi|115438522|ref|NP_001043560.1|	79.7	4e-14	Os01g0612900 [Oryza sativa (japonica cultivar-group)]	Q9FJ45	66.6	1e-10
Unigene11082_Taxus	2467	502	17.5909	gi|115441391|ref|NP_001044975.1|	243	1e-121	Os01g0877500 [Oryza sativa (japonica cultivar-group)] >gi|113534506|dbj|BAF06889.1| Os01g0877500 [Oryza sativa Japonica Group]	Q9C810	233	1e-108
Unigene11083_Taxus	204	7	2.9663	--	--	--	--	--	--	--
Unigene11084_Taxus	991	115	10.0318	gi|22330529|ref|NP_683486.1|	124	3e-49	leucine-rich repeat family protein [Arabidopsis thaliana]	P0CB16	77.4	1e-13
Unigene11085_Taxus	279	24	7.4364	gi|224097688|ref|XP_002311042.1|	126	1e-28	proline transporter [Populus trichocarpa] >gi|222850862|gb|EEE88409.1| proline transporter [Populus trichocarpa]	--	--	--
Unigene11086_Taxus	1497	591	34.1287	gi|115452295|ref|NP_001049748.1|	210	8e-53	Os03g0282800 [Oryza sativa (japonica cultivar-group)] >gi|108707529|gb|ABF95324.1| expressed protein [Oryza sativa (japonica cultivar-group)] >gi|113548219|dbj|BAF11662.1| Os03g0282800 [Oryza sativa Japonica Group]	--	--	--
Unigene11087_Taxus	245	57	20.1123	--	--	--	--	--	--	--
Unigene11088_Taxus	2206	305	11.9522	gi|116056006|emb|CAL58539.1|	204	9e-51	FLJ10996 variant protein (ISS) [Ostreococcus tauri]	Q640U7	277	2e-73
Unigene11089_Taxus	1310	250	16.4977	gi|61611694|gb|AAX47176.1|	116	1e-24	expressed protein [Pisum sativum]	--	--	--
Unigene1108_Taxus	216	5	2.0011	--	--	--	--	--	--	--
Unigene11090_Taxus	1433	565	34.0844	gi|15241832|ref|NP_201048.1|	345	1e-93	aldo/keto reductase family protein [Arabidopsis thaliana] >gi|10178073|dbj|BAB11492.1| aldose reductase-like protein [Arabidopsis thaliana] >gi|67633910|gb|AAY78879.1| aldo/keto reductase family protein [Arabidopsis thaliana]	P26690	290	2e-77
Unigene11091_Taxus	1730	403	20.1378	gi|16226796|gb|AAL16264.1|AF428334_1	477	1e-137	At2g47960/T9J23.10 [Arabidopsis thaliana] >gi|20197311|gb|AAC63650.2| expressed protein [Arabidopsis thaliana] >gi|20197565|gb|AAM15133.1| expressed protein [Arabidopsis thaliana]	Q55EX6	188	1e-46
Unigene11092_Taxus	1380	741	46.4187	gi|171854591|dbj|BAG16486.1|	448	1e-124	succinic semialdehyde reductase isofom2 [Solanum lycopersicum]	Q5RKH0	261	6e-69
Unigene11093_Taxus	1481	299	17.453	gi|115440107|ref|NP_001044333.1|	77.4	8e-13	Os01g0763200 [Oryza sativa (japonica cultivar-group)] >gi|113533864|dbj|BAF06247.1| Os01g0763200 [Oryza sativa Japonica Group]	Q9S7W5	72	1e-11
Unigene11094_Taxus	1419	563	34.2988	gi|18395411|ref|NP_565288.1|	139	1e-31	PLPB (PAS/LOV PROTEIN B); signal transducer/ two-component sensor [Arabidopsis thaliana] >gi|75099072|sp|O64511.2|TLOV1_ARATH RecName: Full=Protein TWIN LOV 1 >gi|15010682|gb|AAK74000.1| At2g02710/T20F6.15 [Arabidopsis thaliana] >gi|16323302|gb|AAL15406.1| At2g02710/T20F6.15 [Arabidopsis thaliana]	O64511	139	4e-32
Unigene11095_Taxus	252	9	3.0874	--	--	--	--	--	--	--
Unigene11096_Taxus	252	20	6.8609	--	--	--	--	--	--	--
Unigene11097_Taxus	251	16	5.5106	--	--	--	--	--	--	--
Unigene11098_Taxus	418	20	4.1363	gi|42561762|ref|NP_172162.3|	53.1	2e-12	DRIP1 (DREB2A-INTERACTING PROTEIN 1); protein binding / ubiquitin-protein ligase/ zinc ion binding [Arabidopsis thaliana]	--	--	--
Unigene11099_Taxus	490	24	4.2342	gi|226503005|ref|NP_001147118.1|	94.4	4e-22	replication protein A1 [Zea mays] >gi|195607412|gb|ACG25536.1| replication protein A 70 kDa DNA-binding subunit [Zea mays]	--	--	--
Unigene1109_Taxus	401	10	2.1558	gi|18412102|ref|NP_565188.1|	71.6	4e-24	cell division cycle family protein [Arabidopsis thaliana] >gi|190016006|gb|ACE62891.1| At1g78770 [Arabidopsis thaliana]	--	--	--
Unigene110_Taxus	830	528	54.9932	gi|288558799|gb|ACV87307.2|	168	1e-40	glycosyltransferase [Populus deltoides]	Q4R1I9	160	7e-39
Unigene11100_Taxus	658	37	4.861	gi|20513347|dbj|BAB91454.1|	185	2e-62	phosphoribosyltransferase [Cryptomeria japonica]	--	--	--
Unigene11101_Taxus	274	98	30.9193	--	--	--	--	--	--	--
Unigene11102_Taxus	234	11	4.0638	--	--	--	--	--	--	--
Unigene11103_Taxus	365	42	9.9474	--	--	--	--	--	--	--
Unigene11104_Taxus	602	31	4.4516	gi|115446699|ref|NP_001047129.1|	274	8e-73	Os02g0556400 [Oryza sativa (japonica cultivar-group)]	Q6NS23	142	2e-33
Unigene11105_Taxus	391	29	6.4117	--	--	--	--	--	--	--
Unigene11106_Taxus	238	14	5.0852	gi|15239171|ref|NP_196175.1|	66.2	2e-10	EMB2771 (EMBRYO DEFECTIVE 2771); ubiquitin-protein ligase [Arabidopsis thaliana] >gi|10178133|dbj|BAB11545.1| meiotic check point regulator-like protein [Arabidopsis thaliana]	--	--	--
Unigene11107_Taxus	1174	138	10.1617	gi|42568733|ref|NP_201147.2|	459	1e-164	emb2746 (embryo defective 2746); DNA binding / catalytic/ hydrolase [Arabidopsis thaliana]	P54122	207	9e-69
Unigene11108_Taxus	960	176	15.8487	gi|255678081|dbj|BAH94075.1|	186	2e-51	Os07g0692401 [Oryza sativa Japonica Group]	--	--	--
Unigene11109_Taxus	1042	805	66.7854	gi|115477487|ref|NP_001062339.1|	399	1e-110	Os08g0532400 [Oryza sativa (japonica cultivar-group)] >gi|42761382|dbj|BAD11650.1| nodulin-related protein-like [Oryza sativa Japonica Group] >gi|113624308|dbj|BAF24253.1| Os08g0532400 [Oryza sativa Japonica Group]	--	--	--
Unigene1110_Taxus	910	74	7.0298	gi|50313199|gb|AAT74547.1|	98.6	2e-19	omega gliadin [Aegilops tauschii]	Q54VY3	72.8	3e-12
Unigene11110_Taxus	920	133	12.4973	gi|115470783|ref|NP_001058990.1|	238	2e-61	Os07g0170200 [Oryza sativa (japonica cultivar-group)] >gi|113610526|dbj|BAF20904.1| Os07g0170200 [Oryza sativa Japonica Group]	--	--	--
Unigene11111_Taxus	247	17	5.9498	--	--	--	--	--	--	--
Unigene11112_Taxus	1406	154	9.4687	gi|42567629|ref|NP_196027.3|	191	1e-78	short-chain dehydrogenase/reductase (SDR) family protein [Arabidopsis thaliana] >gi|44681364|gb|AAS47622.1| At5g04070 [Arabidopsis thaliana] >gi|45773892|gb|AAS76750.1| At5g04070 [Arabidopsis thaliana]	Q8N5I4	75.1	1e-21
Unigene11113_Taxus	414	36	7.5172	gi|157101238|dbj|BAF79950.1|	66.6	8e-16	receptor-like kinase [Marchantia polymorpha]	--	--	--
Unigene11114_Taxus	983	158	13.895	gi|15242307|ref|NP_199325.1|	202	1e-50	aspartyl protease family protein [Arabidopsis thaliana] >gi|9758987|dbj|BAB09497.1| chloroplast nucleoid DNA-binding protein-like [Arabidopsis thaliana]	Q766C3	106	2e-22
Unigene11115_Taxus	247	10	3.4999	--	--	--	--	--	--	--
Unigene11116_Taxus	988	85	7.4373	gi|168016302|ref|XP_001760688.1|	130	7e-44	predicted protein [Physcomitrella patens subsp. patens] >gi|162688048|gb|EDQ74427.1| predicted protein [Physcomitrella patens subsp. patens]	--	--	--
Unigene11117_Taxus	239	62	22.4258	gi|115487944|ref|NP_001066459.1|	152	1e-36	Os12g0235800 [Oryza sativa (japonica cultivar-group)] >gi|113648966|dbj|BAF29478.1| Os12g0235800 [Oryza sativa Japonica Group]	Q9SZX3	151	1e-36
Unigene11118_Taxus	1950	1131	50.1397	gi|226503986|ref|NP_001150819.1|	511	1e-143	DNA methyltransferase 1-associated protein 1 [Zea mays] >gi|195642178|gb|ACG40557.1| DNA methyltransferase 1-associated protein 1 [Zea mays]	Q9JI44	158	1e-37
Unigene11119_Taxus	1380	523	32.7624	gi|164604828|dbj|BAF98466.1|	368	1e-106	cytochrome P450 [Coptis japonica var. dissecta]	Q05047	332	5e-90
Unigene1111_Taxus	1467	260	15.3213	gi|270226585|emb|CBI15319.1|	63.5	1e-08	unnamed protein product [Vitis vinifera]	--	--	--
Unigene11120_Taxus	1592	618	33.5582	gi|73672049|gb|AAZ80386.1|	379	1e-104	2-C-methyl-D-erythritol 4-phosphate cytidylyltransferase [Ginkgo biloba]	P69834	353	2e-96
Unigene11121_Taxus	542	15	2.3925	gi|240255958|ref|NP_567522.5|	62.4	5e-09	peptidyl-prolyl cis-trans isomerase [Arabidopsis thaliana] >gi|15912321|gb|AAL08294.1| AT4g17070/dl4565c [Arabidopsis thaliana] >gi|23505941|gb|AAN28830.1| At4g17070/dl4565c [Arabidopsis thaliana]	--	--	--
Unigene11122_Taxus	1524	276	15.6559	--	--	--	--	--	--	--
Unigene11123_Taxus	332	12	3.1246	gi|240255309|ref|NP_187566.4|	53.9	9e-07	protein binding [Arabidopsis thaliana]	Q9C7A2	51.2	2e-06
Unigene11124_Taxus	323	25	6.691	--	--	--	--	--	--	--
Unigene11125_Taxus	423	54	11.0359	gi|157101240|dbj|BAF79951.1|	177	7e-44	receptor-like kinase [Marchantia polymorpha]	Q9LX66	151	1e-36
Unigene11126_Taxus	666	109	14.1483	gi|115455355|ref|NP_001051278.1|	196	3e-62	Os03g0749800 [Oryza sativa (japonica cultivar-group)] >gi|113549749|dbj|BAF13192.1| Os03g0749800 [Oryza sativa Japonica Group]	Q39238	169	8e-51
Unigene11127_Taxus	400	13	2.8096	gi|15228863|ref|NP_188920.1|	100	1e-20	phosphoinositide binding [Arabidopsis thaliana]	--	--	--
Unigene11128_Taxus	450	46	8.8369	--	--	--	--	--	--	--
Unigene11129_Taxus	1249	276	19.1029	gi|30689631|ref|NP_195044.2|	182	8e-64	hydrolase, alpha/beta fold family protein [Arabidopsis thaliana] >gi|208879516|gb|ACI31303.1| At4g33180 [Arabidopsis thaliana]	Q52532	65.9	6e-10
Unigene1112_Taxus	203	5	2.1293	--	--	--	--	--	--	--
Unigene11130_Taxus	1410	770	47.209	gi|15226955|ref|NP_178345.1|	410	1e-113	cinnamoyl-CoA reductase family [Arabidopsis thaliana]	P51103	199	5e-50
Unigene11131_Taxus	244	20	7.0859	gi|9295706|gb|AAF87012.1|AC005292_21	139	1e-32	F26F24.20 [Arabidopsis thaliana]	--	--	--
Unigene11132_Taxus	499	184	31.8765	gi|15219876|ref|NP_173656.1|	164	9e-40	UGT85A1; UDP-glycosyltransferase/ cis-zeatin O-beta-D-glucosyltransferase/ glucuronosyltransferase/ trans-zeatin O-beta-D-glucosyltransferase/ transferase, transferring glycosyl groups / transferase, transferring hexosyl groups [Arabidopsis thaliana] >gi|66774037|sp|Q9SK82.1|COGT2_ARATH RecName: Full=Cytokinin-O-glucosyltransferase 2; AltName: Full=Zeatin O-glucosyltransferase 2; Short=AtZOG2; Al…	Q9SK82	164	3e-40
Unigene11133_Taxus	1572	414	22.7668	gi|115477571|ref|NP_001062381.1|	566	1e-168	Os08g0540100 [Oryza sativa (japonica cultivar-group)] >gi|113624350|dbj|BAF24295.1| Os08g0540100 [Oryza sativa Japonica Group]	P54967	556	1e-165
Unigene11134_Taxus	518	52	8.6781	gi|115470693|ref|NP_001058945.1|	76.6	2e-13	Os07g0162100 [Oryza sativa (japonica cultivar-group)] >gi|22831097|dbj|BAC15959.1| steroid 5alpha-reductase-like protein [Oryza sativa Japonica Group] >gi|113610481|dbj|BAF20859.1| Os07g0162100 [Oryza sativa Japonica Group]	--	--	--
Unigene11135_Taxus	673	128	16.4418	gi|158954529|gb|ABW84241.1|	427	1e-119	10-deacetylbaccatin III-10-O-acetyl transferase [Taxus wallichiana var. mairei]	Q9M6E2	427	1e-119
Unigene11136_Taxus	1357	563	35.8659	gi|15241211|ref|NP_200453.1|	90.1	1e-16	F-box family protein [Arabidopsis thaliana] >gi|42573694|ref|NP_974943.1| F-box family protein [Arabidopsis thaliana] >gi|75262699|sp|Q9FM89.1|FDL38_ARATH RecName: Full=F-box/FBD/LRR-repeat protein At5g56420	Q9FM89	90.1	3e-17
Unigene11137_Taxus	907	126	12.0093	gi|6715637|gb|AAF26464.1|AC007323_5	224	2e-71	T25K16.17 [Arabidopsis thaliana]	--	--	--
Unigene11138_Taxus	914	272	25.7262	--	--	--	--	--	--	--
Unigene11139_Taxus	321	47	12.6575	--	--	--	--	--	--	--
Unigene1113_Taxus	213	38	15.4226	gi|186523158|ref|NP_197072.3|	92.8	2e-18	binding [Arabidopsis thaliana]	--	--	--
Unigene11140_Taxus	1327	266	17.3286	gi|224038408|gb|ACN38308.1|	72.4	2e-11	ARGOS [Brassica rapa subsp. pekinensis]	--	--	--
Unigene11141_Taxus	283	13	3.9711	--	--	--	--	--	--	--
Unigene11142_Taxus	916	98	9.2488	gi|145360279|ref|NP_180014.2|	222	5e-76	ATP binding / kinase/ protein kinase/ protein serine/threonine kinase [Arabidopsis thaliana] >gi|91806264|gb|ABE65860.1| protein kinase family protein [Arabidopsis thaliana]	Q8S8S7	199	7e-65
Unigene11143_Taxus	961	61	5.4873	gi|42569320|ref|NP_180137.2|	162	5e-61	emb2410 (embryo defective 2410) [Arabidopsis thaliana]	--	--	--
Unigene11144_Taxus	255	39	13.2214	gi|270255531|emb|CBI37915.1|	57	1e-07	unnamed protein product [Vitis vinifera]	--	--	--
Unigene11145_Taxus	397	37	8.0568	gi|224072174|ref|XP_002303637.1|	68.2	5e-11	proline transporter [Populus trichocarpa] >gi|222841069|gb|EEE78616.1| proline transporter [Populus trichocarpa]	--	--	--
Unigene11146_Taxus	863	70	7.012	--	--	--	--	--	--	--
Unigene11147_Taxus	584	74	10.954	gi|42565171|ref|NP_189132.2|	85.9	5e-16	DNA binding [Arabidopsis thaliana]	--	--	--
Unigene11148_Taxus	683	61	7.7208	gi|24461867|gb|AAN62354.1|AF506028_23	279	4e-74	CTV.22 [Citrus trifoliata]	--	--	--
Unigene11149_Taxus	991	187	16.3125	--	--	--	--	--	--	--
Unigene1114_Taxus	225	55	21.1317	--	--	--	--	--	--	--
Unigene11150_Taxus	695	77	9.5777	gi|115446923|ref|NP_001047241.1|	214	1e-54	Os02g0581000 [Oryza sativa (japonica cultivar-group)] >gi|113536772|dbj|BAF09155.1| Os02g0581000 [Oryza sativa Japonica Group]	Q9R1S3	112	2e-24
Unigene11151_Taxus	448	235	45.3465	gi|15228302|ref|NP_188294.1|	100	7e-21	ATL2; protein binding / zinc ion binding [Arabidopsis thaliana] >gi|68565202|sp|Q8L9T5.2|ATL3F_ARATH RecName: Full=RING-H2 finger protein ATL3F; AltName: Full=RING-H2 finger protein ATL2 >gi|11994627|dbj|BAB02764.1| RING zinc finger protein-like [Arabidopsis thaliana] >gi|17065578|gb|AAL32943.1| RING zinc finger protein-like [Arabidopsis thaliana] >gi|20148585|gb|AAM10183.1| RING zinc finger prot…	Q8L9T5	100	3e-21
Unigene11152_Taxus	838	132	13.6171	gi|115437824|ref|NP_001043390.1|	245	7e-64	Os01g0575500 [Oryza sativa (japonica cultivar-group)] >gi|113532921|dbj|BAF05304.1| Os01g0575500 [Oryza sativa Japonica Group]	--	--	--
Unigene11153_Taxus	270	3	0.9605	--	--	--	--	--	--	--
Unigene11154_Taxus	518	17	2.8371	gi|224089995|ref|XP_002308898.1|	159	5e-42	condensin complex components subunit [Populus trichocarpa] >gi|222854874|gb|EEE92421.1| condensin complex components subunit [Populus trichocarpa]	Q8K2Z4	79	1e-14
Unigene11155_Taxus	225	7	2.6895	gi|15222937|ref|NP_172827.1|	64.3	1e-17	CYP78A5; electron carrier/ heme binding / iron ion binding / monooxygenase/ oxygen binding [Arabidopsis thaliana] >gi|8920576|gb|AAF81298.1|AC027656_15 Strong similarity to cytochrome P-450 from Phalaenopsis sp. SM9108 gb|U34744. It contains a cytochrome P450 domain PF|00067. EST gb|T45256 comes from this gene [Arabidopsis thaliana] >gi|63003816|gb|AAY25437.1| At1g13710 [Arabidopsis thaliana] >gi…	O48927	64.3	1e-15
Unigene11156_Taxus	207	15	6.2643	gi|239794418|dbj|BAH73414.1|	52.4	3e-06	hypothetical chloroplast RF2 [Cryptomeria japonica]	--	--	--
Unigene11157_Taxus	383	3054	689.325	--	--	--	--	--	--	--
Unigene11158_Taxus	225	26	9.9895	--	--	--	--	--	--	--
Unigene11159_Taxus	240	11	3.9622	--	--	--	--	--	--	--
Unigene1115_Taxus	415	23	4.7911	--	--	--	--	--	--	--
Unigene11160_Taxus	271	3	0.957	--	--	--	--	--	--	--
Unigene11161_Taxus	731	73	8.6329	gi|15241687|ref|NP_195833.1|	107	3e-22	NDP1 (RANDOM POTATO CDNA CLONE); binding [Arabidopsis thaliana] >gi|98961125|gb|ABF59046.1| At5g02130 [Arabidopsis thaliana]	--	--	--
Unigene11162_Taxus	476	53	9.6255	gi|255671052|dbj|BAF09226.2|	56.2	9e-09	Os02g0595300 [Oryza sativa Japonica Group]	--	--	--
Unigene11163_Taxus	250	119	41.1491	--	--	--	--	--	--	--
Unigene11164_Taxus	1783	499	24.1937	gi|51536068|dbj|BAD38194.1|	112	3e-23	mitochondrial transcription termination factor-like [Oryza sativa Japonica Group] >gi|255676844|dbj|BAF19105.2| Os06g0224700 [Oryza sativa Japonica Group]	Q6P6Q6	59.7	7e-08
Unigene11165_Taxus	591	32	4.6808	gi|18411172|ref|NP_565138.1|	52.8	5e-06	transporter-related [Arabidopsis thaliana] >gi|16604380|gb|AAL24196.1| At1g76670/F28O16_4 [Arabidopsis thaliana] >gi|23308311|gb|AAN18125.1| At1g76670/F28O16_4 [Arabidopsis thaliana] >gi|46934766|emb|CAG18177.1| UDP-galactose transporter [Arabidopsis thaliana]	--	--	--
Unigene11166_Taxus	238	6	2.1794	--	--	--	--	--	--	--
Unigene11167_Taxus	1687	471	24.1357	gi|108711353|gb|ABF99148.1|	183	1e-44	expressed protein [Oryza sativa (japonica cultivar-group)]	Q5U3H3	60.1	5e-08
Unigene11168_Taxus	278	7	2.1767	--	--	--	--	--	--	--
Unigene11169_Taxus	686	46	5.7968	--	--	--	--	--	--	--
Unigene1116_Taxus	265	21	6.8506	gi|115476712|ref|NP_001061952.1|	102	2e-21	Os08g0452100 [Oryza sativa (japonica cultivar-group)] >gi|113623921|dbj|BAF23866.1| Os08g0452100 [Oryza sativa Japonica Group]	O65351	86.3	5e-17
Unigene11170_Taxus	2113	343	14.0329	gi|18087555|gb|AAL58909.1|AF462819_1	705	0	At2g46700/T3A4.8 [Arabidopsis thaliana]	P53681	635	0
Unigene11171_Taxus	248	60	20.9148	gi|115472671|ref|NP_001059934.1|	62	4e-09	Os07g0549700 [Oryza sativa (japonica cultivar-group)]	Q84ZC0	62	1e-09
Unigene11172_Taxus	1998	615	26.6093	gi|266706030|gb|ACY78343.1|	901	0	phytoene desaturase [Diospyros kaki]	Q07356	898	0
Unigene11173_Taxus	540	215	34.419	--	--	--	--	--	--	--
Unigene11174_Taxus	495	31	5.4139	gi|14190517|gb|AAK55739.1|AF380658_1	78.2	3e-16	At1g53031 [Arabidopsis thaliana] >gi|15809782|gb|AAL06819.1| At1g53031 [Arabidopsis thaliana]	--	--	--
Unigene11175_Taxus	359	21	5.0568	--	--	--	--	--	--	--
Unigene11176_Taxus	254	8	2.7228	--	--	--	--	--	--	--
Unigene11177_Taxus	946	312	28.5113	gi|57157863|dbj|BAD83884.1|	152	1e-35	FOLDED PETALS [Arabidopsis thaliana]	Q93ZR6	144	1e-33
Unigene11178_Taxus	982	89	7.8349	gi|4138343|emb|CAA09896.1|	196	1e-100	RNA-directed RNA polymerase [Petunia x hybrida]	Q0DXS3	180	4e-91
Unigene11179_Taxus	257	17	5.7183	--	--	--	--	--	--	--
Unigene1117_Taxus	1047	87	7.1833	gi|115450799|ref|NP_001049000.1|	209	4e-65	Os03g0153900 [Oryza sativa (japonica cultivar-group)] >gi|108706244|gb|ABF94039.1| FAD binding domain containing protein, expressed [Oryza sativa (japonica cultivar-group)] >gi|113547471|dbj|BAF10914.1| Os03g0153900 [Oryza sativa Japonica Group]	O06489	40.8	6e-06
Unigene11180_Taxus	2047	364	15.3722	gi|115445559|ref|NP_001046559.1|	438	1e-180	Os02g0281000 [Oryza sativa (japonica cultivar-group)] >gi|113536090|dbj|BAF08473.1| Os02g0281000 [Oryza sativa Japonica Group]	Q9SL76	412	1e-169
Unigene11181_Taxus	226	47	17.9781	--	--	--	--	--	--	--
Unigene11182_Taxus	1579	254	13.9061	gi|225423792|ref|XP_002277492.1|	405	0	PREDICTED: similar to protein transporter [Vitis vinifera]	Q96P70	149	5e-35
Unigene11183_Taxus	286	12	3.6272	gi|224434566|dbj|BAH23787.1|	150	7e-36	MraY transferase [Physcomitrella patens] >gi|224434570|dbj|BAH23789.1| MraY transferase [Physcomitrella patens]	O49730	137	3e-32
Unigene11184_Taxus	644	373	50.0699	gi|238481261|ref|NP_001154712.1|	175	7e-43	ATGSL12 (glucan synthase-like 12); 1,3-beta-glucan synthase/ transferase, transferring glycosyl groups [Arabidopsis thaliana]	Q9LXT9	175	2e-43
Unigene11185_Taxus	268	44	14.1929	--	--	--	--	--	--	--
Unigene11186_Taxus	244	52	18.4233	--	--	--	--	--	--	--
Unigene11187_Taxus	338	39	9.9747	--	--	--	--	--	--	--
Unigene11188_Taxus	243	13	4.6248	gi|159488226|ref|XP_001702118.1|	111	4e-24	peptide-chain release factor [Chlamydomonas reinhardtii] >gi|158271387|gb|EDO97207.1| peptide-chain release factor [Chlamydomonas reinhardtii]	P73473	116	5e-26
Unigene11189_Taxus	1764	236	11.5656	gi|115463671|ref|NP_001055435.1|	166	2e-39	Os05g0389600 [Oryza sativa (japonica cultivar-group)] >gi|113578986|dbj|BAF17349.1| Os05g0389600 [Oryza sativa Japonica Group]	Q93Z92	71.6	2e-11
Unigene1118_Taxus	226	2	0.765	--	--	--	--	--	--	--
Unigene11190_Taxus	1232	524	36.7683	--	--	--	--	--	--	--
Unigene11191_Taxus	675	82	10.5018	gi|87240844|gb|ABD32702.1|	202	4e-51	Chalcone and stilbene synthases, N-terminal; Chalcone and stilbene synthases, C-terminal; Very-long-chain 3-ketoacyl-CoA synthase [Medicago truncatula]	Q9C6L5	196	1e-49
Unigene11192_Taxus	447	48	9.283	--	--	--	--	--	--	--
Unigene11193_Taxus	269	20	6.4273	gi|195642814|gb|ACG40875.1|	156	1e-37	thioredoxin-like protein 4B [Zea mays]	Q9NX01	115	8e-26
Unigene11194_Taxus	546	81	12.8247	gi|195642814|gb|ACG40875.1|	197	7e-50	thioredoxin-like protein 4B [Zea mays]	Q9NX01	141	3e-33
Unigene11195_Taxus	709	117	14.2657	gi|115447285|ref|NP_001047422.1|	234	1e-60	Os02g0614100 [Oryza sativa (japonica cultivar-group)] >gi|113536953|dbj|BAF09336.1| Os02g0614100 [Oryza sativa Japonica Group]	Q18779	96.7	1e-19
Unigene11196_Taxus	252	9	3.0874	gi|225424965|ref|XP_002265191.1|	43.5	2e-08	PREDICTED: similar to Leucine Rich Repeat family protein [Vitis vinifera]	--	--	--
Unigene11197_Taxus	388	89	19.8295	gi|15223677|ref|NP_172871.1|	83.6	1e-15	glucose-methanol-choline (GMC) oxidoreductase family protein [Arabidopsis thaliana] >gi|5080795|gb|AAD39305.1|AC007576_28 Similar to mandelonitrile lyase [Arabidopsis thaliana]	O50048	75.1	1e-13
Unigene11198_Taxus	405	14	2.9883	--	--	--	--	Q9LFF1	38.9	8e-06
Unigene11199_Taxus	370	26	6.0747	--	--	--	--	--	--	--
Unigene1119_Taxus	225	6	2.3053	--	--	--	--	--	--	--
Unigene111_Taxus	580	350	52.1667	gi|15225603|ref|NP_181527.1|	137	1e-31	transferase family protein [Arabidopsis thaliana] >gi|13937226|gb|AAK50105.1|AF372968_1 At2g39980/T28M21.14 [Arabidopsis thaliana] >gi|21700883|gb|AAM70565.1| At2g39980/T28M21.14 [Arabidopsis thaliana] >gi|91805487|gb|ABE65472.1| transferase family protein [Arabidopsis thaliana]	Q9SND9	73.2	1e-12
Unigene11200_Taxus	325	20	5.3199	--	--	--	--	--	--	--
Unigene11201_Taxus	336	13	3.3447	--	--	--	--	--	--	--
Unigene11202_Taxus	1226	477	33.6342	gi|56201391|dbj|BAD72949.1|	364	3e-99	myosin XI [Nicotiana tabacum]	P54696	187	1e-46
Unigene11203_Taxus	399	38	8.2331	gi|3850576|gb|AAC72116.1|	149	2e-35	Strong similarity to gb|U04968 nucleotide excision repair protein (ERCC2) from Cricetulus grisseus [Arabidopsis thaliana]	Q8W4M7	149	5e-36
Unigene11204_Taxus	1350	463	29.6484	gi|33338872|gb|AAQ14193.1|AF238305_1	223	1e-56	calcium homeostasis regulator CHoR1 [Solanum tuberosum]	--	--	--
Unigene11205_Taxus	264	11	3.602	--	--	--	--	--	--	--
Unigene11206_Taxus	1289	273	18.3089	gi|229609847|gb|ACQ83539.1|	285	2e-75	calcineurin B-like protein 01 [Physcomitrella patens]	Q8LEM7	271	6e-72
Unigene11207_Taxus	567	46	7.0134	gi|18414696|ref|NP_567508.1|	165	3e-43	PRMT7 (PROTEIN ARGININE METHYLTRANSFERASE 7); methyltransferase [Arabidopsis thaliana] >gi|152013356|sp|Q944R7.2|ANM7_ARATH RecName: Full=Protein arginine N-methyltransferase 7	A2Y8B9	177	4e-44
Unigene11208_Taxus	512	48	8.1045	--	--	--	--	--	--	--
Unigene11209_Taxus	1870	652	30.1411	gi|195606540|gb|ACG25100.1|	449	1e-124	C-1-tetrahydrofolate synthase, cytoplasmic [Zea mays]	Q2RIB4	306	4e-82
Unigene1120_Taxus	999	136	11.7687	gi|115452951|ref|NP_001050076.1|	226	5e-58	Os03g0343300 [Oryza sativa (japonica cultivar-group)] >gi|108708082|gb|ABF95877.1| Utp14 protein, expressed [Oryza sativa (japonica cultivar-group)]	P87137	124	1e-27
Unigene11210_Taxus	1971	958	42.0177	gi|14517540|gb|AAK62660.1|	165	4e-39	AT3g50910/F18B3_190 [Arabidopsis thaliana] >gi|27764930|gb|AAO23586.1| At3g50910/F18B3_190 [Arabidopsis thaliana]	--	--	--
Unigene11211_Taxus	226	5	1.9126	--	--	--	--	--	--	--
Unigene11212_Taxus	273	25	7.9165	--	--	--	--	--	--	--
Unigene11213_Taxus	249	21	7.2908	gi|42566185|ref|NP_567173.3|	47.8	4e-11	MATE efflux family protein [Arabidopsis thaliana]	--	--	--
Unigene11214_Taxus	2718	424	13.4856	--	--	--	--	--	--	--
Unigene11215_Taxus	372	47	10.9222	--	--	--	--	--	--	--
Unigene11216_Taxus	409	49	10.3568	gi|79318128|ref|NP_001031064.1|	77.8	6e-14	ATLP-1 [Arabidopsis thaliana]	P50699	77.8	2e-14
Unigene11217_Taxus	319	6	1.626	gi|115436322|ref|NP_001042919.1|	73.9	9e-13	Os01g0328900 [Oryza sativa (japonica cultivar-group)] >gi|113532450|dbj|BAF04833.1| Os01g0328900 [Oryza sativa Japonica Group]	Q9ASW1	61.2	2e-09
Unigene11218_Taxus	476	37	6.7197	--	--	--	--	--	--	--
Unigene11219_Taxus	551	251	39.38	gi|9755631|emb|CAC01785.1|	77	2e-13	Carboxylesterase-like protein [Arabidopsis thaliana]	--	--	--
Unigene1121_Taxus	492	32	5.6226	--	--	--	--	--	--	--
Unigene11220_Taxus	1084	605	48.248	gi|18397866|ref|NP_565376.1|	114	3e-24	zinc finger (C3HC4-type RING finger) family protein [Arabidopsis thaliana] >gi|66865916|gb|AAY57592.1| RING finger family protein [Arabidopsis thaliana] >gi|149944335|gb|ABR46210.1| At2g15580 [Arabidopsis thaliana] >gi|222423846|dbj|BAH19888.1| AT2G15580 [Arabidopsis thaliana]	Q3T0W3	63.9	2e-09
Unigene11221_Taxus	1143	254	19.2106	gi|39579116|gb|AAR28754.1|	266	5e-70	Bax inhibitor [Solanum lycopersicum]	Q9LD45	259	3e-68
Unigene11222_Taxus	2444	402	14.2193	gi|42569702|ref|NP_181288.3|	196	1e-134	PHD finger family protein [Arabidopsis thaliana]	Q9Z0E3	65.5	2e-09
Unigene11223_Taxus	347	14	3.4878	gi|116789479|gb|ABK25261.1|	67.4	8e-11	unknown [Picea sitchensis]	--	--	--
Unigene11224_Taxus	289	11	3.2904	--	--	--	--	--	--	--
Unigene11225_Taxus	237	65	23.7093	--	--	--	--	--	--	--
Unigene11226_Taxus	229	27	10.1925	--	--	--	--	--	--	--
Unigene11227_Taxus	1370	208	13.1249	gi|38566676|gb|AAR24228.1|	244	3e-63	At1g30300 [Arabidopsis thaliana] >gi|40824143|gb|AAR92355.1| At1g30300 [Arabidopsis thaliana]	O74545	99	2e-29
Unigene11228_Taxus	759	101	11.5036	--	--	--	--	--	--	--
Unigene11229_Taxus	4639	1218	22.6974	gi|115447513|ref|NP_001047536.1|	870	0	Os02g0639000 [Oryza sativa (japonica cultivar-group)] >gi|49388226|dbj|BAD25346.1| double-stranded RNA-binding domain (DsRBD)-containing protein-like [Oryza sativa Japonica Group] >gi|49388720|dbj|BAD25901.1| double-stranded RNA-binding domain (DsRBD)-containing protein-like [Oryza sativa Japonica Group] >gi|113537067|dbj|BAF09450.1| Os02g0639000 [Oryza sativa Japonica Group]	Q5YDB6	810	0
Unigene1122_Taxus	223	12	4.6519	--	--	--	--	--	--	--
Unigene11230_Taxus	301	23	6.6056	--	--	--	--	--	--	--
Unigene11231_Taxus	343	135	34.0246	--	--	--	--	--	--	--
Unigene11232_Taxus	250	15	5.1869	gi|124360886|gb|ABN08858.1|	66.6	1e-10	Peptidase S26A, signal peptidase I; WD40-like [Medicago truncatula]	--	--	--
Unigene11233_Taxus	419	18	3.7137	gi|2191130|gb|AAB61017.1|	126	1e-28	A_IG002N01.7 gene product [Arabidopsis thaliana]	--	--	--
Unigene11234_Taxus	252	26	8.9192	gi|15217493|ref|NP_177302.1|	46.2	6e-06	pentatricopeptide (PPR) repeat-containing protein [Arabidopsis thaliana] >gi|75169718|sp|Q9C9I3.1|PP115_ARATH RecName: Full=Pentatricopeptide repeat-containing protein At1g71460, chloroplastic; Flags: Precursor	Q9C9I3	46.2	2e-06
Unigene11235_Taxus	1346	215	13.8085	gi|226509138|ref|NP_001149280.1|	198	2e-71	triacylglycerol lipase [Zea mays] >gi|195625982|gb|ACG34821.1| triacylglycerol lipase [Zea mays]	Q680C0	192	3e-48
Unigene11236_Taxus	636	21	2.8544	gi|18395562|ref|NP_027544.1|	62.4	7e-09	myb family transcription factor [Arabidopsis thaliana] >gi|16974544|gb|AAL31188.1| At2g03500/T4M8.7 [Arabidopsis thaliana] >gi|20197737|gb|AAD17450.2| expressed protein [Arabidopsis thaliana] >gi|22137230|gb|AAM91460.1| At2g03500/T4M8.7 [Arabidopsis thaliana]	--	--	--
Unigene11237_Taxus	359	21	5.0568	gi|224077822|ref|XP_002305423.1|	128	4e-29	chromatin remodeling complex subunit [Populus trichocarpa] >gi|222848387|gb|EEE85934.1| chromatin remodeling complex subunit [Populus trichocarpa]	Q8VY05	120	3e-27
Unigene11238_Taxus	388	3349	746.168	--	--	--	--	--	--	--
Unigene11239_Taxus	242	11	3.9294	--	--	--	--	--	--	--
Unigene1123_Taxus	876	42	4.1448	gi|168058698|ref|XP_001781344.1|	143	2e-68	ATP-binding cassette transporter, subfamily B, member 6, group TAP protein PpABCB6 [Physcomitrella patens subsp. patens] >gi|162667237|gb|EDQ53872.1| ATP-binding cassette transporter, subfamily B, member 6, group TAP protein PpABCB6 [Physcomitrella patens subsp. patens]	Q8RY46	127	6e-57
Unigene11240_Taxus	491	125	22.0081	gi|115436682|ref|NP_001043099.1|	268	4e-71	Os01g0385400 [Oryza sativa (japonica cultivar-group)] >gi|21743361|dbj|BAC03353.1| C4-dicarboxylate transporter-like protein [Oryza sativa Japonica Group] >gi|21952874|dbj|BAC06289.1| C4-dicarboxylate transporter-like protein [Oryza sativa Japonica Group] >gi|113532630|dbj|BAF05013.1| Os01g0385400 [Oryza sativa Japonica Group]	P44741	55.1	2e-07
Unigene11241_Taxus	327	16	4.2299	--	--	--	--	--	--	--
Unigene11242_Taxus	479	73	13.1747	--	--	--	--	--	--	--
Unigene11243_Taxus	6362	1634	22.203	gi|186515599|ref|NP_194988.2|	165	1e-38	nucleic acid binding [Arabidopsis thaliana]	P04929	86.3	3e-15
Unigene11244_Taxus	822	97	10.2013	--	--	--	--	--	--	--
Unigene11245_Taxus	304	3404	967.987	--	--	--	--	--	--	--
Unigene11246_Taxus	641	64	8.6313	gi|53759170|gb|AAU93341.1|	210	2e-53	taxadiene 5-alpha hydroxylase [Taxus wallichiana var. chinensis]	Q6WG30	210	5e-54
Unigene11247_Taxus	218	72	28.5515	--	--	--	--	--	--	--
Unigene11248_Taxus	1440	840	50.4278	gi|17065472|gb|AAL32890.1|	222	1e-56	Unknown protein [Arabidopsis thaliana]	Q11U74	76.3	5e-13
Unigene11249_Taxus	1224	56	3.9551	gi|115466932|ref|NP_001057065.1|	263	6e-88	Os06g0199100 [Oryza sativa (japonica cultivar-group)] >gi|113595105|dbj|BAF18979.1| Os06g0199100 [Oryza sativa Japonica Group]	Q5G1S8	248	8e-65
Unigene1124_Taxus	261	13	4.3058	gi|21536895|gb|AAM61227.1|	63.5	1e-09	amino acid transport protein AAP2 [Arabidopsis thaliana]	--	--	--
Unigene11250_Taxus	301	21	6.0312	--	--	--	--	--	--	--
Unigene11251_Taxus	1316	199	13.0723	gi|115463853|ref|NP_001055526.1|	248	3e-64	Os05g0409100 [Oryza sativa (japonica cultivar-group)] >gi|113579077|dbj|BAF17440.1| Os05g0409100 [Oryza sativa Japonica Group]	Q9FPQ6	57	3e-07
Unigene11252_Taxus	325	451	119.963	--	--	--	--	--	--	--
Unigene11253_Taxus	496	29	5.0544	gi|115481280|ref|NP_001064233.1|	117	1e-32	Os10g0170300 [Oryza sativa (japonica cultivar-group)] >gi|113638842|dbj|BAF26147.1| Os10g0170300 [Oryza sativa Japonica Group]	--	--	--
Unigene11254_Taxus	394	34	7.46	gi|28558088|sp|Q8LL69.1|DBNBT_TAXCA	187	5e-47	RecName: Full=3'-N-debenzoyl-2'-deoxytaxol N-benzoyltransferase; Short=DBTNBT >gi|21700317|gb|AAM75818.1|AF466397_1 3'-N-debenzoyltaxol N-benzoyltransferase [Taxus canadensis]	Q8LL69	187	2e-47
Unigene11255_Taxus	664	43	5.5983	gi|115462287|ref|NP_001054743.1|	178	4e-45	Os05g0164900 [Oryza sativa (japonica cultivar-group)] >gi|113578294|dbj|BAF16657.1| Os05g0164900 [Oryza sativa Japonica Group]	Q5R7B8	130	6e-30
Unigene11256_Taxus	406	166	35.3456	gi|151934195|gb|ABS18435.1|	53.9	9e-07	WRKY36 [Glycine max]	Q03751	33.1	1e-07
Unigene11257_Taxus	772	63	7.0547	gi|124360080|gb|ABN08096.1|	279	5e-74	Galactose mutarotase-like [Medicago truncatula]	Q40784	254	6e-67
Unigene11258_Taxus	298	12	3.4811	gi|224013241|ref|XP_002295272.1|	70.9	7e-12	predicted protein [Thalassiosira pseudonana CCMP1335] >gi|220968995|gb|EED87338.1| predicted protein [Thalassiosira pseudonana CCMP1335]	--	--	--
Unigene11259_Taxus	291	1354	402.234	gi|148910328|gb|ABR18243.1|	89.4	2e-17	unknown [Picea sitchensis]	--	--	--
Unigene1125_Taxus	247	2	0.7	gi|270252282|emb|CBI18893.1|	53.5	1e-06	unnamed protein product [Vitis vinifera]	--	--	--
Unigene11260_Taxus	577	33	4.9441	gi|226491786|ref|NP_001149447.1|	128	3e-49	esterase [Zea mays] >gi|195627298|gb|ACG35479.1| esterase [Zea mays]	--	--	--
Unigene11261_Taxus	832	88	9.1435	gi|79325316|ref|NP_001031737.1|	196	3e-64	AFG1-like ATPase family protein [Arabidopsis thaliana] >gi|53850477|gb|AAU95415.1| At4g28070 [Arabidopsis thaliana] >gi|56790192|gb|AAW30013.1| At4g28070 [Arabidopsis thaliana]	Q8WV93	75.9	8e-16
Unigene11262_Taxus	445	22	4.2738	--	--	--	--	--	--	--
Unigene11263_Taxus	1348	548	35.1434	gi|115482138|ref|NP_001064662.1|	70.1	1e-10	Os10g0430800 [Oryza sativa (japonica cultivar-group)] >gi|113639271|dbj|BAF26576.1| Os10g0430800 [Oryza sativa Japonica Group]	--	--	--
Unigene11264_Taxus	647	102	13.6285	gi|183229552|gb|ACC60274.1|	218	8e-56	aluminum-activated citrate transporter [Glycine max]	Q58119	60.1	1e-08
Unigene11265_Taxus	774	140	15.6365	gi|15229641|ref|NP_188473.1|	151	5e-60	AtALMT9 (aluminum-activated malate transporter 9); anion channel [Arabidopsis thaliana]	--	--	--
Unigene11266_Taxus	1767	489	23.9236	gi|115440111|ref|NP_001044335.1|	555	1e-157	Os01g0763600 [Oryza sativa (japonica cultivar-group)] >gi|113533866|dbj|BAF06249.1| Os01g0763600 [Oryza sativa Japonica Group]	P09394	118	1e-25
Unigene11267_Taxus	588	63	9.2623	gi|95106139|gb|ABF55221.1|	156	3e-50	auxin conjugate hydrolase [Medicago truncatula]	Q7XUA8	155	1e-46
Unigene11268_Taxus	842	132	13.5524	gi|168008743|ref|XP_001757066.1|	176	7e-43	GLP1 GID1-like protein [Physcomitrella patens subsp. patens] >gi|159902511|gb|ABX10762.1| gibberellin receptor GID1-like protein [Physcomitrella patens] >gi|162691937|gb|EDQ78297.1| GLP1 GID1-like protein [Physcomitrella patens subsp. patens]	Q940G6	123	1e-27
Unigene11269_Taxus	257	8	2.691	gi|240254326|ref|NP_176885.7|	39.7	3e-07	SWEETIE (SWEETIE); binding [Arabidopsis thaliana]	--	--	--
Unigene1126_Taxus	816	75	7.9456	gi|15234984|ref|NP_194257.1|	122	7e-27	pentatricopeptide (PPR) repeat-containing protein [Arabidopsis thaliana] >gi|75265547|sp|Q9SB36.1|PP337_ARATH RecName: Full=Pentatricopeptide repeat-containing protein At4g25270, chloroplastic; Flags: Precursor	Q9SB36	122	2e-27
Unigene11270_Taxus	910	425	40.3739	gi|30689895|ref|NP_850429.1|	133	5e-30	EMB2766 (EMBRYO DEFECTIVE 2766); structural constituent of nuclear pore [Arabidopsis thaliana]	Q555D2	103	2e-21
Unigene11271_Taxus	407	18	3.8232	gi|124361075|gb|ABN09047.1|	179	2e-44	Hypothetical plant protein [Medicago truncatula]	Q8W486	77.8	2e-14
Unigene11272_Taxus	584	46	6.8092	gi|60299997|gb|AAX18647.1|	286	3e-96	cellulose synthase catalytic subunit [Pinus taeda]	Q5JN63	276	9e-93
Unigene11273_Taxus	290	53	15.7991	--	--	--	--	--	--	--
Unigene11274_Taxus	243	9	3.2018	gi|30685543|ref|NP_173224.2|	73.2	2e-12	phosphoinositide binding [Arabidopsis thaliana] >gi|34098829|gb|AAQ56797.1| At1g17820 [Arabidopsis thaliana]	--	--	--
Unigene11275_Taxus	433	122	24.3571	--	--	--	--	--	--	--
Unigene11276_Taxus	582	78	11.5858	--	--	--	--	--	--	--
Unigene11277_Taxus	218	13	5.1551	--	--	--	--	--	--	--
Unigene11278_Taxus	403	30	6.4353	--	--	--	--	--	--	--
Unigene11279_Taxus	293	7	2.0653	--	--	--	--	--	--	--
Unigene1127_Taxus	1222	306	21.6473	gi|75319886|sp|Q50EK4.1|C75A1_PINTA	341	2e-92	RecName: Full=Cytochrome P450 750A1; AltName: Full=Cytochrome P450 CYPC >gi|59800268|gb|AAX07433.1| cytochrome P450 CYPC [Pinus taeda]	Q50EK4	341	7e-93
Unigene11280_Taxus	3293	1001	26.2782	gi|54695180|dbj|BAD67155.1|	341	8e-92	PpPPR_98 [Physcomitrella patens]	Q9FXH1	291	3e-77
Unigene11281_Taxus	266	27	8.7748	gi|115436784|ref|NP_001043135.1|	69.3	2e-18	Os01g0502400 [Oryza sativa (japonica cultivar-group)] >gi|56201538|dbj|BAD73185.1| oxidoreductase, 2OG-Fe(II) oxygenase-like protein [Oryza sativa Japonica Group] >gi|56201807|dbj|BAD73257.1| oxidoreductase, 2OG-Fe(II) oxygenase-like protein [Oryza sativa Japonica Group] >gi|113532666|dbj|BAF05049.1| Os01g0502400 [Oryza sativa Japonica Group]	Q3ED68	69.7	5e-17
Unigene11282_Taxus	711	162	19.6969	gi|115488854|ref|NP_001066914.1|	211	1e-53	Os12g0528400 [Oryza sativa (japonica cultivar-group)]	O22494	202	2e-51
Unigene11283_Taxus	248	77	26.8406	gi|110816011|gb|ABG91753.1|	54.3	7e-07	phenylpropenal double-bond reductase [Pinus taeda]	--	--	--
Unigene11284_Taxus	327	30	7.931	--	--	--	--	--	--	--
Unigene11285_Taxus	698	77	9.5365	gi|115480765|ref|NP_001063976.1|	136	1e-39	Os09g0569200 [Oryza sativa (japonica cultivar-group)] >gi|113632209|dbj|BAF25890.1| Os09g0569200 [Oryza sativa Japonica Group]	P16098	71.2	6e-12
Unigene11286_Taxus	351	17	4.1869	--	--	--	--	--	--	--
Unigene11287_Taxus	645	52	6.9694	gi|7271957|gb|AAF44708.1|AF242849_1	274	9e-73	wound-inducible carboxypeptidase [Solanum lycopersicum]	P37890	271	2e-72
Unigene11288_Taxus	338	12	3.0691	--	--	--	--	--	--	--
Unigene11289_Taxus	438	58	11.4474	gi|15238925|ref|NP_199046.1|	56.6	1e-07	pentatricopeptide (PPR) repeat-containing protein [Arabidopsis thaliana] >gi|75154282|sp|Q8L844.1|PP413_ARATH RecName: Full=Pentatricopeptide repeat-containing protein At5g42310, mitochondrial; Flags: Precursor >gi|21539517|gb|AAM53311.1| maize crp1 protein-like [Arabidopsis thaliana]	Q8L844	56.6	5e-08
Unigene1128_Taxus	2793	519	16.0639	gi|115480741|ref|NP_001063964.1|	817	0	Os09g0567700 [Oryza sativa (japonica cultivar-group)] >gi|75322277|sp|Q652L2.1|HIRA_ORYSJ RecName: Full=Protein HIRA; AltName: Full=Histone regulator protein >gi|113632197|dbj|BAF25878.1| Os09g0567700 [Oryza sativa Japonica Group]	Q652L2	817	0
Unigene11290_Taxus	1199	167	12.0407	gi|115486954|ref|NP_001065964.1|	204	4e-51	Os12g0110300 [Oryza sativa (japonica cultivar-group)] >gi|77553412|gb|ABA96208.1| expressed protein [Oryza sativa (japonica cultivar-group)] >gi|113648471|dbj|BAF28983.1| Os12g0110300 [Oryza sativa Japonica Group]	Q1JQE2	74.7	1e-12
Unigene11291_Taxus	2048	882	37.2299	gi|6735301|emb|CAB68128.1|	471	1e-151	UDP-GlcNAc:dolichol phosphate N-acetylglucosamine-1-phosphate transferase-like protein [Arabidopsis thaliana] >gi|21618187|gb|AAM67237.1| UDP-GlcNAc:dolichol phosphate N-acetylglucosamine-1-phosphate transferase-like protein [Arabidopsis thaliana] >gi|51968478|dbj|BAD42931.1| UDP-GlcNAc:dolichol phosphate N-acetylglucosamine-1-phosphate transferase-like protein [Arabidopsis thaliana] >gi|11531146…	P23338	283	5e-78
Unigene11292_Taxus	327	38	10.0459	gi|148906682|gb|ABR16490.1|	55.8	2e-07	unknown [Picea sitchensis]	--	--	--
Unigene11293_Taxus	777	49	5.4517	--	--	--	--	--	--	--
Unigene11294_Taxus	1183	132	9.6459	gi|30695719|ref|NP_191866.3|	152	2e-35	PWWP domain-containing protein [Arabidopsis thaliana]	Q8VHK7	63.2	4e-09
Unigene11295_Taxus	485	226	40.2829	gi|260766929|gb|ACX50406.1|	181	5e-45	histone H4 [Eriobotrya japonica]	Q76H85	181	2e-45
Unigene11296_Taxus	446	57	11.0483	gi|115460038|ref|NP_001053619.1|	105	3e-22	Os04g0574600 [Oryza sativa (japonica cultivar-group)] >gi|113565190|dbj|BAF15533.1| Os04g0574600 [Oryza sativa Japonica Group]	Q66H85	56.6	5e-08
Unigene11297_Taxus	220	4	1.5718	--	--	--	--	--	--	--
Unigene11298_Taxus	222	9	3.5046	--	--	--	--	--	--	--
Unigene11299_Taxus	4458	1777	34.4589	gi|115475109|ref|NP_001061151.1|	226	5e-57	Os08g0187700 [Oryza sativa (japonica cultivar-group)] >gi|113623120|dbj|BAF23065.1| Os08g0187700 [Oryza sativa Japonica Group]	O94913	89.4	2e-16
Unigene1129_Taxus	311	24	6.6712	gi|225451585|ref|XP_002275581.1|	67	1e-10	PREDICTED: similar to Tetratricopeptide-like helical [Vitis vinifera]	Q9CAA8	66.6	4e-11
Unigene112_Taxus	1574	911	50.0342	gi|225444704|ref|XP_002278093.1|	571	1e-161	PREDICTED: similar to aldehyde dehydrogenase family 7 member A1 [Vitis vinifera]	Q9SYG7	565	1e-160
Unigene11300_Taxus	1885	213	9.7684	gi|42563023|ref|NP_176917.2|	405	0	ATREV3 (ARABIDOPSIS THALIANA RECOVERY PROTEIN 3); DNA binding / DNA-directed DNA polymerase [Arabidopsis thaliana] >gi|34330129|dbj|BAC82450.1| catalytic subunit of polymerase zeta [Arabidopsis thaliana]	Q61493	333	1e-113
Unigene11301_Taxus	642	88	11.8495	--	--	--	--	--	--	--
Unigene11302_Taxus	1149	167	12.5646	gi|71040671|gb|AAZ20284.1|	170	5e-41	calcium-binding pollen allergen [Arachis hypogaea]	Q8RZB5	166	2e-40
Unigene11303_Taxus	269	95	30.5299	--	--	--	--	--	--	--
Unigene11304_Taxus	885	143	13.9684	gi|4456758|emb|CAB36910.1|	103	5e-21	heat shock protein 17.4 [Quercus suber]	P19036	98.6	5e-20
Unigene11305_Taxus	435	42	8.3467	--	--	--	--	--	--	--
Unigene11306_Taxus	253	7	2.3918	--	--	--	--	--	--	--
Unigene11307_Taxus	999	176	15.23	gi|15220198|ref|NP_178182.1|	377	1e-103	transducin family protein / WD-40 repeat family protein [Arabidopsis thaliana] >gi|83305440|sp|Q38942.2|RAE1L_ARATH RecName: Full=Rae1-like protein At1g80670 >gi|6503279|gb|AAF14655.1|AC011713_3 F23A5.2(form2) [Arabidopsis thaliana] >gi|94442413|gb|ABF18994.1| At1g80670 [Arabidopsis thaliana]	Q38942	377	1e-104
Unigene11308_Taxus	673	87	11.1753	gi|115453991|ref|NP_001050596.1|	85.1	1e-15	Os03g0595300 [Oryza sativa (japonica cultivar-group)] >gi|108709639|gb|ABF97434.1| expressed protein [Oryza sativa (japonica cultivar-group)] >gi|113549067|dbj|BAF12510.1| Os03g0595300 [Oryza sativa Japonica Group]	--	--	--
Unigene11309_Taxus	712	49	5.9494	gi|115487378|ref|NP_001066176.1|	47.4	2e-11	Os12g0152600 [Oryza sativa (japonica cultivar-group)] >gi|113648683|dbj|BAF29195.1| Os12g0152600 [Oryza sativa Japonica Group]	Q76C99	44.3	3e-08
Unigene1130_Taxus	1344	216	13.8934	gi|30678824|ref|NP_186983.2|	379	1e-104	short-chain dehydrogenase/reductase (SDR) family protein [Arabidopsis thaliana] >gi|22022575|gb|AAM83244.1| AT3g03330/T21P5_25 [Arabidopsis thaliana] >gi|23308299|gb|AAN18119.1| At3g03330/T21P5_25 [Arabidopsis thaliana]	Q9Y394	199	5e-50
Unigene11310_Taxus	1182	289	21.1365	gi|262263169|dbj|BAI48087.1|	132	1e-29	kinetochore protein [Nicotiana sylvestris]	--	--	--
Unigene11311_Taxus	2433	949	33.7192	gi|152926164|gb|ABS32235.1|	642	0	protein kinase [Carica papaya]	Q551H4	360	2e-98
Unigene11312_Taxus	361	839	200.913	--	--	--	--	--	--	--
Unigene11313_Taxus	472	26	4.762	gi|115470365|ref|NP_001058781.1|	78.2	6e-14	Os07g0120700 [Oryza sativa (japonica cultivar-group)] >gi|113610317|dbj|BAF20695.1| Os07g0120700 [Oryza sativa Japonica Group]	--	--	--
Unigene11314_Taxus	257	7	2.3546	--	--	--	--	--	--	--
Unigene11315_Taxus	236	15	5.4946	--	--	--	--	--	--	--
Unigene11316_Taxus	691	124	15.513	gi|115485947|ref|NP_001068117.1|	127	2e-28	Os11g0569500 [Oryza sativa (japonica cultivar-group)] >gi|113645339|dbj|BAF28480.1| Os11g0569500 [Oryza sativa Japonica Group]	Q9FL28	105	2e-22
Unigene11317_Taxus	212	6	2.4466	gi|15235534|ref|NP_195451.1|	52.4	2e-07	CYP81D3; electron carrier/ heme binding / iron ion binding / monooxygenase/ oxygen binding [Arabidopsis thaliana] >gi|4006851|emb|CAB16769.1| cytochrome P450-like protein [Arabidopsis thaliana] >gi|7270717|emb|CAB80400.1| cytochrome P450-like protein [Arabidopsis thaliana]	P93147	48.9	1e-07
Unigene11318_Taxus	871	248	24.6143	gi|224071513|ref|XP_002303496.1|	119	1e-25	f-box family protein [Populus trichocarpa] >gi|222840928|gb|EEE78475.1| f-box family protein [Populus trichocarpa]	Q8VYT5	117	1e-25
Unigene11319_Taxus	665	84	10.9197	gi|115473037|ref|NP_001060117.1|	155	5e-37	Os07g0584000 [Oryza sativa (japonica cultivar-group)] >gi|34393694|dbj|BAC82961.1| Yippee-like protein [Oryza sativa Japonica Group] >gi|113611653|dbj|BAF22031.1| Os07g0584000 [Oryza sativa Japonica Group]	Q8S5M8	139	2e-32
Unigene1131_Taxus	703	59	7.2552	gi|10639836|emb|CAC11136.1|	131	3e-41	phytochrome N [Pinus sylvestris]	Q40762	116	8e-33
Unigene11320_Taxus	1237	164	11.4611	gi|115446331|ref|NP_001046945.1|	239	1e-61	Os02g0513700 [Oryza sativa (japonica cultivar-group)]	--	--	--
Unigene11321_Taxus	458	68	12.835	gi|224132090|ref|XP_002321253.1|	188	4e-47	multidrug resistance protein ABC transporter family [Populus trichocarpa] >gi|222862026|gb|EEE99568.1| multidrug resistance protein ABC transporter family [Populus trichocarpa]	Q9M1C7	180	3e-45
Unigene11322_Taxus	522	30	4.9683	--	--	--	--	--	--	--
Unigene11323_Taxus	493	108	18.9378	gi|87162909|gb|ABD28704.1|	72.4	9e-24	WD40-like [Medicago truncatula]	--	--	--
Unigene11324_Taxus	306	8	2.2601	--	--	--	--	--	--	--
Unigene11325_Taxus	357	176	42.6185	gi|195625474|gb|ACG34567.1|	143	1e-33	mannose-P-dolichol utilization defect 1 protein [Zea mays]	Q9LTI3	133	4e-31
Unigene11326_Taxus	940	418	38.4416	gi|115465685|ref|NP_001056442.1|	132	8e-30	Os05g0582800 [Oryza sativa (japonica cultivar-group)] >gi|113579993|dbj|BAF18356.1| Os05g0582800 [Oryza sativa Japonica Group]	Q9M9Q6	124	1e-27
Unigene11327_Taxus	757	549	62.6946	gi|113734309|dbj|BAF30480.1|	141	2e-32	cytochrome c oxidase subunit Vb [Pisum sativum]	P29505	59.3	3e-08
Unigene11328_Taxus	274	10	3.155	--	--	--	--	--	--	--
Unigene11329_Taxus	1475	170	9.9635	gi|15221961|ref|NP_175308.1|	311	1e-113	delta-ADR (delta-adaptin); binding / clathrin binding / protein binding / protein transporter [Arabidopsis thaliana] >gi|30694404|ref|NP_849785.1| delta-ADR (delta-adaptin); binding / clathrin binding / protein binding / protein transporter [Arabidopsis thaliana] >gi|79319515|ref|NP_001031156.1| delta-ADR (delta-adaptin); binding / clathrin binding / protein binding / protein transporter [Arabido…	O14617	235	8e-83
Unigene1132_Taxus	901	322	30.8947	gi|15228345|ref|NP_187673.1|	241	2e-62	ATNUDX26 (ARABIDOPSIS THALIANA NUDIX HYDROLASE HOMOLOG 26); bis(5'-adenosyl)-pentaphosphatase/ bis(5'-nucleosyl)-tetraphosphatase (asymmetrical) [Arabidopsis thaliana] >gi|75308944|sp|Q9CAF2.1|NUD26_ARATH RecName: Full=Nudix hydrolase 26, chloroplastic; Short=AtNUDT26; AltName: Full=Bis(5'-nucleosyl)-tetraphosphatase (asymmetrical); Flags: Precursor	Q9CAF2	241	6e-63
Unigene11330_Taxus	850	81	8.238	gi|18390799|ref|NP_563794.1|	188	1e-46	thioredoxin family protein [Arabidopsis thaliana]	Q8LEK4	61.6	6e-09
Unigene11331_Taxus	1774	500	24.3652	gi|224140805|ref|XP_002323769.1|	118	5e-25	kip-related cyclin-dependent kinase inhibitor 1 [Populus trichocarpa] >gi|222866771|gb|EEF03902.1| kip-related cyclin-dependent kinase inhibitor 1 [Populus trichocarpa]	Q283L0	113	5e-24
Unigene11332_Taxus	938	52	4.7924	--	--	--	--	--	--	--
Unigene11333_Taxus	432	27	5.403	gi|42569807|ref|NP_181589.3|	139	1e-46	initiator tRNA phosphoribosyl transferase family protein [Arabidopsis thaliana] >gi|30725316|gb|AAP37680.1| At2g40570 [Arabidopsis thaliana]	P23796	72.8	2e-21
Unigene11334_Taxus	264	11	3.602	--	--	--	--	--	--	--
Unigene11335_Taxus	456	43	8.1519	gi|255673140|dbj|BAH91020.1|	64.7	2e-18	Os01g0296900 [Oryza sativa Japonica Group]	Q6J163	72.8	8e-13
Unigene11336_Taxus	422	139	28.4745	gi|15223025|ref|NP_172853.1|	53.9	9e-07	VIK (VH1-INTERACTING KINASE); ATP binding / protein kinase/ protein serine/threonine/tyrosine kinase [Arabidopsis thaliana] >gi|5080776|gb|AAD39286.1|AC007576_9 Similar to protein kinases [Arabidopsis thaliana] >gi|111074450|gb|ABH04598.1| At1g14000 [Arabidopsis thaliana]	--	--	--
Unigene11337_Taxus	3437	1630	40.9979	gi|33242909|gb|AAQ01158.1|	482	1e-134	transmembrane kinase [Oryza sativa]	Q9SYQ8	188	3e-46
Unigene11338_Taxus	304	33	9.3841	--	--	--	--	--	--	--
Unigene11339_Taxus	2242	383	14.7678	gi|87241137|gb|ABD32995.1|	262	3e-68	Homeodomain-related [Medicago truncatula]	Q08759	119	7e-26
Unigene1133_Taxus	264	8	2.6196	--	--	--	--	--	--	--
Unigene11340_Taxus	316	36	9.8485	--	--	--	--	--	--	--
Unigene11341_Taxus	1327	239	15.5697	gi|144905184|dbj|BAF56241.1|	280	1e-133	cytochrome P450 enzyme [Pisum sativum]	Q94IW5	285	1e-123
Unigene11342_Taxus	270	74	23.6931	--	--	--	--	--	--	--
Unigene11343_Taxus	2842	484	14.7223	gi|5880464|gb|AAD54660.1|AF088901_1	594	0	actin bundling protein ABP135 [Lilium longiflorum]	O81644	597	0
Unigene11344_Taxus	253	12	4.1003	--	--	--	--	--	--	--
Unigene11345_Taxus	453	70	13.3584	gi|115477463|ref|NP_001062327.1|	109	1e-25	Os08g0530500 [Oryza sativa (japonica cultivar-group)]	--	--	--
Unigene11346_Taxus	264	58	18.9923	gi|115452017|ref|NP_001049609.1|	101	5e-21	Os03g0258900 [Oryza sativa (japonica cultivar-group)] >gi|113548080|dbj|BAF11523.1| Os03g0258900 [Oryza sativa Japonica Group]	--	--	--
Unigene11347_Taxus	1503	93	5.3491	--	--	--	--	--	--	--
Unigene11348_Taxus	544	82	13.0307	gi|168047204|ref|XP_001776061.1|	277	9e-74	SWIRM domain protein [Physcomitrella patens subsp. patens] >gi|162672571|gb|EDQ59106.1| SWIRM domain protein [Physcomitrella patens subsp. patens]	Q9LID0	137	4e-32
Unigene11349_Taxus	376	19	4.3684	gi|42566885|ref|NP_193403.2|	188	3e-47	PSD1 (phosphatidylserine decarboxylase 1); phosphatidylserine decarboxylase [Arabidopsis thaliana] >gi|29468598|gb|AAO38842.1| phosphatidylserine decarboxylase [Arabidopsis thaliana] >gi|109946625|gb|ABG48491.1| At4g16700 [Arabidopsis thaliana]	P27465	114	2e-25
Unigene1134_Taxus	742	54	6.2913	gi|239056180|emb|CAQ58615.1|	271	1e-74	ATP binding / kinase/ protein serine / threonine kinase [Vitis vinifera]	O64483	184	5e-46
Unigene11350_Taxus	562	73	11.229	gi|168026710|ref|XP_001765874.1|	57.4	2e-07	predicted protein [Physcomitrella patens subsp. patens] >gi|162682780|gb|EDQ69195.1| predicted protein [Physcomitrella patens subsp. patens]	--	--	--
Unigene11351_Taxus	246	4	1.4057	--	--	--	--	--	--	--
Unigene11352_Taxus	608	108	15.3558	--	--	--	--	--	--	--
Unigene11353_Taxus	439	35	6.8922	gi|42566010|ref|NP_191322.3|	165	3e-40	exostosin family protein [Arabidopsis thaliana] >gi|44917463|gb|AAS49056.1| At3g57630 [Arabidopsis thaliana] >gi|46931284|gb|AAT06446.1| At3g57630 [Arabidopsis thaliana]	--	--	--
Unigene11354_Taxus	266	6	1.9499	gi|20141056|sp|Q9M2D2.2|YU88_ARATH	51.6	5e-06	RecName: Full=UPF0187 protein At3g61320, chloroplastic; Flags: Precursor >gi|16604549|gb|AAL24280.1| AT3g61320/T20K12_220 [Arabidopsis thaliana] >gi|23296291|gb|AAN12915.1| At3g61320/T20K12_220 [Arabidopsis thaliana]	Q9M2D2	51.6	1e-06
Unigene11355_Taxus	1105	197	15.4119	gi|283838931|gb|ADB44797.1|	236	2e-67	FCA [Vitis vinifera]	O04425	235	5e-61
Unigene11356_Taxus	264	16	5.2393	--	--	--	--	--	--	--
Unigene11357_Taxus	1330	228	14.8196	gi|224142645|ref|XP_002324665.1|	173	6e-44	Ca2+ antiporter/cation exchanger [Populus trichocarpa] >gi|222866099|gb|EEF03230.1| Ca2+ antiporter/cation exchanger [Populus trichocarpa]	--	--	--
Unigene11358_Taxus	224	301	116.164	--	--	--	--	--	--	--
Unigene11359_Taxus	499	29	5.024	gi|225436428|ref|XP_002272391.1|	51.2	7e-12	PREDICTED: hypothetical protein [Vitis vinifera]	--	--	--
Unigene1135_Taxus	342	19	4.8027	--	--	--	--	--	--	--
Unigene11360_Taxus	309	18	5.0358	gi|255564545|ref|XP_002523268.1|	47	1e-07	conserved hypothetical protein [Ricinus communis] >gi|223537481|gb|EEF39107.1| conserved hypothetical protein [Ricinus communis]	--	--	--
Unigene11361_Taxus	1121	319	24.6002	gi|115521213|gb|ABJ09072.1|	323	6e-87	heat shock transcription factor 1 [Medicago sativa] >gi|115521219|gb|ABJ09075.1| heat shock transcription factor 1 [Medicago sativa]	Q84T61	321	5e-87
Unigene11362_Taxus	764	238	26.93	gi|15232817|ref|NP_190333.1|	144	1e-50	HNH endonuclease domain-containing protein [Arabidopsis thaliana] >gi|117168237|gb|ABK32201.1| At3g47490 [Arabidopsis thaliana]	--	--	--
Unigene11363_Taxus	241	7	2.5109	--	--	--	--	--	--	--
Unigene11364_Taxus	217	36	14.3416	gi|115465954|ref|NP_001056576.1|	72.8	2e-12	Os06g0109400 [Oryza sativa (japonica cultivar-group)] >gi|113594616|dbj|BAF18490.1| Os06g0109400 [Oryza sativa Japonica Group]	O14325	70.5	3e-12
Unigene11365_Taxus	1856	998	46.4843	gi|22331378|ref|NP_189431.2|	616	1e-175	DEGP1 (DegP protease 1); serine-type endopeptidase/ serine-type peptidase [Arabidopsis thaliana] >gi|51338737|sp|O22609.2|DEGP1_ARATH RecName: Full=Protease Do-like 1, chloroplastic; Flags: Precursor >gi|11994498|dbj|BAB02539.1| DegP protease precursor [Arabidopsis thaliana] >gi|14517500|gb|AAK62640.1| K16N12.18/K16N12.18 [Arabidopsis thaliana] >gi|21360531|gb|AAM47381.1| At3g27925/K16N12.18 [Ara…	O22609	616	1e-175
Unigene11366_Taxus	407	71	15.0806	--	--	--	--	--	--	--
Unigene11367_Taxus	267	1327	429.648	--	--	--	--	--	--	--
Unigene11368_Taxus	492	17	2.987	gi|270253012|emb|CBI19623.1|	51.2	8e-06	unnamed protein product [Vitis vinifera]	--	--	--
Unigene11369_Taxus	906	106	10.1142	gi|8920582|gb|AAF81304.1|AC027656_21	384	1e-105	Contains similarity to CG10338 gene product from Drosophila melanogaster gb|AE003660 [Arabidopsis thaliana]	Q5R8F6	231	4e-60
Unigene1136_Taxus	542	132	21.0537	gi|115434174|ref|NP_001041845.1|	73.6	2e-12	Os01g0116600 [Oryza sativa (japonica cultivar-group)]	--	--	--
Unigene11370_Taxus	4215	437	8.9627	gi|289540909|gb|ADD09583.1|	318	5e-85	transcription initiation factor [Trifolium repens]	Q54VY3	133	1e-54
Unigene11371_Taxus	1033	308	25.7753	gi|54290856|dbj|BAD61517.1|	92.8	1e-17	lipase class 3 family protein-like [Oryza sativa Japonica Group]	--	--	--
Unigene11372_Taxus	768	55	6.1909	--	--	--	--	--	--	--
Unigene11373_Taxus	431	48	9.6276	--	--	--	--	--	--	--
Unigene11374_Taxus	948	92	8.3894	gi|30679158|ref|NP_567238.2|	114	4e-24	AAA-type ATPase family protein [Arabidopsis thaliana]	--	--	--
Unigene11375_Taxus	1575	367	20.1437	gi|6224712|gb|AAF05914.1|AF180390_1	320	4e-86	non-phototropic hypocotyl 3 [Arabidopsis thaliana]	Q9FMF5	320	1e-86
Unigene11376_Taxus	274	11	3.4705	gi|115463111|ref|NP_001055155.1|	47	3e-12	Os05g0307200 [Oryza sativa (japonica cultivar-group)] >gi|113578706|dbj|BAF17069.1| Os05g0307200 [Oryza sativa Japonica Group]	Q9CAA8	48.9	2e-12
Unigene11377_Taxus	1099	212	16.676	gi|22327066|ref|NP_680221.1|	268	4e-77	RBL11 (RHOMBOID-LIKE PROTEIN 11) [Arabidopsis thaliana] >gi|30102632|gb|AAP21234.1| At5g25752 [Arabidopsis thaliana]	P96617	52.4	6e-06
Unigene11378_Taxus	2205	1251	49.0458	gi|15230686|ref|NP_187915.1|	464	0	ATMRP3; ATPase, coupled to transmembrane movement of substances / chlorophyll catabolite transporter/ glutathione S-conjugate-exporting ATPase [Arabidopsis thaliana] >gi|75335110|sp|Q9LK64.1|AB3C_ARATH RecName: Full=ABC transporter C family member 3; Short=ABC transporter ABCC.3; Short=AtABCC3; AltName: Full=Multidrug resistance-associated protein 3; AltName: Full=Glutathione S-conjugate-transpor…	Q9LK64	464	0
Unigene11379_Taxus	4911	1646	28.9743	gi|115459150|ref|NP_001053175.1|	1767	0	Os04g0492300 [Oryza sativa (japonica cultivar-group)] >gi|38346223|emb|CAE02045.2| OJ990528_30.3 [Oryza sativa (japonica cultivar-group)] >gi|38347455|emb|CAD41360.2| OSJNBa0076N16.24 [Oryza sativa (japonica cultivar-group)] >gi|113564746|dbj|BAF15089.1| Os04g0492300 [Oryza sativa Japonica Group] >gi|116310339|emb|CAH67354.1| OSIGBa0130B08.14 [Oryza sativa (indica cultivar-group)] >gi|116310740|e…	A4IF62	1385	0
Unigene1137_Taxus	1311	122	8.0447	gi|115451261|ref|NP_001049231.1|	233	8e-92	Os03g0191100 [Oryza sativa (japonica cultivar-group)] >gi|108706604|gb|ABF94399.1| Mitochondrial carrier protein, expressed [Oryza sativa (japonica cultivar-group)] >gi|113547702|dbj|BAF11145.1| Os03g0191100 [Oryza sativa Japonica Group]	Q8BMD8	67.8	3e-23
Unigene11380_Taxus	507	102	17.3918	gi|168016294|ref|XP_001760684.1|	55.1	2e-13	gamma tubulin ring complex protein 3 [Physcomitrella patens subsp. patens] >gi|162688044|gb|EDQ74423.1| gamma tubulin ring complex protein 3 [Physcomitrella patens subsp. patens]	--	--	--
Unigene11381_Taxus	2060	392	16.4502	gi|224090105|ref|XP_002308938.1|	362	1e-98	AP2 domain-containing transcription factor [Populus trichocarpa] >gi|222854914|gb|EEE92461.1| AP2 domain-containing transcription factor [Populus trichocarpa]	Q8GWK2	344	2e-93
Unigene11382_Taxus	400	139	30.0406	gi|4337178|gb|AAD18099.1|	192	2e-48	T31J12.5 [Arabidopsis thaliana]	Q8LEK2	192	7e-49
Unigene11383_Taxus	257	15	5.0456	--	--	--	--	--	--	--
Unigene11384_Taxus	385	11	2.4699	gi|75333533|sp|Q9C8S9.1|RH48_ARATH	57	1e-07	RecName: Full=Probable DEAD-box ATP-dependent RNA helicase 48	Q9C8S9	57	3e-08
Unigene11385_Taxus	443	61	11.9036	--	--	--	--	--	--	--
Unigene11386_Taxus	321	21	5.6555	--	--	--	--	--	--	--
Unigene11387_Taxus	2361	925	33.8688	gi|15226877|ref|NP_181047.1|	733	0	UTP--glucose-1-phosphate uridylyltransferase family protein [Arabidopsis thaliana] >gi|6136087|sp|O64765.1|UAP1_ARATH RecName: Full=Probable UDP-N-acetylglucosamine pyrophosphorylase >gi|18087511|gb|AAL58890.1|AF462794_1 At2g35020/F19I3.25 [Arabidopsis thaliana] >gi|56382033|gb|AAV85735.1| At2g35020 [Arabidopsis thaliana]	O64765	733	0
Unigene11388_Taxus	224	2	0.7719	--	--	--	--	--	--	--
Unigene11389_Taxus	1673	167	8.6293	gi|124360728|gb|ABN08705.1|	259	1e-67	DDT; Homeodomain-related [Medicago truncatula]	A2R7P5	61.2	2e-08
Unigene1138_Taxus	638	28	3.7939	gi|162958329|dbj|BAF95588.1|	282	4e-75	AtNEK6 [Arabidopsis thaliana]	Q0WPH8	282	1e-75
Unigene11390_Taxus	1670	781	40.4285	gi|162462365|ref|NP_001104873.1|	558	1e-157	lysine-ketoglutarate reductase/saccharopine dehydrogenase1 [Zea mays] >gi|10716965|gb|AAG21985.1|AF271636_1 lysine ketoglutarate reductase/saccharopine dehydrogenase [Zea mays] >gi|5016095|gb|AAC18622.2| lysine-ketoglutarate reductase/saccharopine dehydrogenase bifunctional enzyme [Zea mays]	Q9SMZ4	512	1e-144
Unigene11391_Taxus	1207	101	7.2338	gi|77553351|gb|ABA96147.1|	398	1e-132	expressed protein [Oryza sativa (japonica cultivar-group)]	P51281	322	2e-96
Unigene11392_Taxus	1576	391	21.4474	gi|115450123|ref|NP_001048662.1|	545	1e-153	Os03g0102400 [Oryza sativa (japonica cultivar-group)] >gi|113547133|dbj|BAF10576.1| Os03g0102400 [Oryza sativa Japonica Group]	O57882	88.2	1e-16
Unigene11393_Taxus	869	75	7.461	--	--	--	--	--	--	--
Unigene11394_Taxus	1253	112	7.7272	gi|222424122|dbj|BAH20020.1|	143	7e-33	AT2G30990 [Arabidopsis thaliana]	--	--	--
Unigene11395_Taxus	243	3	1.0673	--	--	--	--	--	--	--
Unigene11396_Taxus	255	5	1.6951	gi|15240153|ref|NP_201497.1|	56.2	8e-16	prolyl oligopeptidase family protein [Arabidopsis thaliana] >gi|9758541|dbj|BAB08935.1| protease-like [Arabidopsis thaliana]	--	--	--
Unigene11397_Taxus	518	25	4.1722	gi|115455891|ref|NP_001051546.1|	127	8e-29	Os03g0795200 [Oryza sativa (japonica cultivar-group)] >gi|113550017|dbj|BAF13460.1| Os03g0795200 [Oryza sativa Japonica Group]	Q9LIC3	125	1e-28
Unigene11398_Taxus	661	92	12.0321	gi|255676273|dbj|BAH93098.1|	126	4e-28	Os05g0342100 [Oryza sativa Japonica Group]	P20144	83.2	1e-15
Unigene11399_Taxus	1000	182	15.7335	gi|115454833|ref|NP_001051017.1|	68.9	3e-22	Os03g0703400 [Oryza sativa (japonica cultivar-group)] >gi|113549488|dbj|BAF12931.1| Os03g0703400 [Oryza sativa Japonica Group]	Q39008	53.5	2e-06
Unigene1139_Taxus	252	11	3.7735	--	--	--	--	--	--	--
Unigene113_Taxus	565	150	22.9507	gi|17979262|gb|AAL49947.1|	78.2	9e-14	AT5g17280/MKP11_13 [Arabidopsis thaliana] >gi|20147183|gb|AAM10308.1| AT5g17280/MKP11_13 [Arabidopsis thaliana]	B1AS42	56.6	1e-07
Unigene11400_Taxus	1578	269	14.7367	gi|226492519|ref|NP_001151614.1|	283	1e-123	LOC100285248 [Zea mays] >gi|195648100|gb|ACG43518.1| calmodulin-binding protein MPCBP [Zea mays]	Q9ULT0	70.5	1e-20
Unigene11401_Taxus	1751	550	27.1538	gi|224085497|ref|XP_002307595.1|	463	1e-129	f-box family protein [Populus trichocarpa] >gi|222857044|gb|EEE94591.1| f-box family protein [Populus trichocarpa]	Q9M1W7	426	1e-118
Unigene11402_Taxus	746	26	3.0129	gi|115458458|ref|NP_001052829.1|	211	1e-60	Os04g0432200 [Oryza sativa (japonica cultivar-group)] >gi|68611225|emb|CAE03039.3| OSJNBa0084A10.14 [Oryza sativa (japonica cultivar-group)] >gi|116309362|emb|CAH66443.1| B0308C03.3 [Oryza sativa (indica cultivar-group)]	Q6P158	118	4e-26
Unigene11403_Taxus	318	12	3.2622	--	--	--	--	--	--	--
Unigene11404_Taxus	1089	274	21.7508	gi|225435733|ref|XP_002285704.1|	267	3e-70	PREDICTED: similar to TAF7 (TBP-ASSOCIATED FACTOR 7); general RNA polymerase II transcription factor [Vitis vinifera]	Q9D3R9	88.2	9e-17
Unigene11405_Taxus	991	668	58.2715	gi|15228749|ref|NP_191142.1|	147	4e-34	EPC1 (ECTOPICALLY PARTING CELLS); UDP-glucosyltransferase/ transferase, transferring glycosyl groups [Arabidopsis thaliana]	Q9WVL6	80.1	2e-14
Unigene11406_Taxus	1052	111	9.1214	gi|224099325|ref|XP_002311438.1|	248	1e-64	AP2 domain-containing transcription factor [Populus trichocarpa] >gi|222851258|gb|EEE88805.1| AP2 domain-containing transcription factor [Populus trichocarpa]	P82280	228	4e-59
Unigene11407_Taxus	303	258	73.6089	gi|56392765|gb|AAV87151.1|	101	4e-21	methyl jasmonate esterase [Solanum tuberosum]	Q9FVW3	93.6	3e-19
Unigene11408_Taxus	244	15	5.3144	--	--	--	--	--	--	--
Unigene11409_Taxus	3930	1486	32.6874	gi|92870993|gb|ABE80154.1|	799	0	Protein kinase [Medicago truncatula]	Q05609	369	1e-101
Unigene1140_Taxus	255	9	3.0511	--	--	--	--	--	--	--
Unigene11410_Taxus	231	17	6.362	--	--	--	--	--	--	--
Unigene11411_Taxus	277	12	3.745	--	--	--	--	--	--	--
Unigene11412_Taxus	954	471	42.6802	gi|30699390|ref|NP_178028.2|	99	1e-19	SNARE-associated protein-related [Arabidopsis thaliana]	--	--	--
Unigene11413_Taxus	227	54	20.5647	--	--	--	--	--	--	--
Unigene11414_Taxus	251	31	10.6768	gi|21322711|emb|CAD22154.1|	154	5e-37	pherophorin-dz1 protein [Volvox carteri f. nagariensis]	P09789	138	1e-32
Unigene11415_Taxus	223	7	2.7136	--	--	--	--	--	--	--
Unigene11416_Taxus	1221	116	8.2129	gi|115444851|ref|NP_001046205.1|	131	1e-47	Os02g0198200 [Oryza sativa (japonica cultivar-group)] >gi|49388350|dbj|BAD25460.1| calcium-binding EF hand-like protein [Oryza sativa Japonica Group] >gi|113535736|dbj|BAF08119.1| Os02g0198200 [Oryza sativa Japonica Group]	Q52K82	122	2e-40
Unigene11417_Taxus	1868	709	32.8113	gi|18700103|gb|AAL77663.1|	327	6e-88	AT5g10770/T30N20_40 [Arabidopsis thaliana] >gi|24111269|gb|AAN46758.1| At5g10770/T30N20_40 [Arabidopsis thaliana]	Q766C2	222	8e-57
Unigene11418_Taxus	1463	168	9.927	gi|15237230|ref|NP_197706.1|	263	1e-92	HUA2 (ENHANCER OF AG-4 2); transcription factor [Arabidopsis thaliana] >gi|10177804|dbj|BAB11170.1| transcription factor-like protein [Arabidopsis thaliana]	P21997	80.1	4e-14
Unigene11419_Taxus	416	22	4.5718	gi|9954728|gb|AAG09081.1|AC026237_2	96.7	1e-19	Similar to tRNA-splicing endonuclease positive effector SEN1 [Arabidopsis thaliana]	Q86AS0	67.4	3e-11
Unigene1141_Taxus	243	26	9.2495	--	--	--	--	--	--	--
Unigene11420_Taxus	343	7	1.7642	gi|129563703|gb|ABO31100.1|	53.1	2e-06	ovule receptor-like kinase 28 [Solanum chacoense]	Q6R2J8	51.2	2e-06
Unigene11421_Taxus	2193	1363	53.7292	gi|226531368|ref|NP_001148908.1|	473	1e-132	non-imprinted in Prader-Willi/Angelman syndrome region protein 1 [Zea mays] >gi|195623140|gb|ACG33400.1| non-imprinted in Prader-Willi/Angelman syndrome region protein 1 [Zea mays]	Q5RDB8	298	8e-80
Unigene11422_Taxus	238	8	2.9058	--	--	--	--	--	--	--
Unigene11423_Taxus	257	12	4.0365	gi|224010106|ref|XP_002294011.1|	62	3e-09	kinase like protein [Thalassiosira pseudonana CCMP1335] >gi|220970683|gb|EED89020.1| kinase like protein [Thalassiosira pseudonana CCMP1335]	Q9FIJ6	59.3	7e-09
Unigene11424_Taxus	234	6	2.2166	--	--	--	--	--	--	--
Unigene11425_Taxus	1188	898	65.3452	gi|115481472|ref|NP_001064329.1|	55.5	2e-06	Os10g0315400 [Oryza sativa (japonica cultivar-group)] >gi|31431000|gb|AAP52838.1| CUE domain containing protein, expressed [Oryza sativa (japonica cultivar-group)] >gi|113638938|dbj|BAF26243.1| Os10g0315400 [Oryza sativa Japonica Group]	--	--	--
Unigene11426_Taxus	452	49	9.3715	gi|15219831|ref|NP_176882.1|	124	6e-28	CYP735A2; electron carrier/ heme binding / iron ion binding / monooxygenase/ oxygen binding [Arabidopsis thaliana] >gi|44681376|gb|AAS47628.1| At1g67110 [Arabidopsis thaliana] >gi|46931282|gb|AAT06445.1| At1g67110 [Arabidopsis thaliana]	Q05047	106	6e-23
Unigene11427_Taxus	352	17	4.175	--	--	--	--	--	--	--
Unigene11428_Taxus	744	72	8.3659	gi|224081355|ref|XP_002306380.1|	171	1e-41	cytochrome P450 [Populus trichocarpa] >gi|222855829|gb|EEE93376.1| cytochrome P450 [Populus trichocarpa]	O23066	138	3e-32
Unigene11429_Taxus	1372	709	44.6731	gi|30699237|ref|NP_565149.2|	292	1e-77	thylakoid lumenal 29.8 kDa protein [Arabidopsis thaliana] >gi|190358910|sp|O49292.2|PPD4_ARATH RecName: Full=PsbP domain-containing protein 4, chloroplastic; AltName: Full=OEC23-like protein 5; Flags: Precursor	O49292	292	3e-78
Unigene1142_Taxus	1269	327	22.2761	gi|17978954|gb|AAL47442.1|	135	5e-76	At1g12570/T12C24_9 [Arabidopsis thaliana]	P52706	124	2e-64
Unigene11430_Taxus	815	88	9.3342	gi|115458802|ref|NP_001053001.1|	182	6e-45	Os04g0462300 [Oryza sativa (japonica cultivar-group)] >gi|38344973|emb|CAE01536.2| OSJNBa0072F16.18 [Oryza sativa (japonica cultivar-group)] >gi|113564572|dbj|BAF14915.1| Os04g0462300 [Oryza sativa Japonica Group]	--	--	--
Unigene11431_Taxus	990	129	11.2644	gi|76262500|gb|ABA41400.1|	91.7	2e-42	pherophorin-C2 protein precursor [Chlamydomonas reinhardtii]	Q9FPQ6	80.1	1e-36
Unigene11432_Taxus	228	7	2.6541	gi|270255531|emb|CBI37915.1|	37.4	1e-06	unnamed protein product [Vitis vinifera]	--	--	--
Unigene11433_Taxus	1403	98	6.0384	gi|115449217|ref|NP_001048388.1|	149	3e-60	Os02g0796400 [Oryza sativa (japonica cultivar-group)] >gi|47497029|dbj|BAD19082.1| pentatricopeptide (PPR) repeat-containing protein-like [Oryza sativa Japonica Group] >gi|47497238|dbj|BAD19283.1| pentatricopeptide (PPR) repeat-containing protein-like [Oryza sativa Japonica Group] >gi|113537919|dbj|BAF10302.1| Os02g0796400 [Oryza sativa Japonica Group]	O22714	114	3e-57
Unigene11434_Taxus	1094	140	11.0628	--	--	--	--	--	--	--
Unigene11435_Taxus	244	13	4.6058	--	--	--	--	--	--	--
Unigene11436_Taxus	397	37	8.0568	--	--	--	--	--	--	--
Unigene11437_Taxus	1413	179	10.9513	gi|115463923|ref|NP_001055561.1|	157	4e-37	Os05g0417200 [Oryza sativa (japonica cultivar-group)] >gi|113579112|dbj|BAF17475.1| Os05g0417200 [Oryza sativa Japonica Group]	Q75JC9	53.1	5e-06
Unigene11438_Taxus	602	103	14.7909	gi|226531846|ref|NP_001150279.1|	79.7	4e-14	lipoic acid synthetase [Zea mays] >gi|195638054|gb|ACG38495.1| lipoic acid synthetase [Zea mays]	O13642	63.9	7e-10
Unigene11439_Taxus	628	169	23.2638	gi|115440183|ref|NP_001044371.1|	164	9e-40	Os01g0769200 [Oryza sativa (japonica cultivar-group)] >gi|113533902|dbj|BAF06285.1| Os01g0769200 [Oryza sativa Japonica Group]	O65351	53.9	8e-07
Unigene1143_Taxus	495	62	10.8278	--	--	--	--	--	--	--
Unigene11440_Taxus	256	21	7.0914	--	--	--	--	--	--	--
Unigene11441_Taxus	1686	191	9.7933	gi|12054305|emb|CAC20594.1|	249	4e-81	stress responsive gene 6 protein, Srg6 [Hordeum vulgare subsp. vulgare] >gi|12054307|emb|CAC20595.1| stress responsive gene 6, Srg6 [Hordeum vulgare subsp. vulgare]	Q9VKM6	80.9	1e-23
Unigene11442_Taxus	3251	1782	47.3854	gi|109628383|gb|ABG34547.1|	994	0	cellulose synthase-like A1 [Pinus taeda]	Q9LZR3	872	0
Unigene11443_Taxus	586	36	5.3108	--	--	--	--	--	--	--
Unigene11444_Taxus	831	125	13.0036	gi|42569467|ref|NP_180594.2|	112	1e-46	endo/excinuclease amino terminal domain-containing protein [Arabidopsis thaliana] >gi|66792676|gb|AAY56440.1| At2g30350 [Arabidopsis thaliana]	Q5PQP5	64.7	8e-21
Unigene11445_Taxus	1374	260	16.3584	gi|224125738|ref|XP_002319663.1|	412	1e-114	chromatin remodeling complex subunit [Populus trichocarpa] >gi|222858039|gb|EEE95586.1| chromatin remodeling complex subunit [Populus trichocarpa]	Q7YQM3	254	8e-67
Unigene11446_Taxus	274	5	1.5775	--	--	--	--	--	--	--
Unigene11447_Taxus	745	83	9.6311	gi|124359564|gb|ABN05975.1|	199	4e-50	General substrate transporter [Medicago truncatula]	Q0WUU6	192	2e-48
Unigene11448_Taxus	1806	616	29.486	gi|6692100|gb|AAF24565.1|AC007764_7	68.2	6e-10	F22C12.16 [Arabidopsis thaliana] >gi|98961119|gb|ABF59043.1| At1g64080 [Arabidopsis thaliana]	--	--	--
Unigene11449_Taxus	2102	255	10.4872	gi|32250969|gb|AAP74222.1|	184	2e-45	RST1 [Arabidopsis thaliana]	A2AKG8	68.2	2e-10
Unigene1144_Taxus	1705	215	10.901	gi|172072945|ref|YP_001806706.1|	122	4e-56	NADH dehydrogenase subunit 5 [Cryptomeria japonica] >gi|221272281|sp|B1VKJ3.1|NU5C_CRYJA RecName: Full=NAD(P)H-quinone oxidoreductase subunit 5, chloroplastic; AltName: Full=NAD(P)H dehydrogenase subunit 5; AltName: Full=NADH-plastoquinone oxidoreductase subunit 5 >gi|171854964|dbj|BAG16704.1| NADH-plastoquinone oxidoreductase subunit 5 [Cryptomeria japonica] >gi|239794332|dbj|BAH73329.1| NADH-pl…	B1VKJ3	122	1e-56
Unigene11450_Taxus	404	11	2.3538	--	--	--	--	--	--	--
Unigene11451_Taxus	2735	635	20.071	gi|115456027|ref|NP_001051614.1|	498	0	Os03g0803900 [Oryza sativa (japonica cultivar-group)] >gi|113550085|dbj|BAF13528.1| Os03g0803900 [Oryza sativa Japonica Group]	A7XDQ9	486	0
Unigene11452_Taxus	252	4	1.3722	--	--	--	--	--	--	--
Unigene11453_Taxus	1154	163	12.2106	gi|116309460|emb|CAH66532.1|	226	3e-99	H0502B11.12 [Oryza sativa (indica cultivar-group)]	--	--	--
Unigene11454_Taxus	789	574	62.891	gi|260408332|gb|ACX37459.1|	446	1e-124	calcium dependent protein kinase 1 [Gossypium hirsutum]	Q38870	444	1e-124
Unigene11455_Taxus	800	99	10.6979	gi|115449019|ref|NP_001048289.1|	304	1e-81	Os02g0777100 [Oryza sativa (japonica cultivar-group)] >gi|46805515|dbj|BAD16966.1| DENN (AEX-3) domain-containing protein-like [Oryza sativa Japonica Group] >gi|113537820|dbj|BAF10203.1| Os02g0777100 [Oryza sativa Japonica Group]	Q6NXD8	72	4e-12
Unigene11456_Taxus	1189	100	7.2706	--	--	--	--	--	--	--
Unigene11457_Taxus	476	139	25.2442	gi|1220451|gb|AAA91883.1|	200	1e-50	alpha-amylase [Solanum tuberosum]	P17859	194	2e-49
Unigene11458_Taxus	1700	673	34.2231	gi|240256218|ref|NP_001078503.4|	434	1e-120	phospholipase C/ phosphoric diester hydrolase [Arabidopsis thaliana]	Q93XX5	427	1e-119
Unigene11459_Taxus	301	58	16.6577	gi|13925771|gb|AAK49438.1|	103	1e-21	phytase [Glycine max]	Q9SFU3	93.2	4e-19
Unigene1145_Taxus	395	32	7.0034	gi|224106481|ref|XP_002314181.1|	53.9	9e-07	predicted protein [Populus trichocarpa] >gi|222850589|gb|EEE88136.1| predicted protein [Populus trichocarpa]	--	--	--
Unigene11460_Taxus	255	5	1.6951	--	--	--	--	--	--	--
Unigene11461_Taxus	369	115	26.9417	--	--	--	--	--	--	--
Unigene11462_Taxus	414	22	4.5938	gi|190612857|gb|ACE80806.1|	173	1e-42	pentatricopeptide repeat protein [Picea abies]	Q7Y211	167	1e-41
Unigene11463_Taxus	676	147	18.7985	--	--	--	--	--	--	--
Unigene11464_Taxus	1029	79	6.6369	gi|76262500|gb|ABA41400.1|	206	9e-52	pherophorin-C2 protein precursor [Chlamydomonas reinhardtii]	Q9FPQ6	186	2e-46
Unigene11465_Taxus	257	5	1.6819	--	--	--	--	--	--	--
Unigene11466_Taxus	326	70	18.5624	gi|148906686|gb|ABR16492.1|	86.3	2e-16	unknown [Picea sitchensis]	--	--	--
Unigene11467_Taxus	303	9	2.5678	gi|225445074|ref|XP_002280341.1|	50.8	6e-14	PREDICTED: hypothetical protein [Vitis vinifera] >gi|270240761|emb|CBI27990.1| unnamed protein product [Vitis vinifera]	--	--	--
Unigene11468_Taxus	966	540	48.3248	gi|11066213|gb|AAG28503.1|AF196966_1	181	2e-44	hexokinase [Citrus sinensis]	Q9SEK2	177	1e-43
Unigene11469_Taxus	348	33	8.1976	--	--	--	--	--	--	--
Unigene1146_Taxus	2364	942	34.4474	gi|87240364|gb|ABD32222.1|	224	9e-57	Thioredoxin fold [Medicago truncatula]	Q9LH89	167	2e-40
Unigene11470_Taxus	220	10	3.9294	--	--	--	--	--	--	--
Unigene11471_Taxus	336	119	30.6169	--	--	--	--	--	--	--
Unigene11472_Taxus	711	53	6.4441	--	--	--	--	--	--	--
Unigene11473_Taxus	252	21	7.204	gi|255544948|ref|XP_002513535.1|	56.2	2e-07	hypothetical protein RCOM_1578820 [Ricinus communis] >gi|223547443|gb|EEF48938.1| hypothetical protein RCOM_1578820 [Ricinus communis]	--	--	--
Unigene11474_Taxus	1217	212	15.0591	--	--	--	--	--	--	--
Unigene11475_Taxus	424	47	9.5826	--	--	--	--	--	--	--
Unigene11476_Taxus	2629	826	27.1608	gi|92893882|gb|ABE91932.1|	251	6e-65	Nonsense-mediated decay UPF3 [Medicago truncatula]	B0S733	83.6	7e-15
Unigene11477_Taxus	232	9	3.3536	gi|116309680|emb|CAH66728.1|	59.7	3e-18	H0404F02.4 [Oryza sativa (indica cultivar-group)]	Q9FJ25	58.5	2e-17
Unigene11478_Taxus	487	87	15.4434	--	--	--	--	--	--	--
Unigene11479_Taxus	656	296	39.0069	--	--	--	--	--	--	--
Unigene1147_Taxus	575	39	5.8634	gi|40781599|gb|AAR89809.1|	103	2e-21	reductase 1 [Hydrangea macrophylla] >gi|40781603|gb|AAR89811.1| reductase 1 [Hydrangea macrophylla]	Q7G765	84.3	5e-16
Unigene11480_Taxus	201	14	6.0212	--	--	--	--	--	--	--
Unigene11481_Taxus	534	61	9.8751	--	--	--	--	--	--	--
Unigene11482_Taxus	287	16	4.8194	--	--	--	--	--	--	--
Unigene11483_Taxus	1931	428	19.1609	gi|115441485|ref|NP_001045022.1|	123	2e-26	Os01g0885200 [Oryza sativa (japonica cultivar-group)] >gi|113534553|dbj|BAF06936.1| Os01g0885200 [Oryza sativa Japonica Group]	--	--	--
Unigene11484_Taxus	244	22	7.7945	gi|226498772|ref|NP_001149413.1|	59.3	2e-08	mitochondrial carrier protein [Zea mays]	--	--	--
Unigene11485_Taxus	246	8	2.8113	--	--	--	--	--	--	--
Unigene11486_Taxus	234	17	6.2804	gi|224081875|ref|XP_002306511.1|	57	1e-07	endoplasmic reticulum [ER]-type calcium ATPase [Populus trichocarpa] >gi|222855960|gb|EEE93507.1| endoplasmic reticulum [ER]-type calcium ATPase [Populus trichocarpa]	--	--	--
Unigene11487_Taxus	952	316	28.6948	gi|16323109|gb|AAL15289.1|	147	3e-34	AT3g12650/T2E22_103 [Arabidopsis thaliana] >gi|21360415|gb|AAM47323.1| AT3g12650/T2E22_103 [Arabidopsis thaliana]	--	--	--
Unigene11488_Taxus	243	10	3.5575	gi|15787889|gb|AAL07536.1|	65.9	2e-10	resistance gene analog NBS1 [Helianthus annuus]	Q40392	53.1	5e-07
Unigene11489_Taxus	588	298	43.8119	gi|15218872|ref|NP_176178.1|	68.9	6e-11	ATGSTU16 (GLUTATHIONE S-TRANSFERASE TAU 16); glutathione transferase [Arabidopsis thaliana] >gi|5080803|gb|AAD39312.1|AC007258_1 Similar to glutathione transferase [Arabidopsis thaliana] >gi|8778752|gb|AAF79760.1|AC009317_19 T30E16.30 [Arabidopsis thaliana] >gi|48310666|gb|AAT41863.1| At1g59700 [Arabidopsis thaliana]	--	--	--
Unigene1148_Taxus	537	28	4.5075	gi|13937163|gb|AAK50075.1|AF372935_1	52.8	4e-06	At1g55160/T7N22.11 [Arabidopsis thaliana] >gi|22137148|gb|AAM91419.1| At1g55160/T7N22.11 [Arabidopsis thaliana]	--	--	--
Unigene11490_Taxus	1164	412	30.5983	gi|115457900|ref|NP_001052550.1|	290	3e-77	Os04g0360500 [Oryza sativa (japonica cultivar-group)] >gi|32487608|emb|CAE05914.1| OSJNBa0034E24.8 [Oryza sativa (japonica cultivar-group)] >gi|116309518|emb|CAH66583.1| OSIGBa0111E13.1 [Oryza sativa (indica cultivar-group)] >gi|116309597|emb|CAH66654.1| OSIGBa0113I06.5 [Oryza sativa (indica cultivar-group)]	--	--	--
Unigene11491_Taxus	363	26	6.1918	gi|168012526|ref|XP_001758953.1|	50.8	4e-13	Arf6/ArfB-family small GTPase-like protein [Physcomitrella patens subsp. patens] >gi|162690090|gb|EDQ76459.1| Arf6/ArfB-family small GTPase-like protein [Physcomitrella patens subsp. patens]	P49076	46.6	4e-12
Unigene11492_Taxus	948	105	9.5749	gi|188038609|gb|ACD46918.1|	120	2e-55	ribosomal protein L16 [Ginkgo biloba]	Q95747	132	4e-30
Unigene11493_Taxus	308	21	5.8942	--	--	--	--	--	--	--
Unigene11494_Taxus	1129	94	7.1976	gi|21655203|gb|AAM28916.1|	180	3e-66	NBS/LRR [Pinus taeda]	Q9SZA7	117	2e-46
Unigene11495_Taxus	524	121	19.9622	gi|79386788|ref|NP_186881.2|	237	1e-61	RNA binding / tRNA (guanine-N2-)-methyltransferase [Arabidopsis thaliana] >gi|209572713|sp|Q9SRU7.3|TRM2_ARATH RecName: Full=Probable N(2),N(2)-dimethylguanosine tRNA methyltransferase 2; AltName: Full=tRNA(guanine-26,N(2)-N(2)) methyltransferase 2; AltName: Full=tRNA 2,2-dimethylguanosine-26 methyltransferase 2; AltName: Full=tRNA(m(2,2)G26)dimethyltransferase 2	Q9SRU7	237	3e-62
Unigene11496_Taxus	896	49	4.7276	gi|115461100|ref|NP_001054150.1|	115	9e-34	Os04g0661700 [Oryza sativa (japonica cultivar-group)] >gi|113565721|dbj|BAF16064.1| Os04g0661700 [Oryza sativa Japonica Group]	--	--	--
Unigene11497_Taxus	420	18	3.7049	gi|168033886|ref|XP_001769445.1|	85.1	8e-17	predicted protein [Physcomitrella patens subsp. patens] >gi|162679365|gb|EDQ65814.1| predicted protein [Physcomitrella patens subsp. patens]	--	--	--
Unigene11498_Taxus	433	229	45.7195	--	--	--	--	--	--	--
Unigene11499_Taxus	420	43	8.8506	--	--	--	--	--	--	--
Unigene1149_Taxus	232	6	2.2357	--	--	--	--	--	--	--
Unigene114_Taxus	368	99	23.2563	gi|115467116|ref|NP_001057157.1|	103	1e-21	Os06g0218600 [Oryza sativa (japonica cultivar-group)] >gi|113595197|dbj|BAF19071.1| Os06g0218600 [Oryza sativa Japonica Group]	Q41001	103	4e-22
Unigene11500_Taxus	775	178	19.8551	--	--	--	--	--	--	--
Unigene11501_Taxus	474	41	7.4775	gi|115471557|ref|NP_001059377.1|	178	3e-44	Os07g0281800 [Oryza sativa (japonica cultivar-group)] >gi|113610913|dbj|BAF21291.1| Os07g0281800 [Oryza sativa Japonica Group]	Q6Z351	178	1e-44
Unigene11502_Taxus	342	14	3.5388	--	--	--	--	--	--	--
Unigene11503_Taxus	207	13	5.4291	--	--	--	--	--	--	--
Unigene11504_Taxus	501	60	10.353	--	--	--	--	--	--	--
Unigene11505_Taxus	577	220	32.961	--	--	--	--	--	--	--
Unigene11506_Taxus	1176	1565	115.043	gi|5706704|gb|AAD47346.1|AF112440_1	232	1e-59	ribosomal protein S26 [Pisum sativum]	Q8LPJ7	213	3e-54
Unigene11507_Taxus	547	54	8.5341	--	--	--	--	--	--	--
Unigene11508_Taxus	1146	123	9.2784	--	--	--	--	--	--	--
Unigene11509_Taxus	298	15	4.3514	--	--	--	--	--	--	--
Unigene1150_Taxus	570	12	1.82	--	--	--	--	--	--	--
Unigene11510_Taxus	719	35	4.2082	gi|224482657|gb|ACN50185.1|	112	4e-28	syntaxin-71 [Annona cherimola]	Q9SF29	105	9e-27
Unigene11511_Taxus	625	306	42.3248	--	--	--	--	--	--	--
Unigene11512_Taxus	298	52	15.0848	--	--	--	--	--	--	--
Unigene11513_Taxus	526	35	5.7522	--	--	--	--	--	--	--
Unigene11514_Taxus	702	110	13.5459	gi|115485703|ref|NP_001067995.1|	197	1e-49	Os11g0525800 [Oryza sativa (japonica cultivar-group)] >gi|77551212|gb|ABA94009.1| acetyltransferase, GNAT family protein, expressed [Oryza sativa (japonica cultivar-group)] >gi|113645217|dbj|BAF28358.1| Os11g0525800 [Oryza sativa Japonica Group]	Q147X3	129	1e-40
Unigene11515_Taxus	584	45	6.6612	gi|9755453|gb|AAF98214.1|AC007152_10	95.1	8e-19	Hypothetical protein [Arabidopsis thaliana]	--	--	--
Unigene11516_Taxus	626	55	7.5952	gi|15451126|gb|AAK96834.1|	173	2e-56	Unknown protein [Arabidopsis thaliana]	--	--	--
Unigene11517_Taxus	2240	463	17.8684	gi|224094296|ref|XP_002310129.1|	373	1e-102	SET domain protein [Populus trichocarpa] >gi|222853032|gb|EEE90579.1| SET domain protein [Populus trichocarpa]	Q8S4P6	345	1e-93
Unigene11518_Taxus	255	7	2.3731	gi|115485019|ref|NP_001067653.1|	44.7	2e-06	Os11g0264500 [Oryza sativa (japonica cultivar-group)] >gi|113644875|dbj|BAF28016.1| Os11g0264500 [Oryza sativa Japonica Group]	--	--	--
Unigene11519_Taxus	1172	56	4.1306	gi|46396756|sp|P93194.2|RPK1_IPONI	103	2e-61	RecName: Full=Receptor-like protein kinase; Flags: Precursor >gi|14495542|gb|AAB36558.2| receptor-like protein kinase INRPK1 [Ipomoea nil]	P93194	103	6e-62
Unigene1151_Taxus	340	64	16.2725	gi|9931567|gb|AAG02215.1|AF291667_1	51.6	5e-06	class III peroxidase PSYP1 [Pinus sylvestris]	--	--	--
Unigene11520_Taxus	245	28	9.8797	--	--	--	--	--	--	--
Unigene11521_Taxus	1676	575	29.6584	gi|75266736|sp|Q9SZ53.1|P2C60_ARATH	528	1e-148	RecName: Full=Probable protein phosphatase 2C 60; Short=AtPP2C60 >gi|4584525|emb|CAB40756.1| protein phosphatase 2C-like protein [Arabidopsis thaliana] >gi|7270089|emb|CAB79904.1| protein phosphatase 2C-like protein [Arabidopsis thaliana] >gi|16209698|gb|AAL14406.1| AT4g31860/F11C18_60 [Arabidopsis thaliana] >gi|21360433|gb|AAM47332.1| AT4g31860/F11C18_60 [Arabidopsis thaliana]	Q9SZ53	528	1e-149
Unigene11522_Taxus	1570	382	21.0338	gi|34809533|gb|AAQ82687.1|	65.5	3e-09	Epa5p [Candida glabrata]	Q75JC9	71.6	1e-11
Unigene11523_Taxus	320	48	12.9672	--	--	--	--	--	--	--
Unigene11524_Taxus	1083	287	22.909	gi|115477262|ref|NP_001062227.1|	229	6e-59	Os08g0513700 [Oryza sativa (japonica cultivar-group)]	Q6Z8M8	229	2e-59
Unigene11525_Taxus	230	10	3.7586	gi|147886439|gb|ABQ52428.1|	110	1e-23	boron transporter [Citrus macrophylla]	Q9M1P7	100	2e-21
Unigene11526_Taxus	238	11	3.9955	--	--	--	--	--	--	--
Unigene11527_Taxus	272	10	3.1782	gi|15238833|ref|NP_200187.1|	134	5e-31	MLO11 (MILDEW RESISTANCE LOCUS O 11); calmodulin binding [Arabidopsis thaliana] >gi|79330795|ref|NP_001032070.1| MLO11 (MILDEW RESISTANCE LOCUS O 11); calmodulin binding [Arabidopsis thaliana] >gi|33112394|sp|Q9FI00.1|MLO11_ARATH RecName: Full=MLO-like protein 11; Short=AtMlo11 >gi|14091592|gb|AAK53804.1|AF369572_1 membrane protein Mlo11 [Arabidopsis thaliana] >gi|15982791|gb|AAL09743.1| AT5g5376…	Q9FI00	134	2e-31
Unigene11528_Taxus	1661	215	11.1898	gi|115451397|ref|NP_001049299.1|	175	8e-68	Os03g0201700 [Oryza sativa (japonica cultivar-group)] >gi|108706711|gb|ABF94506.1| expressed protein [Oryza sativa (japonica cultivar-group)] >gi|113547770|dbj|BAF11213.1| Os03g0201700 [Oryza sativa Japonica Group]	--	--	--
Unigene11529_Taxus	303	7	1.9971	--	--	--	--	--	--	--
Unigene1152_Taxus	1563	1033	57.134	gi|28380205|sp|Q9AXM6.1|T10H_TAXCU	664	0	RecName: Full=Taxane 10-beta-hydroxylase; AltName: Full=5-alpha-taxadienol-10-beta-hydroxylase; AltName: Full=Cytochrome P450 725A1 >gi|12656592|gb|AAK00946.1|AF318211_1 5-alpha-taxadienol-10-beta-hydroxylase [Taxus cuspidata]	Q9AXM6	664	0
Unigene11530_Taxus	268	25	8.0642	--	--	--	--	--	--	--
Unigene11531_Taxus	350	14	3.4579	gi|255564651|ref|XP_002523320.1|	38.1	2e-06	nucleotide binding protein, putative [Ricinus communis] >gi|223537408|gb|EEF39036.1| nucleotide binding protein, putative [Ricinus communis]	--	--	--
Unigene11532_Taxus	1580	434	23.7458	gi|19113482|ref|NP_596690.1|	71.2	6e-11	sequence orphan [Schizosaccharomyces pombe] >gi|74582853|sp|O94317.1|YH5D_SCHPO RecName: Full=Uncharacterized serine-rich protein C215.13; Flags: Precursor >gi|3873550|emb|CAA22127.1| sequence orphan [Schizosaccharomyces pombe]	Q75JC9	77.4	3e-13
Unigene11533_Taxus	360	18	4.3224	--	--	--	--	--	--	--
Unigene11534_Taxus	567	82	12.5021	gi|224713624|gb|ACN62085.1|	351	4e-96	phenylpropanoyltransferase [Taxus sumatrana]	Q9FPW3	212	1e-54
Unigene11535_Taxus	882	120	11.7616	gi|223452542|gb|ACM89598.1|	102	4e-32	leucine-rich repeat protein [Glycine max]	Q8L899	89.7	2e-17
Unigene11536_Taxus	3873	1197	26.7178	gi|164605535|dbj|BAF98601.1|	1085	0	CM0545.290.nc [Lotus japonicus]	Q84WU2	1055	0
Unigene11537_Taxus	1933	469	20.9746	gi|255079166|ref|XP_002503163.1|	607	1e-172	dead-box ATP-dependent RNA helicase [Micromonas sp. RCC299] >gi|226518429|gb|ACO64421.1| dead-box ATP-dependent RNA helicase [Micromonas sp. RCC299]	Q9CWX9	604	1e-172
Unigene11538_Taxus	311	35	9.7288	gi|159465681|ref|XP_001691051.1|	94	8e-19	ubiquitin conjugating enzyme family protein [Chlamydomonas reinhardtii] >gi|158279737|gb|EDP05497.1| ubiquitin conjugating enzyme family protein [Chlamydomonas reinhardtii]	Q11076	116	4e-26
Unigene11539_Taxus	224	4	1.5437	--	--	--	--	--	--	--
Unigene1153_Taxus	244	3	1.0629	--	--	--	--	--	--	--
Unigene11540_Taxus	678	64	8.1603	gi|226531101|ref|NP_001152654.1|	182	7e-45	peptide chain release factor 2 [Zea mays] >gi|195658609|gb|ACG48772.1| peptide chain release factor 2 [Zea mays]	B7K0A6	144	5e-34
Unigene11541_Taxus	1261	323	22.1432	gi|226494740|ref|NP_001150217.1|	384	1e-105	aminotransferase, class IV family protein [Zea mays] >gi|195637620|gb|ACG38278.1| aminotransferase, class IV family protein [Zea mays]	Q9ASR4	367	1e-101
Unigene11542_Taxus	2512	936	32.2114	gi|225450356|ref|XP_002274890.1|	667	0	PREDICTED: similar to protein kinase family protein [Vitis vinifera]	Q54VV7	223	5e-57
Unigene11543_Taxus	508	42	7.1473	gi|115472117|ref|NP_001059657.1|	189	3e-56	Os07g0485400 [Oryza sativa (japonica cultivar-group)]	O48593	186	2e-55
Unigene11544_Taxus	397	17	3.7018	--	--	--	--	--	--	--
Unigene11545_Taxus	227	5	1.9041	--	--	--	--	--	--	--
Unigene11546_Taxus	326	50	13.2589	gi|148906686|gb|ABR16492.1|	82.8	2e-15	unknown [Picea sitchensis]	--	--	--
Unigene11547_Taxus	1259	128	8.789	gi|75100616|sp|O82318.1|Y2579_ARATH	262	1e-107	RecName: Full=Probably inactive leucine-rich repeat receptor-like protein kinase At2g25790; Flags: Precursor >gi|224589523|gb|ACN59295.1| leucine-rich repeat receptor-like protein kinase [Arabidopsis thaliana]	Q9SYQ8	187	3e-70
Unigene11548_Taxus	328	9	2.372	gi|255677906|dbj|BAF21991.2|	92.8	4e-34	Os07g0575100 [Oryza sativa Japonica Group]	Q8BKC5	52.8	2e-15
Unigene11549_Taxus	414	40	8.3524	--	--	--	--	--	--	--
Unigene1154_Taxus	4515	1566	29.9839	gi|186512050|ref|NP_193684.3|	1050	0	protein binding [Arabidopsis thaliana]	Q9VLC0	245	2e-63
Unigene11550_Taxus	659	53	6.9525	gi|255676726|dbj|BAF18751.2|	151	1e-35	Os06g0152500 [Oryza sativa Japonica Group]	Q3EDF8	137	6e-32
Unigene11551_Taxus	471	25	4.5885	gi|62132411|gb|AAX68988.1|	76.3	9e-26	arabinogalactan protein [Pinus nelsonii]	Q9S740	41.2	1e-09
Unigene11552_Taxus	1564	767	42.3948	gi|224131658|ref|XP_002321145.1|	398	1e-109	ebs-bah-phd domain-containing protein [Populus trichocarpa] >gi|222861918|gb|EEE99460.1| ebs-bah-phd domain-containing protein [Populus trichocarpa]	Q90941	65.9	8e-10
Unigene11553_Taxus	642	117	15.7545	gi|224131284|ref|XP_002321046.1|	55.1	1e-06	histidine phosphotransfer protein [Populus trichocarpa] >gi|222861819|gb|EEE99361.1| histidine phosphotransfer protein [Populus trichocarpa]	--	--	--
Unigene11554_Taxus	256	4	1.3507	gi|168027824|ref|XP_001766429.1|	66.6	1e-15	SNF2 family DNA-dependent ATPase [Physcomitrella patens subsp. patens] >gi|162682338|gb|EDQ68757.1| SNF2 family DNA-dependent ATPase [Physcomitrella patens subsp. patens]	--	--	--
Unigene11555_Taxus	262	10	3.2995	gi|116308960|emb|CAH66085.1|	59.7	2e-08	H0209A05.2 [Oryza sativa (indica cultivar-group)]	--	--	--
Unigene11556_Taxus	406	77	16.3953	gi|224120972|ref|XP_002318465.1|	82.8	2e-15	SAUR family protein [Populus trichocarpa] >gi|222859138|gb|EEE96685.1| SAUR family protein [Populus trichocarpa]	P33082	63.2	5e-10
Unigene11557_Taxus	368	22	5.1681	--	--	--	--	--	--	--
Unigene11558_Taxus	259	9	3.004	--	--	--	--	--	--	--
Unigene11559_Taxus	1422	190	11.5507	gi|15230391|ref|NP_190676.1|	59.7	2e-07	dehydration-responsive protein-related [Arabidopsis thaliana]	P10354	58.2	1e-07
Unigene1155_Taxus	417	122	25.2917	--	--	--	--	--	--	--
Unigene11560_Taxus	867	82	8.1761	gi|115453445|ref|NP_001050323.1|	368	1e-114	Os03g0403100 [Oryza sativa (japonica cultivar-group)] >gi|113548794|dbj|BAF12237.1| Os03g0403100 [Oryza sativa Japonica Group]	P59470	288	4e-87
Unigene11561_Taxus	259	3	1.0013	gi|32441248|gb|AAP81799.1|	64.3	2e-22	At5g39940 [Arabidopsis thaliana]	--	--	--
Unigene11562_Taxus	1163	506	37.6118	gi|255678398|dbj|BAF23572.2|	163	8e-39	Os08g0369700 [Oryza sativa Japonica Group]	Q8LCY2	151	1e-35
Unigene11563_Taxus	580	74	11.0295	gi|15228302|ref|NP_188294.1|	110	2e-23	ATL2; protein binding / zinc ion binding [Arabidopsis thaliana] >gi|68565202|sp|Q8L9T5.2|ATL3F_ARATH RecName: Full=RING-H2 finger protein ATL3F; AltName: Full=RING-H2 finger protein ATL2 >gi|11994627|dbj|BAB02764.1| RING zinc finger protein-like [Arabidopsis thaliana] >gi|17065578|gb|AAL32943.1| RING zinc finger protein-like [Arabidopsis thaliana] >gi|20148585|gb|AAM10183.1| RING zinc finger prot…	Q8L9T5	110	6e-24
Unigene11564_Taxus	571	91	13.7771	gi|15235508|ref|NP_192191.1|	79.3	4e-14	pentatricopeptide (PPR) repeat-containing protein [Arabidopsis thaliana] >gi|75213327|sp|Q9SY07.1|PP302_ARATH RecName: Full=Pentatricopeptide repeat-containing protein At4g02820, mitochondrial; Flags: Precursor	Q9SY07	79.3	1e-14
Unigene11565_Taxus	1040	269	22.36	--	--	--	--	--	--	--
Unigene11566_Taxus	254	25	8.5086	--	--	--	--	--	--	--
Unigene11567_Taxus	947	126	11.502	gi|18413398|ref|NP_567369.1|	273	3e-72	F-box family protein [Arabidopsis thaliana] >gi|30681602|ref|NP_849357.1| F-box family protein [Arabidopsis thaliana] >gi|75249436|sp|Q93YV9.1|SKIP8_ARATH RecName: Full=F-box protein SKIP8; AltName: Full=SKP1-interacting partner 8	Q93YV9	273	1e-72
Unigene11568_Taxus	1680	168	8.6448	gi|2832644|emb|CAA16719.1|	109	2e-22	teosinte branched1 - like protein [Arabidopsis thaliana] >gi|7268632|emb|CAB78841.1| teosinte branched1-like protein [Arabidopsis thaliana]	Q93V43	109	5e-23
Unigene11569_Taxus	597	120	17.3764	gi|115468306|ref|NP_001057752.1|	81.3	1e-14	Os06g0523300 [Oryza sativa (japonica cultivar-group)] >gi|113595792|dbj|BAF19666.1| Os06g0523300 [Oryza sativa Japonica Group]	--	--	--
Unigene1156_Taxus	1472	338	19.8501	gi|115449027|ref|NP_001048293.1|	367	1e-100	Os02g0778200 [Oryza sativa (japonica cultivar-group)] >gi|113537824|dbj|BAF10207.1| Os02g0778200 [Oryza sativa Japonica Group]	Q8DGI7	213	4e-54
Unigene11570_Taxus	2694	445	14.2796	gi|42566850|ref|NP_193292.3|	603	0	MAA3 (MAGATAMA 3) [Arabidopsis thaliana] >gi|209574484|gb|ACI63222.1| MAA3 [Arabidopsis thaliana]	Q86AS0	335	1e-100
Unigene11571_Taxus	503	322	55.3403	--	--	--	--	--	--	--
Unigene11572_Taxus	506	43	7.3463	gi|115480599|ref|NP_001063893.1|	81.3	1e-32	Os09g0555600 [Oryza sativa (japonica cultivar-group)] >gi|113632126|dbj|BAF25807.1| Os09g0555600 [Oryza sativa Japonica Group]	Q56YP2	44.3	4e-11
Unigene11573_Taxus	5698	1165	17.6749	gi|199434184|emb|CAR65968.1|	129	1e-27	DEHA2G13816p [Debaryomyces hansenii]	Q6GQJ2	133	2e-29
Unigene11574_Taxus	249	9	3.1246	--	--	--	--	--	--	--
Unigene11575_Taxus	1574	681	37.4021	gi|18411903|ref|NP_565177.1|	132	2e-29	VQ motif-containing protein [Arabidopsis thaliana] >gi|8052537|gb|AAF71801.1|AC013430_10 F3F9.15 [Arabidopsis thaliana]	Q84ZL0	74.7	2e-12
Unigene11576_Taxus	1221	241	17.063	gi|115482812|ref|NP_001064999.1|	171	3e-83	Os10g0503600 [Oryza sativa (japonica cultivar-group)] >gi|113639608|dbj|BAF26913.1| Os10g0503600 [Oryza sativa Japonica Group]	--	--	--
Unigene11577_Taxus	510	98	16.6115	gi|115489492|ref|NP_001067233.1|	141	5e-33	Os12g0607100 [Oryza sativa (japonica cultivar-group)] >gi|113649740|dbj|BAF30252.1| Os12g0607100 [Oryza sativa Japonica Group]	Q54XD8	110	3e-24
Unigene11578_Taxus	760	67	7.621	gi|143455388|sp|Q0D622.2|RH32_ORYSJ	71.2	1e-15	RecName: Full=DEAD-box ATP-dependent RNA helicase 32	Q0D622	71.2	4e-16
Unigene11579_Taxus	1011	49	4.1898	gi|168014639|ref|XP_001759859.1|	88.2	3e-16	predicted protein [Physcomitrella patens subsp. patens] >gi|162688989|gb|EDQ75363.1| predicted protein [Physcomitrella patens subsp. patens]	--	--	--
Unigene1157_Taxus	595	17	2.4699	gi|18416582|ref|NP_568249.1|	115	2e-46	MYB3R-4 (myb domain protein 3R-4); DNA binding / transcription coactivator/ transcription factor [Arabidopsis thaliana] >gi|41619520|gb|AAS10120.1| MYB transcription factor [Arabidopsis thaliana]	Q9S7G7	113	9e-47
Unigene11580_Taxus	1453	638	37.9585	gi|195611436|gb|ACG27548.1|	407	1e-112	heparanase-like protein 2 precursor [Zea mays]	Q9FF10	384	1e-106
Unigene11581_Taxus	294	18	5.2927	gi|270234641|emb|CBI23243.1|	53.5	1e-06	unnamed protein product [Vitis vinifera]	--	--	--
Unigene11582_Taxus	229	9	3.3975	gi|30684177|ref|NP_193511.2|	81.3	5e-15	damaged DNA binding / exodeoxyribonuclease III [Arabidopsis thaliana] >gi|38603844|gb|AAR24667.1| At4g17760 [Arabidopsis thaliana] >gi|46016025|emb|CAE55213.1| Rad1-like protein [Arabidopsis thaliana]	--	--	--
Unigene11583_Taxus	243	15	5.3363	--	--	--	--	--	--	--
Unigene11584_Taxus	254	2	0.6807	--	--	--	--	--	--	--
Unigene11585_Taxus	367	30	7.0666	gi|22328255|ref|NP_192188.2|	75.5	3e-13	GTP-binding family protein [Arabidopsis thaliana]	--	--	--
Unigene11586_Taxus	455	73	13.8696	--	--	--	--	--	--	--
Unigene11587_Taxus	229	13	4.9075	gi|115473675|ref|NP_001060436.1|	63.9	2e-18	Os07g0642400 [Oryza sativa (japonica cultivar-group)] >gi|113611972|dbj|BAF22350.1| Os07g0642400 [Oryza sativa Japonica Group]	Q9FF61	52.8	4e-14
Unigene11588_Taxus	593	105	15.3069	gi|15217779|ref|NP_174118.1|	153	2e-36	NTF2B (NUCLEAR TRANSPORT FACTOR 2B); Ran GTPase binding / protein transporter [Arabidopsis thaliana] >gi|15214148|sp|Q9C7F5.1|NTF2_ARATH RecName: Full=Nuclear transport factor 2; Short=NTF-2 >gi|98961065|gb|ABF59016.1| At1g27970 [Arabidopsis thaliana]	Q9C7F5	153	6e-37
Unigene11589_Taxus	212	31	12.6409	--	--	--	--	--	--	--
Unigene1158_Taxus	434	19	3.7846	--	--	--	--	--	--	--
Unigene11590_Taxus	249	4	1.3887	gi|225438381|ref|XP_002274423.1|	67.4	8e-11	PREDICTED: hypothetical protein [Vitis vinifera] >gi|270232281|emb|CBI21604.1| unnamed protein product [Vitis vinifera]	--	--	--
Unigene11591_Taxus	279	13	4.028	--	--	--	--	--	--	--
Unigene11592_Taxus	505	20	3.4237	gi|42566982|ref|NP_193747.2|	124	2e-30	GSO1 (GASSHO1); ATP binding / protein binding / protein kinase/ protein serine/threonine kinase/ protein tyrosine kinase [Arabidopsis thaliana] >gi|263430760|sp|C0LGQ5.1|GSO1_ARATH RecName: Full=LRR receptor-like serine/threonine-protein kinase GSO1; AltName: Full=Protein GASSHO 1; Flags: Precursor >gi|224589614|gb|ACN59340.1| leucine-rich repeat receptor-like protein kinase [Arabidopsis thaliana]	P93194	106	2e-26
Unigene11593_Taxus	394	12	2.6329	--	--	--	--	--	--	--
Unigene11594_Taxus	2113	578	23.6473	gi|1711512|sp|P49972.1|SR542_SOLLC	627	0	RecName: Full=Signal recognition particle 54 kDa protein 2; Short=SRP54 >gi|556902|emb|CAA84288.1| 54-kD signal recognition particle (SRP) specific protein [Solanum lycopersicum]	P49972	627	0
Unigene11595_Taxus	254	5	1.7017	--	--	--	--	--	--	--
Unigene11596_Taxus	976	157	13.906	gi|261411636|gb|ACX81221.1|	253	1e-104	Ras-related GTP binding protein [Lepidium latifolium]	P54765	275	2e-89
Unigene11597_Taxus	275	91	28.6063	--	--	--	--	--	--	--
Unigene11598_Taxus	925	59	5.514	gi|168051734|ref|XP_001778308.1|	98.6	5e-23	predicted protein [Physcomitrella patens subsp. patens] >gi|162670285|gb|EDQ56856.1| predicted protein [Physcomitrella patens subsp. patens]	--	--	--
Unigene11599_Taxus	1448	978	58.388	gi|8118507|gb|AAF73006.1|AF262997_1	609	1e-173	NADP-dependent malic protein [Ricinus communis]	P12628	600	1e-171
Unigene1159_Taxus	216	6	2.4013	gi|9295277|gb|AAF86908.1|AF223360_1	66.2	1e-19	glucose-6P/phosphate translocator precursor [Mesembryanthemum crystallinum]	Q9M5A9	65.1	5e-19
Unigene115_Taxus	525	86	14.161	--	--	--	--	--	--	--
Unigene11600_Taxus	960	135	12.1567	gi|15232791|ref|NP_190323.1|	199	1e-56	cytidine/deoxycytidylate deaminase family protein [Arabidopsis thaliana]	Q55158	147	2e-37
Unigene11601_Taxus	2598	1389	46.2186	gi|115468896|ref|NP_001058047.1|	568	1e-160	Os06g0609700 [Oryza sativa (japonica cultivar-group)] >gi|113596087|dbj|BAF19961.1| Os06g0609700 [Oryza sativa Japonica Group]	P54567	66.2	1e-09
Unigene11602_Taxus	255	4	1.356	gi|224141703|ref|XP_002324204.1|	63.2	2e-09	dicer-like protein [Populus trichocarpa] >gi|222865638|gb|EEF02769.1| dicer-like protein [Populus trichocarpa]	Q5N870	56.2	6e-08
Unigene11603_Taxus	664	62	8.0719	gi|115435314|ref|NP_001042415.1|	84.7	1e-15	Os01g0218900 [Oryza sativa (japonica cultivar-group)]	Q9M364	84.3	6e-16
Unigene11604_Taxus	392	35	7.7185	gi|42570847|ref|NP_973497.1|	59.7	3e-19	folic acid binding / transferase [Arabidopsis thaliana]	--	--	--
Unigene11605_Taxus	1766	149	7.2937	gi|168025390|ref|XP_001765217.1|	186	5e-76	SNF2 superfamily chromatin remodeling protein [Physcomitrella patens subsp. patens] >gi|162683536|gb|EDQ69945.1| SNF2 superfamily chromatin remodeling protein [Physcomitrella patens subsp. patens]	O14981	115	1e-24
Unigene11606_Taxus	564	24	3.6786	gi|115458440|ref|NP_001052820.1|	122	4e-36	Os04g0430700 [Oryza sativa (japonica cultivar-group)] >gi|113564391|dbj|BAF14734.1| Os04g0430700 [Oryza sativa Japonica Group]	O65351	105	2e-31
Unigene11607_Taxus	436	10	1.9827	--	--	--	--	--	--	--
Unigene11608_Taxus	868	90	8.9635	gi|42566208|ref|NP_567191.2|	107	3e-22	iqd17 (IQ-domain 17); calmodulin binding [Arabidopsis thaliana]	Q9SF32	70.9	1e-11
Unigene11609_Taxus	1073	84	6.7676	gi|68487120|ref|XP_712563.1|	53.9	6e-06	flocculin-like protein [Candida albicans SC5314] >gi|46433961|gb|EAK93385.1| flocculin-like protein [Candida albicans SC5314]	Q54YV1	52	7e-06
Unigene1160_Taxus	214	4	1.6158	gi|15233259|ref|NP_188222.1|	46.2	1e-08	pentatricopeptide (PPR) repeat-containing protein [Arabidopsis thaliana] >gi|75274469|sp|Q9LW84.1|PP236_ARATH RecName: Full=Pentatricopeptide repeat-containing protein At3g16010	Q9LW84	46.2	4e-09
Unigene11610_Taxus	682	66	8.3659	--	--	--	--	--	--	--
Unigene11611_Taxus	536	13	2.0967	--	--	--	--	--	--	--
Unigene11612_Taxus	412	143	30.0049	--	--	--	--	--	--	--
Unigene11613_Taxus	462	29	5.4264	--	--	--	--	--	--	--
Unigene11614_Taxus	243	11	3.9133	--	--	--	--	--	--	--
Unigene11615_Taxus	284	12	3.6527	gi|115478168|ref|NP_001062679.1|	73.9	1e-13	Os09g0250700 [Oryza sativa (japonica cultivar-group)] >gi|47848636|dbj|BAD22484.1| ABC1 family protein-like [Oryza sativa Japonica Group] >gi|113630912|dbj|BAF24593.1| Os09g0250700 [Oryza sativa Japonica Group]	P73627	50.1	4e-06
Unigene11616_Taxus	1374	254	15.9809	gi|147744722|gb|ABQ51227.1|	275	1e-111	R2R3-MYB transcription factor MYB11 [Picea glauca]	Q8GWP0	224	9e-58
Unigene11617_Taxus	1468	606	35.6862	gi|115441349|ref|NP_001044954.1|	289	1e-76	Os01g0873800 [Oryza sativa (japonica cultivar-group)] >gi|56785087|dbj|BAD82726.1| erythroid differentiation-related factor 1-like protein [Oryza sativa Japonica Group] >gi|113534485|dbj|BAF06868.1| Os01g0873800 [Oryza sativa Japonica Group]	--	--	--
Unigene11618_Taxus	462	25	4.6779	gi|224097572|ref|XP_002310991.1|	101	4e-21	cationic amino acid transporter [Populus trichocarpa] >gi|222850811|gb|EEE88358.1| cationic amino acid transporter [Populus trichocarpa]	B3TP03	50.8	3e-06
Unigene11619_Taxus	314	36	9.9112	gi|186478884|ref|NP_173957.2|	84.3	6e-16	DNA binding [Arabidopsis thaliana]	--	--	--
Unigene1161_Taxus	1527	316	17.8896	gi|115470797|ref|NP_001058997.1|	172	2e-41	Os07g0172200 [Oryza sativa (japonica cultivar-group)] >gi|113610533|dbj|BAF20911.1| Os07g0172200 [Oryza sativa Japonica Group]	O81242	170	3e-41
Unigene11620_Taxus	1181	205	15.0057	gi|18400752|ref|NP_566511.1|	395	1e-116	choline transporter-related [Arabidopsis thaliana]	Q54I48	82.8	4e-15
Unigene11621_Taxus	865	85	8.4949	gi|116789738|gb|ABK25364.1|	58.9	1e-07	unknown [Picea sitchensis]	--	--	--
Unigene11622_Taxus	3070	1292	36.3813	gi|42563074|ref|NP_177101.2|	560	1e-158	zinc finger (DHHC type) family protein [Arabidopsis thaliana] >gi|42572047|ref|NP_974114.1| zinc finger (DHHC type) family protein [Arabidopsis thaliana] >gi|223635846|sp|Q9C533.2|ZDHC1_ARATH RecName: Full=Probable S-acyltransferase At1g69420; AltName: Full=Probable palmitoyltransferase At1g69420; AltName: Full=Zinc finger DHHC domain-containing protein At1g69420	Q9C533	560	1e-158
Unigene11623_Taxus	409	30	6.3409	--	--	--	--	--	--	--
Unigene11624_Taxus	435	10	1.9873	gi|84514175|gb|ABC59096.1|	124	2e-41	cytochrome P450 monooxygenase CYP97C10 [Medicago truncatula]	O48921	62.8	7e-10
Unigene11625_Taxus	1271	103	7.0056	gi|240254592|ref|NP_181219.4|	307	1e-136	binding [Arabidopsis thaliana]	Q54F23	93.2	1e-37
Unigene11626_Taxus	246	49	17.2193	--	--	--	--	--	--	--
Unigene11627_Taxus	255	14	4.7461	--	--	--	--	--	--	--
Unigene11628_Taxus	1397	757	46.8439	gi|115474673|ref|NP_001060933.1|	277	5e-73	Os08g0133000 [Oryza sativa (japonica cultivar-group)] >gi|113622902|dbj|BAF22847.1| Os08g0133000 [Oryza sativa Japonica Group]	Q96SZ5	100	2e-20
Unigene11629_Taxus	259	4	1.3351	--	--	--	--	--	--	--
Unigene1162_Taxus	218	2	0.7931	--	--	--	--	--	--	--
Unigene11630_Taxus	573	69	10.4099	--	--	--	--	--	--	--
Unigene11631_Taxus	258	7	2.3455	--	--	--	--	--	--	--
Unigene11632_Taxus	4936	2016	35.3077	gi|225455092|ref|XP_002267865.1|	2410	0	PREDICTED: similar to GLT1 (NADH-dependent glutamate synthase 1 gene) [Vitis vinifera]	Q03460	2367	0
Unigene11633_Taxus	642	42	5.6555	--	--	--	--	--	--	--
Unigene11634_Taxus	257	5	1.6819	gi|240255788|ref|NP_192927.5|	60.8	8e-09	S-locus lectin protein kinase family protein [Arabidopsis thaliana] >gi|5002525|emb|CAB44328.1| KI domain interacting kinase 1-like protein [Arabidopsis thaliana] >gi|7267891|emb|CAB78233.1| KI domain interacting kinase 1-like protein [Arabidopsis thaliana]	--	--	--
Unigene11635_Taxus	326	31	8.2205	--	--	--	--	--	--	--
Unigene11636_Taxus	406	40	8.517	--	--	--	--	--	--	--
Unigene11637_Taxus	425	161	32.7484	gi|148905856|gb|ABR16090.1|	92	3e-18	unknown [Picea sitchensis]	--	--	--
Unigene11638_Taxus	2428	928	33.041	gi|15240413|ref|NP_198048.1|	284	8e-75	kelch repeat-containing F-box family protein [Arabidopsis thaliana] >gi|75127127|sp|Q6NPN5.1|FK113_ARATH RecName: Full=F-box/kelch-repeat protein At5g26960 >gi|38603834|gb|AAR24662.1| At5g26960 [Arabidopsis thaliana]	Q6NPN5	284	2e-75
Unigene11639_Taxus	354	33	8.0587	gi|115390925|ref|XP_001212967.1|	61.6	5e-09	polyadenylate-binding protein [Aspergillus terreus NIH2624] >gi|121739603|sp|Q0CR95.1|PABP_ASPTN RecName: Full=Polyadenylate-binding protein, cytoplasmic and nuclear; Short=Poly(A)-binding protein; Short=PABP; AltName: Full=Polyadenylate tail-binding protein >gi|114193891|gb|EAU35591.1| polyadenylate-binding protein [Aspergillus terreus NIH2624]	Q0CR95	61.6	1e-09
Unigene1163_Taxus	1221	154	10.9033	gi|22331355|ref|NP_189307.2|	176	2e-68	zinc finger (C3HC4-type RING finger) family protein [Arabidopsis thaliana]	Q8N5U6	78.2	1e-13
Unigene11640_Taxus	431	42	8.4241	gi|111120243|dbj|BAF02600.1|	105	2e-40	RNA ligase isoform 3 [Triticum aestivum]	--	--	--
Unigene11641_Taxus	951	295	26.8161	gi|227206426|dbj|BAH57268.1|	191	3e-47	AT3G62370 [Arabidopsis thaliana]	--	--	--
Unigene11642_Taxus	295	6	1.7583	gi|116788361|gb|ABK24851.1|	64.7	2e-17	unknown [Picea sitchensis]	--	--	--
Unigene11643_Taxus	263	4	1.3148	gi|225441323|ref|XP_002274379.1|	51.6	5e-06	PREDICTED: similar to maturase-like protein [Vitis vinifera]	--	--	--
Unigene11644_Taxus	1014	136	11.5946	gi|255676687|dbj|BAF18598.2|	86.3	2e-32	Os06g0129800 [Oryza sativa Japonica Group]	--	--	--
Unigene11645_Taxus	507	21	3.5807	gi|115486729|ref|NP_001068508.1|	76.3	9e-16	Os11g0695900 [Oryza sativa (japonica cultivar-group)] >gi|77552749|gb|ABA95546.1| expressed protein [Oryza sativa (japonica cultivar-group)]	--	--	--
Unigene11646_Taxus	275	12	3.7723	--	--	--	--	--	--	--
Unigene11647_Taxus	1099	132	10.3832	gi|92893674|gb|ABE91852.1|	258	2e-67	Protein kinase [Medicago truncatula] >gi|92893918|gb|ABE91968.1| Protein kinase [Medicago truncatula]	Q54R82	219	2e-56
Unigene11648_Taxus	379	28	6.3866	--	--	--	--	--	--	--
Unigene11649_Taxus	1989	937	40.7247	gi|15237391|ref|NP_199429.1|	227	1e-107	F-box family protein [Arabidopsis thaliana] >gi|75262767|sp|Q9FNK5.1|FB285_ARATH RecName: Full=F-box protein At5g46170	Q9FNK5	227	1e-108
Unigene1164_Taxus	257	6	2.0182	--	--	--	--	--	--	--
Unigene11650_Taxus	982	554	48.7699	gi|115451387|ref|NP_001049294.1|	63.5	6e-14	Os03g0201000 [Oryza sativa (japonica cultivar-group)] >gi|108706701|gb|ABF94496.1| expressed protein [Oryza sativa (japonica cultivar-group)] >gi|113547765|dbj|BAF11208.1| Os03g0201000 [Oryza sativa Japonica Group]	--	--	--
Unigene11651_Taxus	3206	1317	35.5121	gi|224073351|ref|XP_002304082.1|	1004	0	heavy metal ATPase [Populus trichocarpa] >gi|222841514|gb|EEE79061.1| heavy metal ATPase [Populus trichocarpa]	Q9SZC9	988	0
Unigene11652_Taxus	255	9	3.0511	gi|156186825|gb|ABU55668.1|	80.5	9e-15	CBF1-like protein [Cissus verticillata] >gi|156186827|gb|ABU55669.1| CBF1-like protein [Leea guineensis]	Q9ZQP3	77.4	3e-14
Unigene11653_Taxus	222	12	4.6728	--	--	--	--	--	--	--
Unigene11654_Taxus	935	88	8.1363	gi|164457637|dbj|BAF96543.1|	406	1e-112	oxysterol-binding protein [Glycine max]	O14340	182	2e-45
Unigene11655_Taxus	1244	425	29.534	gi|18395564|ref|NP_027545.1|	483	1e-135	band 7 family protein [Arabidopsis thaliana] >gi|20197740|gb|AAD17426.2| expressed protein [Arabidopsis thaliana]	Q1RMU4	352	3e-96
Unigene11656_Taxus	2546	300	10.1863	gi|168033977|ref|XP_001769490.1|	447	0	ETR2 ethylene receptor [Physcomitrella patens subsp. patens] >gi|162679201|gb|EDQ65651.1| ETR2 ethylene receptor [Physcomitrella patens subsp. patens]	Q9ZTP3	395	1e-158
Unigene11657_Taxus	254	8	2.7228	--	--	--	--	--	--	--
Unigene11658_Taxus	543	194	30.8856	--	--	--	--	--	--	--
Unigene11659_Taxus	298	16	4.6415	gi|15225445|ref|NP_178983.1|	112	2e-24	pentatricopeptide (PPR) repeat-containing protein [Arabidopsis thaliana] >gi|75206168|sp|Q9SIT7.1|PP151_ARATH RecName: Full=Pentatricopeptide repeat-containing protein At2g13600	Q9SIT7	112	7e-25
Unigene1165_Taxus	579	127	18.9618	gi|115440305|ref|NP_001044432.1|	140	2e-32	Os01g0779300 [Oryza sativa (japonica cultivar-group)] >gi|113533963|dbj|BAF06346.1| Os01g0779300 [Oryza sativa Japonica Group]	Q9M0X5	96.3	1e-19
Unigene11660_Taxus	3452	844	21.1361	gi|221327797|gb|ACM17612.1|	947	0	phosphatidylinositol kinase [Oryza nivara] >gi|221327842|gb|ACM17654.1| phosphatidylinositol kinase [Oryza rufipogon]	P54677	305	1e-81
Unigene11661_Taxus	484	73	13.0386	--	--	--	--	--	--	--
Unigene11662_Taxus	510	45	7.6277	gi|30690642|ref|NP_195357.2|	103	3e-46	radical SAM domain-containing protein / TRAM domain-containing protein [Arabidopsis thaliana] >gi|32129440|sp|Q8H0V1.1|CK5P1_ARATH RecName: Full=CDK5RAP1-like protein >gi|30725464|gb|AAP37754.1| At4g36390 [Arabidopsis thaliana]	Q8H0V1	103	1e-46
Unigene11663_Taxus	236	160	58.6086	--	--	--	--	--	--	--
Unigene11664_Taxus	273	30	9.4997	gi|237682379|gb|ACR10239.1|	131	5e-30	heparanase [Oryza sativa Indica Group]	Q9FZP1	124	2e-28
Unigene11665_Taxus	397	5824	1268.19	--	--	--	--	--	--	--
Unigene11666_Taxus	1511	448	25.6311	gi|172072936|ref|YP_001806697.1|	423	1e-137	NADH dehydrogenase subunit 4 [Cryptomeria japonica] >gi|193806224|sp|B1VKI4.1|NU4C_CRYJA RecName: Full=NAD(P)H-quinone oxidoreductase chain 4, chloroplastic; AltName: Full=NAD(P)H dehydrogenase, chain 4; AltName: Full=NADH-plastoquinone oxidoreductase chain 4 >gi|171854955|dbj|BAG16695.1| NADH-plastoquinone oxidoreductase subunit 4 [Cryptomeria japonica] >gi|239794323|dbj|BAH73320.1| NADH-plastoq…	B1VKI4	423	1e-138
Unigene11667_Taxus	600	51	7.3481	gi|22331914|ref|NP_191850.2|	220	1e-56	APG3 (ALBINO AND PALE GREEN); translation release factor/ translation release factor, codon specific [Arabidopsis thaliana] >gi|19699096|gb|AAL90914.1| AT3g62910/T20O10_10 [Arabidopsis thaliana] >gi|21928033|gb|AAM78045.1| AT3g62910/T20O10_10 [Arabidopsis thaliana] >gi|34392768|dbj|BAC82693.1| Chloroplast Release Factor 1 [Arabidopsis thaliana]	B7KI17	164	5e-40
Unigene11668_Taxus	558	172	26.647	--	--	--	--	--	--	--
Unigene11669_Taxus	274	20	6.3101	--	--	--	--	--	--	--
Unigene1166_Taxus	627	75	10.3406	gi|102139798|gb|ABF69983.1|	130	2e-29	zinc finger (C3HC4 type RING finger) family protein [Musa acuminata]	--	--	--
Unigene11670_Taxus	759	198	22.5516	--	--	--	--	--	--	--
Unigene11671_Taxus	467	1677	310.434	gi|56481809|gb|AAV92535.1|	183	1e-45	thiazole biosynthetic enzyme [Pseudotsuga menziesii var. menziesii]	O23787	175	9e-44
Unigene11672_Taxus	1011	93	7.9522	gi|115474983|ref|NP_001061088.1|	133	1e-34	Os08g0169700 [Oryza sativa (japonica cultivar-group)] >gi|113623057|dbj|BAF23002.1| Os08g0169700 [Oryza sativa Japonica Group]	--	--	--
Unigene11673_Taxus	615	382	53.696	gi|115445687|ref|NP_001046623.1|	322	3e-87	Os02g0301500 [Oryza sativa (japonica cultivar-group)] >gi|113536154|dbj|BAF08537.1| Os02g0301500 [Oryza sativa Japonica Group]	Q38953	318	2e-86
Unigene11674_Taxus	3131	633	17.4773	gi|22327888|ref|NP_200462.2|	370	1e-105	APUM12 (ARABIDOPSIS PUMILIO 12); RNA binding / binding [Arabidopsis thaliana]	Q92359	255	2e-69
Unigene11675_Taxus	740	106	12.3831	gi|115466680|ref|NP_001056939.1|	171	5e-85	Os06g0172000 [Oryza sativa (japonica cultivar-group)] >gi|113594979|dbj|BAF18853.1| Os06g0172000 [Oryza sativa Japonica Group]	Q9FKC3	170	1e-83
Unigene11676_Taxus	510	89	15.086	--	--	--	--	--	--	--
Unigene11677_Taxus	237	6	2.1885	--	--	--	--	--	--	--
Unigene11678_Taxus	530	83	13.538	--	--	--	--	--	--	--
Unigene11679_Taxus	260	63	20.9469	gi|268326822|emb|CAT00082.1|	71.2	6e-12	hydroxycinnamoyl-CoA shikimate/quinate hydroxycinnamoyl transferase [Coffea arabica]	--	--	--
Unigene1167_Taxus	255	4	1.356	gi|225442190|ref|XP_002274489.1|	52.8	1e-14	PREDICTED: similar to midasin-related [Vitis vinifera]	Q869L3	51.2	8e-14
Unigene11680_Taxus	575	50	7.5172	--	--	--	--	--	--	--
Unigene11681_Taxus	408	23	4.8733	gi|18423468|ref|NP_568784.1|	60.5	3e-12	kinesin light chain-related [Arabidopsis thaliana] >gi|53828571|gb|AAU94395.1| At5g53080 [Arabidopsis thaliana]	--	--	--
Unigene11682_Taxus	235	26	9.5644	--	--	--	--	--	--	--
Unigene11683_Taxus	3558	556	13.509	gi|115453209|ref|NP_001050205.1|	428	1e-118	Os03g0372500 [Oryza sativa (japonica cultivar-group)] >gi|108708396|gb|ABF96191.1| Protein phosphatase 2C containing protein, expressed [Oryza sativa (japonica cultivar-group)] >gi|108708397|gb|ABF96192.1| Protein phosphatase 2C containing protein, expressed [Oryza sativa (japonica cultivar-group)] >gi|113548676|dbj|BAF12119.1| Os03g0372500 [Oryza sativa Japonica Group]	O82302	403	1e-111
Unigene11684_Taxus	239	18	6.5107	gi|9758453|dbj|BAB08982.1|	78.6	4e-14	selenium-binding protein-like [Arabidopsis thaliana]	Q9LZ19	78.6	1e-14
Unigene11685_Taxus	1312	233	15.3524	gi|224125738|ref|XP_002319663.1|	319	1e-85	chromatin remodeling complex subunit [Populus trichocarpa] >gi|222858039|gb|EEE95586.1| chromatin remodeling complex subunit [Populus trichocarpa]	Q61687	103	2e-21
Unigene11686_Taxus	245	38	13.4082	--	--	--	--	--	--	--
Unigene11687_Taxus	1352	264	16.8803	gi|95147274|gb|ABF57272.1|	402	1e-111	At2g31800 [Arabidopsis thaliana]	P18160	157	2e-37
Unigene11688_Taxus	423	25	5.1092	gi|4836874|gb|AAD30577.1|AC007260_8	135	3e-31	Hypothetical protein [Arabidopsis thaliana]	Q500Y9	135	1e-31
Unigene11689_Taxus	1404	149	9.1743	gi|8096269|dbj|BAA95789.1|	79	3e-13	KED [Nicotiana tabacum]	Q05D44	75.1	1e-12
Unigene1168_Taxus	2128	258	10.481	gi|2980817|emb|CAA82046.1|	55.1	7e-06	MNN4 [Saccharomyces cerevisiae]	Q869E1	62.8	1e-08
Unigene11690_Taxus	252	24	8.2331	gi|9758730|dbj|BAB09168.1|	54.3	1e-14	replication protein A1-like [Arabidopsis thaliana]	Q5FW17	47.8	5e-13
Unigene11691_Taxus	447	43	8.316	--	--	--	--	--	--	--
Unigene11692_Taxus	297	77	22.4124	--	--	--	--	--	--	--
Unigene11693_Taxus	567	57	8.6905	gi|190612857|gb|ACE80806.1|	146	2e-34	pentatricopeptide repeat protein [Picea abies]	Q9SUH6	133	8e-31
Unigene11694_Taxus	801	64	6.9072	gi|22326571|ref|NP_195861.2|	93.2	5e-39	DIE2/ALG10 family [Arabidopsis thaliana]	Q5BKT4	71.6	5e-20
Unigene11695_Taxus	991	189	16.487	gi|42562121|ref|NP_173178.3|	330	4e-89	auxin-induced-related / indole-3-acetic acid induced-related [Arabidopsis thaliana] >gi|209572597|sp|Q9LQI7.2|CIA30_ARATH RecName: Full=Probable complex I intermediate-associated protein 30 >gi|117168231|gb|ABK32198.1| At1g17350 [Arabidopsis thaliana]	Q9LQI7	330	1e-89
Unigene11696_Taxus	242	20	7.1444	--	--	--	--	--	--	--
Unigene11697_Taxus	4495	2860	55.0034	gi|62002537|gb|AAX58753.1|	1009	0	PUF-domain RNA-binding protein [Physcomitrella patens]	Q80U58	406	1e-112
Unigene11698_Taxus	253	5	1.7085	--	--	--	--	--	--	--
Unigene11699_Taxus	505	36	6.1626	gi|15240970|ref|NP_195760.1|	108	6e-23	ESP4 (ENHANCED SILENCING PHENOTYPE 4); binding [Arabidopsis thaliana]	--	--	--
Unigene1169_Taxus	572	17	2.5693	--	--	--	--	--	--	--
Unigene116_Taxus	1249	325	22.4944	gi|225453622|ref|XP_002267721.1|	418	1e-115	PREDICTED: similar to pentatricopeptide (PPR) repeat-containing protein [Vitis vinifera]	Q8L838	408	1e-113
Unigene11700_Taxus	343	15	3.7805	--	--	--	--	--	--	--
Unigene11701_Taxus	633	45	6.1456	gi|92870988|gb|ABE80149.1|	132	1e-59	Tetratricopeptide-like helical [Medicago truncatula]	O81767	135	6e-60
Unigene11702_Taxus	396	33	7.204	--	--	--	--	--	--	--
Unigene11703_Taxus	289	16	4.786	--	--	--	--	--	--	--
Unigene11704_Taxus	455	35	6.6498	gi|166159757|gb|ABY83271.1|	167	5e-41	alpha-mannosidase [Solanum lycopersicum]	O09159	138	1e-32
Unigene11705_Taxus	275	14	4.401	gi|4138282|emb|CAA09697.1|	58.5	2e-19	RNA-directed RNA polymerase [Nicotiana tabacum]	Q0DXS3	53.5	2e-16
Unigene11706_Taxus	258	20	6.7014	--	--	--	--	--	--	--
Unigene11707_Taxus	457	20	3.7833	--	--	--	--	--	--	--
Unigene11708_Taxus	1041	289	23.9994	gi|34365675|gb|AAQ65149.1|	194	2e-48	At2g27790 [Arabidopsis thaliana]	A4FVJ7	123	2e-27
Unigene11709_Taxus	716	77	9.2968	gi|13661199|gb|AAK37825.1|AF132121_1	299	2e-96	laccase [Pinus taeda]	Q9FJD5	263	8e-86
Unigene1170_Taxus	220	18	7.073	--	--	--	--	--	--	--
Unigene11710_Taxus	255	9	3.0511	--	--	--	--	--	--	--
Unigene11711_Taxus	680	82	10.4246	gi|160346973|gb|ABX26124.1|	72.4	8e-12	bypass1 [Nicotiana benthamiana]	Q9LMM6	70.1	1e-11
Unigene11712_Taxus	519	36	5.9964	gi|30697417|ref|NP_200878.2|	188	5e-47	glycosyltransferase family protein 2 [Arabidopsis thaliana]	--	--	--
Unigene11713_Taxus	1289	459	30.7832	gi|82697963|gb|ABB89016.1|	238	3e-61	CXE carboxylesterase [Actinidia deliciosa]	Q940G6	167	1e-40
Unigene11714_Taxus	3273	857	22.6354	gi|32487866|emb|CAE05634.1|	955	0	OSJNBb0061C13.16 [Oryza sativa (japonica cultivar-group)] >gi|32492244|emb|CAE03741.1| OSJNBa0019D11.4 [Oryza sativa (japonica cultivar-group)] >gi|116310817|emb|CAH67606.1| OSIGBa0145G11.5 [Oryza sativa (indica cultivar-group)]	Q0VGW4	224	2e-57
Unigene11715_Taxus	1727	256	12.8145	gi|16604352|gb|AAL24182.1|	213	1e-140	AT5g12010/F14F18_180 [Arabidopsis thaliana] >gi|25141199|gb|AAN73294.1| At5g12010/F14F18_180 [Arabidopsis thaliana]	Q17QR8	51.6	9e-09
Unigene11716_Taxus	681	91	11.5518	gi|124361014|gb|ABN08986.1|	49.3	3e-09	UDP-glucuronosyl/UDP-glucosyltransferase [Medicago truncatula]	Q9SK82	45.8	2e-06
Unigene11717_Taxus	406	34	7.2395	--	--	--	--	--	--	--
Unigene11718_Taxus	310	20	5.5773	gi|116312011|emb|CAJ86368.1|	105	2e-22	OSIGBa0117N13.12 [Oryza sativa (indica cultivar-group)] >gi|116312054|emb|CAJ86418.1| H0303G06.7 [Oryza sativa (indica cultivar-group)]	Q9LSZ0	90.9	2e-18
Unigene11719_Taxus	5136	1495	25.1634	gi|186510319|ref|NP_001118676.1|	147	2e-33	TIC (TIME FOR COFFEE) [Arabidopsis thaliana]	Q94KE2	147	6e-34
Unigene1171_Taxus	907	258	24.5904	gi|222423838|dbj|BAH19884.1|	148	1e-34	AT1G21065 [Arabidopsis thaliana]	P0A2L1	138	6e-32
Unigene11720_Taxus	498	174	30.2046	--	--	--	--	--	--	--
Unigene11721_Taxus	536	23	3.7095	gi|75175345|sp|Q9LP24.1|Y1571_ARATH	43.5	2e-10	RecName: Full=Probable leucine-rich repeat receptor-like protein kinase At1g35710; Flags: Precursor >gi|8778966|gb|AAF79881.1|AC021198_1 Contains similarity to receptor protein kinase-like protein from Arabidopsis thaliana gb|AL161513. It contains a eukaryotic protein kinase domain PF|00069. EST gb|AI997574 comes from this gene	P93194	38.1	2e-10
Unigene11722_Taxus	8693	3362	33.4335	gi|225445342|ref|XP_002281542.1|	3802	0	PREDICTED: similar to GRV2 (KATAMARI2); binding / heat shock protein binding [Vitis vinifera]	O75165	808	0
Unigene11723_Taxus	448	45	8.6834	gi|253740260|gb|ACT34764.1|	78.6	4e-14	subtilisin-like protease preproenzyme [Nicotiana tabacum]	O65351	67.8	2e-11
Unigene11724_Taxus	273	31	9.8164	--	--	--	--	--	--	--
Unigene11725_Taxus	263	6	1.9722	--	--	--	--	--	--	--
Unigene11726_Taxus	293	187	55.1731	gi|115470599|ref|NP_001058898.1|	99.4	2e-20	Os07g0150100 [Oryza sativa (japonica cultivar-group)] >gi|113610434|dbj|BAF20812.1| Os07g0150100 [Oryza sativa Japonica Group]	--	--	--
Unigene11727_Taxus	2043	367	15.5293	gi|225445820|ref|XP_002277050.1|	648	0	PREDICTED: similar to PsHSP71.2 [Vitis vinifera]	P26413	639	0
Unigene11728_Taxus	658	55	7.2259	gi|18398716|ref|NP_565437.1|	104	2e-43	hydrolase, alpha/beta fold family protein [Arabidopsis thaliana] >gi|13605611|gb|AAK32799.1|AF361631_1 At2g18360/T30D6.13 [Arabidopsis thaliana] >gi|20197805|gb|AAD15501.2| expressed protein [Arabidopsis thaliana] >gi|21360541|gb|AAM47467.1| At2g18360/T30D6.13 [Arabidopsis thaliana]	P0A573	38.1	2e-06
Unigene11729_Taxus	338	14	3.5807	gi|115448057|ref|NP_001047808.1|	88.2	9e-27	Os02g0694800 [Oryza sativa (japonica cultivar-group)] >gi|113537339|dbj|BAF09722.1| Os02g0694800 [Oryza sativa Japonica Group]	--	--	--
Unigene1172_Taxus	433	7	1.3975	gi|15220590|ref|NP_172050.1|	103	5e-31	HEXO2 (BETA-HEXOSAMINIDASE 2); beta-N-acetylhexosaminidase/ hexosaminidase/ hydrolase, hydrolyzing O-glycosyl compounds [Arabidopsis thaliana] >gi|4836910|gb|AAD30612.1|AC007153_4 Similar to hexosaminidase [Arabidopsis thaliana]	--	--	--
Unigene11730_Taxus	699	151	18.6747	gi|195658737|gb|ACG48836.1|	127	3e-30	ubiquitin-protein ligase/ zinc ion binding protein [Zea mays]	Q84K34	125	4e-29
Unigene11731_Taxus	252	12	4.1166	--	--	--	--	--	--	--
Unigene11732_Taxus	257	8	2.691	--	--	--	--	--	--	--
Unigene11733_Taxus	3657	777	18.3675	gi|15242310|ref|NP_196472.1|	477	0	ILP1 (increased level of polyploidy1-1D); translation repressor [Arabidopsis thaliana] >gi|117413996|dbj|BAF36503.1| transcriptional repressor ILP1 [Arabidopsis thaliana]	Q9Y5B6	152	5e-56
Unigene11734_Taxus	1484	434	25.2819	gi|18397669|ref|NP_566289.1|	129	1e-49	PAPA-1-like family protein / zinc finger (HIT type) family protein [Arabidopsis thaliana]	Q9U7E0	58.9	9e-08
Unigene11735_Taxus	632	117	16.0038	gi|30683905|ref|NP_850121.1|	55.8	6e-07	BGAL8 (beta-galactosidase 8); beta-galactosidase/ catalytic/ cation binding / sugar binding [Arabidopsis thaliana] >gi|152013364|sp|Q9SCV4.2|BGAL8_ARATH RecName: Full=Beta-galactosidase 8; Short=Lactase 8; AltName: Full=Protein AR782; Flags: Precursor	Q9SCV4	55.8	2e-07
Unigene11736_Taxus	587	62	9.1308	--	--	--	--	--	--	--
Unigene11737_Taxus	1527	727	41.1575	gi|30683577|ref|NP_193356.2|	331	3e-89	ECHIA (ENOYL-COA HYDRATASE/ISOMERASE A); catalytic [Arabidopsis thaliana] >gi|46518363|gb|AAS99663.1| At4g16210 [Arabidopsis thaliana] >gi|48958507|gb|AAT47806.1| At4g16210 [Arabidopsis thaliana]	Q1ZXF1	147	3e-34
Unigene11738_Taxus	2300	682	25.6336	gi|115489292|ref|NP_001067133.1|	271	1e-127	Os12g0580900 [Oryza sativa (japonica cultivar-group)] >gi|122203382|sp|Q2QN36.1|P2C78_ORYSJ RecName: Full=Probable protein phosphatase 2C 78; Short=OsPP2C78 >gi|113649640|dbj|BAF30152.1| Os12g0580900 [Oryza sativa Japonica Group]	Q2QN36	271	1e-128
Unigene11739_Taxus	1661	159	8.2752	gi|15227541|ref|NP_178413.1|	179	2e-43	CAAX amino terminal protease family protein [Arabidopsis thaliana] >gi|3548816|gb|AAC34488.1| similar to late embryogenesis abundant proteins [Arabidopsis thaliana]	Q40863	78.6	1e-13
Unigene1173_Taxus	1724	194	9.7279	gi|17221648|dbj|BAB78478.1|	70.1	2e-10	preproMP73 [Cucurbita maxima]	P22793	74.3	2e-12
Unigene11740_Taxus	580	62	9.241	--	--	--	--	--	--	--
Unigene11741_Taxus	754	426	48.8418	--	--	--	--	--	--	--
Unigene11742_Taxus	385	12	2.6945	gi|56744207|dbj|BAD81043.1|	97.1	7e-42	calnexin [Glycine max]	Q39817	97.1	2e-42
Unigene11743_Taxus	246	15	5.2712	gi|15010636|gb|AAK73977.1|	148	4e-35	At1g20880/F9H16_14 [Arabidopsis thaliana]	Q5ZJX4	105	1e-22
Unigene11744_Taxus	269	6	1.9282	--	--	--	--	--	--	--
Unigene11745_Taxus	288	16	4.8027	gi|220966830|gb|ACL97383.1|	58.9	3e-08	Gag-Pol polyprotein [Medicago truncatula]	--	--	--
Unigene11746_Taxus	490	22	3.8813	gi|168000172|ref|XP_001752790.1|	60.5	1e-08	predicted protein [Physcomitrella patens subsp. patens] >gi|162695953|gb|EDQ82294.1| predicted protein [Physcomitrella patens subsp. patens]	--	--	--
Unigene11747_Taxus	4604	1419	26.6441	gi|115455785|ref|NP_001051493.1|	1115	0	Os03g0786900 [Oryza sativa (japonica cultivar-group)] >gi|50355723|gb|AAT75248.1| expressed protein [Oryza sativa Japonica Group] >gi|108711444|gb|ABF99239.1| expressed protein [Oryza sativa (japonica cultivar-group)] >gi|113549964|dbj|BAF13407.1| Os03g0786900 [Oryza sativa Japonica Group]	Q9Y2L5	266	1e-69
Unigene11748_Taxus	552	45	7.0474	gi|115447329|ref|NP_001047444.1|	84	2e-15	Os02g0617700 [Oryza sativa (japonica cultivar-group)] >gi|113536975|dbj|BAF09358.1| Os02g0617700 [Oryza sativa Japonica Group]	P44584	69.3	1e-11
Unigene11749_Taxus	255	4	1.356	--	--	--	--	--	--	--
Unigene1174_Taxus	548	48	7.5721	--	--	--	--	--	--	--
Unigene11750_Taxus	1121	265	20.4359	gi|115488172|ref|NP_001066573.1|	341	2e-92	Os12g0279600 [Oryza sativa (japonica cultivar-group)] >gi|77554323|gb|ABA97119.1| exodeoxyribonuclease III family protein, expressed [Oryza sativa (japonica cultivar-group)] >gi|113649080|dbj|BAF29592.1| Os12g0279600 [Oryza sativa Japonica Group]	P43138	97.1	2e-19
Unigene11751_Taxus	258	13	4.3559	gi|255674294|dbj|BAF11227.2|	62	3e-09	Os03g0205400 [Oryza sativa Japonica Group]	Q9ATY5	55.8	8e-08
Unigene11752_Taxus	2106	460	18.8822	gi|15231445|ref|NP_190235.1|	233	1e-118	PUB13 (PLANT U-BOX 13); ubiquitin-protein ligase [Arabidopsis thaliana] >gi|75266129|sp|Q9SNC6.1|PUB13_ARATH RecName: Full=U-box domain-containing protein 13; AltName: Full=Plant U-box protein 13 >gi|6523054|emb|CAB62321.1| arm repeat containing protein homolog [Arabidopsis thaliana] >gi|14596007|gb|AAK68731.1| arm repeat containing protein homolog [Arabidopsis thaliana] >gi|22136270|gb|AAM91213.…	Q9SNC6	233	1e-119
Unigene11753_Taxus	849	52	5.2948	--	--	--	--	--	--	--
Unigene11754_Taxus	2069	263	10.9888	gi|115459200|ref|NP_001053200.1|	491	1e-137	Os04g0496400 [Oryza sativa (japonica cultivar-group)] >gi|38345380|emb|CAE03112.2| OSJNBa0067K08.9 [Oryza sativa (japonica cultivar-group)] >gi|113564771|dbj|BAF15114.1| Os04g0496400 [Oryza sativa Japonica Group]	Q8BGC0	159	4e-41
Unigene11755_Taxus	288	72	21.6119	--	--	--	--	--	--	--
Unigene11756_Taxus	952	220	19.9774	--	--	--	--	--	--	--
Unigene11757_Taxus	745	184	21.3508	gi|148909539|gb|ABR17864.1|	101	1e-20	unknown [Picea sitchensis]	--	--	--
Unigene11758_Taxus	1161	211	15.711	gi|115456469|ref|NP_001051835.1|	447	1e-137	Os03g0838100 [Oryza sativa (japonica cultivar-group)] >gi|113550306|dbj|BAF13749.1| Os03g0838100 [Oryza sativa Japonica Group]	P17801	204	5e-54
Unigene11759_Taxus	328	39	10.2788	gi|226532850|ref|NP_001149395.1|	68.6	6e-22	secretory protein [Zea mays] >gi|195626940|gb|ACG35300.1| secretory protein [Zea mays]	--	--	--
Unigene1175_Taxus	780	232	25.7127	--	--	--	--	--	--	--
Unigene11760_Taxus	321	64	17.2357	--	--	--	--	--	--	--
Unigene11761_Taxus	374	101	23.3455	gi|18419661|gb|AAL69394.1|AF463497_1	82.4	3e-17	lycopene epsilon-cyclase [Spinacia oleracea]	O65837	76.3	6e-16
Unigene11762_Taxus	784	71	7.8288	gi|15238468|ref|NP_201348.1|	139	5e-32	UBP17 (UBIQUITIN-SPECIFIC PROTEASE 17); cysteine-type endopeptidase/ ubiquitin thiolesterase/ zinc ion binding [Arabidopsis thaliana] >gi|75262625|sp|Q9FKP5.1|UBP17_ARATH RecName: Full=Ubiquitin carboxyl-terminal hydrolase 17; AltName: Full=Ubiquitin thioesterase 17; AltName: Full=Ubiquitin-specific-processing protease 17; AltName: Full=Deubiquitinating enzyme 17; Short=AtUBP17	Q9FKP5	139	2e-32
Unigene11763_Taxus	289	28	8.3756	--	--	--	--	--	--	--
Unigene11764_Taxus	1682	304	15.6243	gi|186511411|ref|NP_001118908.1|	410	1e-113	ubiquitin thiolesterase [Arabidopsis thaliana]	--	--	--
Unigene11765_Taxus	340	62	15.764	gi|168001809|ref|XP_001753607.1|	56.6	1e-07	predicted protein [Physcomitrella patens subsp. patens] >gi|162695486|gb|EDQ81830.1| predicted protein [Physcomitrella patens subsp. patens]	--	--	--
Unigene11766_Taxus	254	5	1.7017	--	--	--	--	--	--	--
Unigene11767_Taxus	2337	651	24.0811	gi|226492519|ref|NP_001151614.1|	470	0	LOC100285248 [Zea mays] >gi|195648100|gb|ACG43518.1| calmodulin-binding protein MPCBP [Zea mays]	Q9ULT0	79.3	1e-24
Unigene11768_Taxus	551	38	5.9619	gi|126635783|gb|ABO21768.1|	115	9e-49	sugar transporter protein [Ananas comosus]	Q93YP9	109	1e-48
Unigene11769_Taxus	218	25	9.9137	gi|148909462|gb|ABR17829.1|	70.1	1e-17	unknown [Picea sitchensis]	--	--	--
Unigene1176_Taxus	257	7	2.3546	gi|225349592|gb|ACN87690.1|	53.1	1e-13	kinase-like protein [Corylus avellana]	Q8RY67	49.7	2e-13
Unigene11770_Taxus	312	7	1.9395	gi|115454313|ref|NP_001050757.1|	92	3e-18	Os03g0644200 [Oryza sativa (japonica cultivar-group)] >gi|53749418|gb|AAU90276.1| PPR repeat containing protein [Oryza sativa Japonica Group] >gi|255674740|dbj|BAH92290.1| Os03g0644100 [Oryza sativa Japonica Group]	Q9SY02	90.1	4e-18
Unigene11771_Taxus	1639	1062	56.0143	gi|115440703|ref|NP_001044631.1|	177	8e-43	Os01g0818400 [Oryza sativa (japonica cultivar-group)] >gi|75286325|sp|Q5QMM3.1|WOX8_ORYSJ RecName: Full=WUSCHEL-related homeobox 8; AltName: Full=OsWOX8; AltName: Full=Protein WOX13 >gi|113534162|dbj|BAF06545.1| Os01g0818400 [Oryza sativa Japonica Group]	Q5QMM3	177	3e-43
Unigene11772_Taxus	1006	164	14.0929	gi|21703127|gb|AAM74504.1|	101	6e-27	AT5g12260/MXC9_22 [Arabidopsis thaliana] >gi|34365563|gb|AAQ65093.1| At5g12260/MXC9_22 [Arabidopsis thaliana]	--	--	--
Unigene11773_Taxus	1205	236	16.9308	gi|5731259|gb|AAD48837.1|AF166351_1	657	0	alanine:glyoxylate aminotransferase 2 homolog [Arabidopsis thaliana]	Q940M2	656	0
Unigene11774_Taxus	1292	550	36.8005	gi|3738323|gb|AAC63664.1|	232	2e-59	expressed protein [Arabidopsis thaliana]	Q54UB0	117	2e-25
Unigene11775_Taxus	686	33	4.1586	--	--	--	--	--	--	--
Unigene11776_Taxus	3471	941	23.4363	gi|87162600|gb|ABD28395.1|	976	0	Nucleoporin interacting component; Protein prenyltransferase [Medicago truncatula]	O22224	921	0
Unigene11777_Taxus	375	19	4.38	gi|195542171|gb|ACF98296.1|	52.4	3e-06	eIF-4A [Pennisetum glaucum]	Q10I26	52.4	8e-07
Unigene11778_Taxus	417	14	2.9023	--	--	--	--	--	--	--
Unigene11779_Taxus	220	3	1.1788	gi|168033273|ref|XP_001769140.1|	81.3	2e-22	cellulose synthase-like D3, glycosyltransferase family 2 protein [Physcomitrella patens subsp. patens] >gi|162679566|gb|EDQ66012.1| cellulose synthase-like D3, glycosyltransferase family 2 protein [Physcomitrella patens subsp. patens]	Q9LFL0	80.5	1e-22
Unigene1177_Taxus	238	4	1.4529	--	--	--	--	--	--	--
Unigene11780_Taxus	246	5	1.7571	--	--	--	--	--	--	--
Unigene11781_Taxus	234	18	6.6498	--	--	--	--	--	--	--
Unigene11782_Taxus	1291	140	9.3747	gi|289619318|emb|CBI53601.1|	40	9e-07	unnamed protein product [Sordaria macrospora]	--	--	--
Unigene11783_Taxus	275	126	39.6088	--	--	--	--	--	--	--
Unigene11784_Taxus	1251	104	7.1867	--	--	--	--	--	--	--
Unigene11785_Taxus	201	10	4.3009	--	--	--	--	--	--	--
Unigene11786_Taxus	213	15	6.0879	--	--	--	--	--	--	--
Unigene11787_Taxus	1182	193	14.1154	gi|226494421|ref|NP_001149201.1|	342	1e-92	riboflavin biosynthesis protein ribAB [Zea mays] >gi|195625424|gb|ACG34542.1| riboflavin biosynthesis protein ribAB [Zea mays]	P47924	318	6e-86
Unigene11788_Taxus	261	10	3.3122	gi|190612853|gb|ACE80804.1|	51.6	5e-06	pentatricopeptide repeat protein [Cycas revoluta]	--	--	--
Unigene11789_Taxus	276	18	5.6379	--	--	--	--	--	--	--
Unigene1178_Taxus	473	133	24.3077	--	--	--	--	--	--	--
Unigene11790_Taxus	1150	297	22.3261	gi|115480623|ref|NP_001063905.1|	306	1e-134	Os09g0557700 [Oryza sativa (japonica cultivar-group)]	Q9VGY6	57.4	2e-07
Unigene11791_Taxus	505	43	7.3609	--	--	--	--	--	--	--
Unigene11792_Taxus	2290	539	20.3473	gi|115448033|ref|NP_001047796.1|	176	2e-42	Os02g0692000 [Oryza sativa (japonica cultivar-group)] >gi|41052984|dbj|BAD07893.1| zinc finger (C3HC4-type RING finger)-like [Oryza sativa Japonica Group] >gi|41053267|dbj|BAD07693.1| zinc finger (C3HC4-type RING finger)-like [Oryza sativa Japonica Group] >gi|113537327|dbj|BAF09710.1| Os02g0692000 [Oryza sativa Japonica Group]	Q9LF64	175	1e-42
Unigene11793_Taxus	2053	296	12.464	gi|18033509|gb|AAL57179.1|AF345652_1	90.1	2e-16	functional resistance protein KR2 [Glycine max]	Q40392	77.4	4e-13
Unigene11794_Taxus	967	216	19.3099	gi|17065472|gb|AAL32890.1|	166	5e-40	Unknown protein [Arabidopsis thaliana]	--	--	--
Unigene11795_Taxus	339	34	8.6703	--	--	--	--	--	--	--
Unigene11796_Taxus	457	197	37.2652	gi|256708586|gb|ACV20867.1|	134	8e-31	polar tube protein PTP2c [Antonospora locustae]	P05790	139	9e-33
Unigene11797_Taxus	1458	503	29.8239	gi|115449177|ref|NP_001048368.1|	461	1e-153	Os02g0793300 [Oryza sativa (japonica cultivar-group)] >gi|47497142|dbj|BAD19191.1| MutT/nudix protein-like [Oryza sativa Japonica Group] >gi|47497589|dbj|BAD19659.1| MutT/nudix protein-like [Oryza sativa Japonica Group] >gi|113537899|dbj|BAF10282.1| Os02g0793300 [Oryza sativa Japonica Group]	Q8L831	470	1e-152
Unigene11798_Taxus	491	37	6.5144	--	--	--	--	--	--	--
Unigene11799_Taxus	409	26	5.4955	--	--	--	--	--	--	--
Unigene1179_Taxus	321	20	5.3862	gi|115482244|ref|NP_001064715.1|	85.1	4e-16	Os10g0446200 [Oryza sativa (japonica cultivar-group)] >gi|113639324|dbj|BAF26629.1| Os10g0446200 [Oryza sativa Japonica Group]	--	--	--
[truncated: 34,495 more rows]
