# Supplementary material for: The First Insight into the Tissue Specific Taxus Transcriptome via Illumina Second Generation Sequencing
Source: PLoS One. 2011 Jun 22;6(6):e21220. doi: 10.1371/journal.pone.0021220 (PMC3120849; doi:10.1371/journal.pone.0021220)
Supplement: Table S2 — Taxus mairei Unigene sequence alignment with Picea glauca , Korea T. cuspidata , and China T. cuspidate. All clone sequences (Closeq) and cluster sequences (Cluseq) are retrieved from http://www.arborea.ulaval.ca/research/sequencing/gene_catalogue/index.html. Clone sequences are all in the direct orientation (5′->3′) and correspond to either ESTs, or assemblies of ESTs when clones produced several ESTs. There is a single clone sequence per clone, which contains its completion status in the FASTA header line. For each cluster, a representative clone is selected (usually the longest and most complete cDNA) to represent a gene. Thus, cluster sequences are nothing else than the clone sequence of their representative clones. QueryX, start position of Taxus mairei Unigene sequence that can be aligned with Picea glauca sequence (alignment parameters E value ≤1e-5 and the sequence identity ≥80%); QueryY, end position of T. mairei Unigene sequence; SbjctX, start position of P. glauca sequence that is aligned with T. mairei Unigene sequence; SbjctY, end position of P. glauca sequence; 5′ read (F), Unigene of T. mairei that can be aligned with 5′ CDS sequence of P. glauca in the forward orientation; 5′ read (R), Unigene of T. mairei that can be aligned with 5′ CDS sequence of P. glauca in the reverse orientation; 3′ read (F), Unigene of T. mairei that can be aligned with 3′ CDS sequence of P. glauca in the forward orientation; 3′ read (R), Unigene of T. mairei that can be aligned with 3′ CDS sequence of P. glauca in the reverse orientation; is CDS (F), Unigene of T. mairei that can be aligned with full length CDS sequence of P. glauca in the forward orientation; is CDS (R), Unigene of T. mairei that can be aligned with full length CDS sequence of P. glauca in the reverse orientation. Unigene of T. mairei that can be aligned with the internal (not 5′, 3′, or full length) CDS sequence of P. glauca is not annotated with the above six terms. (XLS) [file pone.0021220.s002.xls]

## Sheet: Sheet1
Table S2 Taxus mairei Unigene sequence alignment with Picea glauca, Korea T. cuspidata, and China T. cuspidata
Unigene of Taxus mairei	Clone sequence of Picea glauca											Cluster sequence(Unigene)of Picea glauca											Unigene of Korea Taxus cuspidata					Unigene of China Taxus cuspidata
	Sbjct Name	QueryX	QueryY	SbjctX	SbjctY	Overlap/total	CDS	E Value	Identity	Score	Annotation	Sbjct Name	QueryX	QueryY	SbjctX	SbjctY	Overlap/total	CDS	E Value	Identity	Score	Annotation	Sbjct Name	E Value	Identity	Score	Annotation	Sbjct Name	E Value	Identity	Score	Annotation
Unigene1_Taxus																							contig00418	6e-84	97	309	length=192 numreads=5
Unigene2_Taxus	GQ03233_H24.1	1	52	94	43	47/52		6e-09	90	63.9	clone=GQ03233_H24 cluster=GQ03233_H24 status=complete gb=BT111152	GQ03233_H24.1	1	52	94	43	47/52		1e-09	90	63.9	clone=GQ03233_H24 cluster=GQ03233_H24 status=complete gb=BT111152	contig04803	3e-25	83	115	length=1401 numreads=17	contig02765	3e-20	86	97.6	length=1944 numreads=16
Unigene3_Taxus																							contig35256	1e-75	95	281	length=244 numreads=11
Unigene4_Taxus	GQ03217_L20.1	459	1027	947	379	505/569		1e-176	88	620	clone=GQ03217_L20 cluster=GQ03217_L20 status=complete gb=BT110188	GQ03217_L20.1	459	1027	947	379	505/569		1e-177	88	620	clone=GQ03217_L20 cluster=GQ03217_L20 status=complete gb=BT110188	contig03889	0	99	1271	length=982 numreads=38	FXAT9O003DKH9U	1e-161	98	565
Unigene5_Taxus	GQ03221_G11.1	162	369	514	317	183/208		1e-57	87	224	clone=GQ03221_G11 cluster=GQ03719_E05 status=5												contig35162	1e-119	94	426	length=424 numreads=20
Unigene6_Taxus																							contig22004	6e-70	95	264	length=883 numreads=10	FXAT9O003CZPNE	1e-167	94	587
Unigene7_Taxus																							contig33700	1e-180	95	628	length=554 numreads=61	contig04951	1e-139	98	492	length=280 numreads=2
Unigene8_Taxus	GQ0192_M09.1	1111	1886	1	776	693/776	5' read(F)	0	89	880	clone=GQ0192_M09 cluster=GQ0192_M09 status=complete gb=BT102440	GQ0192_M09.1	1111	1886	1	776	693/776	5' read(F)	0	89	880	clone=GQ0192_M09 cluster=GQ0192_M09 status=complete gb=BT102440	contig15522	0	99	2252	length=2837 numreads=91	contig02856	0	98	1045	length=576 numreads=5
Unigene9_Taxus	WS02630_H12.1	347	414	259	192	64/68		4e-21	94	103	clone=WS02630_H12 cluster=GQ03232_N07 status=complete	GQ03232_N07.1	347	414	417	350	64/68		8e-22	94	103	clone=GQ03232_N07 cluster=GQ03232_N07 status=complete gb=BT111113	contig07854	0	99	777	length=2325 numreads=50
Unigene10_Taxus	GQ02804_K09.1	916	1640	47	771	615/725		1e-159	84	565	clone=GQ02804_K09 cluster=GQ02804_K09 status=complete gb=BT103957	GQ02804_K09.1	916	1640	47	771	615/725		1e-160	84	565	clone=GQ02804_K09 cluster=GQ02804_K09 status=complete gb=BT103957	contig29251	1e-117	97	420	length=244 numreads=2	FXAT9O003CVXQ9	0	97	799
Unigene11_Taxus	WS0349_H06.1	236	610	540	166	311/375		1e-60	82	236	clone=WS0349_H06 cluster=GQ03705_D22 status=complete	GQ03705_D22.1	236	610	640	266	310/375		5e-59	82	228	clone=GQ03705_D22 cluster=GQ03705_D22 status=complete gb=BT115732	contig04409	0	99	1267	length=781 numreads=49	FXAT9O003DPUCN	5e-90	89	329
Unigene12_Taxus	GQ0267_F02.1	396	477	517	436	71/82		2e-12	86	75.8	clone=GQ0267_F02 cluster=GQ0267_F02 status=complete gb=BT103647	GQ0267_F02.1	396	477	517	436	71/82		4e-13	86	75.8	clone=GQ0267_F02 cluster=GQ0267_F02 status=complete gb=BT103647	contig25512	0	96	678	length=442 numreads=5	FXAT9O003C72HY	1e-07	92	56
Unigene13_Taxus																							contig14818	4e-46	97	182	length=1644 numreads=32	contig07127	2e-46	96	182	length=380 numreads=2
Unigene14_Taxus																							contig15770	0	99	686	length=894 numreads=38
Unigene15_Taxus	GQ03816_I21.1	695	1475	962	182	649/782		1e-133	82	480	clone=GQ03816_I21 cluster=GQ03816_I21 status=complete gb=BT117291	GQ03816_I21.1	695	1475	962	182	649/782		1e-134	82	480	clone=GQ03816_I21 cluster=GQ03816_I21 status=complete gb=BT117291	contig21060	0	99	2979	length=1566 numreads=47	FXAT9O003DAT1K	0	98	708
Unigene16_Taxus
Unigene17_Taxus	GQ03809_I14.2	159	236	48	125	66/78		9e-08	84	60	clone=GQ03809_I14 cluster=GQ03809_I14 status=5	GQ03809_I14.2	159	236	48	125	66/78		2e-08	84	60	clone=GQ03809_I14 cluster=GQ03809_I14 status=5	contig11957	2e-08	80	60	length=238 numreads=3	contig07090	1e-06	92	52	length=390 numreads=3
Unigene18_Taxus	WS02617_P19.1	468	504	371	407	35/37		4e-07	94	58	clone=WS02617_P19 cluster=GQ03516_G20 status=complete												contig09749	3e-06	100	52	length=1050 numreads=33
Unigene19_Taxus																							contig08989	0	98	2014	length=1397 numreads=34	contig06876	0	98	670	length=362 numreads=3
Unigene20_Taxus																							contig13135	1e-112	98	402	length=486 numreads=8
Unigene21_Taxus
Unigene22_Taxus	WS02629_B10.1	376	449	248	321	68/74		1e-19	91	99.6	clone=WS02629_B10 cluster=GQ02801_J01 status=complete	GQ02801_J01.1	376	449	273	346	68/74		2e-20	91	99.6	clone=GQ02801_J01 cluster=GQ02801_J01 status=complete gb=BT103751	contig19589	0	98	1160	length=639 numreads=9
Unigene23_Taxus
Unigene24_Taxus																							contig16843	0	98	2878	length=1538 numreads=32	contig02231	0	98	3065	length=1633 numreads=24
Unigene25_Taxus
Unigene26_Taxus	GQ04011_B22.1	591	948	718	361	305/358		1e-76	85	289	clone=GQ04011_B22 cluster=GQ03123_K19 status=5	GQ03123_K19.1	592	948	867	511	301/357		1e-69	84	264	clone=GQ03123_K19 cluster=GQ03123_K19 status=complete gb=BT108568	contig01545	1e-164	95	579	length=1405 numreads=26
Unigene27_Taxus	GQ04010_D06.1	476	1791	83	1398	1128/1316		0	85	1118	clone=GQ04010_D06 cluster=GQ04010_D06 status=complete gb=BT118784	GQ04010_D06.1	476	1791	83	1398	1128/1316		0	85	1118	clone=GQ04010_D06 cluster=GQ04010_D06 status=complete gb=BT118784	contig14578	0	99	3035	length=1559 numreads=69	FXAT9O003DJKJ4	0	97	783
Unigene28_Taxus	GQ03216_M12.1	738	1236	734	236	448/499		1e-165	89	585	clone=GQ03216_M12 cluster=GQ03216_M12 status=complete gb=BT110132	GQ03216_M12.1	738	1236	734	236	448/499		1e-166	89	585	clone=GQ03216_M12 cluster=GQ03216_M12 status=complete gb=BT110132	contig22807	0	98	1306	length=1226 numreads=17	FXAT9O003DFU0H	0	96	779
Unigene29_Taxus																							contig02974	0	98	1066	length=1239 numreads=41	FXAT9O003C3KWQ	1e-77	83	287
Unigene30_Taxus	GQ04112_G11.1	190	406	666	456	185/217		2e-40	85	168	clone=GQ04112_G11 cluster=GQ02829_P24 status=5	GQ02829_P24.1	190	406	811	601	184/217		1e-38	84	161	clone=GQ02829_P24 cluster=GQ02829_P24 status=complete gb=BT105913	contig07999	0	98	1727	length=1282 numreads=41	contig01388	0	98	1943	length=1244 numreads=47
Unigene31_Taxus																							contig13408	2e-20	89	97.6	length=682 numreads=26
Unigene32_Taxus	GQ03714_F16.1	131	271	217	77	116/142		5e-08	81	60	clone=GQ03714_F16 cluster=GQ03710_H08 status=5												contig05575	9e-89	100	325	length=569 numreads=33	contig07425	1e-122	99	436	length=241 numreads=7
Unigene33_Taxus	GQ03233_J11.1	597	1022	506	934	357/429		2e-72	83	276	clone=GQ03233_J11 cluster=GQ03233_J11 status=complete gb=BT111159	GQ03233_J11.1	597	1022	506	934	357/429		5e-73	83	276	clone=GQ03233_J11 cluster=GQ03233_J11 status=complete gb=BT111159	contig19358	0	99	1941	length=1074 numreads=19
Unigene34_Taxus																							contig19259	4e-65	98	248	length=306 numreads=6
Unigene35_Taxus	GQ01301_I04.1	1	217	489	705	188/217		1e-50	86	200	clone=GQ01301_I04 cluster=GQ01301_I04 status=complete gb=BT101309	GQ01301_I04.1	1	217	489	705	188/217		2e-51	86	200	clone=GQ01301_I04 cluster=GQ01301_I04 status=complete gb=BT101309	contig20101	4e-65	95	246	length=927 numreads=34	contig02218	1e-103	96	371	length=1032 numreads=24
Unigene36_Taxus																							contig20217	1e-140	95	496	length=396 numreads=2	FXAT9O003C7B48	1e-41	94	167
Unigene37_Taxus																							contig09886	1e-118	97	424	length=455 numreads=15	FXAT9O003C4D44	3e-89	97	325
Unigene38_Taxus	WS00730_M04.1	284	664	587	210	318/381		1e-65	83	252	clone=WS00730_M04 cluster=GQ03203_M11 status=3	GQ03218_C17.2	284	664	359	736	318/381		2e-66	83	252	clone=GQ03218_C17 cluster=GQ03218_C17 status=complete gb=BT110211	contig23250	4e-95	96	347	length=204 numreads=3	contig07477	2e-23	82	107	length=810 numreads=758
Unigene39_Taxus	GQ02013_O12.1	160	787	102	729	545/628		1e-166	86	587	clone=GQ02013_O12 cluster=GQ03709_A19 status=3	GQ03709_A19.1	269	787	61	579	458/519		1e-154	88	545	clone=GQ03709_A19 cluster=GQ03709_A19 status=complete gb=BT115932	contig01113	0	99	1473	length=859 numreads=22	contig00047	0	92	811	length=987 numreads=7
Unigene40_Taxus	GQ02754_B04.1	1055	1745	31	721	564/691		1e-98	81	363	clone=GQ02754_B04 cluster=GQ03806_H09 status=5	GQ03806_H09.1	1076	1745	936	1604	546/670		1e-91	81	337	clone=GQ03806_H09 cluster=GQ03806_H09 status=complete gb=BT116774	contig04551	0	99	2056	length=1073 numreads=31	contig04730	5e-33	84	141	length=641 numreads=4
Unigene41_Taxus	GQ03507_M07.1	1487	1622	526	661	117/136		4e-25	86	119	clone=GQ03507_M07 cluster=GQ03121_A21 status=5	GQ03121_A21.1	1487	1622	634	769	117/136		8e-26	86	119	clone=GQ03121_A21 cluster=GQ03121_A21 status=5	contig32669	0	97	991	length=558 numreads=5	FXAT9O003C4U1X	0	98	896
Unigene42_Taxus																							contig04451	1e-125	96	444	length=1858 numreads=87
Unigene43_Taxus	GQ03516_B14.1	52	165	794	681	95/114		2e-12	83	75.8	clone=GQ03516_B14 cluster=GQ03516_B14 status=complete gb=BT114517	GQ03516_B14.1	52	165	794	681	95/114		3e-13	83	75.8	clone=GQ03516_B14 cluster=GQ03516_B14 status=complete gb=BT114517	contig20081	1e-144	91	509	length=589 numreads=20	FXAT9O003C7QR8	4e-22	91	103
Unigene44_Taxus	GQ04105_I13.1	151	209	85	27	51/59		7e-06	86	54	clone=GQ04105_I13 cluster=GQ04105_I13 status=complete gb=BT119427	GQ04105_I13.1	151	209	85	27	51/59		1e-06	86	54	clone=GQ04105_I13 cluster=GQ04105_I13 status=complete gb=BT119427
Unigene45_Taxus																							contig10786	1e-151	95	533	length=1224 numreads=37	FXAT9O003DFA3L	1e-134	94	474
Unigene46_Taxus																							contig02302	0	95	690	length=1346 numreads=51
Unigene47_Taxus																							contig07242	2e-89	99	327	length=393 numreads=10
Unigene48_Taxus	GQ03617_M11.1	880	1080	401	195	174/207		7e-35	84	151	clone=GQ03617_M11 cluster=GQ03617_M11 status=complete gb=BT115486	GQ03617_M11.1	880	1080	401	195	174/207		1e-35	84	151	clone=GQ03617_M11 cluster=GQ03617_M11 status=complete gb=BT115486	contig20873	0	98	1980	length=1635 numreads=55
Unigene49_Taxus
Unigene50_Taxus
Unigene51_Taxus	GQ0063_F12.2	432	778	1256	913	280/347		2e-35	80	153	clone=GQ0063_F12 cluster=GQ0063_F12 status=53	GQ0063_F12.2	432	778	1256	913	280/347		3e-36	80	153	clone=GQ0063_F12 cluster=GQ0063_F12 status=53	contig12928	0	99	1374	length=792 numreads=31
Unigene52_Taxus																							contig16700	0	98	722	length=384 numreads=55	contig03012	0	98	726	length=1235 numreads=14
Unigene53_Taxus																							contig30113	3e-23	95	109	length=387 numreads=2	FXAT9O003CYKQ5	0	95	680
Unigene54_Taxus	GQ03412_M17.1	277	892	210	825	514/616		1e-113	83	412	clone=GQ03412_M17 cluster=GQ03238_G19 status=5	GQ03238_G19.2	494	910	1	417	352/417	5' read(F)	6e-84	84	311	clone=GQ03238_G19 cluster=GQ03238_G19 status=complete gb=BT111488	contig01233	0	98	2440	length=1436 numreads=22	contig06991	0	98	729	length=392 numreads=2
Unigene55_Taxus	WS0324_K08.1	407	548	1	142	117/142	5' read(F)	5e-15	82	83.8	clone=WS0324_K08 cluster=WS0324_K08 status=3	WS0324_K08.1	407	548	1	142	117/142	5' read(F)	1e-15	82	83.8	clone=WS0324_K08 cluster=WS0324_K08 status=3	contig25078	1e-101	92	367	length=927 numreads=19
Unigene56_Taxus	GQ03516_F06.2	1	223	262	484	181/223		8e-23	81	109	clone=GQ03516_F06 cluster=GQ03516_F06 status=complete gb=BT114530	GQ03516_F06.2	1	223	262	484	181/223		1e-23	81	109	clone=GQ03516_F06 cluster=GQ03516_F06 status=complete gb=BT114530						contig01900	4e-06	84	50.1	length=1129 numreads=11
Unigene57_Taxus	GQ02807_A06.1	1012	1495	492	9	427/484	5' read(R)	1e-142	88	507	clone=GQ02807_A06 cluster=GQ02807_A06 status=complete gb=BT104156	GQ02807_A06.1	1012	1495	492	9	427/484	5' read(R)	1e-143	88	507	clone=GQ02807_A06 cluster=GQ02807_A06 status=complete gb=BT104156	contig25523	0	98	1405	length=1106 numreads=8	FXAT9O003CWM9O	0	99	874
Unigene58_Taxus	WS02633_A10.1	67	415	1	349	290/349	5' read(F)	2e-57	83	224	clone=WS02633_A10 cluster=WS02633_A10 status=3	WS02633_A10.1	67	415	1	349	290/349	5' read(F)	3e-58	83	224	clone=WS02633_A10 cluster=WS02633_A10 status=3	contig21402	0	99	791	length=1524 numreads=34	FXAT9O003C6ASC	6e-17	97	85.7
Unigene59_Taxus																							contig00946	0	96	1324	length=1226 numreads=41	contig00120	0	98	1265	length=684 numreads=7
Unigene60_Taxus	GQ03915_L04.1	1	494	232	725	425/494		1e-119	86	432	clone=GQ03915_L04 cluster=GQ03507_O20 status=5	GQ03507_O20.1	1	494	406	899	424/494		1e-118	85	424	clone=GQ03507_O20 cluster=GQ03507_O20 status=complete gb=BT114092	contig16358	0	99	1709	length=1241 numreads=50
Unigene61_Taxus
Unigene62_Taxus	GQ03711_G13.1	355	895	1837	1297	450/541		7e-95	83	351	clone=GQ03711_G13 cluster=GQ03711_G13 status=complete gb=BT116069	GQ03711_G13.1	355	895	1837	1297	450/541		1e-95	83	351	clone=GQ03711_G13 cluster=GQ03711_G13 status=complete gb=BT116069	contig20920	0	97	2234	length=1270 numreads=22	contig02230	0	97	1483	length=820 numreads=8
Unigene63_Taxus	GQ03810_F14.1	43	151	427	535	95/109		2e-21	87	105	clone=GQ03810_F14 cluster=GQ03310_B11 status=5	GQ03914_N10.2	43	151	311	419	94/109		7e-20	86	97.6	clone=GQ03914_N10 cluster=GQ03914_N10 status=complete gb=BT117861	contig09508	0	89	684	length=1706 numreads=36	contig04375	1e-137	91	484	length=724 numreads=5
Unigene64_Taxus
Unigene65_Taxus																							contig02555	2e-94	97	343	length=264 numreads=65	FXAT9O003C1IM1	2e-76	95	281
Unigene66_Taxus	GQ03401_K01.1	19	597	87	665	481/579		1e-101	83	371	clone=GQ03401_K01 cluster=GQ03401_K01 status=complete gb=BT113211	GQ03401_K01.1	19	597	87	665	481/579		1e-102	83	371	clone=GQ03401_K01 cluster=GQ03401_K01 status=complete gb=BT113211	contig06376	0	98	1162	length=1164 numreads=28	contig02689	0	98	1138	length=1205 numreads=18
Unigene67_Taxus	GQ0046_J07.1	654	1543	890	1	799/890	5' read(R)	0	89	1043	clone=GQ0046_J07 cluster=GQ03107_A08 status=53	GQ03107_A08.1	617	1231	615	1	556/615	5' read(R)	0	90	751	clone=GQ03107_A08 cluster=GQ03107_A08 status=complete gb=BT107395	contig11363	0	98	3620	length=1906 numreads=54	FXAT9O003DBTZY	0	97	839
Unigene68_Taxus	GQ0209_A10.1	245	591	422	76	286/347		2e-51	82	204	clone=GQ0209_A10 cluster=GQ03312_M14 status=complete	GQ03312_M14.1	245	591	884	541	284/347		4e-46	81	184	clone=GQ03312_M14 cluster=GQ03312_M14 status=complete gb=BT112267	contig24430	1e-143	98	505	length=565 numreads=17
Unigene69_Taxus	GQ03326_H15.1	377	571	942	748	166/195		4e-37	85	157	clone=GQ03326_H15 cluster=GQ03326_H15 status=complete gb=BT113158	GQ03326_H15.1	377	571	942	748	166/195		8e-38	85	157	clone=GQ03326_H15 cluster=GQ03326_H15 status=complete gb=BT113158	contig35480	0	98	961	length=773 numreads=49
Unigene70_Taxus	WS0074_O01.1	1	347	119	465	286/347		2e-51	82	204	clone=WS0074_O01 cluster=GQ03312_C15 status=3	GQ03312_C15.2	1	347	950	1296	284/347		2e-47	81	188	clone=GQ03312_C15 cluster=GQ03312_C15 status=complete gb=BT112217	contig07785	0	98	785	length=1104 numreads=50
Unigene71_Taxus	GQ03602_A10.1	86	334	161	409	219/249		1e-66	87	256	clone=GQ03602_A10 cluster=GQ04102_M18 status=complete	GQ04102_M18.1	86	334	325	572	217/249		3e-60	87	232	clone=GQ04102_M18 cluster=GQ04102_M18 status=complete gb=BT119222	contig11665	0	98	1172	length=1026 numreads=78	FXAT9O003DPRV2	8e-27	81	119
Unigene72_Taxus																							contig04404	1e-55	100	214	length=1209 numreads=19	contig06594	1e-102	96	367	length=317 numreads=2
Unigene73_Taxus																							contig34645	0	90	739	length=845 numreads=26	contig00566	2e-79	97	293	length=1097 numreads=8
Unigene74_Taxus	GQ03115_K06.1	743	1131	392	1	340/392	5' read(R)	5e-98	86	361	clone=GQ03115_K06 cluster=GQ03115_K06 status=5	GQ03115_K06.1	743	1131	392	1	340/392	5' read(R)	1e-98	86	361	clone=GQ03115_K06 cluster=GQ03115_K06 status=5	contig16381	0	98	1433	length=1133 numreads=17	contig02228	0	98	1526	length=822 numreads=6
Unigene75_Taxus																							contig02670	1e-106	97	381	length=1410 numreads=91
Unigene76_Taxus	GQ03715_N02.1	90	248	436	594	138/159		6e-35	86	149	clone=GQ03715_N02 cluster=GQ03715_N02 status=complete gb=BT116307	GQ03715_N02.1	90	248	436	594	138/159		1e-35	86	149	clone=GQ03715_N02 cluster=GQ03715_N02 status=complete gb=BT116307	contig33487	3e-82	96	303	length=209 numreads=122
Unigene77_Taxus	GQ03322_P21.4	5	99	1052	1146	79/95		1e-08	83	61.9	clone=GQ03322_P21 cluster=GQ03322_P21 status=complete gb=BT112939	GQ03322_P21.4	5	99	1052	1146	79/95		2e-09	83	61.9	clone=GQ03322_P21 cluster=GQ03322_P21 status=complete gb=BT112939						FXAT9O003DAVRT	7e-28	97	121
Unigene78_Taxus																							contig08222	0	96	741	length=554 numreads=12	FXAT9O003C6FON	1e-122	96	436
Unigene79_Taxus	GQ01303_K06.1	1	217	4	220	187/217	5' read(F)	3e-48	86	192	clone=GQ01303_K06 cluster=GQ03718_M10 status=5	GQ03718_M10.1	1	217	1010	1226	186/217		1e-46	85	184	clone=GQ03718_M10 cluster=GQ03718_M10 status=complete gb=BT116442	contig32399	1e-113	99	406	length=1831 numreads=39
Unigene80_Taxus	GQ04106_I15.1	375	409	341	307	33/35		5e-06	94	54	clone=GQ04106_I15 cluster=GQ03514_I12 status=5	GQ03514_I12.4	375	409	1388	1354	33/35		1e-06	94	54	clone=GQ03514_I12 cluster=GQ03514_I12 status=complete gb=BT114442	contig35222	0	98	860	length=537 numreads=19	FXAT9O003CXVGV	2e-42	86	170
Unigene81_Taxus	GQ0201_E08.1	327	506	562	383	146/180		4e-16	81	87.7	clone=GQ0201_E08 cluster=GQ03613_F15 status=53	GQ03613_F15.1	327	458	843	712	109/132		2e-14	82	79.8	clone=GQ03613_F15 cluster=GQ03613_F15 status=complete gb=BT115282	contig01367	0	95	1084	length=1598 numreads=78	FXAT9O003DIZ2M	0	96	763
Unigene82_Taxus	GQ03319_P21.1	1	257	474	218	230/257		3e-79	89	295	clone=GQ03319_P21 cluster=GQ03002_K05 status=5	GQ03002_K05.1	1	257	962	706	230/257		6e-80	89	295	clone=GQ03002_K05 cluster=GQ03002_K05 status=complete gb=BT106481	contig06919	1e-139	99	494	length=706 numreads=61	FXAT9O003DDO4L	8e-86	97	313
Unigene83_Taxus																							contig30167	4e-53	98	206	length=627 numreads=8
Unigene84_Taxus	GQ0256_N07.1	287	314	39	12	28/28		7e-07	100	56	clone=GQ0256_N07 cluster=GQ0256_N07 status=complete gb=BT103558	GQ0256_N07.1	287	314	39	12	28/28		1e-07	100	56	clone=GQ0256_N07 cluster=GQ0256_N07 status=complete gb=BT103558	contig14432	5e-93	96	339	length=2257 numreads=68	contig00200	9e-77	92	283	length=504 numreads=25
Unigene85_Taxus																							contig03135	7e-39	93	159	length=1715 numreads=26
Unigene86_Taxus																							contig15645	1e-89	92	327	length=1239 numreads=41
Unigene87_Taxus																							contig04683	0	97	759	length=1952 numreads=112	FXAT9O003C6JDR	1e-77	97	287
Unigene88_Taxus
Unigene89_Taxus	GQ04112_D21.2	56	150	854	760	81/95		4e-13	85	77.8	clone=GQ04112_D21 cluster=GQ04112_D21 status=complete gb=BT119911	GQ04112_D21.2	56	150	854	760	81/95		8e-14	85	77.8	clone=GQ04112_D21 cluster=GQ04112_D21 status=complete gb=BT119911
Unigene90_Taxus	WS0314_P15.1	99	268	278	447	144/171		4e-23	84	109	clone=WS0314_P15 cluster=GQ04010_M11 status=3	GQ04010_M11.1	155	268	806	919	99/114		3e-23	86	107	clone=GQ04010_M11 cluster=GQ04010_M11 status=complete gb=BT118833	contig14088	1e-142	98	502	length=1088 numreads=38
Unigene91_Taxus	GQ03808_H23.1	318	1278	1404	449	835/961		0	86	906	clone=GQ03808_H23 cluster=GQ03808_H23 status=complete gb=BT116880	GQ03808_H23.1	318	1278	1404	449	835/961		0	86	906	clone=GQ03808_H23 cluster=GQ03808_H23 status=complete gb=BT116880	contig12147	0	98	2066	length=1243 numreads=14	FXAT9O003DM5RO	0	96	700
Unigene92_Taxus	GQ04013_N21.1	407	588	442	623	150/183		2e-15	81	85.7	clone=GQ04013_N21 cluster=GQ03701_M18 status=5	GQ03701_M18.1	407	588	445	626	150/183		3e-16	81	85.7	clone=GQ03701_M18 cluster=GQ03701_M18 status=complete gb=BT115571
Unigene93_Taxus	GQ0036_E15.1	308	721	183	596	356/414		4e-98	85	361	clone=GQ0036_E15 cluster=GQ0036_E15 status=complete gb=BT100662	GQ0036_E15.1	308	721	183	596	356/414		7e-99	85	361	clone=GQ0036_E15 cluster=GQ0036_E15 status=complete gb=BT100662	contig05256	0	98	1013	length=637 numreads=12
Unigene94_Taxus																							contig22555	1e-111	95	402	length=1263 numreads=11
Unigene95_Taxus	GQ0255_I19.1	552	1638	1130	44	922/1087		0	84	846	clone=GQ0255_I19 cluster=GQ0255_I19 status=complete gb=BT103499	GQ0255_I19.1	552	1638	1130	44	922/1087		0	84	846	clone=GQ0255_I19 cluster=GQ0255_I19 status=complete gb=BT103499	contig10412	0	99	3840	length=2045 numreads=74	contig05205	0	99	924	length=474 numreads=3
Unigene96_Taxus	GQ02908_O19.1	260	410	14	164	141/151		3e-56	93	220	clone=GQ02908_O19 cluster=GQ02820_M22 status=complete	GQ02820_M22.1	260	410	255	405	141/151		5e-57	93	220	clone=GQ02820_M22 cluster=GQ02820_M22 status=complete gb=BT105313	contig12357	1e-179	98	624	length=836 numreads=30	contig06210	5e-85	95	311	length=333 numreads=2
Unigene97_Taxus	GQ03913_M11.2	408	1570	285	1447	1011/1163		0	86	1100	clone=GQ03913_M11 cluster=GQ03913_M11 status=complete gb=BT117831	GQ03913_M11.2	408	1570	285	1447	1011/1163		0	86	1100	clone=GQ03913_M11 cluster=GQ03913_M11 status=complete gb=BT117831	contig34526	0	92	1628	length=1784 numreads=59	FXAT9O003DQYNN	1e-156	93	551
Unigene98_Taxus																							contig01072	0	91	981	length=1722 numreads=32	FXAT9O003DOUNN	0	98	726
Unigene99_Taxus																							contig15577	0	97	1082	length=2335 numreads=61
Unigene100_Taxus																							contig04204	1e-122	99	436	length=1674 numreads=66	FXAT9O003DLAAL	3e-26	100	115
Unigene101_Taxus																												contig02372	1e-127	98	450	length=552 numreads=8
Unigene102_Taxus	GQ03321_K18.1	275	549	275	549	232/275		3e-51	84	204	clone=GQ03321_K18 cluster=GQ03517_K05 status=complete	GQ03517_K05.1	275	549	190	465	231/276		2e-45	83	182	clone=GQ03517_K05 cluster=GQ03517_K05 status=complete gb=BT114595	contig09018	0	97	1237	length=861 numreads=37	contig03160	0	98	1253	length=798 numreads=9
Unigene103_Taxus																							contig14002	2e-28	93	125	length=923 numreads=53
Unigene104_Taxus	GQ03816_N06.1	444	926	227	709	414/483		1e-113	85	410	clone=GQ03816_N06 cluster=GQ03216_A20 status=5	GQ03216_A20.2	444	926	227	708	415/483		1e-114	85	410	clone=GQ03216_A20 cluster=GQ03216_A20 status=complete gb=BT110085	contig19817	0	98	1768	length=1101 numreads=16	contig03844	0	99	1007	length=575 numreads=5
Unigene105_Taxus
Unigene106_Taxus	WS02621_E11.1	405	642	264	27	203/238		2e-48	85	194	clone=WS02621_E11 cluster=GQ02820_E23 status=complete	GQ02820_E23.3	405	642	1379	1142	202/238		1e-46	84	186	clone=GQ02820_E23 cluster=GQ02820_E23 status=complete gb=BT105260	contig09528	0	98	957	length=527 numreads=15
Unigene107_Taxus	GQ03125_E21.1	1003	1834	41	872	733/832		0	88	864	clone=GQ03125_E21 cluster=GQ03125_E21 status=complete gb=BT108680	GQ03125_E21.1	1003	1834	41	872	733/832		0	88	864	clone=GQ03125_E21 cluster=GQ03125_E21 status=complete gb=BT108680	contig12301	0	98	3848	length=2047 numreads=30	contig03597	0	98	1459	length=796 numreads=7
Unigene108_Taxus	WS03226_F04.1	542	607	118	53	58/66		9e-10	87	67.9	clone=WS03226_F04 cluster=WS03226_F04 status=3	WS03226_F04.1	542	607	118	53	58/66		2e-10	87	67.9	clone=WS03226_F04 cluster=WS03226_F04 status=3
Unigene109_Taxus	WS0338_D02.1	95	169	129	55	65/75		5e-11	86	69.9	clone=WS0338_D02 cluster=GQ03323_F24 status=complete	GQ03323_F24.2	95	169	131	57	64/75		2e-09	85	61.9	clone=GQ03323_F24 cluster=GQ03323_F24 status=complete gb=BT112962	contig35816	5e-78	97	289	length=173 numreads=31	FXAT9O003DMGUM	7e-90	97	327
Unigene110_Taxus	WS00722_I04.1	142	369	147	374	188/228		2e-30	82	135	clone=WS00722_I04 cluster=GQ03402_A23 status=3	GQ03418_P13.1	157	369	1103	1315	175/213		7e-27	82	121	clone=GQ03418_P13 cluster=GQ03418_P13 status=complete gb=BT113743	contig03327	0	95	1124	length=2054 numreads=28	contig01211	5e-25	80	113	length=606 numreads=12
Unigene111_Taxus																							contig08271	1e-113	98	408	length=1475 numreads=24	contig02849	1e-92	89	337	length=365 numreads=2
Unigene112_Taxus	GQ03519_A21.4	1	1015	35	1049	873/1015		0	86	886	clone=GQ03519_A21 cluster=GQ03519_A21 status=complete gb=BT114667	GQ03519_A21.4	1	1015	35	1049	873/1015		0	86	886	clone=GQ03519_A21 cluster=GQ03519_A21 status=complete gb=BT114667	contig12306	0	92	1134	length=1552 numreads=59	contig02412	0	93	1094	length=769 numreads=5
Unigene113_Taxus																							contig29971	0	97	983	length=643 numreads=24
Unigene114_Taxus																							contig25291	0	98	652	length=463 numreads=4
Unigene115_Taxus	GQ03506_K10.1	132	162	539	569	30/31		4e-06	96	54	clone=GQ03506_K10 cluster=GQ03506_K10 status=complete gb=BT114024	GQ03506_K10.1	132	162	539	569	30/31		8e-07	96	54	clone=GQ03506_K10 cluster=GQ03506_K10 status=complete gb=BT114024	contig01122	0	97	694	length=572 numreads=16	FXAT9O003DD4JG	2e-11	97	67.9
Unigene116_Taxus	GQ03123_O23.1	9	726	17	734	636/718		0	88	773	clone=GQ03123_O23 cluster=GQ03123_O23 status=complete gb=BT108589	GQ03123_O23.1	9	726	17	734	636/718		0	88	773	clone=GQ03123_O23 cluster=GQ03123_O23 status=complete gb=BT108589	contig02336	0	99	1021	length=535 numreads=70	FXAT9O003DJC5C	5e-69	99	260
Unigene117_Taxus																							contig02560	0	98	904	length=2053 numreads=98
Unigene118_Taxus	GQ01310_L22.1	363	946	704	121	475/584		1e-77	81	293	clone=GQ01310_L22 cluster=GQ04003_I01 status=5	GQ04003_I01.1	363	946	1285	702	474/584		4e-76	81	285	clone=GQ04003_I01 cluster=GQ04003_I01 status=complete gb=BT118198	contig12403	0	99	3120	length=1653 numreads=49	contig06169	4e-09	83	61.9	length=322 numreads=3
Unigene119_Taxus	WS02623_M02.1	344	392	64	16	44/49		2e-07	89	58	clone=WS02623_M02 cluster=GQ02818_M15 status=complete	GQ02818_M15.1	344	392	517	469	44/49		5e-08	89	58	clone=GQ02818_M15 cluster=GQ02818_M15 status=complete gb=BT105119	contig33395	4e-88	93	323	length=659 numreads=33	contig02941	1e-21	90	101	length=425 numreads=7
Unigene120_Taxus																							contig15032	8e-08	96	58	length=2155 numreads=59	FXAT9O003C4FPC	2e-06	96	52
Unigene121_Taxus																							contig05620	0	94	743	length=944 numreads=25	contig02930	1e-115	95	410	length=386 numreads=3
Unigene122_Taxus	WS0083_C14.1	1250	1463	7	220	180/214	5' read(F)	7e-36	84	155	clone=WS0083_C14 cluster=GQ02016_D19 status=3	GQ02016_D19.1	1250	1463	246	459	180/214		1e-36	84	155	clone=GQ02016_D19 cluster=GQ02016_D19 status=3	contig18135	0	98	1483	length=795 numreads=17
Unigene123_Taxus	WS02623_P16.1	148	260	61	173	96/113		4e-17	84	89.7	clone=WS02623_P16 cluster=GQ03701_I12 status=complete	GQ03701_I12.1	148	260	581	693	96/113		8e-18	84	89.7	clone=GQ03701_I12 cluster=GQ03701_I12 status=complete gb=BT115553	contig29809	1e-145	96	513	length=1595 numreads=55
Unigene124_Taxus	WS0262_I05.1	23	174	80	228	130/152		5e-27	85	123	clone=WS0262_I05 cluster=GQ03706_G19 status=complete	GQ03706_G19.1	23	174	45	193	128/152		5e-23	84	107	clone=GQ03706_G19 cluster=GQ03706_G19 status=complete gb=BT115800	contig22885	0	97	799	length=721 numreads=21
Unigene125_Taxus	GQ03106_K06.1	1	515	579	65	448/515		1e-137	86	490	clone=GQ03106_K06 cluster=GQ02819_G01 status=complete	GQ02819_G01.2	1	515	1033	519	446/515		1e-133	86	474	clone=GQ02819_G01 cluster=GQ02819_G01 status=complete gb=BT105173	contig09920	0	98	1538	length=858 numreads=32	contig02697	1e-107	90	387	length=384 numreads=3
Unigene126_Taxus	GQ00410_D11.1	4	224	651	871	188/221		5e-43	85	176	clone=GQ00410_D11 cluster=GQ00410_D11 status=53	GQ00410_D11.1	4	224	651	871	188/221		9e-44	85	176	clone=GQ00410_D11 cluster=GQ00410_D11 status=53	contig35317	1e-127	91	452	length=515 numreads=25
Unigene127_Taxus																							contig09257	6e-15	100	79.8	length=1416 numreads=52
Unigene128_Taxus	GQ03319_K16.1	1267	1422	6	161	126/156	5' read(F)	5e-11	80	71.9	clone=GQ03319_K16 cluster=GQ03319_K16 status=complete gb=BT112698	GQ03319_K16.1	1267	1422	6	161	126/156	5' read(F)	1e-11	80	71.9	clone=GQ03319_K16 cluster=GQ03319_K16 status=complete gb=BT112698	contig00122	0	98	2317	length=2375 numreads=50	FXAT9O003DCTIN	0	98	906
Unigene129_Taxus												GQ03213_O10.3	148	212	183	247	55/65		5e-06	84	50.1	clone=GQ03213_O10 cluster=GQ03213_O10 status=complete gb=BT109935	contig03524	1e-115	97	412	length=1408 numreads=76	FXAT9O003DM7NO	4e-32	98	135
Unigene130_Taxus	GQ03312_M14.1	111	154	302	259	41/44		7e-09	93	63.9	clone=GQ03312_M14 cluster=GQ03312_M14 status=complete gb=BT112267	GQ03312_M14.1	111	154	302	259	41/44		1e-09	93	63.9	clone=GQ03312_M14 cluster=GQ03312_M14 status=complete gb=BT112267	contig01066	0	93	940	length=1959 numreads=37
Unigene131_Taxus	GQ03719_O16.1	454	1805	489	1840	1205/1352		0	89	1515	clone=GQ03719_O16 cluster=GQ03719_O16 status=complete gb=BT116503	GQ03719_O16.1	454	1805	489	1840	1205/1352		0	89	1515	clone=GQ03719_O16 cluster=GQ03719_O16 status=complete gb=BT116503	contig02941	0	99	3340	length=1819 numreads=110
Unigene132_Taxus																							contig11223	1e-126	98	450	length=1241 numreads=59	contig00218	6e-71	98	264	length=969 numreads=39
Unigene133_Taxus
Unigene134_Taxus																							contig12558	2e-31	94	135	length=688 numreads=11
Unigene135_Taxus	WS0322_M17.1	133	330	541	344	168/198		1e-35	84	155	clone=WS0322_M17 cluster=GQ03103_O01 status=3	GQ03103_O01.1	133	330	865	668	167/198		5e-34	84	147	clone=GQ03103_O01 cluster=GQ03103_O01 status=complete gb=BT107179	contig17735	0	98	2072	length=1475 numreads=27	FXAT9O003DQQDE	0	97	686
Unigene136_Taxus
Unigene137_Taxus	WS00735_F13.1	520	858	587	252	272/339		1e-30	80	137	clone=WS00735_F13 cluster=GQ03216_F14 status=3	GQ03216_F14.1	530	858	811	486	264/329		3e-30	80	133	clone=GQ03216_F14 cluster=GQ03216_F14 status=complete gb=BT110101	contig04504	0	98	2724	length=1524 numreads=59	contig01318	0	97	783	length=442 numreads=2
Unigene138_Taxus	GQ04108_N16.1	122	1069	1350	403	810/948		0	85	785	clone=GQ04108_N16 cluster=GQ04108_N16 status=complete gb=BT119693	GQ04108_N16.1	122	1069	1350	403	810/948		0	85	785	clone=GQ04108_N16 cluster=GQ04108_N16 status=complete gb=BT119693	contig29979	0	97	1057	length=593 numreads=15	contig02086	0	93	1459	length=1451 numreads=29
Unigene139_Taxus	GQ0193_P18.1	228	385	221	64	131/159		2e-13	82	77.8	clone=GQ0193_P18 cluster=GQ0193_P18 status=complete gb=BT102462	GQ0193_P18.1	228	385	221	64	131/159		4e-14	82	77.8	clone=GQ0193_P18 cluster=GQ0193_P18 status=complete gb=BT102462	contig00114	1e-177	95	618	length=1156 numreads=35	contig01626	7e-10	89	61.9	length=1542 numreads=14
Unigene140_Taxus	GQ04006_L09.1	765	831	338	272	58/67		3e-08	86	61.9	clone=GQ04006_L09 cluster=GQ03219_C22 status=complete	GQ03219_C22.1	765	831	511	445	58/67		6e-09	86	61.9	clone=GQ03219_C22 cluster=GQ03219_C22 status=complete gb=BT110284	contig34387	0	96	638	length=378 numreads=14	contig02051	3e-36	85	151	length=485 numreads=4
Unigene141_Taxus																							contig15413	1e-130	97	464	length=1231 numreads=60	contig06272	1e-135	97	478	length=478 numreads=4
Unigene142_Taxus																							contig03989	0	98	1721	length=929 numreads=38	FXAT9O003DOEUR	1e-149	96	527
Unigene143_Taxus																							contig04451	0	98	636	length=1858 numreads=87
Unigene144_Taxus																							contig12533	0	97	904	length=504 numreads=2	contig03627	0	98	670	length=375 numreads=2
Unigene145_Taxus																							contig10472	2e-06	100	52	length=1021 numreads=23	FXAT9O003DMOG2	6e-44	98	174
Unigene146_Taxus	GQ0049_P21.1	376	473	101	4	88/98	5' read(R)	3e-24	89	115	clone=GQ0049_P21 cluster=GQ0049_P21 status=53	GQ0049_P21.1	376	473	101	4	88/98	5' read(R)	6e-25	89	115	clone=GQ0049_P21 cluster=GQ0049_P21 status=53	contig07796	0	96	805	length=494 numreads=14	FXAT9O003DNKDF	1e-142	97	504
Unigene147_Taxus	WS00837_M04.1	571	598	53	80	28/28		2e-06	100	56	clone=WS00837_M04 cluster=GQ04008_F14 status=complete	GQ04005_O10.1	570	596	580	606	27/27		1e-06	100	54	clone=GQ04005_O10 cluster=GQ04005_O10 status=complete gb=BT118391	contig14866	0	98	1100	length=1564 numreads=29	FXAT9O003CXJI0	9e-08	100	56
Unigene148_Taxus	WS0075_G01.2	310	439	19	148	114/130		2e-29	87	131	clone=WS0075_G01 cluster=WS0075_G01 status=complete	WS0075_G01.2	310	439	19	148	114/130		4e-30	87	131	clone=WS0075_G01 cluster=WS0075_G01 status=complete	contig35759	0	96	753	length=1728 numreads=87	contig01718	1e-112	97	400	length=407 numreads=2
Unigene149_Taxus	GQ04005_L19.1	655	715	240	180	53/61		4e-07	86	58	clone=GQ04005_L19 cluster=GQ03224_L18 status=complete	GQ03224_L18.1	655	715	284	224	53/61		8e-08	86	58	clone=GQ03224_L18 cluster=GQ03224_L18 status=complete gb=BT110637						FXAT9O003CV82J	5e-28	97	123
Unigene150_Taxus																												contig00112	0	99	1152	length=604 numreads=4
Unigene151_Taxus
Unigene152_Taxus																							contig24636	1e-176	97	618	length=522 numreads=4	FXAT9O003CZUNI	4e-35	86	147
Unigene153_Taxus																												contig02752	0	97	664	length=507 numreads=3
Unigene154_Taxus	GQ0202_N02.1	606	713	588	695	92/108		1e-15	85	87.7	clone=GQ0202_N02 cluster=GQ0202_N02 status=5	GQ0202_N02.1	606	713	588	695	92/108		2e-16	85	87.7	clone=GQ0202_N02 cluster=GQ0202_N02 status=5	contig03302	0	98	1378	length=760 numreads=62	contig00472	1e-172	85	605	length=1838 numreads=29
Unigene155_Taxus	GQ03412_H22.1	249	358	116	7	98/110	5' read(R)	5e-27	89	123	clone=GQ03412_H22 cluster=GQ02817_A04 status=5	GQ02817_A04.3	249	358	346	237	98/110		9e-28	89	123	clone=GQ02817_A04 cluster=GQ02817_A04 status=complete gb=BT104956	contig08571	4e-54	99	210	length=2495 numreads=80
Unigene156_Taxus	GQ04110_J06.1	16	336	342	22	284/321		5e-93	88	343	clone=GQ04110_J06 cluster=GQ02820_J08 status=5	GQ02820_J08.2	16	249	687	454	207/234		1e-65	88	250	clone=GQ02820_J08 cluster=GQ02820_J08 status=complete gb=BT105291	contig17763	0	97	1532	length=1621 numreads=58	contig02499	0	98	1176	length=1165 numreads=5
Unigene157_Taxus																							contig25620	2e-22	89	105	length=765 numreads=11
Unigene158_Taxus																							contig00473	1e-111	97	400	length=238 numreads=12	contig03997	1e-63	99	240	length=335 numreads=2
Unigene159_Taxus	GQ03507_A06.1	34	904	1208	335	736/874		1e-180	84	634	clone=GQ03507_A06 cluster=GQ03507_A06 status=complete gb=BT114047	GQ03507_A06.1	34	904	1208	335	736/874		0	84	634	clone=GQ03507_A06 cluster=GQ03507_A06 status=complete gb=BT114047	contig02269	0	99	1762	length=2033 numreads=72	contig01757	0	99	1723	length=1671 numreads=21
Unigene160_Taxus																							contig02879	6e-96	91	349	length=943 numreads=19	FXAT9O003CVW07	8e-93	94	337
Unigene161_Taxus	GQ04010_A20.1	96	792	804	108	584/697		1e-136	83	486	clone=GQ04010_A20 cluster=GQ04010_A20 status=complete gb=BT118771	GQ04010_A20.1	96	792	804	108	584/697		1e-136	83	486	clone=GQ04010_A20 cluster=GQ04010_A20 status=complete gb=BT118771	contig33014	0	98	1076	length=569 numreads=42	contig06240	1e-146	92	515	length=398 numreads=3
Unigene162_Taxus
Unigene163_Taxus																							contig22538	1e-96	95	351	length=483 numreads=5
Unigene164_Taxus	GQ03317_F09.1	709	1312	863	260	542/604		0	89	706	clone=GQ03317_F09 cluster=GQ03106_A10 status=5	GQ03106_A10.1	709	1312	869	266	541/604		0	89	698	clone=GQ03106_A10 cluster=GQ03106_A10 status=complete gb=BT107343	contig04225	0	99	2426	length=1271 numreads=298	contig01520	0	98	1160	length=621 numreads=5
Unigene165_Taxus																							contig16135	0	97	904	length=1819 numreads=40
Unigene166_Taxus																							contig03148	6e-86	96	315	length=530 numreads=9
Unigene167_Taxus	WS00740_L08.1	215	443	48	276	208/229		1e-76	90	287	clone=WS00740_L08 cluster=GQ03212_C01 status=3	GQ03607_G12.1	198	432	541	775	211/235		1e-73	89	276	clone=GQ03607_G12 cluster=GQ03607_G12 status=complete gb=BT115020	contig33305	1e-104	94	377	length=949 numreads=103	contig02938	1e-104	94	377	length=1151 numreads=15
Unigene168_Taxus
Unigene169_Taxus																							contig02636	0	98	753	length=1380 numreads=48
Unigene170_Taxus	GQ04112_D01.1	2	248	334	88	200/247		4e-25	80	117	clone=GQ04112_D01 cluster=GQ04001_P11 status=5	GQ04001_P11.1	2	248	680	434	199/247		2e-23	80	109	clone=GQ04001_P11 cluster=GQ04001_P11 status=complete gb=BT118067	contig21256	0	99	852	length=1129 numreads=76	contig05601	1e-155	98	545	length=453 numreads=4
Unigene171_Taxus																							contig33888	0	99	771	length=1910 numreads=121	contig00986	0	98	704	length=1256 numreads=13
Unigene172_Taxus	WS0084_I04.1	1	224	308	85	195/224		2e-54	87	214	clone=WS0084_I04 cluster=GQ03207_J03 status=3	GQ03207_J03.2	1	117	1373	1257	106/117		4e-34	90	145	clone=GQ03207_J03 cluster=GQ03207_J03 status=complete gb=BT109357	contig32061	0	98	1176	length=1059 numreads=84	contig01692	0	98	926	length=902 numreads=5
Unigene173_Taxus	WS03221_J05.1	1	341	239	579	312/341		1e-124	91	446	clone=WS03221_J05 cluster=GQ03711_D23 status=3	GQ03711_D23.1	1	341	698	358	312/341		1e-125	91	446	clone=GQ03711_D23 cluster=GQ03711_D23 status=complete gb=BT116059	contig08308	0	99	652	length=1846 numreads=36	contig00909	1e-146	94	513	length=1579 numreads=13
Unigene174_Taxus
Unigene175_Taxus																							contig03923	0	97	767	length=1075 numreads=11
Unigene176_Taxus	GQ03919_J21.2	844	1741	97	994	782/898		0	87	860	clone=GQ03919_J21 cluster=GQ03919_J21 status=complete gb=BT117986	GQ03919_J21.2	844	1741	97	994	782/898		0	87	860	clone=GQ03919_J21 cluster=GQ03919_J21 status=complete gb=BT117986	contig09563	0	99	3384	length=2113 numreads=94	contig03271	0	99	1624	length=827 numreads=6
Unigene177_Taxus																												FXAT9O003DK77Q	2e-43	93	172
Unigene178_Taxus																							contig26004	1e-119	92	426	length=319 numreads=2
Unigene179_Taxus	GQ03106_C18.1	29	84	486	541	51/56		3e-11	91	71.9	clone=GQ03106_C18 cluster=GQ03315_J08 status=53	GQ03227_I17.1	656	743	1	88	74/88	5' read(F)	1e-09	84	63.9	clone=GQ03227_I17 cluster=GQ03227_I17 status=complete gb=BT110762	contig19740	1e-145	89	513	length=681 numreads=28	contig04564	1e-112	94	402	length=643 numreads=4
Unigene180_Taxus	GQ02826_P07.1	727	1727	55	1053	848/1001		0	84	755	clone=GQ02826_P07 cluster=GQ02826_P07 status=complete gb=BT105717	GQ02826_P07.1	727	1727	55	1053	848/1001		0	84	755	clone=GQ02826_P07 cluster=GQ02826_P07 status=complete gb=BT105717	contig04777	0	99	3443	length=1984 numreads=54	contig06437	0	99	839	length=438 numreads=2
Unigene181_Taxus	GQ03915_K05.2	49	269	315	95	187/221		1e-40	84	168	clone=GQ03915_K05 cluster=GQ03915_K05 status=complete gb=BT117879	GQ03915_K05.2	49	269	315	95	187/221		2e-41	84	168	clone=GQ03915_K05 cluster=GQ03915_K05 status=complete gb=BT117879	contig17670	0	98	799	length=1533 numreads=37	contig02766	0	98	728	length=1461 numreads=16
Unigene182_Taxus																							contig02985	2e-96	90	351	length=330 numreads=11
Unigene183_Taxus	GQ04012_L19.1	1044	2250	1487	281	1005/1207		0	83	791	clone=GQ04012_L19 cluster=GQ04012_L19 status=complete gb=BT118971	GQ04012_L19.1	1044	2250	1487	281	1005/1207		0	83	791	clone=GQ04012_L19 cluster=GQ04012_L19 status=complete gb=BT118971	contig14964	0	98	1713	length=914 numreads=28	FXAT9O003C8UQO	0	99	969
Unigene184_Taxus	GQ03228_A19.1	1950	2191	366	607	209/242		6e-55	86	218	clone=GQ03228_A19 cluster=GQ02902_P22 status=5	GQ02902_P22.2	1953	2191	1258	1496	206/239		7e-54	86	212	clone=GQ02902_P22 cluster=GQ02902_P22 status=complete gb=BT106102	contig09410	0	98	2565	length=1870 numreads=55	contig03227	0	99	2066	length=1086 numreads=11
Unigene185_Taxus
Unigene186_Taxus	GQ02771_A08.1	1269	1764	564	69	421/496		1e-106	84	389	clone=GQ02771_A08 cluster=GQ00411_I16 status=5	GQ00411_I16.1	1269	1764	578	83	421/496		1e-106	84	389	clone=GQ00411_I16 cluster=GQ00411_I16 status=complete gb=BT100701	contig04839	0	99	2111	length=1757 numreads=19	FXAT9O003C2FYW	2e-31	91	137
Unigene187_Taxus	GQ03703_C11.1	617	1564	1557	609	802/949		0	84	708	clone=GQ03703_C11 cluster=GQ03703_C11 status=complete gb=BT115625	GQ03703_C11.1	617	1564	1557	609	802/949		0	84	708	clone=GQ03703_C11 cluster=GQ03703_C11 status=complete gb=BT115625	contig08020	0	99	1901	length=987 numreads=16	contig02803	0	94	1489	length=992 numreads=9
Unigene188_Taxus	GQ03414_O11.3	182	1189	1267	269	830/1008		1e-162	82	575	clone=GQ03414_O11 cluster=GQ03414_L01 status=53	GQ03205_L14.2	182	433	1209	958	216/252		1e-54	85	214	clone=GQ03205_L14 cluster=GQ03205_L14 status=complete gb=BT109195	contig09244	0	92	716	length=670 numreads=13	contig02232	0	97	924	length=509 numreads=4
Unigene189_Taxus																							contig26059	7e-55	96	212	length=885 numreads=15
Unigene190_Taxus																							contig12903	0	98	2022	length=1146 numreads=39	FXAT9O003CZ9GY	1e-146	95	515
Unigene191_Taxus																							contig16947	0	98	751	length=2311 numreads=66	FXAT9O003DDS3F	1e-179	98	624
Unigene192_Taxus
Unigene193_Taxus	WS00840_O13.1	201	625	427	3	349/425	5' read(R)	8e-62	82	240	clone=WS00840_O13 cluster=GQ04013_N16 status=3	GQ04013_N16.1	201	625	1236	812	347/425		9e-58	81	224	clone=GQ04013_N16 cluster=GQ04013_N16 status=complete gb=BT119051	contig03892	0	99	2359	length=1514 numreads=66	FXAT9O003C169T	0	98	728
Unigene194_Taxus																							contig05666	0	98	753	length=1204 numreads=73	contig05010	0	98	654	length=382 numreads=2
Unigene195_Taxus																							contig01324	1e-150	99	529	length=938 numreads=59
Unigene196_Taxus																							contig06206	1e-127	97	452	length=1511 numreads=71	contig01799	1e-108	97	389	length=1467 numreads=17
Unigene197_Taxus																												contig04176	6e-51	100	198	length=438 numreads=2
Unigene198_Taxus																							contig24060	1e-122	96	438	length=264 numreads=8
Unigene199_Taxus	GQ03323_N22.1	87	201	189	303	99/115		3e-20	86	101	clone=GQ03323_N22 cluster=GQ03013_K03 status=5	GQ03013_K03.1	87	201	169	283	98/115		1e-18	85	93.7	clone=GQ03013_K03 cluster=GQ03013_K03 status=complete gb=BT106920	contig02022	0	99	1485	length=1078 numreads=51	FXAT9O003DBF4H	1e-59	94	228
Unigene200_Taxus	WS02621_E03.1	40	239	449	648	160/200		1e-13	80	79.8	clone=WS02621_E03 cluster=GQ03310_N03 status=3												contig01570	0	96	809	length=451 numreads=4	contig01420	3e-08	86	58	length=1152 numreads=11
Unigene201_Taxus	GQ0049_M22.1	262	736	523	50	405/476		4e-97	85	357	clone=GQ0049_M22 cluster=GQ03229_E17 status=complete	GQ03229_E17.1	262	736	534	64	401/476		4e-90	84	331	clone=GQ03229_E17 cluster=GQ03229_E17 status=complete gb=BT110888	contig16668	0	98	1679	length=1013 numreads=65	FXAT9O003CZPCY	0	97	638
Unigene202_Taxus																							contig04752	0	99	2079	length=1193 numreads=23	FXAT9O003DPD8R	0	99	997
Unigene203_Taxus																							contig31954	0	97	821	length=701 numreads=6	contig04445	0	98	866	length=486 numreads=4
Unigene204_Taxus	GQ04013_E01.1	374	558	738	554	153/185		6e-24	82	113	clone=GQ04013_E01 cluster=GQ04013_E01 status=complete gb=BT119004	GQ04013_E01.1	374	558	738	554	153/185		1e-24	82	113	clone=GQ04013_E01 cluster=GQ04013_E01 status=complete gb=BT119004	contig33291	1e-149	97	525	length=370 numreads=12
Unigene205_Taxus																							contig17777	0	94	809	length=1150 numreads=27	FXAT9O003CYRHH	0	97	684
Unigene206_Taxus																							contig07916	0	99	1929	length=1494 numreads=32	contig01873	1e-103	100	375	length=800 numreads=5
Unigene207_Taxus	GQ04009_J08.1	618	1025	1637	1230	348/408		1e-89	85	333	clone=GQ04009_J08 cluster=GQ04009_J08 status=complete gb=BT118723	GQ04009_J08.1	618	1025	1637	1230	348/408		2e-90	85	333	clone=GQ04009_J08 cluster=GQ04009_J08 status=complete gb=BT118723	contig03771	0	99	3523	length=2068 numreads=57	FXAT9O003DP5X8	1e-153	98	539
Unigene208_Taxus	WS00743_F17.1	1	222	434	213	196/222		9e-61	88	234	clone=WS00743_F17 cluster=GQ03919_C06 status=3	GQ03919_C06.2	1	222	972	1193	196/222		2e-61	88	234	clone=GQ03919_C06 cluster=GQ03919_C06 status=complete gb=BT117972	contig18081	1e-104	96	377	length=1404 numreads=42	contig03694	1e-102	95	369	length=1989 numreads=19
Unigene209_Taxus	WS0344_K10.1	509	580	32	103	63/72		4e-11	87	71.9	clone=WS0344_K10 cluster=GQ02901_D03 status=3	GQ03125_H03.1	434	577	468	611	117/144		7e-12	81	71.9	clone=GQ03125_H03 cluster=GQ03125_H03 status=complete gb=BT108691	contig07435	0	99	2068	length=1304 numreads=21	contig06813	1e-173	98	605	length=331 numreads=2
Unigene210_Taxus
Unigene211_Taxus	GQ01310_D21.2	70	215	197	342	122/146		3e-20	83	99.6	clone=GQ01310_D21 cluster=GQ01310_D21 status=5	GQ01310_D21.2	70	215	197	342	122/146		6e-21	83	99.6	clone=GQ01310_D21 cluster=GQ01310_D21 status=5	contig16883	1e-119	99	424	length=821 numreads=13
Unigene212_Taxus																							contig35467	1e-100	95	363	length=383 numreads=44	contig00785	1e-87	94	319	length=710 numreads=17
Unigene213_Taxus																							contig06115	1e-152	97	535	length=1688 numreads=49	contig00384	1e-130	97	462	length=1754 numreads=25
Unigene214_Taxus																							contig07406	1e-152	97	535	length=972 numreads=24	contig03411	2e-12	82	69.9	length=424 numreads=2
Unigene215_Taxus												GQ02012_A02.1	368	453	283	198	71/86		8e-06	82	52	clone=GQ02012_A02 cluster=GQ02012_A02 status=3	contig19623	0	98	1394	length=746 numreads=13	FXAT9O003DBXJN	0	97	666
Unigene216_Taxus																							contig17259	2e-75	84	281	length=1015 numreads=10	contig07541	6e-15	96	79.8	length=500 numreads=4
Unigene217_Taxus
Unigene218_Taxus
Unigene219_Taxus																												FXAT9O003C2VR7	4e-74	89	276
Unigene220_Taxus
Unigene221_Taxus
Unigene222_Taxus	GQ03509_A08.1	12	97	379	464	71/86		7e-06	82	52	clone=GQ03509_A08 cluster=GQ03232_D12 status=5	GQ03232_D12.1	12	97	379	464	71/86		1e-06	82	52	clone=GQ03232_D12 cluster=GQ03232_D12 status=complete gb=BT111061	contig26755	5e-09	84	60	length=386 numreads=3
Unigene223_Taxus												GQ03108_J10.1	156	188	627	595	31/33		6e-06	93	50.1	clone=GQ03108_J10 cluster=GQ03108_J10 status=complete gb=BT107519
Unigene224_Taxus	GQ02825_F05.1	119	167	192	240	45/49		4e-10	91	65.9	clone=GQ02825_F05 cluster=GQ02825_F05 status=complete gb=BT105627	GQ02825_F05.1	119	167	192	240	45/49		8e-11	91	65.9	clone=GQ02825_F05 cluster=GQ02825_F05 status=complete gb=BT105627	contig12888	3e-10	90	63.9	length=500 numreads=4	FXAT9O003C8K3N	3e-14	87	75.8
Unigene225_Taxus	WS0327_K14.1	312	775	735	272	384/464		1e-75	82	285	clone=WS0327_K14 cluster=GQ02510_N10 status=complete	GQ02510_N10.1	312	775	717	254	384/464		2e-76	82	285	clone=GQ02510_N10 cluster=GQ02510_N10 status=complete gb=BT103363	contig33865	0	98	1766	length=939 numreads=51	contig00817	0	98	1752	length=945 numreads=11
Unigene226_Taxus
Unigene227_Taxus
Unigene228_Taxus	GQ03509_O12.1	56	358	243	545	243/303		5e-27	80	125	clone=GQ03509_O12 cluster=GQ03509_O12 status=complete gb=BT114188	GQ03509_O12.1	56	358	243	545	243/303		9e-28	80	125	clone=GQ03509_O12 cluster=GQ03509_O12 status=complete gb=BT114188	contig21030	0	98	1879	length=1008 numreads=8	contig00472	1e-30	80	133	length=1838 numreads=29
Unigene229_Taxus	GQ02803_G14.1	195	259	1040	1104	56/65		2e-07	86	58	clone=GQ02803_G14 cluster=GQ02803_G14 status=complete gb=BT103869	GQ02803_G14.1	195	259	1040	1104	56/65		3e-08	86	58	clone=GQ02803_G14 cluster=GQ02803_G14 status=complete gb=BT103869	contig07008	1e-117	95	418	length=2020 numreads=78	contig01750	2e-71	94	266	length=517 numreads=3
Unigene230_Taxus	WS00746_O05.1	432	653	232	11	193/222		5e-53	86	210	clone=WS00746_O05 cluster=GQ02821_D18 status=3	GQ02821_D18.1	432	653	534	755	193/222		9e-54	86	210	clone=GQ02821_D18 cluster=GQ02821_D18 status=complete gb=BT105349	contig05064	0	98	662	length=492 numreads=82	contig04019	0	98	896	length=726 numreads=10
Unigene231_Taxus																							contig20249	8e-60	95	228	length=598 numreads=33	contig06422	3e-60	95	228	length=298 numreads=4
Unigene232_Taxus	GQ03228_M03.1	4	132	133	5	108/129	5' read(R)	7e-17	83	89.7	clone=GQ03228_M03 cluster=GQ03119_A16 status=5	GQ03119_A16.1	4	146	686	544	118/143		2e-16	82	85.7	clone=GQ03119_A16 cluster=GQ03119_A16 status=complete gb=BT108260	contig09738	1e-94	98	345	length=193 numreads=1	contig01004	4e-64	92	242	length=530 numreads=8
Unigene233_Taxus																							contig13522	1e-59	98	228	length=675 numreads=27
Unigene234_Taxus	GQ03807_G08.1	188	266	742	820	66/79		4e-06	83	54	clone=GQ03807_G08 cluster=GQ03713_P23 status=5	GQ03713_P23.1	188	266	815	893	66/79		7e-07	83	54	clone=GQ03713_P23 cluster=GQ03713_P23 status=complete gb=BT116223	contig07203	1e-122	97	436	length=2219 numreads=25	contig01913	1e-127	98	452	length=2319 numreads=19
Unigene235_Taxus																							contig34682	4e-46	100	182	length=851 numreads=53	FXAT9O003DREQA	2e-21	95	99.6
Unigene236_Taxus																							contig26015	4e-16	97	85.7	length=295 numreads=2
Unigene237_Taxus	WS02630_K20.1	18	83	56	121	57/66		3e-08	86	60	clone=WS02630_K20 cluster=GQ0041_P16 status=complete	GQ0041_P16.1	196	234	20	58	36/39		4e-07	92	54	clone=GQ0041_P16 cluster=GQ0041_P16 status=complete gb=BT100752	contig08467	2e-17	93	87.7	length=1022 numreads=7
Unigene238_Taxus																							contig34604	1e-62	97	238	length=366 numreads=4
Unigene239_Taxus
Unigene240_Taxus																							contig00921	6e-81	90	299	length=754 numreads=13	contig03516	5e-39	88	159	length=496 numreads=4
Unigene241_Taxus	GQ00412_P20.1	95	1137	1049	7	920/1043	5' read(R)	0	88	1092	clone=GQ00412_P20 cluster=GQ04005_M02 status=complete	GQ04005_M02.1	1109	1428	765	446	262/323		9e-35	81	149	clone=GQ04005_M02 cluster=GQ04005_M02 status=complete gb=BT118376	contig04863	0	99	2555	length=1748 numreads=97
Unigene242_Taxus	GQ03232_I13.1	1	288	621	335	243/288		6e-57	84	222	clone=GQ03232_I13 cluster=GQ03111_N01 status=complete	GQ03111_N01.1	1	288	744	458	242/288		3e-55	84	214	clone=GQ03111_N01 cluster=GQ03111_N01 status=complete gb=BT107708	contig15488	1e-101	93	367	length=1710 numreads=51	contig04947	1e-162	93	567	length=1274 numreads=11
Unigene243_Taxus																							contig07719	1e-157	97	553	length=793 numreads=11
Unigene244_Taxus
Unigene245_Taxus	GQ03603_G01.1	190	316	353	227	105/127		3e-13	82	77.8	clone=GQ03603_G01 cluster=GQ03603_G01 status=complete gb=BT114836	GQ03603_G01.1	190	316	353	227	105/127		6e-14	82	77.8	clone=GQ03603_G01 cluster=GQ03603_G01 status=complete gb=BT114836						FXAT9O003C4DHL	3e-10	81	63.9
Unigene246_Taxus																							contig24589	3e-19	92	93.7	length=452 numreads=6
Unigene247_Taxus
Unigene248_Taxus	WS0071_O18.1	658	1031	407	30	309/378		2e-49	81	200	clone=WS0071_O18 cluster=WS0313_H03 status=3	GQ02807_K08.1	1201	1405	209	6	169/205	5' read(R)	6e-24	82	113	clone=GQ02807_K08 cluster=GQ02807_K08 status=complete gb=BT104208	contig16483	0	98	2809	length=1971 numreads=46
Unigene249_Taxus																							contig31784	0	99	670	length=350 numreads=3	FXAT9O003C65T7	0	99	928
Unigene250_Taxus																							contig23425	1e-46	100	184	length=828 numreads=18	FXAT9O003DMXXW	4e-35	100	145
Unigene251_Taxus																							contig05419	0	99	775	length=535 numreads=15
Unigene252_Taxus												GQ03012_L13.1	477	518	50	91	38/42		5e-06	90	52	clone=GQ03012_L13 cluster=GQ03012_L13 status=complete gb=BT106879
Unigene253_Taxus	GQ03312_I12.1	4	212	283	485	183/209		3e-53	87	210	clone=GQ03312_I12 cluster=GQ02810_C02 status=complete	GQ02810_C02.1	4	212	668	870	182/209		1e-51	87	202	clone=GQ02810_C02 cluster=GQ02810_C02 status=complete gb=BT104414	contig06243	1e-101	96	367	length=1422 numreads=32
Unigene254_Taxus
Unigene255_Taxus																							contig14886	8e-51	100	198	length=1230 numreads=12	contig06398	2e-46	99	182	length=442 numreads=2
Unigene256_Taxus																							contig08995	1e-38	92	159	length=812 numreads=7	contig03622	4e-39	95	159	length=446 numreads=2
Unigene257_Taxus	GQ03228_K06.1	864	997	138	5	122/134	5' read(R)	1e-40	91	170	clone=GQ03228_K06 cluster=GQ03228_K06 status=complete gb=BT110838	GQ03228_K06.1	864	997	138	5	122/134	5' read(R)	2e-41	91	170	clone=GQ03228_K06 cluster=GQ03228_K06 status=complete gb=BT110838	contig18075	0	99	2014	length=1201 numreads=19
Unigene258_Taxus	GQ03504_I16.2	135	211	2070	2146	67/77		2e-12	87	73.8	clone=GQ03504_I16 cluster=GQ03504_I16 status=complete gb=BT113921	GQ03504_I16.2	135	211	2070	2146	67/77		4e-13	87	73.8	clone=GQ03504_I16 cluster=GQ03504_I16 status=complete gb=BT113921
Unigene259_Taxus	GQ0205_M06.1	324	1095	1706	935	668/772		0	86	708	clone=GQ0205_M06 cluster=GQ03919_P11 status=53	GQ03919_P11.1	324	501	179	2	149/178	5' read(R)	4e-27	83	123	clone=GQ03919_P11 cluster=GQ03919_P11 status=complete gb=BT117995	contig15466	0	99	3207	length=1799 numreads=45	contig07033	1e-140	98	496	length=266 numreads=2
Unigene260_Taxus
Unigene261_Taxus	GQ02822_C13.1	310	415	860	965	93/106		5e-22	87	107	clone=GQ02822_C13 cluster=GQ02822_C13 status=complete gb=BT105420	GQ02822_C13.1	310	415	860	965	93/106		1e-22	87	107	clone=GQ02822_C13 cluster=GQ02822_C13 status=complete gb=BT105420	contig17048	0	99	1068	length=648 numreads=8	FXAT9O003CYC1G	1e-167	99	587
Unigene262_Taxus
Unigene263_Taxus	GQ02811_I08.1	9	88	146	225	71/80		3e-16	88	87.7	clone=GQ02811_I08 cluster=GQ02804_I01 status=complete	GQ02804_I01.1	9	88	289	368	71/80		5e-17	88	87.7	clone=GQ02804_I01 cluster=GQ02804_I01 status=complete gb=BT103944	contig20907	1e-172	99	603	length=1152 numreads=17
Unigene264_Taxus
Unigene265_Taxus	GQ03707_K16.1	827	1786	323	1282	850/960		0	88	1031	clone=GQ03707_K16 cluster=GQ03707_K16 status=complete gb=BT115867	GQ03707_K16.1	827	1786	323	1282	850/960		0	88	1031	clone=GQ03707_K16 cluster=GQ03707_K16 status=complete gb=BT115867	contig18251	0	99	1976	length=1020 numreads=15	contig03104	2e-69	80	262	length=912 numreads=8
Unigene266_Taxus	GQ04007_L17.1	33	96	65	2	57/64	5' read(R)	8e-12	89	71.9	clone=GQ04007_L17 cluster=GQ02808_B12 status=complete	GQ02808_B12.1	33	96	391	328	57/64		2e-12	89	71.9	clone=GQ02808_B12 cluster=GQ02808_B12 status=complete gb=BT104233	contig16273	4e-34	98	143	length=698 numreads=10
Unigene267_Taxus
Unigene268_Taxus	GQ03220_F23.1	579	815	283	519	195/237		1e-30	82	137	clone=GQ03220_F23 cluster=GQ03220_F23 status=complete gb=BT110348	GQ03220_F23.1	579	815	283	519	195/237		3e-31	82	137	clone=GQ03220_F23 cluster=GQ03220_F23 status=complete gb=BT110348	contig26518	1e-156	99	553	length=464 numreads=3	contig01662	0	99	2716	length=1496 numreads=31
Unigene269_Taxus	GQ03811_H19.1	130	215	1422	1507	78/86		1e-22	90	107	clone=GQ03811_H19 cluster=GQ03811_H19 status=complete gb=BT117038	GQ03811_H19.1	130	215	1422	1507	78/86		3e-23	90	107	clone=GQ03811_H19 cluster=GQ03811_H19 status=complete gb=BT117038						FXAT9O003DF65A	4e-50	100	194
Unigene270_Taxus
Unigene271_Taxus																							contig17189	3e-24	91	111	length=360 numreads=5	contig00405	1e-48	97	190	length=760 numreads=20
Unigene272_Taxus	GQ03235_F13.1	754	1763	727	1736	879/1010		0	87	963	clone=GQ03235_F13 cluster=GQ03235_F13 status=complete gb=BT111277	GQ03235_F13.1	754	1763	727	1736	879/1010		0	87	963	clone=GQ03235_F13 cluster=GQ03235_F13 status=complete gb=BT111277	contig16129	0	99	2603	length=1386 numreads=28	contig01462	2e-29	98	129	length=458 numreads=3
Unigene273_Taxus	WS03210_I19.1	301	343	300	258	40/43		5e-08	93	61.9	clone=WS03210_I19 cluster=WS00753_E05 status=complete	WS00753_E05.1	301	343	402	360	40/43		9e-09	93	61.9	clone=WS00753_E05 cluster=WS00753_E05 status=3	contig29627	1e-158	97	559	length=318 numreads=5	FXAT9O003C5VRO	0	96	860
Unigene274_Taxus	GQ04103_I20.1	1	1154	1167	14	998/1154		0	86	1051	clone=GQ04103_I20 cluster=GQ04103_I20 status=complete gb=BT119278	GQ04103_I20.1	1	1154	1167	14	998/1154		0	86	1051	clone=GQ04103_I20 cluster=GQ04103_I20 status=complete gb=BT119278	contig11974	0	99	2761	length=2098 numreads=41	contig02569	0	99	938	length=496 numreads=3
Unigene275_Taxus
Unigene276_Taxus
Unigene277_Taxus																							contig22520	0	97	1489	length=831 numreads=8	FXAT9O003C09FP	0	97	870
Unigene278_Taxus
Unigene279_Taxus																							contig14331	1e-107	97	387	length=591 numreads=16
Unigene280_Taxus
Unigene281_Taxus																							contig25489	4e-50	93	196	length=650 numreads=11
Unigene282_Taxus																							contig08215	2e-48	99	190	length=393 numreads=24
Unigene283_Taxus																							contig01015	9e-60	99	228	length=2749 numreads=109
Unigene284_Taxus																							contig25052	1e-51	85	202	length=474 numreads=20	FXAT9O003DBZTW	3e-28	82	123
Unigene285_Taxus	GQ02823_E02.1	311	474	1097	1260	147/164		4e-47	89	190	clone=GQ02823_E02 cluster=GQ02823_E02 status=complete gb=BT105484	GQ02823_E02.1	311	474	1097	1260	147/164		8e-48	89	190	clone=GQ02823_E02 cluster=GQ02823_E02 status=complete gb=BT105484	contig07537	0	98	807	length=1356 numreads=11	FXAT9O003DNUM4	1e-131	99	466
Unigene286_Taxus
Unigene287_Taxus	GQ0132_I09.1	747	1350	18	617	507/604		1e-114	83	416	clone=GQ0132_I09 cluster=GQ0132_I09 status=complete gb=BT101891	GQ0132_I09.1	747	1350	18	617	507/604		1e-115	83	416	clone=GQ0132_I09 cluster=GQ0132_I09 status=complete gb=BT101891	contig10963	0	98	1310	length=713 numreads=7	contig03029	1e-140	98	498	length=274 numreads=1
Unigene288_Taxus	GQ02829_O21.1	3	248	7	252	205/246	5' read(F)	3e-39	83	163	clone=GQ02829_O21 cluster=GQ02829_O21 status=complete gb=BT105907	GQ02829_O21.1	3	248	7	252	205/246	5' read(F)	6e-40	83	163	clone=GQ02829_O21 cluster=GQ02829_O21 status=complete gb=BT105907	contig18790	1e-137	99	486	length=1363 numreads=33	contig01786	3e-36	97	149	length=1099 numreads=7
Unigene289_Taxus																							contig00239	2e-82	92	303	length=1271 numreads=45
Unigene290_Taxus	GQ03903_A07.1	241	317	568	644	68/77		6e-14	88	81.8	clone=GQ03903_A07 cluster=GQ03903_A07 status=complete gb=BT117551	GQ03903_A07.1	241	317	568	644	68/77		1e-14	88	81.8	clone=GQ03903_A07 cluster=GQ03903_A07 status=complete gb=BT117551	contig21373	4e-57	98	222	length=820 numreads=6	contig04765	2e-10	97	65.9	length=482 numreads=3
Unigene291_Taxus																							contig17639	1e-171	97	599	length=1044 numreads=17	contig06740	1e-161	97	565	length=413 numreads=3
Unigene292_Taxus	WS0261_F04.1	186	655	754	285	408/470		1e-121	86	440	clone=WS0261_F04 cluster=GQ02818_G05 status=3	GQ02818_G05.1	186	655	1108	639	407/470		1e-120	86	432	clone=GQ02818_G05 cluster=GQ02818_G05 status=complete gb=BT105089	contig21814	0	99	2755	length=1492 numreads=27	FXAT9O003C048L	0	98	749
Unigene293_Taxus																							contig06044	2e-08	100	58	length=1571 numreads=80
Unigene294_Taxus																							contig14985	0	99	668	length=1393 numreads=16
Unigene295_Taxus	GQ04112_N16.1	2517	2657	11	151	118/141		2e-18	83	97.6	clone=GQ04112_N16 cluster=GQ04112_N16 status=complete gb=BT119941	GQ04112_N16.1	2517	2657	11	151	118/141		4e-19	83	97.6	clone=GQ04112_N16 cluster=GQ04112_N16 status=complete gb=BT119941	contig27547	0	98	1865	length=996 numreads=9	FXAT9O003C4M9K	5e-87	98	321
Unigene296_Taxus	GQ03308_J03.1	735	1158	733	313	374/426		1e-114	87	416	clone=GQ03308_J03 cluster=GQ03308_J03 status=complete gb=BT111995	GQ03308_J03.1	735	1158	733	313	374/426		1e-115	87	416	clone=GQ03308_J03 cluster=GQ03308_J03 status=complete gb=BT111995	contig15581	0	99	2407	length=1366 numreads=23	FXAT9O003C6EJU	0	97	934
Unigene297_Taxus	GQ0072_K21.1	3016	3694	155	833	600/679		0	88	720	clone=GQ0072_K21 cluster=GQ0072_K21 status=complete gb=BT101200	GQ0072_K21.1	3016	3694	155	833	600/679		0	88	720	clone=GQ0072_K21 cluster=GQ0072_K21 status=complete gb=BT101200	contig09650	0	99	1665	length=2033 numreads=24	FXAT9O003DBHZO	0	99	835
Unigene298_Taxus	GQ03308_N12.1	719	1079	228	588	317/361		1e-100	87	367	clone=GQ03308_N12 cluster=GQ03308_N12 status=complete gb=BT112017	GQ03308_N12.1	719	1079	228	588	317/361		1e-100	87	367	clone=GQ03308_N12 cluster=GQ03308_N12 status=complete gb=BT112017	contig29970	0	97	777	length=434 numreads=6	FXAT9O003DN5Y5	1e-171	96	601
Unigene299_Taxus																							contig24046	3e-51	97	200	length=698 numreads=20	contig00355	1e-177	97	618	length=701 numreads=6
Unigene300_Taxus	GQ0044_K07.1	7	64	164	107	54/58		2e-15	93	83.8	clone=GQ0044_K07 cluster=GQ03709_J01 status=3	GQ03709_J01.1	7	64	176	119	53/58		1e-13	91	75.8	clone=GQ03709_J01 cluster=GQ03709_J01 status=complete gb=BT115966	contig02433	2e-64	99	244	length=712 numreads=19	contig01780	6e-65	99	244	length=717 numreads=34
Unigene301_Taxus																							contig11683	1e-113	98	404	length=1348 numreads=80
Unigene302_Taxus																							contig04483	3e-10	89	63.9	length=1791 numreads=64
Unigene303_Taxus																							contig28872	7e-89	94	325	length=425 numreads=13
Unigene304_Taxus	GQ03125_K23.1	196	592	399	6	340/397	5' read(R)	4e-89	85	331	clone=GQ03125_K23 cluster=GQ03125_K23 status=complete gb=BT108710	GQ03125_K23.1	196	592	399	6	340/397	5' read(R)	7e-90	85	331	clone=GQ03125_K23 cluster=GQ03125_K23 status=complete gb=BT108710	contig19979	0	98	1915	length=1342 numreads=38	contig03091	0	99	737	length=376 numreads=2
Unigene305_Taxus																							contig29430	1e-43	98	174	length=526 numreads=7
Unigene306_Taxus	GQ03817_I14.1	303	413	215	325	93/111		3e-13	83	77.8	clone=GQ03817_I14 cluster=GQ03719_J09 status=5	GQ03719_J09.1	303	413	216	326	93/111		6e-14	83	77.8	clone=GQ03719_J09 cluster=GQ03719_J09 status=complete gb=BT116489	contig02988	1e-151	96	533	length=843 numreads=14	FXAT9O003DQ1FE	5e-86	97	315
Unigene307_Taxus																							contig16625	5e-12	97	69.9	length=1844 numreads=40
Unigene308_Taxus																							contig24551	1e-101	94	367	length=923 numreads=99
Unigene309_Taxus
Unigene310_Taxus
Unigene311_Taxus																							contig36359	8e-85	99	313	length=163 numreads=16
Unigene312_Taxus
Unigene313_Taxus																							contig27692	1e-111	94	398	length=1166 numreads=8
Unigene314_Taxus
Unigene315_Taxus																							contig34516	0	94	880	length=1073 numreads=21	FXAT9O003DAHNY	5e-09	92	60
Unigene316_Taxus																							contig31543	4e-59	99	226	length=1050 numreads=34
Unigene317_Taxus																							contig19891	0	96	835	length=493 numreads=3
Unigene318_Taxus	GQ03223_M10.1	744	1443	200	893	599/700		1e-167	85	589	clone=GQ03223_M10 cluster=GQ03223_M10 status=complete gb=BT110573	GQ03223_M10.1	744	1443	200	893	599/700		1e-167	85	589	clone=GQ03223_M10 cluster=GQ03223_M10 status=complete gb=BT110573	contig23400	0	99	797	length=414 numreads=2
Unigene319_Taxus	GQ03322_A20.1	1169	1305	187	51	121/137		6e-33	88	145	clone=GQ03322_A20 cluster=GQ03322_A20 status=complete gb=BT112868	GQ03322_A20.1	1169	1305	187	51	121/137		1e-33	88	145	clone=GQ03322_A20 cluster=GQ03322_A20 status=complete gb=BT112868	contig14368	0	96	900	length=926 numreads=9
Unigene320_Taxus	GQ02771_E01.1	808	1190	631	249	313/383		5e-51	81	204	clone=GQ02771_E01 cluster=GQ02771_E01 status=5	GQ02771_E01.1	808	1190	631	249	313/383		9e-52	81	204	clone=GQ02771_E01 cluster=GQ02771_E01 status=5	contig19940	1e-165	95	581	length=709 numreads=14	contig04926	2e-13	90	75.8	length=421 numreads=2
Unigene321_Taxus																							contig05780	2e-27	91	121	length=1550 numreads=29	FXAT9O003DG6GV	3e-26	91	115
Unigene322_Taxus																							contig10905	2e-40	97	165	length=379 numreads=50
Unigene323_Taxus																							contig10099	0	99	981	length=754 numreads=114
Unigene324_Taxus	GQ04009_N24.1	117	566	1181	732	372/450		3e-72	82	274	clone=GQ04009_N24 cluster=GQ04009_N24 status=complete gb=BT118753	GQ04009_N24.1	117	566	1181	732	372/450		5e-73	82	274	clone=GQ04009_N24 cluster=GQ04009_N24 status=complete gb=BT118753	contig10024	0	99	1090	length=1094 numreads=12	FXAT9O003CX3Y9	0	99	783
Unigene325_Taxus	WS0325_G21.1	773	807	209	175	34/35		5e-08	97	61.9	clone=WS0325_G21 cluster=GQ03409_M13 status=3	WS03212_E20.1	777	809	646	678	32/33		2e-07	96	58	clone=WS03212_E20 cluster=WS03212_E20 status=3	contig04359	0	97	1495	length=1284 numreads=23
Unigene326_Taxus																							contig04404	1e-151	98	531	length=1209 numreads=19
Unigene327_Taxus																							contig15095	1e-153	98	539	length=1836 numreads=50	contig00302	1e-156	98	549	length=1841 numreads=175
Unigene328_Taxus	WS0348_E10.1	449	585	233	97	118/137		4e-26	86	121	clone=WS0348_E10 cluster=GQ03717_J08 status=complete	GQ03717_J08.1	449	585	472	336	118/137		7e-27	86	121	clone=GQ03717_J08 cluster=GQ03717_J08 status=complete gb=BT116376	contig10742	0	95	1136	length=1006 numreads=34	FXAT9O003CZJK8	1e-120	93	430
Unigene329_Taxus																												FXAT9O003DDS0G	1e-103	94	375
Unigene330_Taxus																							contig25045	2e-14	90	77.8	length=252 numreads=4
Unigene331_Taxus	GQ04012_N04.1	185	241	480	424	51/57		5e-10	89	65.9	clone=GQ04012_N04 cluster=GQ03914_N06 status=5	GQ03914_N06.1	185	241	804	748	51/57		1e-10	89	65.9	clone=GQ03914_N06 cluster=GQ03914_N06 status=complete gb=BT117860	contig25063	5e-46	100	182	length=1027 numreads=9	contig06628	2e-49	100	192	length=404 numreads=2
Unigene332_Taxus																							contig23325	0	99	660	length=1355 numreads=22
Unigene333_Taxus																												contig05677	4e-38	94	155	length=210 numreads=2
Unigene334_Taxus	WS02613_E09.1	336	430	369	463	80/95		6e-11	84	69.9	clone=WS02613_E09 cluster=GQ03908_P03 status=complete	GQ03908_P03.1	336	430	382	476	80/95		1e-11	84	69.9	clone=GQ03908_P03 cluster=GQ03908_P03 status=5	contig24719	4e-60	100	230	length=285 numreads=3
Unigene335_Taxus
Unigene336_Taxus																							contig13452	1e-143	97	505	length=790 numreads=11
Unigene337_Taxus																							contig10597	2e-08	100	58	length=1111 numreads=51	contig05043	7e-09	100	58	length=320 numreads=2
Unigene338_Taxus
Unigene339_Taxus																							contig32077	1e-43	100	174	length=114 numreads=2	contig01157	1e-32	98	137	length=464 numreads=3
Unigene340_Taxus																							contig34017	2e-50	100	198	length=299 numreads=53	FXAT9O003C0G8S	9e-87	99	317
Unigene341_Taxus	GQ0133_L21.1	52	170	121	3	104/119	5' read(R)	6e-25	87	117	clone=GQ0133_L21 cluster=GQ0133_L21 status=complete gb=BT101937	GQ0133_L21.1	52	170	121	3	104/119	5' read(R)	1e-25	87	117	clone=GQ0133_L21 cluster=GQ0133_L21 status=complete gb=BT101937	contig32911	1e-160	99	563	length=663 numreads=39	contig04121	0	100	706	length=600 numreads=6
Unigene342_Taxus
Unigene343_Taxus
Unigene344_Taxus																							contig19560	5e-48	99	190	length=642 numreads=11
Unigene345_Taxus
Unigene346_Taxus																							contig34351	5e-12	97	69.9	length=109 numreads=4	FXAT9O003DI2QE	2e-09	93	60
Unigene347_Taxus																							contig24320	9e-15	100	79.8	length=537 numreads=15
Unigene348_Taxus																												FXAT9O003C1V2F	2e-18	81	89.7
Unigene349_Taxus																							contig26942	3e-54	90	210	length=350 numreads=2
Unigene350_Taxus	GQ03233_M09.1	2025	3268	106	1349	1073/1245		0	86	1088	clone=GQ03233_M09 cluster=GQ03233_M09 status=complete gb=BT111168	GQ03233_M09.1	2025	3268	106	1349	1073/1245		0	86	1088	clone=GQ03233_M09 cluster=GQ03233_M09 status=complete gb=BT111168	contig25936	0	99	1832	length=994 numreads=14	FXAT9O003C8SJ8	0	98	712
Unigene351_Taxus																							contig27778	0	99	898	length=563 numreads=4	FXAT9O003DQSN2	0	97	672
Unigene352_Taxus
Unigene353_Taxus																							contig23545	1e-151	98	531	length=612 numreads=14
Unigene354_Taxus
Unigene355_Taxus	GQ03002_L24.1	366	604	263	25	202/239		3e-44	84	180	clone=GQ03002_L24 cluster=GQ03101_C14 status=complete	GQ0044_P03.2	251	604	1419	1066	287/354		6e-42	81	170	clone=GQ0044_P03 cluster=GQ0044_P03 status=complete gb=BT100799
Unigene356_Taxus																							contig17585	1e-122	95	436	length=1574 numreads=58	FXAT9O003DBH3P	1e-105	92	377
Unigene357_Taxus	GQ03410_F15.1	25	86	101	40	54/62		1e-07	87	60	clone=GQ03410_F15 cluster=GQ03410_F15 status=5	GQ03410_F15.1	25	86	101	40	54/62		2e-08	87	60	clone=GQ03410_F15 cluster=GQ03410_F15 status=5						FXAT9O003CVBT3	1e-139	98	494
Unigene358_Taxus	GQ03010_L12.1	17	613	212	808	499/597		1e-112	83	406	clone=GQ03010_L12 cluster=GQ03010_L12 status=complete gb=BT106796	GQ03010_L12.1	17	613	212	808	499/597		1e-113	83	406	clone=GQ03010_L12 cluster=GQ03010_L12 status=complete gb=BT106796	contig14830	0	99	1693	length=2215 numreads=56	contig06186	0	99	781	length=573 numreads=7
Unigene359_Taxus	GQ03719_M12.1	2530	3049	25	544	457/520		1e-149	87	531	clone=GQ03719_M12 cluster=GQ03719_M12 status=complete gb=BT116495	GQ03719_M12.1	2530	3049	25	544	457/520		1e-150	87	531	clone=GQ03719_M12 cluster=GQ03719_M12 status=complete gb=BT116495	contig09027	0	99	688	length=1499 numreads=31	FXAT9O003C72D9	0	99	868
Unigene360_Taxus
Unigene361_Taxus																							contig03150	8e-91	97	331	length=306 numreads=4
Unigene362_Taxus	WS03213_J15.1	343	491	303	451	123/149		1e-16	82	89.7	clone=WS03213_J15 cluster=GQ03202_E05 status=complete	GQ03202_E05.1	343	491	358	506	123/149		2e-17	82	89.7	clone=GQ03202_E05 cluster=GQ03202_E05 status=complete gb=BT108894	contig03518	1e-109	100	394	length=781 numreads=26	contig04649	4e-59	97	226	length=250 numreads=3
Unigene363_Taxus
Unigene364_Taxus	GQ03517_L22.1	671	770	241	142	82/100		2e-06	82	56	clone=GQ03517_L22 cluster=GQ03517_L22 status=complete gb=BT114603	GQ03517_L22.1	671	770	241	142	82/100		4e-07	82	56	clone=GQ03517_L22 cluster=GQ03517_L22 status=complete gb=BT114603
Unigene365_Taxus	GQ03818_P23.1	221	450	646	875	194/230		6e-41	84	170	clone=GQ03818_P23 cluster=GQ03818_P23 status=complete gb=BT117408	GQ03818_P23.1	221	450	646	875	194/230		1e-41	84	170	clone=GQ03818_P23 cluster=GQ03818_P23 status=complete gb=BT117408	contig20413	0	97	1140	length=798 numreads=13
Unigene366_Taxus																							contig24716	4e-22	90	103	length=1127 numreads=10
Unigene367_Taxus	GQ04108_N14.1	88	186	160	62	87/99		1e-20	87	101	clone=GQ04108_N14 cluster=GQ04108_N14 status=complete gb=BT119692	GQ04108_N14.1	88	186	160	62	87/99		3e-21	87	101	clone=GQ04108_N14 cluster=GQ04108_N14 status=complete gb=BT119692
Unigene368_Taxus	GQ02813_O22.1	712	1093	481	862	327/382		4e-86	85	321	clone=GQ02813_O22 cluster=GQ02802_L17 status=complete	GQ02802_L17.3	712	1093	1147	1528	327/382		7e-87	85	321	clone=GQ02802_L17 cluster=GQ02802_L17 status=complete gb=BT103826	contig09769	0	98	2579	length=1487 numreads=27	FXAT9O003C371L	0	97	868
Unigene369_Taxus																							contig16583	3e-48	99	190	length=2231 numreads=60
Unigene370_Taxus																							contig00413	1e-90	96	331	length=502 numreads=5
Unigene371_Taxus	GQ03235_I18.1	6	77	551	480	63/72		7e-12	87	71.9	clone=GQ03235_I18 cluster=GQ03010_C22 status=5	GQ03010_C22.2	6	77	1347	1276	62/72		3e-10	86	63.9	clone=GQ03010_C22 cluster=GQ03010_C22 status=complete gb=BT106772	contig16175	2e-23	88	107	length=826 numreads=24
Unigene372_Taxus
Unigene373_Taxus
Unigene374_Taxus																							contig09014	2e-73	90	276	length=236 numreads=10	FXAT9O003DIHM4	6e-37	85	153
Unigene375_Taxus
Unigene376_Taxus
Unigene377_Taxus	GQ0064_A01.1	394	422	568	596	29/29		4e-07	100	58	clone=GQ0064_A01 cluster=GQ02818_K13 status=complete												contig15101	6e-08	100	58	length=1319 numreads=20	FXAT9O003DO7ZB	9e-54	95	208
Unigene378_Taxus
Unigene379_Taxus
Unigene380_Taxus	GQ03126_O10.1	101	169	150	218	60/69		6e-10	86	65.9	clone=GQ03126_O10 cluster=GQ03126_O10 status=complete gb=BT108776	GQ03126_O10.1	101	169	150	218	60/69		1e-10	86	65.9	clone=GQ03126_O10 cluster=GQ03126_O10 status=complete gb=BT108776	contig32403	2e-18	92	91.7	length=110 numreads=5	FXAT9O003DDCO8	6e-19	100	91.7
Unigene381_Taxus																							contig18590	5e-81	98	299	length=390 numreads=3
Unigene382_Taxus																							contig26529	1e-168	96	589	length=705 numreads=28	FXAT9O003DOJ57	2e-24	90	111
Unigene383_Taxus	GQ03102_I22.1	350	642	255	547	257/293		1e-78	87	295	clone=GQ03102_I22 cluster=GQ03003_M21 status=complete	GQ03003_M21.1	350	642	300	592	255/293		2e-74	87	280	clone=GQ03003_M21 cluster=GQ03003_M21 status=complete gb=BT106521	contig03212	0	98	1992	length=1079 numreads=95	contig03933	0	98	1229	length=663 numreads=6
Unigene384_Taxus	GQ03005_D23.1	53	223	420	249	143/172		2e-22	83	107	clone=GQ03005_D23 cluster=GQ03005_C12 status=complete												contig09866	1e-114	98	408	length=1776 numreads=34
Unigene385_Taxus																												FXAT9O003C6L7Z	8e-69	100	258
Unigene386_Taxus	GQ0195_G17.2	1	202	744	543	175/202		2e-46	86	186	clone=GQ0195_G17 cluster=GQ0195_G17 status=complete gb=BT102493	GQ0195_G17.2	1	202	744	543	175/202		3e-47	86	186	clone=GQ0195_G17 cluster=GQ0195_G17 status=complete gb=BT102493	contig16886	3e-22	81	103	length=1338 numreads=37	contig02417	4e-07	88	52	length=1149 numreads=6
Unigene387_Taxus																							contig13883	1e-17	86	91.7	length=454 numreads=3	FXAT9O003DET0E	0	99	692
Unigene388_Taxus
Unigene389_Taxus	GQ03222_G20.1	111	1552	436	1877	1255/1442		0	87	1376	clone=GQ03222_G20 cluster=GQ03222_G20 status=complete gb=BT110478	GQ03222_G20.1	111	1552	436	1877	1255/1442		0	87	1376	clone=GQ03222_G20 cluster=GQ03222_G20 status=complete gb=BT110478	contig11915	0	99	3511	length=2075 numreads=60	FXAT9O003C6DBF	0	99	745
Unigene390_Taxus																							contig21162	6e-15	87	81.8	length=847 numreads=5
Unigene391_Taxus	GQ04112_C13.1	259	383	425	549	110/125		2e-28	88	129	clone=GQ04112_C13 cluster=GQ02814_C01 status=5	GQ02814_C01.1	261	433	615	787	146/173		4e-29	84	129	clone=GQ02814_C01 cluster=GQ02814_C01 status=complete gb=BT104732	contig14124	0	99	2278	length=1787 numreads=30	FXAT9O003C81ZZ	0	98	888
Unigene392_Taxus	GQ03909_M21.2	4	296	804	517	245/293		2e-50	83	200	clone=GQ03909_M21 cluster=GQ03909_M21 status=complete gb=BT117742	GQ03909_M21.2	4	296	804	517	245/293		3e-51	83	200	clone=GQ03909_M21 cluster=GQ03909_M21 status=complete gb=BT117742	contig16012	7e-92	96	335	length=497 numreads=3
Unigene393_Taxus	WS00722_B21.1	136	590	541	87	401/455		1e-132	88	474	clone=WS00722_B21 cluster=GQ0178_C17 status=3	GQ0178_C17.2	136	590	1152	698	401/455		1e-133	88	474	clone=GQ0178_C17 cluster=GQ0178_C17 status=3	contig23809	0	98	934	length=1022 numreads=9	contig02016	0	99	1170	length=1077 numreads=11
Unigene394_Taxus
Unigene395_Taxus																							contig08012	0	97	1183	length=1747 numreads=39	FXAT9O003DD9GO	1e-146	98	517
Unigene396_Taxus																							contig26075	0	99	1679	length=875 numreads=12	FXAT9O003DF6TK	0	99	878
Unigene397_Taxus
Unigene398_Taxus
Unigene399_Taxus
Unigene400_Taxus	GQ03818_L03.1	1	181	358	178	160/181		6e-48	88	192	clone=GQ03818_L03 cluster=GQ03818_L03 status=complete gb=BT117398	GQ03818_L03.1	1	181	358	178	160/181		1e-48	88	192	clone=GQ03818_L03 cluster=GQ03818_L03 status=complete gb=BT117398	contig30868	2e-09	100	61.9	length=299 numreads=2
Unigene401_Taxus																							contig22224	0	98	961	length=594 numreads=4
Unigene402_Taxus
Unigene403_Taxus
Unigene404_Taxus																												contig05622	4e-10	85	63.9	length=430 numreads=2
Unigene405_Taxus
Unigene406_Taxus																							contig30042	1e-145	97	511	length=669 numreads=7
Unigene407_Taxus	GQ03311_D03.1	273	783	723	213	427/511		5e-94	83	347	clone=GQ03311_D03 cluster=GQ03708_P02 status=complete	GQ03708_P02.1	284	783	756	257	415/500		8e-86	83	317	clone=GQ03708_P02 cluster=GQ03708_P02 status=complete gb=BT115923	contig09845	0	99	1643	length=1229 numreads=24	contig06718	0	99	1370	length=771 numreads=5
Unigene408_Taxus
Unigene409_Taxus	GQ03312_A14.1	2	181	466	645	164/180		2e-58	91	230	clone=GQ03312_A14 cluster=GQ03312_A14 status=complete gb=BT112206	GQ03312_A14.1	2	181	466	645	164/180		3e-59	91	230	clone=GQ03312_A14 cluster=GQ03312_A14 status=complete gb=BT112206	contig11309	0	99	1439	length=738 numreads=12	contig02541	1e-65	84	250	length=398 numreads=2
Unigene410_Taxus	WS00838_P22.1	619	830	109	320	186/212		5e-54	87	214	clone=WS00838_P22 cluster=GQ03205_I21 status=complete	GQ03205_I21.1	253	611	5	363	295/359	5' read(F)	9e-52	82	204	clone=GQ03205_I21 cluster=GQ03205_I21 status=complete gb=BT109180	contig12268	0	99	1511	length=1136 numreads=21
Unigene411_Taxus	GQ0187_B07.1	668	699	63	94	32/32		1e-08	100	63.9	clone=GQ0187_B07 cluster=GQ0187_B07 status=3	GQ0187_B07.1	668	699	63	94	32/32		2e-09	100	63.9	clone=GQ0187_B07 cluster=GQ0187_B07 status=3	contig13986	0	98	1390	length=1335 numreads=29
Unigene412_Taxus	GQ03012_C13.3	481	653	379	551	144/173		2e-23	83	113	clone=GQ03012_C13 cluster=GQ03012_C13 status=complete gb=BT106847	GQ03012_C13.3	481	653	379	551	144/173		4e-24	83	113	clone=GQ03012_C13 cluster=GQ03012_C13 status=complete gb=BT106847	contig16805	0	99	2664	length=1445 numreads=20	contig01040	0	99	833	length=481 numreads=4
Unigene413_Taxus	WS00729_F13.1	595	1101	560	54	424/507		5e-94	83	347	clone=WS00729_F13 cluster=GQ02817_F10 status=complete	GQ02817_F10.1	595	1101	595	89	421/507		1e-87	83	323	clone=GQ02817_F10 cluster=GQ02817_F10 status=complete gb=BT104983	contig05588	0	98	1953	length=1211 numreads=46	FXAT9O003DDCR4	0	98	841
Unigene414_Taxus	GQ03812_H14.1	276	358	380	462	72/83		1e-12	86	77.8	clone=GQ03812_H14 cluster=GQ03812_H14 status=complete gb=BT117086	GQ03812_H14.1	276	358	380	462	72/83		2e-13	86	77.8	clone=GQ03812_H14 cluster=GQ03812_H14 status=complete gb=BT117086	contig14922	0	99	1590	length=826 numreads=32
Unigene415_Taxus																							contig28388	6e-58	99	222	length=753 numreads=11
Unigene416_Taxus	GQ04102_M14.1	254	818	735	1299	466/565		2e-90	82	335	clone=GQ04102_M14 cluster=GQ04102_M14 status=complete gb=BT119220	GQ04102_M14.1	254	818	735	1299	466/565		3e-91	82	335	clone=GQ04102_M14 cluster=GQ04102_M14 status=complete gb=BT119220	contig20461	0	99	1376	length=714 numreads=7	contig04582	0	97	670	length=374 numreads=2
Unigene417_Taxus																							contig25708	2e-96	99	351	length=589 numreads=5
Unigene418_Taxus																												FXAT9O003C9ZG5	7e-83	95	303
Unigene419_Taxus
Unigene420_Taxus
Unigene421_Taxus																												FXAT9O003DBG4G	1e-105	95	379
Unigene422_Taxus																												FXAT9O003CYGIV	2e-59	100	226
Unigene423_Taxus																							contig21254	1e-21	89	101	length=1001 numreads=56
Unigene424_Taxus																							contig23550	0	98	989	length=1870 numreads=33	contig06889	1e-69	99	262	length=362 numreads=3
Unigene425_Taxus
Unigene426_Taxus	GQ03501_O16.1	529	1287	553	1311	645/759		1e-170	84	601	clone=GQ03501_O16 cluster=GQ03501_O16 status=complete gb=BT113813	GQ03501_O16.1	529	1287	553	1311	645/759		1e-171	84	601	clone=GQ03501_O16 cluster=GQ03501_O16 status=complete gb=BT113813	contig18791	0	98	1542	length=1613 numreads=24	contig01042	0	88	676	length=617 numreads=11
Unigene427_Taxus	GQ04113_M16.2	106	358	777	525	215/253		4e-50	84	200	clone=GQ04113_M16 cluster=GQ04113_M16 status=complete gb=BT119991	GQ04113_M16.2	106	358	777	525	215/253		7e-51	84	200	clone=GQ04113_M16 cluster=GQ04113_M16 status=complete gb=BT119991	contig29780	1e-159	99	559	length=376 numreads=3
Unigene428_Taxus	GQ03519_J04.1	162	529	805	438	319/368		1e-92	86	341	clone=GQ03519_J04 cluster=GQ03216_F22 status=complete	GQ03216_F22.1	162	529	832	465	316/368		4e-86	85	317	clone=GQ03216_F22 cluster=GQ03216_F22 status=complete gb=BT110102
Unigene429_Taxus	GQ03216_L21.1	141	264	588	465	103/124		9e-14	83	79.8	clone=GQ03216_L21 cluster=GQ03216_L21 status=complete gb=BT110126	GQ03216_L21.1	141	264	588	465	103/124		2e-14	83	79.8	clone=GQ03216_L21 cluster=GQ03216_L21 status=complete gb=BT110126						contig06317	9e-97	96	351	length=289 numreads=2
Unigene430_Taxus																							contig30322	2e-48	99	190	length=386 numreads=3
Unigene431_Taxus
Unigene432_Taxus	WS00724_F15.1	599	675	167	91	66/77		2e-09	85	65.9	clone=WS00724_F15 cluster=GQ03807_J24 status=3	GQ03807_J24.1	599	675	781	857	66/77		5e-10	85	65.9	clone=GQ03807_J24 cluster=GQ03807_J24 status=complete gb=BT116839	contig14564	0	99	2058	length=1104 numreads=62
Unigene433_Taxus	GQ04105_B15.1	919	1129	808	1018	173/212		4e-18	81	95.6	clone=GQ04105_B15 cluster=GQ04105_B15 status=complete gb=BT119401	GQ04105_B15.1	919	1129	808	1018	173/212		8e-19	81	95.6	clone=GQ04105_B15 cluster=GQ04105_B15 status=complete gb=BT119401	contig03441	0	98	1957	length=1059 numreads=20	contig01979	0	97	876	length=509 numreads=2
Unigene434_Taxus																							contig06180	0	98	670	length=627 numreads=6	FXAT9O003C1P0S	1e-110	96	396
Unigene435_Taxus																							contig20116	2e-36	100	151	length=669 numreads=7	FXAT9O003CZTRL	3e-51	100	198
Unigene436_Taxus	WS0321_M05.1	55	203	622	479	127/149		8e-27	85	121	clone=WS0321_M05 cluster=WS0321_M05 status=3	WS0321_M05.1	55	203	622	479	127/149		2e-27	85	121	clone=WS0321_M05 cluster=WS0321_M05 status=3
Unigene437_Taxus	GQ03227_K04.1	492	769	479	202	232/278		7e-46	83	186	clone=GQ03227_K04 cluster=GQ03612_A15 status=5	GQ03519_O21.1	498	769	1537	1266	218/272		6e-24	80	111	clone=GQ03519_O21 cluster=GQ03519_O21 status=complete gb=BT114724	contig14437	0	98	888	length=1077 numreads=39	contig02547	1e-179	98	624	length=679 numreads=4
Unigene438_Taxus	GQ03705_M16.1	211	427	567	783	183/217		3e-38	84	161	clone=GQ03705_M16 cluster=GQ03126_I17 status=complete	GQ03126_I17.1	211	427	1012	1228	183/217		7e-39	84	161	clone=GQ03126_I17 cluster=GQ03126_I17 status=complete gb=BT108748
Unigene439_Taxus
Unigene440_Taxus
Unigene441_Taxus																							contig05152	8e-45	100	178	length=422 numreads=8
Unigene442_Taxus	WS00829_C14.1	609	1075	1	465	412/467	5' read(F)	1e-135	88	484	clone=WS00829_C14 cluster=WS00829_C14 status=3	WS00829_C14.1	609	1075	1	465	412/467	5' read(F)	1e-136	88	484	clone=WS00829_C14 cluster=WS00829_C14 status=3	contig09664	0	98	1955	length=1448 numreads=59	contig04280	0	99	1170	length=618 numreads=6
Unigene443_Taxus																												FXAT9O003DGE9M	2e-23	81	107
Unigene444_Taxus																							contig13522	3e-47	96	186	length=675 numreads=27
Unigene445_Taxus																							contig35284	7e-39	95	159	length=680 numreads=15	FXAT9O003C4JNK	1e-25	89	113
Unigene446_Taxus	GQ0162_D03.1	227	401	567	393	156/175		4e-49	89	196	clone=GQ0162_D03 cluster=GQ0162_D03 status=complete gb=BT102001	GQ0162_D03.1	227	401	567	393	156/175		7e-50	89	196	clone=GQ0162_D03 cluster=GQ0162_D03 status=complete gb=BT102001	contig05195	1e-137	99	488	length=828 numreads=10
Unigene447_Taxus	GQ01311_I12.1	26	440	611	197	346/415		8e-73	83	276	clone=GQ01311_I12 cluster=GQ02802_J18 status=5												contig20760	1e-149	98	527	length=954 numreads=17	FXAT9O003CXP4B	1e-136	99	482
Unigene448_Taxus	WS00740_B15.1	246	434	594	406	163/189		3e-40	86	168	clone=WS00740_B15 cluster=GQ03507_B14 status=3	GQ03507_B14.1	246	434	1200	1012	162/189		1e-38	85	161	clone=GQ03507_B14 cluster=GQ03507_B14 status=complete gb=BT114052	contig12343	0	99	1453	length=955 numreads=18	contig02595	0	99	2444	length=1485 numreads=12
Unigene449_Taxus	GQ03116_O23.1	1625	1878	387	640	209/254		2e-33	82	147	clone=GQ03116_O23 cluster=GQ03116_O23 status=complete gb=BT108106	GQ03116_O23.1	1625	1878	387	640	209/254		4e-34	82	147	clone=GQ03116_O23 cluster=GQ03116_O23 status=complete gb=BT108106	contig32934	0	99	4544	length=2412 numreads=86	contig02422	0	99	4522	length=2377 numreads=45
Unigene450_Taxus																							contig18637	5e-47	100	186	length=863 numreads=69
Unigene451_Taxus																							contig12394	1e-130	96	462	length=1863 numreads=88	contig01049	1e-97	97	353	length=1784 numreads=28
Unigene452_Taxus																							contig27385	8e-51	100	198	length=471 numreads=4
Unigene453_Taxus	GQ02823_E02.1	2	100	192	95	90/99		4e-25	90	117	clone=GQ02823_E02 cluster=GQ02823_E02 status=complete gb=BT105484	GQ02823_E02.1	2	100	192	95	90/99		8e-26	90	117	clone=GQ02823_E02 cluster=GQ02823_E02 status=complete gb=BT105484	contig14383	1e-79	100	295	length=882 numreads=19
Unigene454_Taxus	GQ04107_B12.1	1133	1746	869	256	501/615	3' read(R)	2e-79	81	299	clone=GQ04107_B12 cluster=GQ02802_J02 status=5	GQ02802_J02.4	1133	1746	1187	574	501/615		4e-80	81	299	clone=GQ02802_J02 cluster=GQ02802_J02 status=complete gb=BT103812	contig08936	0	99	3273	length=1717 numreads=25
Unigene455_Taxus	GQ03320_J06.1	1866	2571	402	1101	591/706		1e-136	83	490	clone=GQ03320_J06 cluster=GQ03320_J06 status=complete gb=BT112761	GQ03320_J06.1	1866	2571	402	1101	591/706		1e-137	83	490	clone=GQ03320_J06 cluster=GQ03320_J06 status=complete gb=BT112761	contig04995	0	98	1945	length=1113 numreads=35	FXAT9O003C145R	0	98	936
Unigene456_Taxus																							contig27762	6e-93	97	339	length=703 numreads=8
Unigene457_Taxus	GQ02806_M07.4	335	488	598	445	135/154		2e-36	87	155	clone=GQ02806_M07 cluster=GQ02806_M07 status=complete gb=BT104130	GQ02806_M07.4	335	488	598	445	135/154		3e-37	87	155	clone=GQ02806_M07 cluster=GQ02806_M07 status=complete gb=BT104130	contig03067	5e-48	99	190	length=677 numreads=22
Unigene458_Taxus
Unigene459_Taxus																							contig11224	1e-169	98	593	length=561 numreads=18	contig07578	1e-122	92	434	length=822 numreads=30
Unigene460_Taxus
Unigene461_Taxus	GQ03119_N21.1	462	642	764	584	154/181		7e-33	85	145	clone=GQ03119_N21 cluster=GQ03119_N21 status=complete gb=BT108308	GQ03119_N21.1	462	642	764	584	154/181		1e-33	85	145	clone=GQ03119_N21 cluster=GQ03119_N21 status=complete gb=BT108308	contig09224	0	99	1225	length=1542 numreads=26
Unigene462_Taxus																							contig14115	5e-06	91	50.1	length=1672 numreads=32
Unigene463_Taxus																							contig29752	7e-65	98	246	length=317 numreads=2
Unigene464_Taxus	GQ04012_M16.1	959	1145	662	848	166/187	3' read(F)	5e-51	88	204	clone=GQ04012_M16 cluster=GQ03322_F14 status=5	GQ03322_F14.1	959	1145	1017	1203	166/187		9e-52	88	204	clone=GQ03322_F14 cluster=GQ03322_F14 status=complete gb=BT112888	contig34580	0	96	737	length=1045 numreads=7	contig06817	1e-07	90	56	length=374 numreads=2
Unigene465_Taxus																							contig20701	6e-61	100	232	length=937 numreads=66
Unigene466_Taxus
Unigene467_Taxus	GQ03513_I11.1	1602	2855	1	1254	1113/1254	5' read(F)	0	88	1368	clone=GQ03513_I11 cluster=GQ03513_I11 status=complete gb=BT114378	GQ03513_I11.1	1602	2855	1	1254	1113/1254	5' read(F)	0	88	1368	clone=GQ03513_I11 cluster=GQ03513_I11 status=complete gb=BT114378	contig23903	0	99	1172	length=607 numreads=10	FXAT9O003DBS2B	0	97	846
Unigene468_Taxus																							contig30162	1e-43	95	174	length=125 numreads=4
Unigene469_Taxus	WS02614_B16.1	170	747	49	626	490/581		1e-117	84	422	clone=WS02614_B16 cluster=GQ0034_O15 status=complete	GQ0034_O15.1	170	747	132	709	490/581		1e-117	84	422	clone=GQ0034_O15 cluster=GQ0034_O15 status=complete gb=BT100644	contig00915	0	98	1465	length=1185 numreads=42	contig02352	0	99	959	length=545 numreads=4
Unigene470_Taxus																							contig30402	0	97	670	length=395 numreads=3	FXAT9O003DDBEC	2e-62	81	238
Unigene471_Taxus	GQ04110_G15.1	123	187	508	444	58/65		2e-12	89	73.8	clone=GQ04110_G15 cluster=GQ0223_C18 status=complete	GQ0223_C18.1	123	187	233	297	58/65		3e-13	89	73.8	clone=GQ0223_C18 cluster=GQ0223_C18 status=complete gb=BT103277	contig19212	5e-98	97	355	length=735 numreads=25	contig02941	6e-09	83	58	length=425 numreads=7
Unigene472_Taxus																							contig20664	0	99	1370	length=746 numreads=19	contig02317	8e-61	87	232	length=991 numreads=11
Unigene473_Taxus	GQ04109_O20.1	538	600	517	579	58/63		2e-15	92	85.7	clone=GQ04109_O20 cluster=GQ03213_B01 status=5	GQ03213_B01.1	538	600	517	579	58/63		3e-16	92	85.7	clone=GQ03213_B01 cluster=GQ03213_B01 status=complete gb=BT109856	contig11868	6e-11	92	67.9	length=994 numreads=82	FXAT9O003DHR8W	0	97	646
Unigene474_Taxus
Unigene475_Taxus	GQ04013_O02.1	171	267	1708	1612	84/97		4e-17	86	89.7	clone=GQ04013_O02 cluster=GQ04013_O02 status=complete gb=BT119053	GQ04013_O02.1	171	267	1708	1612	84/97		7e-18	86	89.7	clone=GQ04013_O02 cluster=GQ04013_O02 status=complete gb=BT119053						FXAT9O003DNIBF	3e-51	100	198
Unigene476_Taxus																							contig22428	1e-104	97	379	length=541 numreads=46	FXAT9O003DMNUX	6e-78	98	289
Unigene477_Taxus																							contig14928	3e-07	83	54	length=827 numreads=10
Unigene478_Taxus
Unigene479_Taxus	WS00823_N18.1	280	484	249	453	173/205		1e-35	84	153	clone=WS00823_N18 cluster=GQ03719_O16 status=complete	GQ03719_O16.1	280	484	1485	1689	171/205		1e-31	83	137	clone=GQ03719_O16 cluster=GQ03719_O16 status=complete gb=BT116503	contig04400	1e-136	99	484	length=1526 numreads=19
Unigene480_Taxus																							contig35259	0	96	771	length=536 numreads=68
Unigene481_Taxus
Unigene482_Taxus
Unigene483_Taxus																							contig24737	1e-153	98	541	length=406 numreads=19	contig05232	1e-15	82	81.8	length=670 numreads=6
Unigene484_Taxus	GQ04112_F19.4	13	146	1413	1545	111/134		4e-13	82	75.8	clone=GQ04112_F19 cluster=GQ04112_F19 status=53	GQ04112_F19.4	13	146	1413	1545	111/134		8e-14	82	75.8	clone=GQ04112_F19 cluster=GQ04112_F19 status=53						contig04500	4e-07	86	52	length=254 numreads=2
Unigene485_Taxus
Unigene486_Taxus	WS03223_E17.1	335	442	583	476	96/108		8e-26	88	119	clone=WS03223_E17 cluster=GQ04004_M04 status=3	GQ04004_M04.1	335	442	1095	988	96/108		1e-26	88	119	clone=GQ04004_M04 cluster=GQ04004_M04 status=complete gb=BT118292	contig32467	8e-68	100	256	length=593 numreads=53
Unigene487_Taxus																							contig34521	3e-93	93	339	length=846 numreads=20	FXAT9O003DJ76T	6e-80	93	293
Unigene488_Taxus																							contig23271	2e-48	99	190	length=512 numreads=6
Unigene489_Taxus																							contig06556	0	99	1562	length=1099 numreads=12	FXAT9O003C0XXW	1e-145	98	511
Unigene490_Taxus
Unigene491_Taxus	GQ03228_G15.1	719	1112	523	130	339/394		3e-93	86	345	clone=GQ03228_G15 cluster=GQ03228_G15 status=complete gb=BT110822	GQ03228_G15.1	719	1112	523	130	339/394		6e-94	86	345	clone=GQ03228_G15 cluster=GQ03228_G15 status=complete gb=BT110822	contig18079	0	97	1199	length=1002 numreads=19	contig06874	1e-179	98	626	length=350 numreads=2
Unigene492_Taxus																							contig26074	1e-93	99	341	length=485 numreads=4
Unigene493_Taxus	GQ02820_I12.1	42	100	7	65	52/59	5' read(F)	7e-09	88	61.9	clone=GQ02820_I12 cluster=GQ02820_I12 status=complete gb=BT105285	GQ02820_I12.1	42	100	7	65	52/59	5' read(F)	1e-09	88	61.9	clone=GQ02820_I12 cluster=GQ02820_I12 status=complete gb=BT105285	contig11977	3e-10	91	63.9	length=744 numreads=26	FXAT9O003DENA9	2e-12	89	69.9
Unigene494_Taxus																												contig02083	7e-06	83	48.1	length=1204 numreads=10
Unigene495_Taxus																							contig02060	6e-89	96	325	length=1519 numreads=40
Unigene496_Taxus																							contig10426	9e-20	87	95.6	length=1704 numreads=27
Unigene497_Taxus																												FXAT9O003DKP8E	8e-29	98	125
Unigene498_Taxus																							contig19293	2e-48	99	190	length=715 numreads=6
Unigene499_Taxus
Unigene500_Taxus																							contig05604	2e-59	99	228	length=496 numreads=20
Unigene501_Taxus	GQ02902_M04.2	568	625	767	824	56/58		1e-19	96	99.6	clone=GQ02902_M04 cluster=GQ02902_M04 status=complete gb=BT106091	GQ02902_M04.2	568	625	767	824	56/58		2e-20	96	99.6	clone=GQ02902_M04 cluster=GQ02902_M04 status=complete gb=BT106091	contig25541	6e-57	100	220	length=1716 numreads=19
Unigene502_Taxus																												FXAT9O003DI3ME	1e-47	83	188
Unigene503_Taxus																							contig04846	8e-51	100	198	length=1384 numreads=60
Unigene504_Taxus	GQ03213_D12.1	625	1292	349	1010	563/668		1e-138	84	494	clone=GQ03213_D12 cluster=GQ03213_D12 status=complete gb=BT109873	GQ03213_D12.1	625	1292	349	1010	563/668		1e-139	84	494	clone=GQ03213_D12 cluster=GQ03213_D12 status=complete gb=BT109873	contig20914	0	98	1285	length=684 numreads=30	FXAT9O003C4VOT	0	97	868
Unigene505_Taxus	GQ0205_I13.1	1145	1614	470	1	406/470	5' read(R)	1e-117	86	424	clone=GQ0205_I13 cluster=GQ0205_I13 status=complete gb=BT103043	GQ0205_I13.1	1145	1614	470	1	406/470	5' read(R)	1e-117	86	424	clone=GQ0205_I13 cluster=GQ0205_I13 status=complete gb=BT103043	contig18127	0	99	2165	length=1969 numreads=68
Unigene506_Taxus																												contig02179	9e-35	88	145	length=521 numreads=5
Unigene507_Taxus																							contig15970	2e-64	94	244	length=587 numreads=31
Unigene508_Taxus																							contig25222	4e-46	99	184	length=625 numreads=4
Unigene509_Taxus	GQ03124_O24.1	109	417	394	86	255/309		2e-45	82	184	clone=GQ03124_O24 cluster=GQ03001_I16 status=5	GQ03001_I16.1	109	417	393	85	254/309		9e-44	82	176	clone=GQ03001_I16 cluster=GQ03001_I16 status=complete gb=BT106431	contig07959	1e-156	92	551	length=1132 numreads=98	contig02079	1e-162	93	567	length=567 numreads=12
Unigene510_Taxus																							contig17232	5e-93	97	339	length=1099 numreads=21
Unigene511_Taxus
Unigene512_Taxus
Unigene513_Taxus																							contig00605	1e-111	100	398	length=734 numreads=33	contig05211	1e-20	100	97.6	length=265 numreads=2
Unigene514_Taxus	GQ04007_F12.1	52	263	110	321	176/212		7e-31	83	135	clone=GQ04007_F12 cluster=GQ03809_P07 status=5	GQ03809_P07.1	52	263	296	507	176/212		1e-31	83	135	clone=GQ03809_P07 cluster=GQ03809_P07 status=complete gb=BT116944	contig26063	1e-140	98	496	length=1437 numreads=46
Unigene515_Taxus	WS00726_A07.1	160	347	237	420	160/190		1e-30	84	135	clone=WS00726_A07 cluster=GQ03510_A06 status=3	GQ03510_A06.1	160	347	1217	1400	160/190		2e-31	84	135	clone=GQ03510_A06 cluster=GQ03510_A06 status=complete gb=BT114194	contig23190	9e-92	95	335	length=1331 numreads=18
Unigene516_Taxus
Unigene517_Taxus	WS00738_A11.1	34	283	620	371	203/250		5e-27	81	123	clone=WS00738_A11 cluster=GQ03302_M16 status=3												contig03101	1e-102	99	369	length=654 numreads=20	contig04608	1e-138	99	488	length=309 numreads=2
Unigene518_Taxus																							contig11922	3e-95	99	347	length=1803 numreads=51
Unigene519_Taxus	GQ04005_O05.1	1048	1146	711	809	84/99		7e-13	84	77.8	clone=GQ04005_O05 cluster=GQ04005_O05 status=complete gb=BT118389	GQ04005_O05.1	1048	1146	711	809	84/99		1e-13	84	77.8	clone=GQ04005_O05 cluster=GQ04005_O05 status=complete gb=BT118389	contig13191	2e-09	93	63.9	length=678 numreads=8
Unigene520_Taxus
Unigene521_Taxus																							contig16389	1e-141	94	500	length=1824 numreads=34	FXAT9O003DAKWM	1e-116	98	416
Unigene522_Taxus	GQ0165_G21.1	17	63	282	328	42/47		2e-06	89	54	clone=GQ0165_G21 cluster=GQ0165_G21 status=5	GQ0165_G21.1	17	63	282	328	42/47		3e-07	89	54	clone=GQ0165_G21 cluster=GQ0165_G21 status=5	contig26515	7e-08	92	56	length=462 numreads=3
Unigene523_Taxus	GQ0259_H12.1	127	281	35	189	126/155		2e-13	81	77.8	clone=GQ0259_H12 cluster=GQ0259_H12 status=complete gb=BT103621	GQ0259_H12.1	127	281	35	189	126/155		3e-14	81	77.8	clone=GQ0259_H12 cluster=GQ0259_H12 status=complete gb=BT103621	contig03399	2e-76	98	283	length=1133 numreads=9
Unigene524_Taxus	WS00725_D07.1	134	397	210	473	222/264		4e-47	84	190	clone=WS00725_D07 cluster=GQ03211_N23 status=complete	GQ03211_N23.1	134	397	993	1256	220/264		4e-43	83	174	clone=GQ03211_N23 cluster=GQ03211_N23 status=complete gb=BT109733	contig02685	1e-176	99	617	length=366 numreads=18	contig03397	1e-117	99	420	length=265 numreads=3
Unigene525_Taxus																							contig08415	2e-48	99	190	length=1315 numreads=53	FXAT9O003DK5O4	3e-51	100	198
Unigene526_Taxus	GQ02768_B05.1	356	558	369	571	166/203		9e-23	81	109	clone=GQ02768_B05 cluster=GQ04013_E17 status=5												contig09605	0	98	801	length=1761 numreads=45	contig01052	1e-143	100	505	length=320 numreads=2
Unigene527_Taxus																							contig32165	1e-25	90	115	length=276 numreads=3
Unigene528_Taxus	GQ00612_A23.1	1	339	78	416	290/339		4e-75	85	283	clone=GQ00612_A23 cluster=GQ03125_J16 status=complete	GQ03125_J16.1	1	153	157	5	131/153	5' read(R)	3e-29	85	129	clone=GQ03125_J16 cluster=GQ03125_J16 status=complete gb=BT108703
Unigene529_Taxus	WS03227_B12.1	464	727	287	24	238/264		3e-85	90	317	clone=WS03227_B12 cluster=GQ0204_G10 status=complete	GQ0204_G10.1	464	727	295	32	238/264		6e-86	90	317	clone=GQ0204_G10 cluster=GQ0204_G10 status=complete gb=BT102984	contig05341	0	98	1526	length=852 numreads=74	FXAT9O003CYJPZ	1e-178	97	622
Unigene530_Taxus	GQ03237_E11.1	664	1674	310	1323	889/1014		0	87	1015	clone=GQ03237_E11 cluster=GQ03237_E11 status=complete gb=BT111407	GQ03237_E11.1	664	1674	310	1323	889/1014		0	87	1015	clone=GQ03237_E11 cluster=GQ03237_E11 status=complete gb=BT111407	contig07096	0	99	1534	length=998 numreads=41	FXAT9O003C8BRR	1e-156	98	549
Unigene531_Taxus	GQ03109_N19.1	228	545	941	624	266/318		3e-55	83	218	clone=GQ03109_N19 cluster=GQ03225_N12 status=complete	GQ03225_N12.3	228	323	1795	1699	85/97		3e-17	87	89.7	clone=GQ03225_N12 cluster=GQ03225_N12 status=53	contig31253	1e-144	98	509	length=277 numreads=4
Unigene532_Taxus																							contig02324	2e-87	98	323	length=850 numreads=16	FXAT9O003C0JUK	8e-07	90	54
Unigene533_Taxus
Unigene534_Taxus	GQ02903_L05.1	145	304	728	569	132/160		2e-18	82	95.6	clone=GQ02903_L05 cluster=GQ02903_L05 status=complete gb=BT106136	GQ02903_L05.1	145	304	728	569	132/160		3e-19	82	95.6	clone=GQ02903_L05 cluster=GQ02903_L05 status=complete gb=BT106136	contig08608	1e-154	96	543	length=480 numreads=11	FXAT9O003C58FY	3e-13	87	73.8
Unigene535_Taxus	WS0312_D19.1	14	99	181	96	76/86		9e-18	88	91.7	clone=WS0312_D19 cluster=WS0312_D19 status=3	WS0312_D19.1	14	99	181	96	76/86		2e-18	88	91.7	clone=WS0312_D19 cluster=WS0312_D19 status=3	contig24674	8e-08	100	56	length=326 numreads=3	FXAT9O003CYLWC	1e-22	100	103
Unigene536_Taxus																							contig26811	2e-98	98	357	length=192 numreads=2	FXAT9O003DE74B	3e-09	87	60
Unigene537_Taxus																							contig00455	4e-43	97	172	length=851 numreads=11
Unigene538_Taxus																												FXAT9O003C1M3P	1e-122	99	436
Unigene539_Taxus																							contig15643	6e-26	93	117	length=2397 numreads=101
Unigene540_Taxus	GQ03616_C21.1	34	126	87	179	81/93		8e-17	87	89.7	clone=GQ03616_C21 cluster=GQ02809_A06 status=complete												contig25740	1e-122	100	436	length=517 numreads=6	FXAT9O003DLNX0	1e-127	99	452
Unigene541_Taxus
Unigene542_Taxus
Unigene543_Taxus																							contig16466	0	98	846	length=1134 numreads=10	FXAT9O003DOC4P	3e-75	98	280
Unigene544_Taxus	GQ04101_F06.1	14	101	4	91	74/88	5' read(F)	2e-09	84	63.9	clone=GQ04101_F06 cluster=GQ04101_F06 status=complete gb=BT119088	GQ04101_F06.1	14	101	4	91	74/88	5' read(F)	4e-10	84	63.9	clone=GQ04101_F06 cluster=GQ04101_F06 status=complete gb=BT119088	contig23060	2e-63	88	240	length=2097 numreads=60	FXAT9O003DN81A	1e-53	87	206
Unigene545_Taxus																							contig03910	5e-40	93	163	length=1086 numreads=39
Unigene546_Taxus	GQ03105_D21.1	15	90	426	501	69/76		5e-19	90	95.6	clone=GQ03105_D21 cluster=GQ03105_D21 status=complete gb=BT107275	GQ03105_D21.1	15	90	426	501	69/76		1e-19	90	95.6	clone=GQ03105_D21 cluster=GQ03105_D21 status=complete gb=BT107275
Unigene547_Taxus																							contig04635	3e-07	82	54	length=835 numreads=24	contig01730	1e-65	89	246	length=1274 numreads=22
Unigene548_Taxus	WS0322_A15.1	10	100	65	155	86/91		1e-32	94	141	clone=WS0322_A15 cluster=GQ03815_P06 status=complete	GQ03815_P06.1	10	100	1181	1271	86/91		2e-33	94	141	clone=GQ03815_P06 cluster=GQ03815_P06 status=complete gb=BT117253	contig20280	2e-63	93	240	length=386 numreads=3	FXAT9O003DJGCV	3e-23	90	105
Unigene549_Taxus	GQ03609_F10.1	7	83	491	415	70/77		5e-19	90	97.6	clone=GQ03609_F10 cluster=GQ03609_F10 status=complete gb=BT115103	GQ03609_F10.1	7	83	491	415	70/77		9e-20	90	97.6	clone=GQ03609_F10 cluster=GQ03609_F10 status=complete gb=BT115103	contig30513	5e-64	98	244	length=394 numreads=2
Unigene550_Taxus																							contig10964	2e-08	100	58	length=1726 numreads=55	contig04563	6e-09	100	58	length=668 numreads=5
Unigene551_Taxus	GQ03902_G17.2	16	68	1068	1016	49/53		1e-11	92	73.8	clone=GQ03902_G17 cluster=GQ03902_G17 status=5	GQ03902_G17.2	16	68	1068	1016	49/53		2e-12	92	73.8	clone=GQ03902_G17 cluster=GQ03902_G17 status=5	contig09544	2e-09	86	63.9	length=1402 numreads=66	contig03939	0	98	648	length=562 numreads=6
Unigene552_Taxus																							contig15577	9e-29	96	125	length=2335 numreads=61
Unigene553_Taxus
Unigene554_Taxus																							contig26997	8e-66	98	250	length=464 numreads=6	contig00563	2e-30	89	131	length=532 numreads=2
Unigene555_Taxus
Unigene556_Taxus	WS00816_F16.1	363	742	385	6	320/380	5' read(R)	6e-73	84	278	clone=WS00816_F16 cluster=WS00816_F16 status=3	WS00816_F16.1	363	742	385	6	320/380	5' read(R)	1e-73	84	278	clone=WS00816_F16 cluster=WS00816_F16 status=3	contig21041	0	98	1540	length=1588 numreads=21	contig04021	1e-156	98	549	length=795 numreads=6
Unigene557_Taxus																							contig24505	1e-133	97	474	length=430 numreads=3
Unigene558_Taxus	GQ03013_M13.1	29	210	41	222	158/182		1e-41	86	170	clone=GQ03013_M13 cluster=GQ0206_E11 status=complete	GQ0206_E11.1	29	210	222	403	158/182		2e-42	86	170	clone=GQ0206_E11 cluster=GQ0206_E11 status=complete gb=BT103082	contig00339	7e-88	94	321	length=742 numreads=27	contig05374	9e-79	92	289	length=727 numreads=5
Unigene559_Taxus
Unigene560_Taxus	WS03213_K10.1	779	969	592	402	170/191		2e-53	89	212	clone=WS03213_K10 cluster=GQ03313_I12 status=3	GQ03209_A13.2	797	969	1344	1172	156/173		4e-53	90	208	clone=GQ03209_A13 cluster=GQ03209_A13 status=complete gb=BT109485	contig04760	0	99	1154	length=1475 numreads=32	contig03294	1e-38	88	159	length=203 numreads=8
Unigene561_Taxus
Unigene562_Taxus	GQ04110_O09.1	220	311	165	256	76/92		8e-07	82	56	clone=GQ04110_O09 cluster=GQ02830_J15 status=5	GQ02830_J15.1	220	311	167	258	76/92		1e-07	82	56	clone=GQ02830_J15 cluster=GQ02830_J15 status=complete gb=BT105966
Unigene563_Taxus	GQ03512_J24.3	330	459	808	937	105/130		6e-08	80	60	clone=GQ03512_J24 cluster=GQ03512_J24 status=complete gb=BT114333	GQ03512_J24.3	330	459	808	937	105/130		1e-08	80	60	clone=GQ03512_J24 cluster=GQ03512_J24 status=complete gb=BT114333
Unigene564_Taxus																							contig11421	4e-71	91	268	length=429 numreads=3
Unigene565_Taxus																							contig09666	1e-109	97	392	length=754 numreads=36	contig07547	1e-110	98	396	length=390 numreads=38
Unigene566_Taxus
Unigene567_Taxus	GQ04012_I09.1	141	259	123	244	99/122		5e-07	81	56	clone=GQ04012_I09 cluster=GQ04012_I09 status=complete gb=BT118959	GQ04012_I09.1	141	259	123	244	99/122		1e-07	81	56	clone=GQ04012_I09 cluster=GQ04012_I09 status=complete gb=BT118959	contig16577	1e-119	95	424	length=1452 numreads=80	contig02592	9e-95	98	343	length=428 numreads=4
Unigene568_Taxus	WS03219_E05.1	465	765	429	129	244/301		4e-33	81	145	clone=WS03219_E05 cluster=GQ04007_O19 status=3	GQ04007_O19.1	465	765	847	547	244/301		8e-34	81	145	clone=GQ04007_O19 cluster=GQ04007_O19 status=complete gb=BT118578	contig11374	0	98	1665	length=1119 numreads=89
Unigene569_Taxus																							contig17751	0	98	952	length=1267 numreads=16	FXAT9O003DQD2K	0	98	666
Unigene570_Taxus	GQ02012_C22.1	1	29	853	825	29/29		1e-07	100	58	clone=GQ02012_C22 cluster=GQ02012_C22 status=3	GQ02012_C22.1	1	29	853	825	29/29		3e-08	100	58	clone=GQ02012_C22 cluster=GQ02012_C22 status=3	contig27339	9e-08	100	56	length=774 numreads=7	FXAT9O003C7ROE	3e-08	100	56
Unigene571_Taxus	GQ03609_F10.1	161	403	1663	1421	200/243		2e-32	82	141	clone=GQ03609_F10 cluster=GQ03609_F10 status=complete gb=BT115103	GQ03609_F10.1	161	403	1663	1421	200/243		4e-33	82	141	clone=GQ03609_F10 cluster=GQ03609_F10 status=complete gb=BT115103	contig23890	1e-148	99	523	length=1167 numreads=19
Unigene572_Taxus
Unigene573_Taxus	GQ03105_P01.1	979	1365	2	388	331/387	5' read(F)	1e-86	85	323	clone=GQ03105_P01 cluster=GQ03105_P01 status=complete gb=BT107338	GQ03105_P01.1	979	1365	2	388	331/387	5' read(F)	2e-87	85	323	clone=GQ03105_P01 cluster=GQ03105_P01 status=complete gb=BT107338	contig06825	0	98	2444	length=1690 numreads=26
Unigene574_Taxus																							contig25584	5e-46	98	182	length=1131 numreads=52
Unigene575_Taxus																							contig12490	0	99	1467	length=1377 numreads=14
Unigene576_Taxus																							contig14545	1e-48	97	192	length=1176 numreads=9	contig00974	2e-51	98	200	length=1200 numreads=132
Unigene577_Taxus	WS03214_M24.1	284	531	351	104	219/248		1e-68	88	262	clone=WS03214_M24 cluster=GQ02808_N01 status=complete	GQ02808_N01.1	284	531	497	251	218/248		2e-64	87	246	clone=GQ02808_N01 cluster=GQ02808_N01 status=complete gb=BT104309	contig03450	0	97	1340	length=971 numreads=55	contig04727	0	97	870	length=483 numreads=4
Unigene578_Taxus
Unigene579_Taxus	WS0338_M10.1	1	86	98	13	76/86		8e-18	88	91.7	clone=WS0338_M10 cluster=WS0336_H05 status=3	WS0336_H05.1	1	86	100	15	76/86		1e-18	88	91.7	clone=WS0336_H05 cluster=WS0336_H05 status=3	contig04217	2e-48	100	190	length=1808 numreads=60
Unigene580_Taxus																							contig18630	0	97	726	length=770 numreads=14	contig02891	1e-71	94	268	length=601 numreads=4
Unigene581_Taxus																							contig16774	0	98	916	length=1561 numreads=54	contig01530	1e-180	97	626	length=506 numreads=2
Unigene582_Taxus	GQ02812_G01.3	153	269	766	651	98/117		2e-11	83	73.8	clone=GQ02812_G01 cluster=GQ02812_G01 status=53	GQ02812_G01.3	153	269	766	651	98/117		5e-12	83	73.8	clone=GQ02812_G01 cluster=GQ02812_G01 status=53	contig26994	0	99	1691	length=877 numreads=12	FXAT9O003DFGXQ	0	98	652
Unigene583_Taxus																												FXAT9O003DMHQ1	8e-12	92	67.9
Unigene584_Taxus
Unigene585_Taxus																							contig29598	1e-147	99	521	length=275 numreads=2	FXAT9O003CYTNI	0	99	860
Unigene586_Taxus																							contig13408	1e-166	97	583	length=682 numreads=26
Unigene587_Taxus																							contig13702	1e-50	100	198	length=836 numreads=35
Unigene588_Taxus																							contig01881	6e-06	93	50.1	length=1665 numreads=72
Unigene589_Taxus																							contig22816	0	97	686	length=619 numreads=9
Unigene590_Taxus	GQ0067_O11.2	437	560	1260	1382	105/124		3e-16	84	87.7	clone=GQ0067_O11 cluster=GQ0067_O11 status=complete gb=BT101114	GQ0067_O11.2	437	560	1260	1382	105/124		6e-17	84	87.7	clone=GQ0067_O11 cluster=GQ0067_O11 status=complete gb=BT101114	contig00155	1e-166	96	583	length=1932 numreads=43
Unigene591_Taxus																							contig13509	1e-115	94	414	length=1105 numreads=98
Unigene592_Taxus																							contig30039	1e-114	97	414	length=241 numreads=2	FXAT9O003C53QB	1e-32	95	141
Unigene593_Taxus
Unigene594_Taxus																							contig14382	4e-25	91	113	length=1316 numreads=25
Unigene595_Taxus	GQ03805_P11.1	1445	1480	1367	1332	35/36		3e-08	97	63.9	clone=GQ03805_P11 cluster=GQ03805_P11 status=complete gb=BT116749	GQ03805_P11.1	1445	1480	1367	1332	35/36		5e-09	97	63.9	clone=GQ03805_P11 cluster=GQ03805_P11 status=complete gb=BT116749	contig21657	0	98	2942	length=1552 numreads=32	contig05613	0	99	1187	length=614 numreads=5
Unigene596_Taxus	GQ0161_I09.1	146	596	588	1038	395/451		1e-125	87	450	clone=GQ0161_I09 cluster=GQ0161_I09 status=complete gb=BT101991	GQ0161_I09.1	146	596	588	1038	395/451		1e-126	87	450	clone=GQ0161_I09 cluster=GQ0161_I09 status=complete gb=BT101991	contig15864	1e-107	100	389	length=196 numreads=6	FXAT9O003C2A5Z	1e-151	99	533
Unigene597_Taxus																							contig19721	5e-96	100	349	length=1142 numreads=15
Unigene598_Taxus
Unigene599_Taxus	GQ03226_P12.1	389	1279	3	894	745/892	5' read(F)	1e-168	83	595	clone=GQ03226_P12 cluster=GQ03226_P12 status=complete gb=BT110722	GQ03226_P12.1	389	1279	3	894	745/892	5' read(F)	1e-169	83	595	clone=GQ03226_P12 cluster=GQ03226_P12 status=complete gb=BT110722	contig04036	0	99	2127	length=2362 numreads=91	FXAT9O003CWVT6	1e-130	96	464
Unigene600_Taxus																							contig26909	2e-48	99	190	length=766 numreads=8
Unigene601_Taxus																							contig20567	8e-54	100	208	length=982 numreads=11
Unigene602_Taxus	GQ03006_O07.1	101	204	47	150	90/104		7e-19	86	95.6	clone=GQ03006_O07 cluster=GQ03006_O07 status=complete gb=BT106635	GQ03006_O07.1	101	204	47	150	90/104		1e-19	86	95.6	clone=GQ03006_O07 cluster=GQ03006_O07 status=complete gb=BT106635	contig19533	1e-147	97	517	length=748 numreads=5	FXAT9O003DFU9V	1e-10	83	63.9
Unigene603_Taxus																							contig12874	0	98	1120	length=676 numreads=11
Unigene604_Taxus
Unigene605_Taxus	WS00743_E18.1	165	191	563	589	27/27		2e-06	100	54	clone=WS00743_E18 cluster=WS00743_E18 status=3	WS00743_E18.1	165	191	563	589	27/27		3e-07	100	54	clone=WS00743_E18 cluster=WS00743_E18 status=3	contig27339	4e-06	100	50.1	length=774 numreads=7	FXAT9O003DPGSA	3e-08	96	56
Unigene606_Taxus																							contig12556	5e-70	92	264	length=1571 numreads=25	FXAT9O003DGCN0	2e-63	100	240
Unigene607_Taxus	GQ03207_I20.1	449	580	5	136	111/132	5' read(F)	1e-18	84	95.6	clone=GQ03207_I20 cluster=GQ03207_I20 status=complete gb=BT109354	GQ03207_I20.1	449	580	5	136	111/132	5' read(F)	3e-19	84	95.6	clone=GQ03207_I20 cluster=GQ03207_I20 status=complete gb=BT109354
Unigene608_Taxus
Unigene609_Taxus																							contig28037	3e-64	99	244	length=716 numreads=5	contig06295	1e-128	98	456	length=295 numreads=2
Unigene610_Taxus	GQ03221_C12.1	47	100	1567	1620	49/54		1e-10	90	67.9	clone=GQ03221_C12 cluster=GQ03221_C12 status=complete gb=BT110396	GQ03221_C12.1	47	100	1567	1620	49/54		2e-11	90	67.9	clone=GQ03221_C12 cluster=GQ03221_C12 status=complete gb=BT110396
Unigene611_Taxus																							contig03792	4e-27	92	121	length=946 numreads=44
Unigene612_Taxus
Unigene613_Taxus
Unigene614_Taxus
Unigene615_Taxus	WS02626_C14.1	396	520	445	321	118/125		8e-48	94	192	clone=WS02626_C14 cluster=GQ04110_K22 status=complete	GQ0192_A13.1	396	568	1326	1154	151/173		2e-41	87	168	clone=GQ0192_A13 cluster=GQ0192_A13 status=complete gb=BT102422	contig27989	1e-164	95	575	length=542 numreads=4	contig02624	6e-70	91	262	length=1715 numreads=12
Unigene616_Taxus
Unigene617_Taxus	GQ0255_E06.1	212	631	1947	1530	357/420		3e-88	85	327	clone=GQ0255_E06 cluster=GQ03313_O18 status=53												contig28457	0	99	1120	length=749 numreads=9
Unigene618_Taxus
Unigene619_Taxus	GQ03121_I04.1	275	427	1362	1213	133/153		2e-32	86	141	clone=GQ03121_I04 cluster=GQ03121_I04 status=complete gb=BT108417	GQ03121_I04.1	275	427	1362	1213	133/153		4e-33	86	141	clone=GQ03121_I04 cluster=GQ03121_I04 status=complete gb=BT108417	contig18696	1e-155	97	547	length=993 numreads=9
Unigene620_Taxus																												FXAT9O003DJVFW	6e-64	94	242
Unigene621_Taxus
Unigene622_Taxus	GQ03712_D18.1	445	531	7	93	75/87	5' read(F)	3e-13	86	77.8	clone=GQ03712_D18 cluster=GQ03712_D18 status=complete gb=BT116122	GQ03712_D18.1	445	531	7	93	75/87	5' read(F)	6e-14	86	77.8	clone=GQ03712_D18 cluster=GQ03712_D18 status=complete gb=BT116122						FXAT9O003DDGKA	2e-70	96	264
Unigene623_Taxus
Unigene624_Taxus
Unigene625_Taxus																							contig06036	0	91	1066	length=1372 numreads=47	FXAT9O003DANDB	0	99	688
Unigene626_Taxus																							contig14783	2e-27	95	121	length=1361 numreads=49	FXAT9O003C99TH	6e-28	95	121
Unigene627_Taxus
Unigene628_Taxus
Unigene629_Taxus	WS03218_A04.1	37	94	138	81	53/58		8e-13	91	75.8	clone=WS03218_A04 cluster=WS03218_A04 status=3	WS03218_A04.1	37	94	138	81	53/58		1e-13	91	75.8	clone=WS03218_A04 cluster=WS03218_A04 status=3						FXAT9O003DCMXJ	1e-165	97	579
Unigene630_Taxus	GQ03811_O24.1	213	627	773	359	364/415		1e-116	87	418	clone=GQ03811_O24 cluster=GQ03811_O24 status=complete gb=BT117057	GQ03811_O24.1	213	627	773	359	364/415		1e-116	87	418	clone=GQ03811_O24 cluster=GQ03811_O24 status=complete gb=BT117057	contig27184	1e-127	98	454	length=613 numreads=11
Unigene631_Taxus	WS03214_L21.1	443	477	80	46	33/35		5e-06	94	54	clone=WS03214_L21 cluster=GQ0133_L21 status=3	GQ0133_L21.1	443	477	121	87	33/35		9e-07	94	54	clone=GQ0133_L21 cluster=GQ0133_L21 status=complete gb=BT101937	contig32911	0	98	888	length=663 numreads=39	contig04121	1e-108	99	389	length=600 numreads=6
Unigene632_Taxus
Unigene633_Taxus	GQ03508_E16.1	185	222	845	808	37/38		3e-10	97	67.9	clone=GQ03508_E16 cluster=GQ03508_E16 status=complete gb=BT114110	GQ03508_E16.1	185	222	845	808	37/38		5e-11	97	67.9	clone=GQ03508_E16 cluster=GQ03508_E16 status=complete gb=BT114110	contig20288	3e-09	90	61.9	length=1070 numreads=22
Unigene634_Taxus
Unigene635_Taxus	WS03219_L21.1	4076	4165	237	329	79/93		7e-10	84	69.9	clone=WS03219_L21 cluster=GQ03403_N18 status=3	GQ03403_N18.1	4076	4165	162	254	79/93		1e-10	84	69.9	clone=GQ03403_N18 cluster=GQ03403_N18 status=complete gb=BT113291	contig12915	0	99	2938	length=1593 numreads=37	FXAT9O003C4SQ4	3e-21	82	103
Unigene636_Taxus	WS00712_K07.1	1137	1176	133	94	37/40		4e-06	92	56	clone=WS00712_K07 cluster=WS00712_K07 status=3	WS00712_K07.1	1137	1176	133	94	37/40		8e-07	92	56	clone=WS00712_K07 cluster=WS00712_K07 status=3	contig31001	1e-63	97	244	length=297 numreads=3	FXAT9O003C1OCR	0	98	749
Unigene637_Taxus
Unigene638_Taxus	WS0079_O16.1	167	246	533	454	73/80		3e-21	91	103	clone=WS0079_O16 cluster=GQ02808_D15 status=3	GQ02808_D15.1	172	246	135	209	68/75		5e-19	90	93.7	clone=GQ02808_D15 cluster=GQ02808_D15 status=complete gb=BT104246	contig06297	3e-26	93	117	length=526 numreads=3
Unigene639_Taxus																												FXAT9O003C1477	9e-36	92	147
Unigene640_Taxus
Unigene641_Taxus
Unigene642_Taxus																							contig05106	0	98	1150	length=740 numreads=75
Unigene643_Taxus																							contig30225	3e-28	98	125	length=413 numreads=5
Unigene644_Taxus	GQ03214_I08.1	1441	1728	813	1100	255/288		2e-82	88	309	clone=GQ03214_I08 cluster=GQ03214_I08 status=complete gb=BT109975	GQ03214_I08.1	1441	1728	813	1100	255/288		4e-83	88	309	clone=GQ03214_I08 cluster=GQ03214_I08 status=complete gb=BT109975	contig10544	0	98	1796	length=1345 numreads=33
Unigene645_Taxus
Unigene646_Taxus																							contig02718	1e-61	100	234	length=342 numreads=6
Unigene647_Taxus																							contig04069	1e-152	97	535	length=440 numreads=12	contig04891	7e-19	100	91.7	length=402 numreads=3
Unigene648_Taxus
Unigene649_Taxus	GQ0174_K21.1	439	786	920	570	297/351		1e-68	84	264	clone=GQ0174_K21 cluster=GQ03321_C20 status=complete	GQ03321_C20.1	235	358	306	183	111/124		5e-33	89	143	clone=GQ03321_C20 cluster=GQ03321_C20 status=complete gb=BT112805						FXAT9O003DA25E	0	97	882
Unigene650_Taxus	GQ03706_E10.1	13	88	945	1020	67/76		3e-14	88	79.8	clone=GQ03706_E10 cluster=GQ03706_E10 status=complete gb=BT115793	GQ03706_E10.1	13	88	945	1020	67/76		6e-15	88	79.8	clone=GQ03706_E10 cluster=GQ03706_E10 status=complete gb=BT115793	contig13218	9e-51	100	198	length=1902 numreads=68
Unigene651_Taxus																												FXAT9O003DH42F	3e-71	100	266
Unigene652_Taxus																							contig15565	0	97	809	length=2055 numreads=37
Unigene653_Taxus	GQ03715_G07.1	296	1638	1348	4	1171/1346	5' read(R)	0	86	1269	clone=GQ03715_G07 cluster=GQ03715_G07 status=complete gb=BT116287	GQ03715_G07.1	296	1638	1348	4	1171/1346	5' read(R)	0	86	1269	clone=GQ03715_G07 cluster=GQ03715_G07 status=complete gb=BT116287	contig22489	0	99	2226	length=1210 numreads=34	contig04832	0	98	856	length=471 numreads=3
Unigene654_Taxus	GQ03219_H18.1	94	194	311	211	91/101		9e-27	90	121	clone=GQ03219_H18 cluster=GQ03219_H18 status=complete gb=BT110298	GQ03219_H18.1	94	194	311	211	91/101		2e-27	90	121	clone=GQ03219_H18 cluster=GQ03219_H18 status=complete gb=BT110298	contig12288	4e-71	98	266	length=237 numreads=18	FXAT9O003C0YVP	4e-10	93	61.9
Unigene655_Taxus	GQ04110_H04.1	1921	2547	431	1057	529/627		1e-129	84	466	clone=GQ04110_H04 cluster=GQ04110_H04 status=complete gb=BT119812	GQ04110_H04.1	1921	2547	431	1057	529/627		1e-130	84	466	clone=GQ04110_H04 cluster=GQ04110_H04 status=complete gb=BT119812	contig21320	0	99	2613	length=1481 numreads=15	FXAT9O003DA9KH	0	98	870
Unigene656_Taxus																							contig31803	3e-38	97	157	length=270 numreads=2
Unigene657_Taxus	GQ03419_K19.1	533	686	300	453	131/154		1e-26	85	123	clone=GQ03419_K19 cluster=GQ02830_J18 status=complete	GQ02830_J18.1	533	686	414	567	131/154		2e-27	85	123	clone=GQ02830_J18 cluster=GQ02830_J18 status=complete gb=BT105967	contig05118	0	99	924	length=1231 numreads=18
Unigene658_Taxus
Unigene659_Taxus
Unigene660_Taxus
Unigene661_Taxus	WS0054_F08.1	74	255	395	214	169/182		7e-68	92	258	clone=WS0054_F08 cluster=GQ03414_A12 status=3	GQ03414_A12.1	74	255	477	296	169/182		1e-68	92	258	clone=GQ03414_A12 cluster=GQ03414_A12 status=complete gb=BT113578	contig07098	1e-101	100	365	length=1039 numreads=45	contig02961	3e-82	95	301	length=529 numreads=4
Unigene662_Taxus
Unigene663_Taxus																							contig18657	5e-81	100	299	length=708 numreads=11	FXAT9O003CY46W	3e-09	100	60
Unigene664_Taxus
Unigene665_Taxus																												contig07155	7e-44	97	174	length=292 numreads=2
Unigene666_Taxus
Unigene667_Taxus	GQ03219_D03.1	268	582	429	115	275/315		4e-82	87	307	clone=GQ03219_D03 cluster=GQ03215_B05 status=complete	GQ03215_B05.4	268	582	1331	1017	272/315		1e-75	86	283	clone=GQ03215_B05 cluster=GQ03215_B05 status=complete gb=BT110028	contig15434	0	98	1344	length=1162 numreads=37
Unigene668_Taxus																							contig24516	1e-107	99	385	length=604 numreads=9	FXAT9O003C6IPY	1e-107	99	385
Unigene669_Taxus																							contig10055	1e-46	98	184	length=1588 numreads=25
Unigene670_Taxus
Unigene671_Taxus																							contig26585	1e-138	98	490	length=452 numreads=4	contig04850	2e-89	98	327	length=477 numreads=2
Unigene672_Taxus																							contig27838	1e-109	98	392	length=868 numreads=10
Unigene673_Taxus																							contig19728	0	99	1273	length=1114 numreads=15	FXAT9O003DMDX8	0	99	876
Unigene674_Taxus																							contig00971	1e-47	89	188	length=300 numreads=16	FXAT9O003DDLJ6	2e-84	95	309
Unigene675_Taxus	GQ03315_I18.1	371	1424	1267	214	904/1054		0	85	900	clone=GQ03315_I18 cluster=GQ03206_N15 status=complete	GQ03206_N15.1	371	1424	1240	187	904/1054		0	85	900	clone=GQ03206_N15 cluster=GQ03206_N15 status=complete gb=BT109297	contig03733	0	99	1816	length=1642 numreads=12	contig01902	1e-163	98	573	length=305 numreads=2
Unigene676_Taxus	GQ03805_F14.1	209	373	225	389	147/165		3e-45	89	184	clone=GQ03805_F14 cluster=GQ0046_P04 status=5	GQ0046_P04.1	227	373	311	457	129/147		3e-35	87	149	clone=GQ0046_P04 cluster=GQ0046_P04 status=complete gb=BT100842	contig12718	0	98	1413	length=823 numreads=82	FXAT9O003C6Z7S	1e-175	97	611
Unigene677_Taxus	GQ03217_M13.1	174	218	444	488	43/45		2e-12	95	73.8	clone=GQ03217_M13 cluster=GQ03810_A21 status=complete	GQ03810_A21.1	180	218	1533	1571	38/39		7e-12	97	69.9	clone=GQ03810_A21 cluster=GQ03810_A21 status=complete gb=BT116950						contig04584	2e-55	100	212	length=1750 numreads=12
Unigene678_Taxus
Unigene679_Taxus
Unigene680_Taxus	GQ03009_E17.1	244	933	1150	464	602/690		0	87	666	clone=GQ03009_E17 cluster=GQ03212_N15 status=complete	GQ03212_N15.1	244	933	1245	559	601/690		0	87	658	clone=GQ03212_N15 cluster=GQ03212_N15 status=complete gb=BT109832	contig14923	0	99	2377	length=1250 numreads=68	contig06235	0	99	862	length=447 numreads=3
Unigene681_Taxus	GQ03807_H04.1	110	218	761	869	92/109		2e-14	84	81.8	clone=GQ03807_H04 cluster=GQ04010_I15 status=5	GQ04010_I15.1	110	218	1435	1543	91/109		1e-12	83	73.8	clone=GQ04010_I15 cluster=GQ04010_I15 status=complete gb=BT118812	contig03096	6e-60	100	230	length=1613 numreads=33	contig04429	6e-27	92	119	length=465 numreads=3
Unigene682_Taxus																							contig28760	0	99	1667	length=861 numreads=10
Unigene683_Taxus
Unigene684_Taxus	WS0313_G05.1	71	161	529	619	78/91		3e-13	85	77.8	clone=WS0313_G05 cluster=GQ02902_C01 status=3	GQ02902_C01.1	71	161	403	493	78/91		6e-14	85	77.8	clone=GQ02902_C01 cluster=GQ02902_C01 status=complete gb=BT106055	contig18927	1e-169	97	595	length=466 numreads=7	FXAT9O003CU2AD	1e-164	99	575
Unigene685_Taxus	GQ02811_B03.1	96	531	552	117	372/436		1e-96	85	357	clone=GQ02811_B03 cluster=GQ02811_B03 status=complete gb=BT104495	GQ02811_B03.1	96	531	552	117	372/436		2e-97	85	357	clone=GQ02811_B03 cluster=GQ02811_B03 status=complete gb=BT104495	contig08978	0	98	1364	length=744 numreads=8	contig03640	0	98	712	length=383 numreads=2
Unigene686_Taxus
Unigene687_Taxus
Unigene688_Taxus
Unigene689_Taxus	GQ01302_C03.1	1	640	3	642	558/640	5' read(F)	1e-176	87	618	clone=GQ01302_C03 cluster=GQ02016_M01 status=5	GQ02016_M01.1	1	640	572	1212	558/641		1e-172	87	605	clone=GQ02016_M01 cluster=GQ02016_M01 status=complete gb=BT102808	contig34020	0	97	1853	length=1380 numreads=50	contig02495	2e-77	93	287	length=369 numreads=4
Unigene690_Taxus																							contig20709	1e-19	96	95.6	length=969 numreads=61	contig02994	5e-20	96	95.6	length=935 numreads=12
Unigene691_Taxus																												contig00165	1e-149	96	525	length=673 numreads=4
Unigene692_Taxus																							contig05391	4e-08	89	58	length=1367 numreads=33
Unigene693_Taxus																							contig36559	1e-21	95	101	length=217 numreads=13	contig00743	1e-19	93	93.7	length=1377 numreads=21
Unigene694_Taxus																							contig19025	1e-131	99	466	length=1229 numreads=13	FXAT9O003DPN0L	5e-54	99	208
Unigene695_Taxus
Unigene696_Taxus	GQ03802_L06.1	6	63	886	943	53/58		8e-13	91	75.8	clone=GQ03802_L06 cluster=GQ03802_L06 status=complete gb=BT116591	GQ03802_L06.1	6	63	886	943	53/58		2e-13	91	75.8	clone=GQ03802_L06 cluster=GQ03802_L06 status=complete gb=BT116591
Unigene697_Taxus	WS00827_J24.1	4	81	79	2	65/78	5' read(R)	7e-06	83	52	clone=WS00827_J24 cluster=WS00752_F23 status=complete	WS00752_F23.1	4	81	315	238	65/78		1e-06	83	52	clone=WS00752_F23 cluster=WS00752_F23 status=complete						FXAT9O003C8TM6	4e-41	96	165
Unigene698_Taxus
Unigene699_Taxus
Unigene700_Taxus	WS00814_P15.1	164	200	503	539	35/37		1e-07	94	58	clone=WS00814_P15 cluster=GQ03304_A21 status=3	WS00753_O15.1	164	197	642	609	32/34		1e-06	94	52	clone=WS00753_O15 cluster=WS00753_O15 status=complete	contig22362	4e-34	90	143	length=1179 numreads=69	FXAT9O003C05WB	4e-59	98	224
Unigene701_Taxus
Unigene702_Taxus																							contig34603	4e-10	100	63.9	length=567 numreads=33	contig01374	6e-19	100	91.7	length=3232 numreads=61
Unigene703_Taxus												GQ01310_O05.1	31	63	224	193	32/33		9e-06	96	50.1	clone=GQ01310_O05 cluster=GQ01310_O05 status=complete gb=BT101690	contig21976	1e-127	98	454	length=649 numreads=7
Unigene704_Taxus																												contig03533	1e-154	98	541	length=496 numreads=3
Unigene705_Taxus																							contig10686	2e-61	97	234	length=760 numreads=9
Unigene706_Taxus																							contig20934	1e-46	100	184	length=763 numreads=11
Unigene707_Taxus
Unigene708_Taxus	GQ03214_C13.1	10	96	994	908	75/87		1e-13	86	77.8	clone=GQ03214_C13 cluster=GQ03214_C13 status=complete gb=BT109950	GQ03214_C13.1	10	96	994	908	75/87		3e-14	86	77.8	clone=GQ03214_C13 cluster=GQ03214_C13 status=complete gb=BT109950	contig06773	3e-63	98	240	length=1109 numreads=94
Unigene709_Taxus
Unigene710_Taxus	WS02618_A19.1	162	647	544	59	409/486		5e-96	84	353	clone=WS02618_A19 cluster=GQ03211_P09 status=complete	GQ03211_P09.1	239	647	567	159	347/409		1e-86	84	319	clone=GQ03211_P09 cluster=GQ03211_P09 status=complete gb=BT109742	contig01134	0	99	1283	length=688 numreads=53	FXAT9O003DNK6I	0	98	654
Unigene711_Taxus	GQ02801_G23.1	639	1456	124	941	701/818		0	85	694	clone=GQ02801_G23 cluster=GQ02823_E21 status=complete	GQ02823_E21.1	892	1456	575	1139	491/565		1e-150	86	533	clone=GQ02823_E21 cluster=GQ02823_E21 status=complete gb=BT105490	contig10757	0	97	2524	length=1415 numreads=37	FXAT9O003C439A	0	97	698
Unigene712_Taxus	GQ04113_O24.1	714	906	393	585	165/193		1e-37	85	161	clone=GQ04113_O24 cluster=GQ02906_E23 status=5	GQ02906_E23.2	714	906	1123	1315	165/193		2e-38	85	161	clone=GQ02906_E23 cluster=GQ02906_E23 status=complete gb=BT106271	contig15928	0	99	1596	length=839 numreads=14	FXAT9O003DIQKA	0	98	892
Unigene713_Taxus	GQ03806_A13.1	441	732	572	284	243/292		2e-45	83	186	clone=GQ03806_A13 cluster=GQ03806_A13 status=complete gb=BT116754	GQ03806_A13.1	441	732	572	284	243/292		3e-46	83	186	clone=GQ03806_A13 cluster=GQ03806_A13 status=complete gb=BT116754	contig02816	0	99	1877	length=1097 numreads=33
Unigene714_Taxus																							contig14602	0	99	1431	length=734 numreads=12	FXAT9O003C0UMT	5e-06	100	52
Unigene715_Taxus	GQ0044_A04.1	185	1111	1277	351	798/927		0	86	815	clone=GQ0044_A04 cluster=GQ03103_N03 status=complete	GQ03103_N03.1	185	1111	1240	314	795/927		0	85	791	clone=GQ03103_N03 cluster=GQ03103_N03 status=complete gb=BT107176	contig34738	0	99	2123	length=1099 numreads=65	FXAT9O003DFDXE	0	97	735
Unigene716_Taxus																							contig24212	0	97	775	length=782 numreads=11
Unigene717_Taxus	GQ03201_O13.1	759	841	616	698	77/83		6e-25	92	117	clone=GQ03201_O13 cluster=GQ03201_O13 status=complete gb=BT108861	GQ03201_O13.1	759	841	616	698	77/83		1e-25	92	117	clone=GQ03201_O13 cluster=GQ03201_O13 status=complete gb=BT108861	contig13019	2e-11	100	69.9	length=570 numreads=4
Unigene718_Taxus
Unigene719_Taxus	WS03228_N06.1	551	904	354	1	309/355	5' read(R)	8e-87	87	323	clone=WS03228_N06 cluster=GQ0253_G06 status=3	GQ0253_G06.1	551	583	41	9	32/33	5' read(R)	1e-07	96	58	clone=GQ0253_G06 cluster=GQ0253_G06 status=complete gb=BT103449	contig17422	0	98	2575	length=1382 numreads=79	FXAT9O003DDT41	0	99	702
Unigene720_Taxus																							contig02010	1e-40	86	165	length=366 numreads=11
Unigene721_Taxus	WS0071_E22.1	133	221	408	320	77/89		8e-15	86	81.8	clone=WS0071_E22 cluster=GQ03205_J04 status=3	GQ03205_J04.1	170	221	1051	1000	49/52		6e-15	94	79.8	clone=GQ03205_J04 cluster=GQ03205_J04 status=complete gb=BT109181	contig11225	3e-47	98	186	length=1024 numreads=11
Unigene722_Taxus																							contig07131	0	89	866	length=928 numreads=28	contig00427	0	98	955	length=520 numreads=9
Unigene723_Taxus																							contig11742	0	98	698	length=611 numreads=10
Unigene724_Taxus
Unigene725_Taxus	GQ03902_E15.1	738	924	261	70	168/193		7e-43	87	178	clone=GQ03902_E15 cluster=GQ03902_E15 status=complete gb=BT117523	GQ03902_E15.1	738	924	261	70	168/193		1e-43	87	178	clone=GQ03902_E15 cluster=GQ03902_E15 status=complete gb=BT117523	contig20557	0	99	2353	length=1234 numreads=12	contig05349	2e-06	96	54	length=308 numreads=2
Unigene726_Taxus	WS00832_D09.1	156	239	31	114	75/84		1e-18	89	95.6	clone=WS00832_D09 cluster=GQ0203_O11 status=complete	GQ0203_O11.1	156	236	651	731	72/81		1e-17	88	89.7	clone=GQ0203_O11 cluster=GQ0203_O11 status=complete gb=BT102954	contig19907	0	98	646	length=756 numreads=8
Unigene727_Taxus
Unigene728_Taxus																							contig33262	1e-25	100	115	length=113 numreads=3
Unigene729_Taxus																							contig08783	2e-74	100	278	length=1870 numreads=44
Unigene730_Taxus	GQ02810_F18.1	508	576	367	435	61/69		5e-12	88	73.8	clone=GQ02810_F18 cluster=GQ02810_F18 status=complete gb=BT104436	GQ02810_F18.1	508	576	367	435	61/69		1e-12	88	73.8	clone=GQ02810_F18 cluster=GQ02810_F18 status=complete gb=BT104436	contig05970	4e-15	100	81.8	length=473 numreads=3
Unigene731_Taxus
Unigene732_Taxus
Unigene733_Taxus																							contig21651	1e-109	97	392	length=1532 numreads=20
Unigene734_Taxus	GQ0043_D12.1	47	100	878	931	47/54		8e-06	87	52	clone=GQ0043_D12 cluster=GQ0043_D12 status=complete gb=BT100772	GQ0043_D12.1	47	100	878	931	47/54		1e-06	87	52	clone=GQ0043_D12 cluster=GQ0043_D12 status=complete gb=BT100772	contig08269	5e-46	98	182	length=509 numreads=8
Unigene735_Taxus	GQ03716_F07.1	179	333	129	283	135/155		1e-34	87	149	clone=GQ03716_F07 cluster=GQ03606_P20 status=5	GQ03606_P20.1	179	333	320	474	135/155		2e-35	87	149	clone=GQ03606_P20 cluster=GQ03606_P20 status=complete gb=BT115003						contig03077	1e-130	99	462	length=890 numreads=6
Unigene736_Taxus
Unigene737_Taxus	GQ03204_M15.1	812	1087	680	955	248/276		2e-87	89	325	clone=GQ03204_M15 cluster=GQ03614_N17 status=complete	GQ03614_N17.1	812	1087	862	1137	247/276		1e-85	89	317	clone=GQ03614_N17 cluster=GQ03614_N17 status=complete gb=BT115357	contig14271	0	99	2847	length=1792 numreads=107	FXAT9O003CWDPA	0	98	819
Unigene738_Taxus	WS00754_G05.1	1	94	219	312	80/94		2e-12	85	75.8	clone=WS00754_G05 cluster=GQ03216_F04 status=complete	GQ03216_F04.1	1	94	1513	1606	80/94		4e-13	85	75.8	clone=GQ03216_F04 cluster=GQ03216_F04 status=complete gb=BT110099						FXAT9O003DNGGI	3e-48	99	190
Unigene739_Taxus	GQ03236_B19.1	35	100	141	206	57/66		6e-08	86	60	clone=GQ03236_B19 cluster=GQ03236_B19 status=complete gb=BT111330	GQ03236_B19.1	35	100	141	206	57/66		1e-08	86	60	clone=GQ03236_B19 cluster=GQ03236_B19 status=complete gb=BT111330	contig21226	6e-10	95	63.9	length=1161 numreads=7	FXAT9O003DNLF3	3e-15	89	79.8
Unigene740_Taxus
Unigene741_Taxus	GQ03221_A07.1	15	100	264	179	80/86		6e-27	93	123	clone=GQ03221_A07 cluster=GQ03221_A07 status=complete gb=BT110387	GQ03221_A07.1	15	100	264	179	80/86		1e-27	93	123	clone=GQ03221_A07 cluster=GQ03221_A07 status=complete gb=BT110387	contig09545	3e-98	96	357	length=975 numreads=13
Unigene742_Taxus																							contig20678	3e-54	100	210	length=1481 numreads=29
Unigene743_Taxus	GQ03309_O10.1	195	431	932	696	202/237		7e-48	85	192	clone=GQ03309_O10 cluster=GQ03204_G04 status=complete	GQ03204_G04.1	195	431	932	696	202/237		1e-48	85	192	clone=GQ03204_G04 cluster=GQ03204_G04 status=complete gb=BT109080	contig01754	0	98	932	length=1388 numreads=30	FXAT9O003DAG4F	0	98	678
Unigene744_Taxus	GQ02812_E06.2	390	2114	86	1810	1472/1725		0	85	1413	clone=GQ02812_E06 cluster=GQ02812_E06 status=complete gb=BT104591	GQ02812_E06.2	390	2114	86	1810	1472/1725		0	85	1413	clone=GQ02812_E06 cluster=GQ02812_E06 status=complete gb=BT104591	contig02355	0	99	4203	length=2368 numreads=83	contig02010	0	99	1869	length=962 numreads=12
Unigene745_Taxus																							contig22325	0	99	821	length=472 numreads=16
Unigene746_Taxus																							contig18893	3e-74	100	278	length=584 numreads=12
Unigene747_Taxus																							contig16389	0	99	2787	length=1824 numreads=34	FXAT9O003DAKWM	1e-106	93	383
Unigene748_Taxus																							contig34504	1e-56	92	218	length=314 numreads=8	FXAT9O003DDL3E	4e-08	89	56
Unigene749_Taxus																							contig17814	1e-130	98	464	length=1263 numreads=13	contig05042	4e-62	100	236	length=301 numreads=2
Unigene750_Taxus	WS00732_F23.1	172	225	3	56	48/54	5' read(F)	3e-08	88	60	clone=WS00732_F23 cluster=WS00732_F23 status=3	WS00732_F23.1	172	225	3	56	48/54	5' read(F)	6e-09	88	60	clone=WS00732_F23 cluster=WS00732_F23 status=3
Unigene751_Taxus	GQ03206_O09.2	318	526	297	505	172/209		9e-26	82	121	clone=GQ03206_O09 cluster=GQ03206_O09 status=complete gb=BT109300	GQ03206_O09.2	318	526	297	505	172/209		2e-26	82	121	clone=GQ03206_O09 cluster=GQ03206_O09 status=complete gb=BT109300	contig15010	0	98	1590	length=1128 numreads=26	contig02573	0	94	737	length=487 numreads=5
Unigene752_Taxus																							contig18553	2e-49	88	194	length=2020 numreads=38
Unigene753_Taxus																							contig22391	3e-44	98	176	length=699 numreads=7
Unigene754_Taxus																							contig24549	0	98	636	length=383 numreads=3
Unigene755_Taxus																							contig34736	4e-34	96	143	length=223 numreads=9
Unigene756_Taxus																							contig25873	1e-09	90	61.9	length=362 numreads=2
Unigene757_Taxus	GQ03203_N14.1	148	416	207	475	222/269		2e-38	82	161	clone=GQ03203_N14 cluster=GQ03203_N14 status=complete gb=BT109022	GQ03203_N14.1	148	416	207	475	222/269		4e-39	82	161	clone=GQ03203_N14 cluster=GQ03203_N14 status=complete gb=BT109022	contig21656	1e-174	100	609	length=1374 numreads=63	FXAT9O003DDHQT	5e-88	100	321
Unigene758_Taxus
Unigene759_Taxus
Unigene760_Taxus
Unigene761_Taxus																							contig07362	1e-127	97	454	length=917 numreads=88	contig03456	1e-120	98	428	length=416 numreads=7
Unigene762_Taxus																							contig17554	0	97	743	length=1356 numreads=22
Unigene763_Taxus																							contig28479	8e-08	89	58	length=440 numreads=5	contig01267	0	98	872	length=508 numreads=2
Unigene764_Taxus
Unigene765_Taxus																							contig09320	8e-75	98	280	length=400 numreads=7	contig05869	1e-102	99	371	length=454 numreads=2
Unigene766_Taxus
Unigene767_Taxus																							contig11958	6e-98	94	355	length=1239 numreads=82	contig04134	5e-96	94	347	length=1001 numreads=10
Unigene768_Taxus																							contig09548	1e-112	96	404	length=480 numreads=5	FXAT9O003DDNA8	1e-179	96	624
Unigene769_Taxus																							contig28137	8e-51	100	198	length=399 numreads=4
Unigene770_Taxus																							contig13625	1e-178	99	622	length=1354 numreads=27	FXAT9O003DE0NT	1e-163	97	571
Unigene771_Taxus
Unigene772_Taxus	GQ01812_C10.1	612	936	430	106	282/325		2e-80	86	303	clone=GQ01812_C10 cluster=GQ01812_C10 status=complete gb=BT102327	GQ01812_C10.1	612	936	430	106	282/325		4e-81	86	303	clone=GQ01812_C10 cluster=GQ01812_C10 status=complete gb=BT102327	contig09502	0	99	2658	length=1398 numreads=21	contig07347	1e-139	99	496	length=261 numreads=2
Unigene773_Taxus
Unigene774_Taxus																							contig29191	8e-17	88	85.7	length=713 numreads=4
Unigene775_Taxus
Unigene776_Taxus																							contig16693	0	99	1241	length=1631 numreads=23
Unigene777_Taxus	GQ03719_D12.1	169	218	825	776	47/50		5e-13	94	75.8	clone=GQ03719_D12 cluster=GQ03719_D12 status=53	GQ03719_D12.1	169	218	825	776	47/50		1e-13	94	75.8	clone=GQ03719_D12 cluster=GQ03719_D12 status=53
Unigene778_Taxus
Unigene779_Taxus																							contig10829	0	96	678	length=1898 numreads=31
Unigene780_Taxus																							contig14100	8e-51	100	198	length=865 numreads=11
Unigene781_Taxus																							contig00510	1e-122	98	436	length=1317 numreads=43
Unigene782_Taxus																							contig32354	5e-46	98	182	length=749 numreads=28	FXAT9O003DEUHI	6e-46	97	180
Unigene783_Taxus																							contig06713	7e-43	96	172	length=333 numreads=6	contig04858	2e-53	100	206	length=478 numreads=5
Unigene784_Taxus																							contig22355	9e-51	100	198	length=532 numreads=8
Unigene785_Taxus	GQ02821_A02.1	1	92	523	432	76/92		9e-07	82	56	clone=GQ02821_A02 cluster=GQ02905_O24 status=complete												contig33099	0	96	763	length=903 numreads=17	contig02861	2e-07	89	54	length=416 numreads=4
Unigene786_Taxus	WS00727_C21.1	341	831	1	494	408/494	5' read(F)	6e-75	82	283	clone=WS00727_C21 cluster=GQ03322_E03 status=3	GQ03322_E03.1	226	548	770	1094	268/325		2e-46	82	186	clone=GQ03322_E03 cluster=GQ03322_E03 status=complete gb=BT112883	contig15250	0	99	1388	length=1102 numreads=17
Unigene787_Taxus																												contig00055	0	98	2331	length=1767 numreads=22
Unigene788_Taxus
Unigene789_Taxus																							contig19538	3e-50	100	196	length=1929 numreads=65
Unigene790_Taxus																							contig01076	6e-34	95	143	length=971 numreads=17
Unigene791_Taxus																							contig03350	1e-145	93	511	length=493 numreads=7	contig00400	0	96	811	length=1357 numreads=51
Unigene792_Taxus	WS00111_K05.1	876	1268	95	487	335/393		1e-85	85	319	clone=WS00111_K05 cluster=GQ03719_O11 status=3	GQ03719_O11.1	876	1268	1096	1488	335/393		2e-86	85	319	clone=GQ03719_O11 cluster=GQ03719_O11 status=complete gb=BT116502	contig06054	0	99	2143	length=1504 numreads=52	contig04537	0	99	1859	length=1129 numreads=9
Unigene793_Taxus
Unigene794_Taxus	GQ04113_L11.1	9	208	60	259	181/200		2e-64	90	246	clone=GQ04113_L11 cluster=GQ04113_L11 status=complete gb=BT119987	GQ04113_L11.1	9	208	60	259	181/200		4e-65	90	246	clone=GQ04113_L11 cluster=GQ04113_L11 status=complete gb=BT119987	contig01579	4e-71	97	266	length=932 numreads=49
Unigene795_Taxus	WS00750_P15.1	291	416	181	306	107/126		1e-19	84	99.6	clone=WS00750_P15 cluster=GQ04001_N09 status=3	GQ04001_N09.3	174	222	707	755	46/49		1e-12	93	73.8	clone=GQ04001_N09 cluster=GQ04001_N09 status=complete gb=BT118058	contig25245	0	98	1279	length=840 numreads=28
Unigene796_Taxus																							contig24860	1e-119	94	428	length=723 numreads=4
Unigene797_Taxus
Unigene798_Taxus
Unigene799_Taxus	GQ03308_K19.1	1352	1980	47	672	519/629		1e-101	82	371	clone=GQ03308_K19 cluster=GQ0202_D09 status=complete	GQ0202_D09.1	1353	1980	218	842	517/628		1e-98	82	361	clone=GQ0202_D09 cluster=GQ0202_D09 status=complete gb=BT102879	contig13067	0	99	2393	length=1290 numreads=10	contig03674	0	98	1360	length=730 numreads=5
Unigene800_Taxus
Unigene801_Taxus	GQ03717_J17.1	151	271	365	485	106/121		1e-26	87	121	clone=GQ03717_J17 cluster=GQ03717_J17 status=complete gb=BT116378	GQ03717_J17.1	151	271	365	485	106/121		3e-27	87	121	clone=GQ03717_J17 cluster=GQ03717_J17 status=complete gb=BT116378	contig14477	2e-71	94	268	length=923 numreads=12	contig01224	4e-14	84	75.8	length=752 numreads=16
Unigene802_Taxus	GQ02830_N06.1	484	542	300	242	55/59		1e-15	93	85.7	clone=GQ02830_N06 cluster=GQ02830_N06 status=complete gb=BT105981	GQ02830_N06.1	484	542	300	242	55/59		2e-16	93	85.7	clone=GQ02830_N06 cluster=GQ02830_N06 status=complete gb=BT105981	contig12103	2e-56	88	218	length=929 numreads=18	FXAT9O003CW6MJ	1e-92	96	337
Unigene803_Taxus	GQ03204_J16.2	650	770	711	831	107/121		4e-28	88	129	clone=GQ03204_J16 cluster=GQ03204_J16 status=complete gb=BT109097	GQ03204_J16.2	650	770	711	831	107/121		7e-29	88	129	clone=GQ03204_J16 cluster=GQ03204_J16 status=complete gb=BT109097	contig10534	0	98	2081	length=1451 numreads=21
Unigene804_Taxus	GQ04103_A15.1	430	954	22	541	430/525		4e-76	81	287	clone=GQ04103_A15 cluster=GQ04007_B08 status=5	GQ04007_B08.1	430	954	796	1315	428/525		4e-72	81	272	clone=GQ04007_B08 cluster=GQ04007_B08 status=complete gb=BT118506	contig22649	1e-147	87	521	length=1353 numreads=39	contig01235	1e-150	87	529	length=1316 numreads=28
Unigene805_Taxus
Unigene806_Taxus																							contig27523	5e-23	100	107	length=901 numreads=6
Unigene807_Taxus	GQ04108_N11.1	1	250	188	434	219/250		4e-66	87	252	clone=GQ04108_N11 cluster=GQ02809_F01 status=5	GQ02809_F01.2	1	250	647	893	218/250		2e-64	87	244	clone=GQ02809_F01 cluster=GQ02809_F01 status=complete gb=BT104348	contig19201	1e-128	98	456	length=1128 numreads=17
Unigene808_Taxus																							contig31223	6e-12	91	69.9	length=311 numreads=2	contig00716	1e-16	93	83.8	length=856 numreads=8
Unigene809_Taxus	GQ0034_E19.1	428	784	411	55	297/357		6e-59	83	232	clone=GQ0034_E19 cluster=GQ0034_E19 status=complete gb=BT100641	GQ0034_E19.1	428	784	411	55	297/357		1e-59	83	232	clone=GQ0034_E19 cluster=GQ0034_E19 status=complete gb=BT100641	contig11854	0	99	2424	length=1392 numreads=19	FXAT9O003C8R3Z	1e-158	98	557
Unigene810_Taxus																							contig09366	5e-75	99	280	length=388 numreads=8	FXAT9O003C9W6Z	3e-40	92	163
Unigene811_Taxus												GQ02798_F10.1	29	61	789	821	31/33		9e-06	93	50.1	clone=GQ02798_F10 cluster=GQ02798_F10 status=5	contig14392	1e-173	96	605	length=1108 numreads=73
Unigene812_Taxus	GQ03223_O08.1	674	847	178	8	145/174	5' read(R)	1e-22	83	111	clone=GQ03223_O08 cluster=GQ03223_O08 status=complete gb=BT110583	GQ03223_O08.1	674	847	178	8	145/174	5' read(R)	2e-23	83	111	clone=GQ03223_O08 cluster=GQ03223_O08 status=complete gb=BT110583	contig01822	1e-06	83	56	length=1388 numreads=42	contig02549	0	98	3499	length=1848 numreads=20
Unigene813_Taxus	GQ02904_O01.3	446	852	573	972	343/407		6e-78	84	293	clone=GQ02904_O01 cluster=GQ02904_O01 status=complete gb=BT106200	GQ02904_O01.3	446	852	573	972	343/407		1e-78	84	293	clone=GQ02904_O01 cluster=GQ02904_O01 status=complete gb=BT106200	contig31036	1e-113	96	406	length=345 numreads=5	FXAT9O003DDL6F	0	97	672
Unigene814_Taxus	GQ04104_L17.1	742	1001	504	763	223/260		2e-56	85	222	clone=GQ04104_L17 cluster=GQ03105_N19 status=5	GQ03105_N19.4	745	1001	591	847	220/257		2e-55	85	216	clone=GQ03105_N19 cluster=GQ03105_N19 status=complete gb=BT107331	contig34683	0	98	1400	length=758 numreads=22	FXAT9O003C63X1	9e-95	93	345
Unigene815_Taxus
Unigene816_Taxus
Unigene817_Taxus	GQ0205_N12.1	147	226	607	686	71/80		1e-16	88	87.7	clone=GQ0205_N12 cluster=GQ03703_K16 status=53	WS03221_P08.1	146	226	348	429	70/82		6e-09	85	60	clone=WS03221_P08 cluster=WS03221_P08 status=3	contig18127	1e-06	83	52	length=1969 numreads=68
Unigene818_Taxus	GQ0183_D11.2	363	417	619	565	50/55		8e-11	90	69.9	clone=GQ0183_D11 cluster=GQ0183_D11 status=complete gb=BT102368	GQ0183_D11.2	363	417	619	565	50/55		2e-11	90	69.9	clone=GQ0183_D11 cluster=GQ0183_D11 status=complete gb=BT102368	contig05302	1e-103	100	373	length=1083 numreads=22
Unigene819_Taxus																							contig03862	0	95	712	length=604 numreads=12	FXAT9O003C55CQ	0	95	644
Unigene820_Taxus	GQ03311_F11.4	163	1158	209	1204	831/996		0	83	666	clone=GQ03311_F11 cluster=GQ03311_F11 status=complete gb=BT112173	GQ03311_F11.4	163	1158	209	1204	831/996		0	83	666	clone=GQ03311_F11 cluster=GQ03311_F11 status=complete gb=BT112173	contig18211	0	99	2803	length=1756 numreads=52
Unigene821_Taxus												GQ02809_D04.1	575	644	525	594	59/70		7e-06	84	52	clone=GQ02809_D04 cluster=GQ02809_D04 status=complete gb=BT104340	contig04013	0	98	1604	length=970 numreads=58	contig00847	0	99	918	length=779 numreads=6
Unigene822_Taxus																							contig24658	2e-48	100	190	length=870 numreads=29	FXAT9O003DFOJL	2e-49	99	192
Unigene823_Taxus
Unigene824_Taxus	WS00820_E16.1	369	400	198	229	32/32		2e-08	100	63.9	clone=WS00820_E16 cluster=GQ03605_K06 status=3	GQ03609_A12.1	373	399	29	3	27/27	5' read(R)	3e-06	100	54	clone=GQ03609_A12 cluster=GQ03609_A12 status=complete gb=BT115090	contig30365	1e-146	98	517	length=273 numreads=3	contig02427	2e-08	100	60	length=1306 numreads=26
Unigene825_Taxus	GQ0042_G24.1	1	220	744	522	194/223		5e-53	86	208	clone=GQ0042_G24 cluster=GQ0042_G24 status=5	GQ0042_G24.1	1	220	744	522	194/223		1e-53	86	208	clone=GQ0042_G24 cluster=GQ0042_G24 status=5	contig04217	1e-117	98	420	length=1808 numreads=60
Unigene826_Taxus	GQ03515_P19.1	142	380	685	915	197/239		3e-34	82	147	clone=GQ03515_P19 cluster=GQ03515_P19 status=complete gb=BT114511	GQ03515_P19.1	142	380	685	915	197/239		5e-35	82	147	clone=GQ03515_P19 cluster=GQ03515_P19 status=complete gb=BT114511						FXAT9O003DJ4WD	1e-119	96	426
Unigene827_Taxus	WS0016_F21.1	233	362	541	412	114/132		3e-19	86	97.6	clone=WS0016_F21 cluster=GQ03406_K05 status=3	GQ03406_K05.1	233	362	1100	971	112/132		3e-15	84	81.8	clone=GQ03406_K05 cluster=GQ03406_K05 status=complete gb=BT113385	contig02169	1e-111	99	400	length=1061 numreads=94	contig04828	3e-74	99	276	length=880 numreads=8
Unigene828_Taxus	GQ0168_D19.1	499	838	515	854	291/340		3e-75	85	285	clone=GQ0168_D19 cluster=GQ03211_H23 status=53	GQ03211_H23.1	1159	1719	2	567	460/567	5' read(F)	3e-71	81	270	clone=GQ03211_H23 cluster=GQ03211_H23 status=complete gb=BT109690	contig08738	0	98	3713	length=1956 numreads=37	FXAT9O003C4RCX	0	98	904
Unigene829_Taxus																							contig07258	3e-13	89	73.8	length=1260 numreads=39
Unigene830_Taxus																							contig13763	1e-137	98	486	length=1299 numreads=19	FXAT9O003DO2P0	6e-49	99	192
Unigene831_Taxus																							contig07073	1e-34	98	145	length=382 numreads=2
Unigene832_Taxus
Unigene833_Taxus																							contig19171	0	99	650	length=636 numreads=5
Unigene834_Taxus																							contig35250	9e-32	86	135	length=409 numreads=11	FXAT9O003DFOG3	3e-54	88	208
Unigene835_Taxus	WS0266_G19.1	247	406	74	233	135/160		2e-25	84	119	clone=WS0266_G19 cluster=GQ03406_K05 status=complete	GQ03406_K05.1	247	406	118	277	135/160		4e-26	84	119	clone=GQ03406_K05 cluster=GQ03406_K05 status=complete gb=BT113385	contig05893	0	99	1647	length=1272 numreads=47	contig04828	1e-26	82	119	length=880 numreads=8
Unigene836_Taxus
Unigene837_Taxus												WS00811_F03.1	29	57	354	326	28/29		5e-06	96	50.1	clone=WS00811_F03 cluster=WS00811_F03 status=complete
Unigene838_Taxus	GQ03810_P13.1	239	282	285	328	40/44		6e-07	90	56	clone=GQ03810_P13 cluster=GQ03810_P13 status=complete gb=BT117000	GQ03810_P13.1	239	282	285	328	40/44		1e-07	90	56	clone=GQ03810_P13 cluster=GQ03810_P13 status=complete gb=BT117000	contig07783	5e-65	91	246	length=2048 numreads=60	contig00472	1e-57	88	220	length=1838 numreads=29
Unigene839_Taxus																							contig19785	6e-18	94	89.7	length=478 numreads=12
Unigene840_Taxus
Unigene841_Taxus																							contig01172	0	99	733	length=947 numreads=68	contig00045	1e-177	99	617	length=851 numreads=17
Unigene842_Taxus																							contig24132	0	99	708	length=373 numreads=2
Unigene843_Taxus																							contig00143	0	97	1179	length=964 numreads=10
Unigene844_Taxus																							contig18897	3e-83	97	307	length=176 numreads=5	contig04459	1e-107	99	387	length=556 numreads=4
Unigene845_Taxus	GQ03405_D09.1	134	213	113	192	69/80		6e-11	86	71.9	clone=GQ03405_D09 cluster=GQ03405_D09 status=complete gb=BT113331	GQ03405_D09.1	134	213	113	192	69/80		1e-11	86	71.9	clone=GQ03405_D09 cluster=GQ03405_D09 status=complete gb=BT113331	contig04072	1e-170	86	599	length=1344 numreads=102	FXAT9O003CX9D2	1e-136	98	484
Unigene846_Taxus	GQ03102_D03.1	479	1038	126	685	460/560		4e-85	82	317	clone=GQ03102_D03 cluster=GQ03708_N18 status=complete	GQ03708_N18.1	479	853	473	847	306/375		2e-49	81	196	clone=GQ03708_N18 cluster=GQ03708_N18 status=complete gb=BT115919	contig00395	0	99	1271	length=1278 numreads=127	FXAT9O003DE1SR	0	98	767
Unigene847_Taxus
Unigene848_Taxus																							contig33320	4e-52	91	204	length=253 numreads=43	contig04899	1e-145	98	511	length=408 numreads=3
Unigene849_Taxus	GQ0182_E05.1	191	231	372	332	38/41		2e-07	92	58	clone=GQ0182_E05 cluster=GQ0182_E05 status=5	GQ0182_E05.1	191	231	372	332	38/41		4e-08	92	58	clone=GQ0182_E05 cluster=GQ0182_E05 status=5						FXAT9O003DJDO1	1e-08	89	58
Unigene850_Taxus												WS00733_B18.1	190	247	178	235	50/58		5e-06	86	52	clone=WS00733_B18 cluster=WS00733_B18 status=3	contig16313	1e-165	92	579	length=688 numreads=26	contig03213	5e-16	80	83.8	length=395 numreads=2
Unigene851_Taxus	GQ04004_E23.1	4	297	294	1	241/294	5' read(R)	2e-38	81	163	clone=GQ04004_E23 cluster=GQ04004_E23 status=complete gb=BT118260	GQ04004_E23.1	4	297	294	1	241/294	5' read(R)	4e-39	81	163	clone=GQ04004_E23 cluster=GQ04004_E23 status=complete gb=BT118260	contig16524	0	98	1070	length=1644 numreads=31
Unigene852_Taxus	GQ02820_L20.1	342	829	257	744	423/488		1e-125	86	452	clone=GQ02820_L20 cluster=GQ03310_P15 status=53	GQ03310_P15.2	343	829	337	823	422/487		1e-125	86	450	clone=GQ03310_P15 cluster=GQ03310_P15 status=complete gb=BT112159	contig08943	0	99	1744	length=1530 numreads=69	contig04068	0	99	1065	length=553 numreads=9
Unigene853_Taxus																							contig27279	6e-09	100	60	length=425 numreads=2
Unigene854_Taxus
Unigene855_Taxus
Unigene856_Taxus																							contig16935	1e-72	84	272	length=752 numreads=14	FXAT9O003DPL1Z	1e-27	85	121
Unigene857_Taxus
Unigene858_Taxus																							contig04485	2e-48	97	190	length=831 numreads=73
Unigene859_Taxus	GQ03715_L21.1	188	229	567	526	39/42		3e-08	92	60	clone=GQ03715_L21 cluster=GQ03607_L08 status=5	GQ03607_L08.4	188	229	601	560	39/42		6e-09	92	60	clone=GQ03607_L08 cluster=GQ03607_L08 status=complete gb=BT115035	contig10469	2e-17	93	87.7	length=1357 numreads=46	FXAT9O003C5VRO	1e-10	90	63.9
Unigene860_Taxus
Unigene861_Taxus
Unigene862_Taxus																							contig01432	3e-31	91	133	length=893 numreads=10
Unigene863_Taxus																							contig20521	2e-92	98	337	length=374 numreads=3
Unigene864_Taxus	GQ02821_A23.2	14	101	1095	1182	76/88		9e-14	86	79.8	clone=GQ02821_A23 cluster=GQ02821_A23 status=5	GQ02821_A23.2	14	101	1095	1182	76/88		2e-14	86	79.8	clone=GQ02821_A23 cluster=GQ02821_A23 status=5
Unigene865_Taxus	GQ02772_F05.1	170	329	756	916	138/161	3' read(F)	1e-28	85	129	clone=GQ02772_F05 cluster=GQ02772_F05 status=5	GQ02772_F05.1	170	329	756	916	138/161	3' read(F)	3e-29	85	129	clone=GQ02772_F05 cluster=GQ02772_F05 status=5						FXAT9O003DIPLR	1e-37	97	155
Unigene866_Taxus	GQ0175_F20.1	219	264	287	242	41/46		9e-06	89	52	clone=GQ0175_F20 cluster=GQ0175_F20 status=3	GQ04013_O21.1	148	261	451	338	92/114		2e-06	80	52	clone=GQ04013_O21 cluster=GQ04013_O21 status=complete gb=BT119061	contig22669	2e-24	87	111	length=455 numreads=18	contig02578	1e-22	87	103	length=418 numreads=4
Unigene867_Taxus	GQ03711_N16.1	376	825	7	456	386/450	5' read(F)	1e-105	85	385	clone=GQ03711_N16 cluster=GQ03711_N16 status=complete gb=BT116101	GQ03711_N16.1	376	825	7	456	386/450	5' read(F)	1e-105	85	385	clone=GQ03711_N16 cluster=GQ03711_N16 status=complete gb=BT116101	contig06971	0	98	4754	length=3128 numreads=59	contig06875	0	96	640	length=381 numreads=2
Unigene868_Taxus	GQ03124_G11.1	37	88	438	387	48/52		7e-12	92	71.9	clone=GQ03124_G11 cluster=GQ03124_G11 status=complete gb=BT108617	GQ03124_G11.1	37	88	438	387	48/52		1e-12	92	71.9	clone=GQ03124_G11 cluster=GQ03124_G11 status=complete gb=BT108617
Unigene869_Taxus
Unigene870_Taxus	GQ02808_K07.2	278	852	737	163	494/575		1e-139	85	498	clone=GQ02808_K07 cluster=GQ02808_K07 status=complete gb=BT104293	GQ02808_K07.2	278	852	737	163	494/575		1e-140	85	498	clone=GQ02808_K07 cluster=GQ02808_K07 status=complete gb=BT104293	contig04385	0	99	2565	length=2052 numreads=46	contig02332	1e-177	99	618	length=328 numreads=2
Unigene871_Taxus	GQ0132_C16.1	1247	1734	905	416	431/490		1e-136	87	488	clone=GQ0132_C16 cluster=GQ03515_G14 status=53												contig17652	0	99	2918	length=1596 numreads=35	contig03425	0	98	864	length=468 numreads=2
Unigene872_Taxus																							contig16044	0	99	688	length=1464 numreads=23
Unigene873_Taxus	GQ02907_M17.1	240	507	274	7	230/268	5' read(R)	2e-58	85	230	clone=GQ02907_M17 cluster=GQ02802_B01 status=complete	GQ03201_O19.1	259	446	1076	889	161/188		9e-38	85	159	clone=GQ03201_O19 cluster=GQ03201_O19 status=complete gb=BT108863	contig27661	0	99	1449	length=747 numreads=12	contig07302	1e-144	97	511	length=282 numreads=3
Unigene874_Taxus	WS00722_K05.1	300	966	733	64	561/670		1e-128	83	460	clone=WS00722_K05 cluster=GQ04107_E23 status=3	GQ04107_E23.2	300	966	956	287	559/670		1e-124	83	444	clone=GQ04107_E23 cluster=GQ04107_E23 status=complete gb=BT119569	contig10196	0	98	1812	length=1280 numreads=44	FXAT9O003C1QCW	1e-177	97	618
Unigene875_Taxus																												FXAT9O003DKI5N	5e-25	91	111
Unigene876_Taxus
Unigene877_Taxus	GQ03223_M10.1	1	603	648	50	504/603		1e-110	83	398	clone=GQ03223_M10 cluster=GQ03223_M10 status=complete gb=BT110573	GQ03223_M10.1	1	603	648	50	504/603		1e-110	83	398	clone=GQ03223_M10 cluster=GQ03223_M10 status=complete gb=BT110573	contig18222	2e-35	93	149	length=106 numreads=2
Unigene878_Taxus
Unigene879_Taxus																							contig07324	8e-62	100	236	length=1646 numreads=39	contig02596	7e-60	99	228	length=700 numreads=7
Unigene880_Taxus																							contig35825	3e-10	95	63.9	length=175 numreads=10	FXAT9O003DIX80	1e-10	86	63.9
Unigene881_Taxus	WS00810_H03.1	500	610	202	92	96/111		3e-20	86	101	clone=WS00810_H03 cluster=GQ03809_G05 status=complete	GQ03809_G05.1	500	610	1662	1552	96/111		5e-21	86	101	clone=GQ03809_G05 cluster=GQ03809_G05 status=complete gb=BT116918	contig32042	1e-160	99	563	length=288 numreads=3
Unigene882_Taxus																							contig18841	0	96	848	length=511 numreads=4	FXAT9O003C8H3X	4e-17	93	87.7
Unigene883_Taxus																												FXAT9O003CVN6A	1e-06	92	52
Unigene884_Taxus																							contig15775	8e-86	96	315	length=1104 numreads=30	FXAT9O003CYISO	7e-47	92	184
Unigene885_Taxus
Unigene886_Taxus	WS00818_P10.1	1166	2036	926	56	756/871	3' read(R)	0	86	815	clone=WS00818_P10 cluster=GQ03802_N04 status=3	GQ03802_N04.1	1429	2036	22	629	537/608		0	88	642	clone=GQ03802_N04 cluster=GQ03802_N04 status=complete gb=BT116596	contig12430	7e-69	84	262	length=2338 numreads=101	FXAT9O003DAXFH	4e-65	85	248
Unigene887_Taxus
Unigene888_Taxus
Unigene889_Taxus
Unigene890_Taxus
Unigene891_Taxus																							contig01729	1e-132	98	468	length=924 numreads=18	contig05280	5e-16	83	81.8	length=723 numreads=4
Unigene892_Taxus
Unigene893_Taxus	GQ03202_L03.1	326	679	204	557	300/354		8e-72	84	274	clone=GQ03202_L03 cluster=GQ03117_L14 status=complete	GQ03117_L14.1	326	679	204	557	300/354		1e-72	84	274	clone=GQ03117_L14 cluster=GQ03117_L14 status=complete gb=BT108168	contig08755	0	99	2526	length=1323 numreads=49	contig00912	0	98	1832	length=980 numreads=5
Unigene894_Taxus
Unigene895_Taxus
Unigene896_Taxus																							contig31372	0	98	751	length=418 numreads=5
Unigene897_Taxus																												FXAT9O003DK7D5	1e-46	99	184
Unigene898_Taxus
Unigene899_Taxus																							contig04636	1e-153	90	539	length=848 numreads=18	contig01730	4e-18	81	89.7	length=1274 numreads=22
Unigene900_Taxus																							contig18523	0	99	1027	length=538 numreads=13	FXAT9O003DCSU6	0	98	825
Unigene901_Taxus	GQ03518_I02.1	10	179	235	404	140/170		1e-19	82	99.6	clone=GQ03518_I02 cluster=GQ03518_I02 status=complete gb=BT114648	GQ03518_I02.1	10	179	235	404	140/170		3e-20	82	99.6	clone=GQ03518_I02 cluster=GQ03518_I02 status=complete gb=BT114648	contig21928	0	96	1152	length=2187 numreads=28	FXAT9O003DKLAK	2e-34	90	145
Unigene902_Taxus	GQ04101_P17.1	129	359	490	720	197/231		1e-46	85	188	clone=GQ04101_P17 cluster=GQ04003_F10 status=5	GQ04003_F10.1	129	359	362	592	197/231		2e-47	85	188	clone=GQ04003_F10 cluster=GQ04003_F10 status=5	contig13410	1e-138	98	490	length=1201 numreads=21	contig03042	1e-135	98	480	length=1067 numreads=14
Unigene903_Taxus	WS0312_C10.1	1584	1945	1	362	312/362	5' read(F)	6e-86	86	321	clone=WS0312_C10 cluster=WS0312_C10 status=3	WS0312_C10.1	1584	1945	1	362	312/362	5' read(F)	1e-86	86	321	clone=WS0312_C10 cluster=WS0312_C10 status=3	contig24309	0	100	1041	length=944 numreads=8	FXAT9O003DACI5	0	99	872
Unigene904_Taxus	GQ03236_B01.1	357	1597	1432	192	1058/1241		0	85	1009	clone=GQ03236_B01 cluster=GQ03236_B01 status=complete gb=BT111327	GQ03236_B01.1	357	1597	1432	192	1058/1241		0	85	1009	clone=GQ03236_B01 cluster=GQ03236_B01 status=complete gb=BT111327	contig13436	0	99	1774	length=920 numreads=75	contig06108	0	99	1473	length=763 numreads=7
Unigene905_Taxus																							contig14498	1e-133	96	474	length=1123 numreads=7	FXAT9O003DDDLC	9e-92	95	333
Unigene906_Taxus	WS00839_J03.1	11	100	19	108	79/90		8e-18	87	91.7	clone=WS00839_J03 cluster=WS00839_J03 status=complete	WS00839_J03.1	11	100	19	108	79/90		1e-18	87	91.7	clone=WS00839_J03 cluster=WS00839_J03 status=complete
Unigene907_Taxus																							contig25722	1e-60	100	232	length=1060 numreads=10
Unigene908_Taxus																							contig21344	1e-118	93	422	length=720 numreads=18
Unigene909_Taxus	WS0328_B02.1	428	961	545	12	461/534		1e-134	86	480	clone=WS0328_B02 cluster=GQ03401_A03 status=3	GQ03401_A03.1	428	961	1118	585	460/534		1e-132	86	472	clone=GQ03401_A03 cluster=GQ03401_A03 status=complete gb=BT113191	contig10515	0	100	1162	length=1520 numreads=18	contig07250	1e-155	99	547	length=290 numreads=2
Unigene910_Taxus
Unigene911_Taxus
Unigene912_Taxus																							contig36057	5e-88	90	323	length=309 numreads=25
Unigene913_Taxus
Unigene914_Taxus																							contig16369	7e-14	95	75.8	length=330 numreads=7
Unigene915_Taxus																							contig32974	0	98	878	length=486 numreads=83
Unigene916_Taxus
Unigene917_Taxus																							contig02068	0	95	632	length=1237 numreads=9
Unigene918_Taxus	WS0321_L09.1	729	794	66	1	57/66	5' read(R)	1e-07	86	60	clone=WS0321_L09 cluster=WS0321_L09 status=3	WS0321_L09.1	729	794	66	1	57/66	5' read(R)	2e-08	86	60	clone=WS0321_L09 cluster=WS0321_L09 status=3
Unigene919_Taxus
Unigene920_Taxus																							contig21229	5e-49	99	192	length=486 numreads=7
Unigene921_Taxus	WS02616_K13.1	1	33	101	133	33/33		1e-09	100	65.9	clone=WS02616_K13 cluster=GQ03911_M19 status=complete												contig06737	0	98	1209	length=2056 numreads=57
Unigene922_Taxus	GQ03227_I17.1	10	145	461	326	123/136		7e-40	90	167	clone=GQ03227_I17 cluster=GQ03227_I17 status=complete gb=BT110762	GQ03227_I17.1	10	145	461	326	123/136		1e-40	90	167	clone=GQ03227_I17 cluster=GQ03227_I17 status=complete gb=BT110762	contig19740	0	95	1120	length=681 numreads=28	contig05956	0	92	729	length=592 numreads=6
Unigene923_Taxus	GQ04111_P08.1	118	444	1460	1134	274/327		1e-58	83	228	clone=GQ04111_P08 cluster=GQ04111_P08 status=complete gb=BT119898	GQ04111_P08.1	118	444	1460	1134	274/327		2e-59	83	228	clone=GQ04111_P08 cluster=GQ04111_P08 status=complete gb=BT119898	contig19539	0	99	678	length=1268 numreads=13
Unigene924_Taxus	WS0329_N05.1	108	327	102	321	186/220		6e-40	84	167	clone=WS0329_N05 cluster=GQ03313_E14 status=complete	GQ03313_E14.1	108	327	41	260	186/220		1e-40	84	167	clone=GQ03313_E14 cluster=GQ03313_E14 status=complete gb=BT112305	contig34681	0	97	1074	length=758 numreads=93	FXAT9O003C063Z	1e-122	96	434
Unigene925_Taxus																							contig17644	6e-58	92	222	length=1311 numreads=23
Unigene926_Taxus
Unigene927_Taxus	GQ03126_O10.1	205	318	267	154	95/114		1e-12	83	75.8	clone=GQ03126_O10 cluster=GQ03126_O10 status=complete gb=BT108776	GQ03126_O10.1	205	318	267	154	95/114		2e-13	83	75.8	clone=GQ03126_O10 cluster=GQ03126_O10 status=complete gb=BT108776	contig23573	9e-25	85	113	length=360 numreads=4	FXAT9O003DO027	7e-20	85	95.6
Unigene928_Taxus	GQ02816_O10.1	1859	2279	37	457	350/422		2e-64	82	250	clone=GQ02816_O10 cluster=GQ02816_O10 status=complete gb=BT104948	GQ02816_O10.1	1859	2279	37	457	350/422		4e-65	82	250	clone=GQ02816_O10 cluster=GQ02816_O10 status=complete gb=BT104948	contig15726	0	99	2212	length=1144 numreads=10	FXAT9O003CWRW8	0	99	878
Unigene929_Taxus	GQ02822_H10.1	175	232	95	152	51/58		1e-07	87	60	clone=GQ02822_H10 cluster=GQ02822_H10 status=complete gb=BT105436	GQ02822_H10.1	175	232	95	152	51/58		2e-08	87	60	clone=GQ02822_H10 cluster=GQ02822_H10 status=complete gb=BT105436	contig06061	0	98	1221	length=677 numreads=25
Unigene930_Taxus
Unigene931_Taxus
Unigene932_Taxus	GQ0064_J24.1	174	228	136	82	52/55		5e-16	94	85.7	clone=GQ0064_J24 cluster=GQ03108_E06 status=complete	GQ03108_E06.1	182	228	1367	1321	45/47		2e-14	95	77.8	clone=GQ03108_E06 cluster=GQ03108_E06 status=complete gb=BT120002	contig35582	3e-53	100	206	length=678 numreads=20	contig01115	2e-39	94	159	length=2292 numreads=38
Unigene933_Taxus																												FXAT9O003CZIWV	5e-59	100	224
Unigene934_Taxus	GQ0161_E24.1	165	217	117	65	49/53		3e-12	92	73.8	clone=GQ0161_E24 cluster=GQ0161_E24 status=3	GQ0161_E24.1	165	217	117	65	49/53		6e-13	92	73.8	clone=GQ0161_E24 cluster=GQ0161_E24 status=3	contig25979	1e-47	100	188	length=832 numreads=9	FXAT9O003C1RSN	1e-05	93	48.1
Unigene935_Taxus																							contig06787	1e-172	96	601	length=1029 numreads=31
Unigene936_Taxus	GQ03806_O21.1	6	101	622	717	82/96		3e-14	85	79.8	clone=GQ03806_O21 cluster=GQ03806_O21 status=complete gb=BT116794	GQ03806_O21.1	6	101	622	717	82/96		6e-15	85	79.8	clone=GQ03806_O21 cluster=GQ03806_O21 status=complete gb=BT116794						FXAT9O003C94W4	5e-59	100	224
Unigene937_Taxus																							contig27145	1e-46	98	184	length=909 numreads=6
Unigene938_Taxus																												FXAT9O003DFHUZ	1e-19	87	93.7
Unigene939_Taxus	GQ03815_P06.1	4	77	1143	1070	69/74		1e-22	93	107	clone=GQ03815_P06 cluster=GQ03815_P06 status=complete gb=BT117253	GQ03815_P06.1	4	77	1143	1070	69/74		3e-23	93	107	clone=GQ03815_P06 cluster=GQ03815_P06 status=complete gb=BT117253	contig33530	4e-25	93	113	length=342 numreads=22	FXAT9O003DJGCV	5e-16	90	81.8
Unigene940_Taxus	WS00813_F24.1	479	642	13	176	139/164		8e-28	84	127	clone=WS00813_F24 cluster=WS00813_F24 status=3	WS00813_F24.1	479	642	13	176	139/164		1e-28	84	127	clone=WS00813_F24 cluster=WS00813_F24 status=3	contig22668	0	99	1388	length=1193 numreads=20	FXAT9O003DEY15	1e-164	98	575
Unigene941_Taxus	GQ03908_O14.2	154	369	636	851	177/216		6e-26	81	119	clone=GQ03908_O14 cluster=GQ0203_G23 status=complete	GQ0203_G23.1	154	369	620	835	177/216		1e-26	81	119	clone=GQ0203_G23 cluster=GQ0203_G23 status=complete gb=BT102928	contig20112	1e-174	97	609	length=714 numreads=19	FXAT9O003C0LBH	2e-13	85	73.8
Unigene942_Taxus
Unigene943_Taxus
Unigene944_Taxus																							contig05970	2e-51	99	200	length=473 numreads=3
Unigene945_Taxus
Unigene946_Taxus	GQ04007_L06.1	502	546	445	489	41/45		9e-07	91	58	clone=GQ04007_L06 cluster=GQ04007_L06 status=complete gb=BT118560	GQ04007_L06.1	502	546	445	489	41/45		2e-07	91	58	clone=GQ04007_L06 cluster=GQ04007_L06 status=complete gb=BT118560						contig00869	0	98	729	length=520 numreads=11
Unigene947_Taxus	GQ04005_E04.1	245	378	284	417	115/134		1e-24	85	115	clone=GQ04005_E04 cluster=GQ04005_E04 status=complete gb=BT118337	GQ04005_E04.1	245	378	284	417	115/134		3e-25	85	115	clone=GQ04005_E04 cluster=GQ04005_E04 status=complete gb=BT118337
Unigene948_Taxus	GQ02822_N04.2	157	677	732	1252	429/521		7e-81	82	303	clone=GQ02822_N04 cluster=GQ02822_N04 status=complete gb=BT105461	GQ02822_N04.2	157	677	732	1252	429/521		1e-81	82	303	clone=GQ02822_N04 cluster=GQ02822_N04 status=complete gb=BT105461	contig09178	0	100	1047	length=1374 numreads=37	contig07175	1e-124	99	442	length=299 numreads=2
Unigene949_Taxus																							contig19480	2e-45	98	180	length=420 numreads=4
Unigene950_Taxus																							contig14384	0	96	799	length=900 numreads=23	FXAT9O003DL9SY	4e-12	92	69.9
Unigene951_Taxus																							contig34073	2e-71	99	268	length=451 numreads=13	FXAT9O003DH2FN	7e-44	91	174
Unigene952_Taxus																												FXAT9O003DQSN2	1e-101	98	365
Unigene953_Taxus	GQ03119_K11.1	937	1660	685	1408	613/724		1e-156	84	555	clone=GQ03119_K11 cluster=GQ03119_K11 status=complete gb=BT108297	GQ03119_K11.1	937	1660	685	1408	613/724		1e-157	84	555	clone=GQ03119_K11 cluster=GQ03119_K11 status=complete gb=BT108297	contig09271	0	98	2603	length=1966 numreads=24
Unigene954_Taxus																							contig10483	1e-101	100	367	length=916 numreads=16
Unigene955_Taxus	WS02629_G02.1	415	818	502	99	356/404		1e-116	88	420	clone=WS02629_G02 cluster=GQ03301_E18 status=3	GQ03301_E18.1	415	818	851	448	355/404		1e-114	87	412	clone=GQ03301_E18 cluster=GQ03301_E18 status=complete gb=BT111612	contig30776	0	98	739	length=446 numreads=4
Unigene956_Taxus	WS00839_N13.1	42	216	397	223	151/175		1e-36	86	157	clone=WS00839_N13 cluster=GQ03211_D24 status=3	GQ03211_D24.1	42	216	749	575	151/175		2e-37	86	157	clone=GQ03211_D24 cluster=GQ03211_D24 status=complete gb=BT109669	contig12725	0	98	2032	length=1066 numreads=31
Unigene957_Taxus
Unigene958_Taxus	GQ02830_B24.1	129	279	183	331	128/151		1e-20	84	101	clone=GQ02830_B24 cluster=GQ02830_B24 status=complete gb=BT105921	GQ02830_B24.1	129	279	183	331	128/151		2e-21	84	101	clone=GQ02830_B24 cluster=GQ02830_B24 status=complete gb=BT105921	contig12692	8e-98	98	355	length=1372 numreads=27
Unigene959_Taxus	GQ04005_J04.1	9	1223	378	1585	1023/1215		0	84	890	clone=GQ04005_J04 cluster=GQ04005_J04 status=complete gb=BT118362	GQ04005_J04.1	9	1223	378	1585	1023/1215		0	84	890	clone=GQ04005_J04 cluster=GQ04005_J04 status=complete gb=BT118362	contig02175	0	89	1538	length=1990 numreads=105	contig03265	1e-162	92	571	length=750 numreads=4
Unigene960_Taxus																							contig00168	2e-45	95	180	length=1010 numreads=29
Unigene961_Taxus																							contig05589	6e-70	83	264	length=823 numreads=22
Unigene962_Taxus	WS0076_H03.1	651	1019	81	449	314/369		4e-78	85	295	clone=WS0076_H03 cluster=GQ03901_E21 status=3	GQ03901_E21.1	651	980	331	2	281/330	5' read(R)	7e-70	85	266	clone=GQ03901_E21 cluster=GQ03901_E21 status=complete gb=BT117478	contig10524	0	99	2771	length=1434 numreads=32	FXAT9O003DB1XE	0	99	839
Unigene963_Taxus																							contig13979	0	97	906	length=490 numreads=3
Unigene964_Taxus																							contig09246	0	96	850	length=854 numreads=93	contig02702	0	96	858	length=675 numreads=7
Unigene965_Taxus																							contig25951	7e-96	97	349	length=437 numreads=2	FXAT9O003DAP37	1e-105	98	379
Unigene966_Taxus	GQ02810_A04.2	1	170	170	1	153/170	5' read(R)	1e-50	90	202	clone=GQ02810_A04 cluster=GQ02810_A04 status=complete gb=BT104402	GQ02810_A04.2	1	170	170	1	153/170	5' read(R)	2e-51	90	202	clone=GQ02810_A04 cluster=GQ02810_A04 status=complete gb=BT104402	contig20514	1e-180	98	628	length=1663 numreads=23	FXAT9O003DLDFC	0	98	862
Unigene967_Taxus																							contig02511	0	98	846	length=1380 numreads=19
Unigene968_Taxus	GQ03705_G05.1	325	397	256	184	67/73		3e-19	91	97.6	clone=GQ03705_G05 cluster=GQ03705_G05 status=complete gb=BT115739	GQ03705_G05.1	325	397	256	184	67/73		6e-20	91	97.6	clone=GQ03705_G05 cluster=GQ03705_G05 status=complete gb=BT115739	contig13481	1e-146	94	515	length=1460 numreads=28
Unigene969_Taxus	GQ03238_O02.1	485	1200	739	24	598/716		1e-135	83	484	clone=GQ03238_O02 cluster=GQ03209_A06 status=5	GQ03209_A06.4	485	1200	1685	970	597/716		1e-133	83	476	clone=GQ03209_A06 cluster=GQ03209_A06 status=complete gb=BT109484	contig09514	0	98	2958	length=1745 numreads=39	FXAT9O003C61V7	0	98	912
Unigene970_Taxus																							contig04167	2e-93	93	341	length=307 numreads=3
Unigene971_Taxus	WS0085_E17.1	413	520	144	37	93/108		1e-18	86	95.6	clone=WS0085_E17 cluster=GQ0044_N22 status=complete	GQ03110_D01.1	413	511	347	249	83/99		1e-11	83	69.9	clone=GQ03110_D01 cluster=GQ03110_D01 status=complete gb=BT107610	contig35554	0	99	712	length=364 numreads=10
Unigene972_Taxus																							contig19330	2e-33	100	141	length=686 numreads=5
Unigene973_Taxus																							contig08995	1e-47	96	188	length=812 numreads=7	contig03622	9e-50	95	194	length=446 numreads=2
Unigene974_Taxus																							contig21933	3e-50	99	196	length=532 numreads=4	contig02954	1e-50	99	196	length=485 numreads=2
Unigene975_Taxus												WS0266_H17.1	39	63	578	554	25/25		7e-06	100	50.1	clone=WS0266_H17 cluster=WS0266_H17 status=3	contig16297	3e-14	90	77.8	length=1339 numreads=37	contig03110	1e-07	100	54	length=963 numreads=38
Unigene976_Taxus	GQ03707_P21.1	19	85	1304	1370	59/67		6e-11	88	69.9	clone=GQ03707_P21 cluster=GQ03707_P21 status=complete gb=BT115884	GQ03707_P21.1	19	85	1304	1370	59/67		1e-11	88	69.9	clone=GQ03707_P21 cluster=GQ03707_P21 status=complete gb=BT115884	contig23360	1e-108	97	389	length=600 numreads=7
Unigene977_Taxus	GQ03717_C21.1	392	1599	1995	788	1044/1209		0	86	1072	clone=GQ03717_C21 cluster=GQ03717_C21 status=complete gb=BT116359	GQ03717_C21.1	392	1599	1995	788	1044/1209		0	86	1072	clone=GQ03717_C21 cluster=GQ03717_C21 status=complete gb=BT116359	contig29189	0	98	1733	length=954 numreads=10	contig03990	0	98	1374	length=1238 numreads=9
Unigene978_Taxus
Unigene979_Taxus																							contig12210	1e-149	98	525	length=1321 numreads=13	FXAT9O003C9ZKV	1e-74	98	278
Unigene980_Taxus	GQ04113_F08.1	984	1066	188	270	71/83		3e-10	85	69.9	clone=GQ04113_F08 cluster=GQ0024_I12 status=5												contig01953	2e-13	86	77.8	length=618 numreads=5
Unigene981_Taxus
Unigene982_Taxus	GQ02803_L05.1	516	625	1	110	99/110	5' read(F)	4e-29	90	131	clone=GQ02803_L05 cluster=GQ02803_L05 status=complete gb=BT103887	GQ02803_L05.1	516	625	1	110	99/110	5' read(F)	7e-30	90	131	clone=GQ02803_L05 cluster=GQ02803_L05 status=complete gb=BT103887	contig15089	0	99	936	length=1532 numreads=53
Unigene983_Taxus																							contig03754	8e-26	93	115	length=1271 numreads=26	FXAT9O003DFLB5	2e-24	94	109
Unigene984_Taxus	GQ03608_O04.1	1062	1228	244	78	142/167		1e-29	85	133	clone=GQ03608_O04 cluster=GQ03608_O04 status=complete gb=BT115084	GQ03608_O04.1	1062	1228	244	78	142/167		3e-30	85	133	clone=GQ03608_O04 cluster=GQ03608_O04 status=complete gb=BT115084	contig06422	0	99	1061	length=799 numreads=17	contig01861	1e-137	89	486	length=1226 numreads=14
Unigene985_Taxus
Unigene986_Taxus																							contig02458	1e-66	100	254	length=153 numreads=3
Unigene987_Taxus																							contig33127	2e-51	100	200	length=958 numreads=25
Unigene988_Taxus
Unigene989_Taxus																							contig33493	5e-65	99	246	length=812 numreads=25
Unigene990_Taxus
Unigene991_Taxus
Unigene992_Taxus																							contig24312	1e-134	99	476	length=677 numreads=6
Unigene993_Taxus
Unigene994_Taxus	WS0051_H15.1	1031	1102	194	123	62/72		1e-08	86	63.9	clone=WS0051_H15 cluster=GQ03222_P17 status=3	GQ03222_P17.1	1031	1102	430	359	62/72		2e-09	86	63.9	clone=GQ03222_P17 cluster=GQ03222_P17 status=complete gb=BT110522	contig14218	0	88	975	length=1333 numreads=53	FXAT9O003C62B2	5e-60	100	230
Unigene995_Taxus																							contig16202	4e-39	93	161	length=178 numreads=2	contig00811	9e-35	85	145	length=288 numreads=5
Unigene996_Taxus																							contig24812	2e-08	96	58	length=468 numreads=9
Unigene997_Taxus
Unigene998_Taxus
Unigene999_Taxus	GQ03916_J17.1	401	503	434	536	90/103		3e-20	87	101	clone=GQ03916_J17 cluster=GQ02830_H24 status=5	GQ02830_H24.1	401	503	439	541	90/103		5e-21	87	101	clone=GQ02830_H24 cluster=GQ02830_H24 status=complete gb=BT105960	contig25577	1e-153	99	541	length=559 numreads=6	FXAT9O003C1PJS	1e-102	98	371
Unigene1000_Taxus
Unigene1001_Taxus																							contig25404	1e-76	98	285	length=464 numreads=5	FXAT9O003C5JX5	4e-52	97	202
Unigene1002_Taxus	WS0266_P10.1	160	229	55	124	60/70		9e-08	85	60	clone=WS0266_P10 cluster=WS0266_P10 status=complete	WS0266_P10.1	160	229	55	124	60/70		2e-08	85	60	clone=WS0266_P10 cluster=WS0266_P10 status=complete	contig28769	1e-127	96	454	length=648 numreads=7
Unigene1003_Taxus	WS03221_I04.1	1795	2004	1	210	183/210	5' read(F)	4e-50	87	202	clone=WS03221_I04 cluster=GQ02820_L07 status=3	GQ02820_L07.1	2022	2144	149	271	111/123		1e-34	90	149	clone=GQ02820_L07 cluster=GQ02820_L07 status=complete gb=BT105301	contig00134	0	99	2169	length=2044 numreads=37	FXAT9O003DIAYM	0	99	825
Unigene1004_Taxus	GQ03604_C10.1	13	126	37	150	104/114		2e-34	91	147	clone=GQ03604_C10 cluster=GQ02903_K07 status=complete	GQ02903_K07.2	13	126	1389	1502	104/114		3e-35	91	147	clone=GQ02903_K07 cluster=GQ02903_K07 status=complete gb=BT106135	contig19039	3e-66	100	250	length=823 numreads=7
Unigene1005_Taxus																							contig04126	1e-152	96	537	length=1521 numreads=63
Unigene1006_Taxus																							contig05574	3e-87	95	319	length=840 numreads=38	contig03133	9e-08	88	54	length=568 numreads=5
Unigene1007_Taxus																							contig17443	2e-17	92	87.7	length=254 numreads=7
Unigene1008_Taxus																							contig34894	9e-59	87	226	length=475 numreads=12	contig01238	4e-89	85	325	length=857 numreads=11
Unigene1009_Taxus																							contig14950	1e-168	99	591	length=1076 numreads=11	FXAT9O003DMIQT	5e-93	98	339
Unigene1010_Taxus	GQ03311_L20.1	1	197	308	504	170/197		3e-43	86	176	clone=GQ03311_L20 cluster=GQ03117_B21 status=complete	GQ03117_B21.1	1	197	379	575	169/197		1e-41	85	168	clone=GQ03117_B21 cluster=GQ03117_B21 status=complete gb=BT108119	contig15966	1e-108	100	391	length=1022 numreads=26
Unigene1011_Taxus	WS0268_G11.1	1	200	289	94	168/200		2e-29	84	131	clone=WS0268_G11 cluster=GQ03101_M10 status=complete	GQ04005_C01.1	1	200	1326	1131	166/200		2e-25	83	115	clone=GQ04005_C01 cluster=GQ04005_C01 status=complete gb=BT118326	contig02226	1e-93	86	341	length=1197 numreads=77	contig05389	5e-23	83	105	length=663 numreads=6
Unigene1012_Taxus	GQ03806_M07.1	427	544	898	1015	105/118		2e-29	88	131	clone=GQ03806_M07 cluster=GQ03806_M07 status=complete gb=BT116789	GQ03806_M07.1	427	544	898	1015	105/118		5e-30	88	131	clone=GQ03806_M07 cluster=GQ03806_M07 status=complete gb=BT116789	contig06428	1e-106	99	385	length=1247 numreads=25	contig02241	1e-137	98	484	length=513 numreads=3
Unigene1013_Taxus																												FXAT9O003C0QD7	2e-43	98	172
Unigene1014_Taxus																							contig36256	2e-11	89	67.9	length=680 numreads=462	FXAT9O003DAP37	2e-15	91	79.8
Unigene1015_Taxus	GQ03801_C12.1	455	536	1050	1131	74/82		1e-19	90	99.6	clone=GQ03801_C12 cluster=GQ03801_C12 status=complete gb=BT116517	GQ03801_C12.1	455	536	1050	1131	74/82		3e-20	90	99.6	clone=GQ03801_C12 cluster=GQ03801_C12 status=complete gb=BT116517	contig22140	1e-119	96	426	length=1939 numreads=23
Unigene1016_Taxus
Unigene1017_Taxus																							contig26121	1e-123	98	440	length=428 numreads=2
Unigene1018_Taxus
Unigene1019_Taxus																												FXAT9O003DP9XM	1e-81	99	299
Unigene1020_Taxus
Unigene1021_Taxus
Unigene1022_Taxus	WS0012_B24.1	973	1097	79	203	101/125		6e-07	80	58	clone=WS0012_B24 cluster=WS0012_B24 status=3	WS0012_B24.1	973	1097	79	203	101/125		1e-07	80	58	clone=WS0012_B24 cluster=WS0012_B24 status=3	contig03347	0	87	688	length=1127 numreads=33	contig07578	0	95	1033	length=822 numreads=30
Unigene1023_Taxus																												FXAT9O003DL4P5	7e-06	82	48.1
Unigene1024_Taxus																							contig34779	1e-128	99	458	length=360 numreads=4
Unigene1025_Taxus	GQ03411_G19.1	1316	1865	842	1391	455/550		1e-90	82	337	clone=GQ03411_G19 cluster=GQ03411_G19 status=complete gb=BT113502	GQ03411_G19.1	1316	1865	842	1391	455/550		2e-91	82	337	clone=GQ03411_G19 cluster=GQ03411_G19 status=complete gb=BT113502	contig14134	0	99	3289	length=1732 numreads=41	FXAT9O003CYHSL	2e-39	80	163
Unigene1026_Taxus	GQ03109_P09.1	1	436	628	193	377/436		1e-109	86	396	clone=GQ03109_P09 cluster=GQ03324_I11 status=complete	GQ03324_I11.1	1	436	731	296	374/436		1e-102	85	373	clone=GQ03324_I11 cluster=GQ03324_I11 status=complete gb=BT113014	contig10275	0	99	1039	length=799 numreads=78	contig04864	9e-42	81	168	length=934 numreads=8
Unigene1027_Taxus	GQ02822_N20.1	252	315	1	64	56/64	5' read(F)	3e-09	87	63.9	clone=GQ02822_N20 cluster=GQ02822_N20 status=complete gb=BT105464	GQ02822_N20.1	252	315	1	64	56/64	5' read(F)	5e-10	87	63.9	clone=GQ02822_N20 cluster=GQ02822_N20 status=complete gb=BT105464	contig10997	1e-62	99	238	length=882 numreads=14
Unigene1028_Taxus
Unigene1029_Taxus	GQ03211_C23.1	5	392	1077	690	328/388		3e-78	84	293	clone=GQ03211_C23 cluster=GQ03211_C23 status=complete gb=BT109660	GQ03211_C23.1	5	392	1077	690	328/388		7e-79	84	293	clone=GQ03211_C23 cluster=GQ03211_C23 status=complete gb=BT109660	contig13531	3e-22	83	105	length=1010 numreads=24	FXAT9O003C0ZAT	1e-83	100	307
Unigene1030_Taxus																							contig08811	1e-41	98	168	length=935 numreads=7
Unigene1031_Taxus																							contig12698	1e-24	100	111	length=1243 numreads=86	FXAT9O003DI3GW	5e-25	100	111
Unigene1032_Taxus
Unigene1033_Taxus	GQ04107_H02.1	1772	1966	215	21	172/195		1e-50	88	204	clone=GQ04107_H02 cluster=GQ04107_H02 status=complete gb=BT119579	GQ04107_H02.1	1772	1966	215	21	172/195		2e-51	88	204	clone=GQ04107_H02 cluster=GQ04107_H02 status=complete gb=BT119579	contig01463	0	97	1114	length=638 numreads=7	contig06069	1e-110	99	398	length=336 numreads=3
Unigene1034_Taxus												GQ03012_L13.1	2	34	89	57	31/33		9e-06	93	50.1	clone=GQ03012_L13 cluster=GQ03012_L13 status=complete gb=BT106879	contig33165	5e-10	95	63.9	length=1047 numreads=20	FXAT9O003DDCO8	1e-08	96	58
Unigene1035_Taxus	WS03222_M15.1	485	609	206	82	104/125		2e-14	83	81.8	clone=WS03222_M15 cluster=GQ03109_G04 status=complete	GQ03109_G04.1	485	609	638	514	104/125		4e-15	83	81.8	clone=GQ03109_G04 cluster=GQ03109_G04 status=complete gb=BT107566	contig21595	3e-09	93	61.9	length=446 numreads=14
Unigene1036_Taxus	GQ04108_H04.1	71	305	810	576	207/235		2e-62	88	244	clone=GQ04108_H04 cluster=GQ04108_H04 status=complete gb=BT119657	GQ04108_H04.1	71	305	810	576	207/235		4e-63	88	244	clone=GQ04108_H04 cluster=GQ04108_H04 status=complete gb=BT119657	contig21921	0	99	2244	length=1444 numreads=20	FXAT9O003CWL3Y	7e-16	83	85.7
Unigene1037_Taxus																							contig35676	0	95	686	length=573 numreads=21
Unigene1038_Taxus
Unigene1039_Taxus
Unigene1040_Taxus																							contig01492	0	97	791	length=827 numreads=44
Unigene1041_Taxus	WS00736_M17.1	869	1151	1	284	245/284	5' read(F)	2e-63	86	246	clone=WS00736_M17 cluster=GQ03229_M19 status=3	GQ03717_J16.1	706	979	1948	2221	223/274		6e-32	81	139	clone=GQ03717_J16 cluster=GQ03717_J16 status=53	contig24607	0	98	781	length=695 numreads=7	contig01738	0	98	2181	length=3389 numreads=40
Unigene1042_Taxus																							contig32819	1e-72	96	272	length=514 numreads=663
Unigene1043_Taxus																							contig31080	1e-176	98	617	length=623 numreads=7
Unigene1044_Taxus																							contig00881	1e-117	96	418	length=1439 numreads=23
Unigene1045_Taxus																							contig16293	1e-46	98	184	length=359 numreads=10
Unigene1046_Taxus																							contig05293	3e-07	100	54	length=1920 numreads=35
Unigene1047_Taxus	GQ04108_F14.1	1	98	307	210	92/98		2e-34	93	147	clone=GQ04108_F14 cluster=GQ0167_G19 status=5	GQ0167_G19.1	1	98	294	197	92/98		4e-35	93	147	clone=GQ0167_G19 cluster=GQ0167_G19 status=complete gb=BT102148	contig35068	1e-80	98	297	length=911 numreads=69	contig00492	4e-57	90	218	length=666 numreads=7
Unigene1048_Taxus																							contig11520	4e-79	94	293	length=1032 numreads=19	FXAT9O003C5RR2	1e-111	96	398
Unigene1049_Taxus	WS02631_P20.1	554	694	223	83	123/141		7e-31	87	137	clone=WS02631_P20 cluster=GQ0034_G11 status=complete	WS0078_C09.1	554	694	166	26	123/141		1e-31	87	137	clone=WS0078_C09 cluster=WS0078_C09 status=3	contig14466	0	98	1072	length=699 numreads=6	FXAT9O003C3QRA	6e-37	91	153
Unigene1050_Taxus																							contig25639	2e-51	100	200	length=984 numreads=16
Unigene1051_Taxus
Unigene1052_Taxus	WS03220_P02.1	455	577	444	322	115/123		8e-44	93	180	clone=WS03220_P02 cluster=GQ04002_F10 status=3	GQ04002_F10.1	455	577	772	650	114/123		3e-42	92	172	clone=GQ04002_F10 cluster=GQ04002_F10 status=complete gb=BT118099	contig17431	1e-118	85	426	length=585 numreads=14	contig02323	0	99	1633	length=833 numreads=11
Unigene1053_Taxus
Unigene1054_Taxus																							contig33943	1e-102	95	369	length=222 numreads=22
Unigene1055_Taxus																												FXAT9O003C9BV8	9e-93	97	337
Unigene1056_Taxus	WS0326_L04.1	5	104	439	340	90/100		4e-26	90	119	clone=WS0326_L04 cluster=GQ03806_M07 status=3	GQ03806_M07.1	5	104	1609	1510	90/100		8e-27	90	119	clone=GQ03806_M07 cluster=GQ03806_M07 status=complete gb=BT116789	contig06428	2e-64	100	244	length=1247 numreads=25	FXAT9O003CYIBZ	6e-65	100	244
Unigene1057_Taxus	GQ04110_H20.1	625	1014	710	318	348/393		1e-115	88	418	clone=GQ04110_H20 cluster=GQ02011_J07 status=complete	GQ02011_J07.1	625	1014	967	575	348/393		1e-116	88	418	clone=GQ02011_J07 cluster=GQ02011_J07 status=complete gb=BT102700	contig18139	0	98	1927	length=1495 numreads=40	FXAT9O003DM4YV	0	99	870
Unigene1058_Taxus																							contig13036	1e-16	91	85.7	length=490 numreads=3
Unigene1059_Taxus																							contig04862	3e-93	98	339	length=1486 numreads=18
Unigene1060_Taxus																							contig04291	2e-46	98	184	length=781 numreads=50
Unigene1061_Taxus																												contig02871	1e-51	100	200	length=476 numreads=5
Unigene1062_Taxus																							contig18498	2e-80	97	297	length=849 numreads=24
Unigene1063_Taxus	GQ02904_D02.1	156	375	362	143	190/220		9e-50	86	198	clone=GQ02904_D02 cluster=GQ0035_B05 status=complete	GQ0035_B05.1	156	375	730	511	190/220		2e-50	86	198	clone=GQ0035_B05 cluster=GQ0035_B05 status=complete gb=BT100647	contig06493	0	99	712	length=788 numreads=82	contig01822	1e-133	92	472	length=988 numreads=7
Unigene1064_Taxus	GQ03904_L17.1	637	939	691	993	243/303		4e-27	80	125	clone=GQ03904_L17 cluster=GQ03904_L17 status=complete gb=BT117600	GQ03904_L17.1	637	939	691	993	243/303		7e-28	80	125	clone=GQ03904_L17 cluster=GQ03904_L17 status=complete gb=BT117600	contig03396	0	93	642	length=759 numreads=36	contig00378	0	99	2428	length=1285 numreads=17
Unigene1065_Taxus																							contig35294	1e-138	98	490	length=486 numreads=29
Unigene1066_Taxus																							contig09000	3e-11	89	67.9	length=643 numreads=12	contig00716	5e-07	90	52	length=856 numreads=8
Unigene1067_Taxus	GQ0168_J08.1	7	784	416	1179	651/778		1e-150	83	533	clone=GQ0168_J08 cluster=GQ04108_I14 status=complete	GQ03230_G20.1	546	784	1	239	207/239	5' read(F)	1e-56	86	220	clone=GQ03230_G20 cluster=GQ03230_G20 status=complete gb=BT110963	contig15048	0	98	1532	length=2025 numreads=22	FXAT9O003DNKAL	1e-105	100	379
Unigene1068_Taxus
Unigene1069_Taxus	GQ03304_O18.1	120	636	20	536	434/517		1e-100	83	367	clone=GQ03304_O18 cluster=GQ03122_E18 status=53	GQ03122_E18.1	261	636	400	775	324/376		2e-90	86	333	clone=GQ03122_E18 cluster=GQ03122_E18 status=complete gb=BT108469	contig21287	0	98	1715	length=1830 numreads=34	FXAT9O003C308V	4e-80	100	297
Unigene1070_Taxus	GQ03115_D02.1	243	752	627	118	445/510		1e-138	87	496	clone=GQ03115_D02 cluster=GQ03115_D02 status=complete gb=BT107969	GQ03115_D02.1	243	752	627	118	445/510		1e-139	87	496	clone=GQ03115_D02 cluster=GQ03115_D02 status=complete gb=BT107969	contig17685	0	98	2046	length=1328 numreads=21	FXAT9O003CYIBU	1e-177	96	620
Unigene1071_Taxus	GQ03231_G23.1	420	487	1339	1272	59/68		1e-08	86	63.9	clone=GQ03231_G23 cluster=GQ03231_G23 status=complete gb=BT111023	GQ03231_G23.1	420	487	1339	1272	59/68		2e-09	86	63.9	clone=GQ03231_G23 cluster=GQ03231_G23 status=complete gb=BT111023	contig18515	0	97	1631	length=945 numreads=8	FXAT9O003CVK2X	2e-38	89	159
Unigene1072_Taxus	GQ03314_I20.1	17	101	489	573	72/85		5e-10	84	65.9	clone=GQ03314_I20 cluster=GQ03314_I20 status=complete gb=BT112401	GQ03314_I20.1	17	101	489	573	72/85		9e-11	84	65.9	clone=GQ03314_I20 cluster=GQ03314_I20 status=complete gb=BT112401
Unigene1073_Taxus	GQ03211_J17.1	247	391	1236	1092	124/145		2e-26	85	121	clone=GQ03211_J17 cluster=GQ03007_G11 status=complete	GQ03007_G11.3	248	391	2440	2297	122/144		4e-24	84	111	clone=GQ03007_G11 cluster=GQ03007_G11 status=complete gb=BT106658	contig05951	9e-99	95	359	length=444 numreads=3	FXAT9O003DG5OO	1e-103	95	373
Unigene1074_Taxus																												FXAT9O003C2WWD	9e-97	97	351
Unigene1075_Taxus
Unigene1076_Taxus	GQ02809_M16.1	129	987	1037	180	694/859		1e-105	80	387	clone=GQ02809_M16 cluster=GQ02809_M16 status=complete gb=BT104384	GQ02809_M16.1	129	987	1037	180	694/859		1e-106	80	387	clone=GQ02809_M16 cluster=GQ02809_M16 status=complete gb=BT104384	contig24620	0	98	3372	length=1889 numreads=30	FXAT9O003CWG8E	0	98	902
Unigene1077_Taxus	GQ02806_F15.1	425	1033	845	251	503/609		1e-102	82	375	clone=GQ02806_F15 cluster=GQ03807_F04 status=complete	GQ03807_F04.1	425	1033	1530	936	502/609		1e-101	82	367	clone=GQ03807_F04 cluster=GQ03807_F04 status=complete gb=BT116820	contig12884	0	97	1637	length=1970 numreads=60	FXAT9O003C6V7T	0	96	696
Unigene1078_Taxus																							contig20665	5e-49	99	192	length=992 numreads=11
Unigene1079_Taxus																							contig18655	2e-06	100	54	length=1125 numreads=92
Unigene1080_Taxus																							contig10379	1e-46	98	184	length=953 numreads=25
Unigene1081_Taxus
Unigene1082_Taxus
Unigene1083_Taxus												GQ03204_J16.2	1	65	2077	2141	55/65		6e-06	84	50.1	clone=GQ03204_J16 cluster=GQ03204_J16 status=complete gb=BT109097	contig07009	4e-28	98	123	length=1339 numreads=16
Unigene1084_Taxus																							contig09609	0	99	682	length=732 numreads=15
Unigene1085_Taxus
Unigene1086_Taxus												GQ03614_D19.1	217	254	455	418	35/38		3e-06	92	52	clone=GQ03614_D19 cluster=GQ03614_D19 status=complete gb=BT115324						FXAT9O003DLOD7	6e-39	95	159
Unigene1087_Taxus																							contig28432	2e-59	99	228	length=380 numreads=3
Unigene1088_Taxus	WS03218_G20.1	1	70	278	347	59/70		7e-06	84	52	clone=WS03218_G20 cluster=WS03218_G20 status=3	WS03218_G20.1	1	70	278	347	59/70		1e-06	84	52	clone=WS03218_G20 cluster=WS03218_G20 status=3	contig15182	2e-51	100	200	length=1209 numreads=14
Unigene1089_Taxus	GQ0011_G08.1	914	1100	438	252	157/187		1e-29	83	133	clone=GQ0011_G08 cluster=GQ0134_M06 status=complete	GQ0134_M06.1	914	1100	802	616	156/187		6e-28	83	125	clone=GQ0134_M06 cluster=GQ0134_M06 status=complete gb=BT101966	contig19302	0	98	1794	length=1787 numreads=25	FXAT9O003DLV5I	0	99	779
Unigene1090_Taxus																							contig20472	5e-15	100	79.8	length=1549 numreads=38
Unigene1091_Taxus																							contig32023	1e-136	96	486	length=295 numreads=4	FXAT9O003C9W6Z	1e-96	96	351
Unigene1092_Taxus
Unigene1093_Taxus																												FXAT9O003DBTE9	6e-06	96	48.1
Unigene1094_Taxus																							contig27542	1e-142	95	502	length=442 numreads=4	contig04515	7e-19	96	91.7	length=944 numreads=8
Unigene1095_Taxus	WS00739_M20.1	615	1180	624	59	483/566		1e-129	85	464	clone=WS00739_M20 cluster=GQ0167_H24 status=3	GQ0167_H24.1	615	1180	21	586	482/566		1e-127	85	456	clone=GQ0167_H24 cluster=GQ0167_H24 status=complete gb=BT102150	contig13072	0	99	1328	length=1433 numreads=52	FXAT9O003DMZCB	2e-08	100	60
Unigene1096_Taxus																												FXAT9O003DFZ6R	2e-09	97	60
Unigene1097_Taxus
Unigene1098_Taxus	GQ03511_P06.1	662	822	893	732	139/165		4e-18	84	95.6	clone=GQ03511_P06 cluster=GQ03511_P06 status=complete gb=BT114288	GQ03511_P06.1	662	822	893	732	139/165		7e-19	84	95.6	clone=GQ03511_P06 cluster=GQ03511_P06 status=complete gb=BT114288	contig28196	5e-47	98	188	length=392 numreads=3	contig03194	0	97	763	length=429 numreads=2
Unigene1099_Taxus	GQ03226_N09.1	313	633	560	239	271/322		7e-58	84	226	clone=GQ03226_N09 cluster=GQ02812_F03 status=complete	GQ02812_F03.1	313	633	704	382	270/323		5e-52	83	204	clone=GQ02812_F03 cluster=GQ02812_F03 status=complete gb=BT104597	contig24991	1e-132	98	470	length=654 numreads=9	contig05212	0	98	1263	length=734 numreads=10
Unigene1100_Taxus	GQ03212_B15.3	707	800	612	519	80/94		2e-12	85	75.8	clone=GQ03212_B15 cluster=GQ03212_B15 status=53	GQ03212_B15.3	707	800	612	519	80/94		3e-13	85	75.8	clone=GQ03212_B15 cluster=GQ03212_B15 status=53
Unigene1101_Taxus
Unigene1102_Taxus																							contig15488	0	97	654	length=1710 numreads=51	contig03793	0	98	829	length=494 numreads=4
Unigene1103_Taxus																							contig32977	1e-44	98	178	length=853 numreads=40	contig00026	2e-44	98	176	length=853 numreads=13
Unigene1104_Taxus																							contig17644	0	98	1774	length=1311 numreads=23
Unigene1105_Taxus																							contig11235	0	98	771	length=1140 numreads=14
Unigene1106_Taxus	GQ03408_M01.1	287	452	1503	1338	136/166		2e-17	81	91.7	clone=GQ03408_M01 cluster=GQ03408_M01 status=complete gb=BT113445	GQ03408_M01.1	287	452	1503	1338	136/166		3e-18	81	91.7	clone=GQ03408_M01 cluster=GQ03408_M01 status=complete gb=BT113445
Unigene1107_Taxus												GQ0264_B10.1	92	117	51	76	26/26		2e-06	100	52	clone=GQ0264_B10 cluster=GQ0264_B10 status=complete gb=BT103643	contig34525	1e-87	95	321	length=221 numreads=12	contig05999	1e-42	89	170	length=294 numreads=2
Unigene1108_Taxus	GQ03012_E02.1	70	99	769	798	29/30		7e-06	96	52	clone=GQ03012_E02 cluster=GQ02829_C19 status=complete	GQ02829_C19.1	70	99	1179	1208	29/30		1e-06	96	52	clone=GQ02829_C19 cluster=GQ02829_C19 status=complete gb=BT105832	contig28188	2e-51	100	200	length=1396 numreads=12
Unigene1109_Taxus	GQ04002_L08.1	295	395	230	130	93/101		3e-31	92	137	clone=GQ04002_L08 cluster=GQ04002_L08 status=complete gb=BT118124	GQ04002_L08.1	295	395	230	130	93/101		5e-32	92	137	clone=GQ04002_L08 cluster=GQ04002_L08 status=complete gb=BT118124	contig17906	3e-42	100	170	length=428 numreads=6
Unigene1110_Taxus	GQ02772_E12.1	770	907	802	665	121/138		2e-31	87	139	clone=GQ02772_E12 cluster=GQ02830_D20 status=5												contig22999	1e-147	98	521	length=689 numreads=6	contig05910	1e-153	98	539	length=489 numreads=4
Unigene1111_Taxus	GQ03208_J17.2	203	273	386	316	61/71		5e-08	85	61.9	clone=GQ03208_J17 cluster=GQ03208_J17 status=complete gb=BT109453	GQ03208_J17.2	203	273	386	316	61/71		1e-08	85	61.9	clone=GQ03208_J17 cluster=GQ03208_J17 status=complete gb=BT109453
Unigene1112_Taxus
Unigene1113_Taxus
Unigene1114_Taxus																							contig32997	8e-51	100	198	length=121 numreads=20	contig06353	7e-09	100	58	length=384 numreads=3
Unigene1115_Taxus
Unigene1116_Taxus	WS0322_O23.1	231	265	167	133	33/35		2e-06	94	54	clone=WS0322_O23 cluster=WS0322_O23 status=3	WS0322_O23.1	231	265	167	133	33/35		4e-07	94	54	clone=WS0322_O23 cluster=WS0322_O23 status=3	contig09576	9e-08	80	56	length=1546 numreads=40
Unigene1117_Taxus	GQ0064_B12.1	200	882	723	41	558/683		7e-99	81	363	clone=GQ0064_B12 cluster=GQ03914_L12 status=3	GQ03914_L12.1	200	800	639	39	489/601		1e-81	81	303	clone=GQ03914_L12 cluster=GQ03914_L12 status=complete gb=BT117857	contig08667	0	97	1425	length=1265 numreads=75	FXAT9O003C2OHQ	0	97	716
Unigene1118_Taxus																							contig06821	9e-60	98	228	length=995 numreads=29
Unigene1119_Taxus
Unigene1120_Taxus	GQ03229_C04.1	378	853	692	217	396/476		9e-83	83	309	clone=GQ03229_C04 cluster=GQ03108_O09 status=5	GQ03108_O09.2	378	853	1527	1052	394/476		1e-78	82	293	clone=GQ03108_O09 cluster=GQ03108_O09 status=complete gb=BT107543	contig01532	0	99	1665	length=2039 numreads=36
Unigene1121_Taxus																							contig21115	1e-128	98	458	length=657 numreads=17
Unigene1122_Taxus
Unigene1123_Taxus																							contig17633	1e-144	99	509	length=1270 numreads=28	FXAT9O003DMIUB	4e-84	93	309
Unigene1124_Taxus																												contig06263	5e-10	86	61.9	length=123 numreads=3
Unigene1125_Taxus																							contig25030	1e-25	100	115	length=1205 numreads=38
Unigene1126_Taxus																							contig32991	1e-06	100	54	length=475 numreads=12
Unigene1127_Taxus																							contig17466	5e-65	83	248	length=499 numreads=21
Unigene1128_Taxus	GQ04113_H24.2	1522	2434	174	1080	760/913		1e-163	83	579	clone=GQ04113_H24 cluster=GQ04113_H24 status=5	GQ04113_H24.2	1522	2434	174	1080	760/913		1e-164	83	579	clone=GQ04113_H24 cluster=GQ04113_H24 status=5	contig27291	0	99	1247	length=784 numreads=9
Unigene1129_Taxus																							contig25756	6e-06	90	50.1	length=1205 numreads=11
Unigene1130_Taxus	GQ0042_A21.1	524	1184	732	72	568/661		1e-162	85	573	clone=GQ0042_A21 cluster=GQ03115_D19 status=5	GQ03115_D19.1	618	1184	601	35	493/567		1e-152	86	537	clone=GQ03115_D19 cluster=GQ03115_D19 status=complete gb=BT107974	contig12194	0	98	1834	length=1022 numreads=39	FXAT9O003DO2RL	0	98	809
Unigene1131_Taxus	GQ03308_L12.1	338	622	628	346	231/286		1e-22	80	109	clone=GQ03308_L12 cluster=GQ03308_L12 status=complete gb=BT112006	GQ03308_L12.1	338	622	628	346	231/286		2e-23	80	109	clone=GQ03308_L12 cluster=GQ03308_L12 status=complete gb=BT112006	contig03827	0	97	1227	length=1092 numreads=14
Unigene1132_Taxus	GQ02826_D14.1	101	559	594	136	392/459		1e-103	85	379	clone=GQ02826_D14 cluster=GQ02816_J18 status=complete	GQ02816_J18.1	101	559	748	290	390/459		1e-99	84	363	clone=GQ02816_J18 cluster=GQ02816_J18 status=complete gb=BT104920	contig03300	0	99	1235	length=910 numreads=26	contig01306	0	98	1277	length=676 numreads=5
Unigene1133_Taxus																							contig24529	1e-16	100	85.7	length=540 numreads=5	FXAT9O003C6NPK	1e-13	91	73.8
Unigene1134_Taxus	WS00728_F17.1	80	207	153	26	107/128		5e-16	83	87.7	clone=WS00728_F17 cluster=WS00728_F17 status=3	WS00728_F17.1	80	207	153	26	107/128		8e-17	83	87.7	clone=WS00728_F17 cluster=WS00728_F17 status=3						FXAT9O003C0K00	1e-127	96	454
Unigene1135_Taxus																							contig06127	8e-12	89	69.9	length=615 numreads=31
Unigene1136_Taxus	GQ0068_C21.1	35	122	93	6	74/88	5' read(R)	5e-09	84	63.9	clone=GQ0068_C21 cluster=GQ0068_C21 status=complete gb=BT101124	GQ0068_C21.1	35	122	93	6	74/88	5' read(R)	9e-10	84	63.9	clone=GQ0068_C21 cluster=GQ0068_C21 status=complete gb=BT101124
Unigene1137_Taxus	GQ00410_C09.1	171	671	3	499	428/501	5' read(F)	1e-113	85	412	clone=GQ00410_C09 cluster=GQ00410_C09 status=complete gb=BT100668	GQ00410_C09.1	171	671	3	499	428/501	5' read(F)	1e-114	85	412	clone=GQ00410_C09 cluster=GQ00410_C09 status=complete gb=BT100668	contig21235	8e-55	98	214	length=450 numreads=5	FXAT9O003DM3HN	2e-44	98	178
Unigene1138_Taxus	GQ0068_I07.1	207	258	258	309	46/52		1e-06	88	56	clone=GQ0068_I07 cluster=GQ0068_I07 status=complete gb=BT101132	GQ0068_I07.1	207	258	258	309	46/52		3e-07	88	56	clone=GQ0068_I07 cluster=GQ0068_I07 status=complete gb=BT101132	contig05222	0	100	664	length=1471 numreads=78
Unigene1139_Taxus
Unigene1140_Taxus																							contig33352	1e-103	94	373	length=686 numreads=12
Unigene1141_Taxus																							contig19278	2e-76	98	283	length=1142 numreads=14
Unigene1142_Taxus	GQ0202_N02.1	119	234	586	701	101/116		5e-23	87	111	clone=GQ0202_N02 cluster=GQ0202_N02 status=5	GQ0202_N02.1	119	234	586	701	101/116		1e-23	87	111	clone=GQ0202_N02 cluster=GQ0202_N02 status=5	contig03301	1e-145	84	513	length=1036 numreads=33	contig00472	2e-93	87	341	length=1838 numreads=29
Unigene1143_Taxus																							contig32668	1e-108	98	389	length=216 numreads=5	FXAT9O003DLCR3	9e-81	97	297
Unigene1144_Taxus																							contig01175	0	97	702	length=4022 numreads=96
Unigene1145_Taxus	GQ02828_D02.2	19	99	126	46	68/81		2e-07	83	58	clone=GQ02828_D02 cluster=GQ02828_D02 status=complete gb=BT105769	GQ02828_D02.2	19	99	126	46	68/81		4e-08	83	58	clone=GQ02828_D02 cluster=GQ02828_D02 status=complete gb=BT105769	contig08579	1e-137	98	486	length=356 numreads=12
Unigene1146_Taxus	GQ03321_G21.1	749	1009	431	171	211/261		1e-25	80	121	clone=GQ03321_G21 cluster=GQ03303_N09 status=5	GQ03303_N09.1	749	1009	730	471	211/261		5e-24	80	113	clone=GQ03303_N09 cluster=GQ03303_N09 status=complete gb=BT111804	contig05058	0	98	2934	length=1682 numreads=30	FXAT9O003C8J3C	0	99	1027
Unigene1147_Taxus																							contig06701	5e-48	85	190	length=605 numreads=89	FXAT9O003C4K56	1e-117	96	420
Unigene1148_Taxus	WS00750_O20.1	257	313	195	251	50/57		3e-07	87	58	clone=WS00750_O20 cluster=GQ03304_O01 status=complete												contig17237	1e-115	96	414	length=369 numreads=14
Unigene1149_Taxus
Unigene1150_Taxus																							contig24842	1e-64	97	246	length=592 numreads=8
Unigene1151_Taxus																							contig10041	3e-42	100	170	length=1268 numreads=96	FXAT9O003CZAKC	5e-26	100	115
Unigene1152_Taxus																							contig29441	0	98	1471	length=806 numreads=15	contig05280	9e-62	80	236	length=723 numreads=4
Unigene1153_Taxus
Unigene1154_Taxus	GQ03608_D04.2	3234	3667	28	461	380/434		1e-119	87	432	clone=GQ03608_D04 cluster=GQ03608_D04 status=complete gb=BT115059	GQ03608_D04.2	3234	3667	28	461	380/434		1e-120	87	432	clone=GQ03608_D04 cluster=GQ03608_D04 status=complete gb=BT115059	contig16497	0	99	2224	length=1146 numreads=33	FXAT9O003DMXSP	0	99	948
Unigene1155_Taxus																							contig19671	8e-74	96	276	length=745 numreads=10
Unigene1156_Taxus	GQ03206_D22.3	699	1472	1116	346	645/774		1e-142	83	507	clone=GQ03206_D22 cluster=GQ03206_D22 status=complete gb=BT109237	GQ03206_D22.3	699	1472	1116	346	645/774		1e-143	83	507	clone=GQ03206_D22 cluster=GQ03206_D22 status=complete gb=BT109237	contig32577	0	98	2042	length=1406 numreads=20	contig03303	0	99	878	length=454 numreads=2
Unigene1157_Taxus																							contig26516	6e-17	84	87.7	length=916 numreads=10
Unigene1158_Taxus
Unigene1159_Taxus																							contig22200	1e-104	96	377	length=1099 numreads=31
Unigene1160_Taxus
Unigene1161_Taxus	GQ04005_J03.1	1258	1524	652	386	233/267		1e-67	87	260	clone=GQ04005_J03 cluster=GQ04105_L03 status=5	GQ04105_L03.1	1258	1524	671	405	232/267		5e-66	86	252	clone=GQ04105_L03 cluster=GQ04105_L03 status=complete gb=BT119439	contig28822	1e-167	99	587	length=308 numreads=3	contig04451	0	99	1134	length=600 numreads=4
Unigene1162_Taxus																							contig23521	4e-37	94	153	length=1508 numreads=30
Unigene1163_Taxus	GQ03316_O13.1	151	423	427	158	226/273		4e-39	82	165	clone=GQ03316_O13 cluster=GQ04007_I18 status=complete	GQ04007_I18.2	994	1219	443	218	189/226		7e-37	83	155	clone=GQ04007_I18 cluster=GQ04007_I18 status=complete gb=BT118543	contig16916	0	98	1130	length=909 numreads=19
Unigene1164_Taxus																												FXAT9O003CZAN9	1e-32	100	137
Unigene1165_Taxus																							contig09494	1e-14	90	79.8	length=825 numreads=13	FXAT9O003DFZBH	3e-19	89	93.7
Unigene1166_Taxus																							contig30131	1e-109	97	394	length=349 numreads=6	FXAT9O003CWQS4	1e-101	96	365
Unigene1167_Taxus
Unigene1168_Taxus																							contig07319	3e-74	96	280	length=1332 numreads=42	contig04076	5e-24	94	111	length=453 numreads=3
Unigene1169_Taxus																							contig34239	2e-62	100	238	length=208 numreads=6	FXAT9O003C5D0W	8e-60	99	228
Unigene1170_Taxus																							contig12677	8e-54	96	208	length=1438 numreads=20
Unigene1171_Taxus	GQ03322_M08.1	167	545	652	274	342/379		1e-127	90	458	clone=GQ03322_M08 cluster=GQ03801_K08 status=5	GQ03801_K08.1	167	545	794	416	340/379		1e-123	89	442	clone=GQ03801_K08 cluster=GQ03801_K08 status=complete gb=BT116544	contig20565	0	98	783	length=739 numreads=21	contig01436	1e-176	99	615	length=490 numreads=4
Unigene1172_Taxus	GQ03706_B15.1	377	422	1530	1575	45/46		4e-15	97	83.8	clone=GQ03706_B15 cluster=GQ03706_B15 status=complete gb=BT115784	GQ03706_B15.1	377	422	1530	1575	45/46		8e-16	97	83.8	clone=GQ03706_B15 cluster=GQ03706_B15 status=complete gb=BT115784
Unigene1173_Taxus																												FXAT9O003CWV6R	1e-172	97	603
Unigene1174_Taxus																							contig23504	0	97	993	length=1286 numreads=22
Unigene1175_Taxus																							contig31548	0	98	700	length=374 numreads=4	contig00695	0	99	1475	length=1721 numreads=23
Unigene1176_Taxus
Unigene1177_Taxus
Unigene1178_Taxus																							contig10487	0	99	654	length=344 numreads=22
Unigene1179_Taxus																							contig10955	1e-166	98	583	length=1423 numreads=27
Unigene1180_Taxus
Unigene1181_Taxus																							contig14452	6e-59	99	226	length=427 numreads=5
Unigene1182_Taxus																							contig19100	2e-49	98	194	length=434 numreads=3	FXAT9O003DEUZ9	7e-47	98	184
Unigene1183_Taxus
Unigene1184_Taxus
Unigene1185_Taxus
Unigene1186_Taxus																							contig09482	4e-08	100	58	length=1760 numreads=59
Unigene1187_Taxus
Unigene1188_Taxus
Unigene1189_Taxus																							contig01728	0	97	894	length=657 numreads=10	contig05280	3e-54	83	210	length=723 numreads=4
Unigene1190_Taxus																							contig29059	1e-103	95	373	length=413 numreads=12	contig07096	1e-117	98	418	length=366 numreads=3
Unigene1191_Taxus																							contig30839	1e-145	98	513	length=275 numreads=3
Unigene1192_Taxus
Unigene1193_Taxus																							contig04084	0	97	2353	length=1595 numreads=67	contig07316	1e-160	98	563	length=300 numreads=3
Unigene1194_Taxus	GQ02901_H16.1	249	894	388	1033	571/646		0	88	686	clone=GQ02901_H16 cluster=GQ02901_H16 status=complete gb=BT106022	GQ02901_H16.1	249	894	388	1033	571/646		0	88	686	clone=GQ02901_H16 cluster=GQ02901_H16 status=complete gb=BT106022	contig10773	0	95	969	length=592 numreads=7	contig01195	1e-169	94	593	length=424 numreads=3
Unigene1195_Taxus
Unigene1196_Taxus																							contig01528	0	96	648	length=427 numreads=10
Unigene1197_Taxus																												FXAT9O003DK1NC	1e-105	98	379
Unigene1198_Taxus																							contig10686	1e-07	100	58	length=760 numreads=9
Unigene1199_Taxus	WS00741_G14.1	1	133	85	217	111/133		5e-17	83	89.7	clone=WS00741_G14 cluster=GQ02823_I20 status=complete	GQ02823_I20.1	1	133	872	1004	111/133		9e-18	83	89.7	clone=GQ02823_I20 cluster=GQ02823_I20 status=complete gb=BT105511	contig08349	1e-78	98	291	length=948 numreads=118	contig06975	1e-155	98	543	length=385 numreads=2
Unigene1200_Taxus																							contig26430	9e-58	98	222	length=1084 numreads=25
Unigene1201_Taxus																							contig33275	3e-59	97	226	length=151 numreads=12
Unigene1202_Taxus																							contig12292	6e-46	96	182	length=110 numreads=12
Unigene1203_Taxus																												FXAT9O003DHPSJ	8e-38	94	155
Unigene1204_Taxus	WS00720_B13.1	293	428	231	96	119/136		2e-30	87	135	clone=WS00720_B13 cluster=GQ0133_D21 status=3	GQ0133_D21.1	187	244	166	108	53/59		5e-09	89	61.9	clone=GQ0133_D21 cluster=GQ0133_D21 status=3	contig32416	2e-66	99	252	length=407 numreads=4	FXAT9O003DQYZQ	3e-32	87	137
Unigene1205_Taxus																							contig02329	1e-10	90	65.9	length=1335 numreads=54	contig02219	5e-11	90	65.9	length=487 numreads=2
Unigene1206_Taxus
Unigene1207_Taxus	GQ02010_K21.1	11	627	617	1	526/618	5' read(R)	1e-134	85	480	clone=GQ02010_K21 cluster=GQ02010_K21 status=complete gb=BT102668	GQ02010_K21.1	11	627	617	1	526/618	5' read(R)	1e-134	85	480	clone=GQ02010_K21 cluster=GQ02010_K21 status=complete gb=BT102668	contig20735	2e-89	97	329	length=341 numreads=2	contig06193	0	98	668	length=353 numreads=2
Unigene1208_Taxus	GQ03112_B03.1	195	949	757	3	669/755	5' read(R)	0	88	815	clone=GQ03112_B03 cluster=GQ03112_B03 status=complete gb=BT107732	GQ03112_B03.1	195	949	757	3	669/755	5' read(R)	0	88	815	clone=GQ03112_B03 cluster=GQ03112_B03 status=complete gb=BT107732	contig18806	0	99	2436	length=1431 numreads=20	FXAT9O003DGVPL	0	98	862
Unigene1209_Taxus	GQ02771_E01.1	259	877	262	881	507/620	3' read(F)	2e-87	81	325	clone=GQ02771_E01 cluster=GQ02771_E01 status=5	GQ02771_E01.1	259	877	262	881	507/620	3' read(F)	4e-88	81	325	clone=GQ02771_E01 cluster=GQ02771_E01 status=5	contig09396	0	96	1764	length=2979 numreads=187	contig04926	0	97	704	length=421 numreads=2
Unigene1210_Taxus	GQ03604_I16.1	184	249	968	903	58/66		1e-10	87	67.9	clone=GQ03604_I16 cluster=GQ03604_I16 status=complete gb=BT114889	GQ03604_I16.1	184	249	968	903	58/66		3e-11	87	67.9	clone=GQ03604_I16 cluster=GQ03604_I16 status=complete gb=BT114889	contig20487	6e-24	94	109	length=824 numreads=18	FXAT9O003C7ILE	5e-47	95	184
Unigene1211_Taxus
Unigene1212_Taxus																							contig08830	2e-48	96	190	length=1321 numreads=28
Unigene1213_Taxus	GQ04003_N05.1	395	2023	2167	542	1355/1629		0	83	1053	clone=GQ04003_N05 cluster=GQ04003_N05 status=complete gb=BT118226	GQ04003_N05.1	395	2023	2167	542	1355/1629		0	83	1053	clone=GQ04003_N05 cluster=GQ04003_N05 status=complete gb=BT118226	contig08074	0	98	3887	length=2179 numreads=53	contig03825	0	98	1306	length=702 numreads=5
Unigene1214_Taxus	WS0336_M13.1	135	262	676	549	110/128		2e-23	85	111	clone=WS0336_M13 cluster=GQ0257_H22 status=complete	GQ0257_H22.1	135	262	532	659	110/128		4e-24	85	111	clone=GQ0257_H22 cluster=GQ0257_H22 status=complete gb=BT103574	contig10330	1e-134	99	478	length=1112 numreads=25
Unigene1215_Taxus	WS00113_K16.1	94	136	7	49	43/43	5' read(F)	8e-16	100	85.7	clone=WS00113_K16 cluster=GQ03713_I20 status=3	GQ03222_J01.2	95	136	641	600	42/42		6e-16	100	83.8	clone=GQ03222_J01 cluster=GQ03222_J01 status=complete gb=BT110491	contig12610	1e-133	92	474	length=1264 numreads=124	contig05281	3e-58	99	222	length=1106 numreads=14
Unigene1216_Taxus	GQ00611_J10.1	1	229	450	673	191/229		3e-36	83	153	clone=GQ00611_J10 cluster=GQ03516_G20 status=complete	GQ03516_G20.1	1	229	1472	1695	190/229		1e-34	82	145	clone=GQ03516_G20 cluster=GQ03516_G20 status=complete gb=BT114534	contig26332	1e-109	96	392	length=1042 numreads=7	FXAT9O003DDUTG	1e-111	96	398
Unigene1217_Taxus
Unigene1218_Taxus	GQ0209_E12.1	110	410	12	312	252/301		2e-52	83	208	clone=GQ0209_E12 cluster=GQ02804_K09 status=3	GQ02804_K09.1	110	410	855	1155	251/301		1e-50	83	200	clone=GQ02804_K09 cluster=GQ02804_K09 status=complete gb=BT103957	contig13629	1e-162	98	571	length=307 numreads=4	FXAT9O003DNP1Y	1e-07	92	56
Unigene1219_Taxus	GQ0042_H14.1	169	244	302	377	66/76		9e-12	86	71.9	clone=GQ0042_H14 cluster=GQ0042_H14 status=complete gb=BT100759	GQ0042_H14.1	169	244	302	377	66/76		2e-12	86	71.9	clone=GQ0042_H14 cluster=GQ0042_H14 status=complete gb=BT100759	contig08075	9e-51	99	198	length=1414 numreads=26
Unigene1220_Taxus
Unigene1221_Taxus
Unigene1222_Taxus
Unigene1223_Taxus
Unigene1224_Taxus																							contig18292	3e-14	88	77.8	length=389 numreads=2
Unigene1225_Taxus																							contig33464	5e-98	98	355	length=746 numreads=87
Unigene1226_Taxus	GQ03514_I12.4	147	718	858	284	505/575		1e-164	87	581	clone=GQ03514_I12 cluster=GQ03514_I12 status=complete gb=BT114442	GQ03514_I12.4	147	718	858	284	505/575		1e-165	87	581	clone=GQ03514_I12 cluster=GQ03514_I12 status=complete gb=BT114442	contig18520	0	98	1324	length=1149 numreads=21	FXAT9O003C8RKP	1e-152	99	535
Unigene1227_Taxus	WS03410_D15.1	423	479	302	246	53/57		2e-14	92	81.8	clone=WS03410_D15 cluster=GQ02807_A07 status=complete	GQ02807_A07.1	423	479	540	484	53/57		4e-15	92	81.8	clone=GQ02807_A07 cluster=GQ02807_A07 status=complete gb=BT104157	contig29114	0	97	706	length=796 numreads=17
Unigene1228_Taxus
Unigene1229_Taxus	GQ02817_O07.1	539	1498	114	1079	822/966		0	85	765	clone=GQ02817_O07 cluster=GQ03216_A12 status=complete	GQ03216_A12.1	539	1240	616	1323	596/708		1e-143	84	507	clone=GQ03216_A12 cluster=GQ03216_A12 status=complete gb=BT110081	contig04649	0	99	2462	length=1746 numreads=35	FXAT9O003C1A1X	1e-180	99	628
Unigene1230_Taxus	WS0076_O18.1	584	646	298	236	56/63		2e-10	88	69.9	clone=WS0076_O18 cluster=GQ03227_G12 status=3	GQ03227_G12.2	584	646	985	923	55/63		8e-09	87	61.9	clone=GQ03227_G12 cluster=GQ03227_G12 status=complete gb=BT110755	contig17851	1e-152	87	537	length=554 numreads=48	contig04982	1e-140	93	496	length=367 numreads=2
Unigene1231_Taxus
Unigene1232_Taxus
Unigene1233_Taxus
Unigene1234_Taxus
Unigene1235_Taxus
Unigene1236_Taxus	GQ04109_P17.1	1707	1981	1	275	231/275	5' read(F)	2e-48	84	196	clone=GQ04109_P17 cluster=GQ04109_P17 status=complete gb=BT119783	GQ04109_P17.1	1707	1981	1	275	231/275	5' read(F)	4e-49	84	196	clone=GQ04109_P17 cluster=GQ04109_P17 status=complete gb=BT119783						FXAT9O003C993G	1e-176	98	617
Unigene1237_Taxus
Unigene1238_Taxus																												FXAT9O003C72PY	0	97	733
Unigene1239_Taxus	GQ00412_E16.1	215	1227	1165	155	863/1013		0	85	827	clone=GQ00412_E16 cluster=GQ03117_L03 status=complete	GQ03117_L03.1	215	1227	1141	131	862/1013		0	85	819	clone=GQ03117_L03 cluster=GQ03117_L03 status=complete gb=BT108166	contig18971	0	98	2585	length=1570 numreads=27	FXAT9O003C2N2Q	7e-81	99	299
Unigene1240_Taxus	GQ0207_A22.1	1209	1442	621	388	193/234		3e-31	82	139	clone=GQ0207_A22 cluster=GQ0207_A22 status=53	GQ0207_A22.1	1209	1442	621	388	193/234		6e-32	82	139	clone=GQ0207_A22 cluster=GQ0207_A22 status=53	contig22079	0	99	1158	length=660 numreads=55
Unigene1241_Taxus	GQ03121_J07.4	531	1828	1633	337	1151/1298		0	88	1400	clone=GQ03121_J07 cluster=GQ03121_J07 status=complete gb=BT108420	GQ03121_J07.4	531	1828	1633	337	1151/1298		0	88	1400	clone=GQ03121_J07 cluster=GQ03121_J07 status=complete gb=BT108420	contig16652	0	99	3360	length=1730 numreads=60	contig05488	0	99	1409	length=723 numreads=7
Unigene1242_Taxus
Unigene1243_Taxus																							contig05399	3e-95	91	347	length=1310 numreads=30
Unigene1244_Taxus
Unigene1245_Taxus	GQ01304_A06.1	728	1032	25	332	264/308		4e-67	85	258	clone=GQ01304_A06 cluster=GQ03230_M23 status=complete	GQ03230_M23.1	728	931	595	801	175/207		3e-36	84	153	clone=GQ03230_M23 cluster=GQ03230_M23 status=complete gb=BT110986	contig12889	0	99	1443	length=1474 numreads=23
Unigene1246_Taxus																												contig03073	1e-22	96	103	length=467 numreads=2
Unigene1247_Taxus																							contig28854	7e-44	82	176	length=627 numreads=6
Unigene1248_Taxus																							contig25798	5e-49	99	192	length=820 numreads=4
Unigene1249_Taxus																							contig11567	8e-08	86	56	length=802 numreads=22
Unigene1250_Taxus	GQ02819_N11.1	133	853	249	969	606/721		1e-145	84	517	clone=GQ02819_N11 cluster=GQ02902_L14 status=complete	GQ02902_L14.2	133	853	264	985	604/722		1e-137	83	488	clone=GQ02902_L14 cluster=GQ02902_L14 status=complete gb=BT106086	contig13738	1e-87	82	323	length=1466 numreads=39	contig00664	1e-66	81	252	length=1304 numreads=60
Unigene1251_Taxus	GQ03712_A14.4	807	850	1121	1078	40/44		3e-06	90	56	clone=GQ03712_A14 cluster=GQ03712_A14 status=complete gb=BT116112	GQ03712_A14.4	807	850	1121	1078	40/44		5e-07	90	56	clone=GQ03712_A14 cluster=GQ03712_A14 status=complete gb=BT116112	contig28950	0	99	745	length=449 numreads=4
Unigene1252_Taxus	GQ0074_B22.1	519	944	145	570	346/426		7e-53	81	210	clone=GQ0074_B22 cluster=GQ04104_C12 status=complete	GQ04104_C12.1	519	944	510	931	342/426		2e-43	80	176	clone=GQ04104_C12 cluster=GQ04104_C12 status=complete gb=BT119320	contig04003	0	98	2032	length=1294 numreads=18	FXAT9O003C3PG8	1e-177	98	618
Unigene1253_Taxus
Unigene1254_Taxus	GQ03236_O15.1	2617	3314	83	786	581/707		1e-111	82	406	clone=GQ03236_O15 cluster=GQ03207_D19 status=5	GQ03207_D19.2	2617	3314	1124	1826	581/707		1e-110	82	398	clone=GQ03207_D19 cluster=GQ03207_D19 status=complete gb=BT109329	contig26692	0	99	3616	length=1884 numreads=20	FXAT9O003C5511	0	99	767
Unigene1255_Taxus																												FXAT9O003C7QAQ	3e-42	100	168
Unigene1256_Taxus																							contig31686	7e-42	98	168	length=323 numreads=3
Unigene1257_Taxus																							contig09036	0	99	690	length=1932 numreads=20
Unigene1258_Taxus
Unigene1259_Taxus																							contig05557	1e-46	98	184	length=1301 numreads=109
Unigene1260_Taxus																							contig29006	1e-108	93	391	length=415 numreads=4	FXAT9O003DG5X7	1e-08	88	58
Unigene1261_Taxus	GQ03210_D17.1	647	1055	1031	629	340/409		2e-69	83	266	clone=GQ03210_D17 cluster=GQ02806_H21 status=complete	GQ02806_H21.1	647	1055	1031	629	339/409		9e-68	82	258	clone=GQ02806_H21 cluster=GQ02806_H21 status=complete gb=BT104104	contig17224	0	98	3003	length=1681 numreads=56
Unigene1262_Taxus																							contig12031	1e-160	97	563	length=809 numreads=31	FXAT9O003C1QPR	1e-122	95	436
Unigene1263_Taxus																							contig24002	2e-20	85	99.6	length=1170 numreads=41
Unigene1264_Taxus																							contig12402	5e-49	99	192	length=625 numreads=13
Unigene1265_Taxus
Unigene1266_Taxus
Unigene1267_Taxus	GQ02827_G23.1	426	1227	1156	358	687/802		0	85	674	clone=GQ02827_G23 cluster=GQ02827_G23 status=complete gb=BT105738	GQ02827_G23.1	426	1227	1156	358	687/802		0	85	674	clone=GQ02827_G23 cluster=GQ02827_G23 status=complete gb=BT105738	contig19530	0	98	1130	length=804 numreads=10
Unigene1268_Taxus
Unigene1269_Taxus																							contig23822	2e-24	100	111	length=535 numreads=10
Unigene1270_Taxus																							contig31571	1e-113	95	410	length=363 numreads=8
Unigene1271_Taxus	GQ04101_A08.1	3	137	858	724	115/135		1e-22	85	109	clone=GQ04101_A08 cluster=GQ04101_A08 status=complete gb=BT119070	GQ04101_A08.1	3	137	858	724	115/135		3e-23	85	109	clone=GQ04101_A08 cluster=GQ04101_A08 status=complete gb=BT119070	contig04149	0	96	912	length=1756 numreads=17	FXAT9O003DBTJH	0	95	640
Unigene1272_Taxus	GQ03119_F18.1	292	1006	876	162	608/715		1e-160	85	569	clone=GQ03119_F18 cluster=GQ0208_A13 status=complete	GQ0208_A13.1	292	1006	1036	322	608/715		1e-161	85	569	clone=GQ0208_A13 cluster=GQ0208_A13 status=complete gb=BT103188	contig18324	0	98	3729	length=2120 numreads=65	contig03442	0	98	837	length=456 numreads=3
Unigene1273_Taxus
Unigene1274_Taxus
Unigene1275_Taxus																							contig07787	0	96	700	length=445 numreads=6	FXAT9O003CYC9D	1e-159	94	559
Unigene1276_Taxus																							contig12479	1e-172	99	603	length=1204 numreads=51	FXAT9O003CY6DK	3e-19	87	93.7
Unigene1277_Taxus																												FXAT9O003C415A	1e-142	97	502
Unigene1278_Taxus	GQ02828_O02.1	133	204	102	31	63/72		8e-12	87	71.9	clone=GQ02828_O02 cluster=GQ02809_M05 status=complete	GQ02809_M05.2	133	204	1273	1202	63/72		1e-12	87	71.9	clone=GQ02809_M05 cluster=GQ02809_M05 status=complete gb=BT104380	contig17370	1e-107	96	387	length=1493 numreads=26
Unigene1279_Taxus
Unigene1280_Taxus																							contig06617	3e-93	97	339	length=998 numreads=45	contig03315	6e-09	100	58	length=893 numreads=25
Unigene1281_Taxus	WS03225_P21.1	406	519	488	375	95/114		1e-12	83	75.8	clone=WS03225_P21 cluster=GQ04112_D18 status=3	GQ04112_D18.1	406	519	219	106	94/114		5e-11	82	67.9	clone=GQ04112_D18 cluster=GQ04112_D18 status=complete gb=BT119910	contig04248	1e-153	98	539	length=1092 numreads=20	contig01435	1e-18	98	91.7	length=1046 numreads=7
Unigene1282_Taxus	WS03222_M03.1	198	356	238	80	143/159		1e-46	89	188	clone=WS03222_M03 cluster=GQ03235_J20 status=complete	GQ03235_J20.1	198	356	729	571	143/159		3e-47	89	188	clone=GQ03235_J20 cluster=GQ03235_J20 status=complete gb=BT111297	contig21656	0	98	1132	length=1374 numreads=63	contig04321	8e-14	87	75.8	length=433 numreads=2
Unigene1283_Taxus																							contig34946	6e-43	90	172	length=628 numreads=40
Unigene1284_Taxus	GQ03219_H18.1	1310	1412	1	103	86/103	5' read(F)	2e-10	83	69.9	clone=GQ03219_H18 cluster=GQ03219_H18 status=complete gb=BT110298	GQ03219_H18.1	1310	1412	1	103	86/103	5' read(F)	4e-11	83	69.9	clone=GQ03219_H18 cluster=GQ03219_H18 status=complete gb=BT110298	contig10995	0	99	674	length=459 numreads=9
Unigene1285_Taxus																							contig16419	7e-33	95	139	length=157 numreads=4
Unigene1286_Taxus																							contig11039	2e-51	100	200	length=518 numreads=8
Unigene1287_Taxus																							contig24034	1e-82	95	305	length=591 numreads=19
Unigene1288_Taxus
Unigene1289_Taxus																							contig27276	6e-57	100	220	length=266 numreads=2	FXAT9O003DJ3A1	1e-162	97	567
Unigene1290_Taxus												GQ03320_F23.1	501	546	471	516	41/46		4e-06	89	52	clone=GQ03320_F23 cluster=GQ03320_F23 status=complete gb=BT112749
Unigene1291_Taxus
Unigene1292_Taxus	GQ04102_I16.1	73	197	41	162	106/125		2e-18	84	93.7	clone=GQ04102_I16 cluster=GQ04102_I16 status=complete gb=BT119189	GQ04102_I16.1	73	197	41	162	106/125		4e-19	84	93.7	clone=GQ04102_I16 cluster=GQ04102_I16 status=complete gb=BT119189	contig13128	1e-109	95	392	length=1379 numreads=44
Unigene1293_Taxus	GQ03301_E18.1	265	914	851	196	559/656		1e-150	85	533	clone=GQ03301_E18 cluster=GQ03301_E18 status=complete gb=BT111612	GQ03301_E18.1	265	914	851	196	559/656		1e-151	85	533	clone=GQ03301_E18 cluster=GQ03301_E18 status=complete gb=BT111612	contig09597	0	98	1475	length=799 numreads=24
Unigene1294_Taxus	WS00810_D08.1	44	101	256	199	52/58		1e-10	89	67.9	clone=WS00810_D08 cluster=GQ03234_L17 status=complete	GQ03234_L17.1	44	101	545	488	52/58		2e-11	89	67.9	clone=GQ03234_L17 cluster=GQ03234_L17 status=complete gb=BT111244
Unigene1295_Taxus																							contig07601	1e-108	97	389	length=1549 numreads=117
Unigene1296_Taxus	GQ04013_L13.1	114	230	375	259	98/117		1e-14	83	81.8	clone=GQ04013_L13 cluster=GQ04013_L13 status=complete gb=BT119039	GQ04013_L13.1	114	230	375	259	98/117		2e-15	83	81.8	clone=GQ04013_L13 cluster=GQ04013_L13 status=complete gb=BT119039	contig10050	1e-104	95	377	length=641 numreads=71
Unigene1297_Taxus																							contig20660	2e-52	96	204	length=373 numreads=2
Unigene1298_Taxus
Unigene1299_Taxus	GQ03412_J12.1	4	255	402	151	209/252		2e-37	82	159	clone=GQ03412_J12 cluster=GQ03718_G02 status=complete	GQ03718_G02.1	4	255	1175	924	208/252		9e-36	82	151	clone=GQ03718_G02 cluster=GQ03718_G02 status=complete gb=BT116418						FXAT9O003DOFFL	2e-62	85	238
Unigene1300_Taxus	GQ03313_E20.1	365	1162	1029	238	667/798		1e-150	83	535	clone=GQ03313_E20 cluster=GQ03313_E20 status=complete gb=BT112307	GQ03313_E20.1	365	1162	1029	238	667/798		1e-151	83	535	clone=GQ03313_E20 cluster=GQ03313_E20 status=complete gb=BT112307	contig03873	0	99	1740	length=1378 numreads=92	contig02585	0	99	1296	length=680 numreads=5
Unigene1301_Taxus																												contig04376	4e-30	100	129	length=403 numreads=3
Unigene1302_Taxus																							contig03968	5e-49	99	192	length=613 numreads=11
Unigene1303_Taxus																							contig34504	2e-29	91	127	length=314 numreads=8
Unigene1304_Taxus
Unigene1305_Taxus	GQ03105_D22.1	633	1451	869	48	706/822		0	85	706	clone=GQ03105_D22 cluster=GQ03105_D22 status=complete gb=BT107276	GQ03105_D22.1	633	1451	869	48	706/822		0	85	706	clone=GQ03105_D22 cluster=GQ03105_D22 status=complete gb=BT107276	contig20759	0	99	3307	length=1707 numreads=47	FXAT9O003DC44O	0	98	787
Unigene1306_Taxus
Unigene1307_Taxus
Unigene1308_Taxus
Unigene1309_Taxus
Unigene1310_Taxus																												FXAT9O003C3Q2A	1e-51	100	200
Unigene1311_Taxus																							contig14011	2e-80	98	297	length=1753 numreads=72	contig00435	2e-34	93	143	length=1560 numreads=30
Unigene1312_Taxus	GQ02814_A03.4	1117	1701	480	1061	500/585		1e-134	85	482	clone=GQ02814_A03 cluster=GQ02814_A03 status=complete gb=BT104720	GQ02814_A03.4	1117	1701	480	1061	500/585		1e-135	85	482	clone=GQ02814_A03 cluster=GQ02814_A03 status=complete gb=BT104720	contig11651	0	99	2012	length=1057 numreads=26	FXAT9O003CWYOS	0	99	922
Unigene1313_Taxus
Unigene1314_Taxus	WS00736_L05.1	461	766	221	526	268/306		1e-81	87	305	clone=WS00736_L05 cluster=GQ02904_O11 status=3	GQ02904_O11.1	461	766	369	674	267/306		6e-80	87	297	clone=GQ02904_O11 cluster=GQ02904_O11 status=complete gb=BT106201	contig19869	0	98	1816	length=1092 numreads=73	contig03649	0	98	1292	length=747 numreads=8
Unigene1315_Taxus	GQ02807_E09.2	212	255	435	478	40/44		5e-07	90	56	clone=GQ02807_E09 cluster=GQ02807_E09 status=complete gb=BT104181	GQ02807_E09.2	212	255	435	478	40/44		1e-07	90	56	clone=GQ02807_E09 cluster=GQ02807_E09 status=complete gb=BT104181	contig08934	7e-61	99	232	length=1486 numreads=52
Unigene1316_Taxus	GQ04107_I22.1	172	419	165	412	214/248		2e-56	86	222	clone=GQ04107_I22 cluster=GQ04107_I22 status=complete gb=BT119590	GQ04107_I22.1	172	419	165	412	214/248		4e-57	86	222	clone=GQ04107_I22 cluster=GQ04107_I22 status=complete gb=BT119590						FXAT9O003DANXE	5e-57	97	220
Unigene1317_Taxus	GQ03212_O03.1	552	598	500	454	42/47		7e-06	89	54	clone=GQ03212_O03 cluster=GQ03212_O03 status=complete gb=BT109837	GQ03212_O03.1	552	598	500	454	42/47		1e-06	89	54	clone=GQ03212_O03 cluster=GQ03212_O03 status=complete gb=BT109837	contig26170	3e-07	89	56	length=908 numreads=13
Unigene1318_Taxus	GQ03113_L20.1	215	549	358	692	275/335		1e-46	82	188	clone=GQ03113_L20 cluster=GQ03207_K02 status=complete	GQ03207_K02.1	215	549	632	966	274/335		6e-45	81	180	clone=GQ03207_K02 cluster=GQ03207_K02 status=complete gb=BT109364	contig01752	0	96	906	length=1001 numreads=22	contig02660	1e-159	94	559	length=1117 numreads=17
Unigene1319_Taxus	GQ03118_O08.1	1	75	1418	1492	66/75		3e-13	88	77.8	clone=GQ03118_O08 cluster=GQ03118_O08 status=complete gb=BT108249	GQ03118_O08.1	1	75	1418	1492	66/75		6e-14	88	77.8	clone=GQ03118_O08 cluster=GQ03118_O08 status=complete gb=BT108249	contig09798	1e-146	97	517	length=2134 numreads=81
Unigene1320_Taxus
Unigene1321_Taxus												GQ03217_O17.1	37	65	627	655	28/29		1e-05	96	50.1	clone=GQ03217_O17 cluster=GQ03217_O17 status=complete gb=BT110196	contig20919	4e-51	100	200	length=292 numreads=2
Unigene1322_Taxus
Unigene1323_Taxus
Unigene1324_Taxus	GQ0206_P18.1	612	859	1069	1316	210/248		8e-47	84	190	clone=GQ0206_P18 cluster=GQ0206_P18 status=53	GQ0206_P18.1	612	859	1069	1316	210/248		2e-47	84	190	clone=GQ0206_P18 cluster=GQ0206_P18 status=53	contig17838	0	96	1572	length=943 numreads=30
Unigene1325_Taxus
Unigene1326_Taxus																							contig09565	1e-104	95	377	length=1372 numreads=26
Unigene1327_Taxus	GQ03113_N18.1	2693	3633	1	944	804/944	5' read(F)	0	85	757	clone=GQ03113_N18 cluster=GQ03113_N18 status=complete gb=BT107881	GQ03113_N18.1	2693	3633	1	944	804/944	5' read(F)	0	85	757	clone=GQ03113_N18 cluster=GQ03113_N18 status=complete gb=BT107881	contig08157	0	99	3493	length=1848 numreads=36	FXAT9O003C19C9	0	99	1027
Unigene1328_Taxus																							contig33042	2e-51	100	200	length=1315 numreads=68
Unigene1329_Taxus																							contig28380	3e-44	97	176	length=299 numreads=5
Unigene1330_Taxus
Unigene1331_Taxus
Unigene1332_Taxus																							contig34822	0	95	938	length=825 numreads=41
Unigene1333_Taxus																							contig05109	1e-100	93	363	length=524 numreads=4
Unigene1334_Taxus
Unigene1335_Taxus	WS0078_D21.1	301	502	315	117	168/202		4e-28	83	127	clone=WS0078_D21 cluster=GQ03202_P06 status=complete	GQ03202_P06.2	301	502	1570	1372	168/202		7e-29	83	127	clone=GQ03202_P06 cluster=GQ03202_P06 status=complete gb=BT108950	contig12592	0	98	950	length=1606 numreads=31	contig03604	7e-23	82	105	length=344 numreads=4
Unigene1336_Taxus	WS03217_H23.1	861	1453	258	850	521/593		1e-171	87	605	clone=WS03217_H23 cluster=GQ04102_D05 status=3	GQ04102_D05.1	861	1453	812	1404	521/593		1e-172	87	605	clone=GQ04102_D05 cluster=GQ04102_D05 status=complete gb=BT119167	contig17524	0	98	3227	length=1695 numreads=55	contig02265	0	98	1449	length=760 numreads=7
Unigene1337_Taxus	GQ0255_P04.1	39	642	1321	720	491/604		9e-79	81	295	clone=GQ0255_P04 cluster=GQ03011_H12 status=complete	GQ03011_H12.2	39	642	2978	2377	490/604		4e-77	81	287	clone=GQ03011_H12 cluster=GQ03011_H12 status=complete gb=BT106827	contig09577	4e-15	85	81.8	length=4239 numreads=119
Unigene1338_Taxus
Unigene1339_Taxus
Unigene1340_Taxus	GQ03107_H11.1	201	290	574	485	81/90		2e-22	90	107	clone=GQ03107_H11 cluster=GQ03007_M20 status=complete	GQ03007_M20.2	215	290	1185	1110	70/76		5e-22	92	103	clone=GQ03007_M20 cluster=GQ03007_M20 status=complete gb=BT106678	contig28013	2e-55	94	214	length=767 numreads=10
Unigene1341_Taxus	WS0038_O13.1	183	282	405	504	84/100		8e-11	84	71.9	clone=WS0038_O13 cluster=GQ03709_A14 status=complete
Unigene1342_Taxus	WS0054_O23.1	379	550	64	238	146/175		7e-24	83	113	clone=WS0054_O23 cluster=GQ03236_N13 status=3	GQ03236_N13.1	379	550	210	384	145/175		3e-22	82	105	clone=GQ03236_N13 cluster=GQ03236_N13 status=complete gb=BT111383	contig04832	1e-117	98	420	length=535 numreads=15	FXAT9O003DNNLH	1e-12	95	71.9
Unigene1343_Taxus
Unigene1344_Taxus
Unigene1345_Taxus																							contig17769	1e-46	98	184	length=1244 numreads=15
Unigene1346_Taxus
Unigene1347_Taxus	WS03217_A04.1	136	225	123	212	76/90		4e-10	84	67.9	clone=WS03217_A04 cluster=GQ03231_C15 status=3	GQ03231_C15.1	136	225	578	667	76/90		7e-11	84	67.9	clone=GQ03231_C15 cluster=GQ03231_C15 status=complete gb=BT111009	contig03843	0	97	690	length=1181 numreads=35	FXAT9O003CWJW3	1e-154	96	541
Unigene1348_Taxus	GQ04113_O13.1	623	905	225	507	236/283		3e-46	83	188	clone=GQ04113_O13 cluster=GQ03123_J10 status=complete	GQ03123_J10.1	623	905	237	519	236/283		5e-47	83	188	clone=GQ03123_J10 cluster=GQ03123_J10 status=complete gb=BT108563	contig03004	0	97	1590	length=1130 numreads=65	contig02862	0	99	829	length=445 numreads=3
Unigene1349_Taxus																							contig31320	1e-127	98	454	length=249 numreads=3
Unigene1350_Taxus																							contig23677	0	99	785	length=1079 numreads=19	FXAT9O003CZOPF	0	98	745
Unigene1351_Taxus	GQ01306_I03.1	13	196	467	284	153/185		2e-19	82	97.6	clone=GQ01306_I03 cluster=GQ01311_M07 status=5	GQ01302_K06.3	13	148	486	351	114/136		1e-19	83	95.6	clone=GQ01302_K06 cluster=GQ01302_K06 status=complete gb=BT101370	contig29360	3e-23	84	107	length=459 numreads=25
Unigene1352_Taxus
Unigene1353_Taxus												GQ03504_H23.1	8	48	200	160	37/41		7e-06	90	50.1	clone=GQ03504_H23 cluster=GQ03504_H23 status=complete gb=BT113919						contig05179	1e-81	97	299	length=431 numreads=3
Unigene1354_Taxus																												FXAT9O003DFH3V	1e-19	96	93.7
Unigene1355_Taxus																							contig04592	8e-13	86	73.8	length=1888 numreads=17	contig00605	9e-29	96	125	length=1491 numreads=14
Unigene1356_Taxus
Unigene1357_Taxus																							contig29415	1e-66	89	252	length=393 numreads=25	FXAT9O003C6NPK	1e-26	86	117
Unigene1358_Taxus
Unigene1359_Taxus
Unigene1360_Taxus	GQ02804_L16.4	589	1419	586	1416	717/831		0	86	743	clone=GQ02804_L16 cluster=GQ02804_L16 status=complete gb=BT103964	GQ02804_L16.4	589	1419	586	1416	717/831		0	86	743	clone=GQ02804_L16 cluster=GQ02804_L16 status=complete gb=BT103964	contig02828	0	99	1913	length=1513 numreads=30	FXAT9O003DKA0E	0	99	694
Unigene1361_Taxus	GQ0044_O09.1	731	1111	381	1	310/381	5' read(R)	2e-47	81	192	clone=GQ0044_O09 cluster=GQ03808_P21 status=5	GQ03808_P21.1	561	629	95	27	61/69		3e-12	88	73.8	clone=GQ03808_P21 cluster=GQ03808_P21 status=complete gb=BT116901
Unigene1362_Taxus	WS00728_G09.1	574	749	32	204	147/176		3e-24	83	115	clone=WS00728_G09 cluster=GQ03412_J05 status=3	GQ03412_J05.1	574	749	80	252	147/176		6e-25	83	115	clone=GQ03412_J05 cluster=GQ03412_J05 status=complete gb=BT113533						FXAT9O003DFLS5	0	98	932
Unigene1363_Taxus																							contig08527	0	97	1687	length=1129 numreads=41
Unigene1364_Taxus																							contig01604	7e-42	97	168	length=1442 numreads=60
Unigene1365_Taxus																												FXAT9O003DGDWE	1e-167	97	583
Unigene1366_Taxus												GQ02813_A11.1	223	344	1018	897	99/122		2e-08	81	60	clone=GQ02813_A11 cluster=GQ02813_A11 status=complete gb=BT104646	contig10300	0	98	890	length=1036 numreads=15	contig06719	1e-154	98	541	length=384 numreads=2
Unigene1367_Taxus																							contig03438	1e-27	93	121	length=387 numreads=12	FXAT9O003DIGE4	1e-37	100	153
Unigene1368_Taxus	GQ02825_O14.1	391	686	334	39	251/296		1e-58	84	230	clone=GQ02825_O14 cluster=GQ02825_O14 status=complete gb=BT105661	GQ02825_O14.1	391	686	334	39	251/296		2e-59	84	230	clone=GQ02825_O14 cluster=GQ02825_O14 status=complete gb=BT105661	contig15855	0	98	2863	length=1607 numreads=58	FXAT9O003C0292	0	99	916
Unigene1369_Taxus																							contig08064	9e-54	99	208	length=722 numreads=22
Unigene1370_Taxus																							contig24850	1e-07	93	56	length=136 numreads=15
Unigene1371_Taxus	GQ04107_J06.1	546	649	1305	1202	89/104		4e-16	85	87.7	clone=GQ04107_J06 cluster=GQ04107_J06 status=complete gb=BT119593	GQ04107_J06.1	546	649	1305	1202	89/104		7e-17	85	87.7	clone=GQ04107_J06 cluster=GQ04107_J06 status=complete gb=BT119593	contig01039	0	96	894	length=1475 numreads=84	contig01578	0	96	686	length=1340 numreads=19
Unigene1372_Taxus	WS00722_L07.1	781	926	160	15	132/146		2e-43	90	178	clone=WS00722_L07 cluster=GQ02829_D06 status=3	GQ02829_D06.1	781	878	623	526	90/98		8e-30	91	131	clone=GQ02829_D06 cluster=GQ02829_D06 status=complete gb=BT105835	contig12152	1e-123	98	442	length=235 numreads=5	FXAT9O003C35HD	0	99	726
Unigene1373_Taxus																							contig15639	0	81	751	length=1865 numreads=84	contig05280	1e-76	80	285	length=723 numreads=4
Unigene1374_Taxus	WS00830_H17.1	286	388	306	204	88/103		2e-15	85	85.7	clone=WS00830_H17 cluster=WS00830_H17 status=3	WS00830_H17.1	286	388	306	204	88/103		4e-16	85	85.7	clone=WS00830_H17 cluster=WS00830_H17 status=3
Unigene1375_Taxus
Unigene1376_Taxus	GQ03915_L11.2	1	197	927	1123	175/197		2e-55	88	216	clone=GQ03915_L11 cluster=GQ03915_L11 status=complete gb=BT117882	GQ03915_L11.2	1	197	927	1123	175/197		4e-56	88	216	clone=GQ03915_L11 cluster=GQ03915_L11 status=complete gb=BT117882	contig26959	1e-49	99	194	length=504 numreads=6
Unigene1377_Taxus
Unigene1378_Taxus
Unigene1379_Taxus
Unigene1380_Taxus
Unigene1381_Taxus	GQ02820_D24.2	192	1487	1301	12	1149/1296		0	88	1413	clone=GQ02820_D24 cluster=GQ02820_D24 status=complete gb=BT105258	GQ02820_D24.2	192	1487	1301	12	1149/1296		0	88	1413	clone=GQ02820_D24 cluster=GQ02820_D24 status=complete gb=BT105258	contig16870	0	98	2866	length=1552 numreads=36	FXAT9O003C4EGG	0	99	660
Unigene1382_Taxus																												contig02312	6e-86	94	313	length=1657 numreads=16
Unigene1383_Taxus
Unigene1384_Taxus	GQ03236_P13.1	761	1578	4	824	686/821	5' read(F)	1e-156	83	553	clone=GQ03236_P13 cluster=GQ03236_P13 status=complete gb=BT111391	GQ03236_P13.1	761	1578	4	824	686/821	5' read(F)	1e-156	83	553	clone=GQ03236_P13 cluster=GQ03236_P13 status=complete gb=BT111391	contig18503	0	99	1390	length=1052 numreads=18	FXAT9O003DJ2W0	8e-32	97	137
Unigene1385_Taxus																												contig06815	6e-86	94	313	length=370 numreads=2
Unigene1386_Taxus																							contig33715	9e-20	88	95.6	length=205 numreads=20	FXAT9O003CYUC5	3e-14	88	75.8
Unigene1387_Taxus	GQ02903_C17.2	1	807	661	1467	716/807		0	88	878	clone=GQ02903_C17 cluster=GQ02903_C17 status=complete gb=BT106109	GQ02903_C17.2	1	807	661	1467	716/807		0	88	878	clone=GQ02903_C17 cluster=GQ02903_C17 status=complete gb=BT106109	contig15340	0	99	2204	length=1525 numreads=51	contig03921	0	98	644	length=347 numreads=3
Unigene1388_Taxus
Unigene1389_Taxus																							contig16595	3e-38	96	157	length=893 numreads=9
Unigene1390_Taxus	GQ03815_J02.1	11	93	238	320	71/83		5e-11	85	69.9	clone=GQ03815_J02 cluster=GQ03201_G22 status=complete	GQ03201_G22.1	11	93	565	647	70/83		2e-09	84	61.9	clone=GQ03201_G22 cluster=GQ03201_G22 status=complete gb=BT108818	contig14099	2e-15	85	81.8	length=597 numreads=7	FXAT9O003C5EVK	2e-25	100	113
Unigene1391_Taxus
Unigene1392_Taxus	GQ03716_E04.1	478	659	139	320	153/182		9e-29	84	131	clone=GQ03716_E04 cluster=GQ03519_E06 status=complete	GQ03519_E06.1	478	659	1472	1653	152/182		4e-27	83	123	clone=GQ03519_E06 cluster=GQ03519_E06 status=complete gb=BT114680	contig11426	0	97	1074	length=596 numreads=6
Unigene1393_Taxus
Unigene1394_Taxus																							contig09015	3e-57	91	222	length=869 numreads=19	FXAT9O003CXPGD	1e-170	93	595
Unigene1395_Taxus																							contig07047	1e-160	96	561	length=1782 numreads=48
Unigene1396_Taxus
Unigene1397_Taxus	GQ02817_F12.1	1397	1622	383	158	189/226		5e-36	83	155	clone=GQ02817_F12 cluster=GQ02815_M10 status=complete	GQ02815_M10.1	1397	1622	383	158	189/226		1e-36	83	155	clone=GQ02815_M10 cluster=GQ02815_M10 status=complete gb=BT104842	contig32701	0	98	1201	length=1255 numreads=20
Unigene1398_Taxus																							contig04408	0	96	963	length=3430 numreads=171	FXAT9O003DGIYC	1e-177	97	617
Unigene1399_Taxus	GQ02819_F01.1	406	1377	974	3	833/973	5' read(R)	0	85	803	clone=GQ02819_F01 cluster=GQ02819_F01 status=complete gb=BT105165	GQ02819_F01.1	406	1377	974	3	833/973	5' read(R)	0	85	803	clone=GQ02819_F01 cluster=GQ02819_F01 status=complete gb=BT105165	contig14260	0	98	3247	length=1702 numreads=29	FXAT9O003C8H3B	0	99	930
Unigene1400_Taxus
Unigene1401_Taxus																							contig01262	2e-91	95	333	length=1079 numreads=36
Unigene1402_Taxus																							contig23889	1e-155	98	549	length=482 numreads=6	contig07294	1e-167	96	587	length=341 numreads=3
Unigene1403_Taxus
Unigene1404_Taxus	WS00741_C04.1	320	435	236	121	101/116		6e-23	87	111	clone=WS00741_C04 cluster=GQ02905_N16 status=3												contig33212	0	99	642	length=969 numreads=12	FXAT9O003C1GAW	1e-125	96	448
Unigene1405_Taxus	WS03223_A02.1	376	461	86	3	74/86	5' read(R)	1e-10	86	69.9	clone=WS03223_A02 cluster=WS03223_A02 status=3	WS03223_A02.1	376	461	86	3	74/86	5' read(R)	2e-11	86	69.9	clone=WS03223_A02 cluster=WS03223_A02 status=3	contig24179	0	99	1443	length=1028 numreads=24	FXAT9O003DKC7R	1e-124	100	442
Unigene1406_Taxus	WS03223_I20.1	172	506	97	431	296/335		2e-96	88	355	clone=WS03223_I20 cluster=GQ03409_I04 status=complete	GQ03409_I04.1	172	506	294	628	295/335		7e-95	88	347	clone=GQ03409_I04 cluster=GQ03409_I04 status=complete gb=BT113463	contig04703	0	98	1633	length=868 numreads=36	contig00951	0	98	1316	length=717 numreads=5
Unigene1407_Taxus	GQ03902_A05.1	824	1150	910	1239	277/330		1e-58	83	230	clone=GQ03902_A05 cluster=GQ03902_A05 status=complete gb=BT117514	GQ03902_A05.1	824	1150	910	1239	277/330		2e-59	83	230	clone=GQ03902_A05 cluster=GQ03902_A05 status=complete gb=BT117514	contig33864	0	99	2682	length=1524 numreads=59	contig01977	0	98	872	length=480 numreads=4
Unigene1408_Taxus	GQ0168_H03.1	160	296	548	412	111/137		7e-10	81	65.9	clone=GQ0168_H03 cluster=GQ03519_C08 status=5	GQ03519_C08.4	2	96	755	661	79/95		2e-09	83	61.9	clone=GQ03519_C08 cluster=GQ03519_C08 status=complete gb=BT114673	contig18006	1e-109	99	392	length=1477 numreads=20	contig02160	1e-114	100	408	length=1523 numreads=15
Unigene1409_Taxus	GQ03111_D11.1	1341	2386	10	1055	891/1046	5' read(F)	0	85	844	clone=GQ03111_D11 cluster=GQ03111_D11 status=complete gb=BT107666	GQ03111_D11.1	1341	2386	10	1055	891/1046	5' read(F)	0	85	844	clone=GQ03111_D11 cluster=GQ03111_D11 status=complete gb=BT107666	contig24697	0	99	1578	length=815 numreads=22	FXAT9O003DHUBX	0	98	783
Unigene1410_Taxus
Unigene1411_Taxus																							contig16430	3e-19	93	93.7	length=365 numreads=13	contig01588	3e-20	95	95.6	length=236 numreads=2
Unigene1412_Taxus
Unigene1413_Taxus																							contig12279	1e-19	85	95.6	length=322 numreads=20	contig00639	1e-105	100	377	length=2244 numreads=15
Unigene1414_Taxus	WS02625_N01.1	14	111	293	390	84/98		4e-15	85	83.8	clone=WS02625_N01 cluster=GQ04009_I18 status=complete	GQ04009_I18.1	14	111	694	791	83/98		2e-13	84	75.8	clone=GQ04009_I18 cluster=GQ04009_I18 status=complete gb=BT118721	contig12098	1e-17	82	89.7	length=677 numreads=21	contig01247	9e-16	82	81.8	length=1125 numreads=23
Unigene1415_Taxus	GQ04012_G24.1	6	334	329	657	292/329		8e-98	88	359	clone=GQ04012_G24 cluster=GQ03227_E16 status=5	GQ03227_E16.1	6	334	418	746	292/329		1e-98	88	359	clone=GQ03227_E16 cluster=GQ03227_E16 status=complete gb=BT110742	contig12808	0	98	1364	length=1221 numreads=54	contig05885	1e-125	92	446	length=335 numreads=4
Unigene1416_Taxus
Unigene1417_Taxus																												FXAT9O003C3CHU	0	99	763
Unigene1418_Taxus																							contig16094	1e-118	95	424	length=390 numreads=3
Unigene1419_Taxus	GQ0195_F23.1	494	1016	1085	563	452/523		1e-132	86	474	clone=GQ0195_F23 cluster=GQ03313_I07 status=complete	GQ02814_B07.2	703	1012	1050	741	265/310		6e-68	85	258	clone=GQ02814_B07 cluster=GQ02814_B07 status=complete gb=BT104726	contig18688	0	100	1037	length=1879 numreads=34	FXAT9O003C3PZO	2e-74	94	278
Unigene1420_Taxus
Unigene1421_Taxus	GQ03119_I08.3	515	1539	1112	85	890/1028		0	86	940	clone=GQ03119_I08 cluster=GQ03119_I08 status=complete gb=BT108287	GQ03119_I08.3	515	1539	1112	85	890/1028		0	86	940	clone=GQ03119_I08 cluster=GQ03119_I08 status=complete gb=BT108287	contig20645	0	99	3136	length=1718 numreads=31	FXAT9O003C3VPP	0	99	930
Unigene1422_Taxus																												FXAT9O003CYRD3	5e-25	95	111
Unigene1423_Taxus
Unigene1424_Taxus																							contig13537	1e-18	92	91.7	length=875 numreads=45	FXAT9O003DJ75E	5e-28	95	121
Unigene1425_Taxus	GQ0073_F18.1	145	236	131	40	78/92		2e-11	84	71.9	clone=GQ0073_F18 cluster=GQ0073_F18 status=3	GQ0073_F18.1	145	236	131	40	78/92		3e-12	84	71.9	clone=GQ0073_F18 cluster=GQ0073_F18 status=3	contig16650	1e-166	99	583	length=1833 numreads=45
Unigene1426_Taxus
Unigene1427_Taxus																							contig06719	1e-130	96	464	length=2262 numreads=46
Unigene1428_Taxus																							contig03470	7e-42	100	168	length=2322 numreads=72	FXAT9O003C1HB1	3e-42	100	168
Unigene1429_Taxus																							contig31567	0	98	674	length=360 numreads=5	contig01515	1e-136	90	482	length=392 numreads=4
Unigene1430_Taxus																							contig36373	3e-52	93	204	length=177 numreads=10	contig05275	2e-11	85	67.9	length=247 numreads=4
Unigene1431_Taxus
Unigene1432_Taxus	GQ02808_G22.1	1642	2491	25	874	724/850		0	85	686	clone=GQ02808_G22 cluster=GQ02808_G22 status=complete gb=BT104273	GQ02808_G22.1	1642	2491	25	874	724/850		0	85	686	clone=GQ02808_G22 cluster=GQ02808_G22 status=complete gb=BT104273	contig04381	0	98	2853	length=2863 numreads=63
Unigene1433_Taxus																							contig08253	3e-13	95	73.8	length=1147 numreads=15
Unigene1434_Taxus	GQ03235_E18.1	1874	2069	265	70	172/196		7e-49	87	198	clone=GQ03235_E18 cluster=GQ03235_E18 status=complete gb=BT111273	GQ03235_E18.1	1874	2069	265	70	172/196		1e-49	87	198	clone=GQ03235_E18 cluster=GQ03235_E18 status=complete gb=BT111273						contig05404	0	98	872	length=465 numreads=5
Unigene1435_Taxus
Unigene1436_Taxus																							contig08377	1e-113	98	406	length=491 numreads=7	FXAT9O003CYMHK	1e-101	96	363
Unigene1437_Taxus																							contig14450	5e-25	89	113	length=1116 numreads=11
Unigene1438_Taxus	GQ02908_O05.1	1085	1147	10	72	55/63	5' read(F)	7e-08	87	61.9	clone=GQ02908_O05 cluster=GQ02908_O05 status=complete gb=BT106394	GQ02908_O05.1	1085	1147	10	72	55/63	5' read(F)	1e-08	87	61.9	clone=GQ02908_O05 cluster=GQ02908_O05 status=complete gb=BT106394	contig13451	1e-154	97	545	length=408 numreads=2	FXAT9O003DMH6G	0	99	793
Unigene1439_Taxus																							contig33154	5e-49	99	192	length=1138 numreads=26
Unigene1440_Taxus																							contig29761	0	98	714	length=380 numreads=2
Unigene1441_Taxus																							contig05198	0	98	882	length=791 numreads=15	contig05035	1e-160	99	563	length=1212 numreads=9
Unigene1442_Taxus
Unigene1443_Taxus
Unigene1444_Taxus																							contig05011	1e-43	100	174	length=949 numreads=9
Unigene1445_Taxus																							contig04553	0	97	761	length=551 numreads=56	contig01472	0	98	969	length=513 numreads=5
Unigene1446_Taxus																												FXAT9O003CXB3B	1e-150	97	529
Unigene1447_Taxus	GQ0068_I07.1	229	672	1	453	393/453	5' read(F)	1e-118	86	430	clone=GQ0068_I07 cluster=GQ0068_I07 status=complete gb=BT101132	GQ0068_I07.1	229	672	1	453	393/453	5' read(F)	1e-119	86	430	clone=GQ0068_I07 cluster=GQ0068_I07 status=complete gb=BT101132	contig24404	0	97	959	length=543 numreads=5
Unigene1448_Taxus																							contig04348	0	98	1090	length=594 numreads=13
Unigene1449_Taxus	GQ04004_O06.1	154	241	315	402	75/88		8e-12	85	71.9	clone=GQ04004_O06 cluster=GQ03610_P08 status=5	GQ03610_P08.1	154	241	988	1075	75/88		2e-12	85	71.9	clone=GQ03610_P08 cluster=GQ03610_P08 status=complete gb=BT115182	contig09361	5e-43	96	172	length=1703 numreads=114
Unigene1450_Taxus
Unigene1451_Taxus	WS03227_C04.1	3051	3180	275	404	117/130		1e-35	90	155	clone=WS03227_C04 cluster=GQ03303_I04 status=3	GQ03303_I04.2	3051	3180	1318	1447	117/130		2e-36	90	155	clone=GQ03303_I04 cluster=GQ03303_I04 status=complete gb=BT111777	contig23387	1e-170	96	601	length=350 numreads=3	FXAT9O003CY5BN	8e-58	98	224
Unigene1452_Taxus	GQ04004_J23.1	1187	1472	310	25	233/286		2e-33	81	147	clone=GQ04004_J23 cluster=GQ03326_B18 status=complete	GQ03326_B18.1	1187	1514	1068	741	263/328		1e-30	80	135	clone=GQ03326_B18 cluster=GQ03326_B18 status=complete gb=BT113129	contig19305	4e-61	84	236	length=1294 numreads=14	contig03439	0	98	995	length=537 numreads=6
Unigene1453_Taxus	GQ03223_P17.1	190	297	314	421	92/108		3e-16	85	87.7	clone=GQ03223_P17 cluster=GQ03223_P17 status=complete gb=BT110590	GQ03223_P17.1	190	297	314	421	92/108		5e-17	85	87.7	clone=GQ03223_P17 cluster=GQ03223_P17 status=complete gb=BT110590	contig07257	1e-75	83	281	length=635 numreads=5	contig00813	7e-66	81	248	length=1313 numreads=18
Unigene1454_Taxus																							contig12227	0	98	1388	length=1112 numreads=41	FXAT9O003DOBRS	1e-134	95	476
Unigene1455_Taxus	WS00754_B05.1	1	275	385	113	220/275		3e-24	80	113	clone=WS00754_B05 cluster=GQ03324_N07 status=3												contig01301	1e-96	90	351	length=1391 numreads=43	FXAT9O003C9YU1	1e-35	96	147
Unigene1456_Taxus																							contig06565	9e-50	90	196	length=935 numreads=31	FXAT9O003DIYXL	9e-26	86	115
Unigene1457_Taxus												GQ03813_N19.1	12	73	308	369	53/62		4e-06	85	52	clone=GQ03813_N19 cluster=GQ03813_N19 status=complete gb=BT117154	contig18154	6e-48	84	190	length=524 numreads=6	FXAT9O003C6AOZ	9e-17	89	85.7
Unigene1458_Taxus
Unigene1459_Taxus																							contig25477	1e-108	93	391	length=467 numreads=18	contig01515	1e-166	99	581	length=392 numreads=4
Unigene1460_Taxus	GQ03404_H24.1	1046	1158	45	157	100/113		5e-26	88	121	clone=GQ03404_H24 cluster=GQ03404_H24 status=complete gb=BT113307	GQ03404_H24.1	1046	1158	45	157	100/113		1e-26	88	121	clone=GQ03404_H24 cluster=GQ03404_H24 status=complete gb=BT113307	contig15893	0	99	1017	length=1321 numreads=12	FXAT9O003CUPVX	4e-51	93	200
Unigene1461_Taxus
Unigene1462_Taxus																							contig23573	6e-12	84	69.9	length=360 numreads=4	FXAT9O003CZWHE	1e-13	84	73.8
Unigene1463_Taxus	WS00836_E19.1	701	886	369	184	157/186		2e-31	84	139	clone=WS00836_E19 cluster=GQ04004_F08 status=complete	GQ04004_F08.1	701	886	897	712	157/186		3e-32	84	139	clone=GQ04004_F08 cluster=GQ04004_F08 status=complete gb=BT118262	contig05082	0	99	1568	length=1517 numreads=58	contig02672	0	98	658	length=382 numreads=2
Unigene1464_Taxus	WS0346_O15.1	1	116	194	79	97/116		5e-14	83	79.8	clone=WS0346_O15 cluster=GQ03212_I17 status=complete	GQ03212_I17.1	1	116	298	183	97/116		9e-15	83	79.8	clone=GQ03212_I17 cluster=GQ03212_I17 status=complete gb=BT109798	contig34065	1e-105	98	379	length=212 numreads=9
Unigene1465_Taxus	GQ02805_D03.1	45	373	71	393	286/329		5e-84	86	313	clone=GQ02805_D03 cluster=GQ03222_E23 status=5	GQ03222_E23.1	45	373	679	1001	285/329		2e-82	86	305	clone=GQ03222_E23 cluster=GQ03222_E23 status=complete gb=BT110471	contig11845	0	98	1471	length=1663 numreads=49	contig02774	0	99	969	length=513 numreads=4
Unigene1466_Taxus	GQ03719_I19.2	430	520	1533	1623	80/91		5e-18	87	93.7	clone=GQ03719_I19 cluster=GQ03719_I19 status=complete gb=BT116486	GQ03719_I19.2	430	520	1533	1623	80/91		1e-18	87	93.7	clone=GQ03719_I19 cluster=GQ03719_I19 status=complete gb=BT116486	contig02038	0	99	821	length=480 numreads=119	contig05657	1e-142	97	502	length=452 numreads=3
Unigene1467_Taxus	GQ03219_H18.1	145	238	1033	1126	80/94		2e-12	85	75.8	clone=GQ03219_H18 cluster=GQ03219_H18 status=complete gb=BT110298	GQ03219_H18.1	145	238	1033	1126	80/94		4e-13	85	75.8	clone=GQ03219_H18 cluster=GQ03219_H18 status=complete gb=BT110298	contig33955	1e-122	98	438	length=800 numreads=41
Unigene1468_Taxus	WS02633_E19.1	278	455	344	521	156/178		2e-43	87	178	clone=WS02633_E19 cluster=GQ03201_N01 status=complete	GQ03201_N01.1	278	455	414	591	156/178		3e-44	87	178	clone=GQ03201_N01 cluster=GQ03201_N01 status=complete gb=BT108855	contig11335	0	99	1019	length=1878 numreads=28
Unigene1469_Taxus	GQ02905_O12.2	377	682	1038	736	247/306		3e-30	80	135	clone=GQ02905_O12 cluster=GQ02905_O12 status=complete gb=BT106249	GQ02905_O12.2	377	682	1038	736	247/306		6e-31	80	135	clone=GQ02905_O12 cluster=GQ02905_O12 status=complete gb=BT106249	contig08753	0	97	1576	length=1917 numreads=185
Unigene1470_Taxus																							contig05978	0	97	876	length=634 numreads=8	FXAT9O003C5WIV	1e-121	99	434
Unigene1471_Taxus																							contig02665	7e-39	100	159	length=1073 numreads=41	contig00642	2e-06	100	50.1	length=460 numreads=4
Unigene1472_Taxus																							contig05975	5e-44	97	176	length=280 numreads=2	FXAT9O003C5AME	2e-50	100	196
Unigene1473_Taxus																							contig31096	2e-14	86	77.8	length=342 numreads=2
Unigene1474_Taxus	GQ0196_A20.1	111	571	28	488	393/461		1e-102	85	375	clone=GQ0196_A20 cluster=GQ0196_A20 status=complete gb=BT102531	GQ0196_A20.1	111	571	28	488	393/461		1e-103	85	375	clone=GQ0196_A20 cluster=GQ0196_A20 status=complete gb=BT102531	contig21600	0	97	1294	length=1144 numreads=32	FXAT9O003DJPSY	1e-173	97	605
Unigene1475_Taxus
Unigene1476_Taxus																							contig15582	5e-52	100	202	length=1067 numreads=16
Unigene1477_Taxus	GQ03619_J03.1	12	84	157	229	62/73		4e-07	84	58	clone=GQ03619_J03 cluster=GQ03319_K16 status=complete	GQ03319_K16.1	12	84	268	340	62/73		7e-08	84	58	clone=GQ03319_K16 cluster=GQ03319_K16 status=complete gb=BT112698	contig00122	0	99	728	length=2375 numreads=50	FXAT9O003DQG1A	1e-46	91	184
Unigene1478_Taxus																							contig13512	1e-160	92	563	length=1895 numreads=35
Unigene1479_Taxus	GQ0132_D17.1	505	615	394	284	93/111		6e-13	83	77.8	clone=GQ0132_D17 cluster=GQ0132_D17 status=complete gb=BT101873	GQ0132_D17.1	505	615	394	284	93/111		1e-13	83	77.8	clone=GQ0132_D17 cluster=GQ0132_D17 status=complete gb=BT101873	contig16476	7e-98	82	357	length=1251 numreads=52
Unigene1480_Taxus																							contig01436	1e-162	94	569	length=514 numreads=133
Unigene1481_Taxus																							contig34521	1e-50	82	198	length=846 numreads=20	contig05275	1e-11	85	67.9	length=247 numreads=4
Unigene1482_Taxus
Unigene1483_Taxus																												FXAT9O003DKLFA	0	94	630
Unigene1484_Taxus																							contig21882	0	97	767	length=1174 numreads=16	contig06517	5e-18	90	89.7	length=435 numreads=4
Unigene1485_Taxus
Unigene1486_Taxus																							contig22667	5e-52	100	202	length=1228 numreads=14
Unigene1487_Taxus																							contig05855	3e-57	90	220	length=423 numreads=23
Unigene1488_Taxus
Unigene1489_Taxus	GQ00610_L20.1	207	242	529	494	35/36		2e-09	97	63.9	clone=GQ00610_L20 cluster=GQ02814_A18 status=53	GQ03504_I16.2	197	243	1288	1242	42/47		4e-07	89	54	clone=GQ03504_I16 cluster=GQ03504_I16 status=complete gb=BT113921	contig35406	2e-27	87	121	length=240 numreads=4	contig05693	9e-27	88	117	length=386 numreads=2
Unigene1490_Taxus	GQ03233_A24.1	820	950	74	204	119/131		3e-39	90	165	clone=GQ03233_A24 cluster=GQ03233_A24 status=complete gb=BT111131	GQ03233_A24.1	820	950	74	204	119/131		6e-40	90	165	clone=GQ03233_A24 cluster=GQ03233_A24 status=complete gb=BT111131	contig14916	2e-17	83	89.7	length=457 numreads=2
Unigene1491_Taxus																							contig06442	1e-164	99	575	length=708 numreads=29	FXAT9O003DHEPK	1e-108	93	389
Unigene1492_Taxus																							contig10124	1e-09	86	61.9	length=970 numreads=17
Unigene1493_Taxus	GQ03607_B16.1	238	278	387	347	38/41		2e-07	92	58	clone=GQ03607_B16 cluster=GQ03227_H19 status=complete	GQ03227_H19.1	238	278	1629	1589	38/41		3e-08	92	58	clone=GQ03227_H19 cluster=GQ03227_H19 status=complete gb=BT110760	contig01559	1e-106	95	383	length=1182 numreads=15
Unigene1494_Taxus																							contig18648	6e-59	100	226	length=1891 numreads=18	FXAT9O003DNDF0	1e-54	99	210
Unigene1495_Taxus
Unigene1496_Taxus	GQ03504_K18.1	397	826	828	399	366/430		2e-93	85	345	clone=GQ03504_K18 cluster=GQ03610_G12 status=5	GQ03610_G12.1	397	826	658	229	365/430		9e-92	84	337	clone=GQ03610_G12 cluster=GQ03610_G12 status=complete gb=BT115156	contig09766	0	99	946	length=711 numreads=36	FXAT9O003DMQVX	0	97	874
Unigene1497_Taxus	GQ02904_J13.1	1031	1515	544	60	390/485		4e-52	80	208	clone=GQ02904_J13 cluster=GQ02904_J13 status=complete gb=BT106186	GQ02904_J13.1	1031	1515	544	60	390/485		8e-53	80	208	clone=GQ02904_J13 cluster=GQ02904_J13 status=complete gb=BT106186	contig10386	0	97	1513	length=876 numreads=15	FXAT9O003DOHY2	1e-103	96	375
Unigene1498_Taxus																							contig15636	5e-49	98	192	length=1231 numreads=13
Unigene1499_Taxus	WS03216_J08.1	68	114	295	249	44/47		1e-10	93	69.9	clone=WS03216_J08 cluster=WS03216_J08 status=complete	WS03216_J08.1	68	114	295	249	44/47		2e-11	93	69.9	clone=WS03216_J08 cluster=WS03216_J08 status=complete	contig26868	1e-141	88	500	length=742 numreads=32	contig04564	1e-114	86	408	length=643 numreads=4
Unigene1500_Taxus	GQ03717_J16.1	2485	3168	1897	2580	570/684		1e-125	83	452	clone=GQ03717_J16 cluster=GQ03717_J16 status=53	GQ03717_J16.1	2485	3168	1897	2580	570/684		1e-126	83	452	clone=GQ03717_J16 cluster=GQ03717_J16 status=53	contig11775	0	99	3019	length=1819 numreads=37	FXAT9O003DG9WJ	0	99	815
Unigene1501_Taxus																												FXAT9O003DLS7M	2e-64	99	242
Unigene1502_Taxus	GQ03418_I09.1	201	393	902	1094	163/193		1e-33	84	145	clone=GQ03418_I09 cluster=GQ03418_I09 status=complete gb=BT113723	GQ03418_I09.1	201	393	902	1094	163/193		2e-34	84	145	clone=GQ03418_I09 cluster=GQ03418_I09 status=complete gb=BT113723	contig12119	2e-15	83	81.8	length=1533 numreads=103	contig06668	8e-10	88	61.9	length=200 numreads=2
Unigene1503_Taxus																							contig09576	1e-18	91	93.7	length=1546 numreads=40
Unigene1504_Taxus
Unigene1505_Taxus	GQ03813_H19.1	1726	1765	63	102	37/40		6e-06	92	56	clone=GQ03813_H19 cluster=GQ02904_M22 status=5	GQ02904_M22.2	1726	1765	921	960	37/40		1e-06	92	56	clone=GQ02904_M22 cluster=GQ02904_M22 status=complete gb=BT106195	contig09576	1e-118	86	426	length=1546 numreads=40
Unigene1506_Taxus	WS00822_M13.1	1	269	70	338	217/269		1e-26	80	121	clone=WS00822_M13 cluster=GQ03617_J13 status=3	GQ03617_J13.2	1	116	865	980	101/116		2e-24	87	111	clone=GQ03617_J13 cluster=GQ03617_J13 status=complete gb=BT115475	contig16688	1e-150	99	529	length=1055 numreads=22	contig04865	1e-129	96	458	length=646 numreads=6
Unigene1507_Taxus
Unigene1508_Taxus	GQ03804_D07.1	807	923	678	562	97/117		2e-11	82	73.8	clone=GQ03804_D07 cluster=GQ03804_D07 status=complete gb=BT116665	GQ03804_D07.1	807	923	678	562	97/117		4e-12	82	73.8	clone=GQ03804_D07 cluster=GQ03804_D07 status=complete gb=BT116665	contig21449	0	99	2068	length=1587 numreads=67
Unigene1509_Taxus
Unigene1510_Taxus
Unigene1511_Taxus	GQ03201_J20.1	2188	2585	5	402	356/399	5' read(F)	1e-120	89	434	clone=GQ03201_J20 cluster=GQ03123_B09 status=complete	GQ01301_K11.2	2179	2585	493	899	351/407		4e-99	86	363	clone=GQ01301_K11 cluster=GQ01301_K11 status=complete gb=BT101321	contig11628	0	99	1885	length=998 numreads=19	contig07076	0	96	670	length=385 numreads=5
Unigene1512_Taxus	GQ03201_P24.1	288	321	443	410	33/34		5e-08	97	60	clone=GQ03201_P24 cluster=GQ03201_P24 status=complete gb=BT108872	GQ03201_P24.1	288	321	443	410	33/34		9e-09	97	60	clone=GQ03201_P24 cluster=GQ03201_P24 status=complete gb=BT108872	contig15684	1e-28	98	125	length=955 numreads=6
Unigene1513_Taxus	WS00730_I20.1	655	714	492	551	53/60		6e-09	88	63.9	clone=WS00730_I20 cluster=GQ03811_M11 status=3	GQ03811_M11.1	655	714	233	292	52/60		3e-07	86	56	clone=GQ03811_M11 cluster=GQ03811_M11 status=complete gb=BT117048	contig11896	0	95	1116	length=1415 numreads=19	contig02860	0	88	789	length=2362 numreads=49
Unigene1514_Taxus																							contig33400	3e-55	97	214	length=121 numreads=3	contig02765	0	93	747	length=1944 numreads=16
Unigene1515_Taxus																							contig33678	0	98	1130	length=738 numreads=41	FXAT9O003C28XM	0	97	728
Unigene1516_Taxus	GQ04106_O18.1	130	1034	1008	104	778/905		0	85	787	clone=GQ04106_O18 cluster=GQ04106_O18 status=complete gb=BT119541	GQ04106_O18.1	130	1034	1008	104	778/905		0	85	787	clone=GQ04106_O18 cluster=GQ04106_O18 status=complete gb=BT119541	contig03319	0	99	1941	length=1109 numreads=24	FXAT9O003C7EGC	0	96	678
Unigene1517_Taxus																							contig18647	1e-165	100	581	length=972 numreads=7	FXAT9O003DC2RP	2e-36	97	151
Unigene1518_Taxus	GQ0063_A06.1	10	125	148	263	99/116		1e-18	85	95.6	clone=GQ0063_A06 cluster=GQ0063_A06 status=complete gb=BT100997	GQ0063_A06.1	10	125	148	263	99/116		2e-19	85	95.6	clone=GQ0063_A06 cluster=GQ0063_A06 status=complete gb=BT100997	contig05926	0	95	747	length=564 numreads=33	contig05267	7e-26	86	115	length=290 numreads=3
Unigene1519_Taxus												GQ03205_D18.1	1250	1296	908	953	43/47		3e-06	91	54	clone=GQ03205_D18 cluster=GQ03205_D18 status=complete gb=BT109154
Unigene1520_Taxus	GQ03001_K06.1	13	190	415	590	150/178		6e-28	84	125	clone=GQ03001_K06 cluster=GQ0047_A13 status=complete	GQ0047_A13.1	13	190	750	925	149/178		3e-26	83	117	clone=GQ0047_A13 cluster=GQ0047_A13 status=complete gb=BT100843	contig16175	1e-62	88	238	length=826 numreads=24	FXAT9O003DJM27	3e-51	87	198
Unigene1521_Taxus	GQ03602_I15.1	288	747	1232	1691	411/460		1e-147	89	523	clone=GQ03602_I15 cluster=GQ03602_I15 status=complete gb=BT114804	GQ03602_I15.1	288	747	1232	1691	411/460		1e-148	89	523	clone=GQ03602_I15 cluster=GQ03602_I15 status=complete gb=BT114804	contig22366	0	99	892	length=1286 numreads=18
Unigene1522_Taxus																							contig08223	3e-32	97	137	length=1205 numreads=16	contig04255	9e-80	100	293	length=443 numreads=2
Unigene1523_Taxus																												contig00867	1e-101	95	365	length=862 numreads=6
Unigene1524_Taxus																							contig32345	1e-170	98	597	length=595 numreads=16
Unigene1525_Taxus	WS00727_G10.1	7	72	27	92	56/66		9e-06	84	52	clone=WS00727_G10 cluster=GQ02811_I12 status=complete	WS0056_F11.1	7	72	210	275	56/66		2e-06	84	52	clone=WS0056_F11 cluster=WS0056_F11 status=complete	contig06308	3e-23	98	107	length=457 numreads=13
Unigene1526_Taxus
Unigene1527_Taxus																							contig24579	1e-153	98	539	length=592 numreads=150
Unigene1528_Taxus
Unigene1529_Taxus	WS0053_K03.1	369	540	227	401	148/175		1e-28	84	129	clone=WS0053_K03 cluster=GQ03213_B21 status=3	GQ03213_B21.3	369	540	1310	1484	147/175		5e-27	84	121	clone=GQ03213_B21 cluster=GQ03213_B21 status=complete gb=BT109863	contig06935	0	98	908	length=1485 numreads=77
Unigene1530_Taxus																							contig09516	0	99	1403	length=856 numreads=24	contig01993	1e-177	82	618	length=1343 numreads=20
Unigene1531_Taxus
Unigene1532_Taxus	GQ03226_C19.1	138	225	16	103	81/88		4e-26	92	119	clone=GQ03226_C19 cluster=GQ03226_C19 status=complete gb=BT110687	GQ03226_C19.1	138	225	16	103	81/88		7e-27	92	119	clone=GQ03226_C19 cluster=GQ03226_C19 status=complete gb=BT110687	contig19415	1e-55	99	214	length=1604 numreads=29
Unigene1533_Taxus	GQ03118_J17.1	15	446	837	409	352/432		1e-55	81	218	clone=GQ03118_J17 cluster=GQ04007_O11 status=5	GQ04007_O11.1	15	383	1180	812	303/369		3e-53	82	208	clone=GQ04007_O11 cluster=GQ04007_O11 status=complete gb=BT118577	contig21985	0	98	1078	length=1205 numreads=16
Unigene1534_Taxus												GQ04007_L06.1	460	518	754	812	51/59		2e-06	86	54	clone=GQ04007_L06 cluster=GQ04007_L06 status=complete gb=BT118560						contig00867	0	90	652	length=862 numreads=6
Unigene1535_Taxus	WS0076_N18.1	300	390	272	182	78/91		3e-13	85	77.8	clone=WS0076_N18 cluster=GQ0264_B10 status=complete	GQ0264_B10.1	300	390	149	59	78/91		5e-14	85	77.8	clone=GQ0264_B10 cluster=GQ0264_B10 status=complete gb=BT103643	contig07081	1e-109	91	392	length=1823 numreads=48	FXAT9O003C1J98	7e-72	88	268
Unigene1536_Taxus	GQ0046_I01.2	181	224	1104	1147	40/44		5e-07	90	56	clone=GQ0046_I01 cluster=GQ0046_I01 status=complete gb=BT100825	GQ0046_I01.2	181	224	1104	1147	40/44		9e-08	90	56	clone=GQ0046_I01 cluster=GQ0046_I01 status=complete gb=BT100825	contig16640	5e-52	100	202	length=1366 numreads=16
Unigene1537_Taxus	GQ03229_L23.1	248	791	290	833	448/544		3e-85	82	317	clone=GQ03229_L23 cluster=GQ03324_K24 status=5	GQ03324_K24.1	248	791	380	923	446/544		4e-81	81	301	clone=GQ03324_K24 cluster=GQ03324_K24 status=complete gb=BT113025	contig01807	0	99	1653	length=951 numreads=53	contig04879	0	98	993	length=532 numreads=8
Unigene1538_Taxus																							contig24710	1e-149	98	527	length=286 numreads=2
Unigene1539_Taxus																												FXAT9O003C0W5N	3e-30	91	129
Unigene1540_Taxus	GQ03314_G21.1	678	763	666	751	73/86		2e-09	84	67.9	clone=GQ03314_G21 cluster=GQ03314_G21 status=complete gb=BT112395	GQ03314_G21.1	678	763	666	751	73/86		3e-10	84	67.9	clone=GQ03314_G21 cluster=GQ03314_G21 status=complete gb=BT112395	contig21750	4e-06	89	54	length=1457 numreads=21	FXAT9O003C34CG	1e-150	96	531
Unigene1541_Taxus																							contig06868	2e-60	92	230	length=578 numreads=18
Unigene1542_Taxus
Unigene1543_Taxus
Unigene1544_Taxus
Unigene1545_Taxus	GQ0165_I21.1	679	1205	1	527	427/527	5' read(F)	7e-65	81	252	clone=GQ0165_I21 cluster=GQ03412_J13 status=53	GQ03814_C16.1	2157	2191	299	333	35/35		1e-10	100	69.9	clone=GQ03814_C16 cluster=GQ03814_C16 status=complete gb=BT117167	contig29036	0	96	728	length=416 numreads=5	FXAT9O003DDLFI	0	97	805
Unigene1546_Taxus	GQ03320_G13.1	94	396	4	306	248/303	5' read(F)	5e-39	81	165	clone=GQ03320_G13 cluster=GQ03320_G13 status=complete gb=BT112751	GQ03320_G13.1	94	396	4	306	248/303	5' read(F)	9e-40	81	165	clone=GQ03320_G13 cluster=GQ03320_G13 status=complete gb=BT112751	contig33050	0	99	2801	length=1651 numreads=69
Unigene1547_Taxus																							contig00229	8e-14	90	75.8	length=579 numreads=5
Unigene1548_Taxus																							contig14359	0	98	753	length=430 numreads=107
Unigene1549_Taxus
Unigene1550_Taxus																							contig08598	1e-99	95	361	length=634 numreads=12	contig05144	1e-16	83	83.8	length=249 numreads=2
Unigene1551_Taxus	GQ02808_F04.3	106	372	1885	2154	225/270		1e-42	83	174	clone=GQ02808_F04 cluster=GQ02808_F04 status=complete gb=BT104257	GQ02808_F04.3	106	372	1885	2154	225/270		2e-43	83	174	clone=GQ02808_F04 cluster=GQ02808_F04 status=complete gb=BT104257	contig06967	1e-165	100	581	length=1110 numreads=19
Unigene1552_Taxus																							contig23217	1e-165	98	579	length=705 numreads=45
Unigene1553_Taxus
Unigene1554_Taxus																							contig16724	0	99	654	length=1102 numreads=64
Unigene1555_Taxus																							contig31099	3e-68	100	258	length=738 numreads=6	FXAT9O003C2IKR	7e-14	87	75.8
Unigene1556_Taxus	GQ0175_F20.1	17	128	180	292	94/113		7e-10	83	65.9	clone=GQ0175_F20 cluster=GQ0175_F20 status=3	GQ0175_F20.1	17	128	180	292	94/113		1e-10	83	65.9	clone=GQ0175_F20 cluster=GQ0175_F20 status=3	contig35092	5e-22	92	103	length=94 numreads=4	contig02578	2e-28	84	123	length=418 numreads=4
Unigene1557_Taxus
Unigene1558_Taxus	WS0349_C17.1	691	922	425	194	189/232		3e-25	81	119	clone=WS0349_C17 cluster=GQ0172_J12 status=3	GQ0172_J12.1	691	922	238	7	189/232	5' read(R)	5e-26	81	119	clone=GQ0172_J12 cluster=GQ0172_J12 status=3	contig00112	0	98	2563	length=1399 numreads=35	FXAT9O003C5UKI	0	94	658
Unigene1559_Taxus
Unigene1560_Taxus	GQ03605_N24.1	25	409	673	289	332/388		4e-85	85	317	clone=GQ03605_N24 cluster=GQ03605_N24 status=complete gb=BT114947	GQ03605_N24.1	25	409	673	289	332/388		7e-86	85	317	clone=GQ03605_N24 cluster=GQ03605_N24 status=complete gb=BT114947	contig12922	0	99	825	length=1695 numreads=20
Unigene1561_Taxus																							contig01078	6e-91	97	333	length=415 numreads=7
Unigene1562_Taxus
Unigene1563_Taxus																							contig30817	5e-52	100	202	length=360 numreads=4
Unigene1564_Taxus
Unigene1565_Taxus
Unigene1566_Taxus																							contig19996	8e-48	100	188	length=432 numreads=3
Unigene1567_Taxus																							contig06057	1e-44	97	178	length=1470 numreads=15
Unigene1568_Taxus																							contig18091	2e-51	100	200	length=1337 numreads=62
Unigene1569_Taxus	GQ04003_L04.1	537	659	242	364	111/123		1e-34	90	149	clone=GQ04003_L04 cluster=GQ02901_P17 status=5	GQ02901_P17.2	537	659	293	415	111/123		2e-35	90	149	clone=GQ02901_P17 cluster=GQ02901_P17 status=complete gb=BT106047	contig18787	7e-60	98	230	length=2422 numreads=35
Unigene1570_Taxus																							contig21042	1e-147	94	519	length=504 numreads=4
Unigene1571_Taxus	WS03222_G18.1	17	137	111	231	99/121		7e-10	81	65.9	clone=WS03222_G18 cluster=WS03222_G18 status=3	WS03222_G18.1	17	137	111	231	99/121		1e-10	81	65.9	clone=WS03222_G18 cluster=WS03222_G18 status=3						FXAT9O003CX9ZX	1e-81	98	299
Unigene1572_Taxus	GQ02013_H02.1	631	913	383	101	242/283		1e-60	85	236	clone=GQ02013_H02 cluster=GQ02013_H02 status=3	GQ02013_H02.1	631	913	383	101	242/283		3e-61	85	236	clone=GQ02013_H02 cluster=GQ02013_H02 status=3	contig06809	9e-24	82	111	length=2574 numreads=35
Unigene1573_Taxus																							contig26948	5e-52	100	202	length=428 numreads=4
Unigene1574_Taxus																												contig05089	9e-12	84	69.9	length=388 numreads=2
Unigene1575_Taxus	GQ01309_O14.2	1	98	386	483	89/98		2e-27	90	123	clone=GQ01309_O14 cluster=GQ03902_O03 status=5	GQ03902_O03.1	3	98	444	539	87/96		7e-27	90	119	clone=GQ03902_O03 cluster=GQ03902_O03 status=complete gb=BT117547
Unigene1576_Taxus
Unigene1577_Taxus	GQ01306_O10.3	690	1170	1134	654	409/481		1e-105	85	383	clone=GQ01306_O10 cluster=GQ01306_O10 status=complete gb=BT101540	GQ01306_O10.3	690	1170	1134	654	409/481		1e-105	85	383	clone=GQ01306_O10 cluster=GQ01306_O10 status=complete gb=BT101540	contig12015	0	97	1970	length=1265 numreads=27
Unigene1578_Taxus
Unigene1579_Taxus																												contig04568	1e-111	93	398	length=1358 numreads=10
Unigene1580_Taxus																							contig20510	2e-66	94	252	length=1216 numreads=29	FXAT9O003DQFDU	3e-20	82	97.6
Unigene1581_Taxus	GQ03117_O06.1	117	282	323	158	147/166		3e-43	88	178	clone=GQ03117_O06 cluster=GQ03117_O06 status=complete gb=BT108181	GQ03117_O06.1	117	282	323	158	147/166		5e-44	88	178	clone=GQ03117_O06 cluster=GQ03117_O06 status=complete gb=BT108181	contig02881	0	99	1719	length=1684 numreads=94
Unigene1582_Taxus	GQ0043_A12.1	187	1559	1421	37	1204/1388		0	86	1289	clone=GQ0043_A12 cluster=GQ0043_A12 status=complete gb=BT100767	GQ0043_A12.1	187	1559	1421	37	1204/1388		0	86	1289	clone=GQ0043_A12 cluster=GQ0043_A12 status=complete gb=BT100767	contig17281	0	98	3566	length=2018 numreads=27	FXAT9O003DMBWS	1e-171	95	601
Unigene1583_Taxus
Unigene1584_Taxus																							contig23134	1e-141	96	500	length=416 numreads=2	FXAT9O003C77N5	1e-143	95	504
Unigene1585_Taxus												GQ03911_J16.2	233	277	449	405	40/45		7e-06	88	50.1	clone=GQ03911_J16 cluster=GQ03911_J16 status=complete gb=BT117764	contig28475	2e-08	88	58	length=380 numreads=3
Unigene1586_Taxus	GQ03801_H16.1	344	424	885	805	72/81		2e-16	88	89.7	clone=GQ03801_H16 cluster=GQ03801_H16 status=complete gb=BT116531	GQ03801_H16.1	344	424	885	805	72/81		3e-17	88	89.7	clone=GQ03801_H16 cluster=GQ03801_H16 status=complete gb=BT116531						FXAT9O003C4RB8	2e-09	91	61.9
Unigene1587_Taxus	GQ04101_G01.1	153	510	942	1296	309/358		5e-86	86	319	clone=GQ04101_G01 cluster=GQ04101_G01 status=complete gb=BT119093	GQ04101_G01.1	153	510	942	1296	309/358		9e-87	86	319	clone=GQ04101_G01 cluster=GQ04101_G01 status=complete gb=BT119093	contig06094	0	99	684	length=1029 numreads=25	FXAT9O003C78BP	1e-92	97	337
Unigene1588_Taxus																												FXAT9O003C99NA	6e-17	86	85.7
Unigene1589_Taxus
Unigene1590_Taxus																							contig29073	3e-08	100	58	length=455 numreads=12
Unigene1591_Taxus																							contig00450	7e-55	94	212	length=1330 numreads=58	contig00553	2e-18	92	89.7	length=1238 numreads=32
Unigene1592_Taxus																							contig04420	5e-12	83	69.9	length=961 numreads=16
Unigene1593_Taxus																							contig15655	0	98	706	length=835 numreads=40	FXAT9O003CYIKR	9e-53	95	204
Unigene1594_Taxus	WS0328_F22.1	10	54	576	620	41/45		1e-07	91	58	clone=WS0328_F22 cluster=GQ04009_B13 status=3	GQ04009_B13.1	10	54	899	943	41/45		2e-08	91	58	clone=GQ04009_B13 cluster=GQ04009_B13 status=complete gb=BT118687	contig23897	4e-43	98	172	length=326 numreads=10	FXAT9O003C31T3	6e-06	90	48.1
Unigene1595_Taxus	GQ02829_P08.2	5	102	703	800	92/98		2e-34	93	147	clone=GQ02829_P08 cluster=GQ02829_P08 status=complete gb=BT105910	GQ02829_P08.2	5	102	703	800	92/98		3e-35	93	147	clone=GQ02829_P08 cluster=GQ02829_P08 status=complete gb=BT105910	contig21157	9e-54	97	208	length=1384 numreads=16
Unigene1596_Taxus																							contig18662	5e-43	97	172	length=1573 numreads=28	FXAT9O003DHTD8	1e-47	98	186
Unigene1597_Taxus
Unigene1598_Taxus
Unigene1599_Taxus	GQ03112_N08.1	357	466	645	536	97/110		2e-24	88	115	clone=GQ03112_N08 cluster=GQ02822_O24 status=complete	GQ02822_O24.1	385	466	1083	1002	75/82		9e-23	91	107	clone=GQ02822_O24 cluster=GQ02822_O24 status=complete gb=BT105471	contig20299	0	99	1148	length=1395 numreads=51	FXAT9O003DP3GC	1e-112	98	402
Unigene1600_Taxus	GQ03902_N14.1	533	576	382	425	43/44		2e-13	97	79.8	clone=GQ03902_N14 cluster=GQ03902_N14 status=complete gb=BT117544	GQ03902_N14.1	533	576	382	425	43/44		3e-14	97	79.8	clone=GQ03902_N14 cluster=GQ03902_N14 status=complete gb=BT117544	contig21031	0	99	1826	length=1118 numreads=58
Unigene1601_Taxus																							contig17657	0	97	729	length=502 numreads=4	FXAT9O003C86IS	0	97	672
Unigene1602_Taxus																							contig25498	1e-53	100	208	length=356 numreads=6	FXAT9O003C6P8J	6e-22	94	101
Unigene1603_Taxus	GQ04102_B13.1	1	86	115	30	74/86		7e-13	86	75.8	clone=GQ04102_B13 cluster=GQ03234_D24 status=complete	GQ03234_D24.1	1	86	519	434	74/86		1e-13	86	75.8	clone=GQ03234_D24 cluster=GQ03234_D24 status=complete gb=BT111201	contig17283	1e-141	96	500	length=396 numreads=5
Unigene1604_Taxus																							contig28712	8e-48	98	188	length=288 numreads=2
Unigene1605_Taxus																							contig07857	9e-51	100	198	length=2864 numreads=76
Unigene1606_Taxus																							contig20127	3e-11	89	67.9	length=736 numreads=8
Unigene1607_Taxus																							contig02915	1e-156	98	549	length=1636 numreads=23	contig04119	5e-93	95	339	length=321 numreads=2
Unigene1608_Taxus
Unigene1609_Taxus	GQ03617_H13.1	282	739	728	1185	399/458		1e-122	87	440	clone=GQ03617_H13 cluster=GQ03617_H13 status=complete gb=BT115472	GQ03617_H13.1	282	739	728	1185	399/458		1e-123	87	440	clone=GQ03617_H13 cluster=GQ03617_H13 status=complete gb=BT115472	contig06384	0	100	1027	length=846 numreads=11	FXAT9O003DQMNN	0	99	969
Unigene1610_Taxus	GQ03802_L02.1	825	973	1102	1250	129/149		7e-31	86	137	clone=GQ03802_L02 cluster=GQ03802_L02 status=complete gb=BT116590	GQ03802_L02.1	825	973	1102	1250	129/149		1e-31	86	137	clone=GQ03802_L02 cluster=GQ03802_L02 status=complete gb=BT116590	contig28982	1e-100	99	365	length=317 numreads=2	contig05947	8e-06	96	50.1	length=601 numreads=16
Unigene1611_Taxus	GQ03126_O10.1	118	176	210	152	51/59		2e-06	86	54	clone=GQ03126_O10 cluster=GQ03126_O10 status=complete gb=BT108776	GQ03126_O10.1	118	176	210	152	51/59		3e-07	86	54	clone=GQ03126_O10 cluster=GQ03126_O10 status=complete gb=BT108776	contig23572	3e-16	87	83.8	length=325 numreads=5	FXAT9O003DDCO8	7e-18	86	87.7
Unigene1612_Taxus	GQ03919_C06.2	77	209	7	135	117/133	5' read(F)	6e-31	87	135	clone=GQ03919_C06 cluster=GQ03919_C06 status=complete gb=BT117972	GQ03919_C06.2	77	209	7	135	117/133	5' read(F)	1e-31	87	135	clone=GQ03919_C06 cluster=GQ03919_C06 status=complete gb=BT117972	contig18081	7e-45	90	178	length=1404 numreads=42	FXAT9O003C3V9H	2e-06	96	50.1
Unigene1613_Taxus																							contig22776	0	98	1737	length=968 numreads=10
Unigene1614_Taxus	GQ03222_E22.1	785	1077	627	335	254/293		3e-71	86	272	clone=GQ03222_E22 cluster=GQ03222_E22 status=complete gb=BT110470	GQ03222_E22.1	785	1077	627	335	254/293		6e-72	86	272	clone=GQ03222_E22 cluster=GQ03222_E22 status=complete gb=BT110470						contig03559	0	98	1358	length=772 numreads=8
Unigene1615_Taxus																							contig16131	2e-29	89	129	length=876 numreads=6
Unigene1616_Taxus																							contig34601	4e-60	97	230	length=233 numreads=20
Unigene1617_Taxus	GQ03304_D05.1	519	834	38	353	254/317		2e-23	80	113	clone=GQ03304_D05 cluster=GQ04007_G03 status=complete												contig24029	0	99	1435	length=920 numreads=9	FXAT9O003DD5DD	0	98	710
Unigene1618_Taxus	GQ0032_M03.1	33	88	60	115	52/56		6e-14	92	79.8	clone=GQ0032_M03 cluster=GQ02807_B24 status=complete	GQ01301_O03.2	33	88	447	502	51/56		3e-12	91	71.9	clone=GQ01301_O03 cluster=GQ01301_O03 status=complete gb=BT101335	contig03627	2e-18	85	91.7	length=2153 numreads=33
Unigene1619_Taxus
Unigene1620_Taxus	GQ04111_N15.1	402	1305	1057	151	762/907		0	84	644	clone=GQ04111_N15 cluster=GQ04111_N15 status=complete gb=BT119891	GQ04111_N15.1	402	1305	1057	151	762/907		0	84	644	clone=GQ04111_N15 cluster=GQ04111_N15 status=complete gb=BT119891	contig16289	0	99	2452	length=1648 numreads=38	contig03741	2e-90	99	331	length=478 numreads=3
Unigene1621_Taxus																							contig08965	8e-92	92	335	length=779 numreads=64
Unigene1622_Taxus																							contig15780	1e-15	100	81.8	length=326 numreads=4
Unigene1623_Taxus	GQ03118_L23.1	186	952	766	3	663/767	5' read(R)	0	86	692	clone=GQ03118_L23 cluster=GQ03118_L23 status=complete gb=BT108237	GQ03118_L23.1	186	952	766	3	663/767	5' read(R)	0	86	692	clone=GQ03118_L23 cluster=GQ03118_L23 status=complete gb=BT108237	contig12837	0	98	1330	length=1206 numreads=12	contig02775	0	99	912	length=476 numreads=2
Unigene1624_Taxus																							contig08099	1e-115	99	414	length=1365 numreads=74
Unigene1625_Taxus																												FXAT9O003DFOG3	1e-06	89	52
Unigene1626_Taxus	WS00733_F13.1	5	102	181	84	86/98		7e-20	87	99.6	clone=WS00733_F13 cluster=WS00733_F13 status=3	WS00733_F13.1	5	102	181	84	86/98		1e-20	87	99.6	clone=WS00733_F13 cluster=WS00733_F13 status=3	contig20148	1e-165	99	581	length=515 numreads=7
Unigene1627_Taxus	GQ02014_B15.1	373	1273	1116	216	769/901		0	85	739	clone=GQ02014_B15 cluster=GQ03614_L11 status=complete	GQ03614_L11.1	373	1273	1186	285	768/902		0	85	718	clone=GQ03614_L11 cluster=GQ03614_L11 status=complete gb=BT115348	contig15583	0	98	3051	length=1720 numreads=63	FXAT9O003DJ055	0	98	955
Unigene1628_Taxus																							contig35674	4e-55	92	214	length=159 numreads=7
Unigene1629_Taxus	GQ04013_B06.1	1193	1281	120	32	76/89		4e-11	85	73.8	clone=GQ04013_B06 cluster=GQ04013_B06 status=complete gb=BT118993	GQ04013_B06.1	1193	1281	120	32	76/89		7e-12	85	73.8	clone=GQ04013_B06 cluster=GQ04013_B06 status=complete gb=BT118993	contig20947	0	98	1994	length=1057 numreads=10
Unigene1630_Taxus																												FXAT9O003CYVSL	2e-49	94	192
Unigene1631_Taxus
Unigene1632_Taxus
Unigene1633_Taxus	GQ03213_A06.1	187	1055	1152	285	752/869		0	86	787	clone=GQ03213_A06 cluster=GQ03005_C07 status=complete	GQ03005_C07.1	187	1055	965	98	751/869		0	86	779	clone=GQ03005_C07 cluster=GQ03005_C07 status=complete gb=BT106567	contig23339	0	99	1183	length=620 numreads=6	contig00149	0	99	1178	length=662 numreads=11
Unigene1634_Taxus	GQ03226_F20.1	3	106	120	17	92/104		9e-24	88	111	clone=GQ03226_F20 cluster=GQ03226_F20 status=complete gb=BT110691	GQ03226_F20.1	3	106	120	17	92/104		2e-24	88	111	clone=GQ03226_F20 cluster=GQ03226_F20 status=complete gb=BT110691
Unigene1635_Taxus	GQ04003_K20.1	349	460	200	311	99/112		1e-25	88	119	clone=GQ04003_K20 cluster=GQ03807_F04 status=5	GQ03807_F04.1	349	460	583	694	99/112		2e-26	88	119	clone=GQ03807_F04 cluster=GQ03807_F04 status=complete gb=BT116820	contig12884	0	98	868	length=1970 numreads=60	FXAT9O003C59O1	2e-67	94	254
Unigene1636_Taxus																							contig06963	8e-97	85	353	length=696 numreads=35	contig05275	8e-33	91	139	length=247 numreads=4
Unigene1637_Taxus
Unigene1638_Taxus	GQ04007_I17.1	459	608	677	528	133/150		1e-38	88	163	clone=GQ04007_I17 cluster=GQ04007_I17 status=complete gb=BT118542	GQ04007_I17.1	459	608	677	528	133/150		3e-39	88	163	clone=GQ04007_I17 cluster=GQ04007_I17 status=complete gb=BT118542	contig05684	0	97	1084	length=767 numreads=69	contig02684	0	98	1298	length=735 numreads=10
Unigene1639_Taxus																							contig21300	0	99	1778	length=932 numreads=21	contig04436	0	99	2593	length=1349 numreads=20
Unigene1640_Taxus	GQ02818_D24.1	121	566	774	329	380/446		4e-98	85	361	clone=GQ02818_D24 cluster=GQ02818_D24 status=complete gb=BT105069	GQ02818_D24.1	121	566	774	329	380/446		8e-99	85	361	clone=GQ02818_D24 cluster=GQ02818_D24 status=complete gb=BT105069	contig18556	0	99	2502	length=1286 numreads=13	contig02993	0	99	2555	length=1498 numreads=18
Unigene1641_Taxus	GQ03901_H10.1	366	1291	975	50	774/926		1e-179	83	630	clone=GQ03901_H10 cluster=GQ03101_O11 status=complete	GQ03101_O11.1	366	1246	921	41	736/881		1e-170	83	597	clone=GQ03101_O11 cluster=GQ03101_O11 status=complete gb=BT107025	contig13758	0	98	2625	length=1500 numreads=47	contig00523	0	98	2613	length=1407 numreads=15
Unigene1642_Taxus	WS00819_D19.1	318	440	155	33	106/123		7e-23	86	109	clone=WS00819_D19 cluster=GQ0174_N23 status=3	GQ0174_N23.1	318	423	111	6	93/106	5' read(R)	5e-23	87	107	clone=GQ0174_N23 cluster=GQ0174_N23 status=3	contig06390	1e-130	98	464	length=1516 numreads=35	FXAT9O003DDMIC	1e-116	98	416
Unigene1643_Taxus
Unigene1644_Taxus																												FXAT9O003DLP0D	1e-122	97	436
Unigene1645_Taxus
Unigene1646_Taxus	GQ03808_B09.1	109	609	769	269	415/501		2e-83	82	311	clone=GQ03808_B09 cluster=GQ02806_E10 status=5	GQ02806_E10.1	109	609	863	363	415/501		4e-84	82	311	clone=GQ02806_E10 cluster=GQ02806_E10 status=complete gb=BT104088	contig03469	0	99	1271	length=1347 numreads=10	contig06121	0	98	1158	length=884 numreads=8
Unigene1647_Taxus	GQ02811_F13.1	568	919	414	63	302/352		3e-80	85	301	clone=GQ02811_F13 cluster=GQ02811_F13 status=complete gb=BT104519	GQ02811_F13.1	568	919	414	63	302/352		6e-81	85	301	clone=GQ02811_F13 cluster=GQ02811_F13 status=complete gb=BT104519	contig02099	0	98	1624	length=932 numreads=36
Unigene1648_Taxus	GQ03210_G12.1	285	1431	1147	1	1012/1147	5' read(R)	0	88	1203	clone=GQ03210_G12 cluster=GQ03102_D14 status=complete	GQ03102_D14.2	879	1342	465	2	417/464	5' read(R)	1e-154	89	547	clone=GQ03102_D14 cluster=GQ03102_D14 status=complete gb=BT107055	contig13715	0	99	2864	length=1550 numreads=95	contig05305	0	99	884	length=473 numreads=5
Unigene1649_Taxus	GQ04112_M13.1	5	505	116	611	420/501		9e-96	83	353	clone=GQ04112_M13 cluster=GQ04112_M13 status=complete gb=BT119937	GQ04112_M13.1	5	505	116	611	420/501		2e-96	83	353	clone=GQ04112_M13 cluster=GQ04112_M13 status=complete gb=BT119937	contig14986	0	98	2418	length=1374 numreads=44	FXAT9O003C9TD9	0	99	904
Unigene1650_Taxus	WS0339_D19.1	618	1149	594	63	434/532		4e-73	81	278	clone=WS0339_D19 cluster=GQ03224_G13 status=3	GQ03224_G13.1	618	1149	790	259	434/532		7e-74	81	278	clone=GQ03224_G13 cluster=GQ03224_G13 status=complete gb=BT110613	contig03642	0	99	1388	length=1139 numreads=31	FXAT9O003C08XB	1e-165	99	581
Unigene1651_Taxus																							contig19148	1e-123	96	438	length=990 numreads=7
Unigene1652_Taxus																							contig04085	1e-179	97	626	length=348 numreads=9
Unigene1653_Taxus																												FXAT9O003CY3R1	8e-83	97	303
Unigene1654_Taxus	GQ0207_I24.1	537	591	669	723	48/55		5e-06	87	54	clone=GQ0207_I24 cluster=GQ0206_P18 status=53	GQ0206_P18.1	537	591	641	695	48/55		1e-06	87	54	clone=GQ0206_P18 cluster=GQ0206_P18 status=53
Unigene1655_Taxus																							contig00349	0	97	1160	length=1087 numreads=23	contig05824	0	97	932	length=515 numreads=4
Unigene1656_Taxus	GQ03719_E05.2	39	360	236	557	279/322		2e-79	86	297	clone=GQ03719_E05 cluster=GQ03719_E05 status=complete gb=BT116474	GQ03719_E05.2	39	360	236	557	279/322		3e-80	86	297	clone=GQ03719_E05 cluster=GQ03719_E05 status=complete gb=BT116474	contig12789	0	97	722	length=932 numreads=13	contig00938	3e-19	82	93.7	length=1250 numreads=14
Unigene1657_Taxus																							contig33862	1e-102	97	371	length=513 numreads=6
Unigene1658_Taxus																							contig27266	4e-70	97	264	length=381 numreads=12	contig05397	1e-45	91	180	length=751 numreads=6
Unigene1659_Taxus	WS02623_M16.1	345	704	500	141	306/360		9e-76	85	285	clone=WS02623_M16 cluster=GQ03810_K09 status=3	GQ03810_K09.3	345	704	3434	3075	306/360		2e-76	85	285	clone=GQ03810_K09 cluster=GQ03810_K09 status=complete gb=BT116976	contig19722	3e-13	84	75.8	length=1990 numreads=122
Unigene1660_Taxus																							contig31664	8e-42	100	168	length=422 numreads=5
Unigene1661_Taxus
Unigene1662_Taxus																							contig21050	1e-49	99	194	length=1263 numreads=13	FXAT9O003C5SA9	2e-21	96	99.6
Unigene1663_Taxus	GQ027124_E01.1	965	1100	567	432	116/136		8e-23	85	111	clone=GQ027124_E01 cluster=GQ027124_E01 status=5	GQ027124_E01.1	965	1100	567	432	116/136		1e-23	85	111	clone=GQ027124_E01 cluster=GQ027124_E01 status=5	contig21322	0	98	1356	length=727 numreads=8	contig03024	0	98	1053	length=565 numreads=4
Unigene1664_Taxus	WS00738_C18.1	223	259	108	73	36/37		1e-07	97	58	clone=WS00738_C18 cluster=GQ03519_L09 status=3	GQ03519_L09.1	223	259	485	450	36/37		3e-08	97	58	clone=GQ03519_L09 cluster=GQ03519_L09 status=complete gb=BT114710	contig23745	5e-40	96	163	length=475 numreads=2
Unigene1665_Taxus	GQ03108_F15.1	836	901	474	539	58/66		6e-10	87	67.9	clone=GQ03108_F15 cluster=GQ03108_F15 status=complete gb=BT107495	GQ03108_F15.1	836	901	474	539	58/66		1e-10	87	67.9	clone=GQ03108_F15 cluster=GQ03108_F15 status=complete gb=BT107495	contig11626	0	99	1431	length=1016 numreads=94	contig03523	0	99	940	length=820 numreads=7
Unigene1666_Taxus
Unigene1667_Taxus																							contig12106	2e-24	84	111	length=851 numreads=49	FXAT9O003CW5SZ	5e-32	92	135
Unigene1668_Taxus
Unigene1669_Taxus
Unigene1670_Taxus	WS02622_L13.1	480	1003	564	41	441/524		1e-104	84	381	clone=WS02622_L13 cluster=GQ03104_N16 status=3	GQ03104_N16.1	480	600	914	794	102/121		8e-17	84	89.7	clone=GQ03104_N16 cluster=GQ03104_N16 status=complete gb=BT107237	contig22337	0	98	2339	length=1260 numreads=33
Unigene1671_Taxus	GQ02821_J01.1	1662	2460	362	1160	649/799		1e-108	81	394	clone=GQ02821_J01 cluster=GQ02821_J01 status=complete gb=BT105369	GQ02821_J01.1	1662	2460	362	1160	649/799		1e-108	81	394	clone=GQ02821_J01 cluster=GQ02821_J01 status=complete gb=BT105369	contig07119	0	99	2696	length=1706 numreads=100	contig02757	0	98	864	length=484 numreads=3
Unigene1672_Taxus																							contig14632	1e-43	97	174	length=1211 numreads=43
Unigene1673_Taxus	GQ0176_F05.1	368	575	208	1	185/208	5' read(R)	7e-59	88	230	clone=GQ0176_F05 cluster=GQ0176_F05 status=3	GQ0176_F05.1	368	575	208	1	185/208	5' read(R)	1e-59	88	230	clone=GQ0176_F05 cluster=GQ0176_F05 status=3	contig09416	0	91	831	length=2248 numreads=81	contig07129	2e-77	90	287	length=312 numreads=2
Unigene1674_Taxus																							contig06645	1e-41	98	168	length=1277 numreads=32	contig05118	1e-36	98	151	length=477 numreads=4
Unigene1675_Taxus																												contig00209	0	98	825	length=2575 numreads=24
Unigene1676_Taxus	GQ03709_I01.1	529	759	769	542	195/231		2e-40	84	168	clone=GQ03709_I01 cluster=GQ03809_K15 status=5												contig22685	0	98	900	length=1755 numreads=34	FXAT9O003CX6HJ	0	97	662
Unigene1677_Taxus																							contig31008	3e-47	99	186	length=356 numreads=2
Unigene1678_Taxus	WS00720_N04.1	327	402	84	9	68/76	5' read(R)	7e-16	89	87.7	clone=WS00720_N04 cluster=WS00720_N04 status=3	WS00720_N04.1	327	402	84	9	68/76	5' read(R)	1e-16	89	87.7	clone=WS00720_N04 cluster=WS00720_N04 status=3	contig02539	0	98	2155	length=1151 numreads=30
Unigene1679_Taxus																							contig24376	2e-26	97	117	length=1006 numreads=9
Unigene1680_Taxus	GQ03119_D18.1	4	102	294	196	92/99		1e-32	92	141	clone=GQ03119_D18 cluster=GQ02802_A18 status=5	GQ03107_N05.3	4	101	2136	2039	81/98		6e-09	82	60	clone=GQ03107_N05 cluster=GQ03107_N05 status=complete gb=BT107462	contig11219	2e-51	100	200	length=1515 numreads=31	contig03811	4e-10	84	61.9	length=1080 numreads=8
Unigene1681_Taxus																							contig16652	4e-06	96	50.1	length=1730 numreads=60
Unigene1682_Taxus																							contig01908	9e-33	97	139	length=469 numreads=13	contig03492	1e-10	91	63.9	length=580 numreads=4
Unigene1683_Taxus																							contig17436	0	99	1144	length=955 numreads=7
Unigene1684_Taxus	GQ03810_J18.1	379	1327	946	1	816/951	5' read(R)	0	85	809	clone=GQ03810_J18 cluster=GQ03810_J18 status=complete gb=BT116974	GQ03810_J18.1	379	1327	946	1	816/951	5' read(R)	0	85	809	clone=GQ03810_J18 cluster=GQ03810_J18 status=complete gb=BT116974	contig21936	0	99	2613	length=1794 numreads=40	FXAT9O003C70KM	0	99	825
Unigene1685_Taxus
Unigene1686_Taxus	GQ02802_O04.1	147	257	198	88	99/111		1e-27	89	125	clone=GQ02802_O04 cluster=GQ02802_O04 status=complete gb=BT103839	GQ02802_O04.1	147	257	198	88	99/111		2e-28	89	125	clone=GQ02802_O04 cluster=GQ02802_O04 status=complete gb=BT103839	contig16747	8e-06	83	50.1	length=1942 numreads=57
Unigene1687_Taxus
Unigene1688_Taxus																							contig02268	1e-131	100	464	length=727 numreads=22
Unigene1689_Taxus	GQ03110_K04.1	374	587	267	54	178/214		2e-31	83	139	clone=GQ03110_K04 cluster=GQ03110_K04 status=complete gb=BT107626	GQ03110_K04.1	374	587	267	54	178/214		4e-32	83	139	clone=GQ03110_K04 cluster=GQ03110_K04 status=complete gb=BT107626	contig13693	0	99	1084	length=854 numreads=18	FXAT9O003DMFWV	0	98	783
Unigene1690_Taxus																							contig35946	6e-49	99	192	length=212 numreads=16
Unigene1691_Taxus																							contig02267	0	99	825	length=1511 numreads=47
Unigene1692_Taxus
Unigene1693_Taxus
Unigene1694_Taxus
Unigene1695_Taxus	GQ0255_O21.1	10	269	1183	924	215/260		2e-37	82	159	clone=GQ0255_O21 cluster=GQ03808_I16 status=53	WS0266_L21.1	10	89	81	2	67/80	5' read(R)	3e-07	83	56	clone=WS0266_L21 cluster=WS0266_L21 status=3	contig13905	0	98	749	length=1387 numreads=23
Unigene1696_Taxus																							contig25547	0	98	823	length=465 numreads=3
Unigene1697_Taxus																							contig16664	1e-112	100	402	length=509 numreads=17	contig07532	5e-62	91	234	length=303 numreads=7
Unigene1698_Taxus																							contig20726	9e-31	80	133	length=967 numreads=48	FXAT9O003DH1E3	2e-41	83	167
Unigene1699_Taxus																							contig12619	1e-149	99	527	length=1528 numreads=14
Unigene1700_Taxus
Unigene1701_Taxus	GQ04009_E02.1	1570	1728	432	589	136/159		5e-27	85	125	clone=GQ04009_E02 cluster=GQ04101_F16 status=5	GQ04101_F16.1	1570	1728	541	698	135/159		2e-25	84	117	clone=GQ04101_F16 cluster=GQ04101_F16 status=complete gb=BT119091	contig13263	0	98	1380	length=1551 numreads=19
Unigene1702_Taxus	WS00743_J10.1	1307	1378	714	643	61/72		4e-06	84	56	clone=WS00743_J10 cluster=WS00743_J10 status=complete	WS00743_J10.1	1307	1378	714	643	61/72		8e-07	84	56	clone=WS00743_J10 cluster=WS00743_J10 status=complete
Unigene1703_Taxus	GQ01308_H10.1	519	1044	281	806	456/529		1e-128	86	462	clone=GQ01308_H10 cluster=GQ0204_D17 status=5	GQ0204_D17.1	519	1044	285	810	455/529		1e-127	86	454	clone=GQ0204_D17 cluster=GQ0204_D17 status=complete gb=BT102970	contig13590	0	99	1518	length=1490 numreads=48	FXAT9O003DMU48	0	98	789
Unigene1704_Taxus	GQ03317_P14.1	1179	1460	592	873	237/282		3e-50	84	202	clone=GQ03317_P14 cluster=GQ03317_P14 status=complete gb=BT112586	GQ03317_P14.1	1179	1460	592	873	237/282		5e-51	84	202	clone=GQ03317_P14 cluster=GQ03317_P14 status=complete gb=BT112586	contig03398	0	98	1947	length=1781 numreads=44
Unigene1705_Taxus
Unigene1706_Taxus	GQ03301_P04.1	479	663	984	805	155/185		8e-30	83	133	clone=GQ03301_P04 cluster=GQ03615_O20 status=complete	GQ03615_O20.1	479	663	1077	898	154/185		3e-28	83	125	clone=GQ03615_O20 cluster=GQ03615_O20 status=complete gb=BT115407	contig17734	1e-159	95	561	length=1253 numreads=18
Unigene1707_Taxus
Unigene1708_Taxus
Unigene1709_Taxus
Unigene1710_Taxus	GQ04107_I05.1	594	1030	909	473	354/437		5e-52	81	208	clone=GQ04107_I05 cluster=GQ04107_I05 status=complete gb=BT119584	GQ04107_I05.1	594	1030	909	473	354/437		9e-53	81	208	clone=GQ04107_I05 cluster=GQ04107_I05 status=complete gb=BT119584	contig12388	0	99	1701	length=1244 numreads=22	FXAT9O003CXOPH	0	98	888
Unigene1711_Taxus	GQ03808_D17.1	180	275	340	245	81/96		1e-11	84	71.9	clone=GQ03808_D17 cluster=GQ03806_F17 status=5	GQ03806_F17.2	180	275	340	245	80/96		5e-10	83	63.9	clone=GQ03806_F17 cluster=GQ03806_F17 status=complete gb=BT116767	contig06346	2e-92	96	337	length=1380 numreads=96
Unigene1712_Taxus	GQ03712_H22.1	477	520	388	345	40/44		1e-06	90	56	clone=GQ03712_H22 cluster=GQ03712_H22 status=complete gb=BT116143	GQ03712_H22.1	477	520	388	345	40/44		2e-07	90	56	clone=GQ03712_H22 cluster=GQ03712_H22 status=complete gb=BT116143	contig28125	1e-120	97	430	length=860 numreads=14
Unigene1713_Taxus
Unigene1714_Taxus
Unigene1715_Taxus
Unigene1716_Taxus																							contig32694	1e-122	96	438	length=286 numreads=1	FXAT9O003DHDWF	4e-15	97	79.8
Unigene1717_Taxus
Unigene1718_Taxus
Unigene1719_Taxus
Unigene1720_Taxus																							contig02176	2e-11	82	67.9	length=1607 numreads=77
Unigene1721_Taxus	GQ03816_D13.1	22	89	314	247	60/68		1e-11	88	71.9	clone=GQ03816_D13 cluster=GQ03816_D13 status=complete gb=BT117265	GQ03816_D13.1	22	89	314	247	60/68		2e-12	88	71.9	clone=GQ03816_D13 cluster=GQ03816_D13 status=complete gb=BT117265	contig00768	2e-76	98	283	length=1214 numreads=61
Unigene1722_Taxus	WS00813_E10.1	158	230	141	69	68/73		9e-22	93	105	clone=WS00813_E10 cluster=GQ03107_E05 status=3	GQ03107_E05.1	158	230	1172	1100	68/73		2e-22	93	105	clone=GQ03107_E05 cluster=GQ03107_E05 status=complete gb=BT107417	contig20694	1e-44	97	178	length=1029 numreads=10
Unigene1723_Taxus
Unigene1724_Taxus
Unigene1725_Taxus																							contig11696	4e-07	100	54	length=1201 numreads=15	contig01572	1e-07	100	54	length=745 numreads=14
Unigene1726_Taxus																							contig06152	0	99	704	length=1647 numreads=40	FXAT9O003DG3IM	0	100	666
Unigene1727_Taxus
Unigene1728_Taxus
Unigene1729_Taxus
Unigene1730_Taxus																							contig06864	6e-96	98	349	length=1390 numreads=35
Unigene1731_Taxus																							contig19645	2e-41	93	167	length=443 numreads=8	FXAT9O003DCPB6	1e-06	93	50.1
Unigene1732_Taxus																							contig26554	1e-90	98	331	length=379 numreads=12
Unigene1733_Taxus	GQ02811_A07.4	1	557	554	1	486/557	5' read(R)	1e-151	87	537	clone=GQ02811_A07 cluster=GQ02811_A07 status=complete gb=BT104489	GQ02811_A07.4	1	557	554	1	486/557	5' read(R)	1e-152	87	537	clone=GQ02811_A07 cluster=GQ02811_A07 status=complete gb=BT104489	contig20424	0	97	668	length=759 numreads=9	contig02449	1e-109	98	394	length=463 numreads=2
Unigene1734_Taxus																							contig19517	1e-115	99	414	length=1625 numreads=38
Unigene1735_Taxus	GQ03123_M14.1	63	716	925	272	552/654		1e-136	84	488	clone=GQ03123_M14 cluster=GQ03123_M14 status=complete gb=BT108581	GQ03123_M14.1	63	716	925	272	552/654		1e-137	84	488	clone=GQ03123_M14 cluster=GQ03123_M14 status=complete gb=BT108581	contig19549	0	98	1584	length=970 numreads=13
Unigene1736_Taxus	WS02626_C12.1	3128	3195	96	29	60/68		1e-10	88	71.9	clone=WS02626_C12 cluster=GQ0182_A02 status=complete	GQ0182_A02.1	3128	3195	96	29	60/68		2e-11	88	71.9	clone=GQ0182_A02 cluster=GQ0182_A02 status=complete gb=BT102351	contig16555	0	99	2486	length=1290 numreads=13
Unigene1737_Taxus	WS02633_M16.1	496	546	292	342	47/51		1e-10	92	69.9	clone=WS02633_M16 cluster=WS02633_M16 status=3	WS02633_M16.1	496	546	292	342	47/51		2e-11	92	69.9	clone=WS02633_M16 cluster=WS02633_M16 status=3
Unigene1738_Taxus	GQ03324_I03.1	618	646	637	609	29/29		8e-07	100	58	clone=GQ03324_I03 cluster=GQ03324_I03 status=complete gb=BT113011	GQ03324_I03.1	618	646	637	609	29/29		1e-07	100	58	clone=GQ03324_I03 cluster=GQ03324_I03 status=complete gb=BT113011	contig34496	0	99	1292	length=1769 numreads=31	FXAT9O003DRQ03	2e-87	97	321
Unigene1739_Taxus	WS0268_G24.1	15	76	292	231	53/62		7e-06	85	52	clone=WS0268_G24 cluster=WS0268_G24 status=complete	WS0268_G24.1	15	76	292	231	53/62		1e-06	85	52	clone=WS0268_G24 cluster=WS0268_G24 status=complete	contig06994	3e-07	92	54	length=913 numreads=18
Unigene1740_Taxus																							contig13334	4e-50	99	196	length=1445 numreads=19
Unigene1741_Taxus
Unigene1742_Taxus	WS00744_E03.1	294	523	260	31	190/230		1e-31	82	139	clone=WS00744_E03 cluster=GQ04102_L23 status=complete	GQ04102_L23.1	294	523	1266	1037	190/230		2e-32	82	139	clone=GQ04102_L23 cluster=GQ04102_L23 status=complete gb=BT119211	contig33559	1e-126	99	450	length=271 numreads=9	contig01440	3e-13	82	73.8	length=983 numreads=7
Unigene1743_Taxus																							contig06344	3e-41	97	167	length=1546 numreads=56
Unigene1744_Taxus
Unigene1745_Taxus	GQ03803_J23.1	1	124	444	567	109/124		3e-28	87	127	clone=GQ03803_J23 cluster=GQ03803_J23 status=complete gb=BT116632	GQ03803_J23.1	1	124	444	567	109/124		5e-29	87	127	clone=GQ03803_J23 cluster=GQ03803_J23 status=complete gb=BT116632	contig24290	6e-96	98	349	length=320 numreads=7
Unigene1746_Taxus	GQ03121_J08.1	1	293	386	678	254/293		4e-71	86	272	clone=GQ03121_J08 cluster=GQ0072_A20 status=complete	GQ0207_A04.1	495	736	6	247	202/242	5' read(F)	5e-39	83	163	clone=GQ0207_A04 cluster=GQ0207_A04 status=complete gb=BT103126	contig25197	0	96	1927	length=1210 numreads=30	FXAT9O003C6OAI	0	99	698
Unigene1747_Taxus	GQ03121_J08.1	1	280	386	665	245/280		2e-73	87	278	clone=GQ03121_J08 cluster=GQ0072_A20 status=complete	GQ0207_A04.1	504	722	2	220	188/219	5' read(F)	3e-47	85	188	clone=GQ0207_A04 cluster=GQ0207_A04 status=complete gb=BT103126	contig25197	1e-144	96	511	length=1210 numreads=30	FXAT9O003C6OAI	1e-132	93	468
Unigene1748_Taxus	GQ02907_B23.1	634	930	1059	763	247/297		3e-47	83	192	clone=GQ02907_B23 cluster=GQ02907_B23 status=complete gb=BT106314	GQ02907_B23.1	634	930	1059	763	247/297		6e-48	83	192	clone=GQ02907_B23 cluster=GQ02907_B23 status=complete gb=BT106314	contig15558	0	98	1530	length=1285 numreads=48
Unigene1749_Taxus	GQ03519_L06.1	209	1038	324	1153	711/830		0	85	702	clone=GQ03519_L06 cluster=GQ03519_L06 status=complete gb=BT114709	GQ03519_L06.1	209	1038	324	1153	711/830		0	85	702	clone=GQ03519_L06 cluster=GQ03519_L06 status=complete gb=BT114709	contig18398	0	99	2095	length=1182 numreads=34	contig01400	0	86	664	length=1183 numreads=66
Unigene1750_Taxus
Unigene1751_Taxus	WS03410_N17.1	140	601	119	580	404/462		1e-127	87	456	clone=WS03410_N17 cluster=GQ03201_M19 status=3	GQ03201_M19.1	162	601	743	304	387/440		1e-126	87	452	clone=GQ03201_M19 cluster=GQ03201_M19 status=complete gb=BT108853	contig06640	0	99	841	length=445 numreads=9	FXAT9O003DLY8R	1e-148	97	523
Unigene1752_Taxus
Unigene1753_Taxus																							contig21587	2e-54	98	210	length=1254 numreads=25	FXAT9O003DO3HU	2e-06	91	50.1
Unigene1754_Taxus																							contig29614	7e-68	99	256	length=389 numreads=3
Unigene1755_Taxus
Unigene1756_Taxus	GQ0203_G12.1	266	347	253	172	70/82		7e-10	85	67.9	clone=GQ0203_G12 cluster=GQ0203_G12 status=complete gb=BT102926	GQ0203_G12.1	266	347	253	172	70/82		1e-10	85	67.9	clone=GQ0203_G12 cluster=GQ0203_G12 status=complete gb=BT102926	contig33861	0	99	1098	length=578 numreads=344	FXAT9O003DANL1	0	98	862
Unigene1757_Taxus																							contig14936	1e-152	97	537	length=1266 numreads=10
Unigene1758_Taxus	GQ03106_K03.1	1	210	623	420	178/210		2e-39	84	165	clone=GQ03106_K03 cluster=GQ03315_I11 status=53												contig09463	1e-117	97	420	length=1968 numreads=204	contig04684	1e-106	97	383	length=435 numreads=3
Unigene1759_Taxus																							contig13508	1e-114	98	410	length=983 numreads=26	FXAT9O003DBZ87	7e-07	88	52
Unigene1760_Taxus																							contig16145	1e-109	97	392	length=270 numreads=2	FXAT9O003C1GWV	8e-89	97	323
Unigene1761_Taxus																							contig23163	3e-70	97	264	length=1307 numreads=9
Unigene1762_Taxus																							contig07231	5e-58	99	222	length=449 numreads=5
Unigene1763_Taxus	WS0266_I21.1	163	236	253	180	65/74		1e-12	87	75.8	clone=WS0266_I21 cluster=GQ03213_H06 status=complete	GQ03213_H06.1	163	236	239	166	65/74		2e-13	87	75.8	clone=GQ03213_H06 cluster=GQ03213_H06 status=complete gb=BT109895	contig10875	1e-51	100	202	length=1415 numreads=36	FXAT9O003DI4R3	6e-45	98	178
Unigene1764_Taxus
Unigene1765_Taxus
Unigene1766_Taxus	GQ0198_B06.1	130	214	579	495	71/85		4e-07	83	58	clone=GQ0198_B06 cluster=GQ0198_B06 status=complete gb=BT102617	GQ0198_B06.1	130	214	579	495	71/85		7e-08	83	58	clone=GQ0198_B06 cluster=GQ0198_B06 status=complete gb=BT102617	contig16673	0	93	714	length=982 numreads=69
Unigene1767_Taxus	GQ03205_A10.3	1310	1720	1439	1849	360/411		1e-113	87	410	clone=GQ03205_A10 cluster=GQ03205_A10 status=53	GQ03205_A10.3	1310	1720	1439	1849	360/411		1e-113	87	410	clone=GQ03205_A10 cluster=GQ03205_A10 status=53	contig19944	0	98	2046	length=1965 numreads=26	FXAT9O003C0MVY	0	99	763
Unigene1768_Taxus	GQ02814_H01.1	681	813	157	25	111/133		2e-16	83	89.7	clone=GQ02814_H01 cluster=GQ03614_L23 status=complete	GQ03614_L23.1	681	797	576	460	98/117		7e-15	83	81.8	clone=GQ03614_L23 cluster=GQ03614_L23 status=complete gb=BT115350	contig20932	0	96	698	length=602 numreads=4	contig04203	0	97	1292	length=964 numreads=26
Unigene1769_Taxus	GQ03914_J09.1	164	226	500	562	56/63		3e-11	88	69.9	clone=GQ03914_J09 cluster=GQ02817_H21 status=5	GQ02817_H21.1	164	226	719	781	56/63		6e-12	88	69.9	clone=GQ02817_H21 cluster=GQ02817_H21 status=complete gb=BT104994	contig18409	5e-52	100	202	length=458 numreads=3
Unigene1770_Taxus																							contig25597	0	99	2081	length=1289 numreads=10	contig01981	0	99	977	length=513 numreads=5
Unigene1771_Taxus
Unigene1772_Taxus
Unigene1773_Taxus																							contig28228	1e-121	99	436	length=442 numreads=6
Unigene1774_Taxus																							contig02972	1e-52	100	204	length=378 numreads=8
Unigene1775_Taxus
Unigene1776_Taxus	GQ03323_H10.2	878	1065	318	131	157/188		9e-28	83	127	clone=GQ03323_H10 cluster=GQ03323_H10 status=complete gb=BT112967	GQ03323_H10.2	878	1065	318	131	157/188		2e-28	83	127	clone=GQ03323_H10 cluster=GQ03323_H10 status=complete gb=BT112967	contig06662	0	97	1905	length=1182 numreads=9
Unigene1777_Taxus																							contig04866	0	98	674	length=2145 numreads=76
Unigene1778_Taxus
Unigene1779_Taxus																							contig27140	1e-08	86	60	length=455 numreads=4
Unigene1780_Taxus	GQ03319_N17.1	479	673	472	278	166/195		8e-37	85	157	clone=GQ03319_N17 cluster=GQ02822_K15 status=5	GQ02822_K15.1	479	673	485	291	165/195		4e-35	84	149	clone=GQ02822_K15 cluster=GQ02822_K15 status=complete gb=BT105451	contig05221	0	98	1633	length=985 numreads=63	FXAT9O003DPXWL	0	98	922
Unigene1781_Taxus
Unigene1782_Taxus																							contig24725	1e-06	94	52	length=550 numreads=21	FXAT9O003C8O08	2e-52	100	202
Unigene1783_Taxus
Unigene1784_Taxus
Unigene1785_Taxus	GQ04101_A17.1	150	275	822	947	108/126		4e-22	85	107	clone=GQ04101_A17 cluster=GQ04101_A17 status=complete gb=BT119072	GQ04101_A17.1	150	275	822	947	108/126		7e-23	85	107	clone=GQ04101_A17 cluster=GQ04101_A17 status=complete gb=BT119072	contig10430	5e-11	82	67.9	length=1409 numreads=20	contig02765	8e-11	84	65.9	length=1944 numreads=16
Unigene1786_Taxus																							contig22299	2e-29	97	127	length=1511 numreads=46
Unigene1787_Taxus	GQ03309_J19.1	560	770	850	640	172/211		2e-22	81	109	clone=GQ03309_J19 cluster=GQ03309_J19 status=complete gb=BT112070	GQ03309_J19.1	560	770	850	640	172/211		3e-23	81	109	clone=GQ03309_J19 cluster=GQ03309_J19 status=complete gb=BT112070	contig07217	2e-42	100	172	length=1148 numreads=14
Unigene1788_Taxus
Unigene1789_Taxus																							contig03138	3e-47	98	186	length=464 numreads=26	contig07359	6e-12	93	67.9	length=931 numreads=7
Unigene1790_Taxus																							contig26040	1e-115	91	412	length=698 numreads=33	contig01243	1e-172	99	603	length=1149 numreads=16
Unigene1791_Taxus	WS00743_M14.1	355	534	374	195	149/180		8e-23	82	111	clone=WS00743_M14 cluster=GQ03717_N01 status=complete	GQ03717_N01.1	325	534	1108	899	171/210		2e-22	81	107	clone=GQ03717_N01 cluster=GQ03717_N01 status=complete gb=BT116387	contig07081	1e-164	87	579	length=1823 numreads=48	FXAT9O003C1J98	0	97	660
Unigene1792_Taxus
Unigene1793_Taxus	GQ03717_C10.1	238	338	677	577	85/101		3e-12	84	73.8	clone=GQ03717_C10 cluster=GQ04010_J08 status=5	GQ04010_J08.1	239	338	701	602	84/100		2e-12	84	71.9	clone=GQ04010_J08 cluster=GQ04010_J08 status=complete gb=BT118815	contig14105	1e-175	97	613	length=987 numreads=59	contig02198	1e-134	96	474	length=838 numreads=23
Unigene1794_Taxus	WS00830_J16.1	22	74	67	119	47/53		1e-07	88	58	clone=WS00830_J16 cluster=GQ02817_G08 status=complete	GQ02817_G08.1	22	74	1035	1087	47/53		2e-08	88	58	clone=GQ02817_G08 cluster=GQ02817_G08 status=complete gb=BT104988						FXAT9O003DF85K	1e-103	94	371
Unigene1795_Taxus	GQ02510_F04.1	148	494	238	590	287/353		3e-43	81	178	clone=GQ02510_F04 cluster=GQ03405_H01 status=3												contig07993	0	98	942	length=1267 numreads=14
Unigene1796_Taxus																							contig10458	1e-67	98	256	length=1702 numreads=20
Unigene1797_Taxus	GQ02904_D09.1	938	1714	777	1	683/777	5' read(R)	0	87	795	clone=GQ02904_D09 cluster=GQ02904_D09 status=complete gb=BT106163	GQ02904_D09.1	938	1714	777	1	683/777	5' read(R)	0	87	795	clone=GQ02904_D09 cluster=GQ02904_D09 status=complete gb=BT106163	contig00507	0	98	4732	length=2499 numreads=39	FXAT9O003DM6G5	2e-97	97	355
Unigene1798_Taxus																												FXAT9O003DQYGB	6e-98	95	355
Unigene1799_Taxus																							contig16634	0	99	1358	length=936 numreads=39
Unigene1800_Taxus	WS00834_M23.1	139	247	415	307	98/109		3e-28	89	129	clone=WS00834_M23 cluster=GQ03220_I23 status=complete	GQ03220_I23.1	139	247	1804	1696	98/109		5e-29	89	129	clone=GQ03220_I23 cluster=GQ03220_I23 status=complete gb=BT110356	contig12042	0	99	1382	length=929 numreads=14	contig03474	0	99	819	length=429 numreads=3
Unigene1801_Taxus	WS00839_H17.1	1135	1538	8	411	340/404	5' read(F)	1e-77	84	293	clone=WS00839_H17 cluster=GQ03707_F13 status=complete	GQ03707_F13.1	545	868	205	528	276/325		3e-62	84	240	clone=GQ03707_F13 cluster=GQ03707_F13 status=complete gb=BT115845	contig04295	0	99	3087	length=1910 numreads=54	FXAT9O003DKE9J	0	97	839
Unigene1802_Taxus
Unigene1803_Taxus
Unigene1804_Taxus	GQ02809_A23.1	587	897	98	405	258/311		2e-47	82	192	clone=GQ02809_A23 cluster=GQ02809_A23 status=complete gb=BT104330	GQ02809_A23.1	587	897	98	405	258/311		3e-48	82	192	clone=GQ02809_A23 cluster=GQ02809_A23 status=complete gb=BT104330	contig30505	1e-173	97	607	length=341 numreads=2	FXAT9O003DB2IG	1e-144	98	509
Unigene1805_Taxus																							contig01261	1e-147	98	519	length=996 numreads=57
Unigene1806_Taxus																							contig02057	1e-117	96	420	length=380 numreads=8
Unigene1807_Taxus	GQ03202_A05.1	7	105	280	182	89/99		1e-25	89	117	clone=GQ03202_A05 cluster=GQ03202_A05 status=complete gb=BT108875	GQ03202_A05.1	7	105	280	182	89/99		3e-26	89	117	clone=GQ03202_A05 cluster=GQ03202_A05 status=complete gb=BT108875	contig24678	6e-70	100	262	length=367 numreads=3
Unigene1808_Taxus	GQ03711_C12.1	39	280	671	912	209/242		3e-55	86	218	clone=GQ03711_C12 cluster=GQ03711_C12 status=complete gb=BT116053	GQ03711_C12.1	39	280	671	912	209/242		6e-56	86	218	clone=GQ03711_C12 cluster=GQ03711_C12 status=complete gb=BT116053	contig17750	0	93	1289	length=968 numreads=25	contig06228	2e-68	88	258	length=285 numreads=2
Unigene1809_Taxus
Unigene1810_Taxus	GQ04002_A16.1	464	657	439	632	162/194		8e-29	83	131	clone=GQ04002_A16 cluster=GQ04002_A16 status=5	GQ04002_A16.1	464	657	439	632	162/194		1e-29	83	131	clone=GQ04002_A16 cluster=GQ04002_A16 status=5	contig19013	0	97	1057	length=904 numreads=13
Unigene1811_Taxus																							contig01689	1e-52	97	204	length=559 numreads=4	FXAT9O003CXDYS	8e-15	85	77.8
Unigene1812_Taxus
Unigene1813_Taxus
Unigene1814_Taxus																							contig28230	2e-97	94	355	length=426 numreads=3
Unigene1815_Taxus	GQ02817_F12.1	369	419	1	51	47/51	5' read(F)	6e-11	92	69.9	clone=GQ02817_F12 cluster=GQ02815_M10 status=complete	GQ02815_M10.1	369	419	1	51	47/51	5' read(F)	1e-11	92	69.9	clone=GQ02815_M10 cluster=GQ02815_M10 status=complete gb=BT104842	contig06572	1e-148	97	523	length=1112 numreads=10
Unigene1816_Taxus
Unigene1817_Taxus																							contig26232	7e-58	98	222	length=715 numreads=15	FXAT9O003DL2SB	2e-49	99	192
Unigene1818_Taxus																							contig29009	5e-52	100	202	length=764 numreads=33
Unigene1819_Taxus
Unigene1820_Taxus	GQ02821_G04.1	126	486	100	460	302/361		2e-64	83	248	clone=GQ02821_G04 cluster=GQ04013_O11 status=complete	GQ04013_O11.1	126	486	120	480	300/361		2e-60	83	232	clone=GQ04013_O11 cluster=GQ04013_O11 status=complete gb=BT119057	contig28163	0	98	1229	length=887 numreads=20
Unigene1821_Taxus
Unigene1822_Taxus	GQ03320_A13.1	221	1458	331	1568	1080/1238		0	87	1201	clone=GQ03320_A13 cluster=GQ03320_A13 status=complete gb=BT112721	GQ03320_A13.1	221	1458	331	1568	1080/1238		0	87	1201	clone=GQ03320_A13 cluster=GQ03320_A13 status=complete gb=BT112721	contig05968	0	98	2803	length=1830 numreads=23	contig04572	0	99	789	length=420 numreads=3
Unigene1823_Taxus	GQ03811_M11.1	437	582	753	898	121/146		3e-17	82	91.7	clone=GQ03811_M11 cluster=GQ03811_M11 status=complete gb=BT117048	GQ03811_M11.1	437	582	753	898	121/146		5e-18	82	91.7	clone=GQ03811_M11 cluster=GQ03811_M11 status=complete gb=BT117048	contig02636	0	99	1090	length=1380 numreads=48	FXAT9O003DN44Y	4e-28	82	123
Unigene1824_Taxus																							contig34699	7e-27	100	119	length=366 numreads=9
Unigene1825_Taxus
Unigene1826_Taxus	GQ03229_A21.1	12	102	4	94	81/91	5' read(F)	9e-21	89	101	clone=GQ03229_A21 cluster=GQ03229_A21 status=complete gb=BT110866	GQ03229_A21.1	12	102	4	94	81/91	5' read(F)	2e-21	89	101	clone=GQ03229_A21 cluster=GQ03229_A21 status=complete gb=BT110866						contig02769	4e-41	97	165	length=476 numreads=2
Unigene1827_Taxus																							contig09000	6e-37	93	153	length=643 numreads=12	FXAT9O003DHKUS	2e-62	97	236
Unigene1828_Taxus	GQ04103_G16.1	772	848	770	694	71/77		2e-21	92	105	clone=GQ04103_G16 cluster=GQ02819_H24 status=5	GQ02819_H24.1	772	848	632	556	70/77		1e-19	90	97.6	clone=GQ02819_H24 cluster=GQ02819_H24 status=complete gb=BT105184	contig09600	0	98	773	length=1094 numreads=26
Unigene1829_Taxus	GQ03322_M06.1	1	102	223	122	89/102		3e-20	87	99.6	clone=GQ03322_M06 cluster=GQ03322_M06 status=complete gb=BT112919	GQ03322_M06.1	1	102	223	122	89/102		6e-21	87	99.6	clone=GQ03322_M06 cluster=GQ03322_M06 status=complete gb=BT112919	contig23934	6e-36	94	149	length=300 numreads=5
Unigene1830_Taxus
Unigene1831_Taxus																							contig27576	3e-42	96	170	length=575 numreads=4
Unigene1832_Taxus																												FXAT9O003DB6FF	5e-75	100	278
Unigene1833_Taxus																												FXAT9O003DKP8E	4e-50	100	194
Unigene1834_Taxus																							contig08198	2e-23	89	107	length=931 numreads=21
Unigene1835_Taxus																							contig02672	7e-39	96	159	length=1000 numreads=29	contig00154	2e-39	96	159	length=519 numreads=6
Unigene1836_Taxus
Unigene1837_Taxus
Unigene1838_Taxus
Unigene1839_Taxus
Unigene1840_Taxus	GQ03312_L12.1	231	737	164	656	439/507		1e-132	86	474	clone=GQ03312_L12 cluster=GQ02806_J04 status=complete	GQ02806_J04.1	231	737	670	1162	438/507		1e-130	86	466	clone=GQ02806_J04 cluster=GQ02806_J04 status=complete gb=BT104109	contig11823	0	96	1197	length=935 numreads=12
Unigene1841_Taxus																							contig11688	0	98	1358	length=1113 numreads=21
Unigene1842_Taxus																							contig07010	4e-07	87	54	length=1934 numreads=27
Unigene1843_Taxus
Unigene1844_Taxus
Unigene1845_Taxus	GQ03321_N03.1	406	653	445	198	221/248		2e-73	89	278	clone=GQ03321_N03 cluster=GQ03115_B24 status=complete	GQ03115_B24.1	406	653	666	419	221/248		4e-74	89	278	clone=GQ03115_B24 cluster=GQ03115_B24 status=5	contig34503	0	99	1271	length=1083 numreads=108	contig01691	2e-57	87	220	length=404 numreads=2
Unigene1846_Taxus	GQ03224_A03.1	361	962	874	273	520/602	3' read(R)	1e-153	86	543	clone=GQ03224_A03 cluster=GQ04006_F14 status=5	GQ04006_F14.1	343	748	409	4	342/406	5' read(R)	1e-79	84	297	clone=GQ04006_F14 cluster=GQ04006_F14 status=complete gb=BT118434	contig11358	0	99	3673	length=1941 numreads=49	FXAT9O003C6DAO	0	98	926
Unigene1847_Taxus																							contig03577	6e-68	99	256	length=433 numreads=46
Unigene1848_Taxus																							contig09034	1e-139	96	494	length=1146 numreads=94	contig05807	1e-145	96	509	length=464 numreads=5
Unigene1849_Taxus	GQ02815_P16.2	1580	2116	466	1002	482/537		1e-178	89	628	clone=GQ02815_P16 cluster=GQ02815_P16 status=complete gb=BT104861	GQ02815_P16.2	1580	2116	466	1002	482/537		1e-179	89	628	clone=GQ02815_P16 cluster=GQ02815_P16 status=complete gb=BT104861	contig20817	0	99	1449	length=1926 numreads=26	FXAT9O003DNZD3	0	99	720
Unigene1850_Taxus	WS00752_I05.1	347	475	687	559	113/129		1e-28	87	129	clone=WS00752_I05 cluster=GQ03212_H15 status=3	GQ03212_H15.1	347	475	1041	913	113/129		2e-29	87	129	clone=GQ03212_H15 cluster=GQ03212_H15 status=complete gb=BT109793	contig06649	0	98	944	length=1432 numreads=25
Unigene1851_Taxus	GQ03206_O13.2	1	102	726	625	93/102		1e-29	91	131	clone=GQ03206_O13 cluster=GQ03206_O13 status=complete gb=BT109303	GQ03206_O13.2	1	102	726	625	93/102		2e-30	91	131	clone=GQ03206_O13 cluster=GQ03206_O13 status=complete gb=BT109303	contig36325	5e-65	90	246	length=199 numreads=7
Unigene1852_Taxus
Unigene1853_Taxus												GQ04102_D18.1	480	540	375	435	54/61		8e-10	88	65.9	clone=GQ04102_D18 cluster=GQ04102_D18 status=complete gb=BT119169	contig15076	0	99	2835	length=1855 numreads=43	contig05521	0	99	650	length=332 numreads=3
Unigene1854_Taxus
Unigene1855_Taxus																							contig27821	3e-23	88	107	length=574 numreads=16
Unigene1856_Taxus	GQ02825_F05.1	292	392	249	149	87/101		6e-17	86	89.7	clone=GQ02825_F05 cluster=GQ02825_F05 status=complete gb=BT105627	GQ02825_F05.1	292	392	249	149	87/101		1e-17	86	89.7	clone=GQ02825_F05 cluster=GQ02825_F05 status=complete gb=BT105627	contig36487	9e-15	85	79.8	length=147 numreads=29	contig02841	1e-14	83	77.8	length=503 numreads=2
Unigene1857_Taxus												GQ03316_F13.4	79	152	414	341	62/74		3e-06	83	52	clone=GQ03316_F13 cluster=GQ03316_F13 status=complete gb=BT112499	contig34991	0	99	1061	length=792 numreads=34	FXAT9O003C947W	1e-146	99	515
Unigene1858_Taxus
Unigene1859_Taxus	WS03222_I16.1	429	617	582	394	167/189		4e-50	88	200	clone=WS03222_I16 cluster=GQ03325_L22 status=3
Unigene1860_Taxus																							contig27963	4e-34	100	143	length=566 numreads=6
Unigene1861_Taxus	GQ04105_B09.4	149	263	1871	1757	97/115		6e-16	84	85.7	clone=GQ04105_B09 cluster=GQ04105_B09 status=complete gb=BT119397	GQ04105_B09.4	149	263	1871	1757	97/115		1e-16	84	85.7	clone=GQ04105_B09 cluster=GQ04105_B09 status=complete gb=BT119397	contig24476	1e-118	95	422	length=1036 numreads=29	contig03124	1e-118	95	422	length=612 numreads=8
Unigene1862_Taxus																												contig05218	5e-50	99	194	length=435 numreads=12
Unigene1863_Taxus
Unigene1864_Taxus																							contig24447	1e-167	98	587	length=741 numreads=10
Unigene1865_Taxus																							contig15703	1e-153	97	539	length=570 numreads=7
Unigene1866_Taxus
Unigene1867_Taxus	GQ03216_I12.1	709	956	491	244	220/248		8e-71	88	270	clone=GQ03216_I12 cluster=GQ02809_J20 status=5	GQ02809_J20.1	709	956	525	278	219/248		4e-69	88	262	clone=GQ02809_J20 cluster=GQ02809_J20 status=complete gb=BT104365	contig12685	0	98	1762	length=1366 numreads=32	FXAT9O003C7ENZ	1e-154	98	543
Unigene1868_Taxus																							contig07480	1e-125	97	446	length=641 numreads=7	FXAT9O003C0QRT	0	97	686
Unigene1869_Taxus																							contig30851	1e-38	97	159	length=268 numreads=2	FXAT9O003DLY16	7e-41	98	165
Unigene1870_Taxus	WS0268_L16.1	3	100	318	415	84/98		2e-15	85	83.8	clone=WS0268_L16 cluster=GQ03201_J21 status=complete	GQ03201_J21.1	3	100	1189	1286	84/98		4e-16	85	83.8	clone=GQ03201_J21 cluster=GQ03201_J21 status=complete gb=BT108834	contig28313	5e-52	100	202	length=554 numreads=7
Unigene1871_Taxus	GQ04108_H18.1	1	619	614	1233	532/620		1e-147	85	523	clone=GQ04108_H18 cluster=GQ04108_H18 status=complete gb=BT119663	GQ04108_H18.1	1	619	614	1233	532/620		1e-148	85	523	clone=GQ04108_H18 cluster=GQ04108_H18 status=complete gb=BT119663	contig11771	0	97	1320	length=1577 numreads=36	FXAT9O003DE6G3	0	97	795
Unigene1872_Taxus																							contig20117	0	98	688	length=460 numreads=6
Unigene1873_Taxus																							contig10138	8e-45	88	180	length=1636 numreads=57	FXAT9O003DOP51	2e-58	81	224
Unigene1874_Taxus	GQ0033_H17.1	217	357	26	166	121/141		2e-26	85	121	clone=GQ0033_H17 cluster=GQ0033_H17 status=3	GQ0033_H17.1	217	357	26	166	121/141		4e-27	85	121	clone=GQ0033_H17 cluster=GQ0033_H17 status=3	contig28766	4e-11	86	67.9	length=677 numreads=4	FXAT9O003DPU4C	2e-08	89	58
Unigene1875_Taxus																							contig07414	1e-52	85	204	length=1259 numreads=18
Unigene1876_Taxus																												FXAT9O003CYRFY	0	98	880
Unigene1877_Taxus																												FXAT9O003DKB5R	1e-22	100	103
Unigene1878_Taxus
Unigene1879_Taxus																							contig01477	0	99	793	length=1486 numreads=105	FXAT9O003DFUP4	3e-32	85	137
Unigene1880_Taxus																							contig22017	1e-113	100	406	length=878 numreads=10	FXAT9O003C49BE	4e-15	100	79.8
Unigene1881_Taxus	GQ03230_M01.1	1433	2028	295	890	504/596		1e-125	84	452	clone=GQ03230_M01 cluster=GQ03230_M01 status=complete gb=BT110980	GQ03230_M01.1	1433	2028	295	890	504/596		1e-126	84	452	clone=GQ03230_M01 cluster=GQ03230_M01 status=complete gb=BT110980	contig31044	0	99	1076	length=558 numreads=6
Unigene1882_Taxus	GQ03226_F20.1	143	231	896	984	81/89		2e-24	91	113	clone=GQ03226_F20 cluster=GQ03226_F20 status=complete gb=BT110691	GQ03226_F20.1	143	231	896	984	81/89		5e-25	91	113	clone=GQ03226_F20 cluster=GQ03226_F20 status=complete gb=BT110691	contig19990	6e-55	100	212	length=1487 numreads=16	FXAT9O003C90M0	5e-56	100	214
Unigene1883_Taxus	WS03223_H11.1	1	553	60	606	464/553		1e-105	83	383	clone=WS03223_H11 cluster=WS03223_H11 status=complete	WS03223_H11.1	1	553	60	606	464/553		1e-105	83	383	clone=WS03223_H11 cluster=WS03223_H11 status=complete	contig09508	0	97	1612	length=1706 numreads=36	FXAT9O003DHS9K	0	97	864
Unigene1884_Taxus	GQ03325_L03.1	394	644	289	539	212/251		1e-46	84	188	clone=GQ03325_L03 cluster=GQ03205_F01 status=5	GQ03205_F01.2	394	644	902	1152	211/251		7e-45	84	180	clone=GQ03205_F01 cluster=GQ03205_F01 status=complete gb=BT109157	contig13605	0	98	1074	length=574 numreads=29	FXAT9O003DHNJY	1e-144	96	507
Unigene1885_Taxus
Unigene1886_Taxus
Unigene1887_Taxus
Unigene1888_Taxus
Unigene1889_Taxus																							contig30911	1e-103	96	371	length=379 numreads=3
Unigene1890_Taxus	GQ02820_H01.1	1333	1648	701	1016	260/316		3e-44	82	182	clone=GQ02820_H01 cluster=GQ02820_H01 status=complete gb=BT105277	GQ02820_H01.1	1333	1648	701	1016	260/316		6e-45	82	182	clone=GQ02820_H01 cluster=GQ02820_H01 status=complete gb=BT105277	contig06195	0	99	2995	length=2022 numreads=34	contig06180	4e-06	83	52	length=394 numreads=3
Unigene1891_Taxus	GQ03002_J20.2	133	202	998	1067	60/70		3e-08	85	60	clone=GQ03002_J20 cluster=GQ03002_J20 status=complete gb=BT106480	GQ03002_J20.2	133	202	998	1067	60/70		5e-09	85	60	clone=GQ03002_J20 cluster=GQ03002_J20 status=complete gb=BT106480	contig05539	3e-87	94	319	length=1766 numreads=38
Unigene1892_Taxus																							contig21046	0	98	1622	length=1062 numreads=33
Unigene1893_Taxus
Unigene1894_Taxus																							contig26657	3e-16	100	83.8	length=430 numreads=2
Unigene1895_Taxus	GQ02823_G18.2	127	194	1290	1223	64/68		2e-21	94	103	clone=GQ02823_G18 cluster=GQ02823_G18 status=complete gb=BT105497	GQ02823_G18.2	127	194	1290	1223	64/68		4e-22	94	103	clone=GQ02823_G18 cluster=GQ02823_G18 status=complete gb=BT105497	contig25937	2e-26	95	117	length=330 numreads=3
Unigene1896_Taxus	WS00750_L02.1	1	191	191	1	166/191	5' read(R)	3e-44	86	180	clone=WS00750_L02 cluster=WS0086_G20 status=complete	WS0086_G20.1	1	150	275	126	130/150		2e-32	86	139	clone=WS0086_G20 cluster=WS0086_G20 status=3	contig07790	0	99	965	length=1300 numreads=36	contig04460	0	99	965	length=801 numreads=4
Unigene1897_Taxus	GQ03806_F03.1	9	140	165	296	110/132		2e-16	83	87.7	clone=GQ03806_F03 cluster=GQ02824_K22 status=complete	GQ01312_J18.1	66	143	184	261	69/78		6e-16	88	83.8	clone=GQ01312_J18 cluster=GQ01312_J18 status=complete gb=BT101762	contig25725	1e-160	96	563	length=502 numreads=13	FXAT9O003C0NE3	3e-55	94	212
Unigene1898_Taxus	GQ03320_P11.1	140	247	448	341	97/108		3e-28	89	127	clone=GQ03320_P11 cluster=GQ03320_P11 status=complete gb=BT112786	GQ03320_P11.1	140	247	448	341	97/108		5e-29	89	127	clone=GQ03320_P11 cluster=GQ03320_P11 status=complete gb=BT112786	contig20030	2e-19	93	95.6	length=907 numreads=13	FXAT9O003DABGP	8e-81	100	297
Unigene1899_Taxus																												contig03453	8e-06	93	48.1	length=238 numreads=7
Unigene1900_Taxus
Unigene1901_Taxus
Unigene1902_Taxus																												FXAT9O003C7NR6	3e-47	98	186
Unigene1903_Taxus																							contig20001	4e-33	100	141	length=620 numreads=16
Unigene1904_Taxus																							contig05118	2e-26	100	119	length=1231 numreads=18
Unigene1905_Taxus																							contig11642	1e-119	100	426	length=1309 numreads=98
Unigene1906_Taxus
Unigene1907_Taxus	GQ03123_C15.1	663	708	664	709	44/46		3e-12	95	75.8	clone=GQ03123_C15 cluster=GQ03123_C15 status=complete gb=BT108530	GQ03123_C15.1	663	708	664	709	44/46		5e-13	95	75.8	clone=GQ03123_C15 cluster=GQ03123_C15 status=complete gb=BT108530	contig20906	3e-08	97	60	length=1330 numreads=16	FXAT9O003DA0I9	1e-07	94	56
Unigene1908_Taxus																							contig20766	4e-31	94	133	length=711 numreads=11
Unigene1909_Taxus
Unigene1910_Taxus
Unigene1911_Taxus
Unigene1912_Taxus																							contig21115	5e-47	98	186	length=657 numreads=17
Unigene1913_Taxus																							contig04505	1e-135	94	480	length=1101 numreads=46
Unigene1914_Taxus																							contig19965	3e-13	93	73.8	length=625 numreads=101
Unigene1915_Taxus																							contig26926	6e-27	97	119	length=509 numreads=7	FXAT9O003C9MD4	6e-06	91	48.1
Unigene1916_Taxus	GQ0255_K05.2	256	497	825	584	196/242		1e-24	80	115	clone=GQ0255_K05 cluster=GQ0255_K05 status=complete gb=BT103501	GQ0255_K05.2	256	497	825	584	196/242		2e-25	80	115	clone=GQ0255_K05 cluster=GQ0255_K05 status=complete gb=BT103501	contig16485	5e-20	80	97.6	length=1504 numreads=27	FXAT9O003DDNND	9e-07	92	52
Unigene1917_Taxus																							contig23192	3e-77	100	287	length=281 numreads=4	FXAT9O003C2CTS	1e-95	99	347
Unigene1918_Taxus	GQ03513_G14.2	4000	4992	1	990	836/993	5' read(F)	0	84	720	clone=GQ03513_G14 cluster=GQ03513_G14 status=5	GQ03513_G14.2	4000	4992	1	990	836/993	5' read(F)	0	84	720	clone=GQ03513_G14 cluster=GQ03513_G14 status=5	contig22984	0	99	1402	length=871 numreads=18
Unigene1919_Taxus																							contig09668	6e-21	98	99.6	length=234 numreads=5
Unigene1920_Taxus
Unigene1921_Taxus																							contig16906	1e-110	87	400	length=1260 numreads=62	FXAT9O003DI2QE	1e-121	95	434
Unigene1922_Taxus																							contig29725	1e-86	99	317	length=673 numreads=5
Unigene1923_Taxus
Unigene1924_Taxus																							contig15819	0	96	1253	length=2737 numreads=72
Unigene1925_Taxus																							contig03096	0	99	638	length=1613 numreads=33
Unigene1926_Taxus	GQ03616_D19.1	3993	4193	83	283	172/201		1e-39	85	168	clone=GQ03616_D19 cluster=GQ03108_F06 status=complete	GQ03108_F06.1	4002	4193	431	622	163/192		4e-35	84	151	clone=GQ03108_F06 cluster=GQ03108_F06 status=complete gb=BT107494	contig19463	0	99	1703	length=1259 numreads=24	FXAT9O003CXSY0	1e-161	99	567
Unigene1927_Taxus												GQ02811_L14.2	40	169	703	832	104/130		2e-06	80	52	clone=GQ02811_L14 cluster=GQ02811_L14 status=complete gb=BT104552	contig30485	2e-93	100	341	length=1890 numreads=34
Unigene1928_Taxus
Unigene1929_Taxus	GQ04108_O21.1	126	214	754	842	77/89		8e-15	86	81.8	clone=GQ04108_O21 cluster=GQ04108_O21 status=complete gb=BT119697	GQ04108_O21.1	126	214	754	842	77/89		1e-15	86	81.8	clone=GQ04108_O21 cluster=GQ04108_O21 status=complete gb=BT119697	contig05215	5e-18	87	89.7	length=1907 numreads=79	FXAT9O003DE6JR	4e-44	100	174
Unigene1930_Taxus																							contig14516	6e-33	96	139	length=1736 numreads=22
Unigene1931_Taxus
Unigene1932_Taxus	WS00724_M21.1	10	98	356	268	77/89		1e-14	86	81.8	clone=WS00724_M21 cluster=GQ03122_F15 status=3	GQ03122_F15.1	10	98	838	750	77/89		3e-15	86	81.8	clone=GQ03122_F15 cluster=GQ03122_F15 status=complete gb=BT108473	contig35543	9e-52	100	202	length=116 numreads=16
Unigene1933_Taxus																							contig00974	0	97	1068	length=604 numreads=20	FXAT9O003CWDSA	0	98	698
Unigene1934_Taxus
Unigene1935_Taxus																												FXAT9O003C5EPO	5e-50	99	194
Unigene1936_Taxus																							contig33418	8e-65	95	246	length=158 numreads=6
Unigene1937_Taxus	GQ03119_B10.1	402	467	338	403	57/66		9e-08	86	60	clone=GQ03119_B10 cluster=GQ03106_C22 status=5	GQ03106_C22.1	402	467	670	735	57/66		2e-08	86	60	clone=GQ03106_C22 cluster=GQ03106_C22 status=complete gb=BT107351	contig01001	0	97	765	length=587 numreads=19
Unigene1938_Taxus	WS03223_D10.1	50	87	261	298	35/38		7e-06	92	52	clone=WS03223_D10 cluster=GQ03714_L10 status=3	GQ03714_L10.1	50	87	970	1007	35/38		1e-06	92	52	clone=GQ03714_L10 cluster=GQ03714_L10 status=complete gb=BT116255	contig18914	8e-20	93	95.6	length=393 numreads=11	FXAT9O003DI7E2	3e-29	96	125
Unigene1939_Taxus	GQ02781_G03.1	6	329	509	828	275/324		6e-66	84	252	clone=GQ02781_G03 cluster=GQ02781_G03 status=5	GQ02781_G03.1	6	329	509	828	275/324		1e-66	84	252	clone=GQ02781_G03 cluster=GQ02781_G03 status=5	contig08471	8e-18	83	89.7	length=1351 numreads=69	contig00784	3e-18	83	89.7	length=1282 numreads=30
Unigene1940_Taxus																												FXAT9O003C2SQA	4e-41	94	165
Unigene1941_Taxus																							contig09111	0	98	928	length=1194 numreads=17	contig05689	0	98	1049	length=842 numreads=7
Unigene1942_Taxus																							contig13182	1e-137	89	486	length=404 numreads=15	FXAT9O003C5AEQ	1e-121	96	432
Unigene1943_Taxus
Unigene1944_Taxus																							contig13273	7e-77	88	285	length=922 numreads=21
Unigene1945_Taxus																							contig21580	1e-131	100	464	length=1561 numreads=10
Unigene1946_Taxus
Unigene1947_Taxus
Unigene1948_Taxus
Unigene1949_Taxus
Unigene1950_Taxus	GQ03805_A03.2	157	207	66	16	46/51		7e-09	90	61.9	clone=GQ03805_A03 cluster=GQ03805_A03 status=complete gb=BT116699	GQ03805_A03.2	157	207	66	16	46/51		1e-09	90	61.9	clone=GQ03805_A03 cluster=GQ03805_A03 status=complete gb=BT116699						FXAT9O003CW1U3	2e-40	100	163
Unigene1951_Taxus	GQ03319_D16.1	3	617	730	116	537/615		1e-170	87	601	clone=GQ03319_D16 cluster=GQ03818_L05 status=5	GQ03818_L05.1	3	617	973	360	537/615		1e-168	87	593	clone=GQ03818_L05 cluster=GQ03818_L05 status=complete gb=BT117399	contig24659	0	99	862	length=795 numreads=7	contig01875	0	98	753	length=406 numreads=2
Unigene1952_Taxus
Unigene1953_Taxus																							contig18686	1e-107	98	387	length=1026 numreads=19
Unigene1954_Taxus	GQ03118_N05.1	873	1046	647	474	141/174		1e-14	81	83.8	clone=GQ03118_N05 cluster=GQ04004_O18 status=5												contig10426	0	99	1495	length=1704 numreads=27	contig06101	1e-155	99	547	length=287 numreads=2
Unigene1955_Taxus
Unigene1956_Taxus																							contig23089	4e-56	94	218	length=277 numreads=3
Unigene1957_Taxus	GQ03815_I24.1	326	632	232	538	256/307		4e-51	83	204	clone=GQ03815_I24 cluster=GQ0042_C18 status=complete	GQ0042_C18.1	360	652	401	693	242/293		2e-43	82	176	clone=GQ0042_C18 cluster=GQ0042_C18 status=complete gb=BT100755	contig00166	0	98	1800	length=1382 numreads=94
Unigene1958_Taxus	GQ02824_D22.2	1024	1173	721	572	126/150		8e-22	84	107	clone=GQ02824_D22 cluster=GQ02824_D22 status=complete gb=BT105550	GQ02824_D22.2	1024	1173	721	572	126/150		1e-22	84	107	clone=GQ02824_D22 cluster=GQ02824_D22 status=complete gb=BT105550	contig18271	0	99	1197	length=1296 numreads=42	FXAT9O003CW75B	0	99	874
Unigene1959_Taxus
Unigene1960_Taxus
Unigene1961_Taxus
Unigene1962_Taxus
Unigene1963_Taxus
Unigene1964_Taxus	WS0327_K20.1	321	555	242	8	194/235	5' read(R)	3e-32	82	141	clone=WS0327_K20 cluster=WS0327_K20 status=complete	WS0327_K20.1	321	555	242	8	194/235	5' read(R)	5e-33	82	141	clone=WS0327_K20 cluster=WS0327_K20 status=complete	contig11987	1e-132	93	470	length=671 numreads=5
Unigene1965_Taxus																							contig11989	7e-68	100	256	length=724 numreads=12
Unigene1966_Taxus																							contig24944	2e-19	82	95.6	length=984 numreads=17	contig02710	1e-152	99	533	length=494 numreads=3
Unigene1967_Taxus	GQ02012_H08.1	442	1141	123	819	633/700		0	90	852	clone=GQ02012_H08 cluster=GQ03203_O04 status=complete	GQ03203_O04.1	442	1141	588	1284	632/700		0	90	844	clone=GQ03203_O04 cluster=GQ03203_O04 status=complete gb=BT109027	contig02919	0	99	2317	length=1797 numreads=38	FXAT9O003DF8HP	0	99	749
Unigene1968_Taxus																							contig25698	2e-55	99	214	length=598 numreads=9
Unigene1969_Taxus	WS02617_L14.1	537	596	279	337	56/60		1e-13	93	79.8	clone=WS02617_L14 cluster=GQ03112_K02 status=3	GQ03112_K02.4	537	596	1628	1686	56/60		2e-14	93	79.8	clone=GQ03112_K02 cluster=GQ03112_K02 status=complete gb=BT107777	contig29738	1e-127	95	454	length=271 numreads=3
Unigene1970_Taxus																							contig28260	1e-34	97	145	length=466 numreads=6	FXAT9O003C0VUI	1e-105	97	377
Unigene1971_Taxus
Unigene1972_Taxus
Unigene1973_Taxus																							contig13860	1e-107	99	387	length=1566 numreads=20	contig06911	1e-107	99	385	length=317 numreads=2
Unigene1974_Taxus
Unigene1975_Taxus
Unigene1976_Taxus
Unigene1977_Taxus
Unigene1978_Taxus
Unigene1979_Taxus
Unigene1980_Taxus	GQ04112_G07.1	9	151	397	255	122/143		2e-25	85	117	clone=GQ04112_G07 cluster=GQ02810_O21 status=5	GQ02810_O21.1	9	151	260	118	122/143		4e-26	85	117	clone=GQ02810_O21 cluster=GQ02810_O21 status=complete gb=BT104484	contig02580	1e-155	97	545	length=1123 numreads=67
Unigene1981_Taxus																							contig27293	3e-47	98	186	length=361 numreads=2
Unigene1982_Taxus																							contig11002	0	97	646	length=1041 numreads=38
Unigene1983_Taxus																							contig09838	1e-140	97	496	length=1641 numreads=45	contig01671	2e-29	90	127	length=482 numreads=3
Unigene1984_Taxus																							contig05277	0	98	676	length=1331 numreads=26
Unigene1985_Taxus	GQ03325_P02.1	193	1082	1066	180	764/890		0	85	761	clone=GQ03325_P02 cluster=GQ03325_P02 status=complete gb=BT113115	GQ03325_P02.1	193	1082	1066	180	764/890		0	85	761	clone=GQ03325_P02 cluster=GQ03325_P02 status=complete gb=BT113115	contig12862	0	95	1556	length=1779 numreads=29	contig01859	0	94	1134	length=862 numreads=5
Unigene1986_Taxus	GQ03711_N04.1	762	1084	1929	1607	265/323		1e-43	82	180	clone=GQ03711_N04 cluster=GQ03711_N04 status=complete gb=BT116098	GQ03711_N04.1	762	1084	1929	1607	265/323		2e-44	82	180	clone=GQ03711_N04 cluster=GQ03711_N04 status=complete gb=BT116098	contig08876	0	99	2914	length=2155 numreads=75	FXAT9O003DGPT1	0	95	781
Unigene1987_Taxus	GQ01303_M07.1	2663	2755	84	176	82/93		2e-18	88	97.6	clone=GQ01303_M07 cluster=GQ03119_I21 status=5	GQ04104_M05.1	1387	1450	439	502	58/64		9e-14	90	79.8	clone=GQ04104_M05 cluster=GQ04104_M05 status=complete gb=BT119369	contig11970	0	98	4248	length=2248 numreads=37	contig06161	1e-121	97	436	length=426 numreads=2
Unigene1988_Taxus																							contig19654	2e-30	87	131	length=632 numreads=14
Unigene1989_Taxus
Unigene1990_Taxus
Unigene1991_Taxus																							contig09002	1e-167	97	587	length=474 numreads=21	contig00718	1e-97	96	353	length=341 numreads=3
Unigene1992_Taxus	GQ03011_N02.1	862	947	391	306	77/86		2e-19	89	99.6	clone=GQ03011_N02 cluster=GQ03011_N02 status=complete gb=BT106838	GQ03011_N02.1	862	947	391	306	77/86		4e-20	89	99.6	clone=GQ03011_N02 cluster=GQ03011_N02 status=complete gb=BT106838	contig19657	0	97	1899	length=1097 numreads=147
Unigene1993_Taxus	WS00736_N16.1	624	819	184	379	165/196		1e-32	84	143	clone=WS00736_N16 cluster=WS00736_N16 status=complete	WS00736_N16.1	624	819	184	379	165/196		2e-33	84	143	clone=WS00736_N16 cluster=WS00736_N16 status=complete	contig16896	0	99	1102	length=831 numreads=11	FXAT9O003DKP6G	1e-110	98	394
Unigene1994_Taxus
Unigene1995_Taxus	WS0268_O02.1	149	277	39	167	118/129		1e-40	91	168	clone=WS0268_O02 cluster=GQ04102_A22 status=complete	GQ04102_A22.1	149	271	546	668	112/123		7e-38	91	157	clone=GQ04102_A22 cluster=GQ04102_A22 status=complete gb=BT119153	contig10981	1e-118	100	424	length=467 numreads=7
Unigene1996_Taxus																							contig29322	3e-10	87	63.9	length=428 numreads=3	FXAT9O003DF0JD	1e-38	95	157
Unigene1997_Taxus
[truncated: 34,498 more rows]
