# Supplementary material for: The First Insight into the Tissue Specific Taxus Transcriptome via Illumina Second Generation Sequencing
Source: PLoS One. 2011 Jun 22;6(6):e21220. doi: 10.1371/journal.pone.0021220 (PMC3120849; doi:10.1371/journal.pone.0021220)
Supplement: Table S5 — Differentially expressed genes between root and leaf. TPM: transcript copies per million tags. Raw intensity: the total number of tags sequenced for each gene. FDR: false discovery rate. We used FDR ≤0.001 and the absolute value of log2Ratio ≥1 as the threshold to judge the significance of gene expression difference. In order to calculate the log2Ratio and FDR, we used TPM value of 0.001 instead of 0 for genes that do not express in one sample. (XLS) [file pone.0021220.s005.xls]

## Sheet: genvsye.DiffGeneExpFilter
Table S5 Differentially expressed genes between root and leaf
Gene	RawIntensity-root	RawIntensity-leaf	TPM-root	TPM-leaf	log2 Ratio(leaf/root)	P-Value	FDR	GO Component	GO Function	GO Process	blast nr
Unigene14556_Taxus	0	RawIntensity-ye	0.01	3752.24	18.5174	0	0	-	-	-	gi|121663827|dbj|BAF44533.1|/4e-14/class IV chitinase [Nicotiana tabacum]
Unigene30337_Taxus	0	RawIntensity-ye	0.01	606.01	15.8871	0	0	-	-	-	gi|216296854|gb|ACJ72160.1|/6e-36/UGT3 [Pueraria montana var. lobata]
Unigene29919_Taxus	0	RawIntensity-ye	0.01	483.19	15.5603	0	0	GO:0016021//integral to membrane;GO:0009579//thylakoid;GO:0009538//photosystem I reaction center;GO:0009507//chloroplast	-	GO:0015979//photosynthesis	gi|119358797|emb|CAL52060.2|/3e-12/PsaL photosystem I subunit XI precursor (IC) [Ostreococcus tauri]
Unigene12662_Taxus	0	RawIntensity-ye	0.01	459.43	15.4876	0	0	-	-	GO:0009409//response to cold	gi|193806744|sp|Q9LPK5.2|CML44_ARATH/1e-17/RecName: Full=Probable calcium-binding protein CML44; AltName: Full=Calmodulin-like protein 44
Unigene7649_Taxus	0	RawIntensity-ye	0.01	319.23	14.9623	0	0	-	-	-	gi|115476576|ref|NP_001061884.1|/2e-08/Os08g0435900 [Oryza sativa (japonica cultivar-group)] >gi|113623853|dbj|BAF23798.1| Os08g0435900 [Oryza sativa Japonica Group]
Unigene20817_Taxus	0	RawIntensity-ye	0.01	241.3	14.5585	0	0	-	-	-	gi|7228236|emb|CAA16760.2|/2e-66/nodulin-26-like protein [Arabidopsis thaliana] >gi|7268698|emb|CAB78905.1| nodulin-26-like protein [Arabidopsis thaliana]
Unigene15466_Taxus	0	RawIntensity-ye	0.01	216.39	14.4013	0	0	-	-	-	gi|159482576|ref|XP_001699345.1|/1e-44/flavoprotein [Chlamydomonas reinhardtii] >gi|158272981|gb|EDO98775.1| flavoprotein [Chlamydomonas reinhardtii]
Unigene17272_Taxus	0	RawIntensity-ye	0.01	209.73	14.3562	0	0	-	-	-	gi|227204195|dbj|BAH56949.1|/6e-57/AT1G22360 [Arabidopsis thaliana]
Unigene8772_Taxus	0	RawIntensity-ye	0.01	193.51	14.2401	0	0	-	-	-	gi|79568805|ref|NP_181242.3|/8e-42/kinase [Arabidopsis thaliana]
Unigene25613_Taxus	0	RawIntensity-ye	0.01	185.69	14.1806	0	0	-	-	-	-
Unigene3434_Taxus	0	RawIntensity-ye	0.01	165.7	14.0163	0	0	-	-	-	gi|62511235|sp|Q9M7D1.1|TPSD8_ABIGR/6e-12/RecName: Full=Beta-phellandrene synthase, chloroplastic; AltName: Full=(-)-(4S)-beta-phellandrene synthase; AltName: Full=Agg-Bphe; Flags: Precursor >gi|7381249|gb|AAF61453.1|AF139205_1 beta-phellandrene synthase [Abies grandis]
Unigene6876_Taxus	0	RawIntensity-ye	0.01	156.72	13.9359	0	0	-	-	-	-
Unigene30417_Taxus	0	RawIntensity-ye	0.01	156.72	13.9359	0	0	-	-	-	gi|164519779|gb|ABY59947.1|/2e-09/nectar protein 1 [Jacaranda mimosifolia]
Unigene23331_Taxus	0	RawIntensity-ye	0.01	150.63	13.8787	0	0	-	-	-	-
Unigene22086_Taxus	0	RawIntensity-ye	0.01	140.21	13.7753	0	0	-	-	-	-
Unigene25295_Taxus	0	RawIntensity-ye	0.01	111.24	13.4414	0	0	-	-	-	-
Unigene1052_Taxus	0	RawIntensity-ye	0.01	110.95	13.4376	0	0	-	-	-	gi|195622122|gb|ACG32891.1|/6e-38/yabby15 protein [Zea mays]
Unigene35951_Taxus	0	RawIntensity-ye	0.01	109.79	13.4225	0	0	-	-	-	gi|21952855|dbj|BAC06270.1|/7e-15/P0696G06.27 [Oryza sativa Japonica Group]
Unigene17730_Taxus	0	RawIntensity-ye	0.01	108.92	13.411	0	0	-	-	-	-
Unigene27777_Taxus	0	RawIntensity-ye	0.01	106.31	13.376	0	0	-	-	-	gi|108859343|emb|CAK26119.1|/3e-15/constans-like 1 [Picea abies]
Unigene36015_Taxus	0	RawIntensity-ye	0.01	103.71	13.3403	0	0	-	-	-	gi|255087290|ref|XP_002505568.1|/1e-127/Fructose-1,6-bisphosphatase [Micromonas sp. RCC299] >gi|226520838|gb|ACO66826.1| Fructose-1,6-bisphosphatase [Micromonas sp. RCC299]
Unigene33632_Taxus	0	RawIntensity-ye	0.01	93.86	13.1963	0	0	-	-	-	gi|16604344|gb|AAL24178.1|/3e-23/AT5g16970/F2K13_120 [Arabidopsis thaliana]
Unigene14047_Taxus	0	RawIntensity-ye	0.01	82.56	13.0112	0	0	-	-	-	gi|71726948|gb|AAZ39645.1|/1e-116/cytochrome P450 monooxygenase [Petunia x hybrida]
Unigene31596_Taxus	0	RawIntensity-ye	0.01	77.92	12.9278	0	0	-	-	-	gi|6730643|gb|AAF27064.1|AC008262_13/2e-13/F4N2.19 [Arabidopsis thaliana]
Unigene31405_Taxus	0	RawIntensity-ye	0.01	74.16	12.8564	0	0	-	-	-	gi|119514172|gb|ABL75837.1|/1e-12/PGR5 [Porphyra yezoensis]
Unigene34768_Taxus	0	RawIntensity-ye	0.01	74.16	12.8564	0	0	-	-	-	gi|81157982|dbj|BAE48241.1|/1e-43/tetrahydrocannabinolic acid synthase [Cannabis sativa]
Unigene33247_Taxus	0	RawIntensity-ye	0.01	71.26	12.7989	0	0	GO:0005634//nucleus	GO:0030528//transcription regulator activity	GO:0045449//regulation of transcription	gi|115440839|ref|NP_001044699.1|/3e-06/Os01g0831000 [Oryza sativa (japonica cultivar-group)] >gi|68565366|sp|Q7XAQ6.1|LAX_ORYSJ RecName: Full=Transcription factor LAX PANICLE >gi|33342172|dbj|BAC80247.1| transcription factor [Oryza sativa Japonica Group] >gi|56785174|dbj|BAD81850.1| transcription factor [Oryza sativa Japonica Group] >gi|113534230|dbj|BAF06613.1| Os01g0831000 [Oryza sativa Japonic…
Unigene28711_Taxus	0	RawIntensity-ye	0.01	64.02	12.6443	0	0	-	-	-	-
Unigene29867_Taxus	0	RawIntensity-ye	0.01	62.86	12.6179	0	0	-	GO:0016851//magnesium chelatase activity	GO:0015995//chlorophyll biosynthetic process	gi|116057194|emb|CAL51621.1|/2e-18/Magnesium chelatase H subunit (ISS) [Ostreococcus tauri]
Unigene33885_Taxus	0	RawIntensity-ye	0.01	61.99	12.5978	0	0	-	-	-	-
Unigene33470_Taxus	0	RawIntensity-ye	0.01	59.38	12.5358	0	0	-	GO:0016747//transferase activity, transferring acyl groups other than amino-acyl groups	-	gi|15241431|ref|NP_196403.1|/1e-23/transferase family protein [Arabidopsis thaliana] >gi|6562300|emb|CAB62598.1| N-hydroxycinnamoyl/benzoyltransferase-like protein [Arabidopsis thaliana] >gi|10176720|dbj|BAB09950.1| N-hydroxycinnamoyl/benzoyltransferase-like protein [Arabidopsis thaliana] >gi|17065196|gb|AAL32752.1| N-hydroxycinnamoyl/benzoyltransferase-like protein [Arabidopsis thaliana] >gi|231…
Unigene32679_Taxus	0	RawIntensity-ye	0.01	57.65	12.4931	0	0	-	-	-	gi|109729914|tpg|DAA05771.1|/6e-11/TPA: TPA_inf: class IV HD-Zip protein HDZ41 [Selaginella moellendorffii]
Unigene21105_Taxus	0	RawIntensity-ye	0.01	55.33	12.4338	0	0	-	-	-	gi|224059654|ref|XP_002299954.1|/3e-30/cytochrome P450 [Populus trichocarpa] >gi|222847212|gb|EEE84759.1| cytochrome P450 [Populus trichocarpa]
Unigene20785_Taxus	0	RawIntensity-ye	0.01	51.27	12.3239	0	0	-	-	-	gi|1200256|emb|CAA62476.1|/3e-74/stpk1 protein kinase [Solanum tuberosum]
Unigene18068_Taxus	0	RawIntensity-ye	0.01	48.96	12.2574	0	0	-	-	-	gi|17433068|sp|Q9M9B3.1|COL8_ARATH/1e-11/RecName: Full=Zinc finger protein CONSTANS-LIKE 8 >gi|7770330|gb|AAF69700.1|AC016041_5 F27J15.10 [Arabidopsis thaliana]
Unigene17831_Taxus	0	RawIntensity-ye	0.01	47.22	12.2052	0	0	-	-	-	gi|115454045|ref|NP_001050623.1|/2e-79/Os03g0602300 [Oryza sativa (japonica cultivar-group)] >gi|62510495|sp|Q8GSQ1.1|C85A1_ORYSJ RecName: Full=Cytochrome P450 85A1; AltName: Full=C6-oxidase; AltName: Full=Dwarf protein; AltName: Full=OsDWARF >gi|27127269|dbj|BAC45000.1| cytochrome P450 [Oryza sativa Japonica Group] >gi|50838910|gb|AAT81671.1| cytochrome P450 [Oryza sativa Japonica Group] >gi|113…
Unigene149_Taxus	0	RawIntensity-ye	0.01	46.64	12.1874	0	0	-	-	-	gi|113205376|gb|AAU93592.2|/8e-06/uncharacterized plant-specific domain TIGR01589 family protein [Solanum demissum]
Unigene4146_Taxus	0	RawIntensity-ye	0.01	46.64	12.1874	0	0	-	-	-	gi|224122352|ref|XP_002330602.1|/5e-09/predicted protein [Populus trichocarpa] >gi|222872160|gb|EEF09291.1| predicted protein [Populus trichocarpa]
Unigene11032_Taxus	0	RawIntensity-ye	0.01	41.13	12.006	0	0	-	-	-	-
Unigene11637_Taxus	0	RawIntensity-ye	0.01	39.11	11.9333	0	0	-	-	-	gi|148905856|gb|ABR16090.1|/3e-18/unknown [Picea sitchensis]
Unigene21334_Taxus	0	RawIntensity-ye	0.01	38.82	11.9226	0	0	-	-	-	gi|108709892|gb|ABF97687.1|/6e-07/expressed protein [Oryza sativa (japonica cultivar-group)]
Unigene29840_Taxus	0	RawIntensity-ye	0.01	35.92	11.8106	0	0	-	-	-	gi|255078442|ref|XP_002502801.1|/5e-06/photosystem II PsbY protein [Micromonas sp. RCC299] >gi|226518067|gb|ACO64059.1| photosystem II PsbY protein [Micromonas sp. RCC299]
Unigene3276_Taxus	0	RawIntensity-ye	0.01	34.76	11.7632	0	0	-	-	-	gi|16588843|gb|AAL26915.1|AF323593_1/1e-11/thioredoxin H [Prunus persica]
Unigene28527_Taxus	0	RawIntensity-ye	0.01	33.31	11.7017	0	0	-	-	-	gi|8778808|gb|AAF79815.1|AC007396_8/2e-15/T4O12.13 [Arabidopsis thaliana]
Unigene18889_Taxus	0	RawIntensity-ye	0.01	32.44	11.6636	0	0	-	-	-	gi|149391193|gb|ABR25614.1|/2e-53/zn-dependent hydrolase [Oryza sativa Indica Group]
Unigene15066_Taxus	0	RawIntensity-ye	0.01	31.86	11.6375	0	0	-	-	-	-
Unigene16061_Taxus	0	RawIntensity-ye	0.01	31.86	11.6375	0	0	-	-	-	gi|224093838|ref|XP_002310014.1|/3e-27/cytochrome P450 [Populus trichocarpa] >gi|222852917|gb|EEE90464.1| cytochrome P450 [Populus trichocarpa]
Unigene20172_Taxus	0	RawIntensity-ye	0.01	31.58	11.6248	0	0	GO:0016020//membrane;GO:0005739//mitochondrion	-	GO:0006810//transport	gi|30696976|ref|NP_851209.1|/1e-114/ATCNGC5 (CYCLIC NUCLEOTIDE GATED CHANNEL 5); calmodulin binding / cyclic nucleotide binding / potassium channel [Arabidopsis thaliana] >gi|42568613|ref|NP_200602.2| ATCNGC5 (CYCLIC NUCLEOTIDE GATED CHANNEL 5); calmodulin binding / cyclic nucleotide binding / potassium channel [Arabidopsis thaliana] >gi|38503077|sp|Q8RWS9.1|CNGC5_ARATH RecName: Full=Probable cyc…
Unigene16176_Taxus	0	RawIntensity-ye	0.01	30.42	11.5708	0	0	-	-	-	gi|116793055|gb|ABK26600.1|/6e-06/unknown [Picea sitchensis]
Unigene30325_Taxus	0	RawIntensity-ye	0.01	29.55	11.5289	0	0	-	-	-	-
Unigene30081_Taxus	0	RawIntensity-ye	0.01	28.97	11.5003	0	0	-	-	-	gi|162463521|ref|NP_001105345.1|/5e-27/ferredoxin-1, chloroplastic precursor [Zea mays] >gi|119928|sp|P27787.1|FER1_MAIZE RecName: Full=Ferredoxin-1, chloroplastic; AltName: Full=Ferredoxin I; Short=Fd I; Flags: Precursor >gi|168469|gb|AAA33459.1| ferredoxin [Zea mays] >gi|168471|gb|AAA33460.1| ferredoxin [Zea mays] >gi|444685|prf||1907324B ferredoxin:ISOTYPE=I
Unigene35821_Taxus	0	RawIntensity-ye	0.01	28.68	11.4858	0	0	-	-	-	gi|108706386|gb|ABF94181.1|/2e-31/expressed protein [Oryza sativa (japonica cultivar-group)]
Unigene13962_Taxus	0	RawIntensity-ye	0.01	28.1	11.4564	0	0	-	-	-	gi|115451799|ref|NP_001049500.1|/9e-06/Os03g0238600 [Oryza sativa (japonica cultivar-group)] >gi|113547971|dbj|BAF11414.1| Os03g0238600 [Oryza sativa Japonica Group]
Unigene33714_Taxus	0	RawIntensity-ye	0.01	27.81	11.4414	0	0	-	-	-	gi|1723378|sp|P51202.1|YCF53_PORPU/2e-11/RecName: Full=Uncharacterized protein ycf53; AltName: Full=ORF238 >gi|1276668|gb|AAC08088.1| ORF238 [Porphyra purpurea]
Unigene35790_Taxus	0	RawIntensity-ye	0.01	26.65	11.3799	0	0	-	-	-	gi|255675993|dbj|BAH92932.1|/1e-06/Os05g0131300 [Oryza sativa Japonica Group]
Unigene29021_Taxus	0	RawIntensity-ye	0.01	26.07	11.3482	0	0	-	-	-	-
Unigene35258_Taxus	0	RawIntensity-ye	0.01	26.07	11.3482	0	0	-	-	-	gi|195610982|gb|ACG27321.1|/9e-40/putativ eribonuclease P [Zea mays]
Unigene3754_Taxus	0	RawIntensity-ye	0.01	25.78	11.332	0	0	-	-	-	gi|44917553|gb|AAS49101.1|/3e-08/At5g44310 [Arabidopsis thaliana] >gi|51970006|dbj|BAD43695.1| late embryogenesis abundant protein-like [Arabidopsis thaliana] >gi|51971018|dbj|BAD44201.1| late embryogenesis abundant protein-like [Arabidopsis thaliana]
Unigene19950_Taxus	0	RawIntensity-ye	0.01	25.78	11.332	0	0	-	-	-	gi|21617968|gb|AAM67018.1|/3e-08/thioredoxin [Arabidopsis thaliana]
Unigene31714_Taxus	0	RawIntensity-ye	0.01	25.78	11.332	0	0	-	-	-	-
Unigene19623_Taxus	0	RawIntensity-ye	0.01	25.49	11.3157	0	0	-	-	-	gi|207345222|gb|EDZ72112.1|/9e-06/YGR023Wp-like protein [Saccharomyces cerevisiae AWRI1631]
Unigene31740_Taxus	0	RawIntensity-ye	0.01	25.2	11.2992	0	0	-	-	-	-
Unigene12776_Taxus	0	RawIntensity-ye	0.01	24.91	11.2825	0	0	-	-	-	gi|71660782|sp|Q9ZPX0.1|GAT15_ARATH/6e-10/RecName: Full=GATA transcription factor 15 >gi|119360065|gb|ABL66761.1| At2g18380 [Arabidopsis thaliana]
Unigene24936_Taxus	0	RawIntensity-ye	0.01	24.33	11.2485	0	0	-	-	-	gi|2150134|gb|AAB71136.1|/1e-12/acid invertase [Asparagus officinalis]
Unigene36160_Taxus	0	RawIntensity-ye	0.01	24.04	11.2312	0	0	-	-	-	gi|115441537|ref|NP_001045048.1|/4e-72/Os01g0889900 [Oryza sativa (japonica cultivar-group)] >gi|113534579|dbj|BAF06962.1| Os01g0889900 [Oryza sativa Japonica Group]
Unigene11010_Taxus	0	RawIntensity-ye	0.01	23.75	11.2137	0	0	-	-	-	gi|15235567|ref|NP_195463.1|/1e-05/hydrolase, alpha/beta fold family protein [Arabidopsis thaliana]
Unigene17883_Taxus	0	RawIntensity-ye	0.01	22.31	11.1235	0	0	-	-	-	gi|226531498|ref|NP_001150434.1|/1e-10/catalytic/ hydrolase [Zea mays] >gi|195639226|gb|ACG39081.1| catalytic/ hydrolase [Zea mays]
Unigene4600_Taxus	0	RawIntensity-ye	0.01	22.31	11.1235	0	0	GO:0016020//membrane	GO:0016887//ATPase activity;GO:0000166//nucleotide binding	-	gi|24324262|gb|AAN28720.2|/0.0/MDR-like p-glycoprotein [Arabidopsis thaliana]
Unigene8322_Taxus	0	RawIntensity-ye	0.01	22.31	11.1235	0	0	-	-	-	gi|110931818|gb|ABH02908.1|/3e-56/MYB transcription factor MYB60 [Glycine max]
Unigene14771_Taxus	0	RawIntensity-ye	0.01	22.02	11.1046	0	0	-	-	-	-
Unigene2596_Taxus	0	RawIntensity-ye	0.01	21.73	11.0855	0	0	-	-	-	gi|50253464|gb|AAT71934.1|/1e-07/At2g47485 [Arabidopsis thaliana] >gi|51972104|gb|AAU15156.1| At2g47485 [Arabidopsis thaliana]
Unigene23177_Taxus	0	RawIntensity-ye	0.01	21.73	11.0855	0	0	-	-	-	-
Unigene6290_Taxus	0	RawIntensity-ye	0.01	21.44	11.0661	0	0	-	-	-	gi|18086420|gb|AAL57666.1|/1e-15/AT5g53140/MFH8_8 [Arabidopsis thaliana] >gi|22137282|gb|AAM91486.1| AT5g53140/MFH8_8 [Arabidopsis thaliana]
Unigene1417_Taxus	0	RawIntensity-ye	0.01	20.28	10.9858	0	0	-	-	-	gi|28883584|gb|AAO50082.1|/1e-119/cytokinin dehydrogenase 3 [Hordeum vulgare]
Unigene4355_Taxus	0	RawIntensity-ye	0.01	19.7	10.944	0	0	GO:0016023//cytoplasmic membrane-bounded vesicle	GO:0016798//hydrolase activity, acting on glycosyl bonds;GO:0005488//binding	GO:0008152//metabolic process	gi|157313306|gb|ABV32546.1|/6e-16/beta-galactosidase protein 1 [Prunus persica]
Unigene13286_Taxus	0	RawIntensity-ye	0.01	19.12	10.9009	0	0	-	-	-	gi|13487785|gb|AAK27719.1|AF356003_1/1e-135/ADP-glucose pyrophosphorylase large subunit CagpL2 [Cicer arietinum]
Unigene35302_Taxus	0	RawIntensity-ye	0.01	19.12	10.9009	0	0	-	-	-	gi|115476980|ref|NP_001062086.1|/3e-48/Os08g0485000 [Oryza sativa (japonica cultivar-group)] >gi|113624055|dbj|BAF24000.1| Os08g0485000 [Oryza sativa Japonica Group]
Unigene27712_Taxus	0	RawIntensity-ye	0.01	18.83	10.8788	0	0	-	-	-	-
Unigene33863_Taxus	0	RawIntensity-ye	0.01	18.83	10.8788	0	0	-	-	-	-
Unigene16380_Taxus	0	RawIntensity-ye	0.01	17.67	10.7871	0	0	-	-	-	gi|89953439|gb|ABD83313.1|/2e-14/Fgenesh protein 60 [Beta vulgaris]
Unigene29591_Taxus	0	RawIntensity-ye	0.01	17.38	10.7632	0	0	-	-	-	-
Unigene6456_Taxus	0	RawIntensity-ye	0.01	17.38	10.7632	0	0	-	-	-	gi|84514135|gb|ABC59076.1|/7e-83/cytochrome P450 monooxygenase CYP716A12 [Medicago truncatula]
Unigene10276_Taxus	0	RawIntensity-ye	0.01	17.09	10.7389	0	0	-	-	-	gi|90962944|gb|ABE02396.1|/7e-08/At3g52070 [Arabidopsis thaliana]
Unigene19778_Taxus	0	RawIntensity-ye	0.01	16.8	10.7142	0	0	-	-	-	-
Unigene36441_Taxus	0	RawIntensity-ye	0.01	16.8	10.7142	0	0	-	GO:0005215//transporter activity	GO:0006857//oligopeptide transport	gi|110736812|dbj|BAF00365.1|/1e-115/oligopeptide transporter - like protein [Arabidopsis thaliana]
Unigene19904_Taxus	0	RawIntensity-ye	0.01	16.51	10.6891	0	0	-	-	-	gi|186506216|ref|NP_181306.3|/7e-98/catalytic/ iron ion binding / oxidoreductase [Arabidopsis thaliana]
Unigene946_Taxus	0	RawIntensity-ye	0.01	16.22	10.6636	0	0	-	-	-	gi|115440191|ref|NP_001044375.1|/2e-22/Os01g0770100 [Oryza sativa (japonica cultivar-group)] >gi|113533906|dbj|BAF06289.1| Os01g0770100 [Oryza sativa Japonica Group]
Unigene19954_Taxus	0	RawIntensity-ye	0.01	16.22	10.6636	0	0	-	-	-	gi|224092400|ref|XP_002309592.1|/2e-28/2-oxoglutarate-dependent dioxygenase [Populus trichocarpa] >gi|222855568|gb|EEE93115.1| 2-oxoglutarate-dependent dioxygenase [Populus trichocarpa]
Unigene17446_Taxus	0	RawIntensity-ye	0.01	15.93	10.6375	0	0	-	-	-	-
Unigene35680_Taxus	0	RawIntensity-ye	0.01	15.93	10.6375	0	0	-	-	-	gi|50403823|gb|AAT76665.1|/1e-14/5-alpha-reductase [Pisum sativum]
Unigene16864_Taxus	0	RawIntensity-ye	0.01	15.93	10.6375	0	0	-	-	-	gi|116054885|emb|CAL56962.1|/5e-13/Predicted DNA damage inducible protein (ISS) [Ostreococcus tauri]
Unigene631_Taxus	0	RawIntensity-ye	0.01	15.93	10.6375	0	0	-	-	-	-
Unigene14475_Taxus	0	RawIntensity-ye	0.01	15.93	10.6375	0	0	GO:0005618//cell wall;GO:0009570//chloroplast stroma;GO:0005634//nucleus;GO:0048046//apoplast;GO:0009535//chloroplast thylakoid membrane	GO:0005515//protein binding;GO:0005524//ATP binding;GO:0003700//sequence-specific DNA binding transcription factor activity	GO:0042742//defense response to bacterium	gi|32481061|gb|AAP83927.1|/4e-10/Rubisco activase alpha form precursor [Deschampsia antarctica]
Unigene12667_Taxus	0	RawIntensity-ye	0.01	15.64	10.611	0	0	-	-	-	gi|258678888|dbj|BAI39990.1|/8e-06/metallothionein [Tamarix androssowii]
Unigene35215_Taxus	0	RawIntensity-ye	0.01	15.06	10.5565	1.33227e-15	1.91958e-14	-	-	-	gi|115439139|ref|NP_001043849.1|/1e-17/Os01g0676200 [Oryza sativa (japonica cultivar-group)] >gi|113533380|dbj|BAF05763.1| Os01g0676200 [Oryza sativa Japonica Group]
Unigene11907_Taxus	0	RawIntensity-ye	0.01	14.77	10.5285	3.55272e-15	4.94468e-14	-	-	-	gi|115486805|ref|NP_001068546.1|/3e-22/Os11g0704700 [Oryza sativa (japonica cultivar-group)] >gi|77552711|gb|ABA95508.1| RNA recognition motif family protein, expressed [Oryza sativa (japonica cultivar-group)] >gi|113645768|dbj|BAF28909.1| Os11g0704700 [Oryza sativa Japonica Group]
Unigene20132_Taxus	0	RawIntensity-ye	0.01	14.77	10.5285	3.55272e-15	4.94086e-14	GO:0044425//membrane part;GO:0009536//plastid	-	GO:0015979//photosynthesis	gi|6006279|dbj|BAA84769.1|/4e-69/photosystem II 22 kDa protein [Arabidopsis thaliana]
Unigene11474_Taxus	0	RawIntensity-ye	0.01	14.48	10.4998	7.54952e-15	1.02075e-13	-	-	-	-
Unigene36108_Taxus	0	RawIntensity-ye	0.01	14.19	10.4707	1.53211e-14	2.03182e-13	-	-	-	gi|79319580|ref|NP_001031160.1|/7e-13/zinc finger (B-box type) family protein [Arabidopsis thaliana] >gi|222424187|dbj|BAH20052.1| AT1G49130 [Arabidopsis thaliana]
Unigene15813_Taxus	0	RawIntensity-ye	0.01	13.9	10.4409	3.0198e-14	3.8762e-13	-	-	-	gi|186478618|ref|NP_001077559.2|/1e-16/NDF6 (NDH DEPENDENT FLOW 6) [Arabidopsis thaliana]
Unigene26573_Taxus	0	RawIntensity-ye	0.01	13.9	10.4409	3.0198e-14	3.87344e-13	-	-	-	gi|159475457|ref|XP_001695835.1|/1e-11/major facilitator superfamily transporter [Chlamydomonas reinhardtii] >gi|158275395|gb|EDP01172.1| major facilitator superfamily transporter [Chlamydomonas reinhardtii]
Unigene1897_Taxus	0	RawIntensity-ye	0.01	13.62	10.4115	5.86198e-14	7.31062e-13	GO:0016023//cytoplasmic membrane-bounded vesicle;GO:0016021//integral to membrane	-	-	gi|224112947|ref|XP_002316342.1|/4e-15/stress-induced hydrophobic peptide [Populus trichocarpa] >gi|222865382|gb|EEF02513.1| stress-induced hydrophobic peptide [Populus trichocarpa]
Unigene3243_Taxus	0	RawIntensity-ye	0.01	13.62	10.4115	5.86198e-14	7.30555e-13	-	-	-	gi|41223415|gb|AAR99710.1|/1e-12/NBS-LRR-like protein D [Oryza sativa Indica Group]
Unigene27850_Taxus	0	RawIntensity-ye	0.01	13.62	10.4115	5.86198e-14	7.3005e-13	-	-	-	gi|125578|sp|P27774.1|KPPR_MESCR/2e-47/RecName: Full=Phosphoribulokinase, chloroplastic; Short=PRKase; Short=PRK; AltName: Full=Phosphopentokinase; Flags: Precursor >gi|167266|gb|AAA33034.1| phosphoribulokinase [Mesembryanthemum crystallinum]
Unigene2730_Taxus	0	RawIntensity-ye	0.01	13.33	10.3805	1.12799e-13	1.31642e-12	-	-	-	-
Unigene7629_Taxus	0	RawIntensity-ye	0.01	13.33	10.3805	1.12799e-13	1.31557e-12	-	-	-	gi|171702835|dbj|BAG16373.1|/1e-132/cytokinin oxidase family protein [Brassica oleracea var. italica]
Unigene30560_Taxus	0	RawIntensity-ye	0.01	12.75	10.3163	4.1478e-13	4.37025e-12	-	-	-	gi|188570391|gb|ACD64231.1|/2e-07/proton-dependent oligopeptide transport-like protein [Helianthus annuus]
Unigene35217_Taxus	0	RawIntensity-ye	0.01	12.75	10.3163	4.1478e-13	4.36769e-12	-	-	-	gi|194477324|ref|YP_002049503.1|/2e-08/possible ferredoxin (2Fe-2S) [Paulinella chromatophora] >gi|171192331|gb|ACB43293.1| possible ferredoxin (2Fe-2S) [Paulinella chromatophora]
Unigene35773_Taxus	0	RawIntensity-ye	0.01	12.75	10.3163	4.1478e-13	4.36514e-12	-	-	-	gi|126635887|gb|ABO21830.1|/1e-42/UDP rhamnose:anthocyanidin-3-glucoside rhamnosyltransferase [Petunia axillaris]
Unigene7479_Taxus	0	RawIntensity-ye	0.01	12.46	10.2831	7.94476e-13	8.04128e-12	-	-	-	-
Unigene3520_Taxus	0	RawIntensity-ye	0.01	12.46	10.2831	7.94476e-13	8.03676e-12	-	-	-	-
Unigene13062_Taxus	0	RawIntensity-ye	0.01	11.88	10.2143	2.91078e-12	2.77743e-11	-	-	-	gi|493723|emb|CAA45523.1|/9e-07/photosystem I light-harvesting chlorophyll a/b-binding protein [Nicotiana tabacum]
Unigene16518_Taxus	0	RawIntensity-ye	0.01	11.88	10.2143	2.91078e-12	2.77596e-11	-	-	-	gi|93359564|gb|ABF13308.1|/8e-35/PP2c [Phaseolus vulgaris]
Unigene24440_Taxus	0	RawIntensity-ye	0.01	11.88	10.2143	2.91078e-12	2.77449e-11	-	-	-	-
Unigene791_Taxus	0	RawIntensity-ye	0.01	11.59	10.1787	5.57044e-12	5.16198e-11	-	-	-	gi|23197688|gb|AAN15371.1|/6e-12/serine/threonine kinase - like protein [Arabidopsis thaliana]
Unigene16709_Taxus	0	RawIntensity-ye	0.01	11.59	10.1787	5.57044e-12	5.15932e-11	-	-	-	-
Unigene20595_Taxus	0	RawIntensity-ye	0.01	11.59	10.1787	5.57044e-12	5.15667e-11	-	-	-	-
Unigene24163_Taxus	0	RawIntensity-ye	0.01	11.59	10.1787	5.57044e-12	5.15402e-11	-	-	-	-
Unigene36022_Taxus	0	RawIntensity-ye	0.01	11.59	10.1787	5.57044e-12	5.15137e-11	-	-	-	gi|24431602|gb|AAN61482.1|/1e-72/Hypothetical protein [Oryza sativa Japonica Group]
Unigene36129_Taxus	0	RawIntensity-ye	0.01	11.59	10.1787	5.57044e-12	5.14872e-11	-	-	-	gi|58430585|dbj|BAD89084.1|/3e-63/PpCOL1 [Physcomitrella patens] >gi|66841016|emb|CAI64583.1| CONSTANS-like 1 [Physcomitrella patens]
Unigene33608_Taxus	0	RawIntensity-ye	0.01	11.3	10.1421	1.06597e-11	9.61082e-11	-	-	-	gi|39636489|gb|AAR29057.1|/1e-107/glutamine synthetase 1 [Datisca glomerata]
Unigene20421_Taxus	0	RawIntensity-ye	0.01	11.3	10.1421	1.06597e-11	9.60601e-11	-	-	-	-
Unigene9080_Taxus	0	RawIntensity-ye	0.01	11.3	10.1421	1.06597e-11	9.6012e-11	-	-	-	gi|159486931|ref|XP_001701490.1|/1e-87/carbohydrate transporter [Chlamydomonas reinhardtii] >gi|158271672|gb|EDO97487.1| carbohydrate transporter [Chlamydomonas reinhardtii]
Unigene13709_Taxus	0	RawIntensity-ye	0.01	11.3	10.1421	1.06597e-11	9.5964e-11	-	-	-	gi|124359535|gb|ABD28651.2|/7e-07/Cystinosin/ERS1p repeat [Medicago truncatula]
Unigene22488_Taxus	0	RawIntensity-ye	0.01	11.3	10.1421	1.06597e-11	9.5916e-11	-	-	-	-
Unigene14263_Taxus	0	RawIntensity-ye	0.01	11.3	10.1421	1.06597e-11	9.5868e-11	-	-	-	gi|48431269|gb|AAT44124.1|/3e-61/F3H-like protein [Saussurea medusa]
Unigene13094_Taxus	0	RawIntensity-ye	0.01	11.3	10.1421	1.06597e-11	9.58202e-11	-	-	-	gi|115457370|ref|NP_001052285.1|/3e-40/Os04g0227200 [Oryza sativa (japonica cultivar-group)] >gi|38346024|emb|CAE01955.2| OSJNBb0071D01.1 [Oryza sativa (japonica cultivar-group)] >gi|38346892|emb|CAE03917.2| OSJNBb0015G09.11 [Oryza sativa (japonica cultivar-group)]
Unigene2326_Taxus	0	RawIntensity-ye	0.01	11.01	10.1046	2.03982e-11	1.76739e-10	-	-	-	gi|183238687|gb|ACC60973.1|/1e-116/beta-ketoacyl-CoA synthase [Helianthus annuus]
Unigene12825_Taxus	0	RawIntensity-ye	0.01	11.01	10.1046	2.03982e-11	1.76654e-10	-	-	-	gi|115475672|ref|NP_001061432.1|/1e-147/Os08g0276100 [Oryza sativa (japonica cultivar-group)] >gi|113623401|dbj|BAF23346.1| Os08g0276100 [Oryza sativa Japonica Group]
Unigene23555_Taxus	0	RawIntensity-ye	0.01	11.01	10.1046	2.03982e-11	1.76569e-10	-	-	-	gi|9759597|dbj|BAB11454.1|/2e-07/unnamed protein product [Arabidopsis thaliana]
Unigene3997_Taxus	0	RawIntensity-ye	0.01	10.72	10.0661	3.90326e-11	3.28239e-10	-	-	-	gi|4731376|gb|AAC05116.2|/1e-06/isoflavone reductase homolog Bet v 6.0101 [Betula pendula]
Unigene19070_Taxus	0	RawIntensity-ye	0.01	10.72	10.0661	3.90326e-11	3.28085e-10	-	-	-	-
Unigene20523_Taxus	0	RawIntensity-ye	0.01	10.72	10.0661	3.90326e-11	3.27932e-10	-	-	-	gi|255676562|dbj|BAF18193.2|/2e-08/Os05g0556300 [Oryza sativa Japonica Group]
Unigene31569_Taxus	0	RawIntensity-ye	0.01	10.43	10.0265	7.46898e-11	6.08198e-10	-	-	-	gi|115446429|ref|NP_001046994.1|/1e-06/Os02g0525600 [Oryza sativa (japonica cultivar-group)] >gi|113536525|dbj|BAF08908.1| Os02g0525600 [Oryza sativa Japonica Group]
Unigene22330_Taxus	0	RawIntensity-ye	0.01	10.43	10.0265	7.46898e-11	6.07923e-10	-	-	-	-
Unigene14121_Taxus	0	RawIntensity-ye	0.01	10.43	10.0265	7.46898e-11	6.07648e-10	-	-	-	-
Unigene14053_Taxus	0	RawIntensity-ye	0.01	10.14	9.98584	1.4292e-10	1.13005e-09	-	-	-	-
Unigene27252_Taxus	0	RawIntensity-ye	0.01	10.14	9.98584	1.4292e-10	1.12955e-09	-	-	-	-
Unigene30310_Taxus	0	RawIntensity-ye	0.01	10.14	9.98584	1.4292e-10	1.12906e-09	-	-	-	-
Unigene18064_Taxus	0	RawIntensity-ye	0.01	9.56	9.90087	5.23308e-10	3.93706e-09	-	-	-	-
Unigene36471_Taxus	0	RawIntensity-ye	0.01	9.56	9.90087	5.23308e-10	3.93542e-09	GO:0016020//membrane	GO:0016887//ATPase activity;GO:0005524//ATP binding	-	gi|224106201|ref|XP_002314083.1|/0.0/white-brown-complex ABC transporter family [Populus trichocarpa] >gi|222850491|gb|EEE88038.1| white-brown-complex ABC transporter family [Populus trichocarpa]
Unigene3277_Taxus	0	RawIntensity-ye	0.01	9.56	9.90087	5.23308e-10	3.93377e-09	-	-	-	gi|195611394|gb|ACG27527.1|/3e-16/NADH dehydrogenase I subunit N [Zea mays] >gi|195634885|gb|ACG36911.1| NADH dehydrogenase I subunit N [Zea mays]
Unigene19008_Taxus	0	RawIntensity-ye	0.01	9.56	9.90087	5.23308e-10	3.93213e-09	-	-	-	-
Unigene22308_Taxus	0	RawIntensity-ye	0.01	9.27	9.85643	1.00136e-09	7.30756e-09	-	-	-	-
Unigene3743_Taxus	0	RawIntensity-ye	0.01	9.27	9.85643	1.00136e-09	7.3046e-09	-	-	-	gi|62320102|dbj|BAD94280.1|/8e-17/adenylate kinase -like protein [Arabidopsis thaliana]
Unigene23608_Taxus	0	RawIntensity-ye	0.01	9.27	9.85643	1.00136e-09	7.30164e-09	-	-	-	-
Unigene18549_Taxus	0	RawIntensity-ye	0.01	9.27	9.85643	1.00136e-09	7.29868e-09	-	-	-	-
Unigene32421_Taxus	0	RawIntensity-ye	0.01	9.27	9.85643	1.00136e-09	7.29572e-09	-	-	-	-
Unigene36323_Taxus	0	RawIntensity-ye	0.01	9.27	9.85643	1.00136e-09	7.29277e-09	-	-	-	gi|70987454|ref|XP_749140.1|/5e-30/SacI domain and endonuclease/exonuclease/phosphatase family protein [Aspergillus fumigatus Af293] >gi|66846770|gb|EAL87102.1| SacI domain and endonuclease/exonuclease/phosphatase family protein [Aspergillus fumigatus Af293] >gi|159123088|gb|EDP48208.1| SacI domain and endonuclease/exonuclease/phosphatase family protein [Aspergillus fumigatus A1163]
Unigene8113_Taxus	0	RawIntensity-ye	0.01	9.27	9.85643	1.00136e-09	7.28982e-09	-	-	-	-
Unigene23266_Taxus	0	RawIntensity-ye	0.01	8.98	9.81057	1.91611e-09	1.35811e-08	-	-	-	-
Unigene34015_Taxus	0	RawIntensity-ye	0.01	8.98	9.81057	1.91611e-09	1.35757e-08	-	-	-	gi|115459646|ref|NP_001053423.1|/1e-29/Os04g0536300 [Oryza sativa (japonica cultivar-group)] >gi|122234702|sp|Q0JBF0.1|YAB5_ORYSJ RecName: Full=Protein YABBY 5; AltName: Full=OsYABBY5; AltName: Full=OsYAB3 >gi|160221316|sp|Q01JG2.2|YAB5_ORYSI RecName: Full=Protein YABBY 5; AltName: Full=OsYABBY5; AltName: Full=OsYAB3 >gi|113564994|dbj|BAF15337.1| Os04g0536300 [Oryza sativa Japonica Group] >gi|124…
Unigene4364_Taxus	0	RawIntensity-ye	0.01	8.98	9.81057	1.91611e-09	1.35704e-08	GO:0009536//plastid	-	-	gi|124300960|gb|ABN04732.1|/1e-08/At5g62140 [Arabidopsis thaliana]
Unigene16433_Taxus	0	RawIntensity-ye	0.01	8.98	9.81057	1.91611e-09	1.35651e-08	-	-	-	gi|4097573|gb|AAD09515.1|/1e-25/GMFP7 [Glycine max]
Unigene11375_Taxus	0	RawIntensity-ye	0.01	8.69	9.76321	3.66652e-09	2.5242e-08	-	-	-	gi|15220579|ref|NP_176957.1|/5e-59/phototropic-responsive NPH3 family protein [Arabidopsis thaliana] >gi|42572025|ref|NP_974103.1| phototropic-responsive NPH3 family protein [Arabidopsis thaliana] >gi|31711740|gb|AAP68226.1| At1g67900 [Arabidopsis thaliana]
Unigene36117_Taxus	0	RawIntensity-ye	0.01	8.69	9.76321	3.66652e-09	2.52324e-08	-	-	-	gi|2342564|emb|CAA74960.1|/1e-80/sedoheptulose-1,7-biphosphatase [Chlamydomonas reinhardtii]
Unigene33239_Taxus	0	RawIntensity-ye	0.01	8.69	9.76321	3.66652e-09	2.52227e-08	-	-	-	-
Unigene17970_Taxus	0	RawIntensity-ye	0.01	8.4	9.71425	7.01592e-09	4.69886e-08	-	-	-	gi|115440779|ref|NP_001044669.1|/1e-31/Os01g0825000 [Oryza sativa (japonica cultivar-group)] >gi|113534200|dbj|BAF06583.1| Os01g0825000 [Oryza sativa Japonica Group]
Unigene22891_Taxus	0	RawIntensity-ye	0.01	8.4	9.71425	7.01592e-09	4.69712e-08	-	-	-	-
Unigene28099_Taxus	0	RawIntensity-ye	0.01	8.11	9.66356	1.34251e-08	8.6563e-08	-	-	-	-
Unigene11040_Taxus	0	RawIntensity-ye	0.01	8.11	9.66356	1.34251e-08	8.6532e-08	-	GO:0005515//protein binding	-	gi|255670897|dbj|BAH91689.1|/7e-32/Os02g0472700 [Oryza sativa Japonica Group]
Unigene6046_Taxus	0	RawIntensity-ye	0.01	8.11	9.66356	1.34251e-08	8.6501e-08	-	-	-	-
Unigene23924_Taxus	0	RawIntensity-ye	0.01	8.11	9.66356	1.34251e-08	8.64701e-08	-	-	-	-
Unigene14664_Taxus	0	RawIntensity-ye	0.01	8.11	9.66356	1.34251e-08	8.64391e-08	-	-	-	-
Unigene18420_Taxus	0	RawIntensity-ye	0.01	8.11	9.66356	1.34251e-08	8.64082e-08	-	-	-	gi|116782253|gb|ABK22432.1|/5e-08/unknown [Picea sitchensis] >gi|116783467|gb|ABK22954.1| unknown [Picea sitchensis] >gi|116784816|gb|ABK23482.1| unknown [Picea sitchensis]
Unigene34549_Taxus	0	RawIntensity-ye	0.01	8.11	9.66356	1.34251e-08	8.63773e-08	-	-	-	gi|116779891|gb|ABK21464.1|/3e-08/unknown [Picea sitchensis]
Unigene2777_Taxus	0	RawIntensity-ye	0.01	7.82	9.61102	2.5689e-08	1.59855e-07	-	-	-	-
Unigene28449_Taxus	0	RawIntensity-ye	0.01	7.82	9.61102	2.5689e-08	1.59799e-07	-	-	-	gi|115444841|ref|NP_001046200.1|/2e-31/Os02g0197600 [Oryza sativa (japonica cultivar-group)]
Unigene22_Taxus	0	RawIntensity-ye	0.01	7.82	9.61102	2.5689e-08	1.59744e-07	-	-	-	gi|88900310|gb|ABD57467.1|/5e-10/At3g09950 [Arabidopsis thaliana]
Unigene20436_Taxus	0	RawIntensity-ye	0.01	7.82	9.61102	2.5689e-08	1.59689e-07	GO:0005886//plasma membrane	-	-	gi|255674178|dbj|BAH91978.1|/5e-35/Os03g0128900 [Oryza sativa Japonica Group]
Unigene6069_Taxus	0	RawIntensity-ye	0.01	7.53	9.55651	4.91562e-08	2.94577e-07	-	-	-	gi|49656394|emb|CAG89065.1|/2e-12/DEHA2F08382p [Debaryomyces hansenii]
Unigene17152_Taxus	0	RawIntensity-ye	0.01	7.53	9.55651	4.91562e-08	2.94479e-07	-	-	-	gi|18404409|ref|NP_565860.1|/3e-07/chloroplast lumen common family protein [Arabidopsis thaliana] >gi|4056493|gb|AAC98059.1| chloroplast lumen common protein family [Arabidopsis thaliana] >gi|114050659|gb|ABI49479.1| At2g37400 [Arabidopsis thaliana]
Unigene12831_Taxus	0	RawIntensity-ye	0.01	7.24	9.49985	9.40612e-08	5.40807e-07	-	-	-	gi|224589590|gb|ACN59328.1|/0.0/leucine-rich repeat receptor-like protein kinase [Arabidopsis thaliana]
Unigene19074_Taxus	0	RawIntensity-ye	0.01	7.24	9.49985	9.40612e-08	5.40634e-07	-	-	-	gi|5734442|emb|CAB52690.1|/1e-16/hexose transporter [Solanum lycopersicum]
Unigene4700_Taxus	0	RawIntensity-ye	0.01	7.24	9.49985	9.40612e-08	5.40461e-07	-	-	-	-
Unigene17540_Taxus	0	RawIntensity-ye	0.01	7.24	9.49985	9.40612e-08	5.40289e-07	-	-	-	gi|224286517|gb|ACN40965.1|/6e-07/unknown [Picea sitchensis]
Unigene15128_Taxus	0	RawIntensity-ye	0.01	7.24	9.49985	9.40612e-08	5.40117e-07	-	-	-	gi|226499042|ref|NP_001150572.1|/2e-18/RING-H2 finger protein ATL1R [Zea mays] >gi|195640284|gb|ACG39610.1| RING-H2 finger protein ATL1R [Zea mays]
Unigene4015_Taxus	0	RawIntensity-ye	0.01	6.95	9.44087	1.79987e-07	9.93575e-07	-	-	-	gi|109631200|gb|ABG35776.1|/3e-13/SRR380 [Striga asiatica]
Unigene31969_Taxus	0	RawIntensity-ye	0.01	6.66	9.37938	3.44408e-07	1.83916e-06	-	-	-	gi|226499062|ref|NP_001147592.1|/9e-06/LOC100281201 [Zea mays] >gi|195612388|gb|ACG28024.1| RPT2-like protein [Zea mays]
Unigene17486_Taxus	0	RawIntensity-ye	0.01	6.66	9.37938	3.44408e-07	1.83861e-06	-	-	-	gi|115477356|ref|NP_001062274.1|/4e-21/Os08g0521300 [Oryza sativa (japonica cultivar-group)] >gi|113624243|dbj|BAF24188.1| Os08g0521300 [Oryza sativa Japonica Group]
Unigene7639_Taxus	0	RawIntensity-ye	0.01	6.66	9.37938	3.44408e-07	1.83807e-06	-	-	-	gi|12003380|gb|AAG43547.1|AF211529_1/2e-17/Avr9/Cf-9 rapidly elicited protein 31 [Nicotiana tabacum]
Unigene25284_Taxus	0	RawIntensity-ye	0.01	6.66	9.37938	3.44408e-07	1.83752e-06	-	-	-	-
Unigene15488_Taxus	0	RawIntensity-ye	0.01	6.66	9.37938	3.44408e-07	1.83698e-06	-	-	-	-
Unigene26014_Taxus	0	RawIntensity-ye	0.01	6.37	9.31515	6.5903e-07	3.38854e-06	-	-	-	-
Unigene23066_Taxus	0	RawIntensity-ye	0.01	6.37	9.31515	6.5903e-07	3.38758e-06	-	-	-	-
Unigene2402_Taxus	0	RawIntensity-ye	0.01	6.37	9.31515	6.5903e-07	3.38661e-06	GO:0009536//plastid	GO:0046872//metal ion binding;GO:0016838//carbon-oxygen lyase activity, acting on phosphates	-	gi|62511233|sp|Q9M7C9.1|TPSDB_ABIGR/1e-23/RecName: Full=Limonene/alpha-pinene synthase, chloroplastic; AltName: Full=(-)-(4S)-limonene synthase; AltName: Full=(-)-(1S,5S)-alpha-pinene synthase; AltName: Full=Agg-pin2; Flags: Precursor >gi|7381253|gb|AAF61455.1|AF139207_1 (-)-limonene/(-)-alpha-pinene synthase [Abies grandis]
Unigene31168_Taxus	0	RawIntensity-ye	0.01	6.37	9.31515	6.5903e-07	3.38564e-06	-	-	-	-
Unigene15014_Taxus	0	RawIntensity-ye	0.01	6.37	9.31515	6.5903e-07	3.38468e-06	-	-	-	-
Unigene7506_Taxus	0	RawIntensity-ye	0.01	6.37	9.31515	6.5903e-07	3.38371e-06	-	-	-	gi|225016149|gb|ACN78973.1|/4e-16/copia-type polyprotein [Glycine max] >gi|225016157|gb|ACN78980.1| copia-type polyprotein [Glycine max]
Unigene29613_Taxus	0	RawIntensity-ye	0.01	6.37	9.31515	6.5903e-07	3.38274e-06	GO:0005739//mitochondrion;GO:0009570//chloroplast stroma	-	-	gi|115474965|ref|NP_001061079.1|/5e-43/Os08g0167500 [Oryza sativa (japonica cultivar-group)] >gi|113623048|dbj|BAF22993.1| Os08g0167500 [Oryza sativa Japonica Group]
Unigene9074_Taxus	0	RawIntensity-ye	0.01	6.37	9.31515	6.5903e-07	3.38178e-06	-	-	-	-
Unigene15596_Taxus	0	RawIntensity-ye	0.01	6.08	9.24793	1.26106e-06	6.22438e-06	-	-	-	gi|49355348|gb|AAT65206.1|/1e-112/fatty acid elongase 3-ketoacyl-CoA synthase [Brassica napus]
Unigene36305_Taxus	0	RawIntensity-ye	0.01	6.08	9.24793	1.26106e-06	6.22267e-06	-	-	-	gi|195633101|gb|ACG36734.1|/2e-24/hydrolase, alpha/beta fold family protein [Zea mays]
Unigene14471_Taxus	0	RawIntensity-ye	0.01	6.08	9.24793	1.26106e-06	6.22096e-06	-	GO:0046872//metal ion binding	-	gi|224096760|ref|XP_002334672.1|/3e-16/cytochrome P450 [Populus trichocarpa] >gi|222874188|gb|EEF11319.1| cytochrome P450 [Populus trichocarpa]
Unigene27635_Taxus	0	RawIntensity-ye	0.01	6.08	9.24793	1.26106e-06	6.21926e-06	-	-	-	-
Unigene32813_Taxus	0	RawIntensity-ye	0.01	6.08	9.24793	1.26106e-06	6.21755e-06	-	-	-	gi|115446433|ref|NP_001046996.1|/2e-12/Os02g0526000 [Oryza sativa (japonica cultivar-group)] >gi|113536527|dbj|BAF08910.1| Os02g0526000 [Oryza sativa Japonica Group]
Unigene35675_Taxus	0	RawIntensity-ye	0.01	6.08	9.24793	1.26106e-06	6.21585e-06	-	-	-	gi|116780545|gb|ABK21717.1|/2e-92/unknown [Picea sitchensis]
Unigene27742_Taxus	0	RawIntensity-ye	0.01	6.08	9.24793	1.26106e-06	6.21415e-06	-	-	-	-
Unigene33340_Taxus	0	RawIntensity-ye	0.01	6.08	9.24793	1.26106e-06	6.21245e-06	-	-	-	gi|62511183|sp|O81086.1|TPSD1_ABIGR/2e-18/RecName: Full=Alpha-bisabolene synthase; AltName: Full=(E)-alpha-bisabolene synthase; AltName: Full=AgfEabis >gi|3252840|gb|AAC24192.1| E-alpha-bisabolene synthase [Abies grandis]
Unigene35449_Taxus	0	RawIntensity-ye	0.01	5.79	9.17742	2.41306e-06	1.14217e-05	-	-	-	gi|17433068|sp|Q9M9B3.1|COL8_ARATH/7e-14/RecName: Full=Zinc finger protein CONSTANS-LIKE 8 >gi|7770330|gb|AAF69700.1|AC016041_5 F27J15.10 [Arabidopsis thaliana]
Unigene31388_Taxus	0	RawIntensity-ye	0.01	5.79	9.17742	2.41306e-06	1.14187e-05	-	-	-	-
Unigene23037_Taxus	0	RawIntensity-ye	0.01	5.79	9.17742	2.41306e-06	1.14157e-05	-	-	-	-
Unigene2181_Taxus	0	RawIntensity-ye	0.01	5.79	9.17742	2.41306e-06	1.14127e-05	-	-	-	gi|55776199|gb|AAV65286.1|/4e-14/bark protein-like protein [Thuja occidentalis]
Unigene16_Taxus	0	RawIntensity-ye	0.01	5.5	9.10329	4.61742e-06	2.09466e-05	-	-	-	-
Unigene7169_Taxus	0	RawIntensity-ye	0.01	5.5	9.10329	4.61742e-06	2.09413e-05	-	-	-	gi|15233393|ref|NP_192888.1|/4e-63/protein kinase family protein [Arabidopsis thaliana] >gi|75334855|sp|Q9LDN1.1|CRK33_ARATH RecName: Full=Putative cysteine-rich receptor-like protein kinase 33; Short=Cysteine-rich RLK33; Flags: Precursor >gi|7267849|emb|CAB78192.1| serine/threonine kinase-like protein [Arabidopsis thaliana] >gi|7321046|emb|CAB82154.1| serine/threonine kinase-like protein [Arabid…
Unigene8509_Taxus	0	RawIntensity-ye	0.01	5.5	9.10329	4.61742e-06	2.0936e-05	-	-	-	-
Unigene7768_Taxus	0	RawIntensity-ye	0.01	5.5	9.10329	4.61742e-06	2.09308e-05	-	-	-	-
Unigene14138_Taxus	0	RawIntensity-ye	0.01	5.5	9.10329	4.61742e-06	2.09255e-05	-	-	-	gi|225451615|ref|XP_002275754.1|/2e-13/PREDICTED: similar to SUVH4 (SU(VAR)3-9 HOMOLOG 4) [Vitis vinifera]
Unigene15578_Taxus	0	RawIntensity-ye	0.01	5.5	9.10329	4.61742e-06	2.09202e-05	-	-	-	gi|3152598|gb|AAC17079.1|/8e-06/Contains similarity to C2-HC type zinc finger protein C.e-MyT1 gb|U67079 from C. elegans and to hypersensitivity-related gene 201 isolog T28M21.14 from A. thaliana BAC gb|AF002109 [Arabidopsis thaliana]
Unigene28110_Taxus	0	RawIntensity-ye	0.01	5.21	9.02514	8.8355e-06	3.81487e-05	-	-	-	-
Unigene16702_Taxus	0	RawIntensity-ye	0.01	5.21	9.02514	8.8355e-06	3.81395e-05	-	-	-	-
Unigene19015_Taxus	0	RawIntensity-ye	0.01	5.21	9.02514	8.8355e-06	3.81304e-05	-	-	-	gi|186509871|ref|NP_187362.3|/6e-12/emb1974 (embryo defective 1974) [Arabidopsis thaliana]
Unigene880_Taxus	0	RawIntensity-ye	0.01	5.21	9.02514	8.8355e-06	3.81212e-05	-	-	-	-
Unigene23601_Taxus	0	RawIntensity-ye	0.01	5.21	9.02514	8.8355e-06	3.81121e-05	-	-	-	-
Unigene10512_Taxus	0	RawIntensity-ye	0.01	5.21	9.02514	8.8355e-06	3.8103e-05	-	-	-	-
Unigene26808_Taxus	0	RawIntensity-ye	0.01	5.21	9.02514	8.8355e-06	3.80938e-05	-	-	-	-
Unigene19376_Taxus	0	RawIntensity-ye	0.01	4.92	8.94251	1.69068e-05	6.96396e-05	-	-	-	gi|51536066|dbj|BAD38192.1|/8e-06/mitochondrial transcription termination factor-like [Oryza sativa Japonica Group] >gi|255676842|dbj|BAH93396.1| Os06g0224600 [Oryza sativa Japonica Group]
Unigene32999_Taxus	0	RawIntensity-ye	0.01	4.92	8.94251	1.69068e-05	6.96237e-05	-	-	-	gi|186517875|ref|NP_680778.2|/2e-06/peptidase [Arabidopsis thaliana] >gi|30102562|gb|AAP21199.1| At4g40042 [Arabidopsis thaliana]
Unigene28791_Taxus	0	RawIntensity-ye	0.01	4.92	8.94251	1.69068e-05	6.96078e-05	-	-	-	gi|115439941|ref|NP_001044250.1|/4e-21/Os01g0750000 [Oryza sativa (japonica cultivar-group)] >gi|14209558|dbj|BAB56054.1| GTP-binding protein GTP1 [Oryza sativa Japonica Group] >gi|32966065|gb|AAP92129.1| GTP-binding protein GTP1 [Oryza sativa] >gi|113533781|dbj|BAF06164.1| Os01g0750000 [Oryza sativa Japonica Group]
Unigene11277_Taxus	0	RawIntensity-ye	0.01	4.92	8.94251	1.69068e-05	6.95918e-05	-	-	-	-
Unigene6791_Taxus	0	RawIntensity-ye	0.01	4.92	8.94251	1.69068e-05	6.95759e-05	-	-	-	gi|115468786|ref|NP_001057992.1|/2e-08/Os06g0597900 [Oryza sativa (japonica cultivar-group)] >gi|50725456|dbj|BAD32927.1| SOUL heme-binding protein-like [Oryza sativa Japonica Group] >gi|50725582|dbj|BAD33050.1| SOUL heme-binding protein-like [Oryza sativa Japonica Group] >gi|113596032|dbj|BAF19906.1| Os06g0597900 [Oryza sativa Japonica Group]
Unigene28659_Taxus	0	RawIntensity-ye	0.01	4.92	8.94251	1.69068e-05	6.956e-05	-	-	-	gi|22326868|ref|NP_197269.2|/9e-16/hydrolase, acting on ester bonds [Arabidopsis thaliana] >gi|17065370|gb|AAL32839.1| Unknown protein [Arabidopsis thaliana]
Unigene18003_Taxus	0	RawIntensity-ye	0.01	4.92	8.94251	1.69068e-05	6.95441e-05	-	-	-	-
Unigene15120_Taxus	0	RawIntensity-ye	0.01	4.63	8.85487	3.23514e-05	0.00012673	-	-	-	-
Unigene5598_Taxus	0	RawIntensity-ye	0.01	4.63	8.85487	3.23514e-05	0.000126702	-	-	-	-
Unigene17528_Taxus	0	RawIntensity-ye	0.01	4.63	8.85487	3.23514e-05	0.000126674	-	-	-	gi|57908057|gb|AAW59164.1|/8e-12/dehydrin 2 [Pinus taeda] >gi|57908059|gb|AAW59165.1| dehydrin 2 [Pinus taeda] >gi|57908061|gb|AAW59166.1| dehydrin 2 [Pinus taeda] >gi|57908063|gb|AAW59167.1| dehydrin 2 [Pinus taeda] >gi|57908067|gb|AAW59169.1| dehydrin 2 [Pinus taeda] >gi|57908069|gb|AAW59170.1| dehydrin 2 [Pinus taeda] >gi|57908071|gb|AAW59171.1| dehydrin 2 [Pinus taeda] >gi|57908073|gb|AAW5917…
Unigene15636_Taxus	0	RawIntensity-ye	0.01	4.63	8.85487	3.23514e-05	0.000126647	-	-	-	gi|57863814|gb|AAW56867.1|/1e-48/unkown protein [Oryza sativa Japonica Group] >gi|255676450|dbj|BAH93196.1| Os05g0481100 [Oryza sativa Japonica Group]
Unigene7125_Taxus	0	RawIntensity-ye	0.01	4.63	8.85487	3.23514e-05	0.000126619	-	-	-	gi|37572921|dbj|BAC98515.1|/1e-34/nodulin-like protein [Oryza sativa Japonica Group] >gi|37573021|dbj|BAC98533.1| nodulin-like protein [Oryza sativa Japonica Group]
Unigene35579_Taxus	0	RawIntensity-ye	0.01	4.63	8.85487	3.23514e-05	0.000126592	-	-	-	gi|226506232|ref|NP_001150750.1|/8e-19/3Fe-4S ferredoxin [Zea mays] >gi|195641484|gb|ACG40210.1| 3Fe-4S ferredoxin [Zea mays]
Unigene9147_Taxus	0	RawIntensity-ye	0.01	4.63	8.85487	3.23514e-05	0.000126564	-	-	-	-
Unigene11589_Taxus	0	RawIntensity-ye	0.01	4.63	8.85487	3.23514e-05	0.000126537	-	-	-	-
Unigene14756_Taxus	0	RawIntensity-ye	0.01	4.63	8.85487	3.23514e-05	0.000126509	-	-	-	-
Unigene8687_Taxus	0	RawIntensity-ye	0.01	4.63	8.85487	3.23514e-05	0.000126482	-	-	-	gi|226529069|ref|NP_001147637.1|/8e-23/transcription factor HY5 [Zea mays] >gi|195612764|gb|ACG28212.1| transcription factor HY5 [Zea mays]
Unigene32376_Taxus	0	RawIntensity-ye	0.01	4.63	8.85487	3.23514e-05	0.000126454	-	-	-	gi|168020057|ref|XP_001762560.1|/6e-36/predicted protein [Physcomitrella patens subsp. patens] >gi|162686293|gb|EDQ72683.1| predicted protein [Physcomitrella patens subsp. patens]
Unigene22552_Taxus	0	RawIntensity-ye	0.01	4.63	8.85487	3.23514e-05	0.000126427	-	-	-	-
Unigene33268_Taxus	0	RawIntensity-ye	0.01	4.63	8.85487	3.23514e-05	0.000126399	-	-	-	gi|30102564|gb|AAP21200.1|/5e-07/At3g19660 [Arabidopsis thaliana]
Unigene18174_Taxus	0	RawIntensity-ye	0.01	4.63	8.85487	3.23514e-05	0.000126372	-	-	-	gi|18424977|ref|NP_569016.1|/5e-06/hydroxyproline-rich glycoprotein family protein [Arabidopsis thaliana] >gi|75180377|sp|Q9LSK9.1|Y5566_ARATH RecName: Full=Uncharacterized protein At5g65660 >gi|30102568|gb|AAP21202.1| At5g65660 [Arabidopsis thaliana]
Unigene32701_Taxus	0	RawIntensity-ye	0.01	4.63	8.85487	3.23514e-05	0.000126345	-	-	-	gi|159486815|ref|XP_001701432.1|/5e-07/SOUL heme-binding protein [Chlamydomonas reinhardtii] >gi|158271614|gb|EDO97429.1| SOUL heme-binding protein [Chlamydomonas reinhardtii]
Unigene34394_Taxus	0	RawIntensity-ye	0.01	4.63	8.85487	3.23514e-05	0.000126317	-	-	-	gi|255561209|ref|XP_002521616.1|/5e-06/RING-H2 finger protein ATL3F, putative [Ricinus communis] >gi|223539171|gb|EEF40765.1| RING-H2 finger protein ATL3F, putative [Ricinus communis]
Unigene19537_Taxus	6	RawIntensity-ye	1.9	873.68	8.84496	1.22476e-05	5.18971e-05	-	-	-	-
Unigene7071_Taxus	0	RawIntensity-ye	0.01	4.35	8.76487	6.1905e-05	0.000231465	-	-	-	gi|189095405|ref|YP_001936418.1|/2e-07/c-type cytochrome biogenensis protein [Heterosigma akashiwo] >gi|223635072|sp|B2XTC6.1|CCS1_HETA2 RecName: Full=Cytochrome c biogenesis protein ccs1 >gi|157694748|gb|ABV66024.1| ResB-like protein [Heterosigma akashiwo]
Unigene23211_Taxus	0	RawIntensity-ye	0.01	4.35	8.76487	6.1905e-05	0.000231417	-	-	-	gi|115438152|ref|NP_001043470.1|/9e-08/Os01g0595600 [Oryza sativa (japonica cultivar-group)] >gi|20521314|dbj|BAB91828.1| hydrolase-like [Oryza sativa Japonica Group] >gi|20804634|dbj|BAB92324.1| hydrolase-like [Oryza sativa Japonica Group] >gi|113533001|dbj|BAF05384.1| Os01g0595600 [Oryza sativa Japonica Group]
Unigene2635_Taxus	0	RawIntensity-ye	0.01	4.35	8.76487	6.1905e-05	0.000231369	GO:0009536//plastid	-	-	gi|254567113|ref|XP_002490667.1|/3e-78/Mitochondrial leucyl-tRNA synthetase [Pichia pastoris GS115] >gi|238030463|emb|CAY68387.1| Mitochondrial leucyl-tRNA synthetase [Pichia pastoris GS115]
Unigene12524_Taxus	0	RawIntensity-ye	0.01	4.35	8.76487	6.1905e-05	0.000231321	-	-	-	gi|115457876|ref|NP_001052538.1|/3e-33/Os04g0353600 [Oryza sativa (japonica cultivar-group)]
Unigene4279_Taxus	0	RawIntensity-ye	0.01	4.35	8.76487	6.1905e-05	0.000231273	-	-	-	-
Unigene30545_Taxus	0	RawIntensity-ye	0.01	4.35	8.76487	6.1905e-05	0.000231225	-	-	-	gi|224813796|gb|ACN65116.1|/2e-19/2-alkenal reductase [Artemisia annua]
Unigene21790_Taxus	0	RawIntensity-ye	0.01	4.35	8.76487	6.1905e-05	0.000231177	-	-	-	-
Unigene7082_Taxus	0	RawIntensity-ye	0.01	4.35	8.76487	6.1905e-05	0.000231129	-	-	-	-
Unigene22999_Taxus	0	RawIntensity-ye	0.01	4.06	8.66534	0.000118456	0.000415462	-	-	-	-
Unigene14282_Taxus	0	RawIntensity-ye	0.01	4.06	8.66534	0.000118456	0.000415381	-	-	-	-
Unigene18586_Taxus	0	RawIntensity-ye	0.01	4.06	8.66534	0.000118456	0.0004153	-	-	-	gi|12247470|gb|AAG49896.1|/1e-06/PnFL-2 [Ipomoea nil]
Unigene3188_Taxus	0	RawIntensity-ye	0.01	4.06	8.66534	0.000118456	0.000415219	-	-	-	gi|254564815|ref|XP_002489518.1|/2e-09/One of several homologs of bacterial chaperone DnaJ, located in the ER lumen [Pichia pastoris GS115] >gi|238029314|emb|CAY67237.1| One of several homologs of bacterial chaperone DnaJ, located in the ER lumen [Pichia pastoris GS115]
Unigene14217_Taxus	0	RawIntensity-ye	0.01	4.06	8.66534	0.000118456	0.000415138	-	-	-	gi|116782623|gb|ABK22579.1|/7e-11/unknown [Picea sitchensis]
Unigene29700_Taxus	0	RawIntensity-ye	0.01	4.06	8.66534	0.000118456	0.000415057	-	-	-	-
Unigene15323_Taxus	0	RawIntensity-ye	0.01	4.06	8.66534	0.000118456	0.000414976	-	-	-	-
Unigene24524_Taxus	0	RawIntensity-ye	0.01	4.06	8.66534	0.000118456	0.000414896	-	-	-	-
Unigene13285_Taxus	0	RawIntensity-ye	0.01	4.06	8.66534	0.000118456	0.000414815	-	-	-	-
Unigene4615_Taxus	0	RawIntensity-ye	0.01	4.06	8.66534	0.000118456	0.000414734	-	-	-	gi|115487254|ref|NP_001066114.1|/2e-11/Os12g0138600 [Oryza sativa (japonica cultivar-group)] >gi|113648621|dbj|BAF29133.1| Os12g0138600 [Oryza sativa Japonica Group]
Unigene29422_Taxus	0	RawIntensity-ye	0.01	4.06	8.66534	0.000118456	0.000414654	-	-	-	-
Unigene32443_Taxus	0	RawIntensity-ye	0.01	4.06	8.66534	0.000118456	0.000414573	-	-	-	-
Unigene8814_Taxus	0	RawIntensity-ye	0.01	4.06	8.66534	0.000118456	0.000414492	-	-	-	gi|212724720|gb|ACJ37795.1|/2e-16/dehydrin 9 protein [Pinus sylvestris] >gi|212724740|gb|ACJ37805.1| dehydrin 9 protein [Pinus sylvestris] >gi|212724774|gb|ACJ37822.1| dehydrin 9 protein [Pinus sylvestris]
Unigene26046_Taxus	0	RawIntensity-ye	0.01	4.06	8.66534	0.000118456	0.000414412	-	-	-	gi|21537233|gb|AAM61574.1|/6e-06/EDGP precursor [Arabidopsis thaliana]
Unigene29802_Taxus	0	RawIntensity-ye	0.01	4.06	8.66534	0.000118456	0.000414331	GO:0009536//plastid	-	GO:0006350//transcription	gi|38260696|gb|AAR15507.1|/3e-18/scarecrow-like 23 [Zea mays]
Unigene33930_Taxus	0	RawIntensity-ye	0.01	4.06	8.66534	0.000118456	0.000414251	-	-	-	-
Unigene22560_Taxus	0	RawIntensity-ye	0.01	4.06	8.66534	0.000118456	0.00041417	-	-	-	-
Unigene25_Taxus	3	RawIntensity-ye	0.95	381.51	8.64958	6.40072e-05	0.000235316	-	-	-	gi|2267595|gb|AAB63590.1|/1e-34/plastocyanin precursor [Oryza sativa Indica Group]
Unigene25970_Taxus	0	RawIntensity-ye	0.01	3.77	8.55842	0.000226668	0.000755672	-	-	-	gi|168020057|ref|XP_001762560.1|/1e-27/predicted protein [Physcomitrella patens subsp. patens] >gi|162686293|gb|EDQ72683.1| predicted protein [Physcomitrella patens subsp. patens]
Unigene310_Taxus	0	RawIntensity-ye	0.01	3.77	8.55842	0.000226668	0.000755532	-	-	-	-
Unigene13834_Taxus	0	RawIntensity-ye	0.01	3.77	8.55842	0.000226668	0.000755392	-	-	-	-
Unigene23703_Taxus	0	RawIntensity-ye	0.01	3.77	8.55842	0.000226668	0.000755252	-	-	-	-
Unigene6265_Taxus	0	RawIntensity-ye	0.01	3.77	8.55842	0.000226668	0.000755112	-	-	-	-
Unigene11341_Taxus	0	RawIntensity-ye	0.01	3.77	8.55842	0.000226668	0.000754973	-	-	-	gi|195614468|gb|ACG29064.1|/2e-67/cytochrome P450 CYP90B14v1 [Zea mays]
Unigene26219_Taxus	0	RawIntensity-ye	0.01	3.77	8.55842	0.000226668	0.000754833	GO:0016023//cytoplasmic membrane-bounded vesicle	GO:0030145//manganese ion binding;GO:0009045//xylose isomerase activity;GO:0000287//magnesium ion binding	GO:0042732//D-xylose metabolic process;GO:0006098//pentose-phosphate shunt	gi|62319619|dbj|BAD95103.1|/2e-06/xylose isomerase [Arabidopsis thaliana]
Unigene16840_Taxus	0	RawIntensity-ye	0.01	3.77	8.55842	0.000226668	0.000754693	-	-	-	-
Unigene7859_Taxus	0	RawIntensity-ye	0.01	3.77	8.55842	0.000226668	0.000754554	-	-	-	gi|15241300|ref|NP_197525.1|/8e-09/DIN10 (DARK INDUCIBLE 10); hydrolase, hydrolyzing O-glycosyl compounds [Arabidopsis thaliana] >gi|79328212|ref|NP_001031910.1| DIN10 (DARK INDUCIBLE 10); hydrolase, hydrolyzing O-glycosyl compounds [Arabidopsis thaliana] >gi|79598832|ref|NP_851044.2| DIN10 (DARK INDUCIBLE 10); hydrolase, hydrolyzing O-glycosyl compounds [Arabidopsis thaliana] >gi|269969643|sp|Q8…
Unigene31820_Taxus	0	RawIntensity-ye	0.01	3.77	8.55842	0.000226668	0.000754414	-	-	-	gi|33641704|gb|AAQ24337.1|/3e-13/O-methyltransferase [Zea mays] >gi|33641728|gb|AAQ24349.1| O-methyltransferase [Zea mays] >gi|33641734|gb|AAQ24352.1| O-methyltransferase [Zea mays] >gi|33641764|gb|AAQ24367.1| O-methyltransferase [Zea mays] >gi|33641768|gb|AAQ24369.1| O-methyltransferase [Zea mays]
Unigene24115_Taxus	0	RawIntensity-ye	0.01	3.77	8.55842	0.000226668	0.000754275	-	-	-	-
Unigene3805_Taxus	0	RawIntensity-ye	0.01	3.77	8.55842	0.000226668	0.000754135	-	-	-	gi|68342448|gb|AAY90122.1|/8e-16/basic helix-loop-helix transcription factor protein [Rheum australe]
Unigene1588_Taxus	0	RawIntensity-ye	0.01	3.77	8.55842	0.000226668	0.000753996	-	-	-	-
Unigene15507_Taxus	0	RawIntensity-ye	0.01	3.77	8.55842	0.000226668	0.000753856	-	-	-	gi|29028856|gb|AAO64807.1|/3e-33/At5g22340 [Arabidopsis thaliana]
Unigene15243_Taxus	0	RawIntensity-ye	0.01	3.77	8.55842	0.000226668	0.000753717	-	-	-	-
Unigene33423_Taxus	0	RawIntensity-ye	0.01	3.77	8.55842	0.000226668	0.000753578	GO:0009536//plastid	GO:0003676//nucleic acid binding	-	gi|2443390|dbj|BAA22411.1|/5e-40/Ps16 protein [Triticum aestivum]
Unigene23603_Taxus	12	RawIntensity-ye	3.81	1342.09	8.46047	2.76512e-07	1.49298e-06	-	-	-	-
Unigene28790_Taxus	3	RawIntensity-ye	0.95	244.2	8.00592	6.40072e-05	0.000235798	-	-	-	gi|115456367|ref|NP_001051784.1|/1e-16/Os03g0830200 [Oryza sativa (japonica cultivar-group)] >gi|108711900|gb|ABF99695.1| expressed protein [Oryza sativa (japonica cultivar-group)] >gi|113550255|dbj|BAF13698.1| Os03g0830200 [Oryza sativa Japonica Group]
Unigene19243_Taxus	12	RawIntensity-ye	3.81	826.46	7.76101	2.76512e-07	1.49119e-06	-	-	-	gi|2326677|emb|CAA86613.1|/2e-37/late embryogenesis (Lea)-like protein [Solanum lycopersicum]
Unigene27830_Taxus	4	RawIntensity-ye	1.27	247.39	7.60581	3.81388e-05	0.000147601	-	-	-	gi|225431926|ref|XP_002277169.1|/4e-26/PREDICTED: class I beta-1,3-glucanase [Vitis vinifera] >gi|22550395|gb|AAF44667.2|AF239617_1 beta-1,3-glucanase [Vitis vinifera]
Unigene17380_Taxus	2	RawIntensity-ye	0.63	118.77	7.5586	0.000105735	0.000375899	-	-	-	gi|170104350|ref|XP_001883389.1|/1e-113/fructose-1,6-bisphosphatase [Laccaria bicolor S238N-H82] >gi|164641842|gb|EDR06101.1| fructose-1,6-bisphosphatase [Laccaria bicolor S238N-H82]
Unigene27377_Taxus	2	RawIntensity-ye	0.63	113.84	7.49744	0.000105735	0.000376196	-	-	-	gi|226528359|ref|NP_001151155.1|/8e-06/thioredoxin-like 5 [Zea mays] >gi|195644684|gb|ACG41810.1| thioredoxin-like 5 [Zea mays]
Unigene24704_Taxus	4	RawIntensity-ye	1.27	223.92	7.46201	3.81388e-05	0.00014719	-	-	-	-
Unigene34230_Taxus	9	RawIntensity-ye	2.85	427.57	7.22905	1.92748e-06	9.24983e-06	-	-	-	-
Unigene13464_Taxus	5	RawIntensity-ye	1.59	195.24	6.94008	2.191e-05	8.87646e-05	-	-	-	gi|148905856|gb|ABR16090.1|/6e-19/unknown [Picea sitchensis]
Unigene33582_Taxus	9	RawIntensity-ye	2.85	334.58	6.87525	1.92748e-06	9.27704e-06	-	-	-	gi|115433990|ref|NP_001041753.1|/5e-17/Os01g0102900 [Oryza sativa (japonica cultivar-group)] >gi|417260|sp|Q03200|LIRP1_ORYSJ Light-regulated protein precursor >gi|20804448|dbj|BAB92145.1| light-regulated protein [Oryza sativa Japonica Group] >gi|113531284|dbj|BAF03667.1| Os01g0102900 [Oryza sativa Japonica Group]
Unigene18413_Taxus	6	RawIntensity-ye	1.9	202.78	6.73777	1.22476e-05	5.1946e-05	-	-	-	-
Unigene31293_Taxus	14	RawIntensity-ye	4.44	468.99	6.72285	7.34918e-08	4.31082e-07	-	-	-	gi|131176|sp|P13194.2|PSAE_HORVU/4e-23/RecName: Full=Photosystem I reaction center subunit IV, chloroplastic; Short=PSI-E; AltName: Full=Photosystem I 10.8 kDa polypeptide; Flags: Precursor >gi|226163|prf||1413233A 10.8kD photosystem I protein
Unigene35716_Taxus	3	RawIntensity-ye	0.95	97.91	6.68738	6.40072e-05	0.000235943	-	-	-	gi|6018089|gb|AAF01765.1|AF184278_1/2e-28/homeodomain-leucine zipper protein 57 [Glycine max]
Unigene11761_Taxus	5	RawIntensity-ye	1.59	163.09	6.6805	2.191e-05	8.88246e-05	-	GO:0016705//oxidoreductase activity, acting on paired donors, with incorporation or reduction of molecular oxygen	GO:0016117//carotenoid biosynthetic process	gi|115437908|ref|NP_001043410.1|/7e-15/Os01g0581300 [Oryza sativa (japonica cultivar-group)] >gi|113532941|dbj|BAF05324.1| Os01g0581300 [Oryza sativa Japonica Group]
Unigene27491_Taxus	5	RawIntensity-ye	1.59	156.43	6.62035	2.191e-05	8.87446e-05	-	-	-	gi|226531442|ref|NP_001148258.1|/8e-06/phosphoribulokinase [Zea mays] >gi|195617000|gb|ACG30330.1| phosphoribulokinase [Zea mays]
Unigene1142_Taxus	2	RawIntensity-ye	0.63	61.12	6.60015	0.000105735	0.000374641	GO:0016023//cytoplasmic membrane-bounded vesicle	-	-	gi|1708971|sp|P52706.1|MDL1_PRUSE/7e-64/RecName: Full=(R)-mandelonitrile lyase 1; AltName: Full=Hydroxynitrile lyase 1; Short=(R)-oxynitrilase 1; Flags: Precursor >gi|288116|emb|CAA51194.1| mandelonitrile lyase [Prunus serotina] >gi|1730332|gb|AAB38536.1| (R)-(+)-mandelonitrile lyase isoform MDL1 precursor [Prunus serotina] >gi|1090776|prf||2019441A mandelonitrile lyase
Unigene33026_Taxus	6	RawIntensity-ye	1.9	177.57	6.54624	1.22476e-05	5.19828e-05	-	-	-	gi|38261495|gb|AAR15893.1|/2e-36/chitinase [Oryza sativa]
Unigene19883_Taxus	4	RawIntensity-ye	1.27	114.42	6.49337	3.81388e-05	0.000147633	-	-	-	gi|226497874|ref|NP_001151520.1|/2e-06/3-beta hydroxysteroid dehydrogenase/isomerase [Zea mays] >gi|195647386|gb|ACG43161.1| 3-beta hydroxysteroid dehydrogenase/isomerase [Zea mays]
Unigene34221_Taxus	2	RawIntensity-ye	0.63	56.49	6.4865	0.000105735	0.00037501	-	-	-	gi|88011082|gb|ABD38900.1|/4e-21/At5g20935 [Arabidopsis thaliana]
Unigene2790_Taxus	2	RawIntensity-ye	0.63	56.49	6.4865	0.000105735	0.000374714	-	-	-	gi|226493275|ref|NP_001151013.1|/3e-06/metal ion binding protein [Zea mays] >gi|195643644|gb|ACG41290.1| metal ion binding protein [Zea mays]
Unigene33721_Taxus	35	RawIntensity-ye	11.1	985.2	6.47179	1.45217e-13	1.6436e-12	-	-	-	gi|116783648|gb|ABK23037.1|/8e-07/unknown [Picea sitchensis] >gi|148907655|gb|ABR16956.1| unknown [Picea sitchensis]
Unigene1499_Taxus	2	RawIntensity-ye	0.63	55.91	6.47161	0.000105735	0.000374862	-	-	-	gi|215415833|dbj|BAG85147.1|/7e-31/Nod factor receptor protein [Glycine soja]
Unigene23290_Taxus	4	RawIntensity-ye	1.27	107.47	6.40296	3.81388e-05	0.000146969	-	-	-	-
Unigene21800_Taxus	16	RawIntensity-ye	5.07	409.61	6.33612	1.92114e-08	1.21394e-07	-	-	-	-
Unigene13595_Taxus	17	RawIntensity-ye	5.39	424.38	6.29893	9.77594e-09	6.39738e-08	-	-	-	gi|239056183|emb|CAQ58618.1|/5e-11/calcium binding [Vitis vinifera]
Unigene26690_Taxus	4	RawIntensity-ye	1.27	99.07	6.28555	3.81388e-05	0.000147538	-	-	-	-
Unigene26500_Taxus	2	RawIntensity-ye	0.63	48.38	6.26292	0.000105735	0.000375084	-	-	-	-
Unigene29373_Taxus	2	RawIntensity-ye	0.63	45.19	6.16451	0.000105735	0.000376122	-	-	-	gi|164657065|ref|XP_001729659.1|/8e-06/hypothetical protein MGL_3203 [Malassezia globosa CBS 7966] >gi|159103552|gb|EDP42445.1| hypothetical protein MGL_3203 [Malassezia globosa CBS 7966]
Unigene17924_Taxus	2	RawIntensity-ye	0.63	43.74	6.11746	0.000105735	0.000376643	-	-	-	gi|115489236|ref|NP_001067105.1|/2e-13/Os12g0575000 [Oryza sativa (japonica cultivar-group)] >gi|77556201|gb|ABA98997.1| expressed protein [Oryza sativa (japonica cultivar-group)] >gi|113649612|dbj|BAF30124.1| Os12g0575000 [Oryza sativa Japonica Group]
Unigene21887_Taxus	3	RawIntensity-ye	0.95	61.99	6.02796	6.40072e-05	0.00023604	-	-	-	-
Unigene17147_Taxus	7	RawIntensity-ye	2.22	141.94	5.99858	6.70866e-06	2.97509e-05	-	-	-	gi|116784684|gb|ABK23437.1|/6e-06/unknown [Picea sitchensis]
Unigene15622_Taxus	528	RawIntensity-ye	167.43	10630.1	5.98846	0	0	-	-	-	gi|1705810|sp|P52406.1|CHI4_SOLTU/2e-06/RecName: Full=Endochitinase 4; Flags: Precursor >gi|467826|gb|AAA17410.1| chitinase; poly[1, 4-beta-(2-acetamido-2-deoxy-D- glucoside)]glucanohydrolase [Solanum tuberosum]
Unigene3850_Taxus	5	RawIntensity-ye	1.59	100.52	5.98231	2.191e-05	8.87846e-05	-	-	-	gi|115467452|ref|NP_001057325.1|/3e-20/Os06g0260000 [Oryza sativa (japonica cultivar-group)]
Unigene23772_Taxus	5	RawIntensity-ye	1.59	98.49	5.95288	2.191e-05	8.86648e-05	-	-	-	-
Unigene829_Taxus	6	RawIntensity-ye	1.9	115.58	5.92675	1.22476e-05	5.19583e-05	-	-	-	-
Unigene5248_Taxus	3	RawIntensity-ye	0.95	57.07	5.90866	6.40072e-05	0.000235557	-	-	-	gi|162319704|gb|ABX84378.1|/1e-10/amylase inhibitor-like protein [Triticum aestivum]
Unigene13109_Taxus	2	RawIntensity-ye	0.63	37.08	5.87915	0.000105735	0.000375825	-	-	-	gi|195629768|gb|ACG36525.1|/1e-107/fatty acid elongase [Zea mays]
Unigene31345_Taxus	31	RawIntensity-ye	9.83	547.21	5.79876	8.99946e-13	9.04267e-12	-	-	-	gi|9843639|emb|CAC03598.1|/4e-22/Rieske FeS protein [Arabidopsis thaliana]
Unigene35751_Taxus	2	RawIntensity-ye	0.63	35.05	5.79792	0.000105735	0.000376494	-	-	-	gi|8778217|gb|AAF79226.1|AC006917_11/9e-29/F10B6.30 [Arabidopsis thaliana]
Unigene34810_Taxus	7	RawIntensity-ye	2.22	120.8	5.76592	6.70866e-06	2.97655e-05	-	-	-	gi|255673227|dbj|BAH91068.1|/6e-06/Os01g0363550 [Oryza sativa Japonica Group]
Unigene18762_Taxus	3	RawIntensity-ye	0.95	51.56	5.76218	6.40072e-05	0.000235991	-	-	-	gi|115469776|ref|NP_001058487.1|/3e-14/Os06g0701900 [Oryza sativa (japonica cultivar-group)]
Unigene32707_Taxus	4	RawIntensity-ye	1.27	68.08	5.74433	3.81388e-05	0.000147221	-	-	-	-
Unigene27319_Taxus	365	RawIntensity-ye	115.74	5988.28	5.69318	6.20392e-13	6.38706e-12	-	-	-	gi|26418686|gb|AAN78125.1|/5e-06/dehydrin [Citrus x paradisi]
Unigene33087_Taxus	2	RawIntensity-ye	0.63	32.44	5.68628	0.000105735	0.000375676	-	-	-	-
Unigene36187_Taxus	13	RawIntensity-ye	4.12	211.18	5.67969	1.42898e-07	8.01367e-07	-	-	-	gi|15220005|ref|NP_178105.1|/2e-30/oxidoreductase family protein [Arabidopsis thaliana] >gi|17978983|gb|AAL47452.1| At1g79870/F19K16_17 [Arabidopsis thaliana] >gi|21360429|gb|AAM47330.1| At1g79870/F19K16_17 [Arabidopsis thaliana]
Unigene1600_Taxus	4	RawIntensity-ye	1.27	64.31	5.66214	3.81388e-05	0.00014757	-	-	-	gi|2346970|dbj|BAA21919.1|/2e-15/ZPT2-10 [Petunia x hybrida] >gi|7959291|dbj|BAA96070.1| C2H2 zinc-finger protein ZPT2-10 [Petunia x hybrida]
Unigene3765_Taxus	5	RawIntensity-ye	1.59	78.5	5.62559	2.191e-05	8.88847e-05	-	-	-	-
Unigene28832_Taxus	2	RawIntensity-ye	0.63	29.84	5.56575	0.000105735	0.000375528	-	-	-	-
Unigene20783_Taxus	2	RawIntensity-ye	0.63	29.26	5.53743	0.000105735	0.000376047	-	-	-	gi|15220595|ref|NP_172055.1|/6e-27/ankyrin repeat family protein [Arabidopsis thaliana] >gi|4836914|gb|AAD30616.1|AC007153_8 Hypothetical protein [Arabidopsis thaliana]
Unigene5817_Taxus	9	RawIntensity-ye	2.85	129.78	5.50896	1.92748e-06	9.28698e-06	-	-	-	gi|45199123|ref|NP_986152.1|/3e-11/AFR605Cp [Ashbya gossypii ATCC 10895] >gi|44985263|gb|AAS53976.1| AFR605Cp [Ashbya gossypii ATCC 10895]
Unigene4851_Taxus	2	RawIntensity-ye	0.63	28.68	5.50855	0.000105735	0.000376568	-	-	-	gi|224090683|ref|XP_002309057.1|/8e-96/cytochrome P450 [Populus trichocarpa] >gi|222855033|gb|EEE92580.1| cytochrome P450 [Populus trichocarpa]
Unigene17793_Taxus	3	RawIntensity-ye	0.95	39.69	5.3847	6.40072e-05	0.000235364	-	-	-	gi|115468008|ref|NP_001057603.1|/7e-07/Os06g0360300 [Oryza sativa (japonica cultivar-group)] >gi|113595643|dbj|BAF19517.1| Os06g0360300 [Oryza sativa Japonica Group]
Unigene33566_Taxus	8	RawIntensity-ye	2.54	100.23	5.30234	3.61802e-06	1.67335e-05	-	-	-	gi|2570515|gb|AAB82143.1|/1e-58/glycolate oxidase [Oryza sativa Indica Group]
Unigene19226_Taxus	2	RawIntensity-ye	0.63	24.62	5.28834	0.000105735	0.000375232	-	-	-	gi|20799725|gb|AAM28625.1|AF503767_1/1e-107/adenosine monophosphate binding protein 8 AMPBP8 [Arabidopsis thaliana]
Unigene25324_Taxus	92	RawIntensity-ye	29.17	1136.42	5.28387	5.9952e-15	8.22957e-14	-	-	-	-
Unigene20822_Taxus	273	RawIntensity-ye	86.57	3313.95	5.25854	1.16795e-13	1.35691e-12	-	-	-	gi|168812248|gb|ACA30299.1|/1e-12/putative low-temperature-induced protein [Cupressus sempervirens]
Unigene7359_Taxus	2	RawIntensity-ye	0.63	23.46	5.21871	0.000105735	0.000374936	-	-	-	gi|255578609|ref|XP_002530166.1|/3e-09/conserved hypothetical protein [Ricinus communis] >gi|223530327|gb|EEF32221.1| conserved hypothetical protein [Ricinus communis]
Unigene34612_Taxus	13	RawIntensity-ye	4.12	152.08	5.20604	1.42898e-07	8.02868e-07	-	-	-	gi|255676080|dbj|BAH92972.1|/9e-18/Os05g0179900 [Oryza sativa Japonica Group]
Unigene34901_Taxus	10	RawIntensity-ye	3.17	114.42	5.17371	1.01677e-06	5.07847e-06	-	-	-	gi|18415378|ref|NP_568178.1|/7e-46/proline-rich family protein [Arabidopsis thaliana]
Unigene32199_Taxus	5	RawIntensity-ye	1.59	57.36	5.17295	2.191e-05	8.88046e-05	-	-	-	gi|115465982|ref|NP_001056590.1|/4e-32/Os06g0112000 [Oryza sativa (japonica cultivar-group)] >gi|7363286|dbj|BAA93030.1| pentatricopeptide (PPR) repeat-containing protein-like [Oryza sativa Japonica Group] >gi|113594630|dbj|BAF18504.1| Os06g0112000 [Oryza sativa Japonica Group]
Unigene6800_Taxus	2	RawIntensity-ye	0.63	22.6	5.16483	0.000105735	0.00037538	-	-	-	-
Unigene27048_Taxus	7	RawIntensity-ye	2.22	79.37	5.15996	6.70866e-06	2.9707e-05	-	-	-	-
Unigene8697_Taxus	4	RawIntensity-ye	1.27	44.61	5.13447	3.81388e-05	0.000147001	-	-	-	-
Unigene24916_Taxus	7	RawIntensity-ye	2.22	74.74	5.07325	6.70866e-06	2.9685e-05	-	-	-	-
Unigene33200_Taxus	3	RawIntensity-ye	0.95	31.58	5.05494	6.40072e-05	0.000235895	-	-	-	gi|255676594|dbj|BAF18300.2|/1e-23/Os05g0574000 [Oryza sativa Japonica Group]
Unigene25519_Taxus	92	RawIntensity-ye	29.17	969.56	5.05477	5.9952e-15	8.17965e-14	-	-	-	gi|131384|sp|P14226.1|PSBO_PEA/6e-33/RecName: Full=Oxygen-evolving enhancer protein 1, chloroplastic; Short=OEE1; AltName: Full=33 kDa subunit of oxygen evolving system of photosystem II; AltName: Full=OEC 33 kDa subunit; AltName: Full=33 kDa thylakoid membrane protein; Flags: Precursor >gi|344004|dbj|BAA02554.1| precursor for 33-kDa protein of photosystem II [Pisum sativum] >gi|226937|prf||16114…
Unigene10829_Taxus	12	RawIntensity-ye	3.81	124.85	5.03426	2.76512e-07	1.49253e-06	-	-	-	-
Unigene29518_Taxus	15	RawIntensity-ye	4.76	154.98	5.02498	3.76412e-08	2.29469e-07	-	-	-	-
Unigene289_Taxus	3	RawIntensity-ye	0.95	30.13	4.98713	6.40072e-05	0.000235702	-	-	-	-
Unigene33378_Taxus	21	RawIntensity-ye	6.66	207.41	4.96082	6.42232e-10	4.79569e-09	-	-	-	gi|148906885|gb|ABR16588.1|/1e-13/unknown [Picea sitchensis]
Unigene27684_Taxus	13	RawIntensity-ye	4.12	126.3	4.93807	1.42898e-07	8.00618e-07	-	-	-	gi|3334199|sp|O49852.1|GCSP_FLATR/5e-11/RecName: Full=Glycine dehydrogenase [decarboxylating], mitochondrial; AltName: Full=Glycine decarboxylase; AltName: Full=Glycine cleavage system P protein; Flags: Precursor >gi|2894360|emb|CAB16916.1| P-Protein precursor [Flaveria trinervia]
Unigene23148_Taxus	21	RawIntensity-ye	6.66	200.46	4.91165	6.42232e-10	4.78973e-09	-	-	-	-
Unigene14714_Taxus	2	RawIntensity-ye	0.63	18.83	4.90154	0.000105735	0.000375602	-	-	-	gi|224087694|ref|XP_002308208.1|/1e-155/laccase 1c [Populus trichocarpa] >gi|222854184|gb|EEE91731.1| laccase 1c [Populus trichocarpa]
Unigene32933_Taxus	36	RawIntensity-ye	11.42	339.8	4.89505	1.10134e-13	1.28867e-12	-	-	-	gi|115458046|ref|NP_001052623.1|/2e-15/Os04g0386700 [Oryza sativa (japonica cultivar-group)] >gi|38347228|emb|CAE05023.2| OSJNBa0044M19.10 [Oryza sativa (japonica cultivar-group)]
Unigene2060_Taxus	2	RawIntensity-ye	0.63	18.54	4.87915	0.000105735	0.000375306	-	GO:0009055//electron carrier activity;GO:0020037//heme binding;GO:0050597	GO:0042617;GO:0055114//oxidation reduction	gi|224142651|ref|XP_002324668.1|/2e-16/cytochrome P450 [Populus trichocarpa] >gi|222866102|gb|EEF03233.1| cytochrome P450 [Populus trichocarpa]
Unigene11084_Taxus	2	RawIntensity-ye	0.63	18.54	4.87915	0.000105735	0.000375158	-	-	-	gi|108740354|gb|ABG01533.1|/1e-35/disease resistance protein [Arabidopsis thaliana] >gi|108740356|gb|ABG01534.1| disease resistance protein [Arabidopsis thaliana] >gi|108740378|gb|ABG01545.1| disease resistance protein [Arabidopsis thaliana] >gi|108740380|gb|ABG01546.1| disease resistance protein [Arabidopsis thaliana]
Unigene105_Taxus	139	RawIntensity-ye	44.08	1286.47	4.86715	1.49436e-13	1.68499e-12	-	-	-	gi|127384|sp|P20830.1|MT1_PEA/2e-06/RecName: Full=Metallothionein-like protein 1; Short=MT-1 >gi|312505|emb|CAA80645.1| metallothionein-like protein [Pisum sativum]
Unigene30420_Taxus	56	RawIntensity-ye	17.76	513.6	4.85394	0	0	-	-	-	gi|115443897|ref|NP_001045728.1|/6e-06/Os02g0122600 [Oryza sativa (japonica cultivar-group)] >gi|113535259|dbj|BAF07642.1| Os02g0122600 [Oryza sativa Japonica Group]
Unigene26178_Taxus	2	RawIntensity-ye	0.63	17.96	4.83329	0.000105735	0.000376419	-	-	-	-
Unigene17348_Taxus	15	RawIntensity-ye	4.76	134.41	4.81954	3.76412e-08	2.29313e-07	-	-	-	gi|18416145|ref|NP_567681.1|/8e-56/short-chain dehydrogenase/reductase (SDR) family protein [Arabidopsis thaliana]
Unigene17174_Taxus	5	RawIntensity-ye	1.59	44.61	4.81027	2.191e-05	8.85056e-05	-	-	-	gi|108862482|gb|ABA97463.2|/3e-12/expressed protein [Oryza sativa (japonica cultivar-group)]
Unigene21571_Taxus	4	RawIntensity-ye	1.27	35.34	4.7984	3.81388e-05	0.000147127	-	-	-	-
Unigene8837_Taxus	2	RawIntensity-ye	0.63	17.38	4.78593	0.000105735	0.000376345	-	-	-	-
Unigene36087_Taxus	6	RawIntensity-ye	1.9	52.14	4.77832	1.22476e-05	5.18605e-05	-	-	-	gi|32400790|gb|AAP80627.1|AF475105_1/9e-38/apomixis-associated protein [Triticum aestivum]
Unigene20922_Taxus	4	RawIntensity-ye	1.27	34.76	4.77453	3.81388e-05	0.000147697	-	-	-	gi|32487575|emb|CAE04461.1|/1e-44/OSJNBa0029L02.2 [Oryza sativa (japonica cultivar-group)]
Unigene1041_Taxus	6	RawIntensity-ye	1.9	51.85	4.77027	1.22476e-05	5.18849e-05	-	-	-	gi|255669962|dbj|BAH95476.1|/2e-31/Os12g0105375 [Oryza sativa Japonica Group]
Unigene27829_Taxus	4	RawIntensity-ye	1.27	34.18	4.75025	3.81388e-05	0.000147411	-	-	-	gi|2739046|gb|AAB94599.1|/8e-06/polyphosphoinositide binding protein Ssh2p [Glycine max]
Unigene33004_Taxus	21	RawIntensity-ye	6.66	178.73	4.74612	6.42232e-10	4.78576e-09	-	-	-	-
Unigene35502_Taxus	15	RawIntensity-ye	4.76	127.46	4.74294	3.76412e-08	2.29391e-07	-	-	-	gi|116000819|emb|CAL50499.1|/2e-12/thylakoid lumen protein, chloroplast prec (ISS) [Ostreococcus tauri]
Unigene2562_Taxus	7	RawIntensity-ye	2.22	58.81	4.72743	6.70866e-06	2.96923e-05	-	GO:0016747//transferase activity, transferring acyl groups other than amino-acyl groups	GO:0008152//metabolic process	gi|15239981|ref|NP_199189.1|/4e-79/KCS20 (3-KETOACYL-COA SYNTHASE 20); fatty acid elongase [Arabidopsis thaliana] >gi|75262422|sp|Q9FG87.1|KCS19_ARATH RecName: Full=3-ketoacyl-CoA synthase 19; Short=KCS-19; AltName: Full=Very long-chain fatty acid condensing enzyme 19; Short=VLCFA condensing enzyme 19 >gi|15983491|gb|AAL11613.1|AF424620_1 AT5g43760/MQD19_11 [Arabidopsis thaliana] >gi|10177945|dbj…
Unigene6741_Taxus	13	RawIntensity-ye	4.12	108.92	4.72448	1.42898e-07	8.02617e-07	-	-	-	-
Unigene12512_Taxus	3	RawIntensity-ye	0.95	24.91	4.71265	6.40072e-05	0.000235846	-	-	-	gi|105829624|gb|ABF74699.1|/3e-14/At3g45050 [Arabidopsis thaliana]
Unigene3033_Taxus	5	RawIntensity-ye	1.59	41.42	4.70323	2.191e-05	8.86249e-05	-	-	-	gi|238842518|gb|EEQ32180.1|/1e-35/ATPase [Microsporum canis CBS 113480]
Unigene15214_Taxus	39	RawIntensity-ye	12.37	315.75	4.67387	9.39248e-14	1.11569e-12	-	-	-	gi|108709557|gb|ABF97352.1|/2e-57/expressed protein [Oryza sativa (japonica cultivar-group)]
Unigene29179_Taxus	2	RawIntensity-ye	0.63	15.93	4.66025	0.000105735	0.00037627	-	-	-	gi|115455321|ref|NP_001051261.1|/4e-22/Os03g0747700 [Oryza sativa (japonica cultivar-group)] >gi|108711066|gb|ABF98861.1| expressed protein [Oryza sativa (japonica cultivar-group)] >gi|113549732|dbj|BAF13175.1| Os03g0747700 [Oryza sativa Japonica Group]
Unigene35232_Taxus	69	RawIntensity-ye	21.88	552.13	4.65732	0	0	-	-	-	gi|124110780|gb|ABM91752.1|/1e-82/acidic thaumatin-like protein 5 precursor [Taxus x media]
Unigene32680_Taxus	29	RawIntensity-ye	9.2	231.46	4.65299	2.99094e-12	2.83887e-11	-	-	-	-
Unigene377_Taxus	12	RawIntensity-ye	3.81	95.31	4.64476	2.76512e-07	1.49075e-06	-	-	-	-
Unigene24147_Taxus	3	RawIntensity-ye	0.95	23.75	4.64386	6.40072e-05	0.000235653	-	-	-	-
Unigene31415_Taxus	2	RawIntensity-ye	0.63	15.64	4.63374	0.000105735	0.000374788	-	-	-	gi|2244825|emb|CAB10248.1|/4e-17/light induced protein like [Arabidopsis thaliana] >gi|7268175|emb|CAB78511.1| light induced protein like [Arabidopsis thaliana]
Unigene33539_Taxus	3	RawIntensity-ye	0.95	23.46	4.62613	6.40072e-05	0.00023575	-	-	-	-
Unigene15580_Taxus	5	RawIntensity-ye	1.59	39.11	4.62044	2.191e-05	8.87247e-05	-	-	-	gi|5902368|gb|AAD55470.1|AC009322_10/2e-06/Unknown protein [Arabidopsis thaliana]
Unigene34817_Taxus	10	RawIntensity-ye	3.17	76.48	4.59253	1.01677e-06	5.0827e-06	-	-	-	gi|115456065|ref|NP_001051633.1|/8e-17/Os03g0805900 [Oryza sativa (japonica cultivar-group)] >gi|108711643|gb|ABF99438.1| Rieske domain containing protein, expressed [Oryza sativa (japonica cultivar-group)] >gi|113550104|dbj|BAF13547.1| Os03g0805900 [Oryza sativa Japonica Group]
Unigene24406_Taxus	3	RawIntensity-ye	0.95	22.88	4.59002	6.40072e-05	0.000235605	-	-	-	-
Unigene9926_Taxus	7	RawIntensity-ye	2.22	53.3	4.5855	6.70866e-06	2.97362e-05	-	-	-	-
Unigene14957_Taxus	2	RawIntensity-ye	0.63	14.77	4.55117	0.000105735	0.000375973	-	-	-	gi|168054173|ref|XP_001779507.1|/2e-31/single bromodomain-containing protein [Physcomitrella patens subsp. patens] >gi|162669089|gb|EDQ55683.1| single bromodomain-containing protein [Physcomitrella patens subsp. patens]
Unigene30324_Taxus	39	RawIntensity-ye	12.37	289.1	4.54665	9.39248e-14	1.11864e-12	-	-	-	gi|168001771|ref|XP_001753588.1|/3e-31/predicted protein [Physcomitrella patens subsp. patens] >gi|162695467|gb|EDQ81811.1| predicted protein [Physcomitrella patens subsp. patens]
Unigene12175_Taxus	3	RawIntensity-ye	0.95	21.73	4.51562	6.40072e-05	0.000236088	-	-	-	-
Unigene17218_Taxus	4	RawIntensity-ye	1.27	28.97	4.51166	3.81388e-05	0.000147379	-	-	-	gi|255679666|dbj|BAH95015.1|/1e-05/Os10g0575401 [Oryza sativa Japonica Group]
Unigene21500_Taxus	5	RawIntensity-ye	1.59	35.63	4.48599	2.191e-05	8.88446e-05	-	-	-	gi|6635838|gb|AAF20002.1|AF213936_1/1e-139/amino acid/peptide transporter [Prunus dulcis]
Unigene26852_Taxus	9	RawIntensity-ye	2.85	63.73	4.48294	1.92748e-06	9.24736e-06	-	-	-	-
Unigene31967_Taxus	9	RawIntensity-ye	2.85	63.44	4.47636	1.92748e-06	9.27208e-06	-	-	-	gi|148907760|gb|ABR17006.1|/2e-15/unknown [Picea sitchensis]
Unigene34487_Taxus	4	RawIntensity-ye	1.27	28.1	4.46767	3.81388e-05	0.000147443	-	-	-	gi|168062613|ref|XP_001783273.1|/6e-19/predicted protein [Physcomitrella patens subsp. patens] >gi|162665191|gb|EDQ51883.1| predicted protein [Physcomitrella patens subsp. patens]
Unigene11429_Taxus	4	RawIntensity-ye	1.27	28.1	4.46767	3.81388e-05	0.000146938	-	-	-	gi|226491834|ref|NP_001147590.1|/1e-06/chloroplast oxygen-evolving complex/thylakoid lumenal 25.6kDa protein [Zea mays] >gi|195612378|gb|ACG28019.1| chloroplast oxygen-evolving complex/thylakoid lumenal 25.6kDa protein [Zea mays]
Unigene30821_Taxus	14	RawIntensity-ye	4.44	97.91	4.46282	7.34918e-08	4.3052e-07	-	-	-	-
Unigene10101_Taxus	5	RawIntensity-ye	1.59	35.05	4.46232	2.191e-05	8.86847e-05	-	-	-	-
Unigene18303_Taxus	13	RawIntensity-ye	4.12	89.51	4.44133	1.42898e-07	8.04123e-07	-	-	-	gi|24266823|gb|AAN52360.1|/1e-109/5-alpha-taxadienol-10-beta-hydroxylase [Taxus wallichiana var. chinensis] >gi|42541090|gb|AAS19442.1| 5-alpha-taxadienol-10-beta-hydroxylase [Taxus wallichiana var. chinensis]
Unigene20334_Taxus	2	RawIntensity-ye	0.63	13.62	4.43423	0.000105735	0.00037575	-	-	-	-
Unigene2854_Taxus	2	RawIntensity-ye	0.63	13.62	4.43423	0.000105735	0.000375454	-	-	-	-
Unigene20310_Taxus	9	RawIntensity-ye	2.85	61.41	4.42944	1.92748e-06	9.28449e-06	GO:0009535//chloroplast thylakoid membrane	-	-	gi|255070859|ref|XP_002507511.1|/7e-06/nadh-nitrite reductase [Micromonas sp. RCC299] >gi|226522786|gb|ACO68769.1| nadh-nitrite reductase [Micromonas sp. RCC299]
Unigene16706_Taxus	10	RawIntensity-ye	3.17	67.5	4.41233	1.01677e-06	5.07988e-06	-	-	-	-
Unigene35870_Taxus	21	RawIntensity-ye	6.66	140.5	4.3989	6.42232e-10	4.80366e-09	-	-	-	gi|30693911|ref|NP_850698.1|/2e-12/rhomboid family protein [Arabidopsis thaliana]
Unigene17128_Taxus	16	RawIntensity-ye	5.07	106.6	4.39408	1.92114e-08	1.21308e-07	-	-	-	gi|238033777|emb|CAY71799.1|/6e-07/Hypothetical protein [Pichia pastoris GS115]
Unigene23244_Taxus	14	RawIntensity-ye	4.44	92.7	4.38394	7.34918e-08	4.3024e-07	-	-	-	-
Unigene12350_Taxus	6	RawIntensity-ye	1.9	39.4	4.37412	1.22476e-05	5.17631e-05	-	-	-	gi|25082946|gb|AAN72020.1|/4e-06/Unknown protein [Arabidopsis thaliana] >gi|31711852|gb|AAP68282.1| At1g73060 [Arabidopsis thaliana]
Unigene28725_Taxus	5	RawIntensity-ye	1.59	32.73	4.36351	2.191e-05	8.8605e-05	-	-	-	-
Unigene23192_Taxus	4	RawIntensity-ye	1.27	26.07	4.35949	3.81388e-05	0.000147506	-	-	-	-
Unigene27157_Taxus	88	RawIntensity-ye	27.91	572.12	4.35746	1.59872e-14	2.11704e-13	-	-	-	-
Unigene59_Taxus	98	RawIntensity-ye	31.08	632.37	4.34671	1.11022e-15	1.60866e-14	-	-	-	gi|15229066|ref|NP_188379.1|/2e-15/late embryogenesis abundant domain-containing protein / LEA domain-containing protein [Arabidopsis thaliana]
Unigene7111_Taxus	2	RawIntensity-ye	0.63	12.75	4.339	0.000105735	0.000374494	-	-	-	gi|156972213|gb|ABU98940.1|/7e-32/early light-induced protein 3 [Rhododendron catawbiense]
Unigene34422_Taxus	31	RawIntensity-ye	9.83	197.27	4.32684	8.99946e-13	9.05278e-12	-	-	-	gi|1175703|sp|P46314.1|YCF23_ANTSP/4e-09/RecName: Full=Uncharacterized protein ycf23
Unigene4723_Taxus	7	RawIntensity-ye	2.22	44.32	4.31933	6.70866e-06	2.97143e-05	-	-	-	gi|15233744|ref|NP_194152.1|/4e-06/SLY1 (SLEEPY1) [Arabidopsis thaliana] >gi|75266339|sp|Q9STX3.1|GID2_ARATH RecName: Full=F-box protein GID2; AltName: Full=Protein SLEEPY 1
Unigene15788_Taxus	4	RawIntensity-ye	1.27	25.2	4.31052	3.81388e-05	0.000147474	-	-	-	-
Unigene17547_Taxus	2	RawIntensity-ye	0.63	12.46	4.30581	0.000105735	0.000374568	-	-	-	gi|115436404|ref|NP_001042960.1|/2e-07/Os01g0343500 [Oryza sativa (japonica cultivar-group)] >gi|113532491|dbj|BAF04874.1| Os01g0343500 [Oryza sativa Japonica Group]
Unigene33716_Taxus	21	RawIntensity-ye	6.66	130.94	4.29724	6.42232e-10	4.80166e-09	-	-	-	gi|239616064|gb|ACR83706.1|/2e-12/MYB transcription factor R2R3-like protein [Populus tremuloides]
Unigene32305_Taxus	10	RawIntensity-ye	3.17	61.99	4.28948	1.01677e-06	5.09119e-06	-	-	-	gi|222424621|dbj|BAH20265.1|/2e-11/AT1G28100 [Arabidopsis thaliana]
Unigene23367_Taxus	2	RawIntensity-ye	0.63	12.17	4.27183	0.000105735	0.000374421	-	-	-	-
Unigene3225_Taxus	5	RawIntensity-ye	1.59	30.71	4.27161	2.191e-05	8.84857e-05	-	-	-	gi|115439143|ref|NP_001043851.1|/1e-32/Os01g0677000 [Oryza sativa (japonica cultivar-group)] >gi|20161084|dbj|BAB90014.1| glyoxal oxidase precursor-like [Oryza sativa Japonica Group] >gi|113533382|dbj|BAF05765.1| Os01g0677000 [Oryza sativa Japonica Group]
Unigene15618_Taxus	16	RawIntensity-ye	5.07	97.33	4.26283	1.92114e-08	1.21479e-07	-	-	-	gi|162462506|ref|NP_001105125.1|/0.0/outer cell layer3 [Zea mays] >gi|8920423|emb|CAB96423.1| OCL3 protein [Zea mays]
Unigene1441_Taxus	5	RawIntensity-ye	1.59	30.42	4.25792	2.191e-05	8.85851e-05	-	-	-	gi|124359951|gb|ABN07967.1|/2e-13/4Fe-4S ferredoxin, iron-sulfur binding [Medicago truncatula]
Unigene12011_Taxus	7	RawIntensity-ye	2.22	42.29	4.25168	6.70866e-06	2.98023e-05	-	-	-	-
Unigene15950_Taxus	7	RawIntensity-ye	2.22	42.29	4.25168	6.70866e-06	2.97876e-05	-	-	-	gi|224001308|ref|XP_002290326.1|/2e-91/gamma-glutamyltransferase [Thalassiosira pseudonana CCMP1335] >gi|220973748|gb|EED92078.1| gamma-glutamyltransferase [Thalassiosira pseudonana CCMP1335]
Unigene35987_Taxus	4	RawIntensity-ye	1.27	24.04	4.24254	3.81388e-05	0.000147348	-	-	-	gi|159469530|ref|XP_001692916.1|/2e-25/flavodoxin-like protein [Chlamydomonas reinhardtii] >gi|158277718|gb|EDP03485.1| flavodoxin-like protein [Chlamydomonas reinhardtii]
Unigene34423_Taxus	26	RawIntensity-ye	8.24	154.98	4.23329	2.1358e-11	1.84256e-10	-	-	-	gi|116061765|emb|CAL52483.1|/9e-30/COG0426: Uncharacterized flavoproteins (ISS) [Ostreococcus tauri]
Unigene28966_Taxus	17	RawIntensity-ye	5.39	100.52	4.22105	9.77594e-09	6.39505e-08	-	-	-	-
Unigene35955_Taxus	19	RawIntensity-ye	6.03	110.95	4.20161	2.51356e-09	1.75122e-08	-	-	-	gi|116058263|emb|CAL53452.1|/2e-38/ribulose-phosphate 3-epimerase (IC) [Ostreococcus tauri]
Unigene12839_Taxus	4	RawIntensity-ye	1.27	23.17	4.18936	3.81388e-05	0.000147665	-	-	-	gi|115489108|ref|NP_001067041.1|/1e-09/Os12g0564400 [Oryza sativa (japonica cultivar-group)] >gi|113649548|dbj|BAF30060.1| Os12g0564400 [Oryza sativa Japonica Group]
Unigene2817_Taxus	4	RawIntensity-ye	1.27	23.17	4.18936	3.81388e-05	0.000147316	-	-	-	gi|255677875|dbj|BAH93980.1|/2e-13/Os07g0553633 [Oryza sativa Japonica Group]
Unigene36072_Taxus	17	RawIntensity-ye	5.39	97.91	4.1831	9.77594e-09	6.39273e-08	-	-	-	gi|58265174|ref|XP_569743.1|/5e-33/Quinone oxidoreductase [Cryptococcus neoformans var. neoformans JEC21]
Unigene31884_Taxus	10	RawIntensity-ye	3.17	57.36	4.17749	1.01677e-06	5.07706e-06	-	-	-	-
Unigene36388_Taxus	3	RawIntensity-ye	0.95	16.8	4.14439	6.40072e-05	0.000236136	GO:0009536//plastid	GO:0005488//binding;GO:0016787//hydrolase activity	-	gi|255940726|ref|XP_002561132.1|/6e-06/Pc16g08100 [Penicillium chrysogenum Wisconsin 54-1255] >gi|211585755|emb|CAP93480.1| Pc16g08100 [Penicillium chrysogenum Wisconsin 54-1255]
Unigene2137_Taxus	6	RawIntensity-ye	1.9	33.6	4.14439	1.22476e-05	5.17996e-05	-	-	-	gi|255674937|dbj|BAF13336.2|/8e-12/Os03g0774400 [Oryza sativa Japonica Group]
Unigene14865_Taxus	16	RawIntensity-ye	5.07	87.19	4.10411	1.92114e-08	1.21436e-07	-	-	-	-
Unigene5092_Taxus	4	RawIntensity-ye	1.27	21.73	4.09679	3.81388e-05	0.000147032	GO:0016023//cytoplasmic membrane-bounded vesicle	-	-	gi|208081617|gb|ACD65509.2|/1e-142/beta-glucosidase D4 [Lotus japonicus]
Unigene36016_Taxus	10	RawIntensity-ye	3.17	54.17	4.09494	1.01677e-06	5.08977e-06	-	-	-	gi|79325958|ref|NP_001031763.1|/3e-83/ABC1 family protein [Arabidopsis thaliana]
Unigene3663_Taxus	2	RawIntensity-ye	0.63	10.72	4.08881	0.000105742	0.000374372	-	-	-	-
Unigene19484_Taxus	27	RawIntensity-ye	8.56	145.13	4.08359	1.09166e-11	9.79338e-11	-	-	-	gi|15242870|ref|NP_198334.1|/3e-78/PAP26 (PURPLE ACID PHOSPHATASE 26); acid phosphatase/ protein serine/threonine phosphatase [Arabidopsis thaliana] >gi|75249765|sp|Q949Y3.1|PPA26_ARATH RecName: Full=Bifunctional purple acid phosphatase 26; Includes: RecName: Full=Acid phosphatase; Includes: RecName: Full=Peroxidase; Flags: Precursor
Unigene27738_Taxus	74	RawIntensity-ye	23.47	395.12	4.0734	0	0	-	-	-	-
Unigene30906_Taxus	27	RawIntensity-ye	8.56	143.97	4.07201	1.09166e-11	9.80315e-11	-	-	-	-
Unigene26617_Taxus	22	RawIntensity-ye	6.98	116.45	4.06034	3.24314e-10	2.4825e-09	-	-	-	-
Unigene8058_Taxus	2	RawIntensity-ye	0.63	10.43	4.04924	0.000105748	0.00037432	-	-	-	gi|226531147|ref|NP_001150609.1|/4e-42/anthocyanidin 3-O-glucosyltransferase [Zea mays] >gi|195640540|gb|ACG39738.1| anthocyanidin 3-O-glucosyltransferase [Zea mays]
Unigene15795_Taxus	9	RawIntensity-ye	2.85	46.93	4.04148	1.92748e-06	9.28201e-06	-	-	-	gi|226494115|ref|NP_001148440.1|/4e-51/short-chain dehydrogenase/reductase SDR [Zea mays] >gi|195619288|gb|ACG31474.1| short-chain dehydrogenase/reductase SDR [Zea mays]
Unigene21249_Taxus	10	RawIntensity-ye	3.17	52.14	4.03984	1.01677e-06	5.08835e-06	-	-	-	gi|50551771|ref|XP_503360.1|/8e-08/YALI0E00132p [Yarrowia lipolytica] >gi|49649229|emb|CAG78939.1| YALI0E00132p [Yarrowia lipolytica]
Unigene30938_Taxus	11	RawIntensity-ye	3.49	57.36	4.03875	5.32026e-07	2.76077e-06	-	-	-	gi|159478056|ref|XP_001697120.1|/2e-09/thylakoid lumenal protein [Chlamydomonas reinhardtii] >gi|158274594|gb|EDP00375.1| thylakoid lumenal protein [Chlamydomonas reinhardtii]
Unigene30760_Taxus	14	RawIntensity-ye	4.44	71.84	4.01616	7.34918e-08	4.2996e-07	-	-	-	gi|168026880|ref|XP_001765959.1|/9e-34/trehalose-6-phosphate synthase [Physcomitrella patens subsp. patens] >gi|162682865|gb|EDQ69280.1| trehalose-6-phosphate synthase [Physcomitrella patens subsp. patens]
Unigene32747_Taxus	17	RawIntensity-ye	5.39	87.19	4.01581	9.77594e-09	6.3904e-08	-	-	-	-
Unigene3668_Taxus	9	RawIntensity-ye	2.85	46.06	4.01448	1.92748e-06	9.26218e-06	-	-	-	gi|7804485|dbj|BAA95669.1|/0.0/phototropin [Adiantum capillus-veneris]
Unigene24418_Taxus	3	RawIntensity-ye	0.95	15.35	4.01417	6.40072e-05	0.000235461	-	-	-	-
Unigene17548_Taxus	8	RawIntensity-ye	2.54	40.85	4.00744	3.61802e-06	1.67421e-05	-	-	-	gi|159479580|ref|XP_001697868.1|/8e-18/rubisco large subunit N-methyltransferase [Chlamydomonas reinhardtii] >gi|158273966|gb|EDO99751.1| rubisco large subunit N-methyltransferase [Chlamydomonas reinhardtii]
Unigene7897_Taxus	5	RawIntensity-ye	1.59	25.49	4.00283	2.191e-05	8.86449e-05	-	-	-	gi|148910324|gb|ABR18241.1|/6e-17/unknown [Picea sitchensis]
Unigene26567_Taxus	4	RawIntensity-ye	1.27	20.28	3.99716	3.81388e-05	0.000147158	-	-	-	-
Unigene13926_Taxus	46	RawIntensity-ye	14.59	232.61	3.99486	6.10622e-14	7.59416e-13	GO:0009536//plastid;GO:0016020//membrane	-	-	gi|195636268|gb|ACG37602.1|/4e-13/cold acclimation protein COR413-PM1 [Zea mays]
Unigene22879_Taxus	30	RawIntensity-ye	9.51	151.21	3.99096	1.60294e-12	1.56775e-11	-	-	-	-
Unigene10371_Taxus	11	RawIntensity-ye	3.49	55.04	3.97918	5.32026e-07	2.76156e-06	-	-	-	gi|255586944|ref|XP_002534072.1|/1e-115/ER glycerol-phosphate acyltransferase [Ricinus communis] >gi|223525899|gb|EEF28316.1| ER glycerol-phosphate acyltransferase [Ricinus communis]
Unigene2650_Taxus	4	RawIntensity-ye	1.27	19.99	3.97638	3.81388e-05	0.000147064	-	-	-	gi|3914402|sp|O24163.1|PPOC_TOBAC/1e-41/RecName: Full=Protoporphyrinogen oxidase, chloroplastic; Short=PPO; AltName: Full=Protoporphyrinogen IX oxidase isozyme I; Short=PPO I; Short=PPX I; Flags: Precursor >gi|2370333|emb|CAA73865.1| protoporphyrinogen oxidase [Nicotiana tabacum]
Unigene30374_Taxus	57	RawIntensity-ye	18.08	283.89	3.97287	2.73114e-14	3.5334e-13	-	-	-	gi|119906|sp|P00455.1|FENR_SPIOL/6e-06/RecName: Full=Ferredoxin--NADP reductase, chloroplastic; Short=FNR; Flags: Precursor
Unigene25505_Taxus	2	RawIntensity-ye	0.63	9.85	3.9667	0.000105779	0.000374355	-	-	-	-
Unigene19900_Taxus	6	RawIntensity-ye	1.9	29.55	3.95909	1.22476e-05	5.19216e-05	-	-	-	gi|255670559|dbj|BAH91509.1|/2e-23/Os02g0122500 [Oryza sativa Japonica Group]
Unigene30241_Taxus	3	RawIntensity-ye	0.95	14.77	3.9586	6.40072e-05	0.000235509	-	-	-	gi|224073748|ref|XP_002304154.1|/3e-07/predicted protein [Populus trichocarpa] >gi|222841586|gb|EEE79133.1| predicted protein [Populus trichocarpa]
Unigene10634_Taxus	182	RawIntensity-ye	57.71	887	3.94204	0	0	-	-	-	gi|219562761|gb|ACL27840.1|/2e-18/dehydrin 9 [Pinus contorta]
Unigene21368_Taxus	10	RawIntensity-ye	3.17	48.67	3.94048	1.01677e-06	5.07565e-06	-	-	-	gi|115470333|ref|NP_001058765.1|/2e-52/Os07g0118300 [Oryza sativa (japonica cultivar-group)] >gi|113610301|dbj|BAF20679.1| Os07g0118300 [Oryza sativa Japonica Group]
Unigene2041_Taxus	4	RawIntensity-ye	1.27	19.41	3.9339	3.81388e-05	0.000147285	-	-	-	gi|7573420|emb|CAB87736.1|/5e-07/translation releasing factor RF-1-like protein [Arabidopsis thaliana]
Unigene10046_Taxus	6	RawIntensity-ye	1.9	28.97	3.93049	1.22476e-05	5.19705e-05	-	-	-	-
Unigene8017_Taxus	3	RawIntensity-ye	0.95	14.48	3.92999	6.40072e-05	0.000235413	-	-	-	gi|116058031|emb|CAL54234.1|/6e-07/GDP-mannose 4,6 dehydratase (ISS) [Ostreococcus tauri]
Unigene32852_Taxus	8	RawIntensity-ye	2.54	38.24	3.91218	3.61802e-06	1.67292e-05	-	-	-	-
Unigene31489_Taxus	6	RawIntensity-ye	1.9	28.39	3.90131	1.22476e-05	5.18483e-05	-	-	-	-
Unigene21218_Taxus	3	RawIntensity-ye	0.95	14.19	3.9008	6.40074e-05	0.000235269	-	-	-	gi|115457714|ref|NP_001052457.1|/1e-135/Os04g0320100 [Oryza sativa (japonica cultivar-group)] >gi|113564028|dbj|BAF14371.1| Os04g0320100 [Oryza sativa Japonica Group]
Unigene15889_Taxus	2	RawIntensity-ye	0.63	9.27	3.87915	0.000105879	0.000374637	-	-	-	gi|209954703|dbj|BAG80542.1|/8e-47/glycosyltransferase [Lycium barbarum]
Unigene14706_Taxus	5	RawIntensity-ye	1.59	23.17	3.86516	2.191e-05	8.84659e-05	-	-	-	gi|5302799|emb|CAB46041.1|/1e-52/gibberellin oxidase-like protein [Arabidopsis thaliana] >gi|7268427|emb|CAB78719.1| gibberellin oxidase-like protein [Arabidopsis thaliana]
Unigene23285_Taxus	69	RawIntensity-ye	21.88	318.65	3.86429	0	0	-	-	-	-
Unigene36074_Taxus	8	RawIntensity-ye	2.54	36.5	3.845	3.61802e-06	1.67378e-05	-	-	-	gi|5804780|dbj|BAA83595.1|/6e-10/chloroplast ascorbate peroxidase [Chlamydomonas sp. W80]
Unigene7532_Taxus	20	RawIntensity-ye	6.34	90.96	3.84268	1.27124e-09	9.15456e-09	-	-	-	gi|224075319|ref|XP_002304592.1|/5e-34/AP2/ERF domain-containing transcription factor [Populus trichocarpa] >gi|222842024|gb|EEE79571.1| AP2/ERF domain-containing transcription factor [Populus trichocarpa]
Unigene16181_Taxus	2	RawIntensity-ye	0.63	8.98	3.83329	0.000105996	0.00037483	-	-	-	gi|30682417|ref|NP_850793.1|/2e-06/VQ motif-containing protein [Arabidopsis thaliana] >gi|91806832|gb|ABE66143.1| VQ motif-containing protein [Arabidopsis thaliana] >gi|109946555|gb|ABG48456.1| At5g08480 [Arabidopsis thaliana]
Unigene20080_Taxus	2	RawIntensity-ye	0.63	8.98	3.83329	0.000105996	0.000374757	-	-	-	gi|21655189|gb|AAM28909.1|/5e-06/NBS/LRR [Pinus taeda]
Unigene13023_Taxus	7	RawIntensity-ye	2.22	31.58	3.83038	6.70866e-06	2.96777e-05	-	-	-	gi|224713522|gb|ACN62068.1|/3e-21/PPR-814b [Zea mays]
Unigene36054_Taxus	17	RawIntensity-ye	5.39	75.9	3.81574	9.77594e-09	6.38808e-08	-	-	-	gi|18406507|ref|NP_566015.1|/1e-06/calcium-binding EF hand family protein [Arabidopsis thaliana] >gi|3128177|gb|AAC16081.1| expressed protein [Arabidopsis thaliana]
Unigene14205_Taxus	9	RawIntensity-ye	2.85	39.98	3.81024	1.92748e-06	9.2523e-06	-	-	-	gi|26451337|dbj|BAC42769.1|/1e-10/SRG1 like protein [Arabidopsis thaliana]
Unigene1066_Taxus	4	RawIntensity-ye	1.27	17.67	3.7984	3.81388e-05	0.000147253	-	-	-	-
Unigene17762_Taxus	5	RawIntensity-ye	1.59	22.02	3.79172	2.191e-05	8.85255e-05	-	-	-	gi|159466422|ref|XP_001691408.1|/5e-08/peptidyl-prolyl cis-trans isomerase, cyclophilin-type [Chlamydomonas reinhardtii] >gi|158279380|gb|EDP05141.1| peptidyl-prolyl cis-trans isomerase, cyclophilin-type [Chlamydomonas reinhardtii]
Unigene33668_Taxus	65	RawIntensity-ye	20.61	283.02	3.77949	0	0	-	-	-	gi|224067104|ref|XP_002302357.1|/1e-28/precursor of transferase serine hydroxymethyltransferase 3 [Populus trichocarpa] >gi|222844083|gb|EEE81630.1| precursor of transferase serine hydroxymethyltransferase 3 [Populus trichocarpa]
Unigene7248_Taxus	6	RawIntensity-ye	1.9	26.07	3.77832	1.22476e-05	5.18727e-05	-	-	-	-
Unigene35315_Taxus	141	RawIntensity-ye	44.71	606.88	3.76274	0	0	-	-	-	gi|159478022|ref|XP_001697103.1|/1e-100/membrane AAA-metalloprotease [Chlamydomonas reinhardtii] >gi|158274577|gb|EDP00358.1| membrane AAA-metalloprotease [Chlamydomonas reinhardtii]
Unigene22623_Taxus	5	RawIntensity-ye	1.59	21.44	3.75321	2.191e-05	8.85453e-05	-	-	-	-
Unigene28720_Taxus	25	RawIntensity-ye	7.93	106.89	3.75266	4.1946e-11	3.51752e-10	-	-	-	-
Unigene17303_Taxus	19	RawIntensity-ye	6.03	81.11	3.74965	2.51356e-09	1.75054e-08	-	-	-	gi|115474549|ref|NP_001060871.1|/3e-26/Os08g0119300 [Oryza sativa (japonica cultivar-group)] >gi|113622840|dbj|BAF22785.1| Os08g0119300 [Oryza sativa Japonica Group]
Unigene10098_Taxus	11	RawIntensity-ye	3.49	46.93	3.74921	5.32026e-07	2.75918e-06	-	-	-	-
Unigene26383_Taxus	7	RawIntensity-ye	2.22	29.84	3.74862	6.70866e-06	2.97216e-05	GO:0009535//chloroplast thylakoid membrane	-	-	gi|3090403|emb|CAA06667.1|/1e-07/cytochrome b6f complex subunit [Arabidopsis thaliana]
Unigene17605_Taxus	14	RawIntensity-ye	4.44	59.67	3.74837	7.34918e-08	4.31222e-07	-	-	-	gi|115480489|ref|NP_001063838.1|/9e-06/Os09g0546000 [Oryza sativa (japonica cultivar-group)] >gi|113632071|dbj|BAF25752.1| Os09g0546000 [Oryza sativa Japonica Group]
Unigene10250_Taxus	2	RawIntensity-ye	0.63	8.4	3.73697	0.000106586	0.000376618	-	-	-	gi|30682998|ref|NP_193215.2|/6e-11/ATSUV3; ATP-dependent RNA helicase [Arabidopsis thaliana] >gi|5823579|emb|CAB53782.1| mitochondrial RNA helicase [Arabidopsis thaliana] >gi|22655093|gb|AAM98137.1| RNA helicase like protein [Arabidopsis thaliana] >gi|31711986|gb|AAP68349.1| At4g14790 [Arabidopsis thaliana]
Unigene26163_Taxus	21	RawIntensity-ye	6.66	88.64	3.73436	6.42232e-10	4.78774e-09	-	-	-	-
Unigene32085_Taxus	17	RawIntensity-ye	5.39	71.55	3.73059	9.77594e-09	6.38345e-08	-	-	-	gi|56549229|gb|AAV97732.1|/2e-12/lipid transfer protein [Capsicum chinense] >gi|56549231|gb|AAV97733.1| lipid transfer protein [Capsicum chinense] >gi|56549233|gb|AAV97734.1| lipid transfer protein [Capsicum annuum] >gi|56549235|gb|AAV97735.1| lipid transfer protein [Capsicum annuum]
Unigene23584_Taxus	35	RawIntensity-ye	11.1	147.16	3.72875	1.45217e-13	1.64567e-12	-	-	-	-
Unigene9543_Taxus	19	RawIntensity-ye	6.03	79.37	3.71836	2.51356e-09	1.74987e-08	-	-	-	gi|18424319|ref|NP_568919.1|/2e-45/APRR3 (ARABIDOPSIS PSEUDO-RESPONSE REGULATOR 3); transcription regulator/ two-component response regulator [Arabidopsis thaliana] >gi|52783244|sp|Q9LVG4.1|APRR3_ARATH RecName: Full=Two-component response regulator-like APRR3; AltName: Full=Pseudo-response regulator 3 >gi|10281008|dbj|BAB13744.1| pseudo-response regulator 3 [Arabidopsis thaliana]
Unigene29744_Taxus	3	RawIntensity-ye	0.95	12.46	3.71323	6.40088e-05	0.000235226	-	-	-	-
Unigene3178_Taxus	3	RawIntensity-ye	0.95	12.46	3.71323	6.40088e-05	0.000235178	-	-	-	-
Unigene2314_Taxus	6	RawIntensity-ye	1.9	24.91	3.71265	1.22476e-05	5.18361e-05	-	-	-	gi|115434290|ref|NP_001041903.1|/3e-96/Os01g0127400 [Oryza sativa (japonica cultivar-group)]
Unigene4385_Taxus	7	RawIntensity-ye	2.22	28.97	3.70593	6.70866e-06	2.96996e-05	-	-	-	-
Unigene9197_Taxus	178	RawIntensity-ye	56.44	736.08	3.70507	1.00142e-13	1.1833e-12	-	-	-	-
Unigene21362_Taxus	4	RawIntensity-ye	1.27	16.51	3.70044	3.81388e-05	0.000147095	-	-	-	gi|85813983|emb|CAD20831.2|/4e-48/sigma factor [Spinacia oleracea]
Unigene28499_Taxus	46	RawIntensity-ye	14.59	188.29	3.6899	6.10622e-14	7.59941e-13	-	-	-	-
Unigene31217_Taxus	2	RawIntensity-ye	0.63	8.11	3.68628	0.000107265	0.000378944	-	-	-	gi|226492680|ref|NP_001151385.1|/2e-19/LOC100285018 [Zea mays] >gi|195646350|gb|ACG42643.1| dimethyladenosine transferase [Zea mays]
Unigene16955_Taxus	2	RawIntensity-ye	0.63	8.11	3.68628	0.000107265	0.00037887	-	-	-	gi|222423500|dbj|BAH19720.1|/8e-06/AT1G10657 [Arabidopsis thaliana]
Unigene1452_Taxus	20	RawIntensity-ye	6.34	81.4	3.68247	1.27124e-09	9.14358e-09	-	-	-	gi|6446577|gb|AAD39534.2|/2e-97/cellulose synthase catalytic subunit [Gossypium hirsutum]
Unigene25030_Taxus	26	RawIntensity-ye	8.24	105.44	3.67763	2.1358e-11	1.84168e-10	-	-	-	gi|116792213|gb|ABK26277.1|/6e-11/unknown [Picea sitchensis]
Unigene12327_Taxus	15	RawIntensity-ye	4.76	60.25	3.66193	3.76412e-08	2.29546e-07	GO:0009536//plastid	GO:0004672//protein kinase activity	GO:0044237//cellular metabolic process	gi|224146552|ref|XP_002326048.1|/8e-18/thioredoxin m [Populus trichocarpa] >gi|222862923|gb|EEF00430.1| thioredoxin m [Populus trichocarpa]
Unigene30472_Taxus	6	RawIntensity-ye	1.9	24.04	3.66137	1.22476e-05	5.18117e-05	-	-	-	gi|216296854|gb|ACJ72160.1|/1e-11/UGT3 [Pueraria montana var. lobata]
Unigene13366_Taxus	9	RawIntensity-ye	2.85	35.63	3.64406	1.92748e-06	9.2696e-06	-	-	-	gi|159482266|ref|XP_001699192.1|/3e-07/pseudouridine synthase [Chlamydomonas reinhardtii] >gi|158273039|gb|EDO98832.1| pseudouridine synthase [Chlamydomonas reinhardtii]
Unigene1793_Taxus	25	RawIntensity-ye	7.93	99.07	3.64306	4.1946e-11	3.51588e-10	GO:0005840//ribosome;GO:0009507//chloroplast	GO:0003735//structural constituent of ribosome;GO:0019843//rRNA binding	GO:0006412//translation	gi|75261123|sp|Q6JJ61.1|RK9_IPOTF/6e-06/RecName: Full=50S ribosomal protein L9, chloroplastic; AltName: Full=CL9; Flags: Precursor
Unigene14472_Taxus	12	RawIntensity-ye	3.81	47.51	3.64037	2.76512e-07	1.49164e-06	-	-	-	-
Unigene33621_Taxus	14	RawIntensity-ye	4.44	55.33	3.63943	7.34918e-08	4.30801e-07	-	-	-	gi|30468235|ref|NP_849122.1|/3e-13/ATP synthase CF0 B' subunit [Cyanidioschyzon merolae strain 10D] >gi|75298603|sp|Q85FR1.1|ATPX_CYAME RecName: Full=ATP synthase subunit b', chloroplastic; AltName: Full=ATPase subunit II; AltName: Full=ATP synthase F(0) sector subunit b' >gi|30409335|dbj|BAC76284.1| ATP synthase CF0 B' chain subunit II [Cyanidioschyzon merolae strain 10D]
Unigene25961_Taxus	2	RawIntensity-ye	0.63	7.82	3.63374	0.000108481	0.000383014	-	-	-	-
Unigene7055_Taxus	2	RawIntensity-ye	0.63	7.82	3.63374	0.000108481	0.000382939	-	-	-	gi|111378715|gb|ABH09266.1|/2e-08/KHG/KDPG aldolase [Paulinella chromatophora]
Unigene18807_Taxus	7	RawIntensity-ye	2.22	27.52	3.63185	6.70866e-06	2.97729e-05	-	-	-	gi|159487004|ref|XP_001701526.1|/1e-33/glyoxal or galactose oxidase [Chlamydomonas reinhardtii] >gi|158271587|gb|EDO97403.1| glyoxal or galactose oxidase [Chlamydomonas reinhardtii]
Unigene18243_Taxus	5	RawIntensity-ye	1.59	19.7	3.6311	2.191e-05	8.87047e-05	-	-	-	gi|195620172|gb|ACG31916.1|/3e-24/RHC1A [Zea mays]
Unigene26635_Taxus	90	RawIntensity-ye	28.54	351.09	3.62078	0	0	-	-	-	-
Unigene22485_Taxus	44	RawIntensity-ye	13.95	170.91	3.6149	6.41708e-14	7.95877e-13	-	-	-	-
Unigene9198_Taxus	9	RawIntensity-ye	2.85	34.76	3.60839	1.92748e-06	9.25476e-06	-	-	-	gi|115434238|ref|NP_001041877.1|/4e-08/Os01g0121600 [Oryza sativa (japonica cultivar-group)]
Unigene27211_Taxus	440	RawIntensity-ye	139.53	1694.92	3.60257	0	0	-	-	-	-
Unigene29716_Taxus	9	RawIntensity-ye	2.85	34.47	3.59631	1.92748e-06	9.27456e-06	-	-	-	-
Unigene4560_Taxus	5	RawIntensity-ye	1.59	19.12	3.58798	2.191e-05	8.88646e-05	GO:0005773//vacuole;GO:0005618//cell wall;GO:0005576//extracellular region	GO:0004568//chitinase activity;GO:0043169//cation binding;GO:0003796//lysozyme activity	GO:0006032//chitin catabolic process;GO:0000272//polysaccharide catabolic process	gi|22775366|dbj|BAC11883.1|/7e-21/acidic endochitinase [Crucihimalaya wallichii]
Unigene9845_Taxus	5	RawIntensity-ye	1.59	19.12	3.58798	2.191e-05	8.85652e-05	-	-	-	gi|115469166|ref|NP_001058182.1|/9e-29/Os06g0643900 [Oryza sativa (japonica cultivar-group)] >gi|19879917|gb|AAM00197.1|AF356352_1 acid phosphatase [Oryza sativa] >gi|51535476|dbj|BAD37373.1| acid phosphatase [Oryza sativa Japonica Group] >gi|51535510|dbj|BAD37429.1| acid phosphatase [Oryza sativa Japonica Group] >gi|113596222|dbj|BAF20096.1| Os06g0643900 [Oryza sativa Japonica Group]
Unigene17468_Taxus	19	RawIntensity-ye	6.03	72.42	3.58616	2.51356e-09	1.75462e-08	-	-	-	gi|115483052|ref|NP_001065119.1|/3e-38/Os10g0527800 [Oryza sativa (japonica cultivar-group)] >gi|31433189|gb|AAP54731.1| Glutathione S-transferase, N-terminal domain containing protein, expressed [Oryza sativa (japonica cultivar-group)] >gi|113639728|dbj|BAF27033.1| Os10g0527800 [Oryza sativa Japonica Group]
Unigene8575_Taxus	2	RawIntensity-ye	0.63	7.53	3.57923	0.000110652	0.000390144	-	-	-	-
Unigene4869_Taxus	2	RawIntensity-ye	0.63	7.53	3.57923	0.000110652	0.000390068	GO:0005739//mitochondrion	GO:0008168//methyltransferase activity	-	gi|32394624|gb|AAM94010.1|/2e-14/methyltrasferase [Griffithsia japonica]
Unigene31780_Taxus	19	RawIntensity-ye	6.03	71.84	3.57456	2.51356e-09	1.75598e-08	-	-	-	gi|116783473|gb|ABK22956.1|/3e-12/unknown [Picea sitchensis]
Unigene22773_Taxus	6	RawIntensity-ye	1.9	22.6	3.57225	1.22476e-05	5.17874e-05	-	-	-	-
Unigene14176_Taxus	4	RawIntensity-ye	1.27	15.06	3.56782	3.8139e-05	0.000146907	-	-	-	-
Unigene17659_Taxus	12	RawIntensity-ye	3.81	44.9	3.55885	2.76512e-07	1.49209e-06	-	-	-	gi|224113419|ref|XP_002316491.1|/1e-119/cationic amino acid transporter [Populus trichocarpa] >gi|222865531|gb|EEF02662.1| cationic amino acid transporter [Populus trichocarpa]
Unigene19908_Taxus	13	RawIntensity-ye	4.12	48.38	3.55369	1.42898e-07	8.03369e-07	-	-	-	gi|259149177|emb|CAY82419.1|/3e-08/Npr1p [Saccharomyces cerevisiae EC1118]
Unigene5111_Taxus	6	RawIntensity-ye	1.9	22.31	3.55362	1.22476e-05	5.19093e-05	-	-	-	gi|18390044|gb|AAL68831.1|AF463407_2/8e-74/Enod8.2 [Medicago truncatula]
Unigene30457_Taxus	7	RawIntensity-ye	2.22	25.78	3.53762	6.70866e-06	2.97949e-05	-	-	-	gi|77555056|gb|ABA97852.1|/3e-06/Zinc knuckle family protein [Oryza sativa (japonica cultivar-group)]
Unigene30717_Taxus	7	RawIntensity-ye	2.22	25.78	3.53762	6.70866e-06	2.97435e-05	-	-	-	gi|18400342|ref|NP_565556.1|/7e-13/YCF37 (Arabidopsis homolog of Synechocystis YCF37) [Arabidopsis thaliana] >gi|3152615|gb|AAC17094.1| expressed protein [Arabidopsis thaliana] >gi|16648702|gb|AAL25543.1| At2g23670/F26B6.32 [Arabidopsis thaliana] >gi|20197003|gb|AAM14867.1| expressed protein [Arabidopsis thaliana] >gi|20334912|gb|AAM16212.1| At2g23670/F26B6.32 [Arabidopsis thaliana] >gi|206748360…
Unigene18439_Taxus	13	RawIntensity-ye	4.12	47.8	3.53629	1.42898e-07	8.0362e-07	-	-	-	gi|115464841|ref|NP_001056020.1|/1e-143/Os05g0512200 [Oryza sativa (japonica cultivar-group)] >gi|113579571|dbj|BAF17934.1| Os05g0512200 [Oryza sativa Japonica Group]
Unigene17148_Taxus	3	RawIntensity-ye	0.95	11.01	3.53474	6.4035e-05	0.000235226	-	-	-	-
Unigene24155_Taxus	9	RawIntensity-ye	2.85	33.02	3.53431	1.92748e-06	9.27952e-06	-	-	-	gi|108711913|gb|ABF99708.1|/3e-06/expressed protein [Oryza sativa (japonica cultivar-group)]
Unigene3314_Taxus	84	RawIntensity-ye	26.64	307.64	3.52958	0	0	-	-	-	gi|10178279|emb|CAC08337.1|/1e-137/alpha-galactosidase-like protein [Arabidopsis thaliana]
Unigene4010_Taxus	16	RawIntensity-ye	5.07	58.52	3.52887	1.92114e-08	1.21351e-07	-	-	-	-
Unigene13369_Taxus	2	RawIntensity-ye	0.63	7.24	3.52257	0.000114521	0.000403153	-	-	-	-
Unigene36272_Taxus	2	RawIntensity-ye	0.63	7.24	3.52257	0.000114521	0.000403074	-	-	-	gi|62857206|dbj|BAD95882.1|/3e-66/glucosyltransferase [Ipomoea purpurea]
Unigene31774_Taxus	2	RawIntensity-ye	0.63	7.24	3.52257	0.000114521	0.000402995	-	-	-	gi|2160182|gb|AAB60745.1|/2e-12/ESTs gb|ATTS1236,gb|T43334,gb|N97019,gb|AA395203 come from this gene [Arabidopsis thaliana]
Unigene477_Taxus	2	RawIntensity-ye	0.63	7.24	3.52257	0.000114521	0.000402916	-	-	-	-
Unigene7723_Taxus	7	RawIntensity-ye	2.22	25.49	3.5213	6.70866e-06	2.97289e-05	-	-	-	-
Unigene6453_Taxus	6	RawIntensity-ye	1.9	21.73	3.51562	1.22476e-05	5.17752e-05	-	-	-	gi|115452299|ref|NP_001049750.1|/3e-45/Os03g0283000 [Oryza sativa (japonica cultivar-group)] >gi|113548221|dbj|BAF11664.1| Os03g0283000 [Oryza sativa Japonica Group]
Unigene20332_Taxus	4	RawIntensity-ye	1.27	14.48	3.51116	3.8139e-05	0.000146876	-	-	-	-
Unigene10514_Taxus	4	RawIntensity-ye	1.27	14.48	3.51116	3.8139e-05	0.000146844	-	-	-	gi|9802526|gb|AAF99728.1|AC004557_7/7e-07/F17L21.8 [Arabidopsis thaliana]
Unigene16144_Taxus	3	RawIntensity-ye	0.95	10.72	3.49623	6.40566e-05	0.000235258	-	-	-	-
Unigene15137_Taxus	12	RawIntensity-ye	3.81	42.87	3.49211	2.76512e-07	1.49343e-06	-	-	-	gi|2827704|emb|CAA16677.1|/2e-10/LRR-like protein [Arabidopsis thaliana]
Unigene15195_Taxus	41	RawIntensity-ye	13	146	3.48938	1.26787e-13	1.45514e-12	-	-	-	gi|585467|sp|P37229.1|MDHP2_SORBI/1e-175/RecName: Full=Malate dehydrogenase [NADP] 2, chloroplastic; AltName: Full=NADP-MDH-2; Flags: Precursor >gi|14249|emb|CAA38270.1| malate dehydrogenase (NADP+) [Sorghum bicolor] >gi|7548842|gb|AAB19835.2| NADP-malate dehydrogenase [Sorghum bicolor]
Unigene34455_Taxus	28	RawIntensity-ye	8.88	98.78	3.47559	5.63482e-12	5.20022e-11	-	-	-	gi|115483154|ref|NP_001065170.1|/2e-13/Os10g0536500 [Oryza sativa (japonica cultivar-group)] >gi|31433274|gb|AAP54812.1| expressed protein [Oryza sativa (japonica cultivar-group)] >gi|113639779|dbj|BAF27084.1| Os10g0536500 [Oryza sativa Japonica Group]
Unigene32347_Taxus	105	RawIntensity-ye	33.3	368.76	3.46909	0	0	-	-	-	-
Unigene19768_Taxus	10	RawIntensity-ye	3.17	35.05	3.46686	1.01677e-06	5.08694e-06	-	-	-	gi|115448243|ref|NP_001047901.1|/9e-46/Os02g0711200 [Oryza sativa (japonica cultivar-group)] >gi|113537432|dbj|BAF09815.1| Os02g0711200 [Oryza sativa Japonica Group]
Unigene24563_Taxus	10	RawIntensity-ye	3.17	35.05	3.46686	1.01677e-06	5.08411e-06	-	-	-	-
Unigene3322_Taxus	2	RawIntensity-ye	0.63	6.95	3.46359	0.000121395	0.000423868	-	-	-	gi|124359224|gb|ABN05735.1|/6e-20/Homeobox domain, ZF-HD class; ZF-HD homeobox protein Cys/His-rich dimerisation region; Homeodomain-like [Medicago truncatula] >gi|124360958|gb|ABN08930.1| Homeobox domain, ZF-HD class; ZF-HD homeobox protein Cys/His-rich dimerisation region; Homeodomain-like [Medicago truncatula]
Unigene114_Taxus	2	RawIntensity-ye	0.63	6.95	3.46359	0.000121395	0.000423786	-	-	-	gi|15225223|ref|NP_180789.1|/3e-17/UCC1 (UCLACYANIN 1); copper ion binding / electron carrier [Arabidopsis thaliana] >gi|3399767|gb|AAC32038.1| uclacyanin I [Arabidopsis thaliana]
Unigene33141_Taxus	7	RawIntensity-ye	2.22	24.33	3.4541	6.70866e-06	2.97802e-05	-	-	-	-
Unigene18760_Taxus	4	RawIntensity-ye	1.27	13.9	3.45218	3.81394e-05	0.000146814	-	-	-	-
Unigene14093_Taxus	39	RawIntensity-ye	12.37	134.7	3.44483	9.39248e-14	1.11643e-12	-	-	-	-
Unigene33116_Taxus	18	RawIntensity-ye	5.71	61.99	3.44047	4.96212e-09	3.35961e-08	-	-	-	gi|159468261|ref|XP_001692301.1|/1e-06/heme peroxidase-related protein [Chlamydomonas reinhardtii] >gi|158278487|gb|EDP04251.1| heme peroxidase-related protein [Chlamydomonas reinhardtii]
Unigene30994_Taxus	6	RawIntensity-ye	1.9	20.28	3.41599	1.22476e-05	5.19338e-05	-	-	-	gi|115456725|ref|NP_001051963.1|/3e-07/Os03g0858700 [Oryza sativa (japonica cultivar-group)] >gi|108712209|gb|ABG00004.1| expressed protein [Oryza sativa (japonica cultivar-group)] >gi|113550434|dbj|BAF13877.1| Os03g0858700 [Oryza sativa Japonica Group]
Unigene24038_Taxus	36	RawIntensity-ye	11.42	121.38	3.4099	1.10134e-13	1.28951e-12	-	-	-	-
Unigene21488_Taxus	120	RawIntensity-ye	38.05	402.95	3.40463	0	0	-	-	-	gi|42571589|ref|NP_973885.1|/3e-75/AtUGT85A5 (UDP-glucosyl transferase 85A5); glucuronosyltransferase/ transferase, transferring glycosyl groups [Arabidopsis thaliana] >gi|9392678|gb|AAF87255.1|AC068562_2 Strong similarity to UDP-glucose glucosyltransferase from Arabidopsis thaliana gb|AB016819 and contains a UDP-glucosyl transferase PF|00201 domain. ESTs gb|U74128, gb|AA713257 come from this gene
Unigene8732_Taxus	9	RawIntensity-ye	2.85	30.13	3.40217	1.92748e-06	9.26713e-06	-	-	-	gi|18423226|ref|NP_568749.1|/4e-14/rubredoxin family protein [Arabidopsis thaliana]
Unigene28785_Taxus	2	RawIntensity-ye	0.63	6.66	3.4021	0.000133573	0.000463783	-	-	-	-
Unigene14363_Taxus	2	RawIntensity-ye	0.63	6.66	3.4021	0.000133573	0.000463693	-	-	-	-
Unigene26806_Taxus	11	RawIntensity-ye	3.49	36.79	3.39801	5.32026e-07	2.75997e-06	-	-	-	-
Unigene2946_Taxus	60	RawIntensity-ye	19.03	199.59	3.39069	0	0	-	-	-	gi|115439625|ref|NP_001044092.1|/2e-70/Os01g0720700 [Oryza sativa (japonica cultivar-group)] >gi|75248562|sp|Q8W0E4.1|SAT1_ORYSJ RecName: Full=Probable serine acetyltransferase 1; AltName: Full=OsSERAT1;1 >gi|113533623|dbj|BAF06006.1| Os01g0720700 [Oryza sativa Japonica Group]
Unigene20457_Taxus	44	RawIntensity-ye	13.95	145.71	3.38476	6.41708e-14	7.96426e-13	-	-	-	-
Unigene16071_Taxus	14	RawIntensity-ye	4.44	46.35	3.38394	7.34918e-08	4.31504e-07	-	-	-	-
Unigene812_Taxus	12	RawIntensity-ye	3.81	39.69	3.38091	2.76512e-07	1.4903e-06	-	-	-	gi|115483366|ref|NP_001065353.1|/1e-25/Os10g0556200 [Oryza sativa (japonica cultivar-group)] >gi|31433458|gb|AAP54971.1| Helix-loop-helix DNA-binding domain containing protein, expressed [Oryza sativa (japonica cultivar-group)] >gi|113639885|dbj|BAF27190.1| Os10g0556200 [Oryza sativa Japonica Group]
Unigene8645_Taxus	23	RawIntensity-ye	7.29	75.9	3.38011	1.6377e-10	1.28699e-09	-	-	-	gi|115448753|ref|NP_001048156.1|/1e-29/Os02g0754600 [Oryza sativa (japonica cultivar-group)] >gi|113537687|dbj|BAF10070.1| Os02g0754600 [Oryza sativa Japonica Group]
Unigene7062_Taxus	3	RawIntensity-ye	0.95	9.85	3.37412	6.42826e-05	0.000235895	-	-	-	gi|212717145|gb|ACJ37414.1|/5e-07/protein kinase [Glycine max]
Unigene14344_Taxus	4	RawIntensity-ye	1.27	13.04	3.36004	3.81418e-05	0.000146792	-	-	-	-
Unigene27615_Taxus	5	RawIntensity-ye	1.59	16.22	3.35068	2.19102e-05	8.84468e-05	-	-	-	gi|195646170|gb|ACG42553.1|/2e-08/ATP synthase F1, delta subunit family protein [Zea mays]
Unigene32549_Taxus	76	RawIntensity-ye	24.1	244.49	3.34267	0	0	-	-	-	-
Unigene30996_Taxus	68	RawIntensity-ye	21.56	218.71	3.34259	0	0	-	-	-	gi|116055532|emb|CAL58200.1|/6e-06/Histone deacetylase superfamily (ISS) [Ostreococcus tauri]
Unigene14575_Taxus	2	RawIntensity-ye	0.63	6.37	3.33787	0.000155085	0.000528282	-	-	-	gi|115485457|ref|NP_001067872.1|/1e-06/Os11g0470200 [Oryza sativa (japonica cultivar-group)] >gi|113645094|dbj|BAF28235.1| Os11g0470200 [Oryza sativa Japonica Group]
Unigene4649_Taxus	2	RawIntensity-ye	0.63	6.37	3.33787	0.000155085	0.000528182	-	-	-	gi|116778967|gb|ABK21078.1|/3e-21/unknown [Picea sitchensis]
Unigene27997_Taxus	57	RawIntensity-ye	18.08	182.79	3.33772	2.73114e-14	3.51571e-13	-	-	-	-
Unigene10901_Taxus	9	RawIntensity-ye	2.85	28.68	3.33101	1.92748e-06	9.26465e-06	GO:0009507//chloroplast	GO:0005506//iron ion binding;GO:0004044//amidophosphoribosyltransferase activity;GO:0000287//magnesium ion binding;GO:0051539//4 iron, 4 sulfur cluster binding	GO:0006164//purine nucleotide biosynthetic process;GO:0006541//glutamine metabolic process;GO:0009113//purine base biosynthetic process;GO:0009116//nucleoside metabolic process	gi|50546909|ref|XP_500924.1|/1e-61/YALI0B15304p [Yarrowia lipolytica] >gi|49646790|emb|CAG83175.1| YALI0B15304p [Yarrowia lipolytica]
Unigene35005_Taxus	193	RawIntensity-ye	61.2	614.99	3.32896	9.90318e-14	1.17171e-12	-	-	-	-
Unigene30600_Taxus	51	RawIntensity-ye	16.17	162.22	3.32656	0	0	-	-	-	gi|255677819|dbj|BAF21718.2|/6e-23/Os07g0520800 [Oryza sativa Japonica Group]
Unigene2507_Taxus	14	RawIntensity-ye	4.44	44.32	3.31933	7.34918e-08	4.31363e-07	-	-	-	gi|2352919|gb|AAB69317.1|/1e-159/plastidic glucose-6-phosphate dehydrogenase [Petroselinum crispum]
Unigene27595_Taxus	52	RawIntensity-ye	16.49	163.96	3.31368	2.4869e-14	3.22437e-13	-	-	-	-
Unigene15419_Taxus	6	RawIntensity-ye	1.9	18.83	3.30896	1.22476e-05	5.18239e-05	-	-	-	gi|115487706|ref|NP_001066340.1|/1e-06/Os12g0190200 [Oryza sativa (japonica cultivar-group)] >gi|113648847|dbj|BAF29359.1| Os12g0190200 [Oryza sativa Japonica Group]
Unigene22284_Taxus	80	RawIntensity-ye	25.37	251.15	3.30735	0	0	-	-	-	-
Unigene32725_Taxus	58	RawIntensity-ye	18.39	181.34	3.3017	0	0	-	-	-	gi|255676391|dbj|BAH93166.1|/1e-19/Os05g0429600 [Oryza sativa Japonica Group]
Unigene8310_Taxus	13	RawIntensity-ye	4.12	40.56	3.29934	1.42898e-07	8.00867e-07	-	-	-	gi|82697963|gb|ABB89016.1|/3e-07/CXE carboxylesterase [Actinidia deliciosa]
Unigene32367_Taxus	5	RawIntensity-ye	1.59	15.64	3.29814	2.19102e-05	8.8427e-05	-	-	-	gi|224115768|ref|XP_002332052.1|/9e-06/magnesium transporter [Populus trichocarpa] >gi|222831938|gb|EEE70415.1| magnesium transporter [Populus trichocarpa]
Unigene18827_Taxus	3	RawIntensity-ye	0.95	9.27	3.28657	6.48652e-05	0.000237791	-	-	-	gi|116055868|emb|CAL57953.1|/9e-87/delta 9 desaturase-like protein (ISS) [Ostreococcus tauri]
Unigene26018_Taxus	78	RawIntensity-ye	24.73	241.3	3.28649	0	0	-	-	-	-
Unigene29148_Taxus	259	RawIntensity-ye	82.13	793.44	3.27214	1.19016e-13	1.37914e-12	-	-	-	-
Unigene32238_Taxus	7	RawIntensity-ye	2.22	21.44	3.27167	6.70866e-06	2.97582e-05	-	-	-	-
Unigene10799_Taxus	7	RawIntensity-ye	2.22	21.44	3.27167	6.70866e-06	2.96704e-05	-	-	-	-
Unigene35877_Taxus	2	RawIntensity-ye	0.63	6.08	3.27065	0.000192955	0.000650388	-	-	-	gi|15912313|gb|AAL08290.1|/1e-08/AT5g24690/MXC17_8 [Arabidopsis thaliana]
Unigene10313_Taxus	2	RawIntensity-ye	0.63	6.08	3.27065	0.000192955	0.000650266	-	-	-	gi|520958|emb|CAA81749.1|/1e-83/1-aminocyclopropane-1-carboxylate synthase [Solanum tuberosum]
Unigene35840_Taxus	65	RawIntensity-ye	20.61	196.4	3.25238	0	0	-	-	-	gi|206574938|gb|ACI14382.1|/2e-76/cinnamoyl-CoA reductase [Vaccinium corymbosum]
Unigene1853_Taxus	33	RawIntensity-ye	10.46	99.07	3.24357	3.33956e-13	3.57518e-12	-	-	-	gi|15223391|ref|NP_174585.1|/1e-126/MATE efflux family protein [Arabidopsis thaliana]
Unigene1525_Taxus	19	RawIntensity-ye	6.03	57.07	3.2425	2.51356e-09	1.7553e-08	-	-	-	gi|40362748|gb|AAR84643.1|/8e-06/defensin [Picea glauca]
Unigene29930_Taxus	14	RawIntensity-ye	4.44	42	3.24176	7.34918e-08	4.30941e-07	-	-	-	gi|115449355|ref|NP_001048446.1|/3e-06/Os02g0806000 [Oryza sativa (japonica cultivar-group)] >gi|47497343|dbj|BAD19383.1| GCN5-related N-acetyltransferase (GNAT) family protein-like [Oryza sativa Japonica Group] >gi|47497393|dbj|BAD19431.1| GCN5-related N-acetyltransferase (GNAT) family protein-like [Oryza sativa Japonica Group] >gi|113537977|dbj|BAF10360.1| Os02g0806000 [Oryza sativa Japonica Gr…
Unigene23947_Taxus	20	RawIntensity-ye	6.34	59.96	3.24145	1.27124e-09	9.16189e-09	-	-	-	-
Unigene12402_Taxus	64	RawIntensity-ye	20.29	190.9	3.23398	0	0	GO:0009536//plastid	GO:0034256//chlorophyll(ide) b reductase activity	GO:0015996//chlorophyll catabolic process;GO:0010304//PSII associated light-harvesting complex II catabolic process	gi|239611967|gb|EEQ88954.1|/3e-15/oxidoreductase [Ajellomyces dermatitidis ER-3]
Unigene30979_Taxus	9	RawIntensity-ye	2.85	26.65	3.2251	1.92748e-06	9.25971e-06	-	-	-	gi|115479165|ref|NP_001063176.1|/2e-46/Os09g0416200 [Oryza sativa (japonica cultivar-group)] >gi|113631409|dbj|BAF25090.1| Os09g0416200 [Oryza sativa Japonica Group]
Unigene6641_Taxus	29	RawIntensity-ye	9.2	85.46	3.21554	2.99094e-12	2.84337e-11	-	-	-	-
Unigene33475_Taxus	26	RawIntensity-ye	8.24	76.48	3.21437	2.1358e-11	1.84522e-10	GO:0016023//cytoplasmic membrane-bounded vesicle	GO:0004557//alpha-galactosidase activity	GO:0005975//carbohydrate metabolic process	gi|15241601|ref|NP_196455.1|/2e-21/AtAGAL1 (Arabidopsis thaliana ALPHA-GALACTOSIDASE 1); alpha-galactosidase/ catalytic/ hydrolase, hydrolyzing O-glycosyl compounds >gi|10178280|emb|CAC08338.1| alpha-galactosidase-like protein [Arabidopsis thaliana]
Unigene7081_Taxus	34	RawIntensity-ye	10.78	99.94	3.21271	2.09832e-13	2.31239e-12	-	-	-	gi|79325155|ref|NP_001031662.1|/3e-14/PUP8 (ARABIDOPSIS THALIANA PURINE PERMEASE 8); purine transmembrane transporter [Arabidopsis thaliana] >gi|122230053|sp|Q0WRB9.1|PUP8_ARATH RecName: Full=Probable purine permease 8; Short=AtPUP8
Unigene3009_Taxus	30	RawIntensity-ye	9.51	87.48	3.20144	1.60294e-12	1.56689e-11	-	-	-	gi|255675240|dbj|BAH92532.1|/5e-08/Os04g0226800 [Oryza sativa Japonica Group]
Unigene8266_Taxus	2	RawIntensity-ye	0.63	5.79	3.20014	0.00025938	0.000857737	-	-	-	gi|9759266|dbj|BAB09587.1|/8e-11/diacylglycerol kinase-like protein [Arabidopsis thaliana]
Unigene16407_Taxus	2	RawIntensity-ye	0.63	5.79	3.20014	0.00025938	0.000857579	-	-	-	-
Unigene13963_Taxus	2	RawIntensity-ye	0.63	5.79	3.20014	0.00025938	0.000857421	-	-	-	gi|30680681|ref|NP_680141.2|/1e-138/glycosyl hydrolase family 3 protein [Arabidopsis thaliana]
Unigene5033_Taxus	2	RawIntensity-ye	0.63	5.79	3.20014	0.00025938	0.000857264	-	-	-	-
Unigene6899_Taxus	2	RawIntensity-ye	0.63	5.79	3.20014	0.00025938	0.000857107	-	-	-	-
Unigene19935_Taxus	19	RawIntensity-ye	6.03	55.33	3.19783	2.51356e-09	1.75326e-08	-	-	-	gi|115455231|ref|NP_001051216.1|/2e-26/Os03g0739700 [Oryza sativa (japonica cultivar-group)] >gi|108710985|gb|ABF98780.1| expressed protein [Oryza sativa (japonica cultivar-group)] >gi|113549687|dbj|BAF13130.1| Os03g0739700 [Oryza sativa Japonica Group]
Unigene16270_Taxus	3	RawIntensity-ye	0.95	8.69	3.19336	6.66562e-05	0.000243959	GO:0009535//chloroplast thylakoid membrane	-	-	gi|115489108|ref|NP_001067041.1|/5e-09/Os12g0564400 [Oryza sativa (japonica cultivar-group)] >gi|113649548|dbj|BAF30060.1| Os12g0564400 [Oryza sativa Japonica Group]
Unigene11812_Taxus	40	RawIntensity-ye	12.68	115.58	3.18827	8.37108e-14	1.01857e-12	GO:0005840//ribosome;GO:0009536//plastid	GO:0003735//structural constituent of ribosome;GO:0003723//RNA binding	GO:0006412//translation	gi|242620052|ref|YP_003002056.1|/6e-14/50S ribosomal protein L24 [Aureococcus anophagefferens] >gi|239997297|gb|ACS36820.1| 50S ribosomal protein L24 [Aureococcus anophagefferens]
Unigene15039_Taxus	24	RawIntensity-ye	7.61	68.94	3.17937	8.28216e-11	6.70773e-10	-	-	-	gi|108708531|gb|ABF96326.1|/4e-06/expressed protein [Oryza sativa (japonica cultivar-group)]
Unigene35900_Taxus	21	RawIntensity-ye	6.66	59.96	3.17041	6.42232e-10	4.7937e-09	-	-	-	gi|2191197|gb|AAB61082.1|/6e-06/contains similarity to Synechococcus PCC7942 chromosomal region used as basis of neutral siteII recombinational cloning vector (PID:g1174192) [Arabidopsis thaliana]
Unigene31210_Taxus	127	RawIntensity-ye	40.27	361.52	3.1663	1.22569e-13	1.41213e-12	-	-	-	gi|115455191|ref|NP_001051196.1|/5e-25/Os03g0736700 [Oryza sativa (japonica cultivar-group)] >gi|108710958|gb|ABF98753.1| GRAM domain containing protein, expressed [Oryza sativa (japonica cultivar-group)] >gi|113549667|dbj|BAF13110.1| Os03g0736700 [Oryza sativa Japonica Group]
Unigene3184_Taxus	38	RawIntensity-ye	12.05	107.76	3.16072	7.4607e-14	9.16469e-13	-	-	-	-
Unigene36107_Taxus	5	RawIntensity-ye	1.59	14.19	3.15778	2.19116e-05	8.84128e-05	-	-	-	gi|23495741|dbj|BAC19952.1|/1e-14/aldo/keto reductase family-like protein [Oryza sativa Japonica Group] >gi|24059944|dbj|BAC21407.1| aldo/keto reductase family-like protein [Oryza sativa Japonica Group]
Unigene35031_Taxus	4	RawIntensity-ye	1.27	11.3	3.15342	3.82228e-05	0.00014701	-	-	-	gi|159477050|ref|XP_001696624.1|/2e-11/thylakoid lumenal protein [Chlamydomonas reinhardtii] >gi|158282849|gb|EDP08601.1| thylakoid lumenal protein [Chlamydomonas reinhardtii]
Unigene7769_Taxus	36	RawIntensity-ye	11.42	101.1	3.14615	1.10134e-13	1.29203e-12	-	-	-	-
Unigene4192_Taxus	3	RawIntensity-ye	0.95	8.4	3.14439	6.86446e-05	0.000250777	-	-	-	-
Unigene467_Taxus	19	RawIntensity-ye	6.03	53.3	3.14391	2.51356e-09	1.75734e-08	-	-	-	gi|258575501|ref|XP_002541932.1|/0.0/AMP deaminase 2 [Uncinocarpus reesii 1704] >gi|237902198|gb|EEP76599.1| AMP deaminase 2 [Uncinocarpus reesii 1704]
Unigene31900_Taxus	12	RawIntensity-ye	3.81	33.6	3.1406	2.76512e-07	1.49567e-06	-	-	-	gi|15228208|ref|NP_190349.1|/3e-27/bundle-sheath defective protein 2 family / bsd2 family [Arabidopsis thaliana]
Unigene27003_Taxus	309	RawIntensity-ye	97.99	862.67	3.1381	6.44152e-13	6.60146e-12	-	-	-	gi|226508338|ref|NP_001148977.1|/5e-06/alpha-N-arabinofuranosidase A [Zea mays] >gi|195623744|gb|ACG33702.1| alpha-N-arabinofuranosidase A precursor [Zea mays]
Unigene36059_Taxus	37	RawIntensity-ye	11.73	103.13	3.13619	8.79296e-14	1.05845e-12	-	-	-	gi|226453691|gb|EEH50999.1|/5e-09/heat shock protein 70 with TPR repeat [Micromonas pusilla CCMP1545]
Unigene16100_Taxus	10	RawIntensity-ye	3.17	27.81	3.13305	1.01677e-06	5.08553e-06	-	-	-	-
Unigene33603_Taxus	5	RawIntensity-ye	1.59	13.9	3.12799	2.19128e-05	8.83978e-05	-	-	-	gi|15192933|gb|AAK91641.1|AF377749_1/1e-52/alcohol dehydrogenase [Zea mays subsp. mays]
Unigene23380_Taxus	29	RawIntensity-ye	9.2	80.24	3.12462	2.99094e-12	2.84037e-11	-	-	-	-
Unigene22906_Taxus	4	RawIntensity-ye	1.27	11.01	3.11591	3.82852e-05	0.000147218	-	-	-	-
Unigene19790_Taxus	10	RawIntensity-ye	3.17	27.23	3.10264	1.01677e-06	5.08129e-06	-	-	-	gi|22328974|ref|NP_194472.2|/3e-25/ABC transporter family protein [Arabidopsis thaliana]
Unigene5010_Taxus	23	RawIntensity-ye	7.29	62.57	3.10148	1.6377e-10	1.28755e-09	-	-	-	gi|85540586|gb|ABC70464.1|/1e-15/CASTOR protein [Glycine max]
Unigene17866_Taxus	20	RawIntensity-ye	6.34	53.88	3.0872	1.27124e-09	9.14724e-09	-	-	-	gi|226277579|gb|EEH33145.1|/3e-23/PQ loop repeat protein [Paracoccidioides brasiliensis Pb01]
Unigene12307_Taxus	7	RawIntensity-ye	2.22	18.83	3.0844	6.70868e-06	2.96632e-05	-	-	-	gi|68565236|sp|Q8W571.2|ATL4O_ARATH/6e-21/RecName: Full=RING-H2 finger protein ATL4O; Flags: Precursor
Unigene18460_Taxus	11	RawIntensity-ye	3.49	29.55	3.08186	5.32026e-07	2.76316e-06	-	-	-	gi|255670585|dbj|BAF07746.2|/6e-08/Os02g0137700 [Oryza sativa Japonica Group]
Unigene24675_Taxus	43	RawIntensity-ye	13.64	114.42	3.06842	1.03917e-13	1.22548e-12	-	-	-	-
Unigene24468_Taxus	22	RawIntensity-ye	6.98	58.52	3.06763	3.24314e-10	2.48144e-09	-	-	-	-
Unigene27103_Taxus	55	RawIntensity-ye	17.44	146	3.0655	0	0	-	-	-	-
Unigene17869_Taxus	13	RawIntensity-ye	4.12	34.47	3.06463	1.42898e-07	8.01616e-07	-	-	-	gi|8901180|gb|AAF65464.2|AF247700_1/3e-09/peroxidase POC1 [Oryza sativa Indica Group]
Unigene33489_Taxus	32	RawIntensity-ye	10.15	84.88	3.06394	5.36904e-13	5.59151e-12	-	-	-	gi|18417885|ref|NP_568327.1|/9e-48/hydrolase, alpha/beta fold family protein [Arabidopsis thaliana]
Unigene16295_Taxus	33	RawIntensity-ye	10.46	87.19	3.05928	3.33956e-13	3.56457e-12	GO:0009535//chloroplast thylakoid membrane;GO:0009543//chloroplast thylakoid lumen	-	-	gi|145323868|ref|NP_001077523.1|/4e-06/thylakoid lumenal protein-related [Arabidopsis thaliana]
Unigene21165_Taxus	9	RawIntensity-ye	2.85	23.75	3.05889	1.92748e-06	9.25723e-06	-	-	-	gi|147637465|sp|Q0J9W0.2|CCP11_ORYSJ/4e-24/RecName: Full=Cyclin-P1-1; Short=CycP1;1 >gi|39546240|emb|CAE04249.3| OSJNBa0089N06.10 [Oryza sativa (japonica cultivar-group)]
Unigene10609_Taxus	78	RawIntensity-ye	24.73	204.8	3.04988	0	0	-	-	-	gi|149688570|gb|ABR27730.1|/8e-80/dirigent-like protein [Picea sitchensis]
Unigene21757_Taxus	4	RawIntensity-ye	1.27	10.43	3.03784	3.8581e-05	0.000148229	-	-	-	-
Unigene15141_Taxus	11	RawIntensity-ye	3.49	28.39	3.02408	5.32026e-07	2.76236e-06	-	-	-	-
Unigene12373_Taxus	20	RawIntensity-ye	6.34	51.56	3.0237	1.27124e-09	9.15089e-09	-	-	-	gi|195633101|gb|ACG36734.1|/2e-19/hydrolase, alpha/beta fold family protein [Zea mays]
Unigene11308_Taxus	7	RawIntensity-ye	2.22	17.96	3.01616	6.7087e-06	2.9656e-05	-	-	-	gi|109946535|gb|ABG48446.1|/1e-15/At4g13500 [Arabidopsis thaliana]
Unigene8694_Taxus	17	RawIntensity-ye	5.39	42.87	2.99161	9.77594e-09	6.41136e-08	-	-	-	gi|115441075|ref|NP_001044817.1|/3e-11/Os01g0850900 [Oryza sativa (japonica cultivar-group)] >gi|20805177|dbj|BAB92846.1| SOUL heme-binding protein-like [Oryza sativa Japonica Group] >gi|113534348|dbj|BAF06731.1| Os01g0850900 [Oryza sativa Japonica Group]
Unigene27336_Taxus	162	RawIntensity-ye	51.37	407.58	2.98809	0	0	-	-	-	-
Unigene27851_Taxus	3	RawIntensity-ye	0.95	7.53	2.98665	8.84682e-05	0.000318861	-	-	-	-
Unigene24286_Taxus	3	RawIntensity-ye	0.95	7.53	2.98665	8.84682e-05	0.000318797	-	-	-	-
Unigene8440_Taxus	3	RawIntensity-ye	0.95	7.53	2.98665	8.84682e-05	0.000318733	-	-	-	gi|115446773|ref|NP_001047166.1|/1e-46/Os02g0565400 [Oryza sativa (japonica cultivar-group)] >gi|113536697|dbj|BAF09080.1| Os02g0565400 [Oryza sativa Japonica Group]
Unigene9390_Taxus	6	RawIntensity-ye	1.9	15.06	2.98665	1.22489e-05	5.17567e-05	-	-	-	gi|159463206|ref|XP_001689833.1|/6e-08/plastid lipid associated protein [Chlamydomonas reinhardtii] >gi|158283821|gb|EDP09571.1| plastid lipid associated protein [Chlamydomonas reinhardtii]
Unigene2348_Taxus	6	RawIntensity-ye	1.9	15.06	2.98665	1.22489e-05	5.17446e-05	-	-	-	gi|115475946|ref|NP_001061569.1|/2e-28/Os08g0332700 [Oryza sativa (japonica cultivar-group)] >gi|113623538|dbj|BAF23483.1| Os08g0332700 [Oryza sativa Japonica Group]
Unigene2111_Taxus	66	RawIntensity-ye	20.93	165.41	2.9824	0	0	-	GO:0016787//hydrolase activity	GO:0005975//carbohydrate metabolic process	gi|62149370|dbj|BAD93485.1|/2e-82/pollen major allergen No.121 isoform 2 [Cryptomeria japonica]
Unigene24098_Taxus	122	RawIntensity-ye	38.69	305.61	2.98166	7.59392e-14	9.29029e-13	GO:0009536//plastid	-	-	gi|3776581|gb|AAC64898.1|/8e-06/Similar to Beta integral membrane protein homolog gb|U43629 from A. thaliana [Arabidopsis thaliana]
Unigene16265_Taxus	24	RawIntensity-ye	7.61	59.96	2.97803	8.28216e-11	6.71075e-10	-	-	-	gi|115445721|ref|NP_001046640.1|/3e-13/Os02g0306900 [Oryza sativa (japonica cultivar-group)] >gi|73858555|gb|AAD29703.2|AF140490_1 heat-shock protein DnaJ [Oryza sativa Japonica Group] >gi|113536171|dbj|BAF08554.1| Os02g0306900 [Oryza sativa Japonica Group]
Unigene5376_Taxus	8	RawIntensity-ye	2.54	19.99	2.97638	3.61802e-06	1.67249e-05	-	-	-	gi|115434086|ref|NP_001041801.1|/3e-15/Os01g0111100 [Oryza sativa (japonica cultivar-group)]
Unigene16486_Taxus	113	RawIntensity-ye	35.83	281.86	2.97574	1.8896e-13	2.10039e-12	GO:0009536//plastid	GO:0016829//lyase activity	-	gi|169057|gb|AAA33652.1|/7e-78/carbonic anhydrase [Pisum sativum] >gi|227784|prf||1710354A carbonic anhydrase
Unigene23960_Taxus	5	RawIntensity-ye	1.59	12.46	2.97021	2.19528e-05	8.85394e-05	-	-	-	-
Unigene24742_Taxus	5	RawIntensity-ye	1.59	12.46	2.97021	2.19528e-05	8.85195e-05	-	-	-	-
Unigene3097_Taxus	14	RawIntensity-ye	4.44	34.76	2.9688	7.34918e-08	4.31644e-07	-	-	-	gi|42541167|gb|AAS19475.1|/9e-60/MYB1 [Tradescantia fluminensis]
Unigene18942_Taxus	13	RawIntensity-ye	4.12	32.15	2.9641	1.42898e-07	8.01866e-07	-	-	-	gi|115462531|ref|NP_001054865.1|/5e-85/Os05g0196200 [Oryza sativa (japonica cultivar-group)]
Unigene13227_Taxus	6	RawIntensity-ye	1.9	14.77	2.9586	1.225e-05	5.17367e-05	-	-	-	gi|115464151|ref|NP_001055675.1|/4e-06/Os05g0443500 [Oryza sativa (japonica cultivar-group)] >gi|505136|dbj|BAA06456.1| ferredoxin [Oryza sativa Japonica Group] >gi|53749244|gb|AAU90104.1| ferredoxin [Oryza sativa Japonica Group] >gi|53981560|gb|AAV24967.1| ferredoxin [Oryza sativa Japonica Group] >gi|113579226|dbj|BAF17589.1| Os05g0443500 [Oryza sativa Japonica Group]
Unigene9324_Taxus	6	RawIntensity-ye	1.9	14.77	2.9586	1.225e-05	5.17246e-05	-	-	-	gi|159467236|ref|XP_001691804.1|/3e-06/clp protease adaptor protein [Chlamydomonas reinhardtii] >gi|158279150|gb|EDP04912.1| clp protease adaptor protein [Chlamydomonas reinhardtii]
Unigene15715_Taxus	19	RawIntensity-ye	6.03	46.64	2.95134	2.51356e-09	1.75666e-08	-	-	-	gi|283136054|gb|ADB11346.1|/1e-42/tau class glutathione transferase GSTU4 [Populus trichocarpa]
Unigene5230_Taxus	171	RawIntensity-ye	54.23	416.27	2.94036	3.35954e-13	3.58165e-12	GO:0016023//cytoplasmic membrane-bounded vesicle	-	GO:0006412//translation	gi|30693047|ref|NP_174696.2|/8e-08/translation initiation factor 3 (IF-3) family protein [Arabidopsis thaliana] >gi|45773942|gb|AAS76775.1| At1g34360 [Arabidopsis thaliana]
Unigene34371_Taxus	59	RawIntensity-ye	18.71	143.39	2.93806	3.10862e-15	4.37053e-14	-	-	-	gi|226508898|ref|NP_001148518.1|/5e-46/malate dehydrogenase, glyoxysomal [Zea mays] >gi|195619966|gb|ACG31813.1| malate dehydrogenase, glyoxysomal precursor [Zea mays]
Unigene3761_Taxus	5	RawIntensity-ye	1.59	12.17	2.93623	2.19836e-05	8.86238e-05	-	-	-	gi|32171918|sp|Q9LXB4.1|Y5620_ARATH/4e-13/RecName: Full=Putative RNA methyltransferase At5g10620
Unigene16856_Taxus	8	RawIntensity-ye	2.54	19.41	2.9339	3.61804e-06	1.67207e-05	-	-	-	gi|225216879|gb|ACN85177.1|/1e-40/aspartic proteinase nepenthesin-1 precursor [Oryza nivara] >gi|225216896|gb|ACN85193.1| aspartic proteinase nepenthesin-1 precursor [Oryza rufipogon]
Unigene13566_Taxus	3	RawIntensity-ye	0.95	7.24	2.92999	0.000106321	0.000375831	-	-	-	gi|224101849|ref|XP_002312444.1|/0.0/sulfate/bicarbonate/oxalate exchanger and transporter sat-1 [Populus trichocarpa] >gi|222852264|gb|EEE89811.1| sulfate/bicarbonate/oxalate exchanger and transporter sat-1 [Populus trichocarpa]
Unigene17017_Taxus	3	RawIntensity-ye	0.95	7.24	2.92999	0.000106321	0.000375757	-	-	-	-
Unigene13957_Taxus	16	RawIntensity-ye	5.07	38.53	2.92592	1.92114e-08	1.21266e-07	-	-	-	gi|116786296|gb|ABK24055.1|/3e-07/unknown [Picea sitchensis]
Unigene10600_Taxus	13	RawIntensity-ye	4.12	31.29	2.92499	1.42898e-07	8.02116e-07	-	-	-	-
Unigene2571_Taxus	25	RawIntensity-ye	7.93	59.96	2.91861	4.1946e-11	3.51425e-10	-	-	-	-
Unigene15368_Taxus	4	RawIntensity-ye	1.27	9.56	2.91218	4.04206e-05	0.000154702	-	-	-	gi|38569178|emb|CAE75962.1|/4e-19/OJ000315_02.20 [Oryza sativa (japonica cultivar-group)]
Unigene11508_Taxus	4	RawIntensity-ye	1.27	9.56	2.91218	4.04206e-05	0.000154669	-	-	-	-
Unigene1415_Taxus	95	RawIntensity-ye	30.13	225.08	2.90117	5.9952e-15	8.21078e-14	-	-	-	gi|195651995|gb|ACG45465.1|/2e-55/phospholipid hydroperoxide glutathione peroxidase [Zea mays]
Unigene20105_Taxus	6	RawIntensity-ye	1.9	14.19	2.9008	1.22547e-05	5.17324e-05	-	-	-	gi|224005439|ref|XP_002291680.1|/2e-36/MFS transporter [Thalassiosira pseudonana CCMP1335] >gi|220972199|gb|EED90531.1| MFS transporter [Thalassiosira pseudonana CCMP1335]
Unigene30268_Taxus	53	RawIntensity-ye	16.81	125.43	2.89949	5.10702e-15	7.0426e-14	-	-	-	-
Unigene11248_Taxus	7	RawIntensity-ye	2.22	16.51	2.89471	6.70908e-06	2.96504e-05	-	-	-	gi|31432749|gb|AAP54342.1|/2e-09/Uncharacterized ACR, COG1678 family protein, expressed [Oryza sativa (japonica cultivar-group)]
Unigene20198_Taxus	24	RawIntensity-ye	7.61	56.49	2.89203	8.28216e-11	6.72286e-10	-	-	-	gi|6321459|ref|NP_011537.1|/4e-06/Mtl1p [Saccharomyces cerevisiae] >gi|1723652|sp|P53214.1|MTL1_YEAST RecName: Full=Protein MTL1; AltName: Full=MID two-like protein 1; Flags: Precursor >gi|285812218|tpg|DAA08118.1| TPA: Mtl1p [Saccharomyces cerevisiae]
Unigene20079_Taxus	9	RawIntensity-ye	2.85	21.15	2.89162	1.92748e-06	9.24491e-06	GO:0044464//cell part	-	-	gi|145079082|tpg|DAA05897.1|/3e-58/TPA: TPA_inf: chloroplast light-harvesting protein CP29 precursor Lhcb4 [Acetabularia acetabulum]
Unigene1008_Taxus	21	RawIntensity-ye	6.66	48.96	2.87801	6.42232e-10	4.79967e-09	-	-	-	gi|186500512|ref|NP_001118322.1|/6e-35/plant basic secretory protein (BSP) family protein [Arabidopsis thaliana]
Unigene12908_Taxus	61	RawIntensity-ye	19.34	141.65	2.87267	1.5099e-14	2.00385e-13	-	-	-	gi|15241248|ref|NP_200466.1|/1e-06/OXS3 (OXIDATIVE STRESS 3) [Arabidopsis thaliana]
Unigene9480_Taxus	3	RawIntensity-ye	0.95	6.95	2.87101	0.000136949	0.000471232	-	-	-	-
Unigene31826_Taxus	3	RawIntensity-ye	0.95	6.95	2.87101	0.000136949	0.000471142	-	-	-	-
Unigene6250_Taxus	4	RawIntensity-ye	1.27	9.27	2.86774	4.20608e-05	0.000160638	-	-	-	gi|116058771|emb|CAL54478.1|/7e-09/RAVE (regulator of V-ATPase assembly) complex subunit RAV1/DMX protein, WD repeat superfamily (ISS) [Ostreococcus tauri]
Unigene15574_Taxus	174	RawIntensity-ye	55.18	402.37	2.86631	1.19904e-13	1.38765e-12	-	-	-	gi|216373865|gb|ACJ72632.1|/3e-20/hypothetical protein [Taxodium distichum var. imbricatum]
Unigene28_Taxus	5	RawIntensity-ye	1.59	11.59	2.86578	2.21268e-05	8.91812e-05	-	-	-	gi|151944114|gb|EDN62407.1|/5e-31/GTPase [Saccharomyces cerevisiae YJM789]
Unigene9763_Taxus	37	RawIntensity-ye	11.73	85.46	2.86505	8.79296e-14	1.05987e-12	-	-	-	gi|226456273|gb|EEH53574.1|/3e-11/fanciful K+ uptake-b family [Micromonas pusilla CCMP1545]
Unigene30780_Taxus	17	RawIntensity-ye	5.39	39.11	2.85918	9.77594e-09	6.40203e-08	-	-	-	-
Unigene3151_Taxus	20	RawIntensity-ye	6.34	45.77	2.85185	1.27124e-09	9.13993e-09	-	-	-	gi|255678900|dbj|BAH94567.1|/3e-06/Os09g0416600 [Oryza sativa Japonica Group]
Unigene26065_Taxus	38	RawIntensity-ye	12.05	86.9	2.85032	7.4607e-14	9.14596e-13	-	-	-	-
Unigene6009_Taxus	8	RawIntensity-ye	2.54	18.25	2.845	3.6181e-06	1.67166e-05	-	-	-	gi|116786536|gb|ABK24148.1|/6e-12/unknown [Picea sitchensis]
Unigene3069_Taxus	8	RawIntensity-ye	2.54	18.25	2.845	3.6181e-06	1.67124e-05	-	-	-	-
Unigene22457_Taxus	22	RawIntensity-ye	6.98	50.11	2.8438	3.24314e-10	2.48461e-09	-	-	-	-
Unigene1992_Taxus	14	RawIntensity-ye	4.44	31.86	2.84311	7.34918e-08	4.3038e-07	-	-	-	gi|53791839|dbj|BAD53905.1|/2e-22/RING zinc finger protein-like [Oryza sativa Japonica Group] >gi|53793216|dbj|BAD54441.1| RING zinc finger protein-like [Oryza sativa Japonica Group]
Unigene21489_Taxus	39	RawIntensity-ye	12.37	88.35	2.83638	9.39248e-14	1.11938e-12	-	-	-	gi|199430494|emb|CAG85869.2|/1e-101/DEHA2C03234p [Debaryomyces hansenii]
Unigene31181_Taxus	53	RawIntensity-ye	16.81	119.35	2.82781	5.10702e-15	7.048e-14	-	-	-	-
Unigene26680_Taxus	76	RawIntensity-ye	24.1	170.62	2.82368	0	0	-	-	-	-
Unigene13147_Taxus	4	RawIntensity-ye	1.27	8.98	2.82189	4.48596e-05	0.000170783	-	-	-	-
Unigene16513_Taxus	4	RawIntensity-ye	1.27	8.98	2.82189	4.48596e-05	0.000170747	-	-	-	gi|115479449|ref|NP_001063318.1|/3e-24/Os09g0448900 [Oryza sativa (japonica cultivar-group)]
Unigene20146_Taxus	14	RawIntensity-ye	4.44	31.29	2.81707	7.34918e-08	4.30661e-07	-	-	-	gi|62122633|dbj|BAD93290.1|/1e-103/beta-amylase [Glycine max]
Unigene26172_Taxus	7	RawIntensity-ye	2.22	15.64	2.81661	6.7107e-06	2.96503e-05	-	-	-	-
Unigene36068_Taxus	3	RawIntensity-ye	0.95	6.66	2.80952	0.000189277	0.000639788	-	-	-	gi|282154872|dbj|BAI60054.1|/2e-36/red chlorophyll catabolite reductase [Brassica oleracea]
Unigene10542_Taxus	18	RawIntensity-ye	5.71	39.98	2.80772	4.96212e-09	3.36087e-08	-	-	-	-
Unigene23287_Taxus	14	RawIntensity-ye	4.44	31	2.80364	7.34918e-08	4.301e-07	-	-	-	gi|115481736|ref|NP_001064461.1|/1e-09/Os10g0370800 [Oryza sativa (japonica cultivar-group)] >gi|19920188|gb|AAM08620.1|AC107314_11 Putative Glucan 1,3-beta-glucosidase precursor [Oryza sativa Japonica Group] >gi|31431641|gb|AAP53385.1| Cellulase containing protein, expressed [Oryza sativa (japonica cultivar-group)] >gi|113639070|dbj|BAF26375.1| Os10g0370800 [Oryza sativa Japonica Group]
Unigene20209_Taxus	63	RawIntensity-ye	19.98	139.34	2.80198	0	0	-	-	-	gi|115444097|ref|NP_001045828.1|/6e-06/Os02g0137200 [Oryza sativa (japonica cultivar-group)] >gi|113535359|dbj|BAF07742.1| Os02g0137200 [Oryza sativa Japonica Group]
Unigene10321_Taxus	8	RawIntensity-ye	2.54	17.67	2.7984	3.61822e-06	1.67086e-05	-	-	-	gi|148910082|gb|ABR18123.1|/1e-10/unknown [Picea sitchensis]
Unigene8030_Taxus	8	RawIntensity-ye	2.54	17.67	2.7984	3.61822e-06	1.67043e-05	-	-	-	gi|255675028|dbj|BAH92429.1|/1e-23/Os03g0834050 [Oryza sativa Japonica Group]
Unigene15987_Taxus	45	RawIntensity-ye	14.27	99.07	2.79546	0	0	-	-	-	gi|226454526|gb|EEH51832.1|/4e-23/glycosyltransferase family 4 protein [Micromonas pusilla CCMP1545]
Unigene35642_Taxus	12	RawIntensity-ye	3.81	26.36	2.79049	2.76512e-07	1.49478e-06	-	-	-	gi|112837|sp|P26690.1|6DCS_SOYBN/3e-71/RecName: Full=NAD(P)H-dependent 6'-deoxychalcone synthase >gi|18728|emb|CAA39261.1| NAD(P)H dependent 6'-deoxychalcone synthase; reductase [Glycine max]
Unigene32822_Taxus	33	RawIntensity-ye	10.46	72.13	2.78572	3.33956e-13	3.56881e-12	-	-	-	gi|156186249|gb|ABU55395.1|/4e-10/xylanase inhibitor 602OS [Triticum aestivum]
Unigene36177_Taxus	6	RawIntensity-ye	1.9	13.04	2.77887	1.23081e-05	5.19336e-05	-	-	-	gi|115455231|ref|NP_001051216.1|/7e-25/Os03g0739700 [Oryza sativa (japonica cultivar-group)] >gi|108710985|gb|ABF98780.1| expressed protein [Oryza sativa (japonica cultivar-group)] >gi|113549687|dbj|BAF13130.1| Os03g0739700 [Oryza sativa Japonica Group]
Unigene8411_Taxus	6	RawIntensity-ye	1.9	13.04	2.77887	1.23081e-05	5.19215e-05	-	-	-	gi|157101240|dbj|BAF79951.1|/6e-10/receptor-like kinase [Marchantia polymorpha]
Unigene27254_Taxus	6	RawIntensity-ye	1.9	13.04	2.77887	1.23081e-05	5.19093e-05	-	-	-	-
Unigene6396_Taxus	6	RawIntensity-ye	1.9	13.04	2.77887	1.23081e-05	5.18971e-05	-	-	-	-
Unigene19609_Taxus	9	RawIntensity-ye	2.85	19.41	2.76777	1.92751e-06	9.2426e-06	-	-	-	gi|115485571|ref|NP_001067929.1|/2e-44/Os11g0491400 [Oryza sativa (japonica cultivar-group)] >gi|77551061|gb|ABA93858.1| expressed protein [Oryza sativa (japonica cultivar-group)] >gi|113645151|dbj|BAF28292.1| Os11g0491400 [Oryza sativa Japonica Group]
Unigene361_Taxus	7	RawIntensity-ye	2.22	15.06	2.76209	6.71452e-06	2.96599e-05	-	-	-	-
Unigene8495_Taxus	1013	RawIntensity-ye	321.23	2178.4	2.76159	3.62266e-12	3.41505e-11	-	-	-	gi|151515259|gb|ABS12332.1|/5e-20/dehydrin [Populus tremula var. davidiana]
Unigene35541_Taxus	13	RawIntensity-ye	4.12	27.81	2.75489	1.42898e-07	8.03872e-07	-	-	-	gi|218511836|sp|Q6BYP9.2|SQS1_DEBHA/1e-05/RecName: Full=Protein SQS1 >gi|199429010|emb|CAG84626.2| DEHA2A07810p [Debaryomyces hansenii]
Unigene20123_Taxus	13	RawIntensity-ye	4.12	27.81	2.75489	1.42898e-07	8.03118e-07	-	-	-	gi|255081947|ref|XP_002508192.1|/7e-14/major facilitator superfamily [Micromonas sp. RCC299] >gi|226523468|gb|ACO69450.1| major facilitator superfamily [Micromonas sp. RCC299]
Unigene4282_Taxus	5	RawIntensity-ye	1.59	10.72	2.75321	2.2988e-05	9.21979e-05	-	-	-	gi|62733494|gb|AAX95611.1|/3e-09/plant-specific FAD-dependent oxidoreductase [Oryza sativa Japonica Group]
Unigene4274_Taxus	5	RawIntensity-ye	1.59	10.72	2.75321	2.2988e-05	9.21774e-05	-	-	-	gi|18415709|ref|NP_567629.1|/3e-06/F-box family protein [Arabidopsis thaliana] >gi|142989915|sp|O65416.2|SKI27_ARATH RecName: Full=F-box protein SKIP27; AltName: Full=SKP1-interacting partner 27 >gi|117168229|gb|ABK32197.1| At4g21510 [Arabidopsis thaliana]
Unigene4176_Taxus	8	RawIntensity-ye	2.54	17.09	2.75025	3.6186e-06	1.67018e-05	-	-	-	-
Unigene20806_Taxus	6	RawIntensity-ye	1.9	12.75	2.74643	1.23504e-05	5.20389e-05	-	-	-	gi|79403782|ref|NP_188249.3|/2e-27/DNA binding / transcription factor [Arabidopsis thaliana] >gi|2062174|gb|AAB63648.1| transcription factor (TINY) isolog [Arabidopsis thaliana] >gi|62736896|gb|AAX97731.1| AP2/EREBP transcription factor family protein [Arabidopsis thaliana]
Unigene36370_Taxus	3	RawIntensity-ye	0.95	6.37	2.74529	0.000278282	0.000914864	-	-	-	gi|15221382|ref|NP_177616.1|/2e-96/nodulin family protein [Arabidopsis thaliana] >gi|5882744|gb|AAD55297.1|AC008263_28 Strong similarity to gb|AF031243 nodule-specific protein (Nlj70) from Lotus japonicus and is a member of the PF|00083 Sugar (and other) transporter family. EST gb|Z37715 comes from this gene [Arabidopsis thaliana]
Unigene33436_Taxus	3	RawIntensity-ye	0.95	6.37	2.74529	0.000278282	0.000914696	-	GO:0016788//hydrolase activity, acting on ester bonds	-	gi|2098713|gb|AAB57671.1|/5e-56/pectinesterase [Citrus sinensis]
Unigene36294_Taxus	12	RawIntensity-ye	3.81	25.49	2.74207	2.76512e-07	1.49433e-06	-	-	-	gi|45861215|gb|AAS78484.1|/3e-35/CCAAT-box transcription factor complex WHAP10 [Triticum aestivum]
Unigene31622_Taxus	10	RawIntensity-ye	3.17	21.15	2.7381	1.01677e-06	5.07426e-06	-	-	-	-
Unigene34009_Taxus	7	RawIntensity-ye	2.22	14.77	2.73404	6.7186e-06	2.96707e-05	-	-	-	gi|84314023|gb|ABC55648.1|/1e-22/MYB transcription factor [Hevea brasiliensis]
Unigene32326_Taxus	12	RawIntensity-ye	3.81	25.2	2.72556	2.76512e-07	1.49388e-06	-	-	-	gi|115475587|ref|NP_001061390.1|/2e-28/Os08g0260600 [Oryza sativa (japonica cultivar-group)] >gi|113623359|dbj|BAF23304.1| Os08g0260600 [Oryza sativa Japonica Group]
Unigene29172_Taxus	4	RawIntensity-ye	1.27	8.4	2.72556	5.76888e-05	0.000216465	-	-	-	-
Unigene1283_Taxus	13	RawIntensity-ye	4.12	27.23	2.72448	1.42898e-07	8.02367e-07	-	-	-	-
Unigene3975_Taxus	13	RawIntensity-ye	4.12	27.23	2.72448	1.42898e-07	8.01117e-07	-	-	-	gi|115455473|ref|NP_001051337.1|/3e-92/Os03g0758900 [Oryza sativa (japonica cultivar-group)] >gi|33519192|gb|AAQ20911.1| WRKY11 [Oryza sativa Japonica Group] >gi|108711194|gb|ABF98989.1| WRKY DNA binding domain containing protein, expressed [Oryza sativa (japonica cultivar-group)] >gi|113549808|dbj|BAF13251.1| Os03g0758900 [Oryza sativa Japonica Group]
Unigene20244_Taxus	23	RawIntensity-ye	7.29	48.09	2.72175	1.6377e-10	1.28586e-09	-	GO:0003676//nucleic acid binding	-	gi|2331131|gb|AAB66884.1|/1e-12/glycine-rich protein [Oryza sativa Japonica Group]
Unigene19019_Taxus	10	RawIntensity-ye	3.17	20.86	2.71818	1.01677e-06	5.07288e-06	-	-	-	gi|6979913|gb|AAF34650.1|AF221526_1/4e-23/prunasin hydrolase isoform PHA precursor [Prunus serotina]
Unigene30113_Taxus	23	RawIntensity-ye	7.29	47.8	2.71302	1.6377e-10	1.28811e-09	-	-	-	gi|15222021|ref|NP_175329.1|/4e-08/glycine-rich protein / oleosin [Arabidopsis thaliana] >gi|7770342|gb|AAF69712.1|AC016041_17 F27J15.22 [Arabidopsis thaliana]
Unigene21460_Taxus	57	RawIntensity-ye	18.08	118.48	2.71218	2.73114e-14	3.51319e-13	-	-	-	gi|255674614|dbj|BAF12346.2|/7e-12/Os03g0432900 [Oryza sativa Japonica Group]
Unigene6738_Taxus	51	RawIntensity-ye	16.17	105.73	2.70899	0	0	-	-	-	gi|168047373|ref|XP_001776145.1|/2e-22/predicted protein [Physcomitrella patens subsp. patens] >gi|162672520|gb|EDQ59056.1| predicted protein [Physcomitrella patens subsp. patens]
Unigene12207_Taxus	8	RawIntensity-ye	2.54	16.51	2.70044	3.61966e-06	1.67024e-05	-	-	-	gi|115441655|ref|NP_001045107.1|/2e-17/Os01g0900900 [Oryza sativa (japonica cultivar-group)] >gi|113534638|dbj|BAF07021.1| Os01g0900900 [Oryza sativa Japonica Group]
Unigene36322_Taxus	36	RawIntensity-ye	11.42	73.87	2.69343	1.10134e-13	1.287e-12	-	-	-	gi|30698272|ref|NP_851285.1|/5e-23/ABA1 (ABA DEFICIENT 1); zeaxanthin epoxidase [Arabidopsis thaliana] >gi|9758548|dbj|BAB08942.1| zeaxanthin epoxidase precursor [Arabidopsis thaliana] >gi|20260492|gb|AAM13144.1| zeaxanthin epoxidase precursor [Arabidopsis thaliana]
Unigene28490_Taxus	17	RawIntensity-ye	5.39	34.76	2.68907	9.77594e-09	6.4137e-08	-	-	-	-
Unigene26319_Taxus	195	RawIntensity-ye	61.84	398.31	2.68728	2.44916e-13	2.67446e-12	-	-	-	-
Unigene26505_Taxus	24	RawIntensity-ye	7.61	48.96	2.68564	8.28216e-11	6.7168e-10	GO:0016020//membrane	GO:0005215//transporter activity	GO:0006810//transport	gi|61613085|gb|AAX47308.1|/5e-06/hexose transporter 7 [Vitis vinifera]
Unigene28767_Taxus	30	RawIntensity-ye	9.51	61.12	2.68413	1.60294e-12	1.5686e-11	-	-	-	-
Unigene25441_Taxus	6	RawIntensity-ye	1.9	12.17	2.67926	1.25421e-05	5.2797e-05	-	-	-	gi|116784639|gb|ABK23417.1|/4e-07/unknown [Picea sitchensis]
Unigene36061_Taxus	26	RawIntensity-ye	8.24	52.72	2.67763	2.1358e-11	1.84345e-10	-	-	-	gi|18418200|ref|NP_568342.1|/4e-07/ENH1 (enhancer of sos3-1); electron carrier/ metal ion binding / protein binding [Arabidopsis thaliana]
Unigene7516_Taxus	17	RawIntensity-ye	5.39	34.47	2.67698	9.77594e-09	6.40436e-08	-	-	-	-
Unigene17526_Taxus	17	RawIntensity-ye	5.39	34.47	2.67698	9.77594e-09	6.38576e-08	-	-	-	gi|95113964|gb|ABF55516.1|/3e-08/chloroplast At1g16080 protein [Helianthus annuus]
Unigene1324_Taxus	11	RawIntensity-ye	3.49	22.31	2.67639	5.32028e-07	2.75839e-06	-	-	-	gi|38567872|emb|CAE03021.3|/2e-15/OSJNBa0091D06.14 [Oryza sativa (japonica cultivar-group)]
Unigene62_Taxus	7	RawIntensity-ye	2.22	14.19	2.67624	6.73702e-06	2.97374e-05	-	-	-	gi|138996985|dbj|BAF52855.1|/3e-15/repressor of silencing 1 [Nicotiana tabacum]
Unigene17383_Taxus	4	RawIntensity-ye	1.27	8.11	2.67487	7.13118e-05	0.00025952	-	-	-	-
Unigene20045_Taxus	8	RawIntensity-ye	2.54	16.22	2.67487	3.62078e-06	1.67033e-05	-	-	-	-
Unigene17438_Taxus	4	RawIntensity-ye	1.27	8.11	2.67487	7.13118e-05	0.000259468	-	-	-	gi|224054952|ref|XP_002298392.1|/0.0/white-brown-complex ABC transporter family [Populus trichocarpa] >gi|222845650|gb|EEE83197.1| white-brown-complex ABC transporter family [Populus trichocarpa]
Unigene35503_Taxus	8	RawIntensity-ye	2.54	16.22	2.67487	3.62078e-06	1.6699e-05	-	-	-	gi|151943106|gb|EDN61441.1|/7e-11/DL-glycerol-3-phosphatase [Saccharomyces cerevisiae YJM789] >gi|190406273|gb|EDV09540.1| DL-glycerol-3-phosphatase [Saccharomyces cerevisiae RM11-1a] >gi|207344308|gb|EDZ71495.1| YIL053Wp-like protein [Saccharomyces cerevisiae AWRI1631]
Unigene15342_Taxus	8	RawIntensity-ye	2.54	16.22	2.67487	3.62078e-06	1.66947e-05	-	-	-	-
Unigene7433_Taxus	5	RawIntensity-ye	1.59	10.14	2.67296	2.50082e-05	0.000100011	-	-	-	gi|148908365|gb|ABR17296.1|/9e-07/unknown [Picea sitchensis]
Unigene15168_Taxus	5	RawIntensity-ye	1.59	10.14	2.67296	2.50082e-05	9.99884e-05	-	-	-	-
Unigene20802_Taxus	37	RawIntensity-ye	11.73	74.74	2.67168	8.79296e-14	1.06058e-12	-	-	-	gi|115480305|ref|NP_001063746.1|/2e-06/Os09g0530000 [Oryza sativa (japonica cultivar-group)] >gi|113631979|dbj|BAF25660.1| Os09g0530000 [Oryza sativa Japonica Group]
Unigene4879_Taxus	19	RawIntensity-ye	6.03	38.24	2.66485	2.51356e-09	1.75394e-08	GO:0009536//plastid;GO:0016020//membrane	-	-	gi|141332|sp|P15811.1|YCF49_CYAPA/8e-07/RecName: Full=Uncharacterized protein ycf49; AltName: Full=ORF102 >gi|1016145|gb|AAA81232.1| orf102 [Cyanophora paradoxa]
Unigene18630_Taxus	35	RawIntensity-ye	11.1	70.1	2.65885	1.45217e-13	1.64671e-12	-	-	-	gi|115448187|ref|NP_001047873.1|/1e-41/Os02g0706900 [Oryza sativa (japonica cultivar-group)]
Unigene33538_Taxus	41	RawIntensity-ye	13	81.69	2.65165	1.26787e-13	1.45237e-12	-	-	-	-
Unigene22424_Taxus	97	RawIntensity-ye	30.76	193.22	2.65112	5.75096e-14	7.1971e-13	-	-	-	-
Unigene13012_Taxus	31	RawIntensity-ye	9.83	61.7	2.65001	8.99946e-13	9.05785e-12	-	-	-	gi|116060978|emb|CAL56366.1|/2e-06/COG1357: Uncharacterized low-complexity proteins (ISS) [Ostreococcus tauri]
Unigene1967_Taxus	6	RawIntensity-ye	1.9	11.88	2.64446	1.2744e-05	5.36219e-05	-	-	-	gi|262102816|gb|EEY60868.1|/2e-94/WD repeat protein pop3 [Phytophthora infestans T30-4]
Unigene27564_Taxus	12	RawIntensity-ye	3.81	23.75	2.64006	2.76512e-07	1.49523e-06	-	-	-	-
Unigene36237_Taxus	16	RawIntensity-ye	5.07	31.58	2.63895	1.92114e-08	1.21223e-07	-	-	-	gi|116055753|emb|CAL57838.1|/9e-18/OJ1076_H08.5 gene product (ISS) [Ostreococcus tauri]
Unigene16269_Taxus	20	RawIntensity-ye	6.34	39.4	2.63564	1.27124e-09	9.15822e-09	-	-	-	gi|116783334|gb|ABK22897.1|/4e-06/unknown [Picea sitchensis]
Unigene33456_Taxus	71	RawIntensity-ye	22.51	139.63	2.63297	0	0	GO:0009535//chloroplast thylakoid membrane	-	-	gi|28207763|gb|AAO32624.1|/5e-19/CR084 protein [Chlamydomonas reinhardtii]
Unigene7474_Taxus	5	RawIntensity-ye	1.59	9.85	2.6311	2.71386e-05	0.000108098	-	-	-	-
Unigene271_Taxus	13	RawIntensity-ye	4.12	25.49	2.62922	1.42898e-07	8.0037e-07	-	-	-	-
Unigene21090_Taxus	8	RawIntensity-ye	2.54	15.64	2.62234	3.6258e-06	1.67093e-05	-	-	-	gi|168024932|ref|XP_001764989.1|/1e-75/predicted protein [Physcomitrella patens subsp. patens] >gi|162683798|gb|EDQ70205.1| predicted protein [Physcomitrella patens subsp. patens]
Unigene32558_Taxus	19	RawIntensity-ye	6.03	37.08	2.62041	2.51356e-09	1.7519e-08	-	-	-	gi|21426919|gb|AAM49597.2|/9e-65/chitinase [Leucaena leucocephala]
Unigene3443_Taxus	7	RawIntensity-ye	2.22	13.62	2.6171	6.78888e-06	2.99443e-05	-	-	-	-
Unigene19917_Taxus	24	RawIntensity-ye	7.61	46.64	2.6156	8.28216e-11	6.71983e-10	-	-	-	gi|116055769|emb|CAL57854.1|/7e-15/Mitochondrial Fe-S cluster biosynthesis protein ISA2 (contains a HesB-like domain) (ISS) [Ostreococcus tauri]
Unigene18973_Taxus	13	RawIntensity-ye	4.12	25.2	2.61271	1.42898e-07	8.00121e-07	-	-	-	-
Unigene3027_Taxus	36	RawIntensity-ye	11.42	69.52	2.60587	1.10134e-13	1.29287e-12	-	-	-	-
Unigene30252_Taxus	17	RawIntensity-ye	5.39	32.73	2.60226	9.77594e-09	6.40669e-08	-	-	-	-
Unigene324_Taxus	49	RawIntensity-ye	15.54	94.15	2.59897	2.06502e-14	2.69877e-13	-	-	-	gi|195641654|gb|ACG40295.1|/4e-21/acid phosphatase/vanadium-dependent haloperoxidase related [Zea mays]
Unigene17508_Taxus	69	RawIntensity-ye	21.88	132.09	2.59384	0	0	-	-	-	gi|77024199|gb|ABA55570.1|/2e-27/chloroplast stability factor hcf136 [Pavlova lutheri]
Unigene29375_Taxus	197	RawIntensity-ye	62.47	376.87	2.59283	0	0	-	-	-	-
Unigene20303_Taxus	37	RawIntensity-ye	11.73	70.68	2.5911	8.79296e-14	1.05774e-12	-	-	-	gi|115441831|ref|NP_001045195.1|/2e-14/Os01g0916600 [Oryza sativa (japonica cultivar-group)] >gi|2624328|emb|CAA05729.1| OsGRP2 [Oryza sativa (japonica cultivar-group)] >gi|19386753|dbj|BAB86134.1| OsGRP2 [Oryza sativa Japonica Group] >gi|20805007|dbj|BAB92683.1| OsGRP2 [Oryza sativa Japonica Group] >gi|113534726|dbj|BAF07109.1| Os01g0916600 [Oryza sativa Japonica Group]
Unigene19284_Taxus	5	RawIntensity-ye	1.59	9.56	2.58798	3.07056e-05	0.000120545	-	-	-	gi|115444571|ref|NP_001046065.1|/7e-42/Os02g0176900 [Oryza sativa (japonica cultivar-group)]
Unigene9345_Taxus	11	RawIntensity-ye	3.49	20.86	2.57944	5.3206e-07	2.75776e-06	-	-	-	gi|1931652|gb|AAB65487.1|/1e-64/phosphatidylinositol-4-phosphate 5-kinase isolog; 89655-95590 [Arabidopsis thaliana]
Unigene29896_Taxus	17	RawIntensity-ye	5.39	32.15	2.57646	9.77594e-09	6.40903e-08	-	-	-	-
Unigene34006_Taxus	136	RawIntensity-ye	43.13	257.24	2.57635	1.74305e-13	1.94953e-12	-	-	-	gi|1136793|emb|CAA62760.1|/6e-35/PMSR protein [Brassica napus]
Unigene36199_Taxus	42	RawIntensity-ye	13.32	79.08	2.56972	8.83738e-14	1.05813e-12	-	-	-	gi|115481672|ref|NP_001064429.1|/1e-109/Os10g0360100 [Oryza sativa (japonica cultivar-group)] >gi|113639038|dbj|BAF26343.1| Os10g0360100 [Oryza sativa Japonica Group]
Unigene20218_Taxus	8	RawIntensity-ye	2.54	15.06	2.56782	3.63984e-06	1.67697e-05	-	-	-	gi|30680708|ref|NP_192570.2|/3e-92/nodulin MtN21 family protein [Arabidopsis thaliana] >gi|63003784|gb|AAY25421.1| At4g08300 [Arabidopsis thaliana] >gi|110738842|dbj|BAF01344.1| nodulin-like protein [Arabidopsis thaliana]
Unigene30980_Taxus	4	RawIntensity-ye	1.27	7.53	2.56782	0.000132575	0.000460493	-	-	-	-
Unigene11841_Taxus	4	RawIntensity-ye	1.27	7.53	2.56782	0.000132575	0.000460404	GO:0005737//cytoplasm	GO:0005529//sugar binding	GO:0016051//carbohydrate biosynthetic process	gi|258564608|ref|XP_002583049.1|/1e-141/glutamine-fructose-6-phosphate transaminase (isomerizing) [Uncinocarpus reesii 1704] >gi|237908556|gb|EEP82957.1| glutamine-fructose-6-phosphate transaminase (isomerizing) [Uncinocarpus reesii 1704]
Unigene34636_Taxus	41	RawIntensity-ye	13	77.06	2.56747	1.26787e-13	1.45422e-12	-	-	-	gi|7592844|dbj|BAA94422.1|/7e-44/COP1 [Oryza sativa Japonica Group]
Unigene30595_Taxus	60	RawIntensity-ye	19.03	112.69	2.56601	0	0	-	-	-	gi|224138406|ref|XP_002322806.1|/7e-18/iaa-amino acid hydrolase 4 [Populus trichocarpa] >gi|222867436|gb|EEF04567.1| iaa-amino acid hydrolase 4 [Populus trichocarpa]
Unigene26453_Taxus	13	RawIntensity-ye	4.12	24.33	2.56202	1.42899e-07	7.99877e-07	-	-	-	-
Unigene22941_Taxus	66	RawIntensity-ye	20.93	123.4	2.5597	0	0	-	-	-	gi|158828272|gb|ABW81148.1|/5e-06/TRL23 [Capsella rubella]
Unigene19127_Taxus	37	RawIntensity-ye	11.73	68.94	2.55514	8.79296e-14	1.06129e-12	-	-	-	gi|15724220|gb|AAL06503.1|AF412050_1/3e-75/At2g01180/F10A8.6 [Arabidopsis thaliana] >gi|23505931|gb|AAN28825.1| At2g01180/F10A8.6 [Arabidopsis thaliana]
Unigene27309_Taxus	7	RawIntensity-ye	2.22	13.04	2.55431	6.93344e-06	3.05146e-05	-	-	-	gi|148910353|gb|ABR18255.1|/2e-08/unknown [Picea sitchensis]
Unigene35860_Taxus	29	RawIntensity-ye	9.2	53.88	2.55004	2.99094e-12	2.84187e-11	-	-	-	gi|23306122|gb|AAN17389.1|/2e-21/Unknown protein [Oryza sativa Japonica Group]
Unigene32201_Taxus	5	RawIntensity-ye	1.59	9.27	2.54354	3.6656e-05	0.00014223	-	-	-	gi|87299435|dbj|BAE79550.1|/2e-57/geranylgeranyl pyrophosphate synthase [Chrysanthemum x morifolium]
Unigene11302_Taxus	5	RawIntensity-ye	1.59	9.27	2.54354	3.6656e-05	0.000142199	-	-	-	gi|15240340|ref|NP_198593.1|/3e-31/TCH2 (TOUCH 2); calcium ion binding [Arabidopsis thaliana] >gi|3123295|sp|P25070.2|CML24_ARATH RecName: Full=Calcium-binding protein CML24; AltName: Full=Calmodulin-like protein 24; AltName: Full=Touch-induced calmodulin-related protein 2 >gi|2583169|gb|AAB82713.1| calmodulin-related protein [Arabidopsis thaliana] >gi|10177164|dbj|BAB10353.1| calmodulin-related …
Unigene30245_Taxus	14	RawIntensity-ye	4.44	25.78	2.53762	7.3492e-08	4.29822e-07	-	-	-	gi|159488495|ref|XP_001702245.1|/1e-10/plastid lipid associated protein [Chlamydomonas reinhardtii] >gi|158271282|gb|EDO97105.1| plastid lipid associated protein [Chlamydomonas reinhardtii]
Unigene12359_Taxus	28	RawIntensity-ye	8.88	51.56	2.53762	5.63482e-12	5.20556e-11	GO:0005737//cytoplasm	GO:0004427//inorganic diphosphatase activity;GO:0000287//magnesium ion binding	GO:0006796//phosphate metabolic process	gi|226502202|ref|NP_001148294.1|/8e-92/soluble inorganic pyrophosphatase [Zea mays] >gi|195617204|gb|ACG30432.1| soluble inorganic pyrophosphatase [Zea mays]
Unigene14759_Taxus	6	RawIntensity-ye	1.9	11.01	2.53474	1.45855e-05	6.0549e-05	-	-	-	gi|116794298|gb|ABK27085.1|/3e-08/unknown [Picea sitchensis]
Unigene30330_Taxus	9	RawIntensity-ye	2.85	16.51	2.53431	1.93341e-06	9.26346e-06	-	-	-	gi|226284507|gb|EEH40073.1|/5e-06/RING-14 protein [Paracoccidioides brasiliensis Pb01]
Unigene10047_Taxus	15	RawIntensity-ye	4.76	27.52	2.53145	3.76412e-08	2.29236e-07	-	-	-	-
Unigene33638_Taxus	10	RawIntensity-ye	3.17	18.25	2.52534	1.01774e-06	5.07627e-06	-	-	-	-
Unigene16745_Taxus	24	RawIntensity-ye	7.61	43.74	2.52298	8.28216e-11	6.71377e-10	-	-	-	gi|255085312|ref|XP_002505087.1|/4e-12/chlorophyll a/b-binding protein, psi-associated, chloroplast precursor [Micromonas sp. RCC299] >gi|226520356|gb|ACO66345.1| chlorophyll a/b-binding protein, psi-associated, chloroplast precursor [Micromonas sp. RCC299]
Unigene25579_Taxus	7	RawIntensity-ye	2.22	12.75	2.52187	7.08344e-06	3.09477e-05	-	-	-	-
Unigene33042_Taxus	31	RawIntensity-ye	9.83	56.2	2.51531	8.99946e-13	9.06291e-12	-	-	-	gi|157093708|gb|ABV22580.1|/8e-20/fiddlehead [Hordeum vulgare subsp. vulgare] >gi|157093710|gb|ABV22581.1| fiddlehead [Hordeum vulgare subsp. vulgare] >gi|157093722|gb|ABV22587.1| fiddlehead [Hordeum vulgare subsp. vulgare]
Unigene30111_Taxus	39	RawIntensity-ye	12.37	70.68	2.51446	9.39248e-14	1.11717e-12	-	-	-	gi|115488120|ref|NP_001066547.1|/7e-18/Os12g0270200 [Oryza sativa (japonica cultivar-group)]
Unigene20928_Taxus	4	RawIntensity-ye	1.27	7.24	2.51116	0.000196498	0.000661957	-	-	-	gi|255718933|ref|XP_002555747.1|/9e-29/KLTH0G16390p [Lachancea thermotolerans] >gi|238937131|emb|CAR25310.1| KLTH0G16390p [Lachancea thermotolerans]
Unigene35318_Taxus	217	RawIntensity-ye	68.81	392.23	2.51101	1.75637e-13	1.96321e-12	-	-	-	gi|45593096|gb|AAS68137.1|/8e-36/homeodomain leucine zipper protein 16 [Oryza sativa Japonica Group]
Unigene26214_Taxus	143	RawIntensity-ye	45.35	258.4	2.51043	0	0	-	-	-	-
Unigene20587_Taxus	17	RawIntensity-ye	5.39	30.71	2.51035	9.77594e-09	6.41604e-08	-	-	-	gi|20197599|gb|AAM15147.1|/5e-19/Expressed protein [Arabidopsis thaliana]
Unigene2028_Taxus	13	RawIntensity-ye	4.12	23.46	2.50949	1.42902e-07	7.99647e-07	-	-	-	-
Unigene29549_Taxus	13	RawIntensity-ye	4.12	23.46	2.50949	1.42902e-07	7.99398e-07	-	-	-	-
Unigene11367_Taxus	74	RawIntensity-ye	23.47	133.54	2.50838	0	0	-	-	-	-
Unigene36144_Taxus	472	RawIntensity-ye	149.67	851.37	2.508	0	0	-	-	-	gi|290579519|gb|ADD51355.1|/3e-55/anthocyanidin synthase [Theobroma cacao]
Unigene22700_Taxus	146	RawIntensity-ye	46.3	262.45	2.50296	2.22044e-15	3.15383e-14	-	-	-	-
Unigene34506_Taxus	102	RawIntensity-ye	32.34	183.08	2.50108	0	0	-	-	-	gi|115456549|ref|NP_001051875.1|/1e-05/Os03g0844900 [Oryza sativa (japonica cultivar-group)] >gi|108712064|gb|ABF99859.1| S1 RNA binding domain containing protein, expressed [Oryza sativa (japonica cultivar-group)] >gi|113550346|dbj|BAF13789.1| Os03g0844900 [Oryza sativa Japonica Group]
Unigene25057_Taxus	5	RawIntensity-ye	1.59	8.98	2.49769	4.6544e-05	0.000176934	-	-	-	-
Unigene1540_Taxus	11	RawIntensity-ye	3.49	19.7	2.4969	5.32292e-07	2.75817e-06	-	-	-	gi|239612671|gb|EEQ89658.1|/1e-155/alpha-glucosidase [Ajellomyces dermatitidis ER-3]
Unigene8959_Taxus	6	RawIntensity-ye	1.9	10.72	2.49623	1.61427e-05	6.66906e-05	-	-	-	gi|92091607|gb|AAQ63646.3|/1e-120/glycerol-3-phosphate acyltransferase [Solanum lycopersicum]
Unigene19528_Taxus	6	RawIntensity-ye	1.9	10.72	2.49623	1.61427e-05	6.66753e-05	-	-	-	gi|212717143|gb|ACJ37413.1|/1e-05/serine/threonine protein kinase-like protein [Glycine max]
Unigene10262_Taxus	6	RawIntensity-ye	1.9	10.72	2.49623	1.61427e-05	6.666e-05	-	-	-	gi|115475535|ref|NP_001061364.1|/1e-24/Os08g0248400 [Oryza sativa (japonica cultivar-group)] >gi|113623333|dbj|BAF23278.1| Os08g0248400 [Oryza sativa Japonica Group]
Unigene3682_Taxus	6	RawIntensity-ye	1.9	10.72	2.49623	1.61427e-05	6.66447e-05	-	-	-	-
Unigene31077_Taxus	103	RawIntensity-ye	32.66	183.66	2.49144	0	0	-	-	-	-
Unigene824_Taxus	32	RawIntensity-ye	10.15	57.07	2.49125	5.36904e-13	5.58504e-12	-	-	-	gi|30685319|ref|NP_188574.2|/2e-06/late embryogenesis abundant protein-related / LEA protein-related [Arabidopsis thaliana]
Unigene5742_Taxus	28	RawIntensity-ye	8.88	49.83	2.48838	5.63482e-12	5.19755e-11	-	-	-	gi|73620927|sp|Q6IWY1.1|LPAT2_BRAOL/1e-14/RecName: Full=1-acyl-sn-glycerol-3-phosphate acyltransferase 2; AltName: Full=Lysophosphatidyl acyltransferase 2 >gi|47607472|gb|AAT36638.1| acyl-CoA:1-acylglycerol-3-phosphate acyltransferase [Brassica oleracea]
Unigene28618_Taxus	15	RawIntensity-ye	4.76	26.65	2.4851	3.76414e-08	2.29159e-07	-	-	-	-
Unigene31833_Taxus	15	RawIntensity-ye	4.76	26.65	2.4851	3.76414e-08	2.29082e-07	-	-	-	gi|116055146|emb|CAL57542.1|/1e-12/oxygen-evolving complex-related (ISS) [Ostreococcus tauri]
Unigene13302_Taxus	17	RawIntensity-ye	5.39	30.13	2.48284	9.77594e-09	6.3997e-08	-	-	-	gi|81295670|gb|ABB70128.1|/2e-08/homogentisate phytyltransferase VTE2-2 [Glycine max]
Unigene5706_Taxus	9	RawIntensity-ye	2.85	15.93	2.48271	1.94382e-06	9.31087e-06	-	-	-	gi|41056592|gb|AAR98738.1|/3e-06/signal peptide peptidase [Galega orientalis]
Unigene2606_Taxus	9	RawIntensity-ye	2.85	15.93	2.48271	1.94382e-06	9.3084e-06	-	-	-	gi|21929723|gb|AAM81973.1|/5e-15/barley stem rust resistance protein [Hordeum vulgare subsp. spontaneum]
Unigene35932_Taxus	30	RawIntensity-ye	9.51	53.01	2.47875	1.60294e-12	1.57031e-11	-	-	-	gi|116000245|emb|CAL49925.1|/2e-08/Predicted haloacid-halidohydrolase and related hydrolases (ISS) [Ostreococcus tauri]
Unigene5066_Taxus	39	RawIntensity-ye	12.37	68.94	2.4785	9.39248e-14	1.11422e-12	-	-	-	-
Unigene22212_Taxus	29	RawIntensity-ye	9.2	51.27	2.47841	2.99094e-12	2.84638e-11	-	-	-	-
Unigene26471_Taxus	22	RawIntensity-ye	6.98	38.82	2.4755	3.24314e-10	2.48356e-09	-	-	-	-
Unigene24506_Taxus	42	RawIntensity-ye	13.32	73.58	2.46572	8.83738e-14	1.05954e-12	GO:0016023//cytoplasmic membrane-bounded vesicle	-	-	gi|195607360|gb|ACG25510.1|/2e-15/beta-glucosidase [Zea mays]
Unigene35819_Taxus	87	RawIntensity-ye	27.59	152.37	2.46536	0	0	-	-	-	gi|226533300|ref|NP_001150476.1|/1e-43/LOC100284107 [Zea mays]
Unigene19510_Taxus	54	RawIntensity-ye	17.12	94.44	2.46372	1.70974e-14	2.25246e-13	-	-	-	gi|115466388|ref|NP_001056793.1|/3e-65/Os06g0146300 [Oryza sativa (japonica cultivar-group)] >gi|113594833|dbj|BAF18707.1| Os06g0146300 [Oryza sativa Japonica Group]
Unigene9380_Taxus	30	RawIntensity-ye	9.51	52.43	2.46288	1.60294e-12	1.56945e-11	-	-	-	gi|15240467|ref|NP_200323.1|/1e-09/VTC5 (VITAMIN C DEFECTIVE 5); GDP-D-glucose phosphorylase/ galactose-1-phosphate guanylyltransferase (GDP)/ quercetin 4'-O-glucosyltransferase [Arabidopsis thaliana]
Unigene20508_Taxus	6	RawIntensity-ye	1.9	10.43	2.45667	1.87162e-05	7.6532e-05	-	-	-	gi|11596|emb|CAA32267.1|/1e-105/petB [Hordeum vulgare subsp. vulgare]
Unigene7452_Taxus	6	RawIntensity-ye	1.9	10.43	2.45667	1.87162e-05	7.65146e-05	-	-	-	gi|111378706|gb|ABH09258.1|/9e-21/glutathione S-transferase [Paulinella chromatophora]
Unigene18349_Taxus	9	RawIntensity-ye	2.85	15.64	2.45621	1.95451e-06	9.35711e-06	-	-	-	gi|115455103|ref|NP_001051152.1|/2e-45/Os03g0729100 [Oryza sativa (japonica cultivar-group)] >gi|113549623|dbj|BAF13066.1| Os03g0729100 [Oryza sativa Japonica Group]
Unigene6012_Taxus	13	RawIntensity-ye	4.12	22.6	2.45561	1.42917e-07	7.99236e-07	-	-	-	-
Unigene31597_Taxus	10	RawIntensity-ye	3.17	17.38	2.45487	1.02118e-06	5.09203e-06	-	-	-	gi|115473167|ref|NP_001060182.1|/3e-07/Os07g0598400 [Oryza sativa (japonica cultivar-group)] >gi|113611718|dbj|BAF22096.1| Os07g0598400 [Oryza sativa Japonica Group]
Unigene3144_Taxus	11	RawIntensity-ye	3.49	19.12	2.45378	5.3275e-07	2.75975e-06	-	-	-	gi|62319273|dbj|BAD94501.1|/6e-12/potassium channel - protein [Arabidopsis thaliana]
Unigene16009_Taxus	4	RawIntensity-ye	1.27	6.95	2.45218	0.000302506	0.000981059	-	-	-	-
Unigene2653_Taxus	51	RawIntensity-ye	16.17	88.35	2.44991	0	0	-	-	-	-
Unigene35898_Taxus	220	RawIntensity-ye	69.76	377.45	2.43581	4.31654e-13	4.52156e-12	-	-	-	gi|115459848|ref|NP_001053524.1|/5e-66/Os04g0556300 [Oryza sativa (japonica cultivar-group)] >gi|21360380|gb|AAM47493.1| glutathione peroxidase 1 [Oryza sativa] >gi|113565095|dbj|BAF15438.1| Os04g0556300 [Oryza sativa Japonica Group]
Unigene984_Taxus	37	RawIntensity-ye	11.73	63.44	2.43519	8.79296e-14	1.05916e-12	GO:0005739//mitochondrion;GO:0009536//plastid	-	-	gi|226282247|gb|EEH37813.1|/3e-29/ATP-dependent RNA helicase DED1 [Paracoccidioides brasiliensis Pb01]
Unigene24589_Taxus	237	RawIntensity-ye	75.15	406.13	2.4341	2.30482e-13	2.5245e-12	-	-	-	-
Unigene64_Taxus	11	RawIntensity-ye	3.49	18.83	2.43173	5.3322e-07	2.76139e-06	-	-	-	-
Unigene22672_Taxus	46	RawIntensity-ye	14.59	78.21	2.42237	6.10622e-14	7.58892e-13	-	-	-	-
Unigene5265_Taxus	29	RawIntensity-ye	9.2	49.25	2.42042	2.99094e-12	2.84487e-11	-	-	-	gi|108864483|gb|ABA94163.2|/6e-14/Protein kinase domain containing protein, expressed [Oryza sativa (japonica cultivar-group)]
Unigene14996_Taxus	7	RawIntensity-ye	2.22	11.88	2.4199	8.41666e-06	3.64364e-05	-	-	-	-
Unigene35445_Taxus	7	RawIntensity-ye	2.22	11.88	2.4199	8.41666e-06	3.64277e-05	-	-	-	gi|159463120|ref|XP_001689790.1|/5e-23/CPLD43 protein required for cyt b6 assembly [Chlamydomonas reinhardtii] >gi|145308402|gb|ABP57443.1| CCB3 [Chlamydomonas reinhardtii] >gi|158283778|gb|EDP09528.1| CPLD43 protein required for cyt b6 assembly [Chlamydomonas reinhardtii]
Unigene20707_Taxus	7	RawIntensity-ye	2.22	11.88	2.4199	8.41666e-06	3.64189e-05	-	-	-	gi|224551500|gb|ACN54192.1|/3e-19/blue copper protein [Triticum aestivum]
Unigene15070_Taxus	47	RawIntensity-ye	14.9	79.66	2.41854	0	0	-	-	-	gi|115442259|ref|NP_001045409.1|/1e-121/Os01g0950900 [Oryza sativa (japonica cultivar-group)] >gi|57900474|dbj|BAD87886.1| early-responsive to dehydration protein-like [Oryza sativa Japonica Group] >gi|113534940|dbj|BAF07323.1| Os01g0950900 [Oryza sativa Japonica Group]
Unigene13544_Taxus	45	RawIntensity-ye	14.27	76.19	2.41662	0	0	-	-	-	-
Unigene19680_Taxus	12	RawIntensity-ye	3.81	20.28	2.41219	2.76836e-07	1.49115e-06	-	-	-	gi|119494807|ref|XP_001264208.1|/2e-23/GTP-binding protein Obg [Neosartorya fischeri NRRL 181] >gi|119412370|gb|EAW22311.1| GTP-binding protein Obg [Neosartorya fischeri NRRL 181]
Unigene16437_Taxus	34	RawIntensity-ye	10.78	57.36	2.41169	2.09832e-13	2.31523e-12	-	-	-	gi|3342211|gb|AAC50047.1|/3e-35/Pti4 [Solanum lycopersicum]
Unigene31764_Taxus	71	RawIntensity-ye	22.51	119.06	2.40305	0	0	-	-	-	gi|148908428|gb|ABR17327.1|/1e-08/unknown [Picea sitchensis]
Unigene6968_Taxus	70	RawIntensity-ye	22.2	117.32	2.40182	0	0	-	-	-	-
Unigene30434_Taxus	9	RawIntensity-ye	2.85	15.06	2.40169	2.00094e-06	9.56412e-06	-	-	-	gi|165292434|dbj|BAF98915.1|/6e-07/aspartic proteinase nepenthesin I [Nepenthes alata]
Unigene3190_Taxus	19	RawIntensity-ye	6.03	31.86	2.40152	2.51356e-09	1.75258e-08	-	-	-	gi|15081620|gb|AAK82465.1|/2e-30/AT5g59400/f2o15_60 [Arabidopsis thaliana] >gi|15777877|gb|AAL05899.1| AT5g59400/f2o15_60 [Arabidopsis thaliana]
Unigene35770_Taxus	5	RawIntensity-ye	1.59	8.4	2.40136	8.98712e-05	0.0003234	-	-	-	gi|224003627|ref|XP_002291485.1|/1e-120/chloroplast ftsH [Thalassiosira pseudonana CCMP1335] >gi|220973261|gb|EED91592.1| chloroplast ftsH [Thalassiosira pseudonana CCMP1335]
Unigene6813_Taxus	18	RawIntensity-ye	5.71	30.13	2.39964	4.96214e-09	3.35836e-08	-	-	-	gi|223992609|ref|XP_002285988.1|/1e-07/cytochrome c biogenesis protein precursor [Thalassiosira pseudonana CCMP1335] >gi|220977303|gb|EED95629.1| cytochrome c biogenesis protein precursor [Thalassiosira pseudonana CCMP1335]
Unigene23303_Taxus	35	RawIntensity-ye	11.1	58.52	2.39837	1.45217e-13	1.64464e-12	-	-	-	gi|2827712|emb|CAA16685.1|/6e-06/endoxyloglucan tranferase-like protein [Arabidopsis thaliana] >gi|10177331|dbj|BAB10680.1| xyloglucan endo-transglycosylase-like protein [Arabidopsis thaliana] >gi|14994271|gb|AAK73270.1| xyloglucan endo-transglycosylase-like protein [Arabidopsis thaliana]
Unigene36216_Taxus	16	RawIntensity-ye	5.07	26.65	2.39408	1.92121e-08	1.21185e-07	-	-	-	gi|115434196|ref|NP_001041856.1|/8e-75/Os01g0117900 [Oryza sativa (japonica cultivar-group)] >gi|113531387|dbj|BAF03770.1| Os01g0117900 [Oryza sativa Japonica Group]
Unigene268_Taxus	20	RawIntensity-ye	6.34	33.31	2.3934	1.27124e-09	9.13629e-09	-	-	-	gi|255678651|dbj|BAF24395.2|/5e-31/Os08g0557100 [Oryza sativa Japonica Group]
Unigene6113_Taxus	7	RawIntensity-ye	2.22	11.59	2.38425	9.52342e-06	4.09616e-05	-	-	-	gi|224284598|gb|ACN40032.1|/9e-07/unknown [Picea sitchensis]
Unigene32869_Taxus	17	RawIntensity-ye	5.39	28.1	2.38221	9.77612e-09	6.38125e-08	-	-	-	gi|240275492|gb|EER39006.1|/2e-07/misfolded glycoproteins degradation protein Yos9 [Ajellomyces capsulatus H143]
Unigene16753_Taxus	27	RawIntensity-ye	8.56	44.61	2.38168	1.09166e-11	9.7885e-11	-	-	-	-
Unigene14617_Taxus	10	RawIntensity-ye	3.17	16.51	2.38079	1.03644e-06	5.16669e-06	-	-	GO:0008152//metabolic process	gi|5689102|dbj|BAA82810.1|/6e-06/basic endochitinase [Arabidopsis thaliana]
Unigene2225_Taxus	39	RawIntensity-ye	12.37	64.31	2.3782	9.39248e-14	1.11495e-12	-	-	-	gi|15236243|ref|NP_192216.1|/1e-21/AOP1; oxidoreductase, acting on paired donors, with incorporation or reduction of molecular oxygen, 2-oxoglutarate as one donor, and incorporation of one atom each of oxygen into both donors [Arabidopsis thaliana] >gi|16118885|gb|AAL14643.1|AF417855_1 AOP1.1 [Arabidopsis thaliana]
Unigene1224_Taxus	6	RawIntensity-ye	1.9	9.85	2.37412	2.99034e-05	0.00011869	-	-	-	-
Unigene16055_Taxus	6	RawIntensity-ye	1.9	9.85	2.37412	2.99034e-05	0.000118664	-	-	-	gi|116782653|gb|ABK22594.1|/2e-17/unknown [Picea sitchensis]
Unigene23395_Taxus	21	RawIntensity-ye	6.66	34.47	2.37175	6.42232e-10	4.79768e-09	-	-	-	-
Unigene1641_Taxus	21	RawIntensity-ye	6.66	34.47	2.37175	6.42232e-10	4.79171e-09	-	-	-	gi|225683784|gb|EEH22068.1|/2e-23/retinol dehydrogenase [Paracoccidioides brasiliensis Pb03]
Unigene31783_Taxus	35	RawIntensity-ye	11.1	57.36	2.36949	1.45217e-13	1.64775e-12	-	-	-	-
Unigene54_Taxus	23	RawIntensity-ye	7.29	37.66	2.36904	1.6377e-10	1.28642e-09	-	-	-	gi|15528677|dbj|BAB64743.1|/5e-33/P0560B06.4 [Oryza sativa Japonica Group]
Unigene30038_Taxus	34	RawIntensity-ye	10.78	55.62	2.36725	2.09832e-13	2.31381e-12	GO:0016020//membrane	-	-	gi|226491488|ref|NP_001147687.1|/7e-21/transparent testa 12 protein [Zea mays] >gi|195613120|gb|ACG28390.1| transparent testa 12 protein [Zea mays]
Unigene18596_Taxus	14	RawIntensity-ye	4.44	22.88	2.36546	7.35306e-08	4.29908e-07	-	-	-	gi|255679912|dbj|BAH95159.1|/8e-17/Os11g0219000 [Oryza sativa Japonica Group]
Unigene11214_Taxus	11	RawIntensity-ye	3.49	17.96	2.36349	5.37308e-07	2.78176e-06	-	-	-	-
Unigene27688_Taxus	22	RawIntensity-ye	6.98	35.92	2.36349	3.24314e-10	2.48039e-09	-	-	-	-
Unigene35243_Taxus	13	RawIntensity-ye	4.12	21.15	2.35994	1.43132e-07	7.9994e-07	-	-	-	gi|148841042|gb|ABR14707.1|/3e-20/GTP binding tyrosine phosphorylated protein A [Cucumis sativus]
Unigene8896_Taxus	39	RawIntensity-ye	12.37	63.44	2.35855	9.39248e-14	1.12013e-12	-	-	-	gi|189194379|ref|XP_001933528.1|/5e-06/mannitol 1-phosphate dehydrogenase [Pyrenophora tritici-repentis Pt-1C-BFP] >gi|187979092|gb|EDU45718.1| mannitol 1-phosphate dehydrogenase [Pyrenophora tritici-repentis Pt-1C-BFP]
Unigene6518_Taxus	15	RawIntensity-ye	4.76	24.33	2.3537	3.76516e-08	2.29066e-07	-	-	-	gi|116056665|emb|CAL52954.1|/4e-07/Arp2/3 complex-interacting protein VIP1/Asp1, involved in regulation of actin cytoskeleton (ISS) [Ostreococcus tauri]
Unigene7774_Taxus	15	RawIntensity-ye	4.76	24.33	2.3537	3.76516e-08	2.28989e-07	-	-	-	gi|15218674|ref|NP_171800.1|/2e-50/phototropic-responsive NPH3 family protein [Arabidopsis thaliana] >gi|4587577|gb|AAD25808.1|AC006550_16 F10O3.17 [Arabidopsis thaliana]
Unigene13059_Taxus	5	RawIntensity-ye	1.59	8.11	2.35068	0.000134096	0.000462207	-	-	-	gi|30687109|ref|NP_850280.1|/8e-22/RSZ33; nucleic acid binding / nucleotide binding / zinc ion binding [Arabidopsis thaliana]
Unigene29304_Taxus	7	RawIntensity-ye	2.22	11.3	2.34769	1.13324e-05	4.83493e-05	-	-	-	gi|255673009|dbj|BAF04349.2|/8e-32/Os01g0221900 [Oryza sativa Japonica Group]
Unigene28806_Taxus	7	RawIntensity-ye	2.22	11.3	2.34769	1.13324e-05	4.83379e-05	-	-	-	gi|15227199|ref|NP_179827.1|/3e-07/pentatricopeptide (PPR) repeat-containing protein [Arabidopsis thaliana] >gi|75206347|sp|Q9SJZ3.1|PP169_ARATH RecName: Full=Pentatricopeptide repeat-containing protein At2g22410, mitochondrial; Flags: Precursor >gi|18086349|gb|AAL57637.1| At2g22410/F14M13.19 [Arabidopsis thaliana]
Unigene6832_Taxus	7	RawIntensity-ye	2.22	11.3	2.34769	1.13324e-05	4.83264e-05	-	-	-	gi|162461529|ref|NP_001105793.1|/1e-14/alkaline alpha galactosidase 1 [Zea mays] >gi|68270843|gb|AAQ07251.2|AF497510_1 alkaline alpha galactosidase 1 [Zea mays]
Unigene29747_Taxus	7	RawIntensity-ye	2.22	11.3	2.34769	1.13324e-05	4.8315e-05	GO:0009536//plastid	GO:0004252//serine-type endopeptidase activity	GO:0006508//proteolysis	gi|145347023|ref|XP_001417979.1|/7e-34/chloroplast Clp protease, subunit of ClpP peptidase complex [Ostreococcus lucimarinus CCE9901] >gi|144578207|gb|ABO96272.1| chloroplast Clp protease, subunit of ClpP peptidase complex [Ostreococcus lucimarinus CCE9901]
Unigene10335_Taxus	482	RawIntensity-ye	152.85	777.21	2.34619	0	0	-	-	-	-
Unigene29611_Taxus	20	RawIntensity-ye	6.34	32.15	2.34226	1.27125e-09	9.13267e-09	-	-	-	-
Unigene35875_Taxus	6	RawIntensity-ye	1.9	9.56	2.33101	4.12558e-05	0.000157697	-	-	-	gi|11994703|dbj|BAB02941.1|/3e-35/somatic embryogenesis receptor kinase-like protein [Arabidopsis thaliana]
Unigene5240_Taxus	8	RawIntensity-ye	2.54	12.75	2.3276	4.83652e-06	2.18688e-05	-	-	-	gi|115440115|ref|NP_001044337.1|/3e-07/Os01g0763800 [Oryza sativa (japonica cultivar-group)]
Unigene31094_Taxus	284	RawIntensity-ye	90.06	451.61	2.32612	3.15304e-14	4.02141e-13	-	-	-	gi|219129451|ref|XP_002184902.1|/1e-07/xylose isomerase [Phaeodactylum tricornutum CCAP 1055/1] >gi|217403687|gb|EEC43638.1| xylose isomerase [Phaeodactylum tricornutum CCAP 1055/1]
Unigene36105_Taxus	33	RawIntensity-ye	10.46	52.14	2.31751	3.33956e-13	3.57093e-12	-	-	-	gi|115488908|ref|NP_001066941.1|/1e-93/Os12g0538500 [Oryza sativa (japonica cultivar-group)] >gi|108862778|gb|ABA99335.2| CHY zinc finger family protein, expressed [Oryza sativa (japonica cultivar-group)] >gi|113649448|dbj|BAF29960.1| Os12g0538500 [Oryza sativa Japonica Group]
Unigene20550_Taxus	42	RawIntensity-ye	13.32	66.34	2.31628	8.83738e-14	1.06167e-12	GO:0009536//plastid	-	-	gi|115477166|ref|NP_001062179.1|/3e-13/Os08g0504500 [Oryza sativa (japonica cultivar-group)] >gi|113624148|dbj|BAF24093.1| Os08g0504500 [Oryza sativa Japonica Group]
Unigene33553_Taxus	9	RawIntensity-ye	2.85	14.19	2.31584	2.25022e-06	1.06847e-05	GO:0045261//proton-transporting ATP synthase complex, catalytic core F(1);GO:0009941//chloroplast envelope;GO:0009535//chloroplast thylakoid membrane	GO:0046933//hydrogen ion transporting ATP synthase activity, rotational mechanism;GO:0046961//proton-transporting ATPase activity, rotational mechanism	GO:0015986//ATP synthesis coupled proton transport	gi|219119491|ref|XP_002180505.1|/1e-46/precursor of ATPase ATPase gamma subunit [Phaeodactylum tricornutum CCAP 1055/1] >gi|217407978|gb|EEC47913.1| precursor of ATPase ATPase gamma subunit [Phaeodactylum tricornutum CCAP 1055/1]
Unigene21139_Taxus	89	RawIntensity-ye	28.22	140.5	2.31578	0	0	-	-	-	gi|261188864|ref|XP_002620845.1|/1e-73/AMP-binding enzyme [Ajellomyces dermatitidis SLH14081] >gi|239591987|gb|EEQ74568.1| AMP-binding enzyme [Ajellomyces dermatitidis SLH14081] >gi|239615324|gb|EEQ92311.1| AMP-binding enzyme [Ajellomyces dermatitidis ER-3]
Unigene35722_Taxus	38	RawIntensity-ye	12.05	59.96	2.31497	7.4607e-14	9.1522e-13	-	-	-	gi|194239628|dbj|BAG55223.1|/1e-21/chlorophyllase [Sesbania rostrata]
Unigene17892_Taxus	7	RawIntensity-ye	2.22	11.01	2.31018	1.42783e-05	5.97286e-05	-	-	-	gi|158828372|gb|ABW81204.1|/7e-43/alcohol acyl transferase [Citrus sinensis]
Unigene35661_Taxus	91	RawIntensity-ye	28.86	143.1	2.30988	0	0	-	-	-	gi|269101020|ref|YP_003289168.1|/6e-65/50S ribosomal protein L1 [Ectocarpus siliculosus] >gi|266631528|emb|CAV31199.1| Chloroplast 50S ribosomal protein L1 [Ectocarpus siliculosus] >gi|270118658|emb|CAT18712.1| Chloroplast 50S ribosomal protein L1 [Ectocarpus siliculosus]
Unigene9510_Taxus	21	RawIntensity-ye	6.66	33.02	2.30975	6.42236e-10	4.78381e-09	-	-	-	gi|115466936|ref|NP_001057067.1|/2e-08/Os06g0199400 [Oryza sativa (japonica cultivar-group)]
Unigene20357_Taxus	27	RawIntensity-ye	8.56	42.29	2.30463	1.09166e-11	9.79826e-11	GO:0009536//plastid	-	GO:0022900//electron transport chain	gi|11467348|ref|NP_043205.1|/3e-14/ferredoxin [Cyanophora paradoxa] >gi|119921|sp|P17007.3|FER1_CYAPA RecName: Full=Ferredoxin-1; AltName: Full=Ferredoxin I >gi|336631|gb|AAA31699.1| ferredoxin (petF) [Cyanophora paradoxa] >gi|1016149|gb|AAA81236.1| soluble [2Fe-2S] ferredoxin [Cyanophora paradoxa]
Unigene10516_Taxus	25	RawIntensity-ye	7.93	39.11	2.30214	4.1946e-11	3.51098e-10	-	-	-	gi|12958607|gb|AAK09372.1|AF321557_1/1e-144/sucrose-6F-phosphate phosphohydrolase SPP2 [Triticum aestivum]
Unigene35004_Taxus	56	RawIntensity-ye	17.76	87.48	2.30032	0	0	-	-	-	gi|102139900|gb|ABF70049.1|/8e-10/U-box domain-containing protein [Musa acuminata]
Unigene7410_Taxus	5	RawIntensity-ye	1.59	7.82	2.29814	0.000206274	0.000692428	-	-	-	gi|108711872|gb|ABF99667.1|/4e-76/DEAD/DEAH box helicase family protein, expressed [Oryza sativa (japonica cultivar-group)]
Unigene7283_Taxus	51	RawIntensity-ye	16.17	79.37	2.29527	0	0	-	-	-	gi|213053816|gb|ACJ39213.1|/3e-62/inducer of CBF expression 3 [Glycine max]
Unigene18515_Taxus	8	RawIntensity-ye	2.54	12.46	2.2944	5.6073e-06	2.51518e-05	-	-	-	gi|15228789|ref|NP_191158.1|/6e-42/ESK1 (ESKIMO 1) [Arabidopsis thaliana]
Unigene19794_Taxus	11	RawIntensity-ye	3.49	17.09	2.29185	5.5494e-07	2.86892e-06	-	-	-	gi|115451409|ref|NP_001049305.1|/2e-33/Os03g0203100 [Oryza sativa (japonica cultivar-group)] >gi|108706728|gb|ABF94523.1| expressed protein [Oryza sativa (japonica cultivar-group)] >gi|113547776|dbj|BAF11219.1| Os03g0203100 [Oryza sativa Japonica Group]
Unigene12505_Taxus	25	RawIntensity-ye	7.93	38.82	2.29141	4.1946e-11	3.51261e-10	-	-	-	gi|229915490|gb|ACQ90834.1|/1e-148/magnesium chelatase subunit of protochlorophyllide reductase [Pedinomonas minor]
Unigene18058_Taxus	32	RawIntensity-ye	10.15	49.54	2.28711	5.36904e-13	5.58182e-12	-	-	-	gi|6573770|gb|AAF17690.1|AC009243_17/1e-133/F28K19.28 [Arabidopsis thaliana]
Unigene14968_Taxus	6	RawIntensity-ye	1.9	9.27	2.28657	5.97204e-05	0.000223715	-	-	-	gi|195638068|gb|ACG38502.1|/1e-06/VAP27 [Zea mays]
Unigene1122_Taxus	9	RawIntensity-ye	2.85	13.9	2.28605	2.4532e-06	1.15904e-05	-	-	-	-
Unigene32512_Taxus	62	RawIntensity-ye	19.66	95.88	2.28597	0	0	-	-	-	gi|11465765|ref|NP_053909.1|/8e-10/ribosomal protein L18 [Porphyra purpurea] >gi|1710414|sp|P51299.1|RK18_PORPU RecName: Full=50S ribosomal protein L18, chloroplastic >gi|1276765|gb|AAC08185.1| 50S ribosomal protein L18 [Porphyra purpurea]
Unigene10509_Taxus	21	RawIntensity-ye	6.66	32.44	2.28418	6.42244e-10	4.78189e-09	-	-	-	gi|21698781|emb|CAD10807.1|/9e-86/nodulation receptor kinase [Medicago sativa]
Unigene4418_Taxus	36	RawIntensity-ye	11.42	55.33	2.2765	1.10134e-13	1.29035e-12	GO:0044464//cell part	-	-	gi|121735549|sp|Q0CEN9.1|TPC1_ASPTN/2e-46/RecName: Full=Mitochondrial thiamine pyrophosphate carrier 1
Unigene33522_Taxus	10	RawIntensity-ye	3.17	15.35	2.27568	1.15634e-06	5.72475e-06	-	-	-	gi|168054543|ref|XP_001779690.1|/5e-25/predicted protein [Physcomitrella patens subsp. patens] >gi|162668888|gb|EDQ55486.1| predicted protein [Physcomitrella patens subsp. patens]
Unigene19390_Taxus	14	RawIntensity-ye	4.44	21.44	2.27167	7.39346e-08	4.3213e-07	-	-	-	gi|227206112|dbj|BAH57111.1|/1e-102/AT5G39590 [Arabidopsis thaliana]
Unigene35139_Taxus	97	RawIntensity-ye	30.76	148.32	2.26959	5.75096e-14	7.1921e-13	-	-	-	gi|226316443|gb|ACO44685.1|/7e-98/fructose-bisphosphate aldolase [Hordeum vulgare]
Unigene17566_Taxus	98	RawIntensity-ye	31.08	149.77	2.26869	1.11022e-15	1.60737e-14	-	-	-	gi|73918053|gb|AAZ93636.1|/2e-24/pathogen-induced defense-responsive protein 8 [Oryza sativa Indica Group]
Unigene15230_Taxus	11	RawIntensity-ye	3.49	16.8	2.26716	5.69222e-07	2.94106e-06	-	-	-	gi|195626356|gb|ACG35008.1|/1e-06/phosphomevalonate kinase [Zea mays]
Unigene31349_Taxus	48	RawIntensity-ye	15.22	73	2.26193	8.52652e-14	1.03329e-12	-	-	-	-
Unigene16141_Taxus	24	RawIntensity-ye	7.61	36.5	2.26193	8.28218e-11	6.70473e-10	-	-	-	gi|15220284|ref|NP_172576.1|/9e-61/hydrolase, alpha/beta fold family protein [Arabidopsis thaliana] >gi|1931639|gb|AAB65474.1| lysophospholipase isolog; 25331-24357 [Arabidopsis thaliana] >gi|31711728|gb|AAP68220.1| At1g11090 [Arabidopsis thaliana]
Unigene32590_Taxus	197	RawIntensity-ye	62.47	298.95	2.25867	0	0	-	-	-	gi|15239081|ref|NP_196715.1|/3e-10/FAD-binding domain-containing protein [Arabidopsis thaliana]
Unigene34490_Taxus	17	RawIntensity-ye	5.39	25.78	2.2579	9.78466e-09	6.38451e-08	-	-	-	gi|196122124|gb|ACG69537.1|/6e-67/caleosin CLO1-5 [Brassica napus]
Unigene15404_Taxus	71	RawIntensity-ye	22.51	107.47	2.2553	0	0	-	-	-	gi|159482516|ref|XP_001699315.1|/9e-13/permease-like component of an ABC transporter [Chlamydomonas reinhardtii] >gi|158272951|gb|EDO98745.1| permease-like component of an ABC transporter [Chlamydomonas reinhardtii]
Unigene7685_Taxus	22	RawIntensity-ye	6.98	33.31	2.25466	3.24322e-10	2.4794e-09	-	-	-	gi|226498852|ref|NP_001150448.1|/6e-06/plastid-lipid-associated protein 2 [Zea mays] >gi|195639346|gb|ACG39141.1| plastid-lipid-associated protein 2 [Zea mays]
Unigene35424_Taxus	81	RawIntensity-ye	25.69	122.54	2.25397	4.04122e-14	5.11074e-13	-	-	-	gi|79546640|ref|NP_201135.2|/1e-07/structural constituent of ribosome [Arabidopsis thaliana] >gi|63147388|gb|AAY34167.1| At5g63300 [Arabidopsis thaliana]
Unigene25697_Taxus	36	RawIntensity-ye	11.42	54.46	2.25363	1.10134e-13	1.29119e-12	-	-	-	-
Unigene15487_Taxus	32	RawIntensity-ye	10.15	48.38	2.25293	5.36904e-13	5.58827e-12	-	-	-	gi|63108922|gb|AAY33633.1|/1e-103/RVDE1 [Oryza meridionalis] >gi|63108946|gb|AAY33645.1| RVDE1 [Oryza sativa Indica Group] >gi|63108950|gb|AAY33647.1| RVDE1 [Oryza sativa Indica Group] >gi|63108958|gb|AAY33651.1| RVDE1 [Oryza sativa Indica Group] >gi|86991274|gb|ABD16098.1| RVDE1 [Oryza meridionalis] >gi|86991286|gb|ABD16104.1| RVDE1 [Oryza nivara] >gi|86991288|gb|ABD16105.1| RVDE1 [Oryza nivara]…
Unigene21336_Taxus	28	RawIntensity-ye	8.88	42.29	2.25168	5.63482e-12	5.20288e-11	-	-	-	gi|195651705|gb|ACG45320.1|/6e-08/threonine endopeptidase [Zea mays]
Unigene32660_Taxus	10	RawIntensity-ye	3.17	15.06	2.24817	1.24308e-06	6.13898e-06	-	-	-	gi|46518433|gb|AAS99698.1|/6e-08/At3g24040 [Arabidopsis thaliana]
Unigene15258_Taxus	15	RawIntensity-ye	4.76	22.6	2.24729	3.78342e-08	2.30022e-07	-	-	-	-
Unigene14770_Taxus	26	RawIntensity-ye	8.24	39.11	2.24682	2.1358e-11	1.84433e-10	-	-	-	gi|115455101|ref|NP_001051151.1|/2e-10/Os03g0729000 [Oryza sativa (japonica cultivar-group)] >gi|108710881|gb|ABF98676.1| expressed protein [Oryza sativa (japonica cultivar-group)] >gi|113549622|dbj|BAF13065.1| Os03g0729000 [Oryza sativa Japonica Group]
Unigene33786_Taxus	31	RawIntensity-ye	9.83	46.64	2.2463	8.99946e-13	9.04773e-12	-	-	-	gi|1350821|sp|P49314.1|ROC2_NICPL/1e-14/RecName: Full=31 kDa ribonucleoprotein, chloroplastic; AltName: Full=CP-RBP31; Flags: Precursor >gi|19710|emb|CAA46233.1| RNA binding protein 31 [Nicotiana plumbaginifolia]
Unigene36081_Taxus	21	RawIntensity-ye	6.66	31.58	2.24542	6.4228e-10	4.78018e-09	-	-	-	gi|45184870|ref|NP_982588.1|/6e-37/AAR047Cp [Ashbya gossypii ATCC 10895] >gi|44980479|gb|AAS50412.1| AAR047Cp [Ashbya gossypii ATCC 10895]
Unigene31794_Taxus	49	RawIntensity-ye	15.54	73.58	2.24333	2.06502e-14	2.69681e-13	-	-	-	-
Unigene27623_Taxus	6	RawIntensity-ye	1.9	8.98	2.24072	8.9617e-05	0.000322679	-	-	-	gi|37953330|gb|AAP69755.1|/7e-44/NAD-dependent sorbitol dehydrogenase 8 [Malus x domestica]
Unigene1451_Taxus	12	RawIntensity-ye	3.81	17.96	2.23692	2.92596e-07	1.57275e-06	-	-	-	gi|116786226|gb|ABK24030.1|/8e-10/unknown [Picea sitchensis]
Unigene15729_Taxus	148	RawIntensity-ye	46.93	221.03	2.23566	0	0	-	-	-	-
Unigene7202_Taxus	7	RawIntensity-ye	2.22	10.43	2.23211	2.67802e-05	0.000106883	-	-	-	gi|115465587|ref|NP_001056393.1|/2e-63/Os05g0574800 [Oryza sativa (japonica cultivar-group)]
Unigene34235_Taxus	29	RawIntensity-ye	9.2	43.16	2.22999	2.99094e-12	2.83737e-11	-	-	-	gi|115461627|ref|NP_001054413.1|/6e-18/Os05g0105800 [Oryza sativa (japonica cultivar-group)]
Unigene30373_Taxus	87	RawIntensity-ye	27.59	129.2	2.22739	0	0	-	-	-	gi|194477106|ref|YP_002049285.1|/1e-35/FeS assembly ATPase SufC [Paulinella chromatophora] >gi|171192113|gb|ACB43075.1| FeS assembly ATPase SufC [Paulinella chromatophora]
Unigene25611_Taxus	9	RawIntensity-ye	2.85	13.33	2.22564	3.31002e-06	1.54921e-05	-	-	-	gi|38605337|sp|Q8L7H3.1|XTH29_ARATH/2e-17/RecName: Full=Probable xyloglucan endotransglucosylase/hydrolase protein 29; Short=At-XTH29; Short=XTH-29; Flags: Precursor
Unigene8593_Taxus	23	RawIntensity-ye	7.29	33.89	2.21687	1.63779e-10	1.28537e-09	-	-	-	gi|44917535|gb|AAS49092.1|/5e-17/At2g01755 [Arabidopsis thaliana]
Unigene21527_Taxus	11	RawIntensity-ye	3.49	16.22	2.21647	6.29308e-07	3.24128e-06	-	-	-	gi|115456932|ref|NP_001052066.1|/5e-06/Os04g0119500 [Oryza sativa (japonica cultivar-group)] >gi|38344869|emb|CAE01295.2| OSJNBa0020P07.12 [Oryza sativa (japonica cultivar-group)] >gi|113563637|dbj|BAF13980.1| Os04g0119500 [Oryza sativa Japonica Group]
Unigene19784_Taxus	12	RawIntensity-ye	3.81	17.67	2.21344	3.02466e-07	1.62483e-06	-	-	-	gi|259146707|emb|CAY79964.1|/7e-29/EC1118_1G1_5358p [Saccharomyces cerevisiae EC1118]
Unigene12487_Taxus	16	RawIntensity-ye	5.07	23.46	2.21015	1.93465e-08	1.21947e-07	GO:0009536//plastid;GO:0005739//mitochondrion	-	-	gi|226507386|ref|NP_001151709.1|/2e-06/structural constituent of ribosome [Zea mays] >gi|195649205|gb|ACG44070.1| structural constituent of ribosome [Zea mays]
Unigene28694_Taxus	44	RawIntensity-ye	13.95	64.31	2.20478	6.41708e-14	7.95329e-13	-	-	-	-
Unigene33028_Taxus	44	RawIntensity-ye	13.95	64.31	2.20478	6.41708e-14	7.94782e-13	-	-	-	gi|75328831|sp|Q8GU92.1|PDR2_ORYSJ/5e-27/RecName: Full=Probable pleiotropic drug resistance protein 2 >gi|27368817|emb|CAD59566.1| PDR-like ABC transporter [Oryza sativa (japonica cultivar-group)] >gi|28144345|tpg|DAA00885.1| TPA_exp: PDR2 ABC transporter [Oryza sativa (japonica cultivar-group)]
Unigene34735_Taxus	26	RawIntensity-ye	8.24	37.95	2.20338	2.1358e-11	1.8408e-10	-	-	-	gi|226529308|ref|NP_001149932.1|/3e-06/vegetative cell wall protein gp1 [Zea mays] >gi|195635573|gb|ACG37255.1| vegetative cell wall protein gp1 precursor [Zea mays]
Unigene35834_Taxus	51	RawIntensity-ye	16.17	74.45	2.20295	0	0	-	-	-	gi|116058871|emb|CAL54578.1|/3e-12/ribosome-binding factor A protein-like (ISS) [Ostreococcus tauri]
Unigene20351_Taxus	6	RawIntensity-ye	1.9	8.69	2.19336	0.000137792	0.000473768	-	-	-	gi|115483386|ref|NP_001065363.1|/9e-64/Os10g0558400 [Oryza sativa (japonica cultivar-group)]
Unigene20348_Taxus	6	RawIntensity-ye	1.9	8.69	2.19336	0.000137792	0.000473677	-	-	-	gi|195612420|gb|ACG28040.1|/4e-19/deoxyribodipyrimidine photolyase family protein [Zea mays]
Unigene16290_Taxus	6	RawIntensity-ye	1.9	8.69	2.19336	0.000137792	0.000473587	GO:0009523//photosystem II;GO:0009579//thylakoid;GO:0009536//plastid	GO:0046872//metal ion binding;GO:0043169//cation binding	GO:0015979//photosynthesis	gi|15240013|ref|NP_201458.1|/9e-10/PSBO1 (PS II OXYGEN-EVOLVING COMPLEX 1); oxygen evolving/ poly(U) binding [Arabidopsis thaliana] >gi|19883896|sp|P23321.2|PSBO1_ARATH RecName: Full=Oxygen-evolving enhancer protein 1-1, chloroplastic; Short=OEE1; AltName: Full=33 kDa subunit of oxygen evolving system of photosystem II; AltName: Full=OEC 33 kDa subunit; AltName: Full=33 kDa thylakoid membrane pro…
Unigene20947_Taxus	10	RawIntensity-ye	3.17	14.48	2.19151	1.60681e-06	7.80042e-06	-	-	-	gi|115460436|ref|NP_001053818.1|/3e-62/Os04g0608900 [Oryza sativa (japonica cultivar-group)] >gi|27085280|gb|AAN84503.1| serine/threonine protein kinase [Oryza sativa Japonica Group] >gi|38567896|emb|CAE03651.2| OSJNBa0060N03.16 [Oryza sativa (japonica cultivar-group)] >gi|90265072|emb|CAH67745.1| H0702G05.4 [Oryza sativa (indica cultivar-group)] >gi|113565389|dbj|BAF15732.1| Os04g0608900 [Oryza …
Unigene26311_Taxus	7	RawIntensity-ye	2.22	10.14	2.19143	3.92066e-05	0.00015044	-	-	-	-
Unigene34497_Taxus	14	RawIntensity-ye	4.44	20.28	2.19143	7.64876e-08	4.45893e-07	-	-	-	gi|224004232|ref|XP_002295767.1|/3e-18/rubredoxin, rubredoxin-type Fe4 protein [Thalassiosira pseudonana CCMP1335] >gi|209585799|gb|ACI64484.1| rubredoxin, rubredoxin-type Fe4 protein [Thalassiosira pseudonana CCMP1335]
Unigene30775_Taxus	7	RawIntensity-ye	2.22	10.14	2.19143	3.92066e-05	0.000150408	-	-	-	gi|5454199|gb|AAD43614.1|AC005698_13/7e-28/T3P18.13 [Arabidopsis thaliana]
Unigene19771_Taxus	7	RawIntensity-ye	2.22	10.14	2.19143	3.92066e-05	0.000150376	-	-	-	gi|194239628|dbj|BAG55223.1|/2e-11/chlorophyllase [Sesbania rostrata]
Unigene32282_Taxus	14	RawIntensity-ye	4.44	20.28	2.19143	7.64876e-08	4.45748e-07	-	-	-	-
Unigene22109_Taxus	22	RawIntensity-ye	6.98	31.86	2.19045	3.244e-10	2.47894e-09	-	-	-	gi|42570080|ref|NP_683294.2|/3e-09/phosphoglycerate/bisphosphoglycerate mutase family protein [Arabidopsis thaliana]
Unigene34034_Taxus	11	RawIntensity-ye	3.49	15.93	2.19045	6.88736e-07	3.52617e-06	-	-	-	gi|79515670|ref|NP_197295.2|/2e-15/binding / protein binding [Arabidopsis thaliana]
Unigene23301_Taxus	40	RawIntensity-ye	12.68	57.36	2.17749	8.37108e-14	1.01719e-12	-	-	-	-
Unigene18119_Taxus	19	RawIntensity-ye	6.03	27.23	2.17497	2.52042e-09	1.75396e-08	-	-	-	gi|144225745|emb|CAM84269.1|/7e-71/abscisic insensitive 1B [Populus tremula] >gi|144225755|emb|CAM84274.1| abscisic insensitive 1B [Populus tremula]
Unigene23755_Taxus	36	RawIntensity-ye	11.42	51.27	2.16655	1.10134e-13	1.28783e-12	-	-	-	-
Unigene22728_Taxus	11	RawIntensity-ye	3.49	15.64	2.16394	7.83782e-07	3.96652e-06	-	-	-	-
Unigene19581_Taxus	42	RawIntensity-ye	13.32	59.67	2.16341	8.83738e-14	1.05743e-12	-	-	-	gi|159482850|ref|XP_001699478.1|/5e-08/pyridine nucleotide binding protein [Chlamydomonas reinhardtii] >gi|158272745|gb|EDO98541.1| pyridine nucleotide binding protein [Chlamydomonas reinhardtii]
Unigene335_Taxus	9	RawIntensity-ye	2.85	12.75	2.16146	5.51804e-06	2.47699e-05	-	-	-	-
Unigene27715_Taxus	47	RawIntensity-ye	14.9	66.63	2.16086	0	0	-	-	-	-
Unigene12727_Taxus	26	RawIntensity-ye	8.24	36.79	2.1586	2.13596e-11	1.84005e-10	GO:0009536//plastid	-	-	gi|108710955|gb|ABF98750.1|/1e-42/expressed protein [Oryza sativa (japonica cultivar-group)]
Unigene25533_Taxus	18	RawIntensity-ye	5.71	25.49	2.15837	5.00266e-09	3.38451e-08	-	-	-	gi|116310992|emb|CAH67927.1|/2e-15/OSIGBa0138E08-OSIGBa0161L23.8 [Oryza sativa (indica cultivar-group)]
Unigene16958_Taxus	17	RawIntensity-ye	5.39	24.04	2.15708	9.92594e-09	6.47435e-08	-	-	-	-
Unigene35500_Taxus	74	RawIntensity-ye	23.47	104.57	2.15558	0	0	-	-	-	gi|6324045|ref|NP_014115.1|/2e-10/Mitochondrial ribosomal protein of the large subunit; appears as two protein spots (YmL10 and YmL18) on two-dimensional SDS gels [Saccharomyces cerevisiae] >gi|1710599|sp|P36520.2|RM10_YEAST RecName: Full=54S ribosomal protein L10, mitochondrial; AltName: Full=YmL10/YmL18; Flags: Precursor >gi|151944265|gb|EDN62543.1| YmL10 [Saccharomyces cerevisiae YJM789] >gi|1…
Unigene31411_Taxus	57	RawIntensity-ye	18.08	80.53	2.15513	2.73114e-14	3.5258e-13	-	-	-	gi|116788367|gb|ABK24854.1|/3e-08/unknown [Picea sitchensis]
Unigene32893_Taxus	233	RawIntensity-ye	73.89	328.79	2.15372	0	0	-	-	-	gi|115444879|ref|NP_001046219.1|/2e-22/Os02g0200000 [Oryza sativa (japonica cultivar-group)] >gi|113535750|dbj|BAF08133.1| Os02g0200000 [Oryza sativa Japonica Group]
Unigene34837_Taxus	130	RawIntensity-ye	41.22	183.37	2.15334	0	0	-	-	-	gi|116792237|gb|ABK26285.1|/2e-79/unknown [Picea sitchensis]
Unigene35071_Taxus	74	RawIntensity-ye	23.47	104.29	2.15171	0	0	-	-	-	gi|226504516|ref|NP_001147472.1|/2e-32/potassium transporter 10 [Zea mays] >gi|195611632|gb|ACG27646.1| potassium transporter 10 [Zea mays]
Unigene17687_Taxus	50	RawIntensity-ye	15.86	70.39	2.14998	9.32588e-15	1.25432e-13	-	-	-	gi|6630456|gb|AAF19544.1|AC007190_12/7e-29/F23N19.15 [Arabidopsis thaliana]
Unigene13638_Taxus	7	RawIntensity-ye	2.22	9.85	2.14956	5.91136e-05	0.000221627	-	-	-	gi|255680101|dbj|BAH95272.1|/6e-11/Os11g0487100 [Oryza sativa Japonica Group]
Unigene34048_Taxus	7	RawIntensity-ye	2.22	9.85	2.14956	5.91136e-05	0.000221581	-	-	-	-
Unigene17232_Taxus	7	RawIntensity-ye	2.22	9.85	2.14956	5.91136e-05	0.000221534	-	-	-	gi|171921104|gb|ACB59202.1|/1e-29/GCN5-related protein [Brassica oleracea]
Unigene13169_Taxus	42	RawIntensity-ye	13.32	59.09	2.14932	8.83738e-14	1.05884e-12	-	-	-	gi|18416726|ref|NP_567743.1|/8e-13/elongation factor P (EF-P) family protein [Arabidopsis thaliana]
Unigene2044_Taxus	6	RawIntensity-ye	1.9	8.4	2.14439	0.000215026	0.000721269	-	-	-	-
Unigene4567_Taxus	6	RawIntensity-ye	1.9	8.4	2.14439	0.000215026	0.000721135	-	-	-	-
Unigene9399_Taxus	19	RawIntensity-ye	6.03	26.65	2.14391	2.53106e-09	1.76069e-08	-	-	-	gi|226707513|sp|A1CX75.1|MOCOS_NEOFI/6e-10/RecName: Full=Molybdenum cofactor sulfurase; Short=MoCo sulfurase; Short=MOS
Unigene15202_Taxus	18	RawIntensity-ye	5.71	25.2	2.14186	5.02682e-09	3.39957e-08	-	-	-	gi|259489767|tpe|CBF90310.1|/9e-13/TPA: histidyl-tRNA synthetase, mitochondrial precursor (AFU_orthologue; AFUA_4G12920) [Aspergillus nidulans FGSC A4]
Unigene24101_Taxus	159	RawIntensity-ye	50.42	222.47	2.14154	5.10702e-14	6.40906e-13	-	-	-	-
Unigene34302_Taxus	97	RawIntensity-ye	30.76	135.57	2.13991	5.75096e-14	7.17713e-13	-	-	-	gi|14517430|gb|AAK62605.1|/6e-41/AT3g17930/MEB5_15 [Arabidopsis thaliana] >gi|20147323|gb|AAM10375.1| AT3g17930/MEB5_15 [Arabidopsis thaliana]
Unigene13186_Taxus	17	RawIntensity-ye	5.39	23.75	2.13957	1.00154e-08	6.52799e-08	-	-	-	gi|82097|pir||S00629/5e-08/pectinesterase (EC 3.1.1.11) precursor (clone PE1) - tomato
Unigene32363_Taxus	60	RawIntensity-ye	19.03	83.72	2.1373	0	0	-	-	-	gi|37654366|gb|AAQ95730.1|/2e-23/phospholipase C [Vigna radiata]
Unigene13506_Taxus	11	RawIntensity-ye	3.49	15.35	2.13694	9.35342e-07	4.70837e-06	-	-	-	gi|195658957|gb|ACG48946.1|/7e-06/Zn-finger, RanBP-type, containing protein [Zea mays]
Unigene18551_Taxus	21	RawIntensity-ye	6.66	29.26	2.13534	6.44282e-10	4.7931e-09	-	-	-	-
Unigene4785_Taxus	25	RawIntensity-ye	7.93	34.76	2.13204	4.19638e-11	3.51083e-10	-	-	-	gi|116310121|emb|CAH67138.1|/5e-10/OSIGBa0130P02.2 [Oryza sativa (indica cultivar-group)]
Unigene6117_Taxus	47	RawIntensity-ye	14.9	65.18	2.12912	0	0	-	-	-	gi|55375993|gb|AAV50008.1|/6e-30/protein disulfide isomerase [Malus x domestica]
Unigene2120_Taxus	52	RawIntensity-ye	16.49	72.13	2.12901	2.4869e-14	3.22669e-13	-	-	-	gi|194476908|ref|YP_002049087.1|/1e-28/trigger factor [Paulinella chromatophora] >gi|171191915|gb|ACB42877.1| trigger factor [Paulinella chromatophora]
Unigene30233_Taxus	200	RawIntensity-ye	63.42	277.22	2.12802	0	0	-	-	-	gi|226508934|ref|NP_001152708.1|/1e-07/LOC100286349 [Zea mays] >gi|195659221|gb|ACG49078.1| calmodulin-related protein 2, touch-induced [Zea mays]
Unigene29724_Taxus	51	RawIntensity-ye	16.17	70.68	2.12798	0	0	GO:0016023//cytoplasmic membrane-bounded vesicle	GO:0016787//hydrolase activity	GO:0006629//lipid metabolic process	gi|32454820|gb|AAP83162.1|/5e-08/phospholipase A2 [Mirabilis jalapa]
Unigene18411_Taxus	13	RawIntensity-ye	4.12	17.96	2.12407	1.88738e-07	1.03965e-06	-	-	-	gi|15222058|ref|NP_172735.1|/3e-90/ATRBL6 (ARABIDOPSIS RHOMBOID-LIKE PROTEIN 6) [Arabidopsis thaliana] >gi|145323878|ref|NP_001077528.1| ATRBL6 (ARABIDOPSIS RHOMBOID-LIKE PROTEIN 6) [Arabidopsis thaliana]
Unigene14852_Taxus	60	RawIntensity-ye	19.03	82.85	2.12223	0	0	-	-	-	gi|115481108|ref|NP_001064147.1|/3e-09/Os10g0142100 [Oryza sativa (japonica cultivar-group)] >gi|78707751|gb|ABB46726.1| Zinc finger, C3HC4 type family protein, expressed [Oryza sativa (japonica cultivar-group)] >gi|110288599|gb|ABB46725.2| Zinc finger, C3HC4 type family protein, expressed [Oryza sativa (japonica cultivar-group)] >gi|113638756|dbj|BAF26061.1| Os10g0142100 [Oryza sativa Japonica G…
Unigene3406_Taxus	16	RawIntensity-ye	5.07	22.02	2.11876	2.06264e-08	1.29697e-07	-	-	-	-
Unigene30236_Taxus	88	RawIntensity-ye	27.91	120.8	2.11377	1.59872e-14	2.11393e-13	-	-	-	-
Unigene31618_Taxus	26	RawIntensity-ye	8.24	35.63	2.11238	2.13698e-11	1.84005e-10	-	-	-	gi|224004596|ref|XP_002295949.1|/6e-20/demethylmenaquinone methyltransferase [Thalassiosira pseudonana CCMP1335] >gi|209585981|gb|ACI64666.1| demethylmenaquinone methyltransferase [Thalassiosira pseudonana CCMP1335]
Unigene35678_Taxus	15	RawIntensity-ye	4.76	20.57	2.11151	4.28974e-08	2.58274e-07	-	-	-	gi|226492308|ref|NP_001149657.1|/1e-140/serine/threonine-protein kinase SAPK8 [Zea mays] >gi|188011171|gb|ACD44937.1| osmotic stress/ABA-activated protein kinase [Zea mays] >gi|195629240|gb|ACG36261.1| serine/threonine-protein kinase SAPK8 [Zea mays]
Unigene31091_Taxus	25	RawIntensity-ye	7.93	34.18	2.10776	4.19908e-11	3.51146e-10	-	-	-	-
Unigene6834_Taxus	7	RawIntensity-ye	2.22	9.56	2.10645	9.08576e-05	0.000326819	-	-	-	gi|15238445|ref|NP_201344.1|/2e-45/HB25 (HOMEOBOX PROTEIN 25); DNA binding / sequence-specific DNA binding / transcription factor/ transcription regulator [Arabidopsis thaliana] >gi|73921140|sp|Q9FKP8.1|Y5541_ARATH RecName: Full=ZF-HD homeobox protein At5g65410 >gi|30023758|gb|AAP13412.1| At5g65410 [Arabidopsis thaliana]
Unigene34442_Taxus	24	RawIntensity-ye	7.61	32.73	2.10465	8.29868e-11	6.71506e-10	-	-	-	gi|115446187|ref|NP_001046873.1|/5e-17/Os02g0491400 [Oryza sativa (japonica cultivar-group)] >gi|113536404|dbj|BAF08787.1| Os02g0491400 [Oryza sativa Japonica Group]
Unigene19687_Taxus	10	RawIntensity-ye	3.17	13.62	2.10317	3.44554e-06	1.59768e-05	-	-	-	gi|17064728|gb|AAL32518.1|/3e-66/Unknown protein [Arabidopsis thaliana]
Unigene19820_Taxus	10	RawIntensity-ye	3.17	13.62	2.10317	3.44554e-06	1.59727e-05	-	-	-	gi|108708573|gb|ABF96368.1|/2e-26/Zinc finger, C3HC4 type family protein [Oryza sativa (japonica cultivar-group)]
Unigene2071_Taxus	76	RawIntensity-ye	24.1	103.42	2.10141	0	0	GO:0009501//amyloplast;GO:0009507//chloroplast	GO:0009011//starch synthase activity	GO:0019252//starch biosynthetic process	gi|450485|dbj|BAA03739.1|/0.0/soluble starch synthase precursor [Oryza sativa]
Unigene8599_Taxus	26	RawIntensity-ye	8.24	35.34	2.10059	2.1377e-11	1.83979e-10	-	-	-	gi|15238041|ref|NP_199533.1|/2e-33/ERF2 (ETHYLENE RESPONSIVE ELEMENT BINDING FACTOR 2); DNA binding / transcription activator/ transcription factor [Arabidopsis thaliana] >gi|7531108|sp|O80338.1|EF101_ARATH RecName: Full=Ethylene-responsive transcription factor 2; Short=AtERF2; AltName: Full=Ethylene-responsive element-binding factor 2; Short=EREBP-2 >gi|3434969|dbj|BAA32419.1| ethylene responsiv…
Unigene16691_Taxus	48	RawIntensity-ye	15.22	65.18	2.09846	8.52652e-14	1.0312e-12	GO:0009535//chloroplast thylakoid membrane	-	GO:0006979//response to oxidative stress	gi|115442003|ref|NP_001045281.1|/7e-42/Os01g0929100 [Oryza sativa (japonica cultivar-group)] >gi|113534812|dbj|BAF07195.1| Os01g0929100 [Oryza sativa Japonica Group]
Unigene12181_Taxus	19	RawIntensity-ye	6.03	25.78	2.09602	2.58402e-09	1.79475e-08	-	-	-	gi|190409146|gb|EDV12411.1|/1e-51/serine/threonine protein kinase [Saccharomyces cerevisiae RM11-1a]
Unigene19324_Taxus	33	RawIntensity-ye	10.46	44.61	2.09248	3.33956e-13	3.56669e-12	-	-	-	gi|115457354|ref|NP_001052277.1|/3e-06/Os04g0224600 [Oryza sativa (japonica cultivar-group)] >gi|38344128|emb|CAE01764.2| OSJNBb0072N21.7 [Oryza sativa (japonica cultivar-group)] >gi|113563848|dbj|BAF14191.1| Os04g0224600 [Oryza sativa Japonica Group]
Unigene32714_Taxus	27	RawIntensity-ye	8.56	36.5	2.09221	1.0925e-11	9.79119e-11	-	-	-	gi|168061745|ref|XP_001782847.1|/3e-31/predicted protein [Physcomitrella patens subsp. patens] >gi|162665685|gb|EDQ52361.1| predicted protein [Physcomitrella patens subsp. patens]
Unigene24069_Taxus	391	RawIntensity-ye	123.99	528.09	2.09056	5.56666e-13	5.77393e-12	-	-	-	-
Unigene15772_Taxus	12	RawIntensity-ye	3.81	16.22	2.08991	5.49782e-07	2.84389e-06	-	-	-	gi|16604320|gb|AAL24166.1|/2e-08/AT5g65480/K19O4_1 [Arabidopsis thaliana] >gi|19699194|gb|AAL90963.1| AT5g65480/K19O4_1 [Arabidopsis thaliana]
Unigene34254_Taxus	29	RawIntensity-ye	9.2	39.11	2.08783	2.99182e-12	2.83671e-11	-	-	-	gi|11467648|ref|NP_050700.1|/4e-06/ribosomal protein S6 [Guillardia theta] >gi|6094139|sp|O78447.1|RR6_GUITH RecName: Full=30S ribosomal protein S6, chloroplastic >gi|3602973|gb|AAC35634.1| ribosomal protein S6 [Guillardia theta]
Unigene19191_Taxus	17	RawIntensity-ye	5.39	22.88	2.08573	1.07391e-08	6.98446e-08	-	-	-	gi|9295724|gb|AAF87030.1|AC006535_8/5e-11/T24P13.13 [Arabidopsis thaliana]
Unigene14122_Taxus	96	RawIntensity-ye	30.44	129.2	2.08557	0	0	-	GO:0005488//binding	-	gi|226505342|ref|NP_001148879.1|/2e-07/protein binding protein [Zea mays] >gi|195622886|gb|ACG33273.1| protein binding protein [Zea mays]
Unigene13288_Taxus	143	RawIntensity-ye	45.35	192.35	2.08456	0	0	-	-	-	-
Unigene33807_Taxus	33	RawIntensity-ye	10.46	44.32	2.08308	3.33956e-13	3.57305e-12	-	-	-	gi|224284413|gb|ACN39941.1|/2e-08/unknown [Picea sitchensis]
Unigene36353_Taxus	19	RawIntensity-ye	6.03	25.49	2.0797	2.62522e-09	1.82196e-08	-	-	-	gi|19885|emb|CAA47324.1|/1e-170/monosaccharid transporter [Nicotiana tabacum]
Unigene34227_Taxus	8	RawIntensity-ye	2.54	10.72	2.0774	3.86684e-05	0.000148501	-	-	-	gi|79366428|ref|NP_176072.3|/1e-12/carboxylesterase [Arabidopsis thaliana]
Unigene18661_Taxus	13	RawIntensity-ye	4.12	17.38	2.07671	2.58916e-07	1.40303e-06	-	-	-	gi|116057935|emb|CAL54138.1|/9e-06/COG0806: RimM protein, required for 16S rRNA processing (ISS) [Ostreococcus tauri]
Unigene26258_Taxus	112	RawIntensity-ye	35.52	149.77	2.07605	0	0	-	-	-	-
Unigene8298_Taxus	25	RawIntensity-ye	7.93	33.31	2.07056	4.21244e-11	3.521e-10	-	-	-	gi|115452161|ref|NP_001049681.1|/2e-50/Os03g0269900 [Oryza sativa (japonica cultivar-group)] >gi|113548152|dbj|BAF11595.1| Os03g0269900 [Oryza sativa Japonica Group]
Unigene13083_Taxus	25	RawIntensity-ye	7.93	33.31	2.07056	4.21244e-11	3.51936e-10	-	-	-	gi|81295664|gb|ABB70125.1|/7e-35/homogentisate phytyltransferase VTE2-1 [Cuphea pulcherrima]
Unigene15428_Taxus	57	RawIntensity-ye	18.08	75.9	2.06971	2.73114e-14	3.52327e-13	-	-	-	gi|219560622|gb|ACL27578.1|/3e-11/DnaJ cysteine-rich-domain [Cucumis melo]
Unigene30950_Taxus	17	RawIntensity-ye	5.39	22.6	2.06797	1.13013e-08	7.33422e-08	-	-	-	gi|71151963|sp|Q8L725.1|MTPC1_ARATH/9e-18/RecName: Full=Metal tolerance protein C1; Short=AtMTPc1; AltName: Full=AtMTP6 >gi|30387579|gb|AAP31955.1| At2g47830 [Arabidopsis thaliana]
Unigene16537_Taxus	43	RawIntensity-ye	13.64	57.07	2.06489	1.03917e-13	1.22308e-12	-	-	-	gi|116057853|emb|CAL54056.1|/7e-15/IojAP protein-like (ISS) [Ostreococcus tauri]
Unigene13830_Taxus	12	RawIntensity-ye	3.81	15.93	2.06388	7.10552e-07	3.63373e-06	GO:0005730//nucleolus;GO:0005819//spindle;GO:0005618//cell wall;GO:0009524//phragmoplast	-	-	gi|115472635|ref|NP_001059916.1|/1e-22/Os07g0545500 [Oryza sativa (japonica cultivar-group)] >gi|122167218|sp|Q0D5P3.1|FH11_ORYSJ RecName: Full=Formin-like protein 11; AltName: Full=OsFH11; Flags: Precursor >gi|113611452|dbj|BAF21830.1| Os07g0545500 [Oryza sativa Japonica Group]
Unigene19577_Taxus	12	RawIntensity-ye	3.81	15.93	2.06388	7.10552e-07	3.6327e-06	-	-	-	gi|79444306|ref|NP_190991.2|/1e-29/nucleic acid binding / nucleotide binding / zinc ion binding [Arabidopsis thaliana]
Unigene18513_Taxus	7	RawIntensity-ye	2.22	9.27	2.06201	0.000141229	0.000484384	-	-	-	-
Unigene26660_Taxus	48	RawIntensity-ye	15.22	63.44	2.05942	8.52652e-14	1.0319e-12	-	-	-	-
Unigene11845_Taxus	40	RawIntensity-ye	12.68	52.72	2.0558	8.37108e-14	1.01788e-12	-	-	-	gi|21655193|gb|AAM28911.1|/6e-14/NBS/LRR [Pinus taeda]
Unigene3358_Taxus	28	RawIntensity-ye	8.88	36.79	2.05068	5.64882e-12	5.2078e-11	-	-	-	gi|49182340|gb|AAT57672.1|/1e-147/cellulose synthase catalytic subunit [Pinus radiata]
Unigene19622_Taxus	23	RawIntensity-ye	7.29	30.13	2.04721	1.67558e-10	1.31389e-09	-	-	-	gi|255679014|dbj|BAH94642.1|/1e-52/Os09g0491692 [Oryza sativa Japonica Group]
Unigene10030_Taxus	21	RawIntensity-ye	6.66	27.52	2.04689	6.74668e-10	5.00467e-09	-	-	-	gi|168002321|ref|XP_001753862.1|/6e-19/predicted protein [Physcomitrella patens subsp. patens] >gi|162694838|gb|EDQ81184.1| predicted protein [Physcomitrella patens subsp. patens]
Unigene18312_Taxus	25	RawIntensity-ye	7.93	32.73	2.04522	4.23898e-11	3.53989e-10	-	-	-	gi|115401922|ref|XP_001216549.1|/2e-07/thioredoxin [Aspergillus terreus NIH2624] >gi|114190490|gb|EAU32190.1| thioredoxin [Aspergillus terreus NIH2624]
Unigene24133_Taxus	51	RawIntensity-ye	16.17	66.63	2.04285	0	0	-	-	-	-
Unigene21026_Taxus	10	RawIntensity-ye	3.17	13.04	2.04039	7.1543e-06	3.12194e-05	-	-	-	gi|194477089|ref|YP_002049268.1|/3e-07/30S ribosomal protein S1 [Paulinella chromatophora] >gi|171192096|gb|ACB43058.1| 30S ribosomal protein S1 [Paulinella chromatophora]
Unigene34430_Taxus	30	RawIntensity-ye	9.51	39.11	2.04002	1.60538e-12	1.56758e-11	-	-	-	gi|6685165|gb|AAF23823.1|AF219380_1/6e-32/beta-glucosidase [Arabidopsis thaliana]
Unigene20280_Taxus	38	RawIntensity-ye	12.05	49.54	2.03956	7.4607e-14	9.15844e-13	-	-	-	gi|16118887|gb|AAL14644.1|AF417856_1/8e-27/AOP1.2 [Arabidopsis thaliana]
Unigene7908_Taxus	8	RawIntensity-ye	2.54	10.43	2.03784	5.94066e-05	0.000222586	-	-	-	gi|224286611|gb|ACN41010.1|/3e-09/unknown [Picea sitchensis]
Unigene36214_Taxus	101	RawIntensity-ye	32.03	131.52	2.03779	0	0	-	-	-	gi|18395060|ref|NP_564154.1|/1e-129/DD46; galactosyltransferase/ transferase, transferring hexosyl groups [Arabidopsis thaliana] >gi|75174713|sp|Q9LM60.1|B3GT5_ARATH RecName: Full=Probable beta-1,3-galactosyltransferase 5 >gi|9280694|gb|AAF86563.1|AC069252_22 F2E2.6 [Arabidopsis thaliana]
Unigene36379_Taxus	59	RawIntensity-ye	18.71	76.48	2.03127	3.10862e-15	4.36711e-14	-	GO:0051536//iron-sulfur cluster binding	GO:0016226//iron-sulfur cluster assembly	gi|21554503|gb|AAM63593.1|/4e-18/nitrogen fixation like protein [Arabidopsis thaliana]
Unigene16077_Taxus	45	RawIntensity-ye	14.27	58.23	2.02878	0	0	-	-	-	gi|68300841|gb|AAY89359.1|/1e-05/RNA polymerase IV largest subunit [Solanum lycopersicum]
Unigene10610_Taxus	142	RawIntensity-ye	45.03	183.37	2.0258	2.64678e-13	2.88152e-12	-	-	-	gi|32815065|gb|AAP86247.2|/2e-11/glycinamide ribonucleotide transformylase [Glycine max]
Unigene14099_Taxus	35	RawIntensity-ye	11.1	45.19	2.02544	1.45217e-13	1.64879e-12	-	-	-	-
Unigene2189_Taxus	22	RawIntensity-ye	6.98	28.39	2.02408	3.46188e-10	2.63871e-09	GO:0030127//COPII vesicle coat	GO:0008270//zinc ion binding	GO:0006886//intracellular protein transport;GO:0006888//ER to Golgi vesicle-mediated transport	gi|74638434|sp|Q9C284.1|SEC23_NEUCR/1e-19/RecName: Full=Protein transport protein sec-23 >gi|12718409|emb|CAC28788.1| probable SEC23 [Neurospora crassa]
Unigene34737_Taxus	22	RawIntensity-ye	6.98	28.39	2.02408	3.46188e-10	2.63759e-09	-	-	-	-
Unigene35539_Taxus	22	RawIntensity-ye	6.98	28.39	2.02408	3.46188e-10	2.63648e-09	-	-	-	gi|50554149|ref|XP_504483.1|/4e-15/YALI0E27808p [Yarrowia lipolytica] >gi|74633279|sp|Q6C4C9.1|FKBP3_YARLI RecName: Full=FK506-binding protein 3; AltName: Full=Peptidyl-prolyl cis-trans isomerase; Short=PPIase; AltName: Full=Rotamase >gi|49650352|emb|CAG80086.1| YALI0E27808p [Yarrowia lipolytica]
Unigene852_Taxus	25	RawIntensity-ye	7.93	32.15	2.01943	4.30434e-11	3.59281e-10	-	GO:0004553//hydrolase activity, hydrolyzing O-glycosyl compounds	-	gi|115438633|ref|NP_001043596.1|/4e-22/Os01g0619800 [Oryza sativa (japonica cultivar-group)] >gi|113533127|dbj|BAF05510.1| Os01g0619800 [Oryza sativa Japonica Group]
Unigene16774_Taxus	7	RawIntensity-ye	2.22	8.98	2.01616	0.000220748	0.000737575	-	-	-	gi|11465680|ref|NP_053824.1|/2e-08/ORF20 [Porphyra purpurea] >gi|1723324|sp|P51214.1|YCF20_PORPU RecName: Full=Uncharacterized protein ycf20
Unigene16190_Taxus	7	RawIntensity-ye	2.22	8.98	2.01616	0.000220748	0.000737438	-	-	-	gi|225561670|gb|EEH09950.1|/1e-163/translocation elongation factor [Ajellomyces capsulatus G186AR]
Unigene23359_Taxus	31	RawIntensity-ye	9.83	39.69	2.01351	9.02612e-13	9.0644e-12	-	-	-	-
Unigene24213_Taxus	12	RawIntensity-ye	3.81	15.35	2.01038	1.36185e-06	6.69248e-06	-	-	-	-
Unigene28928_Taxus	10	RawIntensity-ye	3.17	12.75	2.00794	1.07224e-05	4.58556e-05	-	-	-	-
Unigene22422_Taxus	10	RawIntensity-ye	3.17	12.75	2.00794	1.07224e-05	4.58447e-05	-	-	-	-
Unigene30983_Taxus	231	RawIntensity-ye	73.25	294.32	2.00648	7.9714e-14	9.70591e-13	-	-	-	-
Unigene8883_Taxus	23	RawIntensity-ye	7.29	29.26	2.00494	1.78471e-10	1.39702e-09	-	-	-	gi|115442091|ref|NP_001045325.1|/3e-21/Os01g0936000 [Oryza sativa (japonica cultivar-group)]
Unigene25588_Taxus	84	RawIntensity-ye	26.64	106.89	2.00446	0	0	-	-	-	-
Unigene8644_Taxus	31	RawIntensity-ye	9.83	39.4	2.00293	9.04166e-13	9.07494e-12	-	-	-	-
Unigene20892_Taxus	13	RawIntensity-ye	4.12	16.51	2.00262	6.00662e-07	3.09639e-06	-	-	-	gi|3252854|gb|AAC39483.1|/0.0/glutamate decarboxylase isozyme 2 [Nicotiana tabacum]
Unigene524_Taxus	26	RawIntensity-ye	8.24	33.02	2.00262	2.20958e-11	1.90075e-10	-	-	-	gi|115434566|ref|NP_001042041.1|/1e-49/Os01g0151600 [Oryza sativa (japonica cultivar-group)] >gi|113531572|dbj|BAF03955.1| Os01g0151600 [Oryza sativa Japonica Group]
Unigene22468_Taxus	61	RawIntensity-ye	19.34	77.34	1.99963	1.5099e-14	2.00533e-13	GO:0016021//integral to membrane	-	-	gi|224112947|ref|XP_002316342.1|/2e-12/stress-induced hydrophobic peptide [Populus trichocarpa] >gi|222865382|gb|EEF02513.1| stress-induced hydrophobic peptide [Populus trichocarpa]
Unigene26750_Taxus	40	RawIntensity-ye	12.68	50.69	1.99915	8.37108e-14	1.0165e-12	-	-	-	-
Unigene12428_Taxus	43	RawIntensity-ye	13.64	54.46	1.99735	1.03917e-13	1.22468e-12	GO:0016020//membrane;GO:0009536//plastid	GO:0015450//P-P-bond-hydrolysis-driven protein transmembrane transporter activity	GO:0009688//abscisic acid biosynthetic process;GO:0009306//protein secretion	gi|11465730|ref|NP_053874.1|/1e-53/Sec-independent translocase component C [Porphyra purpurea] >gi|1723345|sp|P51264.1|YCF43_PORPU RecName: Full=Uncharacterized tatC-like protein ycf43 >gi|1276730|gb|AAC08150.1| ORF254 [Porphyra purpurea]
Unigene23353_Taxus	30	RawIntensity-ye	9.51	37.95	1.99658	1.61893e-12	1.57824e-11	-	-	-	-
Unigene36162_Taxus	33	RawIntensity-ye	10.46	41.71	1.99551	3.34622e-13	3.56957e-12	-	-	-	gi|119358800|emb|CAL52078.2|/4e-35/Ccd-Arp undefined product (IC) [Ostreococcus tauri]
Unigene3605_Taxus	11	RawIntensity-ye	3.49	13.9	1.99379	4.59888e-06	2.0873e-05	-	-	-	gi|116781433|gb|ABK22098.1|/2e-31/unknown [Picea sitchensis]
Unigene20370_Taxus	23	RawIntensity-ye	7.29	28.97	1.99057	1.86794e-10	1.459e-09	-	-	-	gi|12655933|gb|AAK00662.1|AF229390_1/1e-93/omega 6 reductase [Brassica rapa]
Unigene15556_Taxus	32	RawIntensity-ye	10.15	40.27	1.98823	5.3979e-13	5.60858e-12	-	-	-	gi|122937697|gb|ABM68560.1|/2e-07/retrotransposon protein [Lilium longiflorum]
Unigene10396_Taxus	38	RawIntensity-ye	12.05	47.8	1.98798	7.4607e-14	9.17095e-13	-	-	-	gi|145343626|ref|XP_001416417.1|/5e-07/conserved protein probably involved in Fe-S center assembly [Ostreococcus lucimarinus CCE9901] >gi|144576642|gb|ABO94710.1| conserved protein probably involved in Fe-S center assembly [Ostreococcus lucimarinus CCE9901]
Unigene19291_Taxus	9	RawIntensity-ye	2.85	11.3	1.98729	3.86252e-05	0.000148367	-	-	-	-
Unigene23500_Taxus	89	RawIntensity-ye	28.22	111.82	1.98639	0	0	-	-	-	-
Unigene36052_Taxus	28	RawIntensity-ye	8.88	35.05	1.98078	5.8471e-12	5.37408e-11	-	-	-	gi|115479519|ref|NP_001063353.1|/1e-130/Os09g0454600 [Oryza sativa (japonica cultivar-group)] >gi|113631586|dbj|BAF25267.1| Os09g0454600 [Oryza sativa Japonica Group]
Unigene14033_Taxus	13	RawIntensity-ye	4.12	16.22	1.97706	8.62108e-07	4.34823e-06	-	-	-	gi|261195068|ref|XP_002623938.1|/1e-42/carbohydrate kinase [Ajellomyces dermatitidis SLH14081] >gi|239587810|gb|EEQ70453.1| carbohydrate kinase [Ajellomyces dermatitidis SLH14081]
Unigene10296_Taxus	13	RawIntensity-ye	4.12	16.22	1.97706	8.62108e-07	4.34701e-06	-	-	-	gi|115468472|ref|NP_001057835.1|/3e-07/Os06g0550800 [Oryza sativa (japonica cultivar-group)] >gi|113595875|dbj|BAF19749.1| Os06g0550800 [Oryza sativa Japonica Group]
Unigene12096_Taxus	10	RawIntensity-ye	3.17	12.46	1.97475	1.63086e-05	6.72524e-05	-	-	-	gi|115440343|ref|NP_001044451.1|/2e-07/Os01g0783100 [Oryza sativa (japonica cultivar-group)] >gi|113533982|dbj|BAF06365.1| Os01g0783100 [Oryza sativa Japonica Group]
Unigene20429_Taxus	10	RawIntensity-ye	3.17	12.46	1.97475	1.63086e-05	6.7237e-05	-	-	-	gi|20249|emb|CAA48328.1|/2e-07/gt-2 [Oryza sativa (indica cultivar-group)]
Unigene27648_Taxus	458	RawIntensity-ye	145.23	570.09	1.97285	1.4535e-12	1.4278e-11	-	-	-	-
Unigene18428_Taxus	39	RawIntensity-ye	12.37	48.38	1.96757	9.39248e-14	1.11349e-12	-	-	-	gi|116060733|emb|CAL57211.1|/2e-36/syntaxin (ISS) [Ostreococcus tauri]
Unigene6948_Taxus	47	RawIntensity-ye	14.9	58.23	1.96645	0	0	-	-	-	-
Unigene32031_Taxus	18	RawIntensity-ye	5.71	22.31	1.96613	1.12091e-08	7.27702e-08	-	-	-	-
Unigene35653_Taxus	48	RawIntensity-ye	15.22	59.38	1.96401	8.52652e-14	1.03051e-12	-	-	-	gi|116055837|emb|CAL57922.1|/4e-07/FKBP-type peptidyl-prolyl cis-trans isomerase (ISS) [Ostreococcus tauri]
Unigene20827_Taxus	30	RawIntensity-ye	9.51	37.08	1.96312	1.66378e-12	1.62108e-11	-	-	-	gi|18481961|gb|AAL73559.1|AC079632_3/2e-08/Unknown protein [Oryza sativa Japonica Group] >gi|19920208|gb|AAM08640.1|AC108883_13 Putative dehydrogenase [Oryza sativa Japonica Group]
Unigene3272_Taxus	88	RawIntensity-ye	27.91	108.63	1.96057	1.59872e-14	2.11549e-13	-	-	-	gi|195617456|gb|ACG30558.1|/6e-22/RING finger protein 5 [Zea mays]
Unigene2347_Taxus	8	RawIntensity-ye	2.54	9.85	1.9553	0.000143117	0.000490017	-	-	-	gi|186511602|ref|NP_849538.2|/3e-35/kinase [Arabidopsis thaliana] >gi|281185491|sp|Q8VZG8.3|Y4885_ARATH RecName: Full=Probable LRR receptor-like serine/threonine-protein kinase At4g08850; Flags: Precursor >gi|18086327|gb|AAL57627.1| AT4g08850/T32A17_160 [Arabidopsis thaliana] >gi|224589610|gb|ACN59338.1| leucine-rich repeat receptor-like protein kinase [Arabidopsis thaliana]
Unigene18450_Taxus	8	RawIntensity-ye	2.54	9.85	1.9553	0.000143117	0.000489924	-	-	-	gi|15238792|ref|NP_199582.1|/1e-12/C2 domain-containing protein [Arabidopsis thaliana] >gi|145334767|ref|NP_001078729.1| C2 domain-containing protein [Arabidopsis thaliana] >gi|28466847|gb|AAO44032.1| At5g47710 [Arabidopsis thaliana]
Unigene18440_Taxus	33	RawIntensity-ye	10.46	40.56	1.95517	3.38618e-13	3.60152e-12	-	-	-	gi|45185590|ref|NP_983306.1|/4e-52/ACL098Cp [Ashbya gossypii ATCC 10895] >gi|44981308|gb|AAS51130.1| ACL098Cp [Ashbya gossypii ATCC 10895]
Unigene33478_Taxus	21	RawIntensity-ye	6.66	25.78	1.95266	1.12357e-09	8.12039e-09	-	-	-	gi|5902707|sp|Q40412.1|ABA2_NICPL/1e-06/RecName: Full=Zeaxanthin epoxidase, chloroplastic; Flags: Precursor >gi|1370274|emb|CAA65048.1| zeaxanthin epoxidase [Nicotiana plumbaginifolia]
Unigene33504_Taxus	94	RawIntensity-ye	29.81	115.29	1.9514	0	0	GO:0016020//membrane	-	-	gi|79567618|ref|NP_180949.2|/6e-23/calcium ion binding [Arabidopsis thaliana]
Unigene29614_Taxus	135	RawIntensity-ye	42.81	165.41	1.95003	1.96732e-13	2.17468e-12	-	-	-	-
Unigene19714_Taxus	58	RawIntensity-ye	18.39	70.97	1.94829	0	0	-	-	-	-
Unigene16465_Taxus	14	RawIntensity-ye	4.44	17.09	1.94452	5.47998e-07	2.83547e-06	GO:0005739//mitochondrion	-	-	gi|115482726|ref|NP_001064956.1|/2e-39/Os10g0497000 [Oryza sativa (japonica cultivar-group)] >gi|78708850|gb|ABB47825.1| expressed protein [Oryza sativa (japonica cultivar-group)] >gi|113639565|dbj|BAF26870.1| Os10g0497000 [Oryza sativa Japonica Group]
Unigene31283_Taxus	52	RawIntensity-ye	16.49	63.44	1.9438	2.4869e-14	3.22902e-13	-	-	-	-
Unigene30508_Taxus	24	RawIntensity-ye	7.61	29.26	1.94296	1.20177e-10	9.57798e-10	-	-	-	-
Unigene18031_Taxus	24	RawIntensity-ye	7.61	29.26	1.94296	1.20177e-10	9.57374e-10	-	-	-	gi|77554399|gb|ABA97195.1|/4e-07/expressed protein [Oryza sativa (japonica cultivar-group)]
Unigene36354_Taxus	15	RawIntensity-ye	4.76	18.25	1.93886	2.37876e-07	1.29565e-06	-	-	-	gi|86991202|gb|ABD16062.1|/9e-14/Kelch-motif containing protein [Oryza rufipogon]
Unigene20945_Taxus	16	RawIntensity-ye	5.07	19.41	1.93674	1.03848e-07	5.9385e-07	-	-	-	gi|40018852|gb|AAR36911.1|/2e-13/disease resistance gene [Pinus sylvestris]
Unigene8249_Taxus	48	RawIntensity-ye	15.22	58.23	1.93579	8.52652e-14	1.02982e-12	-	-	-	gi|226493860|ref|NP_001151935.1|/1e-05/calmodulin binding protein [Zea mays] >gi|195651211|gb|ACG45073.1| calmodulin binding protein [Zea mays]
Unigene32474_Taxus	76	RawIntensity-ye	24.1	92.12	1.93448	0	0	-	-	-	gi|195627620|gb|ACG35640.1|/5e-13/thioredoxin H-type 5 [Zea mays]
Unigene9207_Taxus	77	RawIntensity-ye	24.42	93.28	1.9335	0	0	-	-	-	gi|75114857|sp|Q655S1.1|FTSH2_ORYSJ/2e-54/RecName: Full=Cell division protease ftsH homolog 2, chloroplastic; Short=OsFtsH2; Flags: Precursor
Unigene20995_Taxus	11	RawIntensity-ye	3.49	13.33	1.93338	1.05468e-05	4.51476e-05	-	-	-	gi|225445706|ref|XP_002269611.1|/3e-10/PREDICTED: hypothetical protein [Vitis vinifera]
Unigene10270_Taxus	23	RawIntensity-ye	7.29	27.81	1.93161	2.99852e-10	2.30407e-09	-	-	-	gi|129282606|gb|ABO30294.1|/5e-65/nodulin-related protein [Triticum turgidum subsp. dicoccon]
Unigene34956_Taxus	12	RawIntensity-ye	3.81	14.48	1.9262	4.46832e-06	2.03214e-05	-	-	-	gi|168039004|ref|XP_001771989.1|/9e-35/predicted protein [Physcomitrella patens subsp. patens] >gi|162676771|gb|EDQ63250.1| predicted protein [Physcomitrella patens subsp. patens]
Unigene117_Taxus	50	RawIntensity-ye	15.86	60.25	1.92557	9.32588e-15	1.25526e-13	-	-	-	-
Unigene26955_Taxus	63	RawIntensity-ye	19.98	75.9	1.92554	0	0	-	-	-	-
Unigene20602_Taxus	260	RawIntensity-ye	82.45	312.28	1.92125	4.30544e-13	4.51519e-12	-	-	-	gi|15224852|ref|NP_179571.1|/4e-49/zinc finger (CCCH-type) family protein [Arabidopsis thaliana] >gi|75220226|sp|O82199.1|C3H20_ARATH RecName: Full=Zinc finger CCCH domain-containing protein 20; Short=AtC3H20
Unigene1056_Taxus	14	RawIntensity-ye	4.44	16.8	1.91983	8.13526e-07	4.11011e-06	-	-	-	gi|77548387|gb|ABA91184.1|/7e-21/hydrolase, alpha/beta fold family protein, expressed [Oryza sativa (japonica cultivar-group)] >gi|77548388|gb|ABA91185.1| hydrolase, alpha/beta fold family protein, expressed [Oryza sativa (japonica cultivar-group)] >gi|77548389|gb|ABA91186.1| hydrolase, alpha/beta fold family protein, expressed [Oryza sativa (japonica cultivar-group)]
Unigene26104_Taxus	22	RawIntensity-ye	6.98	26.36	1.91705	8.2005e-10	6.05814e-09	-	-	-	gi|1350526|gb|AAB01565.1|/2e-15/glycine-rich cell wall protein [Picea glauca]
Unigene35321_Taxus	15	RawIntensity-ye	4.76	17.96	1.91575	3.49576e-07	1.86344e-06	-	-	-	gi|119358846|emb|CAL52252.2|/1e-06/Cao undefined product (IC) [Ostreococcus tauri]
Unigene28054_Taxus	31	RawIntensity-ye	9.83	37.08	1.91538	1.05116e-12	1.04976e-11	-	-	-	-
Unigene26659_Taxus	55	RawIntensity-ye	17.44	65.76	1.91481	0	0	-	-	-	-
Unigene10025_Taxus	41	RawIntensity-ye	13	48.96	1.91309	1.26787e-13	1.45329e-12	-	-	-	gi|255673068|dbj|BAH90991.1|/2e-07/Os01g0253500 [Oryza sativa Japonica Group]
Unigene18722_Taxus	8	RawIntensity-ye	2.54	9.56	1.91218	0.000222678	0.000743334	-	-	-	gi|226454190|gb|EEH51497.1|/3e-19/predicted protein [Micromonas pusilla CCMP1545]
Unigene17456_Taxus	8	RawIntensity-ye	2.54	9.56	1.91218	0.000222678	0.000743196	-	-	-	gi|15219751|ref|NP_176853.1|/8e-06/zinc finger (CCCH-type) family protein [Arabidopsis thaliana] >gi|75262243|sp|Q9C9N3.1|C3H14_ARATH RecName: Full=Zinc finger CCCH domain-containing protein 14; Short=AtC3H14
Unigene6473_Taxus	17	RawIntensity-ye	5.39	20.28	1.9117	6.54862e-08	3.87279e-07	-	-	-	-
Unigene22516_Taxus	17	RawIntensity-ye	5.39	20.28	1.9117	6.54862e-08	3.87152e-07	-	-	-	-
Unigene7232_Taxus	42	RawIntensity-ye	13.32	50.11	1.9115	8.83738e-14	1.06096e-12	-	-	-	gi|225442973|ref|XP_002267834.1|/3e-06/PREDICTED: hypothetical protein [Vitis vinifera] >gi|270253921|emb|CBI36319.1| unnamed protein product [Vitis vinifera]
Unigene10723_Taxus	43	RawIntensity-ye	13.64	51.27	1.91027	1.03917e-13	1.22388e-12	-	-	-	gi|186510757|ref|NP_190363.3|/2e-40/ATATH7; ATPase, coupled to transmembrane movement of substances / transporter [Arabidopsis thaliana] >gi|20466398|gb|AAM20516.1| ABC-type transport protein-like protein [Arabidopsis thaliana]
Unigene35332_Taxus	18	RawIntensity-ye	5.71	21.44	1.90874	2.8558e-08	1.76366e-07	-	-	-	gi|3023160|gb|AAC12646.1|/1e-107/geranylgeranyl reductase [Zantedeschia aethiopica]
Unigene15322_Taxus	36	RawIntensity-ye	11.42	42.87	1.90841	1.12133e-13	1.3095e-12	-	-	-	-
Unigene33064_Taxus	19	RawIntensity-ye	6.03	22.6	1.90609	1.25204e-08	8.08458e-08	GO:0009536//plastid	-	-	gi|115450717|ref|NP_001048959.1|/1e-30/Os03g0146500 [Oryza sativa (japonica cultivar-group)] >gi|15451610|gb|AAK98734.1|AC090485_13 Hypothetical protein [Oryza sativa Japonica Group] >gi|108706169|gb|ABF93964.1| expressed protein [Oryza sativa (japonica cultivar-group)] >gi|113547430|dbj|BAF10873.1| Os03g0146500 [Oryza sativa Japonica Group]
Unigene16451_Taxus	10	RawIntensity-ye	3.17	11.88	1.90598	3.854e-05	0.000148103	-	-	-	gi|124360104|gb|ABN08120.1|/7e-06/Legume lectin, beta domain [Medicago truncatula]
Unigene15312_Taxus	71	RawIntensity-ye	22.51	84.3	1.90497	0	0	-	-	-	gi|1346192|sp|P48640.1|GSHRP_SOYBN/1e-158/RecName: Full=Glutathione reductase, chloroplastic; Short=GRase; Short=GR; Flags: Precursor >gi|169965|gb|AAA33962.1| glutathione reductase [Glycine max]
Unigene28744_Taxus	33	RawIntensity-ye	10.46	39.11	1.90265	3.77032e-13	3.98887e-12	-	-	-	gi|116789392|gb|ABK25235.1|/3e-27/unknown [Picea sitchensis]
Unigene36476_Taxus	11	RawIntensity-ye	3.49	13.04	1.90164	1.61625e-05	6.6711e-05	-	-	-	gi|2565436|gb|AAC39436.1|/9e-06/DegP protease precursor [Arabidopsis thaliana]
Unigene21416_Taxus	34	RawIntensity-ye	10.78	40.27	1.90135	2.27818e-13	2.49989e-12	-	-	-	gi|14530687|dbj|BAB61056.1|/3e-91/WRKY DNA-binding protein [Nicotiana tabacum]
Unigene26305_Taxus	57	RawIntensity-ye	18.08	67.5	1.90049	2.73114e-14	3.52074e-13	GO:0016023//cytoplasmic membrane-bounded vesicle	-	-	gi|195629394|gb|ACG36338.1|/8e-08/aldose 1-epimerase [Zea mays]
Unigene14624_Taxus	58	RawIntensity-ye	18.39	68.65	1.90034	0	0	-	-	-	gi|70663961|emb|CAD41459.3|/2e-50/OSJNBa0079A21.3 [Oryza sativa (japonica cultivar-group)]
Unigene14558_Taxus	25	RawIntensity-ye	7.93	29.55	1.89777	1.0141e-10	8.15088e-10	-	-	-	gi|226498472|ref|NP_001149176.1|/1e-140/transparent testa 12 protein [Zea mays] >gi|195625264|gb|ACG34462.1| transparent testa 12 protein [Zea mays]
Unigene22682_Taxus	13	RawIntensity-ye	4.12	15.35	1.89752	2.88128e-06	1.351e-05	-	-	-	-
Unigene15254_Taxus	12	RawIntensity-ye	3.81	14.19	1.89701	6.80944e-06	3.00276e-05	-	-	-	gi|115475041|ref|NP_001061117.1|/2e-07/Os08g0176200 [Oryza sativa (japonica cultivar-group)]
Unigene26708_Taxus	42	RawIntensity-ye	13.32	49.54	1.895	8.83738e-14	1.06025e-12	-	-	-	-
Unigene3503_Taxus	84	RawIntensity-ye	26.64	99.07	1.89485	0	0	-	-	-	gi|255678893|dbj|BAH94562.1|/2e-10/Os09g0411650 [Oryza sativa Japonica Group]
Unigene24150_Taxus	229	RawIntensity-ye	72.62	269.69	1.89286	2.65566e-13	2.88769e-12	-	-	GO:0009451//RNA modification	gi|145049690|gb|ABP35526.1|/1e-13/CCR4-associated factor [Ipomoea batatas]
Unigene12128_Taxus	31	RawIntensity-ye	9.83	36.5	1.89263	1.2621e-12	1.24317e-11	-	-	-	gi|27476076|gb|AAO17007.1|/1e-08/Putative gag-pol polyprotein [Oryza sativa Japonica Group]
Unigene14226_Taxus	32	RawIntensity-ye	10.15	37.66	1.89155	6.9189e-13	7.07458e-12	GO:0016023//cytoplasmic membrane-bounded vesicle	-	-	gi|10177784|dbj|BAB10966.1|/1e-10/receptor protein kinase-like protein [Arabidopsis thaliana]
Unigene12169_Taxus	17	RawIntensity-ye	5.39	19.99	1.89092	9.61814e-08	5.51939e-07	-	-	-	gi|116059595|emb|CAL55302.1|/1e-58/Tab2 protein (ISS) [Ostreococcus tauri]
Unigene20650_Taxus	20	RawIntensity-ye	6.34	23.46	1.88765	7.84902e-09	5.22764e-08	-	-	-	-
Unigene17602_Taxus	19	RawIntensity-ye	6.03	22.31	1.88746	1.80143e-08	1.14756e-07	-	-	-	gi|3913873|sp|O65796.1|HEM13_HORVU/2e-06/RecName: Full=Glutamyl-tRNA reductase 3, chloroplastic; Short=GluTR; Flags: Precursor >gi|2967443|dbj|BAA25168.1| glutamyl-tRNA reductase [Hordeum vulgare subsp. vulgare]
Unigene25969_Taxus	113	RawIntensity-ye	35.83	131.8	1.87911	1.8896e-13	2.10298e-12	-	-	-	-
Unigene19878_Taxus	16	RawIntensity-ye	5.07	18.54	1.87058	3.35672e-07	1.79571e-06	-	-	-	gi|239614239|gb|EEQ91226.1|/4e-31/HD family hydrolase [Ajellomyces dermatitidis ER-3]
Unigene13776_Taxus	13	RawIntensity-ye	4.12	15.06	1.87001	4.39134e-06	1.99865e-05	-	-	-	-
Unigene4004_Taxus	13	RawIntensity-ye	4.12	15.06	1.87001	4.39134e-06	1.99814e-05	-	-	-	-
Unigene12550_Taxus	30	RawIntensity-ye	9.51	34.76	1.86991	3.616e-12	3.41056e-11	-	-	-	gi|115469704|ref|NP_001058451.1|/6e-30/Os06g0695600 [Oryza sativa (japonica cultivar-group)] >gi|113596491|dbj|BAF20365.1| Os06g0695600 [Oryza sativa Japonica Group]
Unigene35700_Taxus	38	RawIntensity-ye	12.05	44.03	1.86945	7.68274e-14	9.37982e-13	-	-	-	gi|115461540|ref|NP_001054370.1|/1e-33/Os04g0692600 [Oryza sativa (japonica cultivar-group)] >gi|113565941|dbj|BAF16284.1| Os04g0692600 [Oryza sativa Japonica Group]
Unigene19188_Taxus	53	RawIntensity-ye	16.81	61.12	1.86232	5.10702e-15	7.03721e-14	-	-	-	gi|150866081|ref|XP_001385557.2|/2e-31/tyrosine phosphatase [Pichia stipitis CBS 6054] >gi|149387337|gb|ABN67528.2| tyrosine phosphatase [Pichia stipitis CBS 6054]
Unigene28227_Taxus	38	RawIntensity-ye	12.05	43.74	1.85992	7.81598e-14	9.52956e-13	-	-	-	gi|221108850|ref|XP_002163737.1|/9e-34/PREDICTED: similar to 2-hydroxyacyl-CoA lyase 1 [Hydra magnipapillata] >gi|124360613|gb|ABN08612.1| Thiamine pyrophosphate enzyme, central region [Medicago truncatula]
Unigene4292_Taxus	23	RawIntensity-ye	7.29	26.36	1.85436	1.36553e-09	9.79047e-09	-	-	-	gi|15232407|ref|NP_190972.1|/1e-25/photoassimilate-responsive protein-related [Arabidopsis thaliana] >gi|7630024|emb|CAB88366.1| photoassimilate-responsive protein PAR-1b-like protein [Arabidopsis thaliana] >gi|18252939|gb|AAL62396.1| photoassimilate-responsive protein PAR-1b -like protein [Arabidopsis thaliana] >gi|21389647|gb|AAM48022.1| photoassimilate-responsive protein PAR-1b-like protein [A…
Unigene9171_Taxus	21	RawIntensity-ye	6.66	24.04	1.85184	7.28972e-09	4.87317e-08	-	-	-	-
Unigene24738_Taxus	20	RawIntensity-ye	6.34	22.88	1.85153	1.69299e-08	1.08385e-07	-	-	-	-
Unigene6458_Taxus	20	RawIntensity-ye	6.34	22.88	1.85153	1.69299e-08	1.08346e-07	-	-	-	gi|21618252|gb|AAM67302.1|/7e-46/RAV-like protein [Arabidopsis thaliana]
Unigene36244_Taxus	37	RawIntensity-ye	11.73	42.29	1.85011	1.00364e-13	1.18514e-12	-	-	-	gi|144905184|dbj|BAF56241.1|/1e-110/cytochrome P450 enzyme [Pisum sativum]
Unigene28610_Taxus	18	RawIntensity-ye	5.71	20.57	1.84898	9.2165e-08	5.30583e-07	-	-	-	gi|38707448|dbj|BAC65128.2|/2e-30/short chain alcohol dehydrogenase-like protein [Daucus carota]
Unigene6034_Taxus	33	RawIntensity-ye	10.46	37.66	1.84815	7.06546e-13	7.21623e-12	-	-	-	gi|88770678|gb|ABD51942.1|/4e-83/chloroplast uroporphyrinogen decarboxylase [Guillardia theta]
Unigene36207_Taxus	109	RawIntensity-ye	34.56	124.27	1.8463	0	0	-	-	-	gi|71608994|emb|CAH58712.1|/3e-52/pectin methylesterase precursor [Physcomitrella patens]
Unigene19327_Taxus	60	RawIntensity-ye	19.03	68.36	1.84488	0	0	-	-	-	gi|68160373|gb|AAY86761.1|/6e-08/HIT family protein 1 [Chaetomium globosum]
Unigene32479_Taxus	14	RawIntensity-ye	4.44	15.93	1.84311	2.82956e-06	1.32744e-05	-	-	-	gi|156598215|gb|ABU85371.1|/2e-25/photosystem II phosphoprotein [Elaeis oleifera]
Unigene33488_Taxus	14	RawIntensity-ye	4.44	15.93	1.84311	2.82956e-06	1.3271e-05	-	-	-	gi|224113661|ref|XP_002316535.1|/7e-39/arogenate/prephenate dehydratase [Populus trichocarpa] >gi|222859600|gb|EEE97147.1| arogenate/prephenate dehydratase [Populus trichocarpa]
Unigene27269_Taxus	99	RawIntensity-ye	31.39	112.4	1.84027	6.4393e-15	8.77227e-14	-	-	-	-
Unigene4920_Taxus	12	RawIntensity-ye	3.81	13.62	1.83786	1.59752e-05	6.60743e-05	-	-	-	gi|22325475|ref|NP_178539.2|/3e-06/cation efflux family protein [Arabidopsis thaliana]
Unigene9326_Taxus	81	RawIntensity-ye	25.69	91.83	1.83776	4.04122e-14	5.10715e-13	-	-	-	-
Unigene15165_Taxus	11	RawIntensity-ye	3.49	12.46	1.83601	3.81686e-05	0.000146864	-	-	-	gi|38345602|emb|CAD41885.2|/6e-06/OSJNBa0093O08.4 [Oryza sativa (japonica cultivar-group)]
Unigene32188_Taxus	11	RawIntensity-ye	3.49	12.46	1.83601	3.81686e-05	0.000146832	-	-	-	-
Unigene36320_Taxus	60	RawIntensity-ye	19.03	67.79	1.8328	0	0	-	-	-	gi|263429453|sp|A8Q0M1.1|GET3_MALGO/3e-42/RecName: Full=ATPase GET3; AltName: Full=Arsenite-stimulated ATPase; AltName: Full=Arsenical pump-driving ATPase; AltName: Full=Golgi to ER traffic protein 3; AltName: Full=Guided entry of tail-anchored proteins 3
Unigene20789_Taxus	9	RawIntensity-ye	2.85	10.14	1.83102	0.000220856	0.000737662	-	-	-	gi|166990623|sp|A7KAI4.1|ATG5_PICAN/3e-19/RecName: Full=Autophagy protein 5 >gi|129714821|gb|ABO31289.1| Atg5p [Pichia angusta]
Unigene3707_Taxus	9	RawIntensity-ye	2.85	10.14	1.83102	0.000220856	0.000737525	-	-	-	gi|2443755|gb|AAB71401.1|/3e-13/cyclophilin [Arabidopsis thaliana]
Unigene19886_Taxus	28	RawIntensity-ye	8.88	31.58	1.83038	4.55274e-11	3.79486e-10	-	-	-	gi|30268666|dbj|BAC76004.1|/4e-25/RelA-SpoT like protein RSH1 [Nicotiana tabacum]
Unigene31391_Taxus	28	RawIntensity-ye	8.88	31.58	1.83038	4.55274e-11	3.79311e-10	-	-	-	-
Unigene12185_Taxus	17	RawIntensity-ye	5.39	19.12	1.82673	3.27062e-07	1.75121e-06	GO:0005634//nucleus	GO:0003700//sequence-specific DNA binding transcription factor activity	GO:0006355//regulation of transcription, DNA-dependent	gi|57012875|sp|Q9LW49.1|ERF4_NICSY/1e-19/RecName: Full=Ethylene-responsive transcription factor 4; AltName: Full=Ethylene-responsive element-binding factor 4 homolog; AltName: Full=Ethylene-responsive element-binding factor 3; Short=EREBP-3; AltName: Full=NsERF3 >gi|8809573|dbj|BAA97123.1| ethylene-responsive element binding factor [Nicotiana sylvestris]
Unigene12607_Taxus	42	RawIntensity-ye	13.32	47.22	1.8258	8.88178e-14	1.06204e-12	-	-	-	gi|238879680|gb|EEQ43318.1|/1e-75/histone deacetylase HDA1 [Candida albicans WO-1]
Unigene4263_Taxus	48	RawIntensity-ye	15.22	53.88	1.82378	8.52652e-14	1.03259e-12	-	-	-	-
Unigene19740_Taxus	119	RawIntensity-ye	37.74	133.54	1.82311	0	0	-	-	-	gi|224116690|ref|XP_002317367.1|/1e-60/global transcription factor group [Populus trichocarpa] >gi|222860432|gb|EEE97979.1| global transcription factor group [Populus trichocarpa]
Unigene8252_Taxus	15	RawIntensity-ye	4.76	16.8	1.81943	1.82208e-06	8.79801e-06	-	-	-	gi|2598964|gb|AAB84030.1|/3e-52/molybdopterin cofactor biosynthetic protein [Emericella nidulans] >gi|259488762|tpe|CBF88467.1| TPA: Molybdopterin cofactor biosynthetic proteinPutative uncharacterized protein ; [Source:UniProtKB/TrEMBL;Acc:O13382] [Aspergillus nidulans FGSC A4]
Unigene29023_Taxus	79	RawIntensity-ye	25.05	88.35	1.81842	0	0	-	-	-	gi|19115116|ref|NP_594204.1|/2e-09/Ariadne homolog [Schizosaccharomyces pombe] >gi|74698267|sp|Q9P3U4.1|YKX2_SCHPO RecName: Full=Uncharacterized RING finger protein C328.02 >gi|8894853|emb|CAB95997.1| human Ariadne homolog [Schizosaccharomyces pombe]
Unigene29287_Taxus	35	RawIntensity-ye	11.1	39.11	1.81698	3.89688e-13	4.11551e-12	-	-	-	gi|159483789|ref|XP_001699943.1|/4e-08/single helix LHC light protein [Chlamydomonas reinhardtii] >gi|54649968|dbj|BAD67135.1| Lhc-like protein Lhl2 [Chlamydomonas reinhardtii] >gi|158281885|gb|EDP07639.1| single helix LHC light protein [Chlamydomonas reinhardtii]
Unigene34194_Taxus	27	RawIntensity-ye	8.56	30.13	1.81552	1.53898e-10	1.21312e-09	-	-	-	gi|262105113|gb|EEY63165.1|/8e-17/thioredoxin-like protein [Phytophthora infestans T30-4]
Unigene20637_Taxus	27	RawIntensity-ye	8.56	30.13	1.81552	1.53898e-10	1.21259e-09	-	-	-	gi|115482940|ref|NP_001065063.1|/7e-94/Os10g0516400 [Oryza sativa (japonica cultivar-group)] >gi|31433063|gb|AAP54623.1| expressed protein [Oryza sativa (japonica cultivar-group)] >gi|113639672|dbj|BAF26977.1| Os10g0516400 [Oryza sativa Japonica Group]
Unigene27168_Taxus	20	RawIntensity-ye	6.34	22.31	1.81514	3.8198e-08	2.31998e-07	-	-	-	-
Unigene16350_Taxus	26	RawIntensity-ye	8.24	28.97	1.81384	3.56456e-10	2.71353e-09	-	-	-	gi|27452902|gb|AAO15286.1|/1e-108/Putative mandelonitrile lyase [Oryza sativa Japonica Group] >gi|108705877|gb|ABF93672.1| GMC oxidoreductase family protein [Oryza sativa (japonica cultivar-group)] >gi|255674163|dbj|BAH91968.1| Os03g0118700 [Oryza sativa Japonica Group]
Unigene25996_Taxus	54	RawIntensity-ye	17.12	59.96	1.80832	1.70974e-14	2.24916e-13	-	-	-	-
Unigene34926_Taxus	24	RawIntensity-ye	7.61	26.65	1.80817	1.92747e-09	1.36401e-08	-	-	-	-
Unigene1099_Taxus	12	RawIntensity-ye	3.81	13.33	1.80681	2.44758e-05	9.79903e-05	GO:0009536//plastid	-	-	gi|116000846|emb|CAL50526.1|/1e-06/OSJNBa0004F07.8 gene product (ISS) [Ostreococcus tauri]
Unigene11204_Taxus	52	RawIntensity-ye	16.49	57.65	1.80573	2.4869e-14	3.23135e-13	GO:0009536//plastid	-	-	gi|149392669|gb|ABR26137.1|/2e-27/calcium homeostasis regulator chor1 [Oryza sativa Indica Group]
Unigene3856_Taxus	16	RawIntensity-ye	5.07	17.67	1.80124	1.17274e-06	5.80118e-06	-	-	-	gi|225426132|ref|XP_002272796.1|/5e-06/PREDICTED: hypothetical protein [Vitis vinifera] >gi|270251025|emb|CBI34399.1| unnamed protein product [Vitis vinifera]
Unigene3170_Taxus	146	RawIntensity-ye	46.3	161.06	1.79851	2.22044e-15	3.15134e-14	-	-	-	gi|42569425|ref|NP_180459.2|/1e-140/APK1B; ATP binding / kinase/ protein kinase/ protein serine/threonine kinase [Arabidopsis thaliana] >gi|119935890|gb|ABM06025.1| At2g28930 [Arabidopsis thaliana]
Unigene12119_Taxus	57	RawIntensity-ye	18.08	62.86	1.79775	2.73114e-14	3.52833e-13	-	-	-	gi|20453122|gb|AAM19803.1|/6e-41/At1g74320/F1O17_1 [Arabidopsis thaliana] >gi|30984574|gb|AAP42750.1| At1g74320 [Arabidopsis thaliana]
Unigene14925_Taxus	91	RawIntensity-ye	28.86	100.23	1.79617	0	0	-	-	-	gi|149247583|ref|XP_001528200.1|/8e-53/protein SUR2 [Lodderomyces elongisporus NRRL YB-4239] >gi|146448154|gb|EDK42542.1| protein SUR2 [Lodderomyces elongisporus NRRL YB-4239]
Unigene2155_Taxus	25	RawIntensity-ye	7.93	27.52	1.79509	1.24218e-09	8.95964e-09	-	-	-	-
Unigene11816_Taxus	15	RawIntensity-ye	4.76	16.51	1.79431	2.77616e-06	1.30307e-05	GO:0009536//plastid	GO:0008685//2-C-methyl-D-erythritol 2,4-cyclodiphosphate synthase activity	GO:0016114//terpenoid biosynthetic process	gi|255086813|ref|XP_002509373.1|/2e-53/2-c-methyl-d-erythritol 2,4-cyclodiphosphate synthase [Micromonas sp. RCC299] >gi|226524651|gb|ACO70631.1| 2-c-methyl-d-erythritol 2,4-cyclodiphosphate synthase [Micromonas sp. RCC299]
Unigene3422_Taxus	39	RawIntensity-ye	12.37	42.87	1.79312	1.23235e-13	1.41799e-12	-	-	-	gi|74602185|sp|Q6BQJ1.1|TVP38_DEBHA/1e-05/RecName: Full=Golgi apparatus membrane protein TVP38 >gi|49655197|emb|CAG87756.1| DEHA2E04840p [Debaryomyces hansenii]
Unigene33185_Taxus	77	RawIntensity-ye	24.42	84.59	1.79242	0	0	-	GO:0004103//choline kinase activity	-	gi|115434930|ref|NP_001042223.1|/1e-17/Os01g0183000 [Oryza sativa (japonica cultivar-group)]
Unigene10852_Taxus	37	RawIntensity-ye	11.73	40.56	1.78985	2.47136e-13	2.69706e-12	-	-	-	gi|6093671|sp|P22195.2|PER1_ARAHY/1e-103/RecName: Full=Cationic peroxidase 1; AltName: Full=PNPC1; Flags: Precursor >gi|1491776|gb|AAB06183.1| cationic peroxidase [Arachis hypogaea]
Unigene27630_Taxus	14	RawIntensity-ye	4.44	15.35	1.78961	6.58856e-06	2.93122e-05	-	-	-	-
Unigene34983_Taxus	18	RawIntensity-ye	5.71	19.7	1.78663	3.19786e-07	1.71429e-06	-	-	-	gi|117168087|gb|ABK32126.1|/9e-06/At1g52565 [Arabidopsis thaliana]
Unigene35079_Taxus	35	RawIntensity-ye	11.1	38.24	1.78452	1.01186e-12	1.0122e-11	-	-	-	gi|115445727|ref|NP_001046643.1|/7e-17/Os02g0307800 [Oryza sativa (japonica cultivar-group)] >gi|113536174|dbj|BAF08557.1| Os02g0307800 [Oryza sativa Japonica Group]
Unigene20480_Taxus	13	RawIntensity-ye	4.12	14.19	1.78416	1.56801e-05	6.48688e-05	-	-	-	gi|159489721|ref|XP_001702845.1|/1e-07/R-SNARE protein, tomsyn-like family [Chlamydomonas reinhardtii] >gi|158271062|gb|EDO96890.1| R-SNARE protein, tomsyn-like family [Chlamydomonas reinhardtii]
Unigene15341_Taxus	186	RawIntensity-ye	58.98	203.07	1.78368	6.0707e-13	6.25348e-12	-	-	-	gi|4836897|gb|AAD30600.1|AC007369_10/1e-33/Hypothetical protein [Arabidopsis thaliana]
Unigene8812_Taxus	37	RawIntensity-ye	11.73	40.27	1.7795	3.3018e-13	3.53686e-12	-	-	-	-
Unigene17493_Taxus	16	RawIntensity-ye	5.07	17.38	1.77737	1.78385e-06	8.6273e-06	-	-	-	gi|8671882|gb|AAF78445.1|AC018748_24/0.0/Contains a weak similarity to disease resistance protein (cf-5) gene from Lycopersicon esculentum gb|AF053993 and contains multiple leucine rich PF|00560 repeats and protein kinase PF|00069 domain. EST gb|T04455 comes from this gene [Arabidopsis thaliana]
Unigene25136_Taxus	97	RawIntensity-ye	30.76	105.44	1.77729	5.75096e-14	7.18211e-13	-	-	-	-
Unigene35087_Taxus	78	RawIntensity-ye	24.73	84.3	1.76927	0	0	-	-	-	-
Unigene34684_Taxus	134	RawIntensity-ye	42.49	144.84	1.76926	0	0	-	-	-	gi|1583514|prf||2120451A/1e-19/ORF YBL0417
Unigene26999_Taxus	33	RawIntensity-ye	10.46	35.63	1.76821	7.50134e-12	6.83515e-11	-	-	-	-
Unigene9712_Taxus	11	RawIntensity-ye	3.49	11.88	1.76724	8.96836e-05	0.000322789	-	-	-	gi|224000635|ref|XP_002289990.1|/1e-09/rRNA methyltransferase [Thalassiosira pseudonana CCMP1335] >gi|220975198|gb|EED93527.1| rRNA methyltransferase [Thalassiosira pseudonana CCMP1335]
Unigene32973_Taxus	188	RawIntensity-ye	59.62	202.78	1.76605	1.89626e-13	2.10649e-12	-	-	-	gi|115489606|ref|NP_001067290.1|/1e-07/Os12g0617900 [Oryza sativa (japonica cultivar-group)] >gi|110832776|sp|Q2QM47.2|BSL2_ORYSJ RecName: Full=Serine/threonine-protein phosphatase BSL2 homolog; AltName: Full=BSU1-like protein 2 homolog >gi|113649797|dbj|BAF30309.1| Os12g0617900 [Oryza sativa Japonica Group]
Unigene34790_Taxus	29	RawIntensity-ye	9.2	31.29	1.766	1.43557e-10	1.13359e-09	-	-	-	gi|117549794|gb|ABK35085.1|/8e-06/EIL1 [Prunus persica]
Unigene34133_Taxus	186	RawIntensity-ye	58.98	200.46	1.76502	6.0707e-13	6.25706e-12	-	-	-	gi|48431269|gb|AAT44124.1|/1e-39/F3H-like protein [Saussurea medusa]
Unigene34366_Taxus	32	RawIntensity-ye	10.15	34.47	1.76386	1.72637e-11	1.51255e-10	-	-	-	gi|224100703|ref|XP_002311981.1|/6e-69/acyl:coa ligase [Populus trichocarpa] >gi|222851801|gb|EEE89348.1| acyl:coa ligase [Populus trichocarpa]
Unigene11392_Taxus	24	RawIntensity-ye	7.61	25.78	1.76028	6.609e-09	4.42963e-08	-	-	-	gi|193848575|gb|ACF22760.1|/3e-49/2-phosphoglycerate kinase [Brachypodium distachyon]
Unigene13404_Taxus	123	RawIntensity-ye	39	132.09	1.75998	0	0	-	-	-	-
Unigene16647_Taxus	34	RawIntensity-ye	10.78	36.5	1.75954	4.8681e-12	4.54862e-11	-	-	-	gi|195614000|gb|ACG28830.1|/1e-21/spotted leaf protein 11 [Zea mays]
Unigene11280_Taxus	17	RawIntensity-ye	5.39	18.25	1.75954	1.14575e-06	5.67703e-06	-	-	-	gi|15232006|ref|NP_187516.1|/2e-62/pentatricopeptide (PPR) repeat-containing protein [Arabidopsis thaliana] >gi|75207468|sp|Q9SS83.1|PP220_ARATH RecName: Full=Pentatricopeptide repeat-containing protein At3g09040, mitochondrial; Flags: Precursor
Unigene18136_Taxus	115	RawIntensity-ye	36.47	123.4	1.75856	0	0	-	-	-	gi|209425375|gb|ACI47063.1|/3e-83/10-deacetylbaccatin III 10-O-acetyltransferase [Aspergillus candidus]
Unigene5586_Taxus	10	RawIntensity-ye	3.17	10.72	1.75775	0.00021575	0.000723428	-	-	-	gi|116000311|emb|CAL49991.1|/1e-07/SRP54_SYNY3 Signal recognition particle protein (ISS) [Ostreococcus tauri]
Unigene17212_Taxus	20	RawIntensity-ye	6.34	21.44	1.75775	1.3254e-07	7.46772e-07	-	-	-	-
Unigene11494_Taxus	30	RawIntensity-ye	9.51	32.15	1.7573	9.28332e-11	7.48824e-10	-	-	-	gi|225463691|ref|XP_002276635.1|/5e-31/PREDICTED: similar to VRP1-1 isoform 2 [Vitis vinifera]
Unigene16639_Taxus	13	RawIntensity-ye	4.12	13.9	1.75437	2.39056e-05	9.57714e-05	-	-	-	gi|224007487|ref|XP_002292703.1|/1e-22/dolichol kinase [Thalassiosira pseudonana CCMP1335] >gi|220971565|gb|EED89899.1| dolichol kinase [Thalassiosira pseudonana CCMP1335]
Unigene28153_Taxus	13	RawIntensity-ye	4.12	13.9	1.75437	2.39056e-05	9.57501e-05	-	-	-	-
Unigene13553_Taxus	16	RawIntensity-ye	5.07	17.09	1.75309	2.71022e-06	1.27578e-05	-	-	-	-
Unigene4016_Taxus	74	RawIntensity-ye	23.47	78.79	1.74719	0	0	-	-	-	gi|115489298|ref|NP_001067136.1|/2e-17/Os12g0581700 [Oryza sativa (japonica cultivar-group)] >gi|113649643|dbj|BAF30155.1| Os12g0581700 [Oryza sativa Japonica Group]
Unigene20476_Taxus	92	RawIntensity-ye	29.17	97.91	1.74697	5.9952e-15	8.22329e-14	-	-	-	gi|28950929|gb|AAO63388.1|/7e-07/At5g19850 [Arabidopsis thaliana]
Unigene34653_Taxus	42	RawIntensity-ye	13.32	44.61	1.74377	1.16573e-13	1.35696e-12	-	-	-	gi|115483154|ref|NP_001065170.1|/3e-06/Os10g0536500 [Oryza sativa (japonica cultivar-group)] >gi|31433274|gb|AAP54812.1| expressed protein [Oryza sativa (japonica cultivar-group)] >gi|113639779|dbj|BAF27084.1| Os10g0536500 [Oryza sativa Japonica Group]
Unigene17277_Taxus	18	RawIntensity-ye	5.71	19.12	1.74352	7.35666e-07	3.75469e-06	-	-	-	-
Unigene20507_Taxus	15	RawIntensity-ye	4.76	15.93	1.74271	6.424e-06	2.86225e-05	-	-	-	gi|115452417|ref|NP_001049809.1|/2e-18/Os03g0293100 [Oryza sativa (japonica cultivar-group)] >gi|113548280|dbj|BAF11723.1| Os03g0293100 [Oryza sativa Japonica Group]
Unigene8820_Taxus	12	RawIntensity-ye	3.81	12.75	1.74263	5.70984e-05	0.000214474	-	-	-	gi|115478775|ref|NP_001062981.1|/1e-115/Os09g0361200 [Oryza sativa (japonica cultivar-group)]
Unigene3918_Taxus	20	RawIntensity-ye	6.34	21.15	1.7381	2.00578e-07	1.10217e-06	-	-	-	-
Unigene18430_Taxus	59	RawIntensity-ye	18.71	62.28	1.73496	3.10862e-15	4.37737e-14	-	-	-	gi|15225134|ref|NP_180734.1|/4e-13/UGT74D1 (UDP-glucosyl transferase 74D1); UDP-glycosyltransferase/ abscisic acid glucosyltransferase/ transferase, transferring glycosyl groups / transferase, transferring hexosyl groups [Arabidopsis thaliana] >gi|21928141|gb|AAM78098.1| At2g31750/F20M17.21 [Arabidopsis thaliana] >gi|23507803|gb|AAN38705.1| At2g31750/F20M17.21 [Arabidopsis thaliana] >gi|76152082|…
Unigene24224_Taxus	146	RawIntensity-ye	46.3	154.11	1.73488	2.22044e-15	3.14886e-14	-	-	-	-
Unigene9692_Taxus	14	RawIntensity-ye	4.44	14.77	1.73404	1.52609e-05	6.3149e-05	-	-	-	gi|220959988|gb|ABR15367.3|/9e-22/GTP cyclohydrolase II [Eremothecium ashbyi]
Unigene15252_Taxus	11	RawIntensity-ye	3.49	11.59	1.73158	0.000136847	0.000470969	-	-	-	gi|19115805|ref|NP_594893.1|/2e-06/pinin homologue [Schizosaccharomyces pombe] >gi|1723576|sp|Q10492.1|YDG2_SCHPO RecName: Full=Uncharacterized protein C26F1.02 >gi|1314171|emb|CAA97359.1| pinin homologue [Schizosaccharomyces pombe]
Unigene14085_Taxus	41	RawIntensity-ye	13	43.16	1.73118	2.26042e-13	2.48343e-12	GO:0009536//plastid;GO:0005739//mitochondrion	GO:0046872//metal ion binding;GO:0003824//catalytic activity	GO:0006508//proteolysis	gi|224009598|ref|XP_002293757.1|/2e-32/stromal processing peptidase [Thalassiosira pseudonana CCMP1335] >gi|220970429|gb|EED88766.1| stromal processing peptidase [Thalassiosira pseudonana CCMP1335]
Unigene23210_Taxus	150	RawIntensity-ye	47.57	157.88	1.7307	0	0	-	-	-	-
Unigene20486_Taxus	111	RawIntensity-ye	35.2	116.74	1.72965	0	0	GO:0005886//plasma membrane	-	-	gi|2564066|dbj|BAA22940.1|/3e-65/LEDI-3 protein [Lithospermum erythrorhizon]
Unigene16565_Taxus	69	RawIntensity-ye	21.88	72.42	1.72678	0	0	-	-	-	-
Unigene19772_Taxus	37	RawIntensity-ye	11.73	38.82	1.7266	2.0115e-12	1.94723e-11	-	-	-	gi|255679505|dbj|BAF26809.2|/6e-20/Os10g0485300 [Oryza sativa Japonica Group]
Unigene12226_Taxus	45	RawIntensity-ye	14.27	47.22	1.72641	6.88338e-15	9.34893e-14	-	-	-	gi|49643429|emb|CAG99381.1|/5e-06/KLLA0E07657p [Kluyveromyces lactis]
Unigene27367_Taxus	13	RawIntensity-ye	4.12	13.62	1.72501	3.63452e-05	0.000141085	-	-	-	-
Unigene15753_Taxus	13	RawIntensity-ye	4.12	13.62	1.72501	3.63452e-05	0.000141054	-	-	-	-
Unigene12753_Taxus	59	RawIntensity-ye	18.71	61.7	1.72146	3.10862e-15	4.37394e-14	-	-	-	gi|254574316|ref|XP_002494267.1|/1e-14/Ran GTPase binding protein [Pichia pastoris GS115] >gi|238034066|emb|CAY72088.1| Ran GTPase binding protein [Pichia pastoris GS115]
Unigene23717_Taxus	328	RawIntensity-ye	104.01	342.69	1.72018	1.76748e-13	1.97317e-12	-	-	-	gi|145323706|ref|NP_001077442.1|/3e-11/short-chain dehydrogenase/reductase (SDR) family protein [Arabidopsis thaliana]
Unigene15619_Taxus	132	RawIntensity-ye	41.86	137.89	1.71987	1.41887e-13	1.61403e-12	-	-	-	gi|195645460|gb|ACG42198.1|/9e-30/cytoplasmic membrane protein [Zea mays]
Unigene21107_Taxus	104	RawIntensity-ye	32.98	108.34	1.7159	0	0	-	-	-	gi|270258534|emb|CBI40568.1|/2e-08/unnamed protein product [Vitis vinifera]
Unigene35343_Taxus	222	RawIntensity-ye	70.4	230.88	1.7135	0	0	-	-	-	gi|73921149|sp|Q9LV66.1|Y5848_ARATH/3e-18/RecName: Full=Uncharacterized protein At5g48480
Unigene33756_Taxus	151	RawIntensity-ye	47.88	157.01	1.71336	0	0	-	-	-	gi|255932297|ref|XP_002557705.1|/1e-17/Pc12g08750 [Penicillium chrysogenum Wisconsin 54-1255] >gi|211582324|emb|CAP80502.1| Pc12g08750 [Penicillium chrysogenum Wisconsin 54-1255]
Unigene36251_Taxus	34	RawIntensity-ye	10.78	35.34	1.71294	2.44554e-11	2.08776e-10	-	-	-	gi|222424455|dbj|BAH20183.1|/1e-167/AT4G34860 [Arabidopsis thaliana]
Unigene18319_Taxus	29	RawIntensity-ye	9.2	30.13	1.71149	7.3859e-10	5.47433e-09	-	-	-	gi|116781209|gb|ABK22005.1|/8e-32/unknown [Picea sitchensis]
Unigene11777_Taxus	24	RawIntensity-ye	7.61	24.91	1.71076	2.2717e-08	1.42098e-07	-	-	-	gi|1170507|sp|P41380.1|IF4A3_NICPL/3e-06/RecName: Full=Eukaryotic initiation factor 4A-3; Short=eIF-4A-3; AltName: Full=ATP-dependent RNA helicase eIF4A-3 >gi|19699|emb|CAA43514.1| nicotiana eukaryotic translation initiation factor 4A [Nicotiana plumbaginifolia]
Unigene28715_Taxus	84	RawIntensity-ye	26.64	87.19	1.71057	0	0	-	-	-	-
Unigene31314_Taxus	12	RawIntensity-ye	3.81	12.46	1.70944	8.68056e-05	0.000313245	-	-	-	-
Unigene23525_Taxus	19	RawIntensity-ye	6.03	19.7	1.70797	7.13348e-07	3.64596e-06	-	-	-	-
Unigene20099_Taxus	54	RawIntensity-ye	17.12	55.91	1.70742	1.70974e-14	2.25081e-13	-	GO:0009055//electron carrier activity;GO:0020037//heme binding;GO:0050597;GO:0050598	GO:0042617;GO:0055114//oxidation reduction	gi|224115696|ref|XP_002317099.1|/1e-49/cytochrome P450 [Populus trichocarpa] >gi|222860164|gb|EEE97711.1| cytochrome P450 [Populus trichocarpa]
Unigene17322_Taxus	21	RawIntensity-ye	6.66	21.73	1.70609	1.9447e-07	1.07024e-06	-	-	-	gi|189189876|ref|XP_001931277.1|/8e-19/agmatinase, mitochondrial precursor [Pyrenophora tritici-repentis Pt-1C-BFP] >gi|187972883|gb|EDU40382.1| agmatinase, mitochondrial precursor [Pyrenophora tritici-repentis Pt-1C-BFP]
Unigene35671_Taxus	106	RawIntensity-ye	33.61	109.5	1.70397	0	0	-	-	-	gi|226463274|gb|EEH60552.1|/4e-49/iron-sulfur cofactor synthesis protein [Micromonas pusilla CCMP1545]
Unigene35679_Taxus	16	RawIntensity-ye	5.07	16.51	1.70328	6.21626e-06	2.77863e-05	-	-	-	gi|34809902|pdb|1IYN|A/1e-138/Chain A, Crystal Structure Of Chloroplastic Ascorbate Peroxidase From Tobacco Plants And Structural Insights For Its Instability >gi|22535513|dbj|BAC10691.1| stromal ascorbate peroxidase [Nicotiana tabacum]
Unigene32690_Taxus	57	RawIntensity-ye	18.08	58.81	1.70167	2.73114e-14	3.51822e-13	-	-	-	-
Unigene11219_Taxus	201	RawIntensity-ye	63.74	206.54	1.69615	0	0	-	-	-	gi|22329792|ref|NP_173937.2|/5e-06/esterase-related [Arabidopsis thaliana]
Unigene29344_Taxus	22	RawIntensity-ye	6.98	22.6	1.69502	1.24769e-07	7.06082e-07	-	-	-	-
Unigene12208_Taxus	22	RawIntensity-ye	6.98	22.6	1.69502	1.24769e-07	7.0586e-07	-	-	-	gi|226495369|ref|NP_001147768.1|/6e-06/LOC100281378 [Zea mays] >gi|195613630|gb|ACG28645.1| epoxide hydrolase 2 [Zea mays]
Unigene19281_Taxus	124	RawIntensity-ye	39.32	127.17	1.69342	1.48992e-13	1.68104e-12	-	-	-	gi|70985890|ref|XP_748450.1|/1e-18/AMID-like mitochondrial oxidoreductase [Aspergillus fumigatus Af293]
Unigene35858_Taxus	56	RawIntensity-ye	17.76	57.36	1.69141	0	0	-	-	-	gi|213403952|ref|XP_002172748.1|/2e-06/small glutamine-rich tetratricopeptide repeat-containing protein B [Schizosaccharomyces japonicus yFS275] >gi|212000795|gb|EEB06455.1| small glutamine-rich tetratricopeptide repeat-containing protein B [Schizosaccharomyces japonicus yFS275]
Unigene12880_Taxus	64	RawIntensity-ye	20.29	65.47	1.69007	0	0	-	-	-	gi|194477092|ref|YP_002049271.1|/9e-10/possible ferredoxin (2Fe-2S) [Paulinella chromatophora] >gi|171192099|gb|ACB43061.1| possible ferredoxin (2Fe-2S) [Paulinella chromatophora]
Unigene13357_Taxus	15	RawIntensity-ye	4.76	15.35	1.68921	1.47263e-05	6.10774e-05	-	-	-	gi|255673226|dbj|BAH91067.1|/2e-06/Os01g0363500 [Oryza sativa Japonica Group]
Unigene1537_Taxus	21	RawIntensity-ye	6.66	21.44	1.68671	2.92762e-07	1.57317e-06	-	-	-	gi|89355891|gb|ABD72269.1|/1e-05/plastid fibrillin 3 [Coffea canephora]
Unigene23347_Taxus	50	RawIntensity-ye	15.86	50.98	1.68454	1.11022e-14	1.48547e-13	-	-	-	gi|9294157|dbj|BAB02059.1|/3e-12/blue copper-binding protein-like [Arabidopsis thaliana]
Unigene12399_Taxus	31	RawIntensity-ye	9.83	31.58	1.68375	4.60688e-10	3.48782e-09	-	-	-	gi|213402163|ref|XP_002171854.1|/6e-74/splicing factor 3A subunit 3 [Schizosaccharomyces japonicus yFS275] >gi|211999901|gb|EEB05561.1| splicing factor 3A subunit 3 [Schizosaccharomyces japonicus yFS275]
Unigene26634_Taxus	211	RawIntensity-ye	66.91	214.65	1.68169	2.28706e-13	2.5081e-12	-	-	-	-
Unigene18631_Taxus	235	RawIntensity-ye	74.52	238.99	1.68125	4.15668e-13	4.36937e-12	-	-	-	gi|19114252|ref|NP_593340.1|/7e-30/calmodulin Cam1 [Schizosaccharomyces pombe 972h-] >gi|115523|sp|P05933.1|CALM_SCHPO RecName: Full=Calmodulin; Short=CaM >gi|173357|gb|AAA35291.1| calmodulin [Schizosaccharomyces pombe] >gi|2104430|emb|CAB08742.1| calmodulin Cam1 [Schizosaccharomyces pombe]
Unigene21061_Taxus	100	RawIntensity-ye	31.71	101.68	1.68103	3.84138e-14	4.8717e-13	-	-	-	gi|255942793|ref|XP_002562165.1|/6e-07/Pc18g03250 [Penicillium chrysogenum Wisconsin 54-1255] >gi|211586898|emb|CAP94549.1| Pc18g03250 [Penicillium chrysogenum Wisconsin 54-1255]
Unigene11720_Taxus	30	RawIntensity-ye	9.51	30.42	1.6775	1.07223e-09	7.77116e-09	-	-	-	-
Unigene3269_Taxus	30	RawIntensity-ye	9.51	30.42	1.6775	1.07223e-09	7.76803e-09	-	-	-	gi|42565967|ref|NP_191175.2|/3e-07/bile acid:sodium symporter [Arabidopsis thaliana]
Unigene4440_Taxus	30	RawIntensity-ye	9.51	30.42	1.6775	1.07223e-09	7.7649e-09	-	-	-	gi|195536980|dbj|BAG68210.1|/8e-15/lectin receptor kinase-like protein [Nicotiana benthamiana]
Unigene30624_Taxus	90	RawIntensity-ye	28.54	91.25	1.67684	0	0	-	-	-	-
Unigene33645_Taxus	14	RawIntensity-ye	4.44	14.19	1.67624	3.49546e-05	0.000135921	-	-	-	gi|116793257|gb|ABK26675.1|/1e-17/unknown [Picea sitchensis]
Unigene20250_Taxus	14	RawIntensity-ye	4.44	14.19	1.67624	3.49546e-05	0.000135892	-	GO:0004871//signal transducer activity;GO:0005515//protein binding;GO:0005525//GTP binding	GO:0007186//G-protein coupled receptor protein signaling pathway;GO:0006471//protein amino acid ADP-ribosylation	gi|18369796|dbj|BAB84093.1|/1e-57/heterotrimeric GTP binding protein alpha subunit [Nicotiana tabacum]
Unigene13966_Taxus	12	RawIntensity-ye	3.81	12.17	1.67547	0.000131469	0.00045683	-	-	-	gi|227206400|dbj|BAH57255.1|/1e-10/AT1G73350 [Arabidopsis thaliana]
Unigene32584_Taxus	69	RawIntensity-ye	21.88	69.81	1.67382	0	0	-	-	-	gi|255552069|ref|XP_002517079.1|/3e-07/calmodulin binding protein, putative [Ricinus communis] >gi|223543714|gb|EEF45242.1| calmodulin binding protein, putative [Ricinus communis]
Unigene26011_Taxus	33	RawIntensity-ye	10.46	33.31	1.67107	1.91082e-10	1.49185e-09	-	-	-	gi|116056401|emb|CAL52690.1|/4e-30/U2 snRNP auxiliary factor, large subunit (ISS) [Ostreococcus tauri]
Unigene21690_Taxus	105	RawIntensity-ye	33.3	106.02	1.67074	0	0	-	-	-	-
Unigene25204_Taxus	129	RawIntensity-ye	40.91	130.07	1.66876	0	0	-	-	-	-
Unigene21043_Taxus	92	RawIntensity-ye	29.17	92.7	1.66808	5.9952e-15	8.18586e-14	-	-	-	gi|14285705|sp|O98449.1|RK19_THAWE/3e-15/RecName: Full=50S ribosomal protein L19, chloroplastic >gi|3986414|gb|AAD12751.1| ribosomal protein L19 [Thalassiosira weissflogii]
Unigene22687_Taxus	38	RawIntensity-ye	12.05	38.24	1.66605	9.54748e-12	8.621e-11	-	-	-	-
Unigene15543_Taxus	57	RawIntensity-ye	18.08	57.36	1.66565	2.73114e-14	3.53086e-13	-	-	-	gi|115458662|ref|NP_001052931.1|/1e-130/Os04g0449400 [Oryza sativa (japonica cultivar-group)]
Unigene35165_Taxus	184	RawIntensity-ye	58.35	185.11	1.66558	3.07754e-13	3.30845e-12	-	-	-	gi|25453062|sp|Q9FS88.1|IVD1_SOLTU/4e-31/RecName: Full=Isovaleryl-CoA dehydrogenase 1, mitochondrial; Short=IVD 1; Flags: Precursor >gi|10129808|emb|CAC08233.1| isovaleryl-CoA dehydrogenase [Solanum tuberosum]
Unigene10112_Taxus	19	RawIntensity-ye	6.03	19.12	1.66485	1.61617e-06	7.84374e-06	-	-	-	gi|15236287|ref|NP_192243.1|/1e-108/glycosyltransferase family 14 protein / core-2/I-branching enzyme family protein [Arabidopsis thaliana]
Unigene959_Taxus	17	RawIntensity-ye	5.39	17.09	1.6648	5.97036e-06	2.67204e-05	GO:0009570//chloroplast stroma;GO:0048046//apoplast	GO:0030170//pyridoxal phosphate binding;GO:0004069//L-aspartate:2-oxoglutarate aminotransferase activity	GO:0046686//response to cadmium ion;GO:0006520//cellular amino acid metabolic process;GO:0009058//biosynthetic process	gi|159483981|ref|XP_001700039.1|/1e-132/aspartate aminotransferase [Chlamydomonas reinhardtii] >gi|158281981|gb|EDP07735.1| aspartate aminotransferase [Chlamydomonas reinhardtii]
Unigene27096_Taxus	17	RawIntensity-ye	5.39	17.09	1.6648	5.97036e-06	2.67137e-05	-	-	-	-
Unigene18978_Taxus	34	RawIntensity-ye	10.78	34.18	1.6648	1.23034e-10	9.78833e-10	-	-	-	-
Unigene33323_Taxus	75	RawIntensity-ye	23.78	75.32	1.66328	0	0	-	GO:0046872//metal ion binding	-	gi|226504226|ref|NP_001150850.1|/8e-13/RING-H2 finger protein ATL2B [Zea mays] >gi|195642368|gb|ACG40652.1| RING-H2 finger protein ATL2B [Zea mays]
Unigene23664_Taxus	15	RawIntensity-ye	4.76	15.06	1.66169	2.2193e-05	8.93879e-05	-	-	-	gi|30687603|ref|NP_194476.2|/4e-14/CBS domain-containing protein [Arabidopsis thaliana] >gi|111074322|gb|ABH04534.1| At4g27460 [Arabidopsis thaliana]
Unigene35994_Taxus	80	RawIntensity-ye	25.37	80.24	1.6612	0	0	-	-	-	gi|2493038|sp|Q40610.1|ATPD_OCHNE/4e-20/RecName: Full=ATP synthase subunit delta, chloroplastic; AltName: Full=ATP synthase F(1) sector subunit delta; AltName: Full=F-type ATPase subunit delta >gi|1430914|emb|CAA67539.1| subunit delta of ATPase [Ochrosphaera neapolitana]
Unigene10756_Taxus	46	RawIntensity-ye	14.59	46.06	1.65853	1.45883e-13	1.64907e-12	-	-	-	-
Unigene653_Taxus	162	RawIntensity-ye	51.37	161.64	1.65379	0	0	-	-	-	gi|116060871|emb|CAL57349.1|/7e-64/Predicted K+/H+-antiporter (ISS) [Ostreococcus tauri]
Unigene19391_Taxus	16	RawIntensity-ye	5.07	15.93	1.65169	1.40962e-05	5.9008e-05	-	-	-	gi|115464013|ref|NP_001055606.1|/6e-06/Os05g0427200 [Oryza sativa (japonica cultivar-group)] >gi|113579157|dbj|BAF17520.1| Os05g0427200 [Oryza sativa Japonica Group]
Unigene20104_Taxus	91	RawIntensity-ye	28.86	90.67	1.65155	0	0	GO:0009536//plastid	-	-	gi|132961|sp|P27684.1|PSRP5_SPIOL/3e-06/RecName: Full=50S ribosomal protein 5 alpha, chloroplastic; AltName: Full=Plastid-specific 50S ribosomal protein 5 alpha; Short=PSRP-5; AltName: Full=50S ribosomal protein L40; AltName: Full=CL40; Contains: RecName: Full=50S ribosomal protein 5 beta, chloroplastic; Contains: RecName: Full=50S ribosomal protein 5 gamma, chloroplastic; Flags: Precursor >gi|17…
Unigene31183_Taxus	55	RawIntensity-ye	17.44	54.75	1.65046	0	0	-	-	-	gi|261190885|ref|XP_002621851.1|/2e-07/cytokinesis protein sepA [Ajellomyces dermatitidis SLH14081] >gi|239590895|gb|EEQ73476.1| cytokinesis protein sepA [Ajellomyces dermatitidis SLH14081]
Unigene33160_Taxus	181	RawIntensity-ye	57.4	180.18	1.65032	1.33449e-13	1.52673e-12	-	-	-	gi|15232407|ref|NP_190972.1|/1e-31/photoassimilate-responsive protein-related [Arabidopsis thaliana] >gi|7630024|emb|CAB88366.1| photoassimilate-responsive protein PAR-1b-like protein [Arabidopsis thaliana] >gi|18252939|gb|AAL62396.1| photoassimilate-responsive protein PAR-1b -like protein [Arabidopsis thaliana] >gi|21389647|gb|AAM48022.1| photoassimilate-responsive protein PAR-1b-like protein [A…
Unigene32750_Taxus	410	RawIntensity-ye	130.01	407.29	1.64743	1.21081e-12	1.19988e-11	-	-	-	gi|261195895|ref|XP_002624351.1|/4e-44/formamidase [Ajellomyces dermatitidis SLH14081] >gi|239587484|gb|EEQ70127.1| formamidase [Ajellomyces dermatitidis SLH14081] >gi|239614436|gb|EEQ91423.1| formamidase [Ajellomyces dermatitidis ER-3]
Unigene26487_Taxus	21	RawIntensity-ye	6.66	20.86	1.64715	6.58718e-07	3.38791e-06	-	-	-	-
Unigene9830_Taxus	56	RawIntensity-ye	17.76	55.62	1.64697	0	0	-	-	-	gi|115459732|ref|NP_001053466.1|/1e-117/Os04g0545200 [Oryza sativa (japonica cultivar-group)] >gi|70663962|emb|CAD41460.3| OSJNBa0079A21.4 [Oryza sativa (japonica cultivar-group)] >gi|113565037|dbj|BAF15380.1| Os04g0545200 [Oryza sativa Japonica Group]
Unigene23099_Taxus	14	RawIntensity-ye	4.44	13.9	1.64645	5.26256e-05	0.000198252	-	-	-	-
Unigene23452_Taxus	274	RawIntensity-ye	86.89	271.43	1.64332	9.54792e-14	1.13117e-12	-	-	-	-
Unigene4070_Taxus	127	RawIntensity-ye	40.27	125.72	1.64244	1.22569e-13	1.41122e-12	-	-	-	gi|255076279|ref|XP_002501814.1|/4e-36/carbohydrate-binding module family 45 protein [Micromonas sp. RCC299] >gi|226517078|gb|ACO63072.1| carbohydrate-binding module family 45 protein [Micromonas sp. RCC299]
Unigene2579_Taxus	43	RawIntensity-ye	13.64	42.58	1.64233	1.15663e-12	1.15062e-11	-	-	-	gi|115466012|ref|NP_001056605.1|/5e-81/Os06g0114600 [Oryza sativa (japonica cultivar-group)] >gi|113594645|dbj|BAF18519.1| Os06g0114600 [Oryza sativa Japonica Group]
Unigene13982_Taxus	24	RawIntensity-ye	7.61	23.75	1.64196	1.15049e-07	6.54161e-07	-	-	-	gi|6323393|ref|NP_013465.1|/7e-43/Dcr2p [Saccharomyces cerevisiae] >gi|68566300|sp|Q05924.1|DCR2_YEAST RecName: Full=Phosphatase DCR2; AltName: Full=Dosage-dependent cell cycle regulator 2 >gi|609417|gb|AAB67574.1| Ylr361cp [Saccharomyces cerevisiae] >gi|285813768|tpg|DAA09664.1| TPA: Dcr2p [Saccharomyces cerevisiae]
Unigene20503_Taxus	111	RawIntensity-ye	35.2	109.79	1.6411	0	0	-	-	-	gi|115384488|ref|XP_001208791.1|/8e-28/nucleolar GTP-binding protein 1 [Aspergillus terreus NIH2624] >gi|114196483|gb|EAU38183.1| nucleolar GTP-binding protein 1 [Aspergillus terreus NIH2624]
Unigene17247_Taxus	109	RawIntensity-ye	34.56	107.76	1.64065	0	0	-	-	-	gi|92019685|dbj|BAE93235.1|/0.0/potassium transporter [Phragmites australis]
Unigene15934_Taxus	34	RawIntensity-ye	10.78	33.6	1.6401	2.73738e-10	2.11153e-09	-	-	-	gi|195609520|gb|ACG26590.1|/7e-06/Grx_S16 - glutaredoxin subgroup II [Zea mays]
Unigene7893_Taxus	17	RawIntensity-ye	5.39	16.8	1.6401	8.95716e-06	3.85906e-05	-	-	-	gi|108951289|gb|ABG25038.1|/3e-08/nitric oxide synthase [Arabidopsis thaliana]
Unigene1171_Taxus	27	RawIntensity-ye	8.56	26.65	1.63845	2.02246e-08	1.27348e-07	-	-	-	gi|115469104|ref|NP_001058151.1|/7e-26/Os06g0638200 [Oryza sativa (japonica cultivar-group)] >gi|113596191|dbj|BAF20065.1| Os06g0638200 [Oryza sativa Japonica Group]
Unigene35091_Taxus	22	RawIntensity-ye	6.98	21.73	1.63839	4.20634e-07	2.20306e-06	-	-	-	gi|226508268|ref|NP_001148751.1|/1e-07/16.9 kDa class I heat shock protein 1 [Zea mays] >gi|195621878|gb|ACG32769.1| 16.9 kDa class I heat shock protein 1 [Zea mays]
Unigene29763_Taxus	306	RawIntensity-ye	97.03	301.85	1.63733	0	0	GO:0009507//chloroplast	GO:0009055//electron carrier activity;GO:0005515//protein binding;GO:0015035//protein disulfide oxidoreductase activity	GO:0045454//cell redox homeostasis;GO:0006662//glycerol ether metabolic process;GO:0006810//transport;GO:0022900//electron transport chain	gi|6539614|gb|AAF15951.1|AF095752_1/2e-32/thioredoxin m4 [Arabidopsis thaliana]
Unigene22081_Taxus	89	RawIntensity-ye	28.22	87.77	1.63701	0	0	-	-	-	-
Unigene2532_Taxus	35	RawIntensity-ye	11.1	34.47	1.63478	1.7591e-10	1.37818e-09	-	-	-	-
Unigene4917_Taxus	23	RawIntensity-ye	7.29	22.6	1.63233	2.68646e-07	1.45356e-06	-	GO:0003824//catalytic activity	GO:0008610//lipid biosynthetic process	gi|115467092|ref|NP_001057145.1|/6e-44/Os06g0216300 [Oryza sativa (japonica cultivar-group)] >gi|60687503|pir||JC8028 cis-12-oxo-phytodienoic acid-reductase 1 - rice >gi|23495288|dbj|BAC20139.1| 12-oxophytodienoic acid reductase [Oryza sativa] >gi|30140333|emb|CAD89604.1| oxo-phytodienoic acid reductase [Oryza sativa (japonica cultivar-group)] >gi|49532745|dbj|BAD26703.1| 12-oxo-phytodienoic acid…
Unigene11101_Taxus	77	RawIntensity-ye	24.42	75.61	1.63051	0	0	-	-	-	-
Unigene13348_Taxus	26	RawIntensity-ye	8.24	25.49	1.62922	4.70852e-08	2.82826e-07	-	-	-	-
Unigene17015_Taxus	166	RawIntensity-ye	52.64	162.8	1.62887	1.75637e-13	1.96199e-12	-	-	-	gi|238844331|gb|EEQ33993.1|/6e-71/ATP-dependent Clp protease ATP-binding subunit clpX [Microsporum canis CBS 113480]
Unigene22467_Taxus	70	RawIntensity-ye	22.2	68.65	1.6287	0	0	-	-	-	-
Unigene6742_Taxus	21	RawIntensity-ye	6.66	20.57	1.62695	9.84184e-07	4.93628e-06	-	-	-	gi|28950733|gb|AAO63290.1|/2e-07/At5g57910 [Arabidopsis thaliana]
Unigene35699_Taxus	666	RawIntensity-ye	211.19	651.2	1.62456	0	0	-	-	-	gi|125661837|gb|ABN49927.1|/2e-51/hemoglobin [Myrica gale]
Unigene20175_Taxus	72	RawIntensity-ye	22.83	70.39	1.62444	0	0	-	-	-	gi|213408343|ref|XP_002174942.1|/7e-42/ribose-phosphate pyrophosphokinase [Schizosaccharomyces japonicus yFS275] >gi|212002989|gb|EEB08649.1| ribose-phosphate pyrophosphokinase [Schizosaccharomyces japonicus yFS275]
Unigene3450_Taxus	27	RawIntensity-ye	8.56	26.36	1.62267	3.01268e-08	1.85608e-07	-	-	-	gi|269101016|ref|YP_003289164.1|/1e-16/Photosystem II reaction center protein W [Ectocarpus siliculosus] >gi|266631524|emb|CAV31195.1| Photosystem II reaction center protein W [Ectocarpus siliculosus] >gi|270118654|emb|CAT18706.1| Photosystem II reaction center protein W [Ectocarpus siliculosus]
Unigene16417_Taxus	27	RawIntensity-ye	8.56	26.36	1.62267	3.01268e-08	1.85545e-07	GO:0005737//cytoplasm	GO:0005506//iron ion binding;GO:0050113//inositol oxygenase activity	GO:0019310//inositol catabolic process	gi|255715027|ref|XP_002553795.1|/1e-18/KLTH0E07260p [Lachancea thermotolerans] >gi|238935177|emb|CAR23358.1| KLTH0E07260p [Lachancea thermotolerans]
Unigene11092_Taxus	38	RawIntensity-ye	12.05	37.08	1.62161	4.6698e-11	3.88344e-10	-	GO:0005488//binding;GO:0016491//oxidoreductase activity	GO:0008152//metabolic process	gi|15233455|ref|NP_194641.1|/1e-39/6-phosphogluconate dehydrogenase NAD-binding domain-containing protein [Arabidopsis thaliana]
Unigene24817_Taxus	19	RawIntensity-ye	6.03	18.54	1.62041	3.62118e-06	1.66923e-05	-	-	-	gi|159485524|ref|XP_001700794.1|/1e-08/NO synthase-like protein [Chlamydomonas reinhardtii] >gi|158281293|gb|EDP07048.1| NO synthase-like protein [Chlamydomonas reinhardtii]
Unigene16931_Taxus	39	RawIntensity-ye	12.37	37.95	1.61725	3.00488e-11	2.55195e-10	-	-	-	gi|259482843|tpe|CBF77709.1|/6e-09/TPA: dDENN domain protein (AFU_orthologue; AFUA_4G06480) [Aspergillus nidulans FGSC A4]
Unigene28538_Taxus	14	RawIntensity-ye	4.44	13.62	1.6171	7.89252e-05	0.000286012	-	-	-	-
Unigene15430_Taxus	20	RawIntensity-ye	6.34	19.41	1.61425	2.30386e-06	1.09307e-05	-	-	-	-
Unigene35995_Taxus	77	RawIntensity-ye	24.42	74.74	1.61382	0	0	-	-	-	gi|115452325|ref|NP_001049763.1|/6e-20/Os03g0284600 [Oryza sativa (japonica cultivar-group)] >gi|113548234|dbj|BAF11677.1| Os03g0284600 [Oryza sativa Japonica Group]
Unigene30712_Taxus	72	RawIntensity-ye	22.83	69.81	1.6125	0	0	-	-	-	gi|159464729|ref|XP_001690594.1|/5e-06/deoxyhypusine hydroxylase [Chlamydomonas reinhardtii] >gi|158280094|gb|EDP05853.1| deoxyhypusine hydroxylase [Chlamydomonas reinhardtii]
Unigene2737_Taxus	203	RawIntensity-ye	64.37	196.69	1.61146	1.87184e-13	2.08579e-12	-	-	-	gi|18376030|emb|CAB91764.2|/4e-89/related to pyruvate dehydrogenase kinase isoform 2, mitochondrial [Neurospora crassa]
Unigene21245_Taxus	67	RawIntensity-ye	21.25	64.89	1.61053	0	0	-	-	-	gi|73697834|gb|AAZ81521.1|/1e-152/auxin response factor 1 [Gossypium barbadense]
Unigene35685_Taxus	47	RawIntensity-ye	14.9	45.48	1.60992	3.59934e-13	3.81695e-12	-	-	-	gi|262411024|gb|ACY66878.1|/1e-71/P30Sh115J16 [Saccharum hybrid cultivar R570]
Unigene13959_Taxus	47	RawIntensity-ye	14.9	45.48	1.60992	3.59934e-13	3.81471e-12	GO:0016023//cytoplasmic membrane-bounded vesicle	GO:0003677//DNA binding	-	gi|6624612|emb|CAB63800.1|/4e-59/heat shock factor 2 [Arabidopsis thaliana]
Unigene22738_Taxus	170	RawIntensity-ye	53.91	164.25	1.60727	3.37952e-13	3.59656e-12	-	-	-	-
Unigene35816_Taxus	30	RawIntensity-ye	9.51	28.97	1.60704	7.89684e-09	5.24978e-08	-	-	-	gi|226500602|ref|NP_001148883.1|/1e-21/fiber protein Fb2 [Zea mays] >gi|195622908|gb|ACG33284.1| fiber protein Fb2 [Zea mays]
Unigene13683_Taxus	18	RawIntensity-ye	5.71	17.38	1.60587	8.49872e-06	3.67563e-05	-	-	-	gi|31711716|gb|AAP68214.1|/2e-79/At4g24530 [Arabidopsis thaliana] >gi|110743919|dbj|BAE99793.1| PsRT17-1 like protein [Arabidopsis thaliana]
Unigene18071_Taxus	15	RawIntensity-ye	4.76	14.48	1.60503	4.98672e-05	0.000189048	-	-	-	-
Unigene18266_Taxus	12	RawIntensity-ye	3.81	11.59	1.60502	0.000297732	0.000966099	-	-	-	-
Unigene11112_Taxus	34	RawIntensity-ye	10.78	32.73	1.60226	8.96754e-10	6.59501e-09	-	-	-	gi|115443799|ref|NP_001045679.1|/1e-16/Os02g0116500 [Oryza sativa (japonica cultivar-group)] >gi|3885880|gb|AAC78100.1| protochlorophyllide reductase homolog [Oryza sativa Japonica Group] >gi|113535210|dbj|BAF07593.1| Os02g0116500 [Oryza sativa Japonica Group]
Unigene34390_Taxus	177	RawIntensity-ye	56.13	170.33	1.60149	0	0	-	-	-	gi|15227397|ref|NP_181694.1|/3e-07/TFIIB (TRANSCRIPTION FACTOR II B); RNA polymerase II transcription factor/ protein binding / transcription regulator/ translation initiation factor/ zinc ion binding [Arabidopsis thaliana] >gi|1351221|sp|P48512.1|TF2B1_ARATH RecName: Full=Transcription initiation factor IIB-1; AltName: Full=General transcription factor TFIIB-1; Short=AtTFIIB1 >gi|945085|gb|AAB09…
Unigene7784_Taxus	28	RawIntensity-ye	8.88	26.94	1.60112	2.86218e-08	1.76699e-07	-	-	-	-
Unigene19079_Taxus	22	RawIntensity-ye	6.98	21.15	1.59936	9.33634e-07	4.70108e-06	-	-	-	gi|224577151|gb|ACN57249.1|/6e-54/At1g62390-like protein [Capsella grandiflora]
Unigene11662_Taxus	16	RawIntensity-ye	5.07	15.35	1.59818	3.15356e-05	0.000123615	-	-	-	gi|255072327|ref|XP_002499838.1|/1e-06/radical SAM protein with TRAM and UPF0004 domains [Micromonas sp. RCC299] >gi|226515100|gb|ACO61096.1| radical SAM protein with TRAM and UPF0004 domains [Micromonas sp. RCC299]
Unigene16489_Taxus	16	RawIntensity-ye	5.07	15.35	1.59818	3.15356e-05	0.000123588	-	-	-	gi|17978954|gb|AAL47442.1|/2e-46/At1g12570/T12C24_9 [Arabidopsis thaliana]
Unigene19501_Taxus	32	RawIntensity-ye	10.15	30.71	1.59723	3.23628e-09	2.2357e-08	-	-	-	gi|115469466|ref|NP_001058332.1|/3e-91/Os06g0671700 [Oryza sativa (japonica cultivar-group)] >gi|113596372|dbj|BAF20246.1| Os06g0671700 [Oryza sativa Japonica Group]
Unigene19536_Taxus	26	RawIntensity-ye	8.24	24.91	1.59601	1.03993e-07	5.94491e-07	-	-	-	gi|170717467|ref|YP_001783477.1|/5e-12/ABC transporter related [Haemophilus somnus 2336] >gi|168825596|gb|ACA30967.1| ABC transporter related [Haemophilus somnus 2336]
Unigene25023_Taxus	20	RawIntensity-ye	6.34	19.12	1.59253	3.42748e-06	1.59012e-05	-	-	-	-
Unigene23700_Taxus	20	RawIntensity-ye	6.34	19.12	1.59253	3.42748e-06	1.58971e-05	GO:0005739//mitochondrion	-	-	gi|115448909|ref|NP_001048234.1|/5e-06/Os02g0767900 [Oryza sativa (japonica cultivar-group)] >gi|113537765|dbj|BAF10148.1| Os02g0767900 [Oryza sativa Japonica Group]
Unigene14884_Taxus	37	RawIntensity-ye	11.73	35.34	1.5911	2.36194e-10	1.82898e-09	-	-	-	gi|195657215|gb|ACG48075.1|/2e-91/INDETERMINATE-related protein 1 [Zea mays]
Unigene7206_Taxus	128	RawIntensity-ye	40.59	122.25	1.59064	4.5075e-14	5.66459e-13	-	-	-	gi|77556447|gb|ABA99243.1|/4e-57/WRKY DNA binding domain containing protein, expressed [Oryza sativa (japonica cultivar-group)]
Unigene31195_Taxus	51	RawIntensity-ye	16.17	48.67	1.58971	8.4377e-14	1.02321e-12	-	-	-	gi|18416540|ref|NP_567718.1|/3e-12/Clp amino terminal domain-containing protein [Arabidopsis thaliana] >gi|195604812|gb|ACG24236.1| ATP-dependent Clp protease ATP-binding subunit clpA [Zea mays]
Unigene4891_Taxus	17	RawIntensity-ye	5.39	16.22	1.58942	1.99596e-05	8.13022e-05	-	-	-	-
Unigene10506_Taxus	92	RawIntensity-ye	29.17	87.77	1.58924	5.9952e-15	8.19207e-14	-	-	-	-
Unigene16325_Taxus	83	RawIntensity-ye	26.32	79.08	1.58715	1.25899e-13	1.44587e-12	GO:0009533//chloroplast stromal thylakoid;GO:0009535//chloroplast thylakoid membrane	GO:0020037//heme binding;GO:0016688//L-ascorbate peroxidase activity	GO:0006979//response to oxidative stress;GO:0055114//oxidation reduction	gi|25992557|gb|AAN77158.1|/9e-10/thylakoid-bound ascorbate peroxidase [Triticum aestivum]
Unigene22664_Taxus	14	RawIntensity-ye	4.44	13.33	1.58605	0.000117886	0.000413947	-	-	-	-
Unigene13492_Taxus	14	RawIntensity-ye	4.44	13.33	1.58605	0.000117886	0.000413866	-	-	-	gi|238844020|gb|EEQ33682.1|/1e-09/amidase [Microsporum canis CBS 113480]
Unigene17631_Taxus	42	RawIntensity-ye	13.32	39.98	1.58568	1.74427e-11	1.52749e-10	-	-	-	gi|115447863|ref|NP_001047711.1|/3e-06/Os02g0673100 [Oryza sativa (japonica cultivar-group)] >gi|50251239|dbj|BAD27825.1| aluminum-activated malate transporter-like [Oryza sativa Japonica Group] >gi|50253199|dbj|BAD29455.1| aluminum-activated malate transporter-like [Oryza sativa Japonica Group] >gi|113537242|dbj|BAF09625.1| Os02g0673100 [Oryza sativa Japonica Group]
Unigene110_Taxus	84	RawIntensity-ye	26.64	79.95	1.5855	0	0	-	-	-	gi|156138809|dbj|BAF75896.1|/6e-37/glucosyltransferase [Cyclamen persicum]
Unigene23712_Taxus	44	RawIntensity-ye	13.95	41.71	1.58013	7.21024e-12	6.58323e-11	-	-	-	-
Unigene26035_Taxus	404	RawIntensity-ye	128.11	382.96	1.57981	1.35225e-13	1.54607e-12	-	-	-	gi|57116679|gb|AAW33814.1|/2e-24/sorbitol dehydrogenase [Malus x domestica]
Unigene21958_Taxus	97	RawIntensity-ye	30.76	91.83	1.57791	5.75096e-14	7.1871e-13	-	-	-	-
Unigene31009_Taxus	113	RawIntensity-ye	35.83	106.89	1.57689	1.8896e-13	2.10168e-12	-	-	-	-
Unigene25759_Taxus	15	RawIntensity-ye	4.76	14.19	1.57584	7.43208e-05	0.000269979	-	-	-	-
Unigene31652_Taxus	273	RawIntensity-ye	86.57	257.82	1.57443	1.16795e-13	1.35866e-12	-	-	-	gi|51209889|ref|YP_063553.1|/1e-18/ribosomal protein L11 [Gracilaria tenuistipitata var. liui] >gi|68053125|sp|Q6B907.1|RK11_GRATL RecName: Full=50S ribosomal protein L11, chloroplastic >gi|50657643|gb|AAT79628.1| 50S ribosomal protein L11 [Gracilaria tenuistipitata var. liui]
Unigene36283_Taxus	27	RawIntensity-ye	8.56	25.49	1.57425	9.82114e-08	5.6287e-07	-	-	-	gi|186496330|ref|NP_565197.3|/3e-13/HAC1 (HISTONE ACETYLTRANSFERASE OF THE CBP FAMILY 1); H3/H4 histone acetyltransferase/ histone acetyltransferase/ transcription cofactor [Arabidopsis thaliana]
Unigene7123_Taxus	27	RawIntensity-ye	8.56	25.49	1.57425	9.82114e-08	5.62691e-07	-	-	-	gi|115434752|ref|NP_001042134.1|/2e-24/Os01g0169500 [Oryza sativa (japonica cultivar-group)] >gi|113531665|dbj|BAF04048.1| Os01g0169500 [Oryza sativa Japonica Group]
Unigene5141_Taxus	74	RawIntensity-ye	23.47	69.81	1.57262	0	0	GO:0016021//integral to membrane;GO:0009507//chloroplast	GO:0005488//binding;GO:0003824//catalytic activity;GO:0005216//ion channel activity	GO:0006811//ion transport;GO:0008152//metabolic process	gi|163256844|emb|CAO02690.1|/2e-68/DMI1 protein [Medicago truncatula var. truncatula]
Unigene23880_Taxus	16	RawIntensity-ye	5.07	15.06	1.57066	4.6908e-05	0.000178242	GO:0005743//mitochondrial inner membrane;GO:0016021//integral to membrane	GO:0005488//binding;GO:0005215//transporter activity	GO:0006810//transport	gi|193211364|ref|NP_001105434.1|/1e-23/ADP,ATP carrier protein 2, mitochondrial precursor [Zea mays] >gi|113460|sp|P12857.2|ADT2_MAIZE RecName: Full=ADP,ATP carrier protein 2, mitochondrial; AltName: Full=ADP/ATP translocase 2; AltName: Full=Adenine nucleotide translocator 2; Short=ANT 2; Flags: Precursor >gi|22164|emb|CAA41812.1| adenine nucleotide translocator [Zea mays]
Unigene36287_Taxus	20	RawIntensity-ye	6.34	18.83	1.57048	5.08326e-06	2.29384e-05	-	-	-	gi|154359306|gb|ABS79675.1|/2e-17/At5g30510-like protein [Arabidopsis halleri subsp. halleri]
Unigene16492_Taxus	20	RawIntensity-ye	6.34	18.83	1.57048	5.08326e-06	2.29327e-05	-	-	-	gi|116055890|emb|CAL57975.1|/5e-06/ribosomal small subunit pseudouridine synthase A (ISS) [Ostreococcus tauri]
Unigene32439_Taxus	32	RawIntensity-ye	10.15	30.13	1.56972	7.06636e-09	4.72737e-08	-	-	-	gi|119473819|ref|XP_001258785.1|/9e-06/benzodiazepine receptor family protein [Neosartorya fischeri NRRL 181] >gi|119406938|gb|EAW16888.1| benzodiazepine receptor family protein [Neosartorya fischeri NRRL 181]
Unigene28752_Taxus	102	RawIntensity-ye	32.34	95.88	1.56791	0	0	-	-	-	-
Unigene13011_Taxus	82	RawIntensity-ye	26	77.06	1.56747	0	0	-	-	-	gi|116057903|emb|CAL54106.1|/1e-08/OTU (ovarian tumor)-like cysteine protease (ISS) [Ostreococcus tauri]
Unigene16738_Taxus	103	RawIntensity-ye	32.66	96.75	1.56674	0	0	-	-	-	gi|30023772|gb|AAP13419.1|/7e-72/At3g44330 [Arabidopsis thaliana]
Unigene30647_Taxus	29	RawIntensity-ye	9.2	27.23	1.56549	3.9986e-08	2.4123e-07	-	-	-	gi|115472083|ref|NP_001059640.1|/1e-16/Os07g0481000 [Oryza sativa (japonica cultivar-group)] >gi|113611176|dbj|BAF21554.1| Os07g0481000 [Oryza sativa Japonica Group]
Unigene27135_Taxus	21	RawIntensity-ye	6.66	19.7	1.5646	3.22638e-06	1.51046e-05	-	-	-	-
Unigene12144_Taxus	30	RawIntensity-ye	9.51	28.1	1.56305	2.55248e-08	1.58888e-07	-	-	-	-
Unigene21135_Taxus	13	RawIntensity-ye	4.12	12.17	1.56261	0.00027907	0.000916952	-	-	-	gi|33519176|gb|AAQ20903.1|/1e-40/WRKY3 [Oryza sativa Japonica Group] >gi|33519198|gb|AAQ20914.1| WRKY14 [Oryza sativa Japonica Group] >gi|46394286|tpg|DAA05081.1| TPA_inf: WRKY transcription factor 16 [Oryza sativa (japonica cultivar-group)] >gi|58042739|gb|AAW63713.1| WRKY16 [Oryza sativa Japonica Group]
Unigene30757_Taxus	73	RawIntensity-ye	23.15	68.36	1.56214	0	0	-	-	-	-
Unigene26429_Taxus	43	RawIntensity-ye	13.64	40.27	1.56186	2.42486e-11	2.07109e-10	-	-	-	-
Unigene35195_Taxus	61	RawIntensity-ye	19.34	57.07	1.56114	1.68754e-14	2.22646e-13	-	-	-	gi|225562165|gb|EEH10445.1|/2e-39/xaa-pro aminopeptidase [Ajellomyces capsulatus G186AR]
Unigene21252_Taxus	57	RawIntensity-ye	18.08	53.3	1.55974	4.21884e-14	5.31668e-13	-	-	-	gi|87241133|gb|ABD32991.1|/1e-136/Protein kinase [Medicago truncatula]
Unigene17115_Taxus	22	RawIntensity-ye	6.98	20.57	1.55924	2.04902e-06	9.78614e-06	-	-	-	-
Unigene34023_Taxus	49	RawIntensity-ye	15.54	45.77	1.55842	1.16418e-12	1.15749e-11	-	-	-	gi|71842326|ref|YP_277414.1|/5e-39/ribosomal protein L6 [Emiliania huxleyi] >gi|119361652|sp|Q4G353.1|RK6_EMIHU RecName: Full=50S ribosomal protein L6, chloroplastic >gi|60101569|gb|AAX13913.1| ribosomal protein L6 [Emiliania huxleyi]
Unigene25602_Taxus	63	RawIntensity-ye	19.98	58.81	1.5575	0	0	-	-	-	-
Unigene23054_Taxus	307	RawIntensity-ye	97.35	286.49	1.55723	0	0	GO:0016020//membrane;GO:0005739//mitochondrion	-	GO:0033554//cellular response to stress	gi|70985919|ref|XP_748464.1|/6e-06/benzodiazepine receptor family protein [Aspergillus fumigatus Af293] >gi|66846093|gb|EAL86426.1| benzodiazepine receptor family protein [Aspergillus fumigatus Af293] >gi|159128401|gb|EDP53516.1| benzodiazepine receptor family protein [Aspergillus fumigatus A1163]
Unigene20909_Taxus	18	RawIntensity-ye	5.71	16.8	1.5569	1.87424e-05	7.66042e-05	-	-	-	gi|115444875|ref|NP_001046217.1|/8e-09/Os02g0199800 [Oryza sativa (japonica cultivar-group)] >gi|113535748|dbj|BAF08131.1| Os02g0199800 [Oryza sativa Japonica Group]
Unigene35127_Taxus	32	RawIntensity-ye	10.15	29.84	1.55577	1.04091e-08	6.77477e-08	-	-	-	-
Unigene15041_Taxus	14	RawIntensity-ye	4.44	13.04	1.55431	0.000175328	0.000595209	-	-	-	-
Unigene10899_Taxus	14	RawIntensity-ye	4.44	13.04	1.55431	0.000175328	0.000595097	-	-	-	-
Unigene217_Taxus	14	RawIntensity-ye	4.44	13.04	1.55431	0.000175328	0.000594984	-	-	-	gi|108740407|gb|ABG01559.1|/4e-17/disease resistance protein [Arabidopsis thaliana]
Unigene11046_Taxus	75	RawIntensity-ye	23.78	69.81	1.55368	0	0	-	-	-	gi|212542297|ref|XP_002151303.1|/4e-09/vacuolar protein sorting-associated protein vps13 [Penicillium marneffei ATCC 18224] >gi|210066210|gb|EEA20303.1| vacuolar protein sorting-associated protein vps13 [Penicillium marneffei ATCC 18224]
Unigene31617_Taxus	20	RawIntensity-ye	6.34	18.54	1.54809	7.5148e-06	3.26658e-05	-	-	-	-
Unigene33196_Taxus	61	RawIntensity-ye	19.34	56.49	1.54641	1.88738e-14	2.47922e-13	-	-	-	-
Unigene28896_Taxus	138	RawIntensity-ye	43.76	127.75	1.54564	1.57874e-13	1.77347e-12	-	-	-	gi|122938387|gb|ABM69039.1|/8e-06/expansin-like protein [Cunninghamia lanceolata]
Unigene9346_Taxus	87	RawIntensity-ye	27.59	80.53	1.54538	0	0	-	-	-	gi|149243951|ref|XP_001526552.1|/2e-25/peptide methionine sulfoxide reductase msrB [Lodderomyces elongisporus NRRL YB-4239] >gi|146448946|gb|EDK43202.1| peptide methionine sulfoxide reductase msrB [Lodderomyces elongisporus NRRL YB-4239]
Unigene20223_Taxus	89	RawIntensity-ye	28.22	82.27	1.54365	0	0	GO:0000145//exocyst	-	GO:0009846//pollen germination;GO:0009860//pollen tube growth	gi|21542231|sp|O75006.1|SEC15_SCHPO/4e-36/RecName: Full=Exocyst complex component sec15
Unigene29171_Taxus	21	RawIntensity-ye	6.66	19.41	1.54321	4.76388e-06	2.15621e-05	-	-	-	gi|224923759|gb|ACN67534.1|/2e-06/cellulose synthase-like protein H1 [Hordeum vulgare subsp. vulgare]
Unigene20757_Taxus	54	RawIntensity-ye	17.12	49.83	1.54133	1.99618e-13	2.20388e-12	-	-	-	gi|171702849|dbj|BAG16380.1|/6e-37/GRAS family transcription factor [Brassica rapa var. perviridis]
Unigene16790_Taxus	86	RawIntensity-ye	27.27	79.37	1.54128	0	0	-	-	-	gi|115489004|ref|NP_001066989.1|/3e-15/Os12g0554000 [Oryza sativa (japonica cultivar-group)]
Unigene2396_Taxus	27	RawIntensity-ye	8.56	24.91	1.54104	2.13326e-07	1.16829e-06	-	GO:0017111//nucleoside-triphosphatase activity	-	gi|168038530|ref|XP_001771753.1|/0.0/ATP-binding cassette transporter, subfamily C, member 8, group MRP protein PpABCC8 [Physcomitrella patens subsp. patens] >gi|162676884|gb|EDQ63361.1| ATP-binding cassette transporter, subfamily C, member 8, group MRP protein PpABCC8 [Physcomitrella patens subsp. patens]
Unigene28133_Taxus	44	RawIntensity-ye	13.95	40.56	1.53979	3.33762e-11	2.82387e-10	-	-	-	gi|194476582|ref|YP_002048761.1|/9e-07/Ribose 5-phosphate isomerase [Paulinella chromatophora] >gi|171191589|gb|ACB42551.1| Ribose 5-phosphate isomerase [Paulinella chromatophora]
Unigene30596_Taxus	176	RawIntensity-ye	55.81	161.93	1.53677	0	0	-	-	-	-
Unigene7627_Taxus	64	RawIntensity-ye	20.29	58.81	1.53529	0	0	-	-	-	gi|121715198|ref|XP_001275208.1|/2e-33/retinoblastoma-binding protein [Aspergillus clavatus NRRL 1] >gi|119403365|gb|EAW13782.1| retinoblastoma-binding protein [Aspergillus clavatus NRRL 1]
Unigene36286_Taxus	18	RawIntensity-ye	5.71	16.51	1.53178	2.76858e-05	0.000110229	-	-	-	gi|7381225|gb|AAF61443.1|AF139187_1/2e-08/root border cell-specific protein [Pisum sativum]
Unigene36141_Taxus	50	RawIntensity-ye	15.86	45.77	1.52901	2.31504e-12	2.22789e-11	-	-	-	gi|108707722|gb|ABF95517.1|/1e-129/AMP-binding enzyme family protein, expressed [Oryza sativa (japonica cultivar-group)]
Unigene18996_Taxus	19	RawIntensity-ye	6.03	17.38	1.5272	1.75008e-05	7.18559e-05	-	-	-	-
Unigene13181_Taxus	33	RawIntensity-ye	10.46	30.13	1.52632	1.43185e-08	9.20602e-08	-	-	-	gi|115487698|ref|NP_001066336.1|/6e-37/Os12g0189700 [Oryza sativa (japonica cultivar-group)] >gi|77553230|gb|ABA96026.1| expressed protein [Oryza sativa (japonica cultivar-group)] >gi|113648843|dbj|BAF29355.1| Os12g0189700 [Oryza sativa Japonica Group]
Unigene23336_Taxus	33	RawIntensity-ye	10.46	30.13	1.52632	1.43185e-08	9.20273e-08	-	-	-	gi|195643386|gb|ACG41161.1|/5e-06/zinc finger C-x8-C-x5-C-x3-H type family protein [Zea mays]
Unigene36194_Taxus	73	RawIntensity-ye	23.15	66.63	1.52516	0	0	-	-	-	gi|115476236|ref|NP_001061714.1|/1e-102/Os08g0387500 [Oryza sativa (japonica cultivar-group)]
Unigene15402_Taxus	34	RawIntensity-ye	10.78	31	1.52391	9.13848e-09	6.01962e-08	-	-	-	gi|259148664|emb|CAY81909.1|/4e-06/EC1118_1M3_2597p [Saccharomyces cerevisiae EC1118]
Unigene6499_Taxus	112	RawIntensity-ye	35.52	101.97	1.52144	0	0	-	-	-	-
Unigene34553_Taxus	50	RawIntensity-ye	15.86	45.48	1.51984	3.37642e-12	3.19128e-11	-	-	-	-
Unigene29099_Taxus	52	RawIntensity-ye	16.49	47.22	1.51781	1.40776e-12	1.38362e-11	-	-	-	gi|148910765|gb|ABR18449.1|/2e-10/unknown [Picea sitchensis]
Unigene20633_Taxus	53	RawIntensity-ye	16.81	48.09	1.51642	8.91954e-13	8.9925e-12	-	-	-	gi|167427545|gb|ABZ80409.1|/1e-21/hairpin-inducing protein [Casuarina glauca]
Unigene10230_Taxus	291	RawIntensity-ye	92.28	263.61	1.51432	1.20792e-13	1.39345e-12	-	-	-	-
Unigene17325_Taxus	16	RawIntensity-ye	5.07	14.48	1.514	0.000102564	0.000365928	-	-	-	-
Unigene26273_Taxus	105	RawIntensity-ye	33.3	95.02	1.51271	0	0	GO:0016023//cytoplasmic membrane-bounded vesicle	-	GO:0009926//auxin polar transport	gi|224117652|ref|XP_002317634.1|/3e-06/auxin efflux carrier family protein [Populus trichocarpa] >gi|222860699|gb|EEE98246.1| auxin efflux carrier family protein [Populus trichocarpa]
Unigene20201_Taxus	374	RawIntensity-ye	118.6	338.06	1.51118	4.17666e-13	4.38781e-12	GO:0005886//plasma membrane	GO:0048032;GO:0003677//DNA binding	GO:0007267//cell-cell signaling	gi|79458120|ref|NP_191976.2|/2e-19/DNA binding [Arabidopsis thaliana] >gi|48310044|gb|AAT41742.1| At4g00670 [Arabidopsis thaliana] >gi|54606860|gb|AAV34778.1| At4g00670 [Arabidopsis thaliana]
Unigene17262_Taxus	25	RawIntensity-ye	7.93	22.6	1.51093	1.13559e-06	5.63755e-06	-	-	-	gi|190406950|gb|EDV10217.1|/2e-11/MTL1 [Saccharomyces cerevisiae RM11-1a]
Unigene18114_Taxus	83	RawIntensity-ye	26.32	74.74	1.50572	1.25899e-13	1.4468e-12	-	-	-	gi|255076059|ref|XP_002501704.1|/5e-89/cytochrome oxidase biogenesis family [Micromonas sp. RCC299] >gi|226516968|gb|ACO62962.1| cytochrome oxidase biogenesis family [Micromonas sp. RCC299]
Unigene29531_Taxus	151	RawIntensity-ye	47.88	135.86	1.50463	0	0	-	-	-	-
Unigene35717_Taxus	238	RawIntensity-ye	75.47	214.07	1.50411	6.80566e-13	6.96274e-12	-	-	-	gi|224006530|ref|XP_002292225.1|/2e-61/glycine decarboxylase t-protein [Thalassiosira pseudonana CCMP1335] >gi|220971867|gb|EED90200.1| glycine decarboxylase t-protein [Thalassiosira pseudonana CCMP1335]
Unigene16791_Taxus	20	RawIntensity-ye	6.34	17.96	1.50223	1.62601e-05	6.70831e-05	-	-	-	gi|255077940|ref|XP_002502550.1|/2e-06/rieske ferredoxin [Micromonas sp. RCC299] >gi|226517815|gb|ACO63808.1| rieske ferredoxin [Micromonas sp. RCC299]
Unigene3222_Taxus	41	RawIntensity-ye	13	36.79	1.5008	5.7895e-10	4.33755e-09	-	-	-	gi|115449585|ref|NP_001048502.1|/2e-56/Os02g0815400 [Oryza sativa (japonica cultivar-group)] >gi|113538033|dbj|BAF10416.1| Os02g0815400 [Oryza sativa Japonica Group]
Unigene28090_Taxus	107	RawIntensity-ye	33.93	95.88	1.49867	0	0	-	-	-	-
Unigene18414_Taxus	22	RawIntensity-ye	6.98	19.7	1.4969	6.51308e-06	2.89907e-05	-	-	-	-
Unigene1213_Taxus	174	RawIntensity-ye	55.18	155.56	1.49525	1.19904e-13	1.38676e-12	-	-	-	gi|226461167|gb|EEH58460.1|/2e-12/voltage-gated ion channel superfamily [Micromonas pusilla CCMP1545]
Unigene32866_Taxus	46	RawIntensity-ye	14.59	41.13	1.49521	6.19854e-11	5.08659e-10	-	-	-	gi|255670510|dbj|BAF30368.2|/8e-17/Os12g0633000 [Oryza sativa Japonica Group]
Unigene16011_Taxus	59	RawIntensity-ye	18.71	52.72	1.49454	1.32783e-13	1.52007e-12	-	-	-	gi|115448765|ref|NP_001048162.1|/2e-39/Os02g0755400 [Oryza sativa (japonica cultivar-group)] >gi|113537693|dbj|BAF10076.1| Os02g0755400 [Oryza sativa Japonica Group]
Unigene3155_Taxus	209	RawIntensity-ye	66.28	186.26	1.49067	8.9262e-14	1.06664e-12	-	-	-	-
Unigene3448_Taxus	162	RawIntensity-ye	51.37	144.26	1.48967	0	0	-	-	-	gi|67515338|gb|AAY68198.1|/3e-36/RNA polymerase IV second largest subunit [Rhododendron macrophyllum]
Unigene16052_Taxus	69	RawIntensity-ye	21.88	61.41	1.48886	0	0	-	-	-	gi|159472374|ref|XP_001694326.1|/6e-26/CGLD23 protein required for cyt b6 assembly [Chlamydomonas reinhardtii] >gi|145308404|gb|ABP57444.1| CCB4 [Chlamydomonas reinhardtii] >gi|158276989|gb|EDP02759.1| CGLD23 protein required for cyt b6 assembly [Chlamydomonas reinhardtii]
Unigene12009_Taxus	44	RawIntensity-ye	13.95	39.11	1.48727	2.20034e-10	1.71195e-09	-	-	-	-
Unigene20313_Taxus	45	RawIntensity-ye	14.27	39.98	1.48629	1.4067e-10	1.11471e-09	GO:0016020//membrane;GO:0009536//plastid	GO:0005488//binding;GO:0016787//hydrolase activity	-	gi|2492515|sp|Q39444.1|FTSH_CAPAN/2e-65/RecName: Full=Cell division protease ftsH homolog, chloroplastic; Flags: Precursor >gi|929013|emb|CAA62084.1| ATPase [Capsicum annuum]
Unigene6938_Taxus	46	RawIntensity-ye	14.59	40.85	1.48536	9.00374e-11	7.2725e-10	-	-	-	gi|159464629|ref|XP_001690544.1|/6e-06/EMP/nonaspanin domain family protein [Chlamydomonas reinhardtii] >gi|158280044|gb|EDP05803.1| EMP/nonaspanin domain family protein [Chlamydomonas reinhardtii]
Unigene35660_Taxus	47	RawIntensity-ye	14.9	41.71	1.48508	5.75244e-11	4.73347e-10	-	-	-	gi|162463869|ref|NP_001105979.1|/6e-72/tassel seed1 [Zea mays] >gi|84626293|gb|ABC59691.1| lipoxygenase [Zea mays]
Unigene24874_Taxus	16	RawIntensity-ye	5.07	14.19	1.48482	0.00015072	0.000514289	-	-	-	-
Unigene17917_Taxus	16	RawIntensity-ye	5.07	14.19	1.48482	0.00015072	0.000514192	-	-	-	-
Unigene24233_Taxus	16	RawIntensity-ye	5.07	14.19	1.48482	0.00015072	0.000514094	-	-	-	-
Unigene20724_Taxus	67	RawIntensity-ye	21.25	59.38	1.48251	0	0	-	-	-	gi|255672945|dbj|BAF04136.2|/1e-103/Os01g0182900 [Oryza sativa Japonica Group]
Unigene15645_Taxus	17	RawIntensity-ye	5.39	15.06	1.48236	9.48242e-05	0.000340474	-	-	-	gi|6587842|gb|AAF18531.1|AC006551_17/3e-80/Similar to auxin-independent growth promoter [Arabidopsis thaliana]
Unigene34972_Taxus	70	RawIntensity-ye	22.2	61.99	1.48148	0	0	-	-	-	gi|38346117|emb|CAE04595.2|/7e-35/OSJNBb0006N15.12 [Oryza sativa (japonica cultivar-group)]
Unigene15822_Taxus	70	RawIntensity-ye	22.2	61.99	1.48148	0	0	-	-	-	gi|259486122|tpe|CBF83711.1|/2e-08/TPA: MRS7 family protein (AFU_orthologue; AFUA_3G08230) [Aspergillus nidulans FGSC A4]
Unigene9507_Taxus	56	RawIntensity-ye	17.76	49.54	1.47996	1.01985e-12	1.01906e-11	-	-	-	gi|212007818|gb|ACJ22504.1|/7e-79/cell division AAA ATPase family protein [Triticum aestivum]
Unigene21353_Taxus	59	RawIntensity-ye	18.71	52.14	1.47858	2.76668e-13	3.00478e-12	-	-	-	gi|5080775|gb|AAD39285.1|AC007576_8/4e-48/Unknown protein [Arabidopsis thaliana]
Unigene36246_Taxus	90	RawIntensity-ye	28.54	79.37	1.47561	0	0	-	-	-	gi|75291915|sp|Q6S5G3.1|TOC90_ARATH/1e-117/RecName: Full=Translocase of chloroplast 90, chloroplastic; Short=AtToc90; AltName: Full=90 kDa chloroplast outer envelope protein; AltName: Full=Plastid protein import 4 >gi|42718957|gb|AAS38569.1| chloroplast import receptor Toc90 [Arabidopsis thaliana]
Unigene31818_Taxus	120	RawIntensity-ye	38.05	105.73	1.47442	0	0	-	-	-	gi|159462702|ref|XP_001689581.1|/7e-08/plastid ribosomal protein L34 [Chlamydomonas reinhardtii] >gi|158283569|gb|EDP09319.1| plastid ribosomal protein L34 [Chlamydomonas reinhardtii]
Unigene12580_Taxus	48	RawIntensity-ye	15.22	42.29	1.47435	5.34926e-11	4.41381e-10	-	-	-	gi|149391227|gb|ABR25631.1|/7e-06/crs1/yhby domain containing protein [Oryza sativa Indica Group]
Unigene36181_Taxus	119	RawIntensity-ye	37.74	104.86	1.4743	0	0	-	-	-	gi|3800749|gb|AAC68861.1|/0.0/3-ketoacyl-ACP synthase [Cuphea hookeriana]
Unigene33902_Taxus	79	RawIntensity-ye	25.05	69.52	1.47262	0	0	-	-	-	gi|148362058|gb|ABQ59608.1|/3e-10/NFR1b [Glycine max]
Unigene12247_Taxus	27	RawIntensity-ye	8.56	23.75	1.47224	9.75826e-07	4.89709e-06	-	-	-	gi|86991198|gb|ABD16060.1|/1e-29/Kelch-motif containing protein [Oryza sativa Indica Group]
Unigene32386_Taxus	164	RawIntensity-ye	52.01	144.26	1.47181	1.19016e-13	1.37826e-12	-	-	-	gi|20197084|gb|AAM14909.1|/9e-08/Expressed protein [Arabidopsis thaliana] >gi|88010859|gb|ABD38864.1| At2g34585 [Arabidopsis thaliana]
Unigene33825_Taxus	153	RawIntensity-ye	48.52	134.41	1.46999	0	0	-	-	-	gi|116790833|gb|ABK25757.1|/3e-28/unknown [Picea sitchensis]
Unigene19997_Taxus	33	RawIntensity-ye	10.46	28.97	1.46968	6.46776e-08	3.82748e-07	-	-	-	gi|240110098|gb|EER28257.1|/1e-20/Histone-like transcription factor and archaeal histone family protein [Coccidioides posadasii C735 delta SOWgp]
Unigene27626_Taxus	197	RawIntensity-ye	62.47	172.94	1.46904	0	0	-	-	-	-
Unigene34145_Taxus	35	RawIntensity-ye	11.1	30.71	1.46815	2.62656e-08	1.63104e-07	-	-	-	gi|186522588|ref|NP_196857.2|/6e-09/KEG (KEEP ON GOING); protein binding / protein kinase/ ubiquitin-protein ligase [Arabidopsis thaliana] >gi|218526495|sp|Q9FY48.2|KEG_ARATH RecName: Full=E3 ubiquitin-protein ligase KEG; AltName: Full=RING finger protein KEG; AltName: Full=Protein KEEP ON GOING >gi|83817349|gb|ABC46683.1| RING E3 ligase protein [Arabidopsis thaliana]
Unigene32931_Taxus	42	RawIntensity-ye	13.32	36.79	1.46572	1.13278e-09	8.18364e-09	-	-	-	gi|255677412|dbj|BAF20526.2|/3e-09/Os06g0724400 [Oryza sativa Japonica Group]
Unigene16105_Taxus	67	RawIntensity-ye	21.25	58.52	1.46147	0	0	-	-	-	gi|116059478|emb|CAL55185.1|/1e-41/tRNA/rRNA methyltransferase (ISS) [Ostreococcus tauri]
Unigene23143_Taxus	23	RawIntensity-ye	7.29	19.99	1.45529	8.76956e-06	3.78821e-05	-	-	-	-
Unigene23406_Taxus	16	RawIntensity-ye	5.07	13.9	1.45503	0.000220528	0.000737114	-	-	-	-
Unigene3555_Taxus	16	RawIntensity-ye	5.07	13.9	1.45503	0.000220528	0.000736977	-	-	-	gi|144225745|emb|CAM84269.1|/3e-70/abscisic insensitive 1B [Populus tremula] >gi|144225755|emb|CAM84274.1| abscisic insensitive 1B [Populus tremula]
Unigene30470_Taxus	30	RawIntensity-ye	9.51	26.07	1.45487	3.6374e-07	1.92243e-06	-	-	-	gi|27923876|sp|Q9BAC3.1|RRP3_EUGMU/4e-16/RecName: Full=Probable 30S ribosomal protein 3, chloroplastic; Short=PSRP-3 >gi|13487722|gb|AAK27691.1|AF347931_1 ycf65 [Euglena mutabilis] >gi|77744793|gb|ABB02350.1| Ycf65 [Euglena mutabilis]
Unigene6472_Taxus	20	RawIntensity-ye	6.34	17.38	1.45487	3.46946e-05	0.000134968	-	-	-	gi|255670598|dbj|BAF07783.2|/7e-11/Os02g0143400 [Oryza sativa Japonica Group]
Unigene26425_Taxus	54	RawIntensity-ye	17.12	46.93	1.45483	7.69362e-12	7.00326e-11	-	-	-	gi|168017549|ref|XP_001761310.1|/5e-07/predicted protein [Physcomitrella patens subsp. patens] >gi|162687650|gb|EDQ74032.1| predicted protein [Physcomitrella patens subsp. patens]
Unigene9721_Taxus	34	RawIntensity-ye	10.78	29.55	1.4548	5.97212e-08	3.55287e-07	-	-	-	gi|154281953|ref|XP_001541789.1|/3e-26/monothiol glutaredoxin-5, mitochondrial precursor [Ajellomyces capsulatus NAm1] >gi|150411968|gb|EDN07356.1| monothiol glutaredoxin-5, mitochondrial precursor [Ajellomyces capsulatus NAm1]
Unigene21741_Taxus	48	RawIntensity-ye	15.22	41.71	1.45442	1.11831e-10	8.93656e-10	-	-	-	-
Unigene33628_Taxus	25	RawIntensity-ye	7.93	21.73	1.4543	3.52076e-06	1.63046e-05	-	-	-	gi|116783723|gb|ABK23062.1|/8e-26/unknown [Picea sitchensis]
Unigene18296_Taxus	43	RawIntensity-ye	13.64	37.37	1.45404	1.04688e-09	7.60279e-09	-	-	-	-
Unigene35823_Taxus	19	RawIntensity-ye	6.03	16.51	1.45311	5.4984e-05	0.00020679	-	-	-	gi|8493580|gb|AAF75803.1|AC011000_6/1e-32/Contains weak similarity to leaf protein from Ipomea nil gb|D85101 and contains a RepB PF|01051 protein and multiple PPR PF|01535 repeats [Arabidopsis thaliana]
Unigene31048_Taxus	19	RawIntensity-ye	6.03	16.51	1.45311	5.4984e-05	0.000206747	-	-	-	gi|15231906|ref|NP_188086.1|/4e-32/CYP72A14; electron carrier/ heme binding / iron ion binding / monooxygenase/ oxygen binding [Arabidopsis thaliana] >gi|13605897|gb|AAK32934.1|AF367347_1 AT3g14680/MIE1_18 [Arabidopsis thaliana] >gi|9294390|dbj|BAB02400.1| cytochrome P450 [Arabidopsis thaliana] >gi|24111277|gb|AAN46762.1| At3g14680/MIE1_18 [Arabidopsis thaliana]
Unigene30747_Taxus	129	RawIntensity-ye	40.91	111.53	1.44691	0	0	-	-	-	gi|194466125|gb|ACF74293.1|/1e-17/universal stress protein [Arachis hypogaea]
Unigene15334_Taxus	42	RawIntensity-ye	13.32	36.21	1.44279	2.3663e-09	1.6589e-08	-	-	-	gi|39725415|emb|CAE09058.1|/1e-54/MYB transcription factor [Eucalyptus gunnii]
Unigene30063_Taxus	161	RawIntensity-ye	51.05	138.76	1.44261	0	0	-	-	-	-
Unigene928_Taxus	81	RawIntensity-ye	25.69	69.81	1.44223	4.04122e-14	5.10356e-13	GO:0016023//cytoplasmic membrane-bounded vesicle;GO:0016020//membrane	-	-	gi|115455067|ref|NP_001051134.1|/1e-103/Os03g0726300 [Oryza sativa (japonica cultivar-group)] >gi|41469277|gb|AAS07159.1| expressed protein [Oryza sativa Japonica Group] >gi|50428731|gb|AAT77082.1| expressed protein [Oryza sativa Japonica Group] >gi|113549605|dbj|BAF13048.1| Os03g0726300 [Oryza sativa Japonica Group]
Unigene35237_Taxus	119	RawIntensity-ye	37.74	102.55	1.44216	0	0	-	-	-	gi|194466209|gb|ACF74335.1|/3e-29/L-asparaginase [Arachis hypogaea]
Unigene35427_Taxus	30	RawIntensity-ye	9.51	25.78	1.43874	5.26436e-07	2.73491e-06	-	-	-	gi|255661158|gb|ACU25748.1|/3e-61/pentatricopeptide repeat-containing protein [Glandularia microphylla]
Unigene36255_Taxus	29	RawIntensity-ye	9.2	24.91	1.43702	8.28202e-07	4.17956e-06	-	-	-	gi|195622292|gb|ACG32976.1|/1e-139/protein kinase Pti1 [Zea mays]
Unigene16710_Taxus	27	RawIntensity-ye	8.56	23.17	1.43658	2.05328e-06	9.80388e-06	-	-	-	-
Unigene20284_Taxus	24	RawIntensity-ye	7.61	20.57	1.43457	8.05432e-06	3.49266e-05	-	-	-	gi|115447155|ref|NP_001047357.1|/8e-24/Os02g0602400 [Oryza sativa (japonica cultivar-group)] >gi|47497302|dbj|BAD19344.1| mitochondrial transcription termination factor-like protein [Oryza sativa Japonica Group] >gi|47848306|dbj|BAD22170.1| mitochondrial transcription termination factor-like protein [Oryza sativa Japonica Group] >gi|113536888|dbj|BAF09271.1| Os02g0602400 [Oryza sativa Japonica Gr…
Unigene27459_Taxus	24	RawIntensity-ye	7.61	20.57	1.43457	8.05432e-06	3.49182e-05	-	-	-	-
Unigene35801_Taxus	24	RawIntensity-ye	7.61	20.57	1.43457	8.05432e-06	3.49098e-05	-	-	-	gi|255679803|dbj|BAF27634.2|/4e-67/Os11g0155500 [Oryza sativa Japonica Group]
Unigene2584_Taxus	47	RawIntensity-ye	14.9	40.27	1.43439	3.63226e-10	2.76273e-09	GO:0005634//nucleus;GO:0005829//cytosol	GO:0008175//tRNA methyltransferase activity	GO:0030488//tRNA methylation	gi|85086230|ref|XP_957655.1|/2e-77/tRNA (uridine-2'-O-)-methyltransferase TRM7 [Neurospora crassa OR74A] >gi|28918749|gb|EAA28419.1| tRNA (uridine-2'-O-)-methyltransferase TRM7 [Neurospora crassa OR74A]
Unigene1432_Taxus	70	RawIntensity-ye	22.2	59.96	1.43344	0	0	-	-	-	gi|115489658|ref|NP_001067316.1|/5e-52/Os12g0624200 [Oryza sativa (japonica cultivar-group)] >gi|77556635|gb|ABA99431.1| Sodium/calcium exchanger protein, expressed [Oryza sativa (japonica cultivar-group)] >gi|113649823|dbj|BAF30335.1| Os12g0624200 [Oryza sativa Japonica Group]
Unigene12034_Taxus	19	RawIntensity-ye	6.03	16.22	1.42754	7.99236e-05	0.000289339	-	-	-	-
Unigene5872_Taxus	68	RawIntensity-ye	21.56	57.94	1.4262	4.4409e-16	6.56145e-15	-	-	-	gi|14589311|emb|CAC43238.1|/2e-26/calcium binding protein [Sesbania rostrata]
Unigene19437_Taxus	221	RawIntensity-ye	70.08	188.29	1.42588	3.79696e-14	4.81877e-13	-	-	-	gi|684978|dbj|BAA03839.1|/1e-136/OSD1 [Saccharomyces cerevisiae]
Unigene30461_Taxus	413	RawIntensity-ye	130.96	351.67	1.4251	5.90194e-13	6.11112e-12	-	-	-	gi|115451983|ref|NP_001049592.1|/6e-11/Os03g0255200 [Oryza sativa (japonica cultivar-group)] >gi|113548063|dbj|BAF11506.1| Os03g0255200 [Oryza sativa Japonica Group]
Unigene36118_Taxus	63	RawIntensity-ye	19.98	53.59	1.42341	5.31352e-13	5.5401e-12	-	-	-	gi|255935775|ref|XP_002558914.1|/2e-08/Pc13g04790 [Penicillium chrysogenum Wisconsin 54-1255] >gi|211583534|emb|CAP91548.1| Pc13g04790 [Penicillium chrysogenum Wisconsin 54-1255]
Unigene1312_Taxus	46	RawIntensity-ye	14.59	39.11	1.42256	8.17328e-10	6.04299e-09	-	-	-	gi|15224473|ref|NP_181360.1|/1e-10/DNA-binding protein-related [Arabidopsis thaliana] >gi|17981040|gb|AAL50816.1|AF453582_1 GT-1 like transcription factor [Arabidopsis thaliana]
Unigene28126_Taxus	46	RawIntensity-ye	14.59	39.11	1.42256	8.17328e-10	6.04051e-09	-	-	-	-
Unigene8295_Taxus	167	RawIntensity-ye	52.96	141.94	1.42231	1.53433e-13	1.7279e-12	-	-	-	gi|37704399|gb|AAR01504.1|/5e-30/cytosolic class I small heat shock protein 1A [Nicotiana tabacum] >gi|37704401|gb|AAR01505.1| cytosolic class I small heat shock protein 1A [Nicotiana tabacum]
Unigene4756_Taxus	75	RawIntensity-ye	23.78	63.73	1.42222	0	0	GO:0009536//plastid	-	-	gi|6136610|sp|O78473.1|YCF24_GUITH/1e-09/RecName: Full=UPF0051 protein ycf24 >gi|3603003|gb|AAC35664.1| ABC transporter [Guillardia theta]
Unigene19533_Taxus	368	RawIntensity-ye	116.7	312.57	1.42137	1.43885e-13	1.63469e-12	-	-	-	-
Unigene24614_Taxus	42	RawIntensity-ye	13.32	35.63	1.4195	4.90594e-09	3.32783e-08	-	-	-	-
Unigene2788_Taxus	42	RawIntensity-ye	13.32	35.63	1.4195	4.90594e-09	3.32657e-08	-	-	-	gi|227202782|dbj|BAH56864.1|/3e-10/AT2G18670 [Arabidopsis thaliana]
Unigene35266_Taxus	137	RawIntensity-ye	43.44	116.16	1.41902	2.78444e-13	3.02042e-12	-	-	-	gi|115480445|ref|NP_001063816.1|/3e-53/Os09g0541700 [Oryza sativa (japonica cultivar-group)] >gi|113632049|dbj|BAF25730.1| Os09g0541700 [Oryza sativa Japonica Group]
Unigene17097_Taxus	40	RawIntensity-ye	12.68	33.89	1.4183	1.20389e-08	7.79041e-08	-	-	-	gi|18405088|ref|NP_566798.1|/9e-62/short-chain dehydrogenase/reductase (SDR) family protein [Arabidopsis thaliana] >gi|9279666|dbj|BAB01223.1| alcohol dehydrogenase-like protein [Arabidopsis thaliana] >gi|23505869|gb|AAN28794.1| At3g26770/MDJ14_21 [Arabidopsis thaliana]
Unigene33244_Taxus	89	RawIntensity-ye	28.22	75.32	1.41632	0	0	-	-	-	gi|12585487|sp|Q9SCB9.1|VATC_HORVU/3e-11/RecName: Full=V-type proton ATPase subunit C; Short=V-ATPase subunit C; AltName: Full=Vacuolar proton pump subunit C >gi|6688428|emb|CAB65127.1| vacuolar H+-ATPase subunit C [Hordeum vulgare subsp. vulgare]
Unigene26084_Taxus	115	RawIntensity-ye	36.47	97.33	1.41617	0	0	-	-	GO:0001666//response to hypoxia	gi|226507966|ref|NP_001148018.1|/4e-15/hypoxia induced protein conserved region containing protein [Zea mays] >gi|195615176|gb|ACG29418.1| hypoxia induced protein conserved region containing protein [Zea mays] >gi|195618772|gb|ACG31216.1| hypoxia induced protein conserved region containing protein [Zea mays]
Unigene2589_Taxus	38	RawIntensity-ye	12.05	32.15	1.41579	2.95784e-08	1.82292e-07	-	-	-	-
Unigene20447_Taxus	25	RawIntensity-ye	7.93	21.15	1.41526	7.3747e-06	3.21033e-05	-	-	-	gi|168067423|ref|XP_001785617.1|/1e-82/predicted protein [Physcomitrella patens subsp. patens] >gi|162662750|gb|EDQ49564.1| predicted protein [Physcomitrella patens subsp. patens]
Unigene6689_Taxus	57	RawIntensity-ye	18.08	48.09	1.41134	1.24114e-11	1.10299e-10	-	-	-	gi|194476884|ref|YP_002049063.1|/4e-12/DnaJ protein [Paulinella chromatophora] >gi|171191891|gb|ACB42853.1| DnaJ protein [Paulinella chromatophora]
Unigene31903_Taxus	33	RawIntensity-ye	10.46	27.81	1.41072	2.81602e-07	1.51411e-06	-	-	-	gi|11467304|ref|NP_043161.1|/9e-06/ribosomal protein L35 [Cyanophora paradoxa] >gi|132915|sp|P14810.1|RK35_CYAPA RecName: Full=50S ribosomal protein L35, cyanelle >gi|11292|emb|CAA34907.1| ribosomal protein L35 [Cyanophora paradoxa] >gi|1016105|gb|AAA81192.1| ribosomal protein L35 [Cyanophora paradoxa]
Unigene5687_Taxus	54	RawIntensity-ye	17.12	45.48	1.40955	4.71838e-11	3.92203e-10	-	-	-	-
Unigene33338_Taxus	85	RawIntensity-ye	26.95	71.55	1.40867	0	0	-	-	-	gi|79318890|ref|NP_001031112.1|/3e-10/ATGA2OX2 (GIBBERELLIN 2-OXIDASE); gibberellin 2-beta-dioxygenase [Arabidopsis thaliana]
Unigene19722_Taxus	30	RawIntensity-ye	9.51	25.2	1.40591	1.09408e-06	5.44197e-06	-	-	-	gi|116061641|emb|CAL52359.1|/5e-16/CccP Conserved Cys-containing protein (IC) [Ostreococcus tauri]
Unigene13810_Taxus	129	RawIntensity-ye	40.91	108.34	1.40504	0	0	-	GO:0008270//zinc ion binding	GO:0051726//regulation of cell cycle;GO:0009615//response to virus;GO:0051603//proteolysis involved in cellular protein catabolic process	gi|50555780|ref|XP_505298.1|/1e-06/YALI0F11693p [Yarrowia lipolytica] >gi|49651168|emb|CAG78105.1| YALI0F11693p [Yarrowia lipolytica]
Unigene17909_Taxus	343	RawIntensity-ye	108.77	287.94	1.40449	0	0	-	-	-	gi|116309823|emb|CAH66860.1|/2e-08/H0307D04.5 [Oryza sativa (indica cultivar-group)]
Unigene9358_Taxus	19	RawIntensity-ye	6.03	15.93	1.40152	0.000115715	0.00040688	-	-	-	gi|50844675|gb|AAT84459.1|/5e-14/cytochrome b5 isoform Cb5-B [Vernicia fordii]
Unigene31603_Taxus	111	RawIntensity-ye	35.2	92.99	1.4015	0	0	-	-	-	gi|186489643|ref|NP_001117455.1|/3e-10/oxidoreductase [Arabidopsis thaliana]
Unigene30218_Taxus	27	RawIntensity-ye	8.56	22.6	1.40064	4.27114e-06	1.94542e-05	-	-	-	-
Unigene18505_Taxus	35	RawIntensity-ye	11.1	29.26	1.39837	1.63969e-07	9.11578e-07	-	-	-	gi|255679010|dbj|BAH94638.1|/2e-10/Os09g0491596 [Oryza sativa Japonica Group]
Unigene29583_Taxus	95	RawIntensity-ye	30.13	79.37	1.39739	5.9952e-15	8.21703e-14	-	-	-	gi|75333913|sp|Q9FII5.1|Y5148_ARATH/8e-12/RecName: Full=Probable leucine-rich repeat receptor-like protein kinase At5g61480; Flags: Precursor >gi|10177178|dbj|BAB10447.1| receptor protein kinase-like protein [Arabidopsis thaliana] >gi|224589737|gb|ACN59400.1| leucine-rich repeat receptor-like protein kinase [Arabidopsis thaliana]
Unigene16478_Taxus	34	RawIntensity-ye	10.78	28.39	1.39703	2.57428e-07	1.39791e-06	-	-	-	-
Unigene5057_Taxus	33	RawIntensity-ye	10.46	27.52	1.3956	4.04326e-07	2.12507e-06	-	-	-	gi|115469790|ref|NP_001058494.1|/4e-32/Os06g0702800 [Oryza sativa (japonica cultivar-group)] >gi|53791910|dbj|BAD54032.1| 3-phosphoinositide-dependent protein kinase-1-like [Oryza sativa Japonica Group] >gi|113596534|dbj|BAF20408.1| Os06g0702800 [Oryza sativa Japonica Group]
Unigene30515_Taxus	58	RawIntensity-ye	18.39	48.38	1.39549	1.62048e-11	1.42463e-10	-	-	-	gi|192766596|gb|ACF05947.1|/5e-10/MYC1 [Hevea brasiliensis]
Unigene33130_Taxus	215	RawIntensity-ye	68.18	179.31	1.39504	0	0	GO:0009570//chloroplast stroma	-	-	gi|226506150|ref|NP_001147441.1|/2e-28/cystathionin beta synthase protein [Zea mays] >gi|195611422|gb|ACG27541.1| cystathionin beta synthase protein [Zea mays]
Unigene18028_Taxus	57	RawIntensity-ye	18.08	47.51	1.39384	2.53652e-11	2.16338e-10	-	-	-	gi|115439161|ref|NP_001043860.1|/4e-27/Os01g0678700 [Oryza sativa (japonica cultivar-group)] >gi|29367575|gb|AAO72649.1| DP protein [Oryza sativa Japonica Group] >gi|113533391|dbj|BAF05774.1| Os01g0678700 [Oryza sativa Japonica Group]
Unigene19425_Taxus	96	RawIntensity-ye	30.44	79.95	1.39313	0	0	-	-	-	gi|115483106|ref|NP_001065146.1|/3e-60/Os10g0532100 [Oryza sativa (japonica cultivar-group)]
Unigene33904_Taxus	273	RawIntensity-ye	86.57	227.11	1.39145	1.16795e-13	1.35778e-12	-	-	-	gi|9795589|gb|AAF98407.1|AC024609_8/1e-05/Unknown protein [Arabidopsis thaliana]
Unigene21806_Taxus	866	RawIntensity-ye	274.61	719.86	1.39033	9.70112e-13	9.72598e-12	-	-	-	-
Unigene20613_Taxus	38	RawIntensity-ye	12.05	31.58	1.38998	6.08412e-08	3.61591e-07	-	-	-	gi|226531235|ref|NP_001151090.1|/2e-07/DNA-binding WRKY [Zea mays] >gi|195644210|gb|ACG41573.1| DNA-binding WRKY [Zea mays]
Unigene5466_Taxus	30	RawIntensity-ye	9.51	24.91	1.38921	1.57092e-06	7.68425e-06	-	-	-	gi|22330506|ref|NP_177040.2|/1e-09/zinc finger (DNL type) family protein [Arabidopsis thaliana] >gi|5734707|gb|AAD49972.1|AC008075_5 F24J5.3 [Arabidopsis thaliana]
Unigene33012_Taxus	93	RawIntensity-ye	29.49	77.06	1.38576	4.019e-14	5.08621e-13	-	-	-	gi|20257711|gb|AAM16021.1|/3e-13/glycine-rich RNA binding protein [Zea mays]
Unigene11456_Taxus	29	RawIntensity-ye	9.2	24.04	1.38573	2.47214e-06	1.16707e-05	-	-	-	-
Unigene16008_Taxus	29	RawIntensity-ye	9.2	24.04	1.38573	2.47214e-06	1.16676e-05	-	-	-	gi|226502272|ref|NP_001149525.1|/3e-06/ZIM motif family protein [Zea mays] >gi|195627786|gb|ACG35723.1| ZIM motif family protein [Zea mays]
Unigene33243_Taxus	36	RawIntensity-ye	11.42	29.84	1.38568	1.49668e-07	8.33103e-07	GO:0009536//plastid	GO:0004794//L-threonine ammonia-lyase activity;GO:0003700//sequence-specific DNA binding transcription factor activity	GO:0006355//regulation of transcription, DNA-dependent;GO:0009097//isoleucine biosynthetic process	gi|225556803|gb|EEH05091.1|/6e-21/threonine dehydratase [Ajellomyces capsulatus G186AR]
Unigene14546_Taxus	57	RawIntensity-ye	18.08	47.22	1.385	3.61892e-11	3.04897e-10	-	-	-	gi|30350275|gb|AAP23033.1|/1e-139/sphingolipid delta-8 desaturase [Primula farinosa]
Unigene20019_Taxus	28	RawIntensity-ye	8.88	23.17	1.38363	3.89254e-06	1.78608e-05	-	-	-	gi|115472301|ref|NP_001059749.1|/1e-19/Os07g0509700 [Oryza sativa (japonica cultivar-group)]
Unigene33448_Taxus	215	RawIntensity-ye	68.18	177.86	1.38332	0	0	-	GO:0030170//pyridoxal phosphate binding;GO:0016847//1-aminocyclopropane-1-carboxylate synthase activity;GO:0008483//transaminase activity	GO:0009058//biosynthetic process	gi|115451163|ref|NP_001049182.1|/3e-25/Os03g0183600 [Oryza sativa (japonica cultivar-group)]
Unigene4681_Taxus	226	RawIntensity-ye	71.67	186.84	1.38236	0	0	GO:0005886//plasma membrane	-	GO:0048367//shoot development	gi|12229654|sp|Q9LIK7.1|ACA13_ARATH/0.0/RecName: Full=Putative calcium-transporting ATPase 13, plasma membrane-type; AltName: Full=Ca(2+)-ATPase isoform 13 >gi|11994720|dbj|BAB03036.1| Ca2+-transporting ATPase-like protein [Arabidopsis thaliana]
Unigene7067_Taxus	27	RawIntensity-ye	8.56	22.31	1.38201	6.1328e-06	2.74337e-05	-	-	-	gi|116787730|gb|ABK24621.1|/2e-16/unknown [Picea sitchensis]
Unigene12577_Taxus	39	RawIntensity-ye	12.37	32.15	1.37797	5.54858e-08	3.30527e-07	-	-	-	gi|115444093|ref|NP_001045826.1|/0.0/Os02g0137000 [Oryza sativa (japonica cultivar-group)]
Unigene17038_Taxus	38	RawIntensity-ye	12.05	31.29	1.37667	8.69722e-08	5.01973e-07	-	-	-	gi|117557353|emb|CAL64987.1|/4e-08/NTMC2Type3.1 protein [Physcomitrella patens]
Unigene29952_Taxus	108	RawIntensity-ye	34.25	88.93	1.37657	0	0	-	-	-	gi|255676350|dbj|BAF17401.2|/2e-41/Os05g0401200 [Oryza sativa Japonica Group]
Unigene36229_Taxus	25	RawIntensity-ye	7.93	20.57	1.37515	1.52539e-05	6.31345e-05	-	-	-	gi|144225779|emb|CAM84286.1|/7e-71/abscisic insensitive 1B [Populus tremula]
Unigene13107_Taxus	49	RawIntensity-ye	15.54	40.27	1.37372	1.28096e-09	9.19879e-09	-	-	-	gi|115465833|ref|NP_001056516.1|/6e-12/Os05g0595500 [Oryza sativa (japonica cultivar-group)] >gi|113580067|dbj|BAF18430.1| Os05g0595500 [Oryza sativa Japonica Group]
Unigene8934_Taxus	128	RawIntensity-ye	40.59	105.15	1.37325	4.5075e-14	5.66855e-13	-	-	-	gi|226460951|gb|EEH58245.1|/2e-10/ubiquitin carrier protein [Micromonas pusilla CCMP1545]
Unigene10779_Taxus	18	RawIntensity-ye	5.71	14.77	1.37111	0.000265078	0.000875292	-	-	-	gi|226503461|ref|NP_001149624.1|/3e-65/methionine aminopeptidase 1A [Zea mays] >gi|195628586|gb|ACG36123.1| methionine aminopeptidase 1A [Zea mays]
Unigene14334_Taxus	102	RawIntensity-ye	32.34	83.43	1.36725	0	0	GO:0009536//plastid	GO:0016787//hydrolase activity	GO:0008152//metabolic process	gi|110289212|gb|ABG66125.1|/1e-10/HAD-superfamily hydrolase, subfamily IA, variant 3 containing protein, expressed [Oryza sativa (japonica cultivar-group)]
Unigene22489_Taxus	28	RawIntensity-ye	8.88	22.88	1.36546	5.57274e-06	2.5003e-05	-	-	-	-
Unigene15439_Taxus	39	RawIntensity-ye	12.37	31.86	1.3649	7.91524e-08	4.60235e-07	-	-	-	gi|50660455|gb|AAT80910.1|/0.0/GIGANTEA [Arabidopsis thaliana]
Unigene28636_Taxus	92	RawIntensity-ye	29.17	75.03	1.36298	5.9952e-15	8.1983e-14	-	-	-	-
Unigene5610_Taxus	26	RawIntensity-ye	8.24	21.15	1.35994	1.38391e-05	5.8067e-05	-	-	-	gi|21426126|gb|AAM52323.1|AC105363_12/3e-07/Putative serine/threonine protein kinase [Oryza sativa Japonica Group]
Unigene36405_Taxus	78	RawIntensity-ye	24.73	63.44	1.35913	0	0	-	-	-	gi|63054660|ref|NP_594819.2|/2e-06/GTPase activating protein [Schizosaccharomyces pombe] >gi|212288603|sp|Q9URY3.4|YLOH_SCHPO RecName: Full=TBC domain-containing protein C1952.17c
Unigene30491_Taxus	173	RawIntensity-ye	54.86	140.5	1.35674	3.42614e-13	3.64187e-12	-	-	-	gi|15223101|ref|NP_172868.1|/1e-16/integral membrane family protein [Arabidopsis thaliana] >gi|75215660|sp|Q9XI72.1|U4972_ARATH RecName: Full=UPF0497 membrane protein At1g14160 >gi|5080791|gb|AAD39301.1|AC007576_24 Hypothetical protein [Arabidopsis thaliana] >gi|30017253|gb|AAP12860.1| At1g14160 [Arabidopsis thaliana]
Unigene35618_Taxus	95	RawIntensity-ye	30.13	76.77	1.34934	5.9952e-15	8.20453e-14	-	-	-	gi|195624584|gb|ACG34122.1|/5e-48/ribonucleoprotein [Zea mays]
Unigene33348_Taxus	85	RawIntensity-ye	26.95	68.65	1.34897	0	0	GO:0031225//anchored to membrane	-	-	gi|226496515|ref|NP_001149513.1|/3e-06/blue copper protein [Zea mays] >gi|195627684|gb|ACG35672.1| blue copper protein precursor [Zea mays]
Unigene18720_Taxus	212	RawIntensity-ye	67.23	171.2	1.34851	0	0	-	-	-	gi|115470136|ref|NP_001058667.1|/3e-09/Os06g0731900 [Oryza sativa (japonica cultivar-group)] >gi|113596707|dbj|BAF20581.1| Os06g0731900 [Oryza sativa Japonica Group]
Unigene23983_Taxus	19	RawIntensity-ye	6.03	15.35	1.34801	0.00023958	0.000794304	-	-	-	-
Unigene26193_Taxus	65	RawIntensity-ye	20.61	52.43	1.34705	8.43548e-12	7.66304e-11	-	-	-	-
Unigene12400_Taxus	37	RawIntensity-ye	11.73	29.84	1.34704	2.76682e-07	1.49077e-06	-	-	-	gi|115474261|ref|NP_001060729.1|/4e-06/Os07g0693400 [Oryza sativa (japonica cultivar-group)]
Unigene34603_Taxus	262	RawIntensity-ye	83.08	211.18	1.3459	7.90478e-14	9.63131e-13	-	-	-	gi|115482790|ref|NP_001064988.1|/5e-13/Os10g0501900 [Oryza sativa (japonica cultivar-group)] >gi|78708867|gb|ABB47842.1| expressed protein [Oryza sativa (japonica cultivar-group)] >gi|113639597|dbj|BAF26902.1| Os10g0501900 [Oryza sativa Japonica Group]
Unigene30206_Taxus	32	RawIntensity-ye	10.15	25.78	1.34477	1.85144e-06	8.93019e-06	-	-	-	-
Unigene6819_Taxus	50	RawIntensity-ye	15.86	40.27	1.34431	2.35214e-09	1.64961e-08	-	-	-	gi|29028832|gb|AAO64795.1|/3e-30/At5g23920 [Arabidopsis thaliana]
Unigene18185_Taxus	27	RawIntensity-ye	8.56	21.73	1.34401	1.25282e-05	5.27508e-05	-	-	-	gi|186500120|ref|NP_001118301.1|/1e-111/MGDC; 1,2-diacylglycerol 3-beta-galactosyltransferase [Arabidopsis thaliana]
Unigene23726_Taxus	271	RawIntensity-ye	85.94	218.13	1.34379	0	0	-	-	-	-
Unigene20012_Taxus	45	RawIntensity-ye	14.27	36.21	1.3434	1.54576e-08	9.91359e-08	-	-	-	gi|117950167|gb|ABK58467.1|/5e-08/LIM domain protein WLIM1a [Populus tremula x Populus alba]
Unigene20461_Taxus	40	RawIntensity-ye	12.68	32.15	1.34226	1.02175e-07	5.84658e-07	-	-	-	-
Unigene31811_Taxus	84	RawIntensity-ye	26.64	67.5	1.34129	0	0	-	-	-	gi|270228596|emb|CBI17533.1|/4e-06/unnamed protein product [Vitis vinifera]
Unigene12993_Taxus	79	RawIntensity-ye	25.05	63.44	1.34058	0	0	-	-	-	gi|45720180|emb|CAG14981.1|/2e-77/C2 domain-containing protein [Cicer arietinum]
Unigene9342_Taxus	22	RawIntensity-ye	6.98	17.67	1.34	8.61e-05	0.000310948	-	-	-	gi|115471041|ref|NP_001059119.1|/1e-48/Os07g0196200 [Oryza sativa (japonica cultivar-group)] >gi|113610655|dbj|BAF21033.1| Os07g0196200 [Oryza sativa Japonica Group]
Unigene29512_Taxus	22	RawIntensity-ye	6.98	17.67	1.34	8.61e-05	0.000310886	-	-	-	-
Unigene18668_Taxus	86	RawIntensity-ye	27.27	68.94	1.33803	0	0	-	-	-	gi|148910293|gb|ABR18226.1|/2e-24/unknown [Picea sitchensis]
Unigene35251_Taxus	30	RawIntensity-ye	9.51	24.04	1.33792	4.57328e-06	2.07673e-05	-	-	-	-
Unigene19347_Taxus	59	RawIntensity-ye	18.71	47.22	1.33559	1.21749e-10	9.69035e-10	-	-	-	gi|224115568|ref|XP_002317068.1|/2e-88/jumonji domain protein [Populus trichocarpa] >gi|222860133|gb|EEE97680.1| jumonji domain protein [Populus trichocarpa]
Unigene35654_Taxus	21	RawIntensity-ye	6.66	16.8	1.33487	0.00013628	0.000469287	-	-	-	gi|11496177|gb|AAG36670.1|/5e-26/immunodominant antigen Gp43 [Paracoccidioides brasiliensis] >gi|11496179|gb|AAG36671.1| immunodominant antigen Gp43 [Paracoccidioides brasiliensis] >gi|225677969|gb|EEH16253.1| glucan 1,3-beta-glucosidase [Paracoccidioides brasiliensis Pb03]
Unigene23512_Taxus	21	RawIntensity-ye	6.66	16.8	1.33487	0.00013628	0.000469197	-	-	-	gi|115484543|ref|NP_001067415.1|/5e-07/Os11g0191400 [Oryza sativa (japonica cultivar-group)] >gi|75269717|sp|Q53NI2.1|NADK2_ORYSJ RecName: Full=Probable NAD kinase 2, chloroplastic; Flags: Precursor >gi|77549052|gb|ABA91849.1| ATP-NAD kinase family protein, expressed [Oryza sativa (japonica cultivar-group)] >gi|113644637|dbj|BAF27778.1| Os11g0191400 [Oryza sativa Japonica Group]
Unigene18455_Taxus	25	RawIntensity-ye	7.93	19.99	1.33389	3.11384e-05	0.000122191	-	-	-	gi|115436568|ref|NP_001043042.1|/6e-35/Os01g0367400 [Oryza sativa (japonica cultivar-group)] >gi|113532573|dbj|BAF04956.1| Os01g0367400 [Oryza sativa Japonica Group]
Unigene35101_Taxus	33	RawIntensity-ye	10.46	26.36	1.33347	1.67527e-06	8.12181e-06	-	-	-	gi|259480992|tpe|CBF74123.1|/5e-10/TPA: tRNA-guanine transglycosylase family protein (AFU_orthologue; AFUA_5G03470) [Aspergillus nidulans FGSC A4]
Unigene16147_Taxus	33	RawIntensity-ye	10.46	26.36	1.33347	1.67527e-06	8.11962e-06	-	-	-	-
Unigene35468_Taxus	185	RawIntensity-ye	58.66	147.74	1.33261	0	0	-	-	-	gi|75282265|sp|Q41593.1|SPZ1A_WHEAT/2e-53/RecName: Full=Serpin-Z1A; AltName: Full=TriaeZ1a; AltName: Full=WSZ1a; Short=WSZ1; AltName: Full=WSZCI >gi|871551|emb|CAA90071.1| serpin [Triticum aestivum]
Unigene4967_Taxus	43	RawIntensity-ye	13.64	34.18	1.32531	5.3522e-08	3.19357e-07	-	-	-	gi|15224174|ref|NP_179435.1|/3e-59/SDH1-2; succinate dehydrogenase [Arabidopsis thaliana] >gi|75216119|sp|Q9ZPX5.1|DHSA2_ARATH RecName: Full=Succinate dehydrogenase [ubiquinone] flavoprotein subunit 2, mitochondrial; AltName: Full=Flavoprotein subunit 2 of complex II; Short=FP; Flags: Precursor >gi|29028988|gb|AAO64873.1| At2g18450 [Arabidopsis thaliana]
Unigene27312_Taxus	43	RawIntensity-ye	13.64	34.18	1.32531	5.3522e-08	3.19252e-07	-	-	-	-
Unigene20162_Taxus	101	RawIntensity-ye	32.03	80.24	1.3249	0	0	-	-	-	gi|121699054|ref|XP_001267895.1|/1e-05/F-box domain protein [Aspergillus clavatus NRRL 1] >gi|119396037|gb|EAW06469.1| F-box domain protein [Aspergillus clavatus NRRL 1]
Unigene10728_Taxus	58	RawIntensity-ye	18.39	46.06	1.32459	2.67972e-10	2.06882e-09	-	-	-	gi|115446143|ref|NP_001046851.1|/7e-25/Os02g0481000 [Oryza sativa (japonica cultivar-group)] >gi|113536382|dbj|BAF08765.1| Os02g0481000 [Oryza sativa Japonica Group]
Unigene14127_Taxus	23	RawIntensity-ye	7.29	18.25	1.32391	7.76188e-05	0.000281505	-	-	-	-
Unigene30507_Taxus	23	RawIntensity-ye	7.29	18.25	1.32391	7.76188e-05	0.000281448	-	-	-	-
Unigene33824_Taxus	222	RawIntensity-ye	70.4	176.13	1.32299	0	0	-	-	-	-
Unigene16047_Taxus	38	RawIntensity-ye	12.05	30.13	1.32217	3.55016e-07	1.89132e-06	-	-	-	gi|261355641|gb|EEY18069.1|/2e-35/E3 ubiquitin-protein ligase SHPRH [Verticillium albo-atrum VaMs.102]
Unigene27481_Taxus	167	RawIntensity-ye	52.96	132.38	1.32171	1.53433e-13	1.72681e-12	-	-	-	gi|115477659|ref|NP_001062425.1|/5e-06/Os08g0547000 [Oryza sativa (japonica cultivar-group)] >gi|113624394|dbj|BAF24339.1| Os08g0547000 [Oryza sativa Japonica Group]
Unigene8054_Taxus	30	RawIntensity-ye	9.51	23.75	1.32041	6.49272e-06	2.89072e-05	-	-	-	gi|115462947|ref|NP_001055073.1|/2e-31/Os05g0275000 [Oryza sativa (japonica cultivar-group)] >gi|113578624|dbj|BAF16987.1| Os05g0275000 [Oryza sativa Japonica Group]
Unigene23236_Taxus	139	RawIntensity-ye	44.08	110.08	1.32036	1.49436e-13	1.68394e-12	-	-	-	-
Unigene30626_Taxus	120	RawIntensity-ye	38.05	95.02	1.32033	0	0	-	-	-	-
Unigene10103_Taxus	26	RawIntensity-ye	8.24	20.57	1.31983	2.80768e-05	0.000111711	-	-	-	gi|116058551|emb|CAL53740.1|/1e-10/DEAD-box protein abstrakt (ISS) [Ostreococcus tauri]
Unigene9269_Taxus	63	RawIntensity-ye	19.98	49.83	1.31846	5.8021e-11	4.76997e-10	-	-	-	gi|118411045|ref|YP_874440.1|/1e-158/preprotein translocase subunit A [Phaeodactylum tricornutum] >gi|166918842|sp|A0T0G5.1|SECA_PHATR RecName: Full=Protein translocase subunit secA >gi|116739792|gb|ABK20663.1| preprotein translocase subunit A [Phaeodactylum tricornutum]
Unigene32723_Taxus	55	RawIntensity-ye	17.44	43.45	1.31696	1.01482e-09	7.37885e-09	-	-	-	gi|85082342|ref|XP_956898.1|/5e-06/citrate synthase, mitochondrial precursor [Neurospora crassa OR74A] >gi|30316357|sp|P34085.2|CISY_NEUCR RecName: Full=Citrate synthase, mitochondrial; Flags: Precursor >gi|11268307|pir||T49379 citrate synthase, mitochondrial [imported] - Neurospora crassa >gi|7800823|emb|CAB91282.1| mitochondrial citrate synthase [Neurospora crassa] >gi|28917978|gb|EAA27662.1| c…
Unigene31825_Taxus	914	RawIntensity-ye	289.84	721.88	1.3165	0	0	-	-	-	-
Unigene15423_Taxus	58	RawIntensity-ye	18.39	45.77	1.31548	3.77818e-10	2.87129e-09	-	-	-	gi|226506504|ref|NP_001147828.1|/7e-09/LOC100281438 [Zea mays] >gi|195613986|gb|ACG28823.1| DNA binding protein [Zea mays]
Unigene2238_Taxus	47	RawIntensity-ye	14.9	37.08	1.31533	1.79113e-08	1.1414e-07	-	-	-	gi|159484664|ref|XP_001700374.1|/4e-08/component of the exocyst complex [Chlamydomonas reinhardtii] >gi|158272415|gb|EDO98216.1| component of the exocyst complex [Chlamydomonas reinhardtii]
Unigene4339_Taxus	25	RawIntensity-ye	7.93	19.7	1.3128	4.4262e-05	0.000168723	-	-	-	gi|115460436|ref|NP_001053818.1|/2e-62/Os04g0608900 [Oryza sativa (japonica cultivar-group)] >gi|27085280|gb|AAN84503.1| serine/threonine protein kinase [Oryza sativa Japonica Group] >gi|38567896|emb|CAE03651.2| OSJNBa0060N03.16 [Oryza sativa (japonica cultivar-group)] >gi|90265072|emb|CAH67745.1| H0702G05.4 [Oryza sativa (indica cultivar-group)] >gi|113565389|dbj|BAF15732.1| Os04g0608900 [Oryza …
Unigene8_Taxus	120	RawIntensity-ye	38.05	94.44	1.3115	0	0	-	-	-	gi|226492718|ref|NP_001151758.1|/7e-06/LOC100285393 [Zea mays] >gi|195649545|gb|ACG44240.1| acylamino-acid-releasing enzyme [Zea mays]
Unigene396_Taxus	28	RawIntensity-ye	8.88	22.02	1.31018	1.60564e-05	6.63643e-05	-	-	-	gi|77553819|gb|ABA96615.1|/3e-26/D-mannose binding lectin family protein, expressed [Oryza sativa (japonica cultivar-group)]
Unigene25874_Taxus	104	RawIntensity-ye	32.98	81.69	1.30857	0	0	-	-	-	-
Unigene27616_Taxus	31	RawIntensity-ye	9.83	24.33	1.30747	5.85114e-06	2.62064e-05	-	-	-	-
Unigene34264_Taxus	24	RawIntensity-ye	7.61	18.83	1.30706	6.9825e-05	0.000254676	-	-	-	gi|195626286|gb|ACG34973.1|/3e-15/F-box domain containing protein [Zea mays]
Unigene12013_Taxus	270	RawIntensity-ye	85.62	211.76	1.30641	3.7148e-13	3.93476e-12	-	-	-	gi|222424172|dbj|BAH20045.1|/3e-23/AT4G19160 [Arabidopsis thaliana]
Unigene34199_Taxus	75	RawIntensity-ye	23.78	58.81	1.30631	1.46061e-12	1.434e-11	-	-	-	gi|7715589|gb|AAF68107.1|AC010793_2/2e-13/F20B17.9 [Arabidopsis thaliana] >gi|15529238|gb|AAK97713.1| At1g79660/F20B17_9 [Arabidopsis thaliana] >gi|16974405|gb|AAL31128.1| At1g79660/F20B17_9 [Arabidopsis thaliana]
Unigene15612_Taxus	111	RawIntensity-ye	35.2	86.9	1.30378	0	0	-	-	-	gi|38567883|emb|CAD40900.2|/6e-91/OSJNBa0036B21.18 [Oryza sativa (japonica cultivar-group)]
Unigene34789_Taxus	377	RawIntensity-ye	119.55	294.9	1.30261	3.78808e-13	4.0053e-12	-	-	-	gi|83584321|gb|ABC24935.1|/5e-06/plastid 30S ribosomal protein S20 [Prototheca wickerhamii]
Unigene18018_Taxus	46	RawIntensity-ye	14.59	35.92	1.29981	3.93996e-08	2.37772e-07	-	-	-	-
Unigene28737_Taxus	1099	RawIntensity-ye	348.5	857.17	1.29842	2.73292e-12	2.61049e-11	-	-	-	-
Unigene16841_Taxus	120	RawIntensity-ye	38.05	93.57	1.29815	0	0	-	-	-	gi|15237514|ref|NP_198905.1|/0.0/ATCLC-A (CHLORIDE CHANNEL A); anion channel/ nitrate transmembrane transporter/ voltage-gated chloride channel [Arabidopsis thaliana] >gi|41688456|sp|P92941.2|CLCA_ARATH RecName: Full=Chloride channel protein CLC-a; Short=AtCLC-a >gi|2935344|gb|AAC05742.1| anion channel protein [Arabidopsis thaliana] >gi|10177968|dbj|BAB11351.1| anion channel protein [Arabidopsis …
Unigene4997_Taxus	126	RawIntensity-ye	39.96	98.2	1.29717	1.19016e-13	1.38003e-12	-	GO:0005515//protein binding	-	gi|226496385|ref|NP_001151386.1|/5e-88/pre-mRNA-splicing factor SF2 [Zea mays] >gi|195646352|gb|ACG42644.1| pre-mRNA-splicing factor SF2 [Zea mays]
Unigene18651_Taxus	38	RawIntensity-ye	12.05	29.55	1.29412	7.07208e-07	3.61869e-06	-	-	-	gi|115441809|ref|NP_001045184.1|/4e-21/Os01g0915000 [Oryza sativa (japonica cultivar-group)] >gi|113534715|dbj|BAF07098.1| Os01g0915000 [Oryza sativa Japonica Group]
Unigene27692_Taxus	38	RawIntensity-ye	12.05	29.55	1.29412	7.07208e-07	3.61766e-06	-	-	-	-
Unigene20555_Taxus	78	RawIntensity-ye	24.73	60.54	1.29163	1.05893e-12	1.05693e-11	-	-	-	gi|5815236|gb|AAD52610.1|/5e-93/splicing factor SR1B [Arabidopsis thaliana]
Unigene19550_Taxus	25	RawIntensity-ye	7.93	19.41	1.29141	6.2695e-05	0.000233982	-	-	-	gi|225680102|gb|EEH18386.1|/3e-45/fructose-bisphosphate aldolase [Paracoccidioides brasiliensis Pb03]
Unigene19858_Taxus	324	RawIntensity-ye	102.74	251.44	1.29122	0	0	-	-	-	-
Unigene19891_Taxus	28	RawIntensity-ye	8.88	21.73	1.29106	2.27042e-05	9.11816e-05	-	-	-	gi|226432463|gb|ACO55747.1|/5e-32/sucrose transporter [Panicum virgatum]
Unigene34147_Taxus	229	RawIntensity-ye	72.62	177	1.28531	2.65566e-13	2.88944e-12	-	-	-	gi|2970343|gb|AAC25986.1|/4e-06/tryptophan synthase beta [Chlamydomonas reinhardtii]
Unigene15977_Taxus	30	RawIntensity-ye	9.51	23.17	1.28474	1.29699e-05	5.45471e-05	-	-	-	gi|222424002|dbj|BAH19962.1|/1e-29/AT3G01980 [Arabidopsis thaliana]
Unigene12051_Taxus	36	RawIntensity-ye	11.42	27.81	1.28404	1.73203e-06	8.3857e-06	-	-	-	gi|115450437|ref|NP_001048819.1|/8e-06/Os03g0125700 [Oryza sativa (japonica cultivar-group)] >gi|108705952|gb|ABF93747.1| expressed protein [Oryza sativa (japonica cultivar-group)] >gi|113547290|dbj|BAF10733.1| Os03g0125700 [Oryza sativa Japonica Group]
Unigene11299_Taxus	38	RawIntensity-ye	12.05	29.26	1.2799	9.94506e-07	4.9825e-06	-	-	-	gi|49644821|emb|CAG98393.1|/3e-13/KLLA0F13442p [Kluyveromyces lactis]
Unigene28266_Taxus	26	RawIntensity-ye	8.24	19.99	1.27856	5.61976e-05	0.000211134	-	-	-	-
Unigene24104_Taxus	78	RawIntensity-ye	24.73	59.96	1.27774	2.18204e-12	2.10327e-11	-	-	-	-
Unigene9659_Taxus	52	RawIntensity-ye	16.49	39.98	1.27769	1.065e-08	6.92903e-08	-	-	-	gi|108862320|gb|ABA96146.2|/3e-24/ZF-HD protein dimerisation region containing protein, expressed [Oryza sativa (japonica cultivar-group)]
Unigene35431_Taxus	72	RawIntensity-ye	22.83	55.33	1.27713	1.63816e-11	1.43876e-10	-	-	-	gi|116310794|emb|CAH67585.1|/3e-09/OSIGBa0112M24.2 [Oryza sativa (indica cultivar-group)]
Unigene8682_Taxus	245	RawIntensity-ye	77.69	188	1.27493	3.73034e-13	3.94889e-12	-	-	-	gi|225430500|ref|XP_002285546.1|/2e-10/PREDICTED: hypothetical protein [Vitis vinifera] >gi|270231823|emb|CBI21148.1| unnamed protein product [Vitis vinifera]
Unigene19235_Taxus	85	RawIntensity-ye	26.95	65.18	1.27414	2.35812e-13	2.58131e-12	-	-	-	gi|115458670|ref|NP_001052935.1|/3e-06/Os04g0450000 [Oryza sativa (japonica cultivar-group)] >gi|21740708|emb|CAD40829.1| OSJNBa0086B14.1 [Oryza sativa (japonica cultivar-group)] >gi|113564506|dbj|BAF14849.1| Os04g0450000 [Oryza sativa Japonica Group] >gi|116310077|emb|CAH67098.1| H0818E04.15 [Oryza sativa (indica cultivar-group)]
Unigene33882_Taxus	48	RawIntensity-ye	15.22	36.79	1.27335	4.47886e-08	2.6948e-07	-	-	-	-
Unigene2163_Taxus	33	RawIntensity-ye	10.46	25.2	1.26854	6.65012e-06	2.95568e-05	-	-	-	gi|32482094|gb|AAP84400.1|/1e-132/FCA protein [Triticum aestivum]
Unigene30257_Taxus	125	RawIntensity-ye	39.64	95.31	1.26567	1.46549e-14	1.95646e-13	-	-	-	gi|50542930|ref|XP_499631.1|/2e-08/YALI0A00847p [Yarrowia lipolytica] >gi|49645496|emb|CAG83551.1| YALI0A00847p [Yarrowia lipolytica]
Unigene11650_Taxus	174	RawIntensity-ye	55.18	132.67	1.26562	1.19904e-13	1.38587e-12	-	-	-	gi|115475077|ref|NP_001061135.1|/6e-08/Os08g0179900 [Oryza sativa (japonica cultivar-group)] >gi|113623104|dbj|BAF23049.1| Os08g0179900 [Oryza sativa Japonica Group]
Unigene17293_Taxus	133	RawIntensity-ye	42.18	101.39	1.26528	1.06137e-13	1.2484e-12	-	-	-	gi|7767671|gb|AAF69168.1|AC007915_20/0.0/F27F5.22 [Arabidopsis thaliana]
Unigene13729_Taxus	27	RawIntensity-ye	8.56	20.57	1.26486	5.02964e-05	0.000190595	-	-	-	gi|115452831|ref|NP_001050016.1|/9e-46/Os03g0332400 [Oryza sativa (japonica cultivar-group)] >gi|113548487|dbj|BAF11930.1| Os03g0332400 [Oryza sativa Japonica Group]
Unigene18090_Taxus	154	RawIntensity-ye	48.83	117.32	1.26461	1.90958e-13	2.11867e-12	-	-	-	gi|254798687|ref|YP_003058304.1|/2e-56/translational elongation factor Tu [Parachlorella kessleri] >gi|229915635|gb|ACQ90978.1| translational elongation factor Tu [Parachlorella kessleri]
Unigene22742_Taxus	24	RawIntensity-ye	7.61	18.25	1.26193	0.000139405	0.000478583	-	-	-	-
Unigene34246_Taxus	37	RawIntensity-ye	11.73	28.1	1.26037	2.18022e-06	1.03742e-05	-	-	-	gi|226968557|ref|YP_002808510.1|/1e-45/large subunit ribosomal protein 5 [Micromonas pusilla CCMP1545] >gi|226348852|gb|ACO50755.1| large subunit ribosomal protein 5 [Micromonas pusilla CCMP1545]
Unigene17063_Taxus	34	RawIntensity-ye	10.78	25.78	1.2579	5.9554e-06	2.666e-05	-	-	-	gi|13129479|gb|AAK13137.1|AC083945_12/5e-06/Hypothetical protein [Oryza sativa Japonica Group]
Unigene12112_Taxus	44	RawIntensity-ye	13.95	33.31	1.25569	2.64252e-07	1.43022e-06	-	-	-	-
Unigene18145_Taxus	88	RawIntensity-ye	27.91	66.63	1.25539	3.0953e-13	3.32357e-12	-	-	-	gi|549975|gb|AAA50234.1|/7e-90/nucleosome assembly protein I-like protein; similar to mouse nap I, PIR Accession Number JS0707 [Arabidopsis thaliana]
Unigene31386_Taxus	85	RawIntensity-ye	26.95	64.31	1.25476	7.2986e-13	7.44168e-12	-	-	-	gi|226495585|ref|NP_001147971.1|/2e-07/smr domain containing protein [Zea mays] >gi|195614920|gb|ACG29290.1| smr domain containing protein [Zea mays]
Unigene30118_Taxus	23	RawIntensity-ye	7.29	17.38	1.25344	0.000219762	0.000735236	-	-	-	-
Unigene25994_Taxus	66	RawIntensity-ye	20.93	49.83	1.25144	3.19724e-10	2.45049e-09	-	-	-	-
Unigene13488_Taxus	71	RawIntensity-ye	22.51	53.59	1.2514	6.89388e-11	5.63663e-10	-	-	-	gi|115466856|ref|NP_001057027.1|/6e-19/Os06g0191200 [Oryza sativa (japonica cultivar-group)]
Unigene32054_Taxus	53	RawIntensity-ye	16.81	39.98	1.24996	1.86539e-08	1.18662e-07	-	-	-	-
Unigene23673_Taxus	68	RawIntensity-ye	21.56	51.27	1.24976	1.85022e-10	1.44642e-09	-	-	-	-
Unigene5008_Taxus	55	RawIntensity-ye	17.44	41.42	1.24793	1.07563e-08	6.99061e-08	-	-	-	gi|242213272|ref|XP_002472465.1|/2e-50/N-acetylhexosaminidase [Postia placenta Mad-698-R] >gi|220728447|gb|EED82341.1| N-acetylhexosaminidase [Postia placenta Mad-698-R]
Unigene33961_Taxus	25	RawIntensity-ye	7.93	18.83	1.24764	0.000124425	0.000433778	-	-	-	gi|162459853|ref|NP_001105730.1|/6e-06/origin recognition complex subunit 3 [Zea mays] >gi|15866779|gb|AAL10454.1|AF417483_1 origin recognition complex subunit 3 [Zea mays]
Unigene35632_Taxus	92	RawIntensity-ye	29.17	69.23	1.24691	1.42997e-13	1.62563e-12	-	-	-	gi|226505306|ref|NP_001149786.1|/1e-31/RHC1A [Zea mays] >gi|195634655|gb|ACG36796.1| RHC1A [Zea mays]
Unigene11651_Taxus	67	RawIntensity-ye	21.25	50.4	1.24596	2.86812e-10	2.20576e-09	-	-	-	gi|108706484|gb|ABF94279.1|/1e-145/copper-translocating P-type ATPase family protein, expressed [Oryza sativa (japonica cultivar-group)]
Unigene28201_Taxus	104	RawIntensity-ye	32.98	78.21	1.24576	0	0	-	-	-	-
Unigene30097_Taxus	308	RawIntensity-ye	97.67	231.46	1.24478	0	0	-	-	-	-
Unigene21350_Taxus	32	RawIntensity-ye	10.15	24.04	1.24396	1.45908e-05	6.05571e-05	-	-	-	gi|255070899|ref|XP_002507531.1|/2e-26/phosphatidic acid phosphatase-related protein [Micromonas sp. RCC299] >gi|226522806|gb|ACO68789.1| phosphatidic acid phosphatase-related protein [Micromonas sp. RCC299]
Unigene577_Taxus	75	RawIntensity-ye	23.78	56.2	1.24082	3.2027e-11	2.71483e-10	-	-	-	gi|42562146|ref|NP_173268.2|/5e-10/mitochondrial import inner membrane translocase subunit Tim17/Tim22/Tim23 family protein [Arabidopsis thaliana]
Unigene19502_Taxus	46	RawIntensity-ye	14.59	34.47	1.24036	2.11836e-07	1.16084e-06	-	-	-	gi|255716974|ref|XP_002554768.1|/2e-08/KLTH0F13332p [Lachancea thermotolerans] >gi|238936151|emb|CAR24331.1| KLTH0F13332p [Lachancea thermotolerans]
Unigene14881_Taxus	29	RawIntensity-ye	9.2	21.73	1.23998	4.01262e-05	0.000153608	-	-	-	gi|160899032|ref|YP_001564614.1|/4e-33/NUDIX hydrolase [Delftia acidovorans SPH-1] >gi|160364616|gb|ABX36229.1| NUDIX hydrolase [Delftia acidovorans SPH-1]
Unigene16231_Taxus	60	RawIntensity-ye	19.03	44.9	1.23844	3.20744e-09	2.21834e-08	-	-	-	gi|199433861|emb|CAG90119.2|/4e-12/DEHA2G02948p [Debaryomyces hansenii]
Unigene28673_Taxus	170	RawIntensity-ye	53.91	127.17	1.23813	3.37952e-13	3.59869e-12	-	-	-	-
Unigene26472_Taxus	212	RawIntensity-ye	67.23	158.46	1.23694	0	0	-	-	-	-
Unigene35182_Taxus	50	RawIntensity-ye	15.86	37.37	1.23649	7.00758e-08	4.11984e-07	-	-	-	gi|225678864|gb|EEH17148.1|/2e-33/glutamine amidotransferase subunit pdxT [Paracoccidioides brasiliensis Pb03]
Unigene31408_Taxus	102	RawIntensity-ye	32.34	76.19	1.23628	0	0	-	-	-	gi|159463778|ref|XP_001690119.1|/4e-09/acetyl-coa biotin carboxyl carrier [Chlamydomonas reinhardtii] >gi|158284107|gb|EDP09857.1| acetyl-coa biotin carboxyl carrier [Chlamydomonas reinhardtii]
Unigene34584_Taxus	160	RawIntensity-ye	50.74	119.06	1.23049	6.4393e-14	7.96437e-13	-	-	-	gi|28372878|gb|AAO39921.1|/4e-06/At4g37445 [Arabidopsis thaliana]
Unigene27412_Taxus	44	RawIntensity-ye	13.95	32.73	1.23035	5.13172e-07	2.67372e-06	-	-	-	-
Unigene31261_Taxus	74	RawIntensity-ye	23.47	55.04	1.22966	6.902e-11	5.64071e-10	-	-	-	-
Unigene26689_Taxus	23	RawIntensity-ye	7.29	17.09	1.22916	0.000308432	0.000999198	-	-	-	-
Unigene28072_Taxus	69	RawIntensity-ye	21.88	51.27	1.2285	3.19472e-10	2.4496e-09	-	-	-	-
Unigene14907_Taxus	32	RawIntensity-ye	10.15	23.75	1.22645	2.03722e-05	8.29265e-05	-	-	-	gi|226495585|ref|NP_001147971.1|/1e-06/smr domain containing protein [Zea mays] >gi|195614920|gb|ACG29290.1| smr domain containing protein [Zea mays]
Unigene15846_Taxus	50	RawIntensity-ye	15.86	37.08	1.22525	9.73462e-08	5.58267e-07	-	-	-	-
Unigene25091_Taxus	34	RawIntensity-ye	10.78	25.2	1.22507	1.1617e-05	4.94115e-05	-	-	-	-
Unigene10515_Taxus	36	RawIntensity-ye	11.42	26.65	1.22257	6.63314e-06	2.94886e-05	-	-	-	gi|730142|sp|P39866.1|NIA2_PHAVU/0.0/RecName: Full=Nitrate reductase [NADH] 2; Short=NR-2 >gi|392992|gb|AAA95940.1| nitrate reductase [Phaseolus vulgaris]
Unigene9884_Taxus	80	RawIntensity-ye	25.37	59.09	1.21979	1.84104e-11	1.60598e-10	-	-	-	gi|168053951|ref|XP_001779397.1|/3e-12/predicted protein [Physcomitrella patens subsp. patens] >gi|162669195|gb|EDQ55787.1| predicted protein [Physcomitrella patens subsp. patens]
Unigene31304_Taxus	33	RawIntensity-ye	10.46	24.33	1.21785	1.81492e-05	7.43483e-05	-	-	-	gi|85068588|gb|ABC69374.1|/4e-21/CYP82M1v3 [Nicotiana tabacum]
Unigene8073_Taxus	55	RawIntensity-ye	17.44	40.56	1.21766	2.87962e-08	1.77715e-07	-	-	-	gi|115449185|ref|NP_001048372.1|/1e-41/Os02g0793900 [Oryza sativa (japonica cultivar-group)] >gi|113537903|dbj|BAF10286.1| Os02g0793900 [Oryza sativa Japonica Group]
Unigene32074_Taxus	35	RawIntensity-ye	11.1	25.78	1.21569	1.03514e-05	4.43215e-05	-	-	-	-
Unigene17761_Taxus	111	RawIntensity-ye	35.2	81.69	1.21458	0	0	-	-	-	-
Unigene16206_Taxus	74	RawIntensity-ye	23.47	54.46	1.21438	1.32063e-10	1.04881e-09	-	-	-	gi|71001090|ref|XP_755226.1|/6e-25/GDSL Lipase/Acylhydrolase family protein [Aspergillus fumigatus Af293] >gi|66852864|gb|EAL93188.1| GDSL Lipase/Acylhydrolase family protein [Aspergillus fumigatus Af293] >gi|159129313|gb|EDP54427.1| GDSL Lipase/Acylhydrolase family protein [Aspergillus fumigatus A1163]
Unigene16862_Taxus	26	RawIntensity-ye	8.24	19.12	1.21437	0.000154945	0.000527905	-	-	-	gi|6320314|ref|NP_010394.1|/4e-96/Putative kinase [Saccharomyces cerevisiae] >gi|74627204|sp|Q04585.1|YDR09_YEAST RecName: Full=Uncharacterized sugar kinase YDR109C >gi|285811131|tpg|DAA11955.1| TPA: Putative kinase [Saccharomyces cerevisiae]
Unigene18447_Taxus	28	RawIntensity-ye	8.88	20.57	1.21191	8.7802e-05	0.000316587	-	-	-	gi|193788742|gb|ACF20470.1|/7e-53/At4g12840 [Arabidopsis thaliana]
Unigene16210_Taxus	30	RawIntensity-ye	9.51	22.02	1.2113	4.98536e-05	0.000189036	-	-	-	gi|608671|emb|CAA54631.1|/0.0/amino acid transporter [Arabidopsis thaliana]
Unigene17797_Taxus	60	RawIntensity-ye	19.03	44.03	1.21021	8.53328e-09	5.652e-08	-	-	-	gi|15230063|ref|NP_187240.1|/2e-18/RCI2B (RARE-COLD-INDUCIBLE 2B) [Arabidopsis thaliana] >gi|15214252|sp|Q9ZNS6.1|RCI2B_ARATH RecName: Full=Hydrophobic protein RCI2B; AltName: Full=Low temperature and salt-responsive protein LTI6B >gi|6671968|gb|AAF23227.1|AC013454_14 low temperature and salt responsive protein (LTI6B) [Arabidopsis thaliana] >gi|13957673|gb|AAK50618.1|AF264749_1 hydrophobic prote…
Unigene23819_Taxus	225	RawIntensity-ye	71.35	164.83	1.20799	0	0	-	-	-	-
Unigene32063_Taxus	38	RawIntensity-ye	12.05	27.81	1.20657	5.26418e-06	2.36954e-05	-	-	-	gi|226501114|ref|NP_001148298.1|/1e-10/PGPS/D12 [Zea mays] >gi|195617238|gb|ACG30449.1| PGPS/D12 [Zea mays]
Unigene4558_Taxus	1133	RawIntensity-ye	359.28	829.07	1.20639	2.3983e-12	2.30431e-11	-	GO:0003824//catalytic activity	GO:0008152//metabolic process	gi|42570875|ref|NP_973511.1|/3e-47/NIC1 (NICOTINAMIDASE 1); catalytic/ nicotinamidase [Arabidopsis thaliana]
Unigene10672_Taxus	288	RawIntensity-ye	91.33	210.6	1.20534	0	0	-	-	-	gi|225684760|gb|EEH23044.1|/1e-84/urease accessory protein ureG [Paracoccidioides brasiliensis Pb03]
Unigene28060_Taxus	25	RawIntensity-ye	7.93	18.25	1.2025	0.000243234	0.000806121	-	-	-	-
Unigene18043_Taxus	25	RawIntensity-ye	7.93	18.25	1.2025	0.000243234	0.000805973	-	-	-	-
Unigene10984_Taxus	25	RawIntensity-ye	7.93	18.25	1.2025	0.000243234	0.000805825	-	-	-	gi|115471929|ref|NP_001059563.1|/4e-19/Os07g0457300 [Oryza sativa (japonica cultivar-group)] >gi|113611099|dbj|BAF21477.1| Os07g0457300 [Oryza sativa Japonica Group]
Unigene35692_Taxus	122	RawIntensity-ye	38.69	88.93	1.20071	7.59392e-14	9.28398e-13	-	-	-	gi|157849694|gb|ABV89630.1|/1e-48/aluminum-induced protein-like protein [Brassica rapa]
Unigene27214_Taxus	205	RawIntensity-ye	65.01	149.19	1.19842	4.2344e-13	4.44328e-12	-	-	-	-
Unigene13536_Taxus	45	RawIntensity-ye	14.27	32.73	1.19763	8.79258e-07	4.42977e-06	-	-	-	gi|30693221|ref|NP_174791.2|/1e-162/CINV1 (cytosolic invertase 1); beta-fructofuranosidase [Arabidopsis thaliana] >gi|30693225|ref|NP_849750.1| CINV1 (cytosolic invertase 1); beta-fructofuranosidase [Arabidopsis thaliana] >gi|8778348|gb|AAF79356.1|AC007887_15 F15O4.33 [Arabidopsis thaliana]
Unigene16229_Taxus	71	RawIntensity-ye	22.51	51.56	1.19569	6.71312e-10	4.988e-09	-	-	-	-
Unigene31142_Taxus	30	RawIntensity-ye	9.51	21.73	1.19217	6.92368e-05	0.000252889	-	-	-	-
Unigene35028_Taxus	40	RawIntensity-ye	12.68	28.97	1.192	4.1655e-06	1.90019e-05	-	-	-	gi|83817206|gb|ABC47654.1|/5e-42/salutaridine reductase [Papaver somniferum]
Unigene1497_Taxus	76	RawIntensity-ye	24.1	55.04	1.19145	1.99805e-10	1.5586e-09	-	-	-	gi|224115892|ref|XP_002332083.1|/8e-84/cinnamoyl CoA reductase [Populus trichocarpa] >gi|222831969|gb|EEE70446.1| cinnamoyl CoA reductase [Populus trichocarpa]
Unigene21979_Taxus	180	RawIntensity-ye	57.08	130.36	1.19144	2.94432e-13	3.17281e-12	-	-	-	-
Unigene16922_Taxus	90	RawIntensity-ye	28.54	65.18	1.19144	4.19042e-12	3.93379e-11	-	-	-	gi|195657329|gb|ACG48132.1|/2e-96/transposon protein [Zea mays]
Unigene11840_Taxus	32	RawIntensity-ye	10.15	23.17	1.19078	3.93462e-05	0.000150879	GO:0009536//plastid	-	-	gi|114152868|sp|P47910.2|RR31_SPIOL/5e-14/RecName: Full=30S ribosomal protein S31, chloroplastic; AltName: Full=Plastid-specific 30S ribosomal protein 4; Short=PSRP-4; Flags: Precursor >gi|7578854|gb|AAF64154.1|AF236825_1 plastid-specific ribosomal protein 4 precursor [Spinacia oleracea]
Unigene8749_Taxus	225	RawIntensity-ye	71.35	162.8	1.19012	0	0	-	-	-	-
Unigene17777_Taxus	115	RawIntensity-ye	36.47	83.14	1.18883	0	0	-	-	-	gi|255673076|dbj|BAF04554.2|/8e-41/Os01g0259600 [Oryza sativa Japonica Group]
Unigene34222_Taxus	71	RawIntensity-ye	22.51	51.27	1.18755	9.23522e-10	6.78632e-09	-	-	-	gi|90399136|emb|CAJ86160.1|/2e-12/H0913C04.1 [Oryza sativa (indica cultivar-group)]
Unigene17941_Taxus	65	RawIntensity-ye	20.61	46.93	1.18717	4.8062e-09	3.26386e-08	-	-	-	gi|57222138|gb|AAW38976.1|/1e-06/At5g24890 [Arabidopsis thaliana] >gi|71143086|gb|AAZ23934.1| At5g24890 [Arabidopsis thaliana]
Unigene18320_Taxus	134	RawIntensity-ye	42.49	96.75	1.18714	0	0	-	-	-	gi|283794873|ref|YP_003359226.1|/3e-24/sulfate ABC transporter protein [Cryptomonas paramecium] >gi|253981845|gb|ACT46762.1| sulfate ABC transporter protein [Cryptomonas paramecium]
Unigene8412_Taxus	27	RawIntensity-ye	8.56	19.41	1.18112	0.000191033	0.000644512	-	-	-	gi|226506724|ref|NP_001151086.1|/5e-63/serine/threonine protein kinase [Zea mays] >gi|195644184|gb|ACG41560.1| serine/threonine protein kinase [Zea mays]
Unigene18609_Taxus	160	RawIntensity-ye	50.74	115	1.18044	6.4393e-14	7.96985e-13	-	-	-	gi|242788227|ref|XP_002481176.1|/4e-42/CobW domain protein [Talaromyces stipitatus ATCC 10500] >gi|218721323|gb|EED20742.1| CobW domain protein [Talaromyces stipitatus ATCC 10500]
Unigene35470_Taxus	82	RawIntensity-ye	26	58.81	1.17755	7.27476e-11	5.92919e-10	-	-	-	gi|269101041|ref|YP_003289189.1|/1e-34/30S ribosomal protein S5 [Ectocarpus siliculosus] >gi|266631549|emb|CAV31220.1| Chloroplast 30S ribosomal protein S5 [Ectocarpus siliculosus] >gi|270118679|emb|CAT18742.1| Chloroplast 30S ribosomal protein S5 [Ectocarpus siliculosus]
Unigene3593_Taxus	78	RawIntensity-ye	24.73	55.91	1.17684	2.17606e-10	1.69379e-09	-	-	-	gi|6323962|ref|NP_014033.1|/8e-30/Ubiquitin-specific protease that may play a role in ubiquitin precursor processing [Saccharomyces cerevisiae] >gi|1717871|sp|P50101.1|UBP15_YEAST RecName: Full=Ubiquitin carboxyl-terminal hydrolase 15; AltName: Full=Ubiquitin thioesterase 15; AltName: Full=Ubiquitin-specific-processing protease 15; AltName: Full=Deubiquitinating enzyme 15 >gi|285814310|tpg|DAA102…
Unigene27818_Taxus	36	RawIntensity-ye	11.42	25.78	1.17469	1.76383e-05	7.23708e-05	-	-	-	-
Unigene16103_Taxus	98	RawIntensity-ye	31.08	70.1	1.17343	1.25921e-12	1.24101e-11	-	-	-	gi|150864751|ref|XP_001383718.2|/2e-33/Platinum sensitivity protein [Pichia stipitis CBS 6054] >gi|149386007|gb|ABN65689.2| Platinum sensitivity protein [Pichia stipitis CBS 6054]
Unigene32119_Taxus	109	RawIntensity-ye	34.56	77.92	1.17289	2.4647e-14	3.20714e-13	-	-	-	-
Unigene20673_Taxus	30	RawIntensity-ye	9.51	21.44	1.17279	9.58298e-05	0.000343879	-	-	-	gi|8778274|gb|AAF79283.1|AC068602_6/1e-14/F14D16.9 [Arabidopsis thaliana]
Unigene13420_Taxus	62	RawIntensity-ye	19.66	44.32	1.17269	1.76795e-08	1.12743e-07	-	-	-	-
Unigene19921_Taxus	55	RawIntensity-ye	17.44	39.11	1.16514	1.4308e-07	7.99895e-07	-	-	-	gi|74636542|sp|Q6CL17.1|VPS27_KLULA/9e-09/RecName: Full=Vacuolar protein sorting-associated protein 27 >gi|49644508|emb|CAG98080.1| KLLA0F06446p [Kluyveromyces lactis]
Unigene21439_Taxus	307	RawIntensity-ye	97.35	218.13	1.16394	0	0	-	-	-	gi|118575171|sp|Q2H720.1|DBP2_CHAGB/0.0/RecName: Full=ATP-dependent RNA helicase DBP2
Unigene21124_Taxus	137	RawIntensity-ye	43.44	97.33	1.16386	2.78444e-13	3.02224e-12	-	-	-	-
Unigene35417_Taxus	31	RawIntensity-ye	9.83	22.02	1.16355	8.48172e-05	0.0003065	-	-	-	gi|238841313|gb|EEQ30975.1|/4e-16/protein transport protein GOS1 [Microsporum canis CBS 113480]
Unigene16934_Taxus	98	RawIntensity-ye	31.08	69.52	1.16144	2.35212e-12	2.26115e-11	-	-	-	gi|119866032|gb|ABM05486.1|/2e-66/ABC transporter 1-like protein [Rhodiola fastigiata]
Unigene32942_Taxus	27	RawIntensity-ye	8.56	19.12	1.1594	0.00026423	0.000872652	-	-	-	gi|197306844|gb|ACH59773.1|/4e-06/cold regulated plasma membrane protein [Pseudotsuga menziesii]
Unigene33526_Taxus	54	RawIntensity-ye	17.12	38.24	1.1594	2.20914e-07	1.20801e-06	-	-	-	-
Unigene18539_Taxus	45	RawIntensity-ye	14.27	31.86	1.15876	2.29608e-06	1.08967e-05	-	-	-	gi|22773244|gb|AAN06850.1|/1e-16/Hypothetical protein [Oryza sativa Japonica Group]
Unigene4852_Taxus	168	RawIntensity-ye	53.27	118.77	1.15678	1.18794e-13	1.37923e-12	-	GO:0003700//sequence-specific DNA binding transcription factor activity	GO:0045449//regulation of transcription	gi|73811199|gb|AAZ86536.1|/5e-10/truncated COL1 [Lolium perenne]
Unigene20272_Taxus	108	RawIntensity-ye	34.25	76.19	1.1535	1.94955e-13	2.1577e-12	-	-	-	gi|227202814|dbj|BAH56880.1|/3e-24/AT1G43580 [Arabidopsis thaliana]
Unigene28043_Taxus	30	RawIntensity-ye	9.51	21.15	1.15314	0.000132177	0.0004592	-	-	-	-
Unigene5820_Taxus	122	RawIntensity-ye	38.69	86.04	1.15305	8.4377e-14	1.0239e-12	-	-	-	gi|255674734|dbj|BAF12648.2|/6e-21/Os03g0639200 [Oryza sativa Japonica Group]
Unigene15126_Taxus	53	RawIntensity-ye	16.81	37.37	1.15256	3.40984e-07	1.82196e-06	-	-	-	gi|149389051|gb|EAZ63080.2|/1e-42/phospholipase D [Pichia stipitis CBS 6054]
Unigene34892_Taxus	222	RawIntensity-ye	70.4	156.43	1.15187	0	0	-	-	-	gi|116790054|gb|ABK25485.1|/5e-07/unknown [Picea sitchensis]
Unigene20355_Taxus	224	RawIntensity-ye	71.03	157.59	1.14968	1.64091e-13	1.83643e-12	-	-	-	gi|115436680|ref|NP_001043098.1|/2e-06/Os01g0384800 [Oryza sativa (japonica cultivar-group)] >gi|113532629|dbj|BAF05012.1| Os01g0384800 [Oryza sativa Japonica Group]
Unigene14213_Taxus	35	RawIntensity-ye	11.1	24.62	1.14927	3.7736e-05	0.0001462	-	-	-	gi|224143196|ref|XP_002336005.1|/1e-176/amino acid permease [Populus trichocarpa] >gi|222838437|gb|EEE76802.1| amino acid permease [Populus trichocarpa]
Unigene15801_Taxus	113	RawIntensity-ye	35.83	79.37	1.14743	3.05756e-13	3.28893e-12	-	-	-	-
Unigene16334_Taxus	64	RawIntensity-ye	20.29	44.9	1.14595	2.61018e-08	1.62199e-07	-	-	-	gi|115487600|ref|NP_001066287.1|/2e-06/Os12g0174300 [Oryza sativa (japonica cultivar-group)] >gi|113648794|dbj|BAF29306.1| Os12g0174300 [Oryza sativa Japonica Group]
Unigene7844_Taxus	327	RawIntensity-ye	103.69	228.85	1.14213	6.42376e-13	6.59076e-12	-	-	-	gi|90265102|emb|CAH67715.1|/3e-14/H0512B01.10 [Oryza sativa (indica cultivar-group)]
Unigene18436_Taxus	41	RawIntensity-ye	13	28.68	1.14153	9.61046e-06	4.13163e-05	-	-	-	gi|38344482|emb|CAE05497.2|/4e-27/OSJNBa0022H21.17 [Oryza sativa (japonica cultivar-group)] >gi|255675552|dbj|BAF14991.2| Os04g0476000 [Oryza sativa Japonica Group]
Unigene5904_Taxus	56	RawIntensity-ye	17.76	39.11	1.13891	2.37408e-07	1.29388e-06	-	-	-	gi|159479596|ref|XP_001697876.1|/1e-29/CPLD51 protein required for cyt b6 assembly [Chlamydomonas reinhardtii] >gi|145308398|gb|ABP57441.1| CCB1 [Chlamydomonas reinhardtii] >gi|158273974|gb|EDO99759.1| CPLD51 protein required for cyt b6 assembly [Chlamydomonas reinhardtii]
Unigene27129_Taxus	76	RawIntensity-ye	24.1	53.01	1.13723	1.79207e-09	1.27269e-08	-	-	-	-
Unigene35628_Taxus	123	RawIntensity-ye	39	85.75	1.13666	0	0	-	-	-	gi|116792458|gb|ABK26374.1|/4e-06/unknown [Picea sitchensis]
Unigene18740_Taxus	64	RawIntensity-ye	20.29	44.61	1.1366	3.5589e-08	2.17695e-07	-	-	-	gi|240276138|gb|EER39650.1|/2e-35/DUF255 domain-containing protein [Ajellomyces capsulatus H143]
Unigene20566_Taxus	32	RawIntensity-ye	10.15	22.31	1.13621	0.000103081	0.000367481	-	-	-	-
Unigene31347_Taxus	86	RawIntensity-ye	27.27	59.67	1.12969	2.14184e-10	1.66787e-09	-	-	-	gi|195611864|gb|ACG27762.1|/4e-15/MYND finger family protein [Zea mays]
Unigene10680_Taxus	162	RawIntensity-ye	51.37	112.4	1.12964	0	0	-	-	-	gi|115459622|ref|NP_001053411.1|/4e-15/Os04g0533900 [Oryza sativa (japonica cultivar-group)]
Unigene80_Taxus	33	RawIntensity-ye	10.46	22.88	1.1292	9.09622e-05	0.000327129	-	-	-	gi|226533000|ref|NP_001150929.1|/2e-06/LOC100284562 [Zea mays] >gi|195643028|gb|ACG40982.1| cell division cycle 2-like protein kinase 6 [Zea mays]
Unigene32737_Taxus	33	RawIntensity-ye	10.46	22.88	1.1292	9.09622e-05	0.000327064	-	-	-	gi|226500098|ref|NP_001148980.1|/1e-43/LOC100282600 [Zea mays] >gi|195623750|gb|ACG33705.1| transmembrane 9 superfamily protein member 1 precursor [Zea mays]
Unigene21173_Taxus	33	RawIntensity-ye	10.46	22.88	1.1292	9.09622e-05	0.000326999	-	-	-	gi|187471054|sp|A5DTS1.1|DUS3_LODEL/2e-88/RecName: Full=tRNA-dihydrouridine synthase 3
Unigene32133_Taxus	84	RawIntensity-ye	26.64	58.23	1.12817	3.70308e-10	2.8154e-09	-	-	-	-
Unigene36142_Taxus	64	RawIntensity-ye	20.29	44.32	1.12719	4.84376e-08	2.90561e-07	-	-	-	gi|62899671|sp|O43035.1|ATG3_SCHPO/3e-40/RecName: Full=Autophagy-related protein 3; AltName: Full=Autophagy-related E2-like conjugation enzyme atg3
Unigene15208_Taxus	72	RawIntensity-ye	22.83	49.83	1.12608	7.30056e-09	4.87861e-08	-	-	-	gi|116061162|emb|CAL56550.1|/1e-11/K+-channel ERG and related proteins, contain PAS/PAC sensor domain (ISS) [Ostreococcus tauri]
Unigene32146_Taxus	36	RawIntensity-ye	11.42	24.91	1.12516	4.568e-05	0.00017376	-	-	-	-
Unigene35461_Taxus	67	RawIntensity-ye	21.25	46.35	1.12511	2.47366e-08	1.54088e-07	-	-	-	gi|224090238|ref|XP_002308958.1|/2e-18/calcium dependent protein kinase 8 [Populus trichocarpa] >gi|222854934|gb|EEE92481.1| calcium dependent protein kinase 8 [Populus trichocarpa]
Unigene3677_Taxus	31	RawIntensity-ye	9.83	21.44	1.12504	0.000160167	0.000544975	-	-	-	gi|108706828|gb|ABF94623.1|/2e-10/expressed protein [Oryza sativa (japonica cultivar-group)]
Unigene21351_Taxus	124	RawIntensity-ye	39.32	85.75	1.12487	1.80078e-13	2.00786e-12	-	-	-	gi|121308607|dbj|BAF43699.1|/1e-61/PERK1-like protein kinase [Nicotiana tabacum]
Unigene10023_Taxus	438	RawIntensity-ye	138.89	302.72	1.12404	7.72716e-13	7.84752e-12	-	-	-	gi|20799112|dbj|BAB92078.1|/0.0/ferredoxin-nitrite reductase [Physcomitrella patens] >gi|120400317|dbj|BAF43437.1| nitrite reductase [Physcomitrella patens]
Unigene20026_Taxus	179	RawIntensity-ye	56.76	123.69	1.12378	0	0	-	-	-	gi|255679990|dbj|BAF28040.2|/0.0/Os11g0271100 [Oryza sativa Japonica Group]
Unigene19538_Taxus	73	RawIntensity-ye	23.15	50.4	1.12241	6.46574e-09	4.33684e-08	-	-	-	gi|115441335|ref|NP_001044947.1|/1e-07/Os01g0872700 [Oryza sativa (japonica cultivar-group)] >gi|113534478|dbj|BAF06861.1| Os01g0872700 [Oryza sativa Japonica Group]
Unigene18107_Taxus	42	RawIntensity-ye	13.32	28.97	1.12097	1.16039e-05	4.93674e-05	-	-	-	gi|58270062|ref|XP_572187.1|/5e-09/mitotic spindle assembly -related protein [Cryptococcus neoformans var. neoformans JEC21]
Unigene12258_Taxus	63	RawIntensity-ye	19.98	43.45	1.1208	7.43724e-08	4.34547e-07	-	-	-	gi|49659431|dbj|BAD27254.1|/5e-32/SlHDL1 [Silene latifolia]
Unigene31996_Taxus	581	RawIntensity-ye	184.24	400.34	1.11964	0	0	-	-	-	-
Unigene10307_Taxus	29	RawIntensity-ye	9.2	19.99	1.11957	0.000282574	0.00091857	-	-	-	gi|240275918|gb|EER39431.1|/2e-12/serine/threonine protein kinase RIO1 [Ajellomyces capsulatus H143]
Unigene13579_Taxus	40	RawIntensity-ye	12.68	27.52	1.11793	2.02994e-05	8.26489e-05	-	-	-	gi|124301034|gb|ABN04769.1|/5e-99/At3g10160 [Arabidopsis thaliana]
Unigene35522_Taxus	374	RawIntensity-ye	118.6	256.95	1.11538	4.17666e-13	4.38525e-12	-	-	-	gi|229609723|gb|ACQ83477.1|/4e-17/CBL-interacting protein kinase 05 [Physcomitrella patens]
Unigene16252_Taxus	38	RawIntensity-ye	12.05	26.07	1.11336	3.5553e-05	0.000138129	-	-	-	gi|110288797|gb|ABG65982.1|/5e-09/NUMOD3 motif family protein, expressed [Oryza sativa (japonica cultivar-group)]
Unigene31288_Taxus	49	RawIntensity-ye	15.54	33.6	1.11247	2.62416e-06	1.23656e-05	-	-	-	-
Unigene33633_Taxus	113	RawIntensity-ye	35.83	77.34	1.11005	1.17217e-12	1.1648e-11	-	-	-	gi|115473821|ref|NP_001060509.1|/9e-06/Os07g0657100 [Oryza sativa (japonica cultivar-group)] >gi|34395261|dbj|BAC83945.1| glyoxalase family-like protein [Oryza sativa Japonica Group] >gi|113612045|dbj|BAF22423.1| Os07g0657100 [Oryza sativa Japonica Group]
Unigene35053_Taxus	94	RawIntensity-ye	29.81	64.31	1.10925	8.12424e-11	6.60062e-10	-	-	-	gi|219128384|ref|XP_002184394.1|/2e-13/peroxisomal bifunctional enzyme [Phaeodactylum tricornutum CCAP 1055/1] >gi|217404195|gb|EEC44143.1| peroxisomal bifunctional enzyme [Phaeodactylum tricornutum CCAP 1055/1]
Unigene29737_Taxus	267	RawIntensity-ye	84.67	182.5	1.10797	6.386e-13	6.56325e-12	-	-	-	-
Unigene3362_Taxus	50	RawIntensity-ye	15.86	34.18	1.10776	2.3174e-06	1.09921e-05	-	-	-	gi|116059469|emb|CAL55176.1|/8e-19/histone deacetylase family protein (ISS) [Ostreococcus tauri]
Unigene15275_Taxus	73	RawIntensity-ye	23.15	49.83	1.106	1.18756e-08	7.69309e-08	-	-	-	gi|222138215|gb|ACM45607.1|/8e-16/truncated At3g13062 [Arabidopsis thaliana]
Unigene20537_Taxus	45	RawIntensity-ye	14.27	30.71	1.10572	7.97934e-06	3.46182e-05	-	-	-	gi|255629468|gb|ACU15080.1|/1e-06/unknown [Glycine max]
Unigene4968_Taxus	94	RawIntensity-ye	29.81	64.02	1.10273	1.09797e-10	8.78181e-10	-	-	-	gi|2245000|emb|CAB10420.1|/2e-07/LET1 like protein [Arabidopsis thaliana] >gi|7268394|emb|CAB78686.1| LET1 like protein [Arabidopsis thaliana]
Unigene19864_Taxus	154	RawIntensity-ye	48.83	104.86	1.10262	1.90958e-13	2.11998e-12	-	-	-	gi|115458368|ref|NP_001052784.1|/1e-146/Os04g0420900 [Oryza sativa (japonica cultivar-group)] >gi|39546205|emb|CAE04630.3| OSJNBa0028I23.12 [Oryza sativa (japonica cultivar-group)] >gi|113564355|dbj|BAF14698.1| Os04g0420900 [Oryza sativa Japonica Group]
Unigene20539_Taxus	77	RawIntensity-ye	24.42	52.43	1.10233	5.37012e-09	3.62765e-08	-	-	-	gi|152717466|dbj|BAF73724.1|/3e-51/pentatricopeptide repeat protein [Raphanus sativus]
Unigene5199_Taxus	66	RawIntensity-ye	20.93	44.9	1.10114	6.97082e-08	4.09957e-07	-	-	-	gi|19115685|ref|NP_594773.1|/6e-43/human amsh protein homolog [Schizosaccharomyces pombe] >gi|74638626|sp|Q9P371.1|SST2_SCHPO RecName: Full=AMSH-like protease sst2; AltName: Full=Suppressor of ste12 deletion protein 2 >gi|9588467|emb|CAC00558.1| human AMSH protein homolog [Schizosaccharomyces pombe]
Unigene30942_Taxus	119	RawIntensity-ye	37.74	80.82	1.09862	3.16858e-13	3.3982e-12	-	-	-	-
Unigene16551_Taxus	35	RawIntensity-ye	11.1	23.75	1.09737	9.63944e-05	0.000345836	GO:0016020//membrane	-	-	gi|18406556|ref|NP_566019.1|/5e-14/COX10 (cytochrome c oxidase 10); prenyltransferase/ protoheme IX farnesyltransferase [Arabidopsis thaliana]
Unigene21279_Taxus	100	RawIntensity-ye	31.71	67.79	1.09613	3.91102e-11	3.28431e-10	-	-	-	gi|255678152|dbj|BAH94112.1|/1e-21/Os08g0152800 [Oryza sativa Japonica Group]
Unigene19044_Taxus	103	RawIntensity-ye	32.66	69.81	1.09591	2.00358e-11	1.73934e-10	-	-	-	gi|159473054|ref|XP_001694654.1|/8e-93/U2 snRNP auxiliary factor, large subunit [Chlamydomonas reinhardtii] >gi|158276466|gb|EDP02238.1| U2 snRNP auxiliary factor, large subunit [Chlamydomonas reinhardtii]
Unigene21051_Taxus	218	RawIntensity-ye	69.13	147.74	1.09568	0	0	-	-	-	gi|238842031|gb|EEQ31693.1|/1e-06/DJ-1/PfpI family protein [Microsporum canis CBS 113480]
Unigene30740_Taxus	98	RawIntensity-ye	31.08	66.34	1.09389	6.73094e-11	5.51343e-10	-	-	-	-
Unigene33295_Taxus	143	RawIntensity-ye	45.35	96.75	1.09316	0	0	-	GO:0005524//ATP binding;GO:0004674//protein serine/threonine kinase activity	GO:0006468//protein amino acid phosphorylation;GO:0007165//signal transduction	gi|116265960|gb|ABJ91228.1|/1e-42/CBL-interacting protein kinase 22 [Populus trichocarpa]
Unigene16538_Taxus	45	RawIntensity-ye	14.27	30.42	1.09203	1.08257e-05	4.62536e-05	-	-	-	gi|224066243|ref|XP_002302043.1|/3e-08/predicted protein [Populus trichocarpa] >gi|222843769|gb|EEE81316.1| predicted protein [Populus trichocarpa]
Unigene35311_Taxus	353	RawIntensity-ye	111.94	238.41	1.09072	0	0	-	-	-	gi|255954959|ref|XP_002568232.1|/1e-38/Pc21g12010 [Penicillium chrysogenum Wisconsin 54-1255] >gi|211589943|emb|CAP96098.1| Pc21g12010 [Penicillium chrysogenum Wisconsin 54-1255]
Unigene21406_Taxus	58	RawIntensity-ye	18.39	39.11	1.08862	6.30066e-07	3.24425e-06	-	-	-	gi|255939930|ref|XP_002560734.1|/5e-25/Pc16g03770 [Penicillium chrysogenum Wisconsin 54-1255] >gi|211585357|emb|CAP93047.1| Pc16g03770 [Penicillium chrysogenum Wisconsin 54-1255]
Unigene22902_Taxus	622	RawIntensity-ye	197.24	419.46	1.08858	0	0	-	-	-	-
Unigene35388_Taxus	55	RawIntensity-ye	17.44	37.08	1.08824	1.24018e-06	6.12634e-06	-	-	-	-
Unigene30830_Taxus	52	RawIntensity-ye	16.49	35.05	1.08782	2.44432e-06	1.15515e-05	-	-	-	gi|115467364|ref|NP_001057281.1|/5e-48/Os06g0246500 [Oryza sativa (japonica cultivar-group)] >gi|113595321|dbj|BAF19195.1| Os06g0246500 [Oryza sativa Japonica Group]
Unigene6437_Taxus	43	RawIntensity-ye	13.64	28.97	1.08672	1.88958e-05	7.72135e-05	-	-	-	-
Unigene20756_Taxus	81	RawIntensity-ye	25.69	54.46	1.08399	4.41836e-09	3.00729e-08	-	-	-	gi|119493344|ref|XP_001263862.1|/5e-09/IFRD domain protein [Neosartorya fischeri NRRL 181] >gi|119412022|gb|EAW21965.1| IFRD domain protein [Neosartorya fischeri NRRL 181]
Unigene21349_Taxus	241	RawIntensity-ye	76.42	161.64	1.08076	2.20934e-13	2.43027e-12	-	-	-	gi|38567037|emb|CAE76335.1|/8e-06/related to signal peptidase 18 KD subunit [Neurospora crassa]
Unigene32240_Taxus	296	RawIntensity-ye	93.86	198.43	1.08005	2.9754e-13	3.20439e-12	-	-	-	-
Unigene3651_Taxus	58	RawIntensity-ye	18.39	38.82	1.07788	8.50196e-07	4.28935e-06	-	-	-	gi|148906904|gb|ABR16597.1|/7e-11/unknown [Picea sitchensis]
Unigene35947_Taxus	283	RawIntensity-ye	89.74	189.16	1.07578	0	0	-	-	-	gi|255081184|ref|XP_002507814.1|/1e-113/non phosphorylating glyceraldehyde-3-phosphate dehydrogenase [Micromonas sp. RCC299] >gi|226523090|gb|ACO69072.1| non phosphorylating glyceraldehyde-3-phosphate dehydrogenase [Micromonas sp. RCC299]
Unigene18673_Taxus	49	RawIntensity-ye	15.54	32.73	1.07463	6.51852e-06	2.90077e-05	-	-	-	gi|11467470|ref|NP_043616.1|/4e-33/ribosomal protein L4 [Odontella sinensis] >gi|1350651|sp|P49546.1|RK4_ODOSI RecName: Full=50S ribosomal protein L4, chloroplastic >gi|1185165|emb|CAA91648.1| 50S ribosomal protein L4 [Odontella sinensis]
Unigene23464_Taxus	36	RawIntensity-ye	11.42	24.04	1.07387	0.000115057	0.000404644	-	-	-	-
Unigene22856_Taxus	195	RawIntensity-ye	61.84	130.07	1.07268	2.44916e-13	2.67771e-12	-	-	-	gi|148908683|gb|ABR17449.1|/3e-13/unknown [Picea sitchensis]
Unigene5523_Taxus	114	RawIntensity-ye	36.15	75.9	1.0701	7.00994e-12	6.41989e-11	-	-	-	gi|119483910|ref|XP_001261858.1|/4e-08/Ankyrin repeat protein [Neosartorya fischeri NRRL 181] >gi|119410014|gb|EAW19961.1| Ankyrin repeat protein [Neosartorya fischeri NRRL 181]
Unigene32978_Taxus	67	RawIntensity-ye	21.25	44.61	1.0699	1.50906e-07	8.39733e-07	-	-	-	gi|255677440|dbj|BAF20602.2|/3e-16/Os07g0103200 [Oryza sativa Japonica Group]
Unigene11542_Taxus	101	RawIntensity-ye	32.03	67.21	1.06925	1.12707e-10	9.00255e-10	-	-	-	gi|207344362|gb|EDZ71531.1|/2e-42/YIL095Wp-like protein [Saccharomyces cerevisiae AWRI1631]
Unigene23012_Taxus	81	RawIntensity-ye	25.69	53.88	1.06854	7.98472e-09	5.29646e-08	-	-	-	-
Unigene30086_Taxus	85	RawIntensity-ye	26.95	56.49	1.06771	3.60524e-09	2.48297e-08	-	-	-	gi|149390997|gb|ABR25516.1|/3e-16/protein usf [Oryza sativa Indica Group]
Unigene11002_Taxus	41	RawIntensity-ye	13	27.23	1.06669	4.46268e-05	0.000170077	-	-	-	gi|226459950|gb|EEH57245.1|/1e-05/set domain protein [Micromonas pusilla CCMP1545]
Unigene706_Taxus	48	RawIntensity-ye	15.22	31.86	1.06578	9.98558e-06	4.28266e-05	-	-	-	-
Unigene17792_Taxus	73	RawIntensity-ye	23.15	48.38	1.0634	5.2747e-08	3.15151e-07	-	-	-	gi|210063845|gb|ACJ06598.1|/4e-06/expressed protein [Aegilops speltoides]
Unigene11741_Taxus	119	RawIntensity-ye	37.74	78.79	1.06192	3.56914e-12	3.36813e-11	-	-	-	-
Unigene5148_Taxus	35	RawIntensity-ye	11.1	23.17	1.0617	0.000177228	0.000601205	-	-	-	gi|145358511|ref|NP_198199.2|/1e-112/transporter [Arabidopsis thaliana] >gi|91806916|gb|ABE66185.1| proton-dependent oligopeptide transport family protein [Arabidopsis thaliana]
Unigene17963_Taxus	123	RawIntensity-ye	39	81.4	1.06155	1.61582e-12	1.57606e-11	-	-	-	gi|189198401|ref|XP_001935538.1|/0.0/glycogen phosphorylase 1 [Pyrenophora tritici-repentis Pt-1C-BFP] >gi|187981486|gb|EDU48112.1| glycogen phosphorylase 1 [Pyrenophora tritici-repentis Pt-1C-BFP]
Unigene3658_Taxus	53	RawIntensity-ye	16.81	35.05	1.06009	3.91394e-06	1.79544e-05	-	-	-	gi|159467236|ref|XP_001691804.1|/3e-21/clp protease adaptor protein [Chlamydomonas reinhardtii] >gi|158279150|gb|EDP04912.1| clp protease adaptor protein [Chlamydomonas reinhardtii]
Unigene33545_Taxus	96	RawIntensity-ye	30.44	63.44	1.05942	5.0599e-10	3.80996e-09	-	-	-	gi|149391754|gb|ABR25827.1|/3e-14/hydrolase [Oryza sativa Indica Group]
Unigene36265_Taxus	135	RawIntensity-ye	42.81	89.22	1.05942	3.55716e-13	3.77668e-12	-	-	-	gi|159125075|gb|EDP50192.1|/2e-97/threonine dehydratase, biosynthetic [Aspergillus fumigatus A1163]
Unigene27381_Taxus	150	RawIntensity-ye	47.57	99.07	1.0584	0	0	-	-	-	gi|195658169|gb|ACG48552.1|/1e-23/60S ribosomal protein L10-3 [Zea mays]
Unigene6147_Taxus	40	RawIntensity-ye	12.68	26.36	1.0558	6.85022e-05	0.000250308	-	-	-	gi|115441843|ref|NP_001045201.1|/5e-80/Os01g0917400 [Oryza sativa (japonica cultivar-group)]
Unigene17921_Taxus	109	RawIntensity-ye	34.56	71.84	1.05568	4.14622e-11	3.47857e-10	-	-	-	gi|15231487|ref|NP_187418.1|/1e-111/IBM1 (increase in bonsai methylation 1); histone demethylase(H3-K9 specific) / transcription factor [Arabidopsis thaliana]
Unigene23757_Taxus	304	RawIntensity-ye	96.4	200.17	1.05412	0	0	-	-	-	gi|116791239|gb|ABK25906.1|/9e-07/unknown [Picea sitchensis] >gi|116794103|gb|ABK27007.1| unknown [Picea sitchensis] >gi|224284470|gb|ACN39969.1| unknown [Picea sitchensis]
Unigene383_Taxus	118	RawIntensity-ye	37.42	77.63	1.0528	7.45448e-12	6.79589e-11	-	-	-	gi|240279660|gb|EER43165.1|/1e-26/transformer-SR ribonucleoprotein [Ajellomyces capsulatus H143]
Unigene12436_Taxus	71	RawIntensity-ye	22.51	46.64	1.051	1.22035e-07	6.91265e-07	-	-	-	gi|18394031|ref|NP_563933.1|/4e-07/AFP2 (ABI FIVE BINDING PROTEIN 2) [Arabidopsis thaliana] >gi|75174856|sp|Q9LMX5.1|U7372_ARATH RecName: Full=UPF0737 protein AFP2; AltName: Full=ABI five-binding protein 2; Short=ABI5-binding protein 2 >gi|90093290|gb|ABD85158.1| At1g13740 [Arabidopsis thaliana]
Unigene12356_Taxus	61	RawIntensity-ye	19.34	39.98	1.04769	1.04837e-06	5.22325e-06	GO:0005886//plasma membrane	GO:0015204//urea transmembrane transporter activity	GO:0006811//ion transport;GO:0006995//cellular response to nitrogen starvation	gi|159466788|ref|XP_001691580.1|/1e-150/urea active transporter [Chlamydomonas reinhardtii] >gi|158278926|gb|EDP04688.1| urea active transporter [Chlamydomonas reinhardtii]
Unigene31115_Taxus	108	RawIntensity-ye	34.25	70.68	1.0452	8.37926e-11	6.77722e-10	-	-	-	gi|115473541|ref|NP_001060369.1|/8e-06/Os07g0632800 [Oryza sativa (japonica cultivar-group)]
Unigene31228_Taxus	178	RawIntensity-ye	56.44	116.45	1.04492	1.00142e-13	1.18407e-12	-	-	-	-
Unigene24830_Taxus	233	RawIntensity-ye	73.89	152.37	1.04413	0	0	-	-	-	-
Unigene36301_Taxus	516	RawIntensity-ye	163.63	337.19	1.04312	0	0	-	-	-	gi|19113482|ref|NP_596690.1|/9e-08/sequence orphan [Schizosaccharomyces pombe] >gi|74582853|sp|O94317.1|YH5D_SCHPO RecName: Full=Uncharacterized serine-rich protein C215.13; Flags: Precursor >gi|3873550|emb|CAA22127.1| sequence orphan [Schizosaccharomyces pombe]
Unigene25671_Taxus	51	RawIntensity-ye	16.17	33.31	1.04264	9.12212e-06	3.92637e-05	-	-	-	-
Unigene10878_Taxus	63	RawIntensity-ye	19.98	41.13	1.04163	8.11474e-07	4.10089e-06	-	-	-	-
Unigene20876_Taxus	40	RawIntensity-ye	12.68	26.07	1.03984	9.21572e-05	0.000331162	-	-	-	gi|116000781|emb|CAL50461.1|/1e-83/Predicted unusual protein kinase (ISS) [Ostreococcus tauri]
Unigene11087_Taxus	85	RawIntensity-ye	26.95	55.33	1.03778	1.15365e-08	7.4788e-08	-	-	-	-
Unigene9026_Taxus	174	RawIntensity-ye	55.18	113.27	1.03755	1.19904e-13	1.38498e-12	-	-	-	gi|6573706|gb|AAF17626.1|AC009978_2/1e-116/T23E18.6 [Arabidopsis thaliana]
Unigene32212_Taxus	131	RawIntensity-ye	41.54	85.17	1.03584	1.58695e-12	1.55549e-11	-	-	-	gi|116779025|gb|ABK21105.1|/1e-07/unknown [Picea sitchensis] >gi|116780200|gb|ABK21586.1| unknown [Picea sitchensis]
Unigene30415_Taxus	268	RawIntensity-ye	84.98	174.1	1.03472	6.4837e-14	8.01378e-13	-	-	-	-
Unigene11365_Taxus	197	RawIntensity-ye	62.47	127.75	1.03209	0	0	-	-	-	gi|224014844|ref|XP_002297084.1|/1e-39/serine protease [Thalassiosira pseudonana CCMP1335] >gi|220968464|gb|EED86812.1| serine protease [Thalassiosira pseudonana CCMP1335]
Unigene15565_Taxus	76	RawIntensity-ye	24.1	49.25	1.03109	8.61432e-08	4.97348e-07	-	-	-	-
Unigene3628_Taxus	43	RawIntensity-ye	13.64	27.81	1.02776	6.21764e-05	0.000232094	-	-	-	gi|18408889|ref|NP_564913.1|/4e-41/protein kinase family protein [Arabidopsis thaliana]
Unigene33897_Taxus	56	RawIntensity-ye	17.76	36.21	1.02776	4.77504e-06	2.16017e-05	-	-	-	-
Unigene34349_Taxus	87	RawIntensity-ye	27.59	56.2	1.02642	1.19078e-08	7.71113e-08	-	-	-	gi|199433937|emb|CAG90229.2|/1e-17/DEHA2G05192p [Debaryomyces hansenii]
Unigene33762_Taxus	680	RawIntensity-ye	215.63	438.58	1.02428	3.90354e-13	4.12012e-12	-	-	-	-
Unigene19421_Taxus	49	RawIntensity-ye	15.54	31.58	1.02302	2.11842e-05	8.60955e-05	-	-	-	gi|45190350|ref|NP_984604.1|/2e-23/AEL257Wp [Ashbya gossypii ATCC 10895] >gi|44983246|gb|AAS52428.1| AEL257Wp [Ashbya gossypii ATCC 10895]
Unigene10189_Taxus	41	RawIntensity-ye	13	26.36	1.01984	0.000108302	0.000382458	-	-	-	gi|115460530|ref|NP_001053865.1|/7e-38/Os04g0614800 [Oryza sativa (japonica cultivar-group)]
Unigene21254_Taxus	155	RawIntensity-ye	49.15	99.65	1.01968	3.91686e-13	4.12934e-12	-	-	-	gi|255678451|dbj|BAF23720.2|/2e-96/Os08g0415600 [Oryza sativa Japonica Group]
Unigene15900_Taxus	114	RawIntensity-ye	36.15	73.29	1.01962	9.24034e-11	7.45691e-10	-	-	-	gi|159479892|ref|XP_001698020.1|/4e-31/NAD-dependent epimerase/dehydratase [Chlamydomonas reinhardtii] >gi|158273819|gb|EDO99605.1| NAD-dependent epimerase/dehydratase [Chlamydomonas reinhardtii]
Unigene20990_Taxus	50	RawIntensity-ye	15.86	32.15	1.01943	1.85877e-05	7.60409e-05	-	-	-	gi|226282045|gb|EEH37611.1|/2e-37/peroxisomal membrane protein PMP34 [Paracoccidioides brasiliensis Pb01]
Unigene112_Taxus	159	RawIntensity-ye	50.42	101.97	1.01608	7.54952e-14	9.24226e-13	-	-	-	gi|259486916|tpe|CBF85164.1|/5e-42/TPA: succinate semialdehyde dehydrogenase (Eurofung) [Aspergillus nidulans FGSC A4]
Unigene28228_Taxus	62	RawIntensity-ye	19.66	39.69	1.01351	2.19146e-06	1.04249e-05	-	-	-	-
Unigene14426_Taxus	48	RawIntensity-ye	15.22	30.71	1.01274	3.22336e-05	0.000126296	-	-	-	gi|219560622|gb|ACL27578.1|/9e-09/DnaJ cysteine-rich-domain [Cucumis melo]
Unigene34321_Taxus	157	RawIntensity-ye	49.79	100.23	1.00939	1.88738e-14	2.47741e-13	-	-	-	gi|115488908|ref|NP_001066941.1|/4e-43/Os12g0538500 [Oryza sativa (japonica cultivar-group)] >gi|108862778|gb|ABA99335.2| CHY zinc finger family protein, expressed [Oryza sativa (japonica cultivar-group)] >gi|113649448|dbj|BAF29960.1| Os12g0538500 [Oryza sativa Japonica Group]
Unigene5018_Taxus	85	RawIntensity-ye	26.95	54.17	1.00721	3.60254e-08	2.2029e-07	-	GO:0005524//ATP binding;GO:0017111//nucleoside-triphosphatase activity	-	gi|240256093|ref|NP_194529.4|/1e-54/ATP binding / ATPase/ nucleoside-triphosphatase/ nucleotide binding [Arabidopsis thaliana]
Unigene20004_Taxus	120	RawIntensity-ye	38.05	76.48	1.00719	5.67868e-11	4.67491e-10	-	-	-	gi|154986385|gb|ABS89146.1|/2e-67/CFM2 alternative polyadenylation form 1 [Zea mays]
Unigene30168_Taxus	65	RawIntensity-ye	20.61	41.42	1.00698	1.48373e-06	7.27157e-06	-	-	-	gi|254582903|ref|XP_002499183.1|/7e-13/ZYRO0E05830p [Zygosaccharomyces rouxii] >gi|238942757|emb|CAR30928.1| ZYRO0E05830p [Zygosaccharomyces rouxii]
Unigene22026_Taxus	235	RawIntensity-ye	74.52	149.48	1.00425	4.15668e-13	4.37192e-12	GO:0005759//mitochondrial matrix;GO:0009507//chloroplast	GO:0030170//pyridoxal phosphate binding;GO:0004069//L-aspartate:2-oxoglutarate aminotransferase activity	GO:0006520//cellular amino acid metabolic process;GO:0009058//biosynthetic process	gi|3378163|emb|CAA04697.1|/2e-27/aspartate aminotransferase 2 [Canavalia lineata]
Unigene16980_Taxus	83	RawIntensity-ye	26.32	52.72	1.00219	6.17706e-08	3.66873e-07	-	-	-	gi|187608861|sp|Q0UQV6.2|BST1_PHANO/6e-36/RecName: Full=GPI inositol-deacylase
Unigene12637_Taxus	146	RawIntensity-ye	46.3	92.7	1.00156	6.799e-13	6.95989e-12	-	-	-	gi|108861895|sp|Q8H0U8.2|RH42_ARATH/9e-07/RecName: Full=DEAD-box ATP-dependent RNA helicase 42 >gi|4836896|gb|AAD30599.1|AC007369_9 Similar to RNA helicases [Arabidopsis thaliana]
Unigene32569_Taxus	237	RawIntensity-ye	75.15	150.34	1.00038	2.30482e-13	2.52604e-12	-	-	-	gi|7019678|emb|CAB75803.1|/7e-33/allyl alcohol dehydrogenase-like protein [Arabidopsis thaliana]
Unigene6204_Taxus	7003	RawIntensity-ye	2220.7	0.01	-17.7607	0	0	-	-	-	-
Unigene22503_Taxus	1020	RawIntensity-ye	323.45	0.01	-14.9813	0	0	-	-	-	-
Unigene24204_Taxus	697	RawIntensity-ye	221.02	0.01	-14.4319	1.45098e-224	7.19332e-223	GO:0005737//cytoplasm	GO:0005506//iron ion binding;GO:0016165//lipoxygenase activity	GO:0006633//fatty acid biosynthetic process;GO:0009611//response to wounding;GO:0051707//response to other organism;GO:0022900//electron transport chain	gi|218092006|emb|CAP59449.1|/3e-17/lipoxygenase [Momordica charantia]
Unigene6967_Taxus	469	RawIntensity-ye	148.72	0.01	-13.8603	2.37816e-151	1.11742e-149	-	-	-	gi|226529229|ref|NP_001151052.1|/1e-11/PHI-1 [Zea mays] >gi|195643924|gb|ACG41430.1| PHI-1 [Zea mays]
Unigene12116_Taxus	413	RawIntensity-ye	130.96	0.01	-13.6768	2.28438e-133	1.06227e-131	-	-	-	gi|224054168|ref|XP_002298125.1|/7e-12/2-oxoglutarate-dependent dioxygenase [Populus trichocarpa] >gi|222845383|gb|EEE82930.1| 2-oxoglutarate-dependent dioxygenase [Populus trichocarpa]
Unigene11489_Taxus	402	RawIntensity-ye	127.48	0.01	-13.638	7.78126e-130	3.59978e-128	-	-	-	gi|6856103|gb|AAF29773.1|/5e-06/glutathione S-transferase [Gossypium hirsutum]
Unigene19098_Taxus	379	RawIntensity-ye	120.18	0.01	-13.5529	1.89117e-122	8.72656e-121	-	-	-	-
Unigene7961_Taxus	287	RawIntensity-ye	91.01	0.01	-13.1518	6.59866e-93	2.81397e-91	-	-	-	gi|15221265|ref|NP_177591.1|/2e-06/kelch repeat-containing F-box family protein [Arabidopsis thaliana] >gi|30699022|ref|NP_849884.1| kelch repeat-containing F-box family protein [Arabidopsis thaliana] >gi|75169842|sp|Q9CA63.1|FBK29_ARATH RecName: Full=F-box/kelch-repeat protein At1g74510
Unigene22011_Taxus	263	RawIntensity-ye	83.4	0.01	-13.0258	3.35934e-85	1.38024e-83	-	-	-	-
Unigene23730_Taxus	227	RawIntensity-ye	71.98	0.01	-12.8134	1.22026e-73	4.71239e-72	-	GO:0005199//structural constituent of cell wall	GO:0009664//plant-type cell wall organization	gi|4033606|dbj|BAA35135.1|/2e-10/Extensin [Adiantum capillus-veneris]
Unigene34863_Taxus	218	RawIntensity-ye	69.13	0.01	-12.7551	9.47328e-71	3.61189e-69	-	-	-	gi|115435798|ref|NP_001042657.1|/1e-56/Os01g0263300 [Oryza sativa (japonica cultivar-group)] >gi|55700873|tpe|CAH69246.1| TPA: class III peroxidase 3 precursor [Oryza sativa (japonica cultivar-group)] >gi|113532188|dbj|BAF04571.1| Os01g0263300 [Oryza sativa Japonica Group]
Unigene34785_Taxus	214	RawIntensity-ye	67.86	0.01	-12.7283	1.82375e-69	6.89502e-68	-	-	-	gi|18390044|gb|AAL68831.1|AF463407_2/2e-29/Enod8.2 [Medicago truncatula]
Unigene31024_Taxus	212	RawIntensity-ye	67.23	0.01	-12.7149	8.00202e-69	3.01264e-67	-	-	-	gi|228480393|gb|ACQ41879.1|/5e-38/pathogenisis-related protein 1.1 [Triticum aestivum]
Unigene17595_Taxus	189	RawIntensity-ye	59.93	0.01	-12.5491	1.94483e-61	6.99982e-60	-	-	-	gi|226502604|ref|NP_001147572.1|/2e-79/flavonoid 3-monooxygenase [Zea mays] >gi|195612262|gb|ACG27961.1| flavonoid 3-monooxygenase [Zea mays]
Unigene9367_Taxus	185	RawIntensity-ye	58.66	0.01	-12.5182	3.7441e-60	1.33423e-58	-	-	-	-
Unigene19132_Taxus	176	RawIntensity-ye	55.81	0.01	-12.4463	2.90668e-57	1.00787e-55	-	-	-	gi|283135846|gb|ADB11314.1|/1e-33/tau class glutathione transferase GSTU9 [Populus trichocarpa]
Unigene16974_Taxus	174	RawIntensity-ye	55.18	0.01	-12.4299	1.27535e-56	4.40522e-55	-	-	-	gi|224815364|gb|ACN65827.1|/1e-104/flavonoid 3'-hydroxylase [Centaurea cyanus]
Unigene2795_Taxus	168	RawIntensity-ye	53.27	0.01	-12.3791	1.07728e-54	3.69271e-53	-	-	-	-
Unigene13670_Taxus	139	RawIntensity-ye	44.08	0.01	-12.1059	2.21162e-45	6.92179e-44	-	-	-	gi|119224822|dbj|BAF41218.1|/1e-13/cytochrome P450 [Solanum lycopersicum]
Unigene21327_Taxus	138	RawIntensity-ye	43.76	0.01	-12.0954	4.63262e-45	1.44737e-43	-	-	-	gi|7270328|emb|CAB80096.1|/1e-109/male sterility 2-like protein [Arabidopsis thaliana]
Unigene29517_Taxus	137	RawIntensity-ye	43.44	0.01	-12.0848	9.70382e-45	3.00568e-43	-	-	-	-
Unigene35136_Taxus	134	RawIntensity-ye	42.49	0.01	-12.0529	8.91852e-44	2.7342e-42	-	-	-	-
Unigene19222_Taxus	133	RawIntensity-ye	42.18	0.01	-12.0423	1.86814e-43	5.67889e-42	-	-	-	gi|114797021|gb|ABI79448.1|/4e-07/apoplastic protein [Arnebia euchroma]
Unigene13248_Taxus	130	RawIntensity-ye	41.22	0.01	-12.0091	1.71695e-42	5.1756e-41	-	-	-	gi|115451103|ref|NP_001049152.1|/1e-34/Os03g0178400 [Oryza sativa (japonica cultivar-group)] >gi|27436746|gb|AAO13465.1| Unknown protein [Oryza sativa Japonica Group] >gi|108706488|gb|ABF94283.1| hydrolase, alpha/beta fold family protein, expressed [Oryza sativa (japonica cultivar-group)] >gi|113547623|dbj|BAF11066.1| Os03g0178400 [Oryza sativa Japonica Group]
Unigene6940_Taxus	130	RawIntensity-ye	41.22	0.01	-12.0091	1.71695e-42	5.16694e-41	-	-	-	gi|15229656|ref|NP_188478.1|/7e-32/aspartyl protease family protein [Arabidopsis thaliana] >gi|11994113|dbj|BAB01116.1| CND41, chloroplast nucleoid DNA binding protein-like [Arabidopsis thaliana]
Unigene34805_Taxus	123	RawIntensity-ye	39	0.01	-11.9293	3.0379e-40	8.90392e-39	-	-	-	gi|88771145|gb|ABD52122.1|/3e-17/dirigent-like protein pDIR11 [Picea sitchensis]
Unigene22710_Taxus	122	RawIntensity-ye	38.69	0.01	-11.9177	6.36342e-40	1.85301e-38	-	-	-	-
Unigene31719_Taxus	122	RawIntensity-ye	38.69	0.01	-11.9177	6.36342e-40	1.85002e-38	-	-	-	-
Unigene13472_Taxus	119	RawIntensity-ye	37.74	0.01	-11.8819	5.84846e-39	1.66533e-37	-	-	-	gi|107738137|gb|ABF83646.1|/9e-43/At1g78815 [Arabidopsis thaliana]
Unigene33057_Taxus	117	RawIntensity-ye	37.1	0.01	-11.8572	2.5661e-38	7.18189e-37	-	-	-	gi|51104383|gb|AAT96852.1|/1e-19/allene oxide cyclase C4 [Humulus lupulus]
Unigene34161_Taxus	116	RawIntensity-ye	36.78	0.01	-11.8447	5.37516e-38	1.48818e-36	-	-	-	gi|15232058|ref|NP_186768.1|/7e-56/peroxidase 27 (PER27) (P27) (PRXR7) [Arabidopsis thaliana] >gi|25453197|sp|Q43735.1|PER27_ARATH RecName: Full=Peroxidase 27; Short=Atperox P27; AltName: Full=PRXR7; AltName: Full=ATP12a; Flags: Precursor >gi|1402916|emb|CAA66963.1| peroxidase [Arabidopsis thaliana] >gi|1429217|emb|CAA67311.1| peroxidase ATP12a [Arabidopsis thaliana]
Unigene13461_Taxus	113	RawIntensity-ye	35.83	0.01	-11.807	4.94016e-37	1.33488e-35	-	-	-	-
Unigene6429_Taxus	109	RawIntensity-ye	34.56	0.01	-11.7549	9.51058e-36	2.5281e-34	-	-	-	gi|18086341|gb|AAL57633.1|/1e-17/AT3g48690/T8P19_200 [Arabidopsis thaliana]
Unigene27226_Taxus	109	RawIntensity-ye	34.56	0.01	-11.7549	9.51058e-36	2.52437e-34	-	-	-	gi|15217644|ref|NP_174083.1|/1e-06/transferase family protein [Arabidopsis thaliana] >gi|5668772|gb|AAD45999.1|AC005916_11 Similar to gb|Z84571 anthranilate N-hydroxycinnamoyl/benzoyltransferase from Dianthus caryophyllus [Arabidopsis thaliana] >gi|6693014|gb|AAF24940.1|AC012375_3 T22C5.6 [Arabidopsis thaliana] >gi|50253446|gb|AAT71925.1| At1g27620 [Arabidopsis thaliana] >gi|53828625|gb|AAU94422.…
Unigene13206_Taxus	108	RawIntensity-ye	34.25	0.01	-11.7419	1.99216e-35	5.2337e-34	-	-	-	-
Unigene21027_Taxus	107	RawIntensity-ye	33.93	0.01	-11.7283	4.17292e-35	1.09151e-33	-	-	-	gi|42557351|dbj|BAD11071.1|/6e-06/hin1 like protein [Capsicum chinense]
Unigene23564_Taxus	106	RawIntensity-ye	33.61	0.01	-11.7147	8.7409e-35	2.28304e-33	GO:0005737//cytoplasm	GO:0004356//glutamate-ammonia ligase activity	GO:0006542//glutamine biosynthetic process	gi|11386829|sp|Q43785.1|GLNA3_MEDSA/1e-29/RecName: Full=Glutamine synthetase nodule isozyme; AltName: Full=Glutamate--ammonia ligase >gi|561674|gb|AAB41554.1| cytosolic glutamine synthetase [Medicago sativa]
Unigene33198_Taxus	106	RawIntensity-ye	33.61	0.01	-11.7147	8.7409e-35	2.27973e-33	GO:0016023//cytoplasmic membrane-bounded vesicle	GO:0005199//structural constituent of cell wall	GO:0006869//lipid transport	gi|1709767|sp|Q00451.1|PRF1_SOLLC/5e-24/RecName: Full=36.4 kDa proline-rich protein >gi|19390|emb|CAA43666.1| proline rich protein [Solanum lycopersicum]
Unigene32255_Taxus	105	RawIntensity-ye	33.3	0.01	-11.7013	1.83094e-34	4.75462e-33	-	-	-	gi|1370589|emb|CAA66948.1|/8e-06/protein induced upon tuberization [Solanum demissum]
Unigene6496_Taxus	102	RawIntensity-ye	32.34	0.01	-11.6591	1.68276e-33	4.30768e-32	-	-	-	gi|14194135|gb|AAK56262.1|AF367273_1/3e-88/AT5g44790/K23L20_14 [Arabidopsis thaliana]
Unigene22494_Taxus	101	RawIntensity-ye	32.03	0.01	-11.6452	3.52484e-33	8.90913e-32	-	-	-	-
Unigene24105_Taxus	100	RawIntensity-ye	31.71	0.01	-11.6307	7.3834e-33	1.84544e-31	-	-	-	-
Unigene15106_Taxus	100	RawIntensity-ye	31.71	0.01	-11.6307	7.3834e-33	1.84288e-31	-	-	-	-
Unigene3224_Taxus	99	RawIntensity-ye	31.39	0.01	-11.6161	1.54658e-32	3.85488e-31	-	-	-	gi|207347969|gb|EDZ73967.1|/1e-14/YAR007Cp-like protein [Saccharomyces cerevisiae AWRI1631] >gi|256270812|gb|EEU05961.1| Rfa1p [Saccharomyces cerevisiae JAY291] >gi|259144715|emb|CAY77656.1| Rfa1p [Saccharomyces cerevisiae EC1118]
Unigene34119_Taxus	94	RawIntensity-ye	29.81	0.01	-11.5416	6.2367e-31	1.5167e-29	-	-	-	gi|11072028|gb|AAG28907.1|AC008113_23/5e-45/F12A21.12 [Arabidopsis thaliana]
Unigene1035_Taxus	92	RawIntensity-ye	29.17	0.01	-11.5103	2.73646e-30	6.5836e-29	-	-	-	gi|224055833|ref|XP_002298676.1|/1e-09/fasciclin-like AGP 14.8 protein [Populus trichocarpa] >gi|222845934|gb|EEE83481.1| fasciclin-like AGP 14.8 protein [Populus trichocarpa]
Unigene2912_Taxus	89	RawIntensity-ye	28.22	0.01	-11.4625	2.515e-29	5.91633e-28	-	-	-	gi|115471003|ref|NP_001059100.1|/6e-09/Os07g0192600 [Oryza sativa (japonica cultivar-group)] >gi|50510116|dbj|BAD30884.1| AAA-type ATPase-like [Oryza sativa Japonica Group] >gi|113610636|dbj|BAF21014.1| Os07g0192600 [Oryza sativa Japonica Group]
Unigene23499_Taxus	88	RawIntensity-ye	27.91	0.01	-11.4466	5.2681e-29	1.23444e-27	-	-	-	gi|195605956|gb|ACG24808.1|/7e-31/protein translation factor SUI1 [Zea mays]
Unigene36344_Taxus	87	RawIntensity-ye	27.59	0.01	-11.4299	1.1035e-28	2.56902e-27	-	-	-	gi|255678900|dbj|BAH94567.1|/9e-11/Os09g0416600 [Oryza sativa Japonica Group]
Unigene1659_Taxus	87	RawIntensity-ye	27.59	0.01	-11.4299	1.1035e-28	2.5657e-27	-	-	-	gi|114793221|gb|ABI78960.1|/4e-57/cellulose synthase 7 [Physcomitrella patens]
Unigene35257_Taxus	86	RawIntensity-ye	27.27	0.01	-11.4131	2.31146e-28	5.31931e-27	-	-	-	gi|225459487|ref|XP_002284410.1|/7e-84/PREDICTED: similar to flavonol synthase [Vitis vinifera]
Unigene20719_Taxus	86	RawIntensity-ye	27.27	0.01	-11.4131	2.31146e-28	5.31252e-27	-	-	-	gi|115447557|ref|NP_001047558.1|/7e-09/Os02g0643000 [Oryza sativa (japonica cultivar-group)] >gi|113537089|dbj|BAF09472.1| Os02g0643000 [Oryza sativa Japonica Group]
Unigene29841_Taxus	85	RawIntensity-ye	26.95	0.01	-11.3961	4.84178e-28	1.10155e-26	GO:0016023//cytoplasmic membrane-bounded vesicle	GO:0015297//antiporter activity	GO:0009835//ripening	gi|15223391|ref|NP_174585.1|/1e-16/MATE efflux family protein [Arabidopsis thaliana]
Unigene14478_Taxus	81	RawIntensity-ye	25.69	0.01	-11.327	9.32118e-27	2.05066e-25	-	GO:0009055//electron carrier activity;GO:0020037//heme binding;GO:0050597	GO:0042617;GO:0055114//oxidation reduction	gi|89242710|gb|ABD60225.1|/3e-45/ent-kaurenoic acid 13-hydroxylase [Stevia rebaudiana] >gi|189418962|gb|ACD93722.1| ent-kaurenoic acid 13-hydroxylase [Stevia rebaudiana]
Unigene16475_Taxus	80	RawIntensity-ye	25.37	0.01	-11.3089	1.95248e-26	4.25902e-25	-	-	-	gi|254771941|gb|ACT82248.1|/3e-31/alcohol acyltransferase [Vasconcellea cundinamarcensis]
Unigene3694_Taxus	79	RawIntensity-ye	25.05	0.01	-11.2906	4.08982e-26	8.83558e-25	-	-	-	gi|107738111|gb|ABF83638.1|/6e-06/At1g05870 [Arabidopsis thaliana]
Unigene21395_Taxus	72	RawIntensity-ye	22.83	0.01	-11.1567	7.23636e-24	1.46321e-22	-	-	-	gi|115439843|ref|NP_001044201.1|/2e-57/Os01g0740400 [Oryza sativa (japonica cultivar-group)] >gi|113533732|dbj|BAF06115.1| Os01g0740400 [Oryza sativa Japonica Group]
Unigene29147_Taxus	71	RawIntensity-ye	22.51	0.01	-11.1364	1.51578e-23	3.04103e-22	-	-	-	gi|2230959|emb|CAA71234.1|/2e-14/subtilisin-like protease [Solanum lycopersicum] >gi|4200336|emb|CAA76725.1| P69B protein [Solanum lycopersicum]
Unigene22898_Taxus	70	RawIntensity-ye	22.2	0.01	-11.1163	3.17506e-23	6.29971e-22	-	-	-	gi|40018852|gb|AAR36911.1|/2e-19/disease resistance gene [Pinus sylvestris]
Unigene4924_Taxus	70	RawIntensity-ye	22.2	0.01	-11.1163	3.17506e-23	6.29277e-22	-	GO:0008810//cellulase activity	GO:0005975//carbohydrate metabolic process	gi|1657374|emb|CAA65597.1|/0.0/endo-beta-1,4-glucanase [Prunus persica] >gi|1657380|emb|CAA65600.1| endo-beta-1,4-glucanase [Prunus persica]
Unigene12795_Taxus	69	RawIntensity-ye	21.88	0.01	-11.0954	6.65074e-23	1.30236e-21	-	-	-	gi|15227703|ref|NP_180570.1|/3e-07/GCN5-related N-acetyltransferase (GNAT) family protein [Arabidopsis thaliana] >gi|3150411|gb|AAC16963.1| hookless1-like protein [Arabidopsis thaliana]
Unigene24755_Taxus	69	RawIntensity-ye	21.88	0.01	-11.0954	6.65074e-23	1.30094e-21	-	-	-	gi|116793691|gb|ABK26844.1|/4e-16/unknown [Picea sitchensis]
Unigene15705_Taxus	68	RawIntensity-ye	21.56	0.01	-11.0741	1.39311e-22	2.69575e-21	-	-	-	gi|148907922|gb|ABR17081.1|/4e-13/unknown [Picea sitchensis]
Unigene21283_Taxus	68	RawIntensity-ye	21.56	0.01	-11.0741	1.39311e-22	2.69285e-21	-	-	-	gi|11932092|emb|CAC19184.1|/1e-112/alpha-expansin [Cicer arietinum]
Unigene21515_Taxus	67	RawIntensity-ye	21.25	0.01	-11.0532	2.91812e-22	5.57479e-21	-	-	-	gi|75165511|sp|Q94F40.1|GDL9_ARATH/2e-09/RecName: Full=GDSL esterase/lipase At1g28600; AltName: Full=Extracellular lipase At1g28600; Flags: Precursor >gi|14326570|gb|AAK60329.1|AF385739_1 At1g28600/F1K23_6 [Arabidopsis thaliana] >gi|22137320|gb|AAM91505.1| At1g28600/F1K23_6 [Arabidopsis thaliana]
Unigene28479_Taxus	66	RawIntensity-ye	20.93	0.01	-11.0314	6.1125e-22	1.14703e-20	-	-	-	-
Unigene17428_Taxus	65	RawIntensity-ye	20.61	0.01	-11.0091	1.28037e-21	2.38526e-20	-	-	-	gi|20198252|gb|AAM15483.1|/1e-151/subtilisin-like serine protease AIR3 [Arabidopsis thaliana]
Unigene19964_Taxus	64	RawIntensity-ye	20.29	0.01	-10.9866	2.68196e-21	4.93503e-20	-	-	-	gi|42572167|ref|NP_974174.1|/2e-31/protein binding / zinc ion binding [Arabidopsis thaliana]
Unigene14806_Taxus	63	RawIntensity-ye	19.98	0.01	-10.9643	5.61784e-21	1.01607e-19	-	-	-	-
Unigene32112_Taxus	63	RawIntensity-ye	19.98	0.01	-10.9643	5.61784e-21	1.01505e-19	-	-	-	gi|50844673|gb|AAT84458.1|/8e-11/cytochrome b5 isoform Cb5-A [Vernicia fordii]
Unigene34753_Taxus	61	RawIntensity-ye	19.34	0.01	-10.9174	2.46492e-20	4.35744e-19	-	-	-	gi|224142651|ref|XP_002324668.1|/1e-55/cytochrome P450 [Populus trichocarpa] >gi|222866102|gb|EEF03233.1| cytochrome P450 [Populus trichocarpa]
Unigene32598_Taxus	61	RawIntensity-ye	19.34	0.01	-10.9174	2.46492e-20	4.35316e-19	-	-	-	gi|115400095|ref|XP_001215636.1|/4e-48/40S ribosomal protein S13-1 [Aspergillus terreus NIH2624] >gi|114191302|gb|EAU33002.1| 40S ribosomal protein S13-1 [Aspergillus terreus NIH2624]
Unigene35942_Taxus	61	RawIntensity-ye	19.34	0.01	-10.9174	2.46492e-20	4.34889e-19	-	-	-	gi|255950388|ref|XP_002565961.1|/3e-83/Pc22g20610 [Penicillium chrysogenum Wisconsin 54-1255] >gi|211592978|emb|CAP99349.1| Pc22g20610 [Penicillium chrysogenum Wisconsin 54-1255]
Unigene35058_Taxus	61	RawIntensity-ye	19.34	0.01	-10.9174	2.46492e-20	4.34463e-19	-	-	-	gi|75994039|gb|ABA34055.1|/2e-43/pathogenesis-related protein 1 [Zea mays subsp. parviglumis] >gi|75994047|gb|ABA34059.1| pathogenesis-related protein 1 [Zea mays subsp. parviglumis] >gi|75994065|gb|ABA34068.1| pathogenesis-related protein 1 [Zea mays subsp. parviglumis] >gi|75994069|gb|ABA34070.1| pathogenesis-related protein 1 [Zea mays subsp. parviglumis] >gi|75994071|gb|ABA34071.1| pathogenes…
Unigene34149_Taxus	61	RawIntensity-ye	19.34	0.01	-10.9174	2.46492e-20	4.34038e-19	-	-	-	gi|166343839|gb|ABY86662.1|/1e-127/beta-tubulin 16 [Gossypium hirsutum]
Unigene17570_Taxus	60	RawIntensity-ye	19.03	0.01	-10.8941	5.1632e-20	8.99486e-19	-	-	-	gi|38605343|sp|Q8LF99.2|XTH6_ARATH/6e-12/RecName: Full=Probable xyloglucan endotransglucosylase/hydrolase protein 6; Short=At-XTH6; Short=XTH-6; Flags: Precursor >gi|15982913|gb|AAL09803.1| AT5g65730/MPA24_8 [Arabidopsis thaliana] >gi|20334766|gb|AAM16244.1| AT5g65730/MPA24_8 [Arabidopsis thaliana] >gi|110742367|dbj|BAE99106.1| xyloglucan endotransglycosylase - like protein [Arabidopsis thaliana]
Unigene18125_Taxus	59	RawIntensity-ye	18.71	0.01	-10.8696	1.08152e-19	1.86428e-18	-	-	-	gi|62421776|gb|AAX82553.1|/2e-12/120 kDa pistil extensin-like protein [Nicotiana langsdorffii]
Unigene9388_Taxus	59	RawIntensity-ye	18.71	0.01	-10.8696	1.08152e-19	1.86249e-18	-	-	-	gi|115434282|ref|NP_001041899.1|/1e-06/Os01g0126900 [Oryza sativa (japonica cultivar-group)] >gi|113531430|dbj|BAF03813.1| Os01g0126900 [Oryza sativa Japonica Group]
Unigene30389_Taxus	59	RawIntensity-ye	18.71	0.01	-10.8696	1.08152e-19	1.86071e-18	-	-	-	-
Unigene7022_Taxus	59	RawIntensity-ye	18.71	0.01	-10.8696	1.08152e-19	1.85894e-18	-	-	-	gi|115467082|ref|NP_001057140.1|/3e-40/Os06g0215600 [Oryza sativa (japonica cultivar-group)] >gi|113595180|dbj|BAF19054.1| Os06g0215600 [Oryza sativa Japonica Group]
Unigene19261_Taxus	57	RawIntensity-ye	18.08	0.01	-10.8202	4.74536e-19	7.95876e-18	-	-	-	gi|22208300|emb|CAD30841.1|/5e-06/soluble epoxide hydrolase [Brassica napus]
Unigene27202_Taxus	55	RawIntensity-ye	17.44	0.01	-10.7682	2.0821e-18	3.42187e-17	-	-	-	gi|75262337|sp|Q9FEL8.1|LAX1_MEDTR/4e-44/RecName: Full=Auxin transporter-like protein 1; AltName: Full=AUX1-like protein 1; AltName: Full=MtLAX1 >gi|28624758|gb|AAM55302.1| auxin influx carrier protein [Medicago truncatula]
Unigene29880_Taxus	55	RawIntensity-ye	17.44	0.01	-10.7682	2.0821e-18	3.41875e-17	GO:0016023//cytoplasmic membrane-bounded vesicle	-	-	gi|21726980|emb|CAD38276.1|/8e-22/pathogenesis related protein isoform b1 [Solanum phureja]
Unigene6093_Taxus	55	RawIntensity-ye	17.44	0.01	-10.7682	2.0821e-18	3.41563e-17	-	-	-	gi|152925780|gb|ABS32108.1|/7e-14/aldehyde oxidase 1 [Pisum sativum]
Unigene26646_Taxus	54	RawIntensity-ye	17.12	0.01	-10.7415	4.36132e-18	7.04545e-17	-	-	-	-
Unigene28660_Taxus	53	RawIntensity-ye	16.81	0.01	-10.7151	9.13556e-18	1.46136e-16	-	-	-	gi|224115584|ref|XP_002317072.1|/4e-14/cytochrome P450 [Populus trichocarpa] >gi|222860137|gb|EEE97684.1| cytochrome P450 [Populus trichocarpa]
Unigene9984_Taxus	53	RawIntensity-ye	16.81	0.01	-10.7151	9.13556e-18	1.46007e-16	-	-	-	gi|28866017|emb|CAD70172.1|/2e-38/farnesylated protein 2 [Hordeum vulgare subsp. vulgare]
Unigene35558_Taxus	52	RawIntensity-ye	16.49	0.01	-10.6874	1.9136e-17	3.01816e-16	-	-	-	gi|226499476|ref|NP_001149720.1|/5e-11/hybrid proline-rich protein1 [Zea mays] >gi|433707|emb|CAA42959.1| prolin rich protein [Zea mays] >gi|195629756|gb|ACG36519.1| 36.4 kDa proline-rich protein [Zea mays]
Unigene16930_Taxus	52	RawIntensity-ye	16.49	0.01	-10.6874	1.9136e-17	3.01552e-16	-	-	-	gi|115468730|ref|NP_001057964.1|/3e-12/Os06g0589800 [Oryza sativa (japonica cultivar-group)] >gi|113596004|dbj|BAF19878.1| Os06g0589800 [Oryza sativa Japonica Group]
Unigene15517_Taxus	52	RawIntensity-ye	16.49	0.01	-10.6874	1.9136e-17	3.01288e-16	-	-	-	gi|162955782|gb|ABY25275.1|/1e-153/cellulose synthase [Eucalyptus grandis]
Unigene6983_Taxus	52	RawIntensity-ye	16.49	0.01	-10.6874	1.9136e-17	3.01024e-16	-	-	-	gi|108706751|gb|ABF94546.1|/1e-07/acetyltransferase, GNAT family protein, expressed [Oryza sativa (japonica cultivar-group)]
Unigene25072_Taxus	51	RawIntensity-ye	16.17	0.01	-10.6591	4.00838e-17	6.23464e-16	-	-	-	gi|224108970|ref|XP_002315035.1|/5e-21/pho1-like protein [Populus trichocarpa] >gi|222864075|gb|EEF01206.1| pho1-like protein [Populus trichocarpa]
Unigene26613_Taxus	51	RawIntensity-ye	16.17	0.01	-10.6591	4.00838e-17	6.22926e-16	-	-	-	gi|115459178|ref|NP_001053189.1|/2e-18/Os04g0494800 [Oryza sativa (japonica cultivar-group)] >gi|113564760|dbj|BAF15103.1| Os04g0494800 [Oryza sativa Japonica Group]
Unigene25993_Taxus	51	RawIntensity-ye	16.17	0.01	-10.6591	4.00838e-17	6.22388e-16	-	-	-	-
Unigene32321_Taxus	51	RawIntensity-ye	16.17	0.01	-10.6591	4.00838e-17	6.21852e-16	-	-	-	gi|30025164|gb|AAP04432.1|/1e-25/lipoxygenase 1 protein [Hordeum vulgare]
Unigene29758_Taxus	51	RawIntensity-ye	16.17	0.01	-10.6591	4.00838e-17	6.21316e-16	GO:0005634//nucleus	GO:0003723//RNA binding;GO:0005515//protein binding	GO:0006364//rRNA processing	gi|255729116|ref|XP_002549483.1|/2e-41/fibrillarin [Candida tropicalis MYA-3404] >gi|240132552|gb|EER32109.1| fibrillarin [Candida tropicalis MYA-3404]
Unigene16355_Taxus	50	RawIntensity-ye	15.86	0.01	-10.6312	8.39624e-17	1.27833e-15	-	-	-	-
Unigene8110_Taxus	49	RawIntensity-ye	15.54	0.01	-10.6018	1.75874e-16	2.63972e-15	-	-	-	-
Unigene9332_Taxus	49	RawIntensity-ye	15.54	0.01	-10.6018	1.75874e-16	2.63752e-15	-	-	-	gi|255673520|dbj|BAH91219.1|/2e-08/Os01g0661650 [Oryza sativa Japonica Group]
Unigene25513_Taxus	49	RawIntensity-ye	15.54	0.01	-10.6018	1.75874e-16	2.63532e-15	-	-	-	gi|22329033|ref|NP_194781.2|/9e-34/leucine-rich repeat family protein / protein kinase family protein [Arabidopsis thaliana] >gi|224589641|gb|ACN59353.1| leucine-rich repeat receptor-like protein kinase [Arabidopsis thaliana]
Unigene27998_Taxus	48	RawIntensity-ye	15.22	0.01	-10.5718	3.68398e-16	5.46553e-15	-	-	-	-
Unigene33969_Taxus	48	RawIntensity-ye	15.22	0.01	-10.5718	3.68398e-16	5.46103e-15	-	-	-	gi|115438761|ref|NP_001043660.1|/2e-53/Os01g0634600 [Oryza sativa (japonica cultivar-group)] >gi|20161819|dbj|BAB90734.1| pectinesterase-like [Oryza sativa Japonica Group]
Unigene30072_Taxus	48	RawIntensity-ye	15.22	0.01	-10.5718	3.68398e-16	5.45654e-15	-	-	-	gi|224071101|ref|XP_002303357.1|/2e-11/aquaporin, MIP family, TIP subfamily [Populus trichocarpa] >gi|222840789|gb|EEE78336.1| aquaporin, MIP family, TIP subfamily [Populus trichocarpa]
Unigene14570_Taxus	48	RawIntensity-ye	15.22	0.01	-10.5718	3.68398e-16	5.45205e-15	-	-	-	gi|108706615|gb|ABF94410.1|/6e-08/expressed protein [Oryza sativa (japonica cultivar-group)]
Unigene30205_Taxus	47	RawIntensity-ye	14.9	0.01	-10.5411	7.71674e-16	1.12628e-14	-	-	-	gi|224087702|ref|XP_002308209.1|/3e-34/laccase 1d [Populus trichocarpa] >gi|222854185|gb|EEE91732.1| laccase 1d [Populus trichocarpa]
Unigene19827_Taxus	47	RawIntensity-ye	14.9	0.01	-10.5411	7.71674e-16	1.12537e-14	-	-	-	gi|14423859|sp|Q9M7M9.1|PROF4_HEVBR/1e-39/RecName: Full=Profilin-4; AltName: Full=Pollen allergen Hev b 8.0202; AltName: Allergen=Hev b 8.0202 >gi|6979169|gb|AAF34342.1|AF119366_1 latex profilin Hev b 8 [Hevea brasiliensis]
Unigene21817_Taxus	46	RawIntensity-ye	14.59	0.01	-10.5108	1.61641e-15	2.31599e-14	GO:0016021//integral to membrane	GO:0005215//transporter activity	GO:0006810//transport	gi|32363409|sp|Q9FY14.1|TIP1_MEDTR/1e-16/RecName: Full=Probable aquaporin TIP-type; AltName: Full=MtAQP1 >gi|9716259|emb|CAC01618.1| aquaporin [Medicago truncatula]
Unigene31455_Taxus	46	RawIntensity-ye	14.59	0.01	-10.5108	1.61641e-15	2.31415e-14	-	-	-	-
Unigene1885_Taxus	46	RawIntensity-ye	14.59	0.01	-10.5108	1.61641e-15	2.31231e-14	GO:0016020//membrane	GO:0016887//ATPase activity;GO:0005515//protein binding;GO:0000166//nucleotide binding	-	gi|224065781|ref|XP_002301961.1|/4e-17/multidrug/pheromone exporter, MDR family, ABC transporter family [Populus trichocarpa] >gi|222843687|gb|EEE81234.1| multidrug/pheromone exporter, MDR family, ABC transporter family [Populus trichocarpa]
Unigene21098_Taxus	46	RawIntensity-ye	14.59	0.01	-10.5108	1.61641e-15	2.31047e-14	-	-	-	gi|40539008|gb|AAR87265.1|/1e-90/expressed protein [Oryza sativa Japonica Group] >gi|108711109|gb|ABF98904.1| expressed protein [Oryza sativa (japonica cultivar-group)]
Unigene12429_Taxus	45	RawIntensity-ye	14.27	0.01	-10.4788	3.38584e-15	4.74545e-14	GO:0016023//cytoplasmic membrane-bounded vesicle	-	-	gi|18400323|ref|NP_566483.1|/1e-55/subtilase family protein [Arabidopsis thaliana] >gi|9279572|dbj|BAB01030.1| subtilisin proteinase-like protein [Arabidopsis thaliana]
Unigene11904_Taxus	45	RawIntensity-ye	14.27	0.01	-10.4788	3.38584e-15	4.74176e-14	-	-	-	gi|4049410|emb|CAA71274.1|/1e-122/L-ascorbate oxidase [Cucumis melo]
Unigene11491_Taxus	45	RawIntensity-ye	14.27	0.01	-10.4788	3.38584e-15	4.73807e-14	-	-	-	gi|461532|sp|P34727.3|ARF_AJECA/3e-11/RecName: Full=ADP-ribosylation factor >gi|407693|gb|AAA17548.1| ADP-ribosylation factor [Ajellomyces capsulatus] >gi|240278839|gb|EER42345.1| ADP-ribosylation factor [Ajellomyces capsulatus H143]
Unigene27544_Taxus	45	RawIntensity-ye	14.27	0.01	-10.4788	3.38584e-15	4.73439e-14	-	-	-	gi|115479153|ref|NP_001063170.1|/2e-13/Os09g0414900 [Oryza sativa (japonica cultivar-group)] >gi|113631403|dbj|BAF25084.1| Os09g0414900 [Oryza sativa Japonica Group]
Unigene9081_Taxus	45	RawIntensity-ye	14.27	0.01	-10.4788	3.38584e-15	4.73071e-14	-	-	-	gi|55700879|tpe|CAH69249.1|/3e-77/TPA: class III peroxidase 6 precursor [Oryza sativa (japonica cultivar-group)]
Unigene7596_Taxus	45	RawIntensity-ye	14.27	0.01	-10.4788	3.38584e-15	4.72704e-14	-	-	-	gi|224142367|ref|XP_002324530.1|/2e-37/hydroxycinnamoyl CoA shikimate/quinate hydroxycinnamoyltransferase [Populus trichocarpa] >gi|222865964|gb|EEF03095.1| hydroxycinnamoyl CoA shikimate/quinate hydroxycinnamoyltransferase [Populus trichocarpa]
Unigene29311_Taxus	45	RawIntensity-ye	14.27	0.01	-10.4788	3.38584e-15	4.72338e-14	-	-	-	gi|226289773|gb|EEH45257.1|/3e-45/40S ribosomal protein S3 [Paracoccidioides brasiliensis Pb18]
Unigene12449_Taxus	45	RawIntensity-ye	14.27	0.01	-10.4788	3.38584e-15	4.71972e-14	-	GO:0003677//DNA binding;GO:0005515//protein binding	-	gi|239819336|gb|ACS28250.1|/1e-81/BREVIPEDICELLUS [Brassica oleracea]
Unigene34148_Taxus	44	RawIntensity-ye	13.95	0.01	-10.446	7.09226e-15	9.61811e-14	-	-	-	gi|115464635|ref|NP_001055917.1|/7e-23/Os05g0493100 [Oryza sativa (japonica cultivar-group)] >gi|113579468|dbj|BAF17831.1| Os05g0493100 [Oryza sativa Japonica Group]
Unigene34979_Taxus	44	RawIntensity-ye	13.95	0.01	-10.446	7.09226e-15	9.61087e-14	-	-	-	gi|159469568|ref|XP_001692935.1|/1e-102/cullin [Chlamydomonas reinhardtii] >gi|158277737|gb|EDP03504.1| cullin [Chlamydomonas reinhardtii]
Unigene17807_Taxus	43	RawIntensity-ye	13.64	0.01	-10.4136	1.4856e-14	1.98035e-13	-	-	-	gi|51475032|gb|AAU04555.1|/7e-29/laccase-like multicopper oxidase 77 [Brassica napus]
Unigene4244_Taxus	43	RawIntensity-ye	13.64	0.01	-10.4136	1.4856e-14	1.97889e-13	-	-	-	gi|205933563|gb|ACI05085.1|/1e-100/receptor-like protein kinase RHG1 [Glycine max]
Unigene27520_Taxus	43	RawIntensity-ye	13.64	0.01	-10.4136	1.4856e-14	1.97742e-13	-	-	-	gi|159488703|ref|XP_001702342.1|/2e-29/ribosomal protein S7, component of cytosolic 80S ribosome and 40S small subunit [Chlamydomonas reinhardtii] >gi|158271136|gb|EDO96962.1| ribosomal protein S7 [Chlamydomonas reinhardtii]
Unigene4962_Taxus	2484	RawIntensity-ye	787.69	0.58	-10.4074	0	0	-	-	-	-
Unigene19945_Taxus	42	RawIntensity-ye	13.32	0.01	-10.3794	3.11184e-14	3.98581e-13	-	-	-	gi|226498282|ref|NP_001148036.1|/7e-13/EARLY flowering 4 protein [Zea mays] >gi|195615426|gb|ACG29543.1| EARLY flowering 4 protein [Zea mays]
Unigene7167_Taxus	42	RawIntensity-ye	13.32	0.01	-10.3794	3.11184e-14	3.98298e-13	-	-	-	gi|255071305|ref|XP_002507734.1|/5e-50/nucleolar RNA binding protein [Micromonas sp. RCC299] >gi|226523009|gb|ACO68992.1| nucleolar RNA binding protein [Micromonas sp. RCC299]
Unigene11961_Taxus	42	RawIntensity-ye	13.32	0.01	-10.3794	3.11184e-14	3.98015e-13	-	-	-	gi|226531952|ref|NP_001149536.1|/9e-06/src2-like protein [Zea mays] >gi|195627870|gb|ACG35765.1| src2-like protein [Zea mays]
Unigene17120_Taxus	42	RawIntensity-ye	13.32	0.01	-10.3794	3.11184e-14	3.97732e-13	-	-	-	-
Unigene25070_Taxus	42	RawIntensity-ye	13.32	0.01	-10.3794	3.11184e-14	3.9745e-13	-	-	-	gi|270268063|gb|ACZ65574.1|/1e-27/vacuolar H+-ATPase 16kDa subunit c [Iris lactea var. chinensis]
Unigene32824_Taxus	41	RawIntensity-ye	13	0.01	-10.3443	6.5183e-14	8.05102e-13	-	-	-	gi|115479519|ref|NP_001063353.1|/7e-31/Os09g0454600 [Oryza sativa (japonica cultivar-group)] >gi|113631586|dbj|BAF25267.1| Os09g0454600 [Oryza sativa Japonica Group]
Unigene28693_Taxus	41	RawIntensity-ye	13	0.01	-10.3443	6.5183e-14	8.0455e-13	-	-	-	gi|559407|emb|CAA57285.1|/1e-39/ACC oxidase [Brassica oleracea]
Unigene18951_Taxus	41	RawIntensity-ye	13	0.01	-10.3443	6.5183e-14	8.03998e-13	-	-	-	-
Unigene19383_Taxus	41	RawIntensity-ye	13	0.01	-10.3443	6.5183e-14	8.03447e-13	-	-	-	gi|110739601|dbj|BAF01709.1|/1e-88/receptor-kinase isolog [Arabidopsis thaliana] >gi|110739682|dbj|BAF01748.1| receptor-kinase isolog [Arabidopsis thaliana] >gi|110739766|dbj|BAF01790.1| receptor-kinase isolog [Arabidopsis thaliana]
Unigene6778_Taxus	40	RawIntensity-ye	12.68	0.01	-10.3083	1.36537e-13	1.56008e-12	-	-	-	gi|255678056|dbj|BAF22510.2|/8e-11/Os07g0671100 [Oryza sativa Japonica Group]
Unigene33284_Taxus	40	RawIntensity-ye	12.68	0.01	-10.3083	1.36537e-13	1.55909e-12	-	GO:0005515//protein binding;GO:0005524//ATP binding;GO:0004674//protein serine/threonine kinase activity	GO:0006468//protein amino acid phosphorylation	gi|26051191|gb|AAB52224.3|/6e-83/StubSNF1 protein [Solanum tuberosum]
Unigene4931_Taxus	40	RawIntensity-ye	12.68	0.01	-10.3083	1.36537e-13	1.5581e-12	-	-	-	gi|224053527|ref|XP_002297857.1|/1e-151/serine/threonine protein kinase PBS1 [Populus trichocarpa] >gi|222845115|gb|EEE82662.1| serine/threonine protein kinase PBS1 [Populus trichocarpa]
Unigene9572_Taxus	40	RawIntensity-ye	12.68	0.01	-10.3083	1.36537e-13	1.55711e-12	-	-	-	gi|90186655|gb|ABD91577.1|/1e-102/beta-1,3-glucanase [Medicago sativa]
Unigene28859_Taxus	40	RawIntensity-ye	12.68	0.01	-10.3083	1.36537e-13	1.55612e-12	-	-	-	gi|288559156|sp|C5XEK4.1|U4974_SORBI/5e-06/RecName: Full=UPF0497 membrane protein Sb03g029220
Unigene10052_Taxus	39	RawIntensity-ye	12.37	0.01	-10.2726	2.86e-13	3.09678e-12	-	-	-	gi|195657747|gb|ACG48341.1|/3e-20/DREPP4 protein [Zea mays]
Unigene7160_Taxus	39	RawIntensity-ye	12.37	0.01	-10.2726	2.86e-13	3.09492e-12	-	-	-	-
Unigene21730_Taxus	39	RawIntensity-ye	12.37	0.01	-10.2726	2.86e-13	3.09306e-12	GO:0016023//cytoplasmic membrane-bounded vesicle;GO:0005634//nucleus	-	GO:0006333//chromatin assembly or disassembly	gi|74608690|sp|Q6FL84.1|ASF1_CANGA/4e-18/RecName: Full=Histone chaperone ASF1; AltName: Full=Anti-silencing function protein 1
Unigene33764_Taxus	39	RawIntensity-ye	12.37	0.01	-10.2726	2.86e-13	3.0912e-12	-	-	-	gi|15235160|ref|NP_193708.1|/1e-23/glycosyl hydrolase family 18 protein [Arabidopsis thaliana] >gi|67633752|gb|AAY78800.1| glycosyl hydrolase family 18 protein [Arabidopsis thaliana]
Unigene28326_Taxus	39	RawIntensity-ye	12.37	0.01	-10.2726	2.86e-13	3.08935e-12	-	-	-	gi|34485633|gb|AAQ73203.1|/2e-42/SAT5 [Pisum sativum]
Unigene17269_Taxus	39	RawIntensity-ye	12.37	0.01	-10.2726	2.86e-13	3.0875e-12	-	-	-	gi|38605591|sp|Q8LNZ5.1|XTHB_PHAAN/6e-88/RecName: Full=Probable xyloglucan endotransglucosylase/hydrolase protein B; AltName: Full=VaXTH2; Flags: Precursor >gi|21734666|dbj|BAC03238.1| xyloglucan endotransglucosylase/hydrolase [Vigna angularis]
[truncated: 2,688 more rows]
