# Supplementary material for: The First Insight into the Tissue Specific Taxus Transcriptome via Illumina Second Generation Sequencing
Source: PLoS One. 2011 Jun 22;6(6):e21220. doi: 10.1371/journal.pone.0021220 (PMC3120849; doi:10.1371/journal.pone.0021220)
Supplement: Table S6 — Differentially expressed genes between root and stem. (XLS) [file pone.0021220.s006.xls]

## Sheet: genvsjing.DiffGeneExpFilter
Table S6 Differentially expressed genes between root and stem
Gene	RawIntensity-root	RawIntensity-stem	TPM-root	TPM-stem	log2 Ratio(stem/root)	P-Value	FDR	GO Component	GO Function	GO Process	blast nr
Unigene14556_Taxus	0	3556	0.01	1059.43	16.6929	0	0	-	-	-	gi|121663827|dbj|BAF44533.1|/4e-14/class IV chitinase [Nicotiana tabacum]
Unigene29919_Taxus	0	892	0.01	265.75	14.6978	0	0	GO:0016021//integral to membrane;GO:0009579//thylakoid;GO:0009538//photosystem I reaction center;GO:0009507//chloroplast	-	GO:0015979//photosynthesis	gi|119358797|emb|CAL52060.2|/3e-12/PsaL photosystem I subunit XI precursor (IC) [Ostreococcus tauri]
Unigene30337_Taxus	0	596	0.01	177.56	14.116	0	0	-	-	-	gi|216296854|gb|ACJ72160.1|/6e-36/UGT3 [Pueraria montana var. lobata]
Unigene6876_Taxus	0	578	0.01	172.2	14.0718	0	0	-	-	-	-
Unigene15466_Taxus	0	569	0.01	169.52	14.0492	0	0	-	-	-	gi|159482576|ref|XP_001699345.1|/1e-44/flavoprotein [Chlamydomonas reinhardtii] >gi|158272981|gb|EDO98775.1| flavoprotein [Chlamydomonas reinhardtii]
Unigene7649_Taxus	0	566	0.01	168.63	14.0416	0	0	-	-	-	gi|115476576|ref|NP_001061884.1|/2e-08/Os08g0435900 [Oryza sativa (japonica cultivar-group)] >gi|113623853|dbj|BAF23798.1| Os08g0435900 [Oryza sativa Japonica Group]
Unigene20817_Taxus	0	556	0.01	165.65	14.0159	0	0	-	-	-	gi|7228236|emb|CAA16760.2|/2e-66/nodulin-26-like protein [Arabidopsis thaliana] >gi|7268698|emb|CAB78905.1| nodulin-26-like protein [Arabidopsis thaliana]
Unigene12662_Taxus	0	551	0.01	164.16	14.0028	0	0	-	-	GO:0009409//response to cold	gi|193806744|sp|Q9LPK5.2|CML44_ARATH/1e-17/RecName: Full=Probable calcium-binding protein CML44; AltName: Full=Calmodulin-like protein 44
Unigene31405_Taxus	0	436	0.01	129.9	13.6651	0	0	-	-	-	gi|119514172|gb|ABL75837.1|/1e-12/PGR5 [Porphyra yezoensis]
Unigene29867_Taxus	0	341	0.01	101.59	13.3105	0	0	-	GO:0016851//magnesium chelatase activity	GO:0015995//chlorophyll biosynthetic process	gi|116057194|emb|CAL51621.1|/2e-18/Magnesium chelatase H subunit (ISS) [Ostreococcus tauri]
Unigene25613_Taxus	0	332	0.01	98.91	13.2719	0	0	-	-	-	-
Unigene22086_Taxus	0	293	0.01	87.29	13.0916	0	0	-	-	-	-
Unigene21105_Taxus	0	236	0.01	70.31	12.7795	0	0	-	-	-	gi|224059654|ref|XP_002299954.1|/3e-30/cytochrome P450 [Populus trichocarpa] >gi|222847212|gb|EEE84759.1| cytochrome P450 [Populus trichocarpa]
Unigene30417_Taxus	0	204	0.01	60.78	12.5694	0	0	-	-	-	gi|164519779|gb|ABY59947.1|/2e-09/nectar protein 1 [Jacaranda mimosifolia]
Unigene23331_Taxus	0	196	0.01	58.39	12.5115	0	0	-	-	-	-
Unigene27777_Taxus	0	195	0.01	58.1	12.5043	0	0	-	-	-	gi|108859343|emb|CAK26119.1|/3e-15/constans-like 1 [Picea abies]
Unigene35951_Taxus	0	194	0.01	57.8	12.4969	0	0	-	-	-	gi|21952855|dbj|BAC06270.1|/7e-15/P0696G06.27 [Oryza sativa Japonica Group]
Unigene14047_Taxus	0	193	0.01	57.5	12.4893	0	0	-	-	-	gi|71726948|gb|AAZ39645.1|/1e-116/cytochrome P450 monooxygenase [Petunia x hybrida]
Unigene36015_Taxus	0	191	0.01	56.9	12.4742	0	0	-	-	-	gi|255087290|ref|XP_002505568.1|/1e-127/Fructose-1,6-bisphosphatase [Micromonas sp. RCC299] >gi|226520838|gb|ACO66826.1| Fructose-1,6-bisphosphatase [Micromonas sp. RCC299]
Unigene33632_Taxus	0	187	0.01	55.71	12.4437	0	0	-	-	-	gi|16604344|gb|AAL24178.1|/3e-23/AT5g16970/F2K13_120 [Arabidopsis thaliana]
Unigene17272_Taxus	0	185	0.01	55.12	12.4284	0	0	-	-	-	gi|227204195|dbj|BAH56949.1|/6e-57/AT1G22360 [Arabidopsis thaliana]
Unigene8772_Taxus	0	158	0.01	47.07	12.2006	0	0	-	-	-	gi|79568805|ref|NP_181242.3|/8e-42/kinase [Arabidopsis thaliana]
Unigene11032_Taxus	0	152	0.01	45.28	12.1447	0	0	-	-	-	-
Unigene33470_Taxus	0	147	0.01	43.8	12.0967	0	0	-	GO:0016747//transferase activity, transferring acyl groups other than amino-acyl groups	-	gi|15241431|ref|NP_196403.1|/1e-23/transferase family protein [Arabidopsis thaliana] >gi|6562300|emb|CAB62598.1| N-hydroxycinnamoyl/benzoyltransferase-like protein [Arabidopsis thaliana] >gi|10176720|dbj|BAB09950.1| N-hydroxycinnamoyl/benzoyltransferase-like protein [Arabidopsis thaliana] >gi|17065196|gb|AAL32752.1| N-hydroxycinnamoyl/benzoyltransferase-like protein [Arabidopsis thaliana] >gi|231…
Unigene28711_Taxus	0	141	0.01	42.01	12.0365	0	0	-	-	-	-
Unigene32679_Taxus	0	132	0.01	39.33	11.9414	0	0	-	-	-	gi|109729914|tpg|DAA05771.1|/6e-11/TPA: TPA_inf: class IV HD-Zip protein HDZ41 [Selaginella moellendorffii]
Unigene31596_Taxus	0	127	0.01	37.84	11.8857	0	0	-	-	-	gi|6730643|gb|AAF27064.1|AC008262_13/2e-13/F4N2.19 [Arabidopsis thaliana]
Unigene29591_Taxus	0	126	0.01	37.54	11.8742	0	0	-	-	-	-
Unigene13062_Taxus	0	120	0.01	35.75	11.8037	0	0	-	-	-	gi|493723|emb|CAA45523.1|/9e-07/photosystem I light-harvesting chlorophyll a/b-binding protein [Nicotiana tabacum]
Unigene11637_Taxus	0	110	0.01	32.77	11.6782	0	0	-	-	-	gi|148905856|gb|ABR16090.1|/3e-18/unknown [Picea sitchensis]
Unigene27850_Taxus	0	110	0.01	32.77	11.6782	0	0	-	-	-	gi|125578|sp|P27774.1|KPPR_MESCR/2e-47/RecName: Full=Phosphoribulokinase, chloroplastic; Short=PRKase; Short=PRK; AltName: Full=Phosphopentokinase; Flags: Precursor >gi|167266|gb|AAA33034.1| phosphoribulokinase [Mesembryanthemum crystallinum]
Unigene20421_Taxus	0	104	0.01	30.98	11.5971	0	0	-	-	-	-
Unigene27712_Taxus	0	100	0.01	29.79	11.5406	0	0	-	-	-	-
Unigene18420_Taxus	0	99	0.01	29.49	11.526	0	0	-	-	-	gi|116782253|gb|ABK22432.1|/5e-08/unknown [Picea sitchensis] >gi|116783467|gb|ABK22954.1| unknown [Picea sitchensis] >gi|116784816|gb|ABK23482.1| unknown [Picea sitchensis]
Unigene3520_Taxus	0	89	0.01	26.52	11.3729	0	0	-	-	-	-
Unigene24936_Taxus	0	87	0.01	25.92	11.3399	0	0	-	-	-	gi|2150134|gb|AAB71136.1|/1e-12/acid invertase [Asparagus officinalis]
Unigene18068_Taxus	0	85	0.01	25.32	11.3061	0	0	-	-	-	gi|17433068|sp|Q9M9B3.1|COL8_ARATH/1e-11/RecName: Full=Zinc finger protein CONSTANS-LIKE 8 >gi|7770330|gb|AAF69700.1|AC016041_5 F27J15.10 [Arabidopsis thaliana]
Unigene3434_Taxus	0	83	0.01	24.73	11.272	0	0	-	-	-	gi|62511235|sp|Q9M7D1.1|TPSD8_ABIGR/6e-12/RecName: Full=Beta-phellandrene synthase, chloroplastic; AltName: Full=(-)-(4S)-beta-phellandrene synthase; AltName: Full=Agg-Bphe; Flags: Precursor >gi|7381249|gb|AAF61453.1|AF139205_1 beta-phellandrene synthase [Abies grandis]
Unigene35302_Taxus	0	82	0.01	24.43	11.2544	0	0	-	-	-	gi|115476980|ref|NP_001062086.1|/3e-48/Os08g0485000 [Oryza sativa (japonica cultivar-group)] >gi|113624055|dbj|BAF24000.1| Os08g0485000 [Oryza sativa Japonica Group]
Unigene19623_Taxus	0	78	0.01	23.24	11.1824	0	0	-	-	-	gi|207345222|gb|EDZ72112.1|/9e-06/YGR023Wp-like protein [Saccharomyces cerevisiae AWRI1631]
Unigene28791_Taxus	0	78	0.01	23.24	11.1824	0	0	-	-	-	gi|115439941|ref|NP_001044250.1|/4e-21/Os01g0750000 [Oryza sativa (japonica cultivar-group)] >gi|14209558|dbj|BAB56054.1| GTP-binding protein GTP1 [Oryza sativa Japonica Group] >gi|32966065|gb|AAP92129.1| GTP-binding protein GTP1 [Oryza sativa] >gi|113533781|dbj|BAF06164.1| Os01g0750000 [Oryza sativa Japonica Group]
Unigene29840_Taxus	0	77	0.01	22.94	11.1636	0	0	-	-	-	gi|255078442|ref|XP_002502801.1|/5e-06/photosystem II PsbY protein [Micromonas sp. RCC299] >gi|226518067|gb|ACO64059.1| photosystem II PsbY protein [Micromonas sp. RCC299]
Unigene21334_Taxus	0	77	0.01	22.94	11.1636	0	0	-	-	-	gi|108709892|gb|ABF97687.1|/6e-07/expressed protein [Oryza sativa (japonica cultivar-group)]
Unigene35821_Taxus	0	73	0.01	21.75	11.0868	0	0	-	-	-	gi|108706386|gb|ABF94181.1|/2e-31/expressed protein [Oryza sativa (japonica cultivar-group)]
Unigene34994_Taxus	0	72	0.01	21.45	11.0668	0	0	-	-	-	gi|115470375|ref|NP_001058786.1|/5e-38/Os07g0121200 [Oryza sativa (japonica cultivar-group)]
Unigene15066_Taxus	0	68	0.01	20.26	10.9844	0	0	-	-	-	-
Unigene17831_Taxus	0	67	0.01	19.96	10.9629	0	0	-	-	-	gi|115454045|ref|NP_001050623.1|/2e-79/Os03g0602300 [Oryza sativa (japonica cultivar-group)] >gi|62510495|sp|Q8GSQ1.1|C85A1_ORYSJ RecName: Full=Cytochrome P450 85A1; AltName: Full=C6-oxidase; AltName: Full=Dwarf protein; AltName: Full=OsDWARF >gi|27127269|dbj|BAC45000.1| cytochrome P450 [Oryza sativa Japonica Group] >gi|50838910|gb|AAT81671.1| cytochrome P450 [Oryza sativa Japonica Group] >gi|113…
Unigene28099_Taxus	0	66	0.01	19.66	10.941	0	0	-	-	-	-
Unigene3276_Taxus	0	66	0.01	19.66	10.941	0	0	-	-	-	gi|16588843|gb|AAL26915.1|AF323593_1/1e-11/thioredoxin H [Prunus persica]
Unigene10276_Taxus	0	65	0.01	19.37	10.9196	0	0	-	-	-	gi|90962944|gb|ABE02396.1|/7e-08/At3g52070 [Arabidopsis thaliana]
Unigene32443_Taxus	0	65	0.01	19.37	10.9196	0	0	-	-	-	-
Unigene18889_Taxus	0	63	0.01	18.77	10.8742	0	0	-	-	-	gi|149391193|gb|ABR25614.1|/2e-53/zn-dependent hydrolase [Oryza sativa Indica Group]
Unigene4600_Taxus	0	62	0.01	18.47	10.851	0	0	GO:0016020//membrane	GO:0016887//ATPase activity;GO:0000166//nucleotide binding	-	gi|24324262|gb|AAN28720.2|/0.0/MDR-like p-glycoprotein [Arabidopsis thaliana]
Unigene24440_Taxus	0	60	0.01	17.88	10.8041	0	0	-	-	-	-
Unigene31714_Taxus	0	58	0.01	17.28	10.7549	0	0	-	-	-	-
Unigene33714_Taxus	0	57	0.01	16.98	10.7296	0	0	-	-	-	gi|1723378|sp|P51202.1|YCF53_PORPU/2e-11/RecName: Full=Uncharacterized protein ycf53; AltName: Full=ORF238 >gi|1276668|gb|AAC08088.1| ORF238 [Porphyra purpurea]
Unigene4615_Taxus	0	55	0.01	16.39	10.6786	0	0	-	-	-	gi|115487254|ref|NP_001066114.1|/2e-11/Os12g0138600 [Oryza sativa (japonica cultivar-group)] >gi|113648621|dbj|BAF29133.1| Os12g0138600 [Oryza sativa Japonica Group]
Unigene1052_Taxus	0	55	0.01	16.39	10.6786	0	0	-	-	-	gi|195622122|gb|ACG32891.1|/6e-38/yabby15 protein [Zea mays]
Unigene12825_Taxus	0	54	0.01	16.09	10.6519	0	0	-	-	-	gi|115475672|ref|NP_001061432.1|/1e-147/Os08g0276100 [Oryza sativa (japonica cultivar-group)] >gi|113623401|dbj|BAF23346.1| Os08g0276100 [Oryza sativa Japonica Group]
Unigene16061_Taxus	0	54	0.01	16.09	10.6519	0	0	-	-	-	gi|224093838|ref|XP_002310014.1|/3e-27/cytochrome P450 [Populus trichocarpa] >gi|222852917|gb|EEE90464.1| cytochrome P450 [Populus trichocarpa]
Unigene24163_Taxus	0	53	0.01	15.79	10.6248	0	0	-	-	-	-
Unigene35258_Taxus	0	53	0.01	15.79	10.6248	0	0	-	-	-	gi|195610982|gb|ACG27321.1|/9e-40/putativ eribonuclease P [Zea mays]
Unigene6456_Taxus	0	53	0.01	15.79	10.6248	0	0	-	-	-	gi|84514135|gb|ABC59076.1|/7e-83/cytochrome P450 monooxygenase CYP716A12 [Medicago truncatula]
Unigene11907_Taxus	0	52	0.01	15.49	10.5971	4.4409e-16	8.41645e-15	-	-	-	gi|115486805|ref|NP_001068546.1|/3e-22/Os11g0704700 [Oryza sativa (japonica cultivar-group)] >gi|77552711|gb|ABA95508.1| RNA recognition motif family protein, expressed [Oryza sativa (japonica cultivar-group)] >gi|113645768|dbj|BAF28909.1| Os11g0704700 [Oryza sativa Japonica Group]
Unigene6290_Taxus	0	49	0.01	14.6	10.5118	7.54952e-15	1.31728e-13	-	-	-	gi|18086420|gb|AAL57666.1|/1e-15/AT5g53140/MFH8_8 [Arabidopsis thaliana] >gi|22137282|gb|AAM91486.1| AT5g53140/MFH8_8 [Arabidopsis thaliana]
Unigene19950_Taxus	0	49	0.01	14.6	10.5118	7.54952e-15	1.316e-13	-	-	-	gi|21617968|gb|AAM67018.1|/3e-08/thioredoxin [Arabidopsis thaliana]
Unigene1317_Taxus	0	49	0.01	14.6	10.5118	7.54952e-15	1.31471e-13	-	-	-	gi|75264583|sp|Q9M210.1|ERF35_ARATH/4e-23/RecName: Full=Ethylene-responsive transcription factor ERF035 >gi|7287997|emb|CAB81835.1| transcription factor-like protein [Arabidopsis thaliana] >gi|117958769|gb|ABK59687.1| At3g60490 [Arabidopsis thaliana]
Unigene30081_Taxus	0	48	0.01	14.3	10.4818	1.53211e-14	2.60195e-13	-	-	-	gi|162463521|ref|NP_001105345.1|/5e-27/ferredoxin-1, chloroplastic precursor [Zea mays] >gi|119928|sp|P27787.1|FER1_MAIZE RecName: Full=Ferredoxin-1, chloroplastic; AltName: Full=Ferredoxin I; Short=Fd I; Flags: Precursor >gi|168469|gb|AAA33459.1| ferredoxin [Zea mays] >gi|168471|gb|AAA33460.1| ferredoxin [Zea mays] >gi|444685|prf||1907324B ferredoxin:ISOTYPE=I
Unigene36108_Taxus	0	46	0.01	13.7	10.42	5.9508e-14	9.52502e-13	-	-	-	gi|79319580|ref|NP_001031160.1|/7e-13/zinc finger (B-box type) family protein [Arabidopsis thaliana] >gi|222424187|dbj|BAH20052.1| AT1G49130 [Arabidopsis thaliana]
Unigene12776_Taxus	0	46	0.01	13.7	10.42	5.9508e-14	9.51647e-13	-	-	-	gi|71660782|sp|Q9ZPX0.1|GAT15_ARATH/6e-10/RecName: Full=GATA transcription factor 15 >gi|119360065|gb|ABL66761.1| At2g18380 [Arabidopsis thaliana]
Unigene35773_Taxus	0	46	0.01	13.7	10.42	5.9508e-14	9.50794e-13	-	-	-	gi|126635887|gb|ABO21830.1|/1e-42/UDP rhamnose:anthocyanidin-3-glucoside rhamnosyltransferase [Petunia axillaris]
Unigene35215_Taxus	0	45	0.01	13.41	10.3891	1.16129e-13	1.76072e-12	-	-	-	gi|115439139|ref|NP_001043849.1|/1e-17/Os01g0676200 [Oryza sativa (japonica cultivar-group)] >gi|113533380|dbj|BAF05763.1| Os01g0676200 [Oryza sativa Japonica Group]
Unigene30325_Taxus	0	44	0.01	13.11	10.3565	2.2582e-13	3.30294e-12	-	-	-	-
Unigene33247_Taxus	0	44	0.01	13.11	10.3565	2.2582e-13	3.30023e-12	GO:0005634//nucleus	GO:0030528//transcription regulator activity	GO:0045449//regulation of transcription	gi|115440839|ref|NP_001044699.1|/3e-06/Os01g0831000 [Oryza sativa (japonica cultivar-group)] >gi|68565366|sp|Q7XAQ6.1|LAX_ORYSJ RecName: Full=Transcription factor LAX PANICLE >gi|33342172|dbj|BAC80247.1| transcription factor [Oryza sativa Japonica Group] >gi|56785174|dbj|BAD81850.1| transcription factor [Oryza sativa Japonica Group] >gi|113534230|dbj|BAF06613.1| Os01g0831000 [Oryza sativa Japonic…
Unigene22775_Taxus	0	43	0.01	12.81	10.3231	4.38538e-13	6.13712e-12	-	-	-	-
Unigene15635_Taxus	0	42	0.01	12.51	10.2889	8.51096e-13	1.15743e-11	-	-	-	gi|18416614|ref|NP_567728.1|/2e-06/AtGDU2 (Arabidopsis thaliana GLUTAMINE DUMPER 2)
Unigene23555_Taxus	0	41	0.01	12.21	10.2538	1.65112e-12	2.15968e-11	-	-	-	gi|9759597|dbj|BAB11454.1|/2e-07/unnamed protein product [Arabidopsis thaliana]
Unigene20595_Taxus	0	41	0.01	12.21	10.2538	1.65112e-12	2.15809e-11	-	-	-	-
Unigene35675_Taxus	0	41	0.01	12.21	10.2538	1.65112e-12	2.15651e-11	-	-	-	gi|116780545|gb|ABK21717.1|/2e-92/unknown [Picea sitchensis]
Unigene14771_Taxus	0	41	0.01	12.21	10.2538	1.65112e-12	2.15493e-11	-	-	-	-
Unigene4146_Taxus	0	41	0.01	12.21	10.2538	1.65112e-12	2.15335e-11	-	-	-	gi|224122352|ref|XP_002330602.1|/5e-09/predicted protein [Populus trichocarpa] >gi|222872160|gb|EEF09291.1| predicted protein [Populus trichocarpa]
Unigene36305_Taxus	0	40	0.01	11.92	10.2192	3.20278e-12	4.04663e-11	-	-	-	gi|195633101|gb|ACG36734.1|/2e-24/hydrolase, alpha/beta fold family protein [Zea mays]
Unigene149_Taxus	0	40	0.01	11.92	10.2192	3.20278e-12	4.04377e-11	-	-	-	gi|113205376|gb|AAU93592.2|/8e-06/uncharacterized plant-specific domain TIGR01589 family protein [Solanum demissum]
Unigene20172_Taxus	0	39	0.01	11.62	10.1824	6.21236e-12	7.64318e-11	GO:0016020//membrane;GO:0005739//mitochondrion	-	GO:0006810//transport	gi|30696976|ref|NP_851209.1|/1e-114/ATCNGC5 (CYCLIC NUCLEOTIDE GATED CHANNEL 5); calmodulin binding / cyclic nucleotide binding / potassium channel [Arabidopsis thaliana] >gi|42568613|ref|NP_200602.2| ATCNGC5 (CYCLIC NUCLEOTIDE GATED CHANNEL 5); calmodulin binding / cyclic nucleotide binding / potassium channel [Arabidopsis thaliana] >gi|38503077|sp|Q8RWS9.1|CNGC5_ARATH RecName: Full=Probable cyc…
Unigene33885_Taxus	0	39	0.01	11.62	10.1824	6.21236e-12	7.6379e-11	-	-	-	-
Unigene11010_Taxus	0	38	0.01	11.32	10.1447	1.20495e-11	1.4349e-10	-	-	-	gi|15235567|ref|NP_195463.1|/1e-05/hydrolase, alpha/beta fold family protein [Arabidopsis thaliana]
Unigene13962_Taxus	0	38	0.01	11.32	10.1447	1.20495e-11	1.43394e-10	-	-	-	gi|115451799|ref|NP_001049500.1|/9e-06/Os03g0238600 [Oryza sativa (japonica cultivar-group)] >gi|113547971|dbj|BAF11414.1| Os03g0238600 [Oryza sativa Japonica Group]
Unigene31969_Taxus	0	37	0.01	11.02	10.1059	2.33704e-11	2.71942e-10	-	-	-	gi|226499062|ref|NP_001147592.1|/9e-06/LOC100281201 [Zea mays] >gi|195612388|gb|ACG28024.1| RPT2-like protein [Zea mays]
Unigene35790_Taxus	0	37	0.01	11.02	10.1059	2.33704e-11	2.71765e-10	-	-	-	gi|255675993|dbj|BAH92932.1|/1e-06/Os05g0131300 [Oryza sativa Japonica Group]
Unigene17446_Taxus	0	36	0.01	10.73	10.0674	4.53278e-11	5.11733e-10	-	-	-	-
Unigene36022_Taxus	0	36	0.01	10.73	10.0674	4.53278e-11	5.11409e-10	-	-	-	gi|24431602|gb|AAN61482.1|/1e-72/Hypothetical protein [Oryza sativa Japonica Group]
Unigene16433_Taxus	0	36	0.01	10.73	10.0674	4.53278e-11	5.11085e-10	-	-	-	gi|4097573|gb|AAD09515.1|/1e-25/GMFP7 [Glycine max]
Unigene16709_Taxus	0	35	0.01	10.43	10.0265	8.79144e-11	9.61446e-10	-	-	-	-
Unigene33239_Taxus	0	35	0.01	10.43	10.0265	8.79144e-11	9.60856e-10	-	-	-	-
Unigene11375_Taxus	0	34	0.01	10.13	9.98442	1.70512e-10	1.80063e-09	-	-	-	gi|15220579|ref|NP_176957.1|/5e-59/phototropic-responsive NPH3 family protein [Arabidopsis thaliana] >gi|42572025|ref|NP_974103.1| phototropic-responsive NPH3 family protein [Arabidopsis thaliana] >gi|31711740|gb|AAP68226.1| At1g67900 [Arabidopsis thaliana]
Unigene13094_Taxus	0	34	0.01	10.13	9.98442	1.70512e-10	1.79956e-09	-	-	-	gi|115457370|ref|NP_001052285.1|/3e-40/Os04g0227200 [Oryza sativa (japonica cultivar-group)] >gi|38346024|emb|CAE01955.2| OSJNBb0071D01.1 [Oryza sativa (japonica cultivar-group)] >gi|38346892|emb|CAE03917.2| OSJNBb0015G09.11 [Oryza sativa (japonica cultivar-group)]
Unigene19954_Taxus	0	33	0.01	9.83	9.94105	3.3071e-10	3.39573e-09	-	-	-	gi|224092400|ref|XP_002309592.1|/2e-28/2-oxoglutarate-dependent dioxygenase [Populus trichocarpa] >gi|222855568|gb|EEE93115.1| 2-oxoglutarate-dependent dioxygenase [Populus trichocarpa]
Unigene23608_Taxus	0	33	0.01	9.83	9.94105	3.3071e-10	3.39378e-09	-	-	-	-
Unigene36117_Taxus	0	33	0.01	9.83	9.94105	3.3071e-10	3.39182e-09	-	-	-	gi|2342564|emb|CAA74960.1|/1e-80/sedoheptulose-1,7-biphosphatase [Chlamydomonas reinhardtii]
Unigene30560_Taxus	0	32	0.01	9.53	9.89633	6.41418e-10	6.41238e-09	-	-	-	gi|188570391|gb|ACD64231.1|/2e-07/proton-dependent oligopeptide transport-like protein [Helianthus annuus]
Unigene35217_Taxus	0	32	0.01	9.53	9.89633	6.41418e-10	6.40878e-09	-	-	-	gi|194477324|ref|YP_002049503.1|/2e-08/possible ferredoxin (2Fe-2S) [Paulinella chromatophora] >gi|171192331|gb|ACB43293.1| possible ferredoxin (2Fe-2S) [Paulinella chromatophora]
Unigene29021_Taxus	0	32	0.01	9.53	9.89633	6.41418e-10	6.40519e-09	-	-	-	-
Unigene17730_Taxus	0	32	0.01	9.53	9.89633	6.41418e-10	6.4016e-09	-	-	-	-
Unigene3277_Taxus	0	32	0.01	9.53	9.89633	6.41418e-10	6.39802e-09	-	-	-	gi|195611394|gb|ACG27527.1|/3e-16/NADH dehydrogenase I subunit N [Zea mays] >gi|195634885|gb|ACG36911.1| NADH dehydrogenase I subunit N [Zea mays]
Unigene26808_Taxus	0	32	0.01	9.53	9.89633	6.41418e-10	6.39444e-09	-	-	-	-
Unigene36441_Taxus	0	31	0.01	9.24	9.85175	1.24404e-09	1.19411e-08	-	GO:0005215//transporter activity	GO:0006857//oligopeptide transport	gi|110736812|dbj|BAF00365.1|/1e-115/oligopeptide transporter - like protein [Arabidopsis thaliana]
Unigene16864_Taxus	0	31	0.01	9.24	9.85175	1.24404e-09	1.19346e-08	-	-	-	gi|116054885|emb|CAL56962.1|/5e-13/Predicted DNA damage inducible protein (ISS) [Ostreococcus tauri]
Unigene7859_Taxus	0	30	0.01	8.94	9.80413	2.41284e-09	2.23996e-08	-	-	-	gi|15241300|ref|NP_197525.1|/8e-09/DIN10 (DARK INDUCIBLE 10); hydrolase, hydrolyzing O-glycosyl compounds [Arabidopsis thaliana] >gi|79328212|ref|NP_001031910.1| DIN10 (DARK INDUCIBLE 10); hydrolase, hydrolyzing O-glycosyl compounds [Arabidopsis thaliana] >gi|79598832|ref|NP_851044.2| DIN10 (DARK INDUCIBLE 10); hydrolase, hydrolyzing O-glycosyl compounds [Arabidopsis thaliana] >gi|269969643|sp|Q8…
Unigene9080_Taxus	0	29	0.01	8.64	9.75489	4.67974e-09	4.19575e-08	-	-	-	gi|159486931|ref|XP_001701490.1|/1e-87/carbohydrate transporter [Chlamydomonas reinhardtii] >gi|158271672|gb|EDO97487.1| carbohydrate transporter [Chlamydomonas reinhardtii]
Unigene19008_Taxus	0	29	0.01	8.64	9.75489	4.67974e-09	4.19364e-08	-	-	-	-
Unigene35680_Taxus	0	29	0.01	8.64	9.75489	4.67974e-09	4.19153e-08	-	-	-	gi|50403823|gb|AAT76665.1|/1e-14/5-alpha-reductase [Pisum sativum]
Unigene14053_Taxus	0	28	0.01	8.34	9.7039	9.07644e-09	7.85699e-08	-	-	-	-
Unigene15813_Taxus	0	28	0.01	8.34	9.7039	9.07644e-09	7.85317e-08	-	-	-	gi|186478618|ref|NP_001077559.2|/1e-16/NDF6 (NDH DEPENDENT FLOW 6) [Arabidopsis thaliana]
Unigene33863_Taxus	0	28	0.01	8.34	9.7039	9.07644e-09	7.84936e-08	-	-	-	-
Unigene19778_Taxus	0	27	0.01	8.04	9.65105	1.76039e-08	1.46961e-07	-	-	-	-
Unigene28449_Taxus	0	27	0.01	8.04	9.65105	1.76039e-08	1.46892e-07	-	-	-	gi|115444841|ref|NP_001046200.1|/2e-31/Os02g0197600 [Oryza sativa (japonica cultivar-group)]
Unigene2777_Taxus	0	26	0.01	7.75	9.59805	3.41432e-08	2.75981e-07	-	-	-	-
Unigene22308_Taxus	0	25	0.01	7.45	9.5411	6.62212e-08	5.14717e-07	-	-	-	-
Unigene1445_Taxus	0	25	0.01	7.45	9.5411	6.62212e-08	5.14492e-07	-	-	-	gi|87162595|gb|ABD28390.1|/4e-06/Embryo-specific 3 [Medicago truncatula]
Unigene36129_Taxus	0	25	0.01	7.45	9.5411	6.62212e-08	5.14268e-07	-	-	-	gi|58430585|dbj|BAD89084.1|/3e-63/PpCOL1 [Physcomitrella patens] >gi|66841016|emb|CAI64583.1| CONSTANS-like 1 [Physcomitrella patens]
Unigene1897_Taxus	0	24	0.01	7.15	9.4818	1.28437e-07	9.58168e-07	GO:0016023//cytoplasmic membrane-bounded vesicle;GO:0016021//integral to membrane	-	-	gi|224112947|ref|XP_002316342.1|/4e-15/stress-induced hydrophobic peptide [Populus trichocarpa] >gi|222865382|gb|EEF02513.1| stress-induced hydrophobic peptide [Populus trichocarpa]
Unigene14471_Taxus	0	24	0.01	7.15	9.4818	1.28437e-07	9.57767e-07	-	GO:0046872//metal ion binding	-	gi|224096760|ref|XP_002334672.1|/3e-16/cytochrome P450 [Populus trichocarpa] >gi|222874188|gb|EEF11319.1| cytochrome P450 [Populus trichocarpa]
Unigene12667_Taxus	0	24	0.01	7.15	9.4818	1.28437e-07	9.57366e-07	-	-	-	gi|258678888|dbj|BAI39990.1|/8e-06/metallothionein [Tamarix androssowii]
Unigene10512_Taxus	0	24	0.01	7.15	9.4818	1.28437e-07	9.56966e-07	-	-	-	-
Unigene15578_Taxus	0	24	0.01	7.15	9.4818	1.28437e-07	9.56566e-07	-	-	-	gi|3152598|gb|AAC17079.1|/8e-06/Contains similarity to C2-HC type zinc finger protein C.e-MyT1 gb|U67079 from C. elegans and to hypersensitivity-related gene 201 isolog T28M21.14 from A. thaliana BAC gb|AF002109 [Arabidopsis thaliana]
Unigene36471_Taxus	0	23	0.01	6.85	9.41996	2.49106e-07	1.76595e-06	GO:0016020//membrane	GO:0016887//ATPase activity;GO:0005524//ATP binding	-	gi|224106201|ref|XP_002314083.1|/0.0/white-brown-complex ABC transporter family [Populus trichocarpa] >gi|222850491|gb|EEE88038.1| white-brown-complex ABC transporter family [Populus trichocarpa]
Unigene7479_Taxus	0	23	0.01	6.85	9.41996	2.49106e-07	1.76524e-06	-	-	-	-
Unigene20132_Taxus	0	23	0.01	6.85	9.41996	2.49106e-07	1.76454e-06	GO:0044425//membrane part;GO:0009536//plastid	-	GO:0015979//photosynthesis	gi|6006279|dbj|BAA84769.1|/4e-69/photosystem II 22 kDa protein [Arabidopsis thaliana]
Unigene791_Taxus	0	22	0.01	6.55	9.35535	4.83146e-07	3.30032e-06	-	-	-	gi|23197688|gb|AAN15371.1|/6e-12/serine/threonine kinase - like protein [Arabidopsis thaliana]
Unigene21248_Taxus	0	22	0.01	6.55	9.35535	4.83146e-07	3.29906e-06	-	-	-	gi|75756057|gb|ABA27080.1|/1e-06/TO118-23rc [Taraxacum officinale]
Unigene946_Taxus	0	22	0.01	6.55	9.35535	4.83146e-07	3.2978e-06	-	-	-	gi|115440191|ref|NP_001044375.1|/2e-22/Os01g0770100 [Oryza sativa (japonica cultivar-group)] >gi|113533906|dbj|BAF06289.1| Os01g0770100 [Oryza sativa Japonica Group]
Unigene12103_Taxus	0	22	0.01	6.55	9.35535	4.83146e-07	3.29653e-06	-	GO:0020037//heme binding;GO:0004497//monooxygenase activity;GO:0009055//electron carrier activity	GO:0055114//oxidation reduction	gi|15231516|ref|NP_189246.1|/9e-26/CYP71B16; electron carrier/ heme binding / iron ion binding / monooxygenase/ oxygen binding [Arabidopsis thaliana] >gi|13878389|sp|Q9LTM7.1|C71BG_ARATH RecName: Full=Cytochrome P450 71B16 >gi|11994433|dbj|BAB02435.1| cytochrome P450 [Arabidopsis thaliana]
Unigene36160_Taxus	0	22	0.01	6.55	9.35535	4.83146e-07	3.29527e-06	-	-	-	gi|115441537|ref|NP_001045048.1|/4e-72/Os01g0889900 [Oryza sativa (japonica cultivar-group)] >gi|113534579|dbj|BAF06962.1| Os01g0889900 [Oryza sativa Japonica Group]
Unigene7768_Taxus	0	22	0.01	6.55	9.35535	4.83146e-07	3.29401e-06	-	-	-	-
Unigene12831_Taxus	0	21	0.01	6.26	9.29002	9.37068e-07	6.09933e-06	-	-	-	gi|224589590|gb|ACN59328.1|/0.0/leucine-rich repeat receptor-like protein kinase [Arabidopsis thaliana]
Unigene16518_Taxus	0	21	0.01	6.26	9.29002	9.37068e-07	6.0971e-06	-	-	-	gi|93359564|gb|ABF13308.1|/8e-35/PP2c [Phaseolus vulgaris]
Unigene30903_Taxus	0	21	0.01	6.26	9.29002	9.37068e-07	6.09488e-06	-	-	-	-
Unigene3997_Taxus	0	21	0.01	6.26	9.29002	9.37068e-07	6.09265e-06	-	-	-	gi|4731376|gb|AAC05116.2|/1e-06/isoflavone reductase homolog Bet v 6.0101 [Betula pendula]
Unigene31168_Taxus	0	21	0.01	6.26	9.29002	9.37068e-07	6.09043e-06	-	-	-	-
Unigene7169_Taxus	0	21	0.01	6.26	9.29002	9.37068e-07	6.08821e-06	-	-	-	gi|15233393|ref|NP_192888.1|/4e-63/protein kinase family protein [Arabidopsis thaliana] >gi|75334855|sp|Q9LDN1.1|CRK33_ARATH RecName: Full=Putative cysteine-rich receptor-like protein kinase 33; Short=Cysteine-rich RLK33; Flags: Precursor >gi|7267849|emb|CAB78192.1| serine/threonine kinase-like protein [Arabidopsis thaliana] >gi|7321046|emb|CAB82154.1| serine/threonine kinase-like protein [Arabid…
Unigene28527_Taxus	0	21	0.01	6.26	9.29002	9.37068e-07	6.08599e-06	-	-	-	gi|8778808|gb|AAF79815.1|AC007396_8/2e-15/T4O12.13 [Arabidopsis thaliana]
Unigene631_Taxus	0	21	0.01	6.26	9.29002	9.37068e-07	6.08377e-06	-	-	-	-
Unigene16380_Taxus	0	21	0.01	6.26	9.29002	9.37068e-07	6.08155e-06	-	-	-	gi|89953439|gb|ABD83313.1|/2e-14/Fgenesh protein 60 [Beta vulgaris]
Unigene31388_Taxus	0	20	0.01	5.96	9.21917	1.81746e-06	1.11726e-05	-	-	-	-
Unigene8888_Taxus	0	20	0.01	5.96	9.21917	1.81746e-06	1.11687e-05	-	-	-	gi|226494167|ref|NP_001147346.1|/2e-17/LOC100280954 [Zea mays] >gi|105990544|gb|ABF81694.1| GASA-like protein [Zea mays] >gi|195610350|gb|ACG27005.1| gibberellin-regulated protein 1 precursor [Zea mays]
Unigene34398_Taxus	0	20	0.01	5.96	9.21917	1.81746e-06	1.11648e-05	-	-	-	gi|224152240|ref|XP_002337211.1|/7e-30/cytochrome P450 [Populus trichocarpa] >gi|222838470|gb|EEE76835.1| cytochrome P450 [Populus trichocarpa]
Unigene18174_Taxus	0	20	0.01	5.96	9.21917	1.81746e-06	1.1161e-05	-	-	-	gi|18424977|ref|NP_569016.1|/5e-06/hydroxyproline-rich glycoprotein family protein [Arabidopsis thaliana] >gi|75180377|sp|Q9LSK9.1|Y5566_ARATH RecName: Full=Uncharacterized protein At5g65660 >gi|30102568|gb|AAP21202.1| At5g65660 [Arabidopsis thaliana]
Unigene13286_Taxus	0	19	0.01	5.66	9.14466	3.525e-06	2.05088e-05	-	-	-	gi|13487785|gb|AAK27719.1|AF356003_1/1e-135/ADP-glucose pyrophosphorylase large subunit CagpL2 [Cicer arietinum]
Unigene11040_Taxus	0	19	0.01	5.66	9.14466	3.525e-06	2.05021e-05	-	GO:0005515//protein binding	-	gi|255670897|dbj|BAH91689.1|/7e-32/Os02g0472700 [Oryza sativa Japonica Group]
Unigene18698_Taxus	0	19	0.01	5.66	9.14466	3.525e-06	2.04954e-05	-	-	-	-
Unigene4355_Taxus	0	19	0.01	5.66	9.14466	3.525e-06	2.04887e-05	GO:0016023//cytoplasmic membrane-bounded vesicle	GO:0016798//hydrolase activity, acting on glycosyl bonds;GO:0005488//binding	GO:0008152//metabolic process	gi|157313306|gb|ABV32546.1|/6e-16/beta-galactosidase protein 1 [Prunus persica]
Unigene27635_Taxus	0	19	0.01	5.66	9.14466	3.525e-06	2.0482e-05	-	-	-	-
Unigene29422_Taxus	0	19	0.01	5.66	9.14466	3.525e-06	2.04753e-05	-	-	-	-
Unigene29331_Taxus	0	19	0.01	5.66	9.14466	3.525e-06	2.04687e-05	-	-	-	-
Unigene1588_Taxus	0	19	0.01	5.66	9.14466	3.525e-06	2.0462e-05	-	-	-	-
Unigene14475_Taxus	0	19	0.01	5.66	9.14466	3.525e-06	2.04553e-05	GO:0005618//cell wall;GO:0009570//chloroplast stroma;GO:0005634//nucleus;GO:0048046//apoplast;GO:0009535//chloroplast thylakoid membrane	GO:0005515//protein binding;GO:0005524//ATP binding;GO:0003700//sequence-specific DNA binding transcription factor activity	GO:0042742//defense response to bacterium	gi|32481061|gb|AAP83927.1|/4e-10/Rubisco activase alpha form precursor [Deschampsia antarctica]
Unigene23266_Taxus	0	18	0.01	5.36	9.06609	6.83678e-06	3.79904e-05	-	-	-	-
Unigene27252_Taxus	0	18	0.01	5.36	9.06609	6.83678e-06	3.79786e-05	-	-	-	-
Unigene3243_Taxus	0	18	0.01	5.36	9.06609	6.83678e-06	3.79667e-05	-	-	-	gi|41223415|gb|AAR99710.1|/1e-12/NBS-LRR-like protein D [Oryza sativa Indica Group]
Unigene31569_Taxus	0	18	0.01	5.36	9.06609	6.83678e-06	3.79549e-05	-	-	-	gi|115446429|ref|NP_001046994.1|/1e-06/Os02g0525600 [Oryza sativa (japonica cultivar-group)] >gi|113536525|dbj|BAF08908.1| Os02g0525600 [Oryza sativa Japonica Group]
Unigene14263_Taxus	0	18	0.01	5.36	9.06609	6.83678e-06	3.79431e-05	-	-	-	gi|48431269|gb|AAT44124.1|/3e-61/F3H-like protein [Saussurea medusa]
Unigene7598_Taxus	0	18	0.01	5.36	9.06609	6.83678e-06	3.79312e-05	-	-	-	-
Unigene22560_Taxus	0	18	0.01	5.36	9.06609	6.83678e-06	3.79194e-05	-	-	-	-
Unigene16119_Taxus	0	17	0.01	5.06	8.98299	1.32601e-05	7.01181e-05	-	-	-	gi|21553833|gb|AAM62926.1|/6e-44/cinnamoyl CoA reductase-like protein [Arabidopsis thaliana]
Unigene23211_Taxus	0	17	0.01	5.06	8.98299	1.32601e-05	7.00973e-05	-	-	-	gi|115438152|ref|NP_001043470.1|/9e-08/Os01g0595600 [Oryza sativa (japonica cultivar-group)] >gi|20521314|dbj|BAB91828.1| hydrolase-like [Oryza sativa Japonica Group] >gi|20804634|dbj|BAB92324.1| hydrolase-like [Oryza sativa Japonica Group] >gi|113533001|dbj|BAF05384.1| Os01g0595600 [Oryza sativa Japonica Group]
Unigene15636_Taxus	0	17	0.01	5.06	8.98299	1.32601e-05	7.00765e-05	-	-	-	gi|57863814|gb|AAW56867.1|/1e-48/unkown protein [Oryza sativa Japonica Group] >gi|255676450|dbj|BAH93196.1| Os05g0481100 [Oryza sativa Japonica Group]
Unigene8294_Taxus	0	17	0.01	5.06	8.98299	1.32601e-05	7.00557e-05	-	-	-	-
Unigene33608_Taxus	0	16	0.01	4.77	8.89785	2.57182e-05	0.000128303	-	-	-	gi|39636489|gb|AAR29057.1|/1e-107/glutamine synthetase 1 [Datisca glomerata]
Unigene31192_Taxus	0	16	0.01	4.77	8.89785	2.57182e-05	0.000128267	-	-	-	gi|226495911|ref|NP_001147026.1|/6e-07/glyoxalase/bleomycin resistance protein/dioxygenase [Zea mays] >gi|195606588|gb|ACG25124.1| glyoxalase/bleomycin resistance protein/dioxygenase [Zea mays]
Unigene23924_Taxus	0	16	0.01	4.77	8.89785	2.57182e-05	0.000128231	-	-	-	-
Unigene16464_Taxus	0	16	0.01	4.77	8.89785	2.57182e-05	0.000128195	-	-	-	gi|144583781|gb|ABP01579.1|/7e-18/transcription factor CYC2 [Bournea leiophylla]
Unigene4364_Taxus	0	16	0.01	4.77	8.89785	2.57182e-05	0.000128159	GO:0009536//plastid	-	-	gi|124300960|gb|ABN04732.1|/1e-08/At5g62140 [Arabidopsis thaliana]
Unigene18064_Taxus	0	15	0.01	4.47	8.80413	4.98808e-05	0.000234034	-	-	-	-
Unigene8472_Taxus	0	15	0.01	4.47	8.80413	4.98808e-05	0.000233972	-	-	-	-
Unigene21766_Taxus	0	15	0.01	4.47	8.80413	4.98808e-05	0.000233911	GO:0009507//chloroplast	GO:0051287//NAD or NADH binding;GO:0004365//glyceraldehyde-3-phosphate dehydrogenase (phosphorylating) activity;GO:0047100//glyceraldehyde-3-phosphate dehydrogenase (NADP+) (phosphorylating) activity	GO:0019253//reductive pentose-phosphate cycle;GO:0055114//oxidation reduction;GO:0006096//glycolysis	gi|20455487|sp|P19866.2|G3PA_SPIOL/3e-18/RecName: Full=Glyceraldehyde-3-phosphate dehydrogenase A, chloroplastic; AltName: Full=NADP-dependent glyceraldehydephosphate dehydrogenase subunit A; Flags: Precursor >gi|2529370|gb|AAD10217.1| NADP-dependent glyceraldehydephosphate dehydrogenase subunit A [Spinacia oleracea]
Unigene6265_Taxus	0	15	0.01	4.47	8.80413	4.98808e-05	0.000233849	-	-	-	-
Unigene6791_Taxus	0	15	0.01	4.47	8.80413	4.98808e-05	0.000233788	-	-	-	gi|115468786|ref|NP_001057992.1|/2e-08/Os06g0597900 [Oryza sativa (japonica cultivar-group)] >gi|50725456|dbj|BAD32927.1| SOUL heme-binding protein-like [Oryza sativa Japonica Group] >gi|50725582|dbj|BAD33050.1| SOUL heme-binding protein-like [Oryza sativa Japonica Group] >gi|113596032|dbj|BAF19906.1| Os06g0597900 [Oryza sativa Japonica Group]
Unigene15182_Taxus	0	15	0.01	4.47	8.80413	4.98808e-05	0.000233726	-	-	-	-
Unigene17152_Taxus	0	15	0.01	4.47	8.80413	4.98808e-05	0.000233665	-	-	-	gi|18404409|ref|NP_565860.1|/3e-07/chloroplast lumen common family protein [Arabidopsis thaliana] >gi|4056493|gb|AAC98059.1| chloroplast lumen common protein family [Arabidopsis thaliana] >gi|114050659|gb|ABI49479.1| At2g37400 [Arabidopsis thaliana]
Unigene8113_Taxus	0	15	0.01	4.47	8.80413	4.98808e-05	0.000233603	-	-	-	-
Unigene16176_Taxus	0	15	0.01	4.47	8.80413	4.98808e-05	0.000233542	-	-	-	gi|116793055|gb|ABK26600.1|/6e-06/unknown [Picea sitchensis]
Unigene33423_Taxus	0	15	0.01	4.47	8.80413	4.98808e-05	0.00023348	GO:0009536//plastid	GO:0003676//nucleic acid binding	-	gi|2443390|dbj|BAA22411.1|/5e-40/Ps16 protein [Triticum aestivum]
Unigene2596_Taxus	0	14	0.01	4.17	8.7039	9.67444e-05	0.000424403	-	-	-	gi|50253464|gb|AAT71934.1|/1e-07/At2g47485 [Arabidopsis thaliana] >gi|51972104|gb|AAU15156.1| At2g47485 [Arabidopsis thaliana]
Unigene2730_Taxus	0	14	0.01	4.17	8.7039	9.67444e-05	0.000424299	-	-	-	-
Unigene19084_Taxus	0	14	0.01	4.17	8.7039	9.67444e-05	0.000424194	-	-	-	gi|219115113|ref|XP_002178352.1|/5e-24/uroporphyrinogen-iii synthase [Phaeodactylum tricornutum CCAP 1055/1] >gi|217410087|gb|EEC50017.1| uroporphyrinogen-iii synthase [Phaeodactylum tricornutum CCAP 1055/1]
Unigene2261_Taxus	0	14	0.01	4.17	8.7039	9.67444e-05	0.00042409	-	-	-	-
Unigene8322_Taxus	0	14	0.01	4.17	8.7039	9.67444e-05	0.000423986	-	-	-	gi|110931818|gb|ABH02908.1|/3e-56/MYB transcription factor MYB60 [Glycine max]
Unigene4279_Taxus	0	14	0.01	4.17	8.7039	9.67444e-05	0.000423881	-	-	-	-
Unigene28659_Taxus	0	14	0.01	4.17	8.7039	9.67444e-05	0.000423777	-	-	-	gi|22326868|ref|NP_197269.2|/9e-16/hydrolase, acting on ester bonds [Arabidopsis thaliana] >gi|17065370|gb|AAL32839.1| Unknown protein [Arabidopsis thaliana]
Unigene1643_Taxus	0	14	0.01	4.17	8.7039	9.67444e-05	0.000423673	-	-	-	-
Unigene13271_Taxus	0	14	0.01	4.17	8.7039	9.67444e-05	0.000423569	-	-	-	gi|3777483|dbj|BAA33932.1|/7e-46/sulfate transporter [Arabidopsis thaliana]
Unigene5248_Taxus	3	1306	0.95	389.09	8.67796	6.69002e-05	0.000306304	-	-	-	gi|162319704|gb|ABX84378.1|/1e-10/amylase inhibitor-like protein [Triticum aestivum]
Unigene12781_Taxus	0	13	0.01	3.87	8.59619	0.000187638	0.000770933	-	-	-	-
Unigene9806_Taxus	0	13	0.01	3.87	8.59619	0.000187638	0.000770755	-	-	-	gi|33145986|emb|CAC95130.2|/3e-75/beta-carotene hydroxylase [Crocus sativus]
Unigene25962_Taxus	0	13	0.01	3.87	8.59619	0.000187638	0.000770577	-	-	-	-
Unigene19376_Taxus	0	13	0.01	3.87	8.59619	0.000187638	0.0007704	-	-	-	gi|51536066|dbj|BAD38192.1|/8e-06/mitochondrial transcription termination factor-like [Oryza sativa Japonica Group] >gi|255676842|dbj|BAH93396.1| Os06g0224600 [Oryza sativa Japonica Group]
Unigene14217_Taxus	0	13	0.01	3.87	8.59619	0.000187638	0.000770222	-	-	-	gi|116782623|gb|ABK22579.1|/7e-11/unknown [Picea sitchensis]
Unigene8509_Taxus	0	13	0.01	3.87	8.59619	0.000187638	0.000770045	-	-	-	-
Unigene31740_Taxus	0	13	0.01	3.87	8.59619	0.000187638	0.000769867	-	-	-	-
Unigene26950_Taxus	0	13	0.01	3.87	8.59619	0.000187638	0.00076969	-	-	-	gi|37625029|gb|AAQ96338.1|/1e-06/lipid transfer protein [Vitis aestivalis]
Unigene14756_Taxus	0	13	0.01	3.87	8.59619	0.000187638	0.000769513	-	-	-	-
Unigene4878_Taxus	0	13	0.01	3.87	8.59619	0.000187638	0.000769336	-	-	-	gi|164605522|dbj|BAF98588.1|/3e-19/CM0216.540.nc [Lotus japonicus]
Unigene25284_Taxus	0	13	0.01	3.87	8.59619	0.000187638	0.000769159	-	-	-	-
Unigene9720_Taxus	0	13	0.01	3.87	8.59619	0.000187638	0.000768982	-	-	-	gi|18400628|ref|NP_565577.1|/5e-06/AtGDU4 (Arabidopsis thaliana GLUTAMINE DUMPER 4) >gi|20198236|gb|AAM15477.1| Expressed protein [Arabidopsis thaliana] >gi|88900418|gb|ABD57521.1| At2g24762 [Arabidopsis thaliana]
Unigene5782_Taxus	0	13	0.01	3.87	8.59619	0.000187638	0.000768805	-	-	-	-
Unigene14289_Taxus	0	13	0.01	3.87	8.59619	0.000187638	0.000768628	-	-	-	-
Unigene29802_Taxus	0	13	0.01	3.87	8.59619	0.000187638	0.000768451	GO:0009536//plastid	-	GO:0006350//transcription	gi|38260696|gb|AAR15507.1|/3e-18/scarecrow-like 23 [Zea mays]
Unigene31019_Taxus	0	13	0.01	3.87	8.59619	0.000187638	0.000768275	-	-	-	gi|115456709|ref|NP_001051955.1|/3e-49/Os03g0857400 [Oryza sativa (japonica cultivar-group)] >gi|108712199|gb|ABF99994.1| expressed protein [Oryza sativa (japonica cultivar-group)] >gi|113550426|dbj|BAF13869.1| Os03g0857400 [Oryza sativa Japonica Group]
Unigene15243_Taxus	0	13	0.01	3.87	8.59619	0.000187638	0.000768098	-	-	-	-
Unigene19537_Taxus	6	2351	1.9	700.43	8.5261	1.33745e-05	7.04725e-05	-	-	-	-
Unigene25_Taxus	3	1033	0.95	307.76	8.33966	6.69002e-05	0.000306146	-	-	-	gi|2267595|gb|AAB63590.1|/1e-34/plastocyanin precursor [Oryza sativa Indica Group]
Unigene34230_Taxus	9	1818	2.85	541.63	7.5702	2.1984e-06	1.31823e-05	-	-	-	-
Unigene19243_Taxus	12	2322	3.81	691.79	7.5044	3.2937e-07	2.29477e-06	-	-	-	gi|2326677|emb|CAA86613.1|/2e-37/late embryogenesis (Lea)-like protein [Solanum lycopersicum]
Unigene27491_Taxus	5	897	1.59	267.24	7.39297	2.35812e-05	0.000118739	-	-	-	gi|226531442|ref|NP_001148258.1|/8e-06/phosphoribulokinase [Zea mays] >gi|195617000|gb|ACG30330.1| phosphoribulokinase [Zea mays]
Unigene1525_Taxus	19	2527	6.03	752.86	6.96408	3.31036e-09	3.02431e-08	-	-	-	gi|40362748|gb|AAR84643.1|/8e-06/defensin [Picea glauca]
Unigene33582_Taxus	9	1175	2.85	350.06	6.9405	2.1984e-06	1.32179e-05	-	-	-	gi|115433990|ref|NP_001041753.1|/5e-17/Os01g0102900 [Oryza sativa (japonica cultivar-group)] >gi|417260|sp|Q03200|LIRP1_ORYSJ Light-regulated protein precursor >gi|20804448|dbj|BAB92145.1| light-regulated protein [Oryza sativa Japonica Group] >gi|113531284|dbj|BAF03667.1| Os01g0102900 [Oryza sativa Japonica Group]
Unigene34221_Taxus	2	236	0.63	70.31	6.80223	0.00010873	0.000470836	-	-	-	gi|88011082|gb|ABD38900.1|/4e-21/At5g20935 [Arabidopsis thaliana]
Unigene27377_Taxus	2	210	0.63	62.56	6.63374	0.00010873	0.000472328	-	-	-	gi|226528359|ref|NP_001151155.1|/8e-06/thioredoxin-like 5 [Zea mays] >gi|195644684|gb|ACG41810.1| thioredoxin-like 5 [Zea mays]
Unigene24704_Taxus	4	339	1.27	101	6.31338	4.04544e-05	0.000192802	-	-	-	-
Unigene13464_Taxus	5	424	1.59	126.32	6.31191	2.35812e-05	0.000118773	-	-	-	gi|148905856|gb|ABR16090.1|/6e-19/unknown [Picea sitchensis]
Unigene3850_Taxus	5	422	1.59	125.73	6.30516	2.35812e-05	0.000118806	-	-	-	gi|115467452|ref|NP_001057325.1|/3e-20/Os06g0260000 [Oryza sativa (japonica cultivar-group)]
Unigene31293_Taxus	14	1096	4.44	326.53	6.20051	9.01042e-08	6.88634e-07	-	-	-	gi|131176|sp|P13194.2|PSAE_HORVU/4e-23/RecName: Full=Photosystem I reaction center subunit IV, chloroplastic; Short=PSI-E; AltName: Full=Photosystem I 10.8 kDa polypeptide; Flags: Precursor >gi|226163|prf||1413233A 10.8kD photosystem I protein
Unigene19883_Taxus	4	302	1.27	89.97	6.14654	4.04544e-05	0.000193009	-	-	-	gi|226497874|ref|NP_001151520.1|/2e-06/3-beta hydroxysteroid dehydrogenase/isomerase [Zea mays] >gi|195647386|gb|ACG43161.1| 3-beta hydroxysteroid dehydrogenase/isomerase [Zea mays]
Unigene33721_Taxus	35	2542	11.1	757.33	6.09229	1.70752e-13	2.52864e-12	-	-	-	gi|116783648|gb|ABK23037.1|/8e-07/unknown [Picea sitchensis] >gi|148907655|gb|ABR16956.1| unknown [Picea sitchensis]
Unigene3765_Taxus	5	342	1.59	101.89	6.00184	2.35812e-05	0.000118907	-	-	-	-
Unigene21800_Taxus	16	1088	5.07	324.14	5.99849	2.42416e-08	1.98558e-07	-	-	-	-
Unigene23603_Taxus	12	789	3.81	235.06	5.94709	3.2937e-07	2.29837e-06	-	-	-	-
Unigene11761_Taxus	5	327	1.59	97.42	5.93712	2.35812e-05	0.000118874	-	GO:0016705//oxidoreductase activity, acting on paired donors, with incorporation or reduction of molecular oxygen	GO:0016117//carotenoid biosynthetic process	gi|115437908|ref|NP_001043410.1|/7e-15/Os01g0581300 [Oryza sativa (japonica cultivar-group)] >gi|113532941|dbj|BAF05324.1| Os01g0581300 [Oryza sativa Japonica Group]
Unigene27319_Taxus	365	23675	115.74	7053.42	5.92936	4.19886e-13	5.89927e-12	-	-	-	gi|26418686|gb|AAN78125.1|/5e-06/dehydrin [Citrus x paradisi]
Unigene23148_Taxus	21	1249	6.66	372.11	5.80406	8.6986e-10	8.54275e-09	-	-	-	-
Unigene17924_Taxus	2	112	0.63	33.37	5.72706	0.00010873	0.000472674	-	-	-	gi|115489236|ref|NP_001067105.1|/2e-13/Os12g0575000 [Oryza sativa (japonica cultivar-group)] >gi|77556201|gb|ABA98997.1| expressed protein [Oryza sativa (japonica cultivar-group)] >gi|113649612|dbj|BAF30124.1| Os12g0575000 [Oryza sativa Japonica Group]
Unigene27830_Taxus	4	225	1.27	67.03	5.72191	4.04544e-05	0.000192957	-	-	-	gi|225431926|ref|XP_002277169.1|/4e-26/PREDICTED: class I beta-1,3-glucanase [Vitis vinifera] >gi|22550395|gb|AAF44667.2|AF239617_1 beta-1,3-glucanase [Vitis vinifera]
Unigene34612_Taxus	13	700	4.12	208.55	5.66161	1.7269e-07	1.265e-06	-	-	-	gi|255676080|dbj|BAH92972.1|/9e-18/Os05g0179900 [Oryza sativa Japonica Group]
Unigene23584_Taxus	35	1879	11.1	559.8	5.65628	1.70752e-13	2.53074e-12	-	-	-	-
Unigene2790_Taxus	2	104	0.63	30.98	5.61984	0.00010873	0.000470607	-	-	-	gi|226493275|ref|NP_001151013.1|/3e-06/metal ion binding protein [Zea mays] >gi|195643644|gb|ACG41290.1| metal ion binding protein [Zea mays]
Unigene32199_Taxus	5	260	1.59	77.46	5.60635	2.35812e-05	0.00011884	-	-	-	gi|115465982|ref|NP_001056590.1|/4e-32/Os06g0112000 [Oryza sativa (japonica cultivar-group)] >gi|7363286|dbj|BAA93030.1| pentatricopeptide (PPR) repeat-containing protein-like [Oryza sativa Japonica Group] >gi|113594630|dbj|BAF18504.1| Os06g0112000 [Oryza sativa Japonica Group]
Unigene13595_Taxus	17	873	5.39	260.09	5.59258	1.25136e-08	1.06921e-07	-	-	-	gi|239056183|emb|CAQ58618.1|/5e-11/calcium binding [Vitis vinifera]
Unigene35751_Taxus	2	100	0.63	29.79	5.56333	0.00010873	0.000472443	-	-	-	gi|8778217|gb|AAF79226.1|AC006917_11/9e-29/F10B6.30 [Arabidopsis thaliana]
Unigene105_Taxus	139	6517	44.08	1941.59	5.46097	6.75016e-14	1.07562e-12	-	-	-	gi|127384|sp|P20830.1|MT1_PEA/2e-06/RecName: Full=Metallothionein-like protein 1; Short=MT-1 >gi|312505|emb|CAA80645.1| metallothionein-like protein [Pisum sativum]
Unigene5817_Taxus	9	421	2.85	125.43	5.45978	2.1984e-06	1.32268e-05	-	-	-	gi|45199123|ref|NP_986152.1|/3e-11/AFR605Cp [Ashbya gossypii ATCC 10895] >gi|44985263|gb|AAS53976.1| AFR605Cp [Ashbya gossypii ATCC 10895]
Unigene34810_Taxus	7	326	2.22	97.12	5.45114	7.43304e-06	4.10349e-05	-	-	-	gi|255673227|dbj|BAH91068.1|/6e-06/Os01g0363550 [Oryza sativa Japonica Group]
Unigene20783_Taxus	2	89	0.63	26.52	5.39559	0.00010873	0.000472098	-	-	-	gi|15220595|ref|NP_172055.1|/6e-27/ankyrin repeat family protein [Arabidopsis thaliana] >gi|4836914|gb|AAD30616.1|AC007153_8 Hypothetical protein [Arabidopsis thaliana]
Unigene21887_Taxus	3	130	0.95	38.73	5.34938	6.69002e-05	0.000306856	-	-	-	-
Unigene15622_Taxus	528	22455	167.43	6689.95	5.32037	0	0	-	-	-	gi|1705810|sp|P52406.1|CHI4_SOLTU/2e-06/RecName: Full=Endochitinase 4; Flags: Precursor >gi|467826|gb|AAA17410.1| chitinase; poly[1, 4-beta-(2-acetamido-2-deoxy-D- glucoside)]glucanohydrolase [Solanum tuberosum]
Unigene33539_Taxus	3	127	0.95	37.84	5.31584	6.69002e-05	0.00030654	-	-	-	-
Unigene17380_Taxus	2	81	0.63	24.13	5.25933	0.00010873	0.000471983	-	-	-	gi|170104350|ref|XP_001883389.1|/1e-113/fructose-1,6-bisphosphatase [Laccaria bicolor S238N-H82] >gi|164641842|gb|EDR06101.1| fructose-1,6-bisphosphatase [Laccaria bicolor S238N-H82]
Unigene1499_Taxus	2	80	0.63	23.83	5.24128	0.00010873	0.000470721	-	-	-	gi|215415833|dbj|BAG85147.1|/7e-31/Nod factor receptor protein [Glycine soja]
Unigene29373_Taxus	2	77	0.63	22.94	5.18637	0.00010873	0.000472213	-	-	-	gi|164657065|ref|XP_001729659.1|/8e-06/hypothetical protein MGL_3203 [Malassezia globosa CBS 7966] >gi|159103552|gb|EDP42445.1| hypothetical protein MGL_3203 [Malassezia globosa CBS 7966]
Unigene33026_Taxus	6	227	1.9	67.63	5.15359	1.33745e-05	7.06187e-05	-	-	-	gi|38261495|gb|AAR15893.1|/2e-36/chitinase [Oryza sativa]
Unigene4851_Taxus	2	73	0.63	21.75	5.10952	0.00010873	0.000472559	-	-	-	gi|224090683|ref|XP_002309057.1|/8e-96/cytochrome P450 [Populus trichocarpa] >gi|222855033|gb|EEE92580.1| cytochrome P450 [Populus trichocarpa]
Unigene28832_Taxus	2	67	0.63	19.96	4.98562	0.00010873	0.000471179	-	-	-	-
Unigene33566_Taxus	8	269	2.54	80.14	4.97962	4.06722e-06	2.33809e-05	-	-	-	gi|2570515|gb|AAB82143.1|/1e-58/glycolate oxidase [Oryza sativa Indica Group]
Unigene1600_Taxus	4	133	1.27	39.62	4.96333	4.04544e-05	0.000192906	-	-	-	gi|2346970|dbj|BAA21919.1|/2e-15/ZPT2-10 [Petunia x hybrida] >gi|7959291|dbj|BAA96070.1| C2H2 zinc-finger protein ZPT2-10 [Petunia x hybrida]
Unigene16181_Taxus	2	64	0.63	19.07	4.91981	0.00010873	0.000471065	-	-	-	gi|30682417|ref|NP_850793.1|/2e-06/VQ motif-containing protein [Arabidopsis thaliana] >gi|91806832|gb|ABE66143.1| VQ motif-containing protein [Arabidopsis thaliana] >gi|109946555|gb|ABG48456.1| At5g08480 [Arabidopsis thaliana]
Unigene20822_Taxus	273	8507	86.57	2534.46	4.87167	0	0	-	-	-	gi|168812248|gb|ACA30299.1|/1e-12/putative low-temperature-induced protein [Cupressus sempervirens]
Unigene289_Taxus	3	90	0.95	26.81	4.8187	6.69002e-05	0.000306461	-	-	-	-
Unigene17348_Taxus	15	448	4.76	133.47	4.80941	4.68192e-08	3.7153e-07	-	-	-	gi|18416145|ref|NP_567681.1|/8e-56/short-chain dehydrogenase/reductase (SDR) family protein [Arabidopsis thaliana]
Unigene13109_Taxus	2	58	0.63	17.28	4.77761	0.00010873	0.000471638	-	-	-	gi|195629768|gb|ACG36525.1|/1e-107/fatty acid elongase [Zea mays]
Unigene31774_Taxus	2	56	0.63	16.68	4.72662	0.00010873	0.000471753	-	-	-	gi|2160182|gb|AAB60745.1|/2e-12/ESTs gb|ATTS1236,gb|T43334,gb|N97019,gb|AA395203 come from this gene [Arabidopsis thaliana]
Unigene34487_Taxus	4	109	1.27	32.47	4.67621	4.04544e-05	0.000192854	-	-	-	gi|168062613|ref|XP_001783273.1|/6e-19/predicted protein [Physcomitrella patens subsp. patens] >gi|162665191|gb|EDQ51883.1| predicted protein [Physcomitrella patens subsp. patens]
Unigene33087_Taxus	2	54	0.63	16.09	4.67467	0.00010873	0.000471294	-	-	-	-
Unigene23772_Taxus	5	135	1.59	40.22	4.66081	2.35812e-05	0.000118639	-	-	-	-
Unigene30821_Taxus	14	373	4.44	111.13	4.64554	9.01042e-08	6.88339e-07	-	-	-	-
Unigene24916_Taxus	7	185	2.22	55.12	4.63394	7.43304e-06	4.09334e-05	-	-	-	-
Unigene17147_Taxus	7	184	2.22	54.82	4.62607	7.43304e-06	4.10095e-05	-	-	-	gi|116784684|gb|ABK23437.1|/6e-06/unknown [Picea sitchensis]
Unigene30324_Taxus	39	1018	12.37	303.29	4.61578	7.74936e-14	1.21957e-12	-	-	-	gi|168001771|ref|XP_001753588.1|/3e-31/predicted protein [Physcomitrella patens subsp. patens] >gi|162695467|gb|EDQ81811.1| predicted protein [Physcomitrella patens subsp. patens]
Unigene30420_Taxus	56	1449	17.76	431.7	4.60333	0	0	-	-	-	gi|115443897|ref|NP_001045728.1|/6e-06/Os02g0122600 [Oryza sativa (japonica cultivar-group)] >gi|113535259|dbj|BAF07642.1| Os02g0122600 [Oryza sativa Japonica Group]
Unigene29518_Taxus	15	387	4.76	115.3	4.59829	4.68192e-08	3.71861e-07	-	-	-	-
Unigene114_Taxus	2	51	0.63	15.19	4.59163	0.00010873	0.000471523	-	-	-	gi|15225223|ref|NP_180789.1|/3e-17/UCC1 (UCLACYANIN 1); copper ion binding / electron carrier [Arabidopsis thaliana] >gi|3399767|gb|AAC32038.1| uclacyanin I [Arabidopsis thaliana]
Unigene27048_Taxus	7	178	2.22	53.03	4.57818	7.43304e-06	4.09587e-05	-	-	-	-
Unigene33716_Taxus	21	533	6.66	158.79	4.57545	8.6986e-10	8.55218e-09	-	-	-	gi|239616064|gb|ACR83706.1|/2e-12/MYB transcription factor R2R3-like protein [Populus tremuloides]
Unigene3322_Taxus	2	50	0.63	14.9	4.56382	0.00010873	0.000471868	-	-	-	gi|124359224|gb|ABN05735.1|/6e-20/Homeobox domain, ZF-HD class; ZF-HD homeobox protein Cys/His-rich dimerisation region; Homeodomain-like [Medicago truncatula] >gi|124360958|gb|ABN08930.1| Homeobox domain, ZF-HD class; ZF-HD homeobox protein Cys/His-rich dimerisation region; Homeodomain-like [Medicago truncatula]
Unigene8697_Taxus	4	100	1.27	29.79	4.55193	4.04544e-05	0.000192596	-	-	-	-
Unigene10514_Taxus	4	99	1.27	29.49	4.53733	4.04544e-05	0.000192545	-	-	-	gi|9802526|gb|AAF99728.1|AC004557_7/7e-07/F17L21.8 [Arabidopsis thaliana]
Unigene20334_Taxus	2	49	0.63	14.6	4.53447	0.00010873	0.000471409	-	-	-	-
Unigene31345_Taxus	31	752	9.83	224.04	4.51042	1.28808e-12	1.70738e-11	-	-	-	gi|9843639|emb|CAC03598.1|/4e-22/Rieske FeS protein [Arabidopsis thaliana]
Unigene32680_Taxus	29	703	9.2	209.44	4.50876	4.38006e-12	5.46817e-11	-	-	-	-
Unigene32933_Taxus	36	872	11.42	259.79	4.50771	1.21902e-13	1.83575e-12	-	-	-	gi|115458046|ref|NP_001052623.1|/2e-15/Os04g0386700 [Oryza sativa (japonica cultivar-group)] >gi|38347228|emb|CAE05023.2| OSJNBa0044M19.10 [Oryza sativa (japonica cultivar-group)]
Unigene29716_Taxus	9	216	2.85	64.35	4.49691	2.1984e-06	1.32134e-05	-	-	-	-
Unigene27684_Taxus	13	308	4.12	91.76	4.47715	1.7269e-07	1.2624e-06	-	-	-	gi|3334199|sp|O49852.1|GCSP_FLATR/5e-11/RecName: Full=Glycine dehydrogenase [decarboxylating], mitochondrial; AltName: Full=Glycine decarboxylase; AltName: Full=Glycine cleavage system P protein; Flags: Precursor >gi|2894360|emb|CAB16916.1| P-Protein precursor [Flaveria trinervia]
Unigene18762_Taxus	3	71	0.95	21.15	4.47659	6.69002e-05	0.000306777	-	-	-	gi|115469776|ref|NP_001058487.1|/3e-14/Os06g0701900 [Oryza sativa (japonica cultivar-group)]
Unigene33004_Taxus	21	491	6.66	146.28	4.45707	8.6986e-10	8.53335e-09	-	-	-	-
Unigene36087_Taxus	6	136	1.9	40.52	4.41456	1.33745e-05	7.04308e-05	-	-	-	gi|32400790|gb|AAP80627.1|AF475105_1/9e-38/apomixis-associated protein [Triticum aestivum]
Unigene26500_Taxus	2	45	0.63	13.41	4.41181	0.00010873	0.00047095	-	-	-	-
Unigene13926_Taxus	46	996	14.59	296.74	4.34615	4.24106e-14	6.96997e-13	GO:0009536//plastid;GO:0016020//membrane	-	-	gi|195636268|gb|ACG37602.1|/4e-13/cold acclimation protein COR413-PM1 [Zea mays]
Unigene10634_Taxus	182	3938	57.71	1173.24	4.34553	0	0	-	-	-	gi|219562761|gb|ACL27840.1|/2e-18/dehydrin 9 [Pinus contorta]
Unigene14176_Taxus	4	84	1.27	25.03	4.30076	4.04544e-05	0.000192648	-	-	-	-
Unigene10046_Taxus	6	125	1.9	37.24	4.29278	1.33745e-05	7.05978e-05	-	-	-	-
Unigene15522_Taxus	6	125	1.9	37.24	4.29278	1.33745e-05	7.04933e-05	-	-	-	-
Unigene35716_Taxus	3	62	0.95	18.47	4.28111	6.69002e-05	0.000306698	-	-	-	gi|6018089|gb|AAF01765.1|AF184278_1/2e-28/homeodomain-leucine zipper protein 57 [Glycine max]
Unigene12512_Taxus	3	62	0.95	18.47	4.28111	6.69002e-05	0.000306619	-	-	-	gi|105829624|gb|ABF74699.1|/3e-14/At3g45050 [Arabidopsis thaliana]
Unigene17793_Taxus	3	62	0.95	18.47	4.28111	6.69002e-05	0.000306225	-	-	-	gi|115468008|ref|NP_001057603.1|/7e-07/Os06g0360300 [Oryza sativa (japonica cultivar-group)] >gi|113595643|dbj|BAF19517.1| Os06g0360300 [Oryza sativa Japonica Group]
Unigene10829_Taxus	12	248	3.81	73.89	4.27752	3.2937e-07	2.29747e-06	-	-	-	-
Unigene28785_Taxus	2	41	0.63	12.21	4.27657	0.00010873	0.000470494	-	-	-	-
Unigene6800_Taxus	2	41	0.63	12.21	4.27657	0.00010873	0.00047038	-	-	-	-
Unigene35127_Taxus	32	657	10.15	195.74	4.26939	7.41852e-13	1.01506e-11	-	-	-	-
Unigene17605_Taxus	14	282	4.44	84.02	4.2421	9.01042e-08	6.8893e-07	-	-	-	gi|115480489|ref|NP_001063838.1|/9e-06/Os09g0546000 [Oryza sativa (japonica cultivar-group)] >gi|113632071|dbj|BAF25752.1| Os09g0546000 [Oryza sativa Japonica Group]
Unigene24406_Taxus	3	59	0.95	17.58	4.20986	6.69002e-05	0.000306382	-	-	-	-
Unigene6476_Taxus	4	78	1.27	23.24	4.19371	4.04544e-05	0.000192699	-	-	-	gi|166208407|gb|ABY84869.1|/9e-63/glutathione S transferase 1 [Pteris vittata] >gi|166208409|gb|ABY84870.1| glutathione S transferase 1 [Pteris vittata]
Unigene25519_Taxus	92	1787	29.17	532.4	4.18995	0	0	-	-	-	gi|131384|sp|P14226.1|PSBO_PEA/6e-33/RecName: Full=Oxygen-evolving enhancer protein 1, chloroplastic; Short=OEE1; AltName: Full=33 kDa subunit of oxygen evolving system of photosystem II; AltName: Full=OEC 33 kDa subunit; AltName: Full=33 kDa thylakoid membrane protein; Flags: Precursor >gi|344004|dbj|BAA02554.1| precursor for 33-kDa protein of photosystem II [Pisum sativum] >gi|226937|prf||16114…
Unigene18413_Taxus	6	116	1.9	34.56	4.18503	1.33745e-05	7.05351e-05	-	-	-	-
Unigene10101_Taxus	5	93	1.59	27.71	4.12331	2.35812e-05	0.000118672	-	-	-	-
Unigene3033_Taxus	5	91	1.59	27.11	4.09173	2.35812e-05	0.000118572	-	-	-	gi|238842518|gb|EEQ32180.1|/1e-35/ATPase [Microsporum canis CBS 113480]
Unigene33378_Taxus	21	375	6.66	111.72	4.06822	8.6986e-10	8.54747e-09	-	-	-	gi|148906885|gb|ABR16588.1|/1e-13/unknown [Picea sitchensis]
Unigene34901_Taxus	10	178	3.17	53.03	4.06425	1.1766e-06	7.44357e-06	-	-	-	gi|18415378|ref|NP_568178.1|/7e-46/proline-rich family protein [Arabidopsis thaliana]
Unigene7897_Taxus	5	89	1.59	26.52	4.05998	2.35812e-05	0.000118605	-	-	-	gi|148910324|gb|ABR18241.1|/6e-17/unknown [Picea sitchensis]
Unigene7111_Taxus	2	34	0.63	10.13	4.00714	0.000108758	0.000470386	-	-	-	gi|156972213|gb|ABU98940.1|/7e-32/early light-induced protein 3 [Rhododendron catawbiense]
Unigene25324_Taxus	92	1532	29.17	456.42	3.9678	0	0	-	-	-	-
Unigene11429_Taxus	4	66	1.27	19.66	3.95236	4.04544e-05	0.000192493	-	-	-	gi|226491834|ref|NP_001147590.1|/1e-06/chloroplast oxygen-evolving complex/thylakoid lumenal 25.6kDa protein [Zea mays] >gi|195612378|gb|ACG28019.1| chloroplast oxygen-evolving complex/thylakoid lumenal 25.6kDa protein [Zea mays]
Unigene10098_Taxus	11	181	3.49	53.92	3.94952	6.24632e-07	4.16304e-06	-	-	-	-
Unigene35870_Taxus	21	345	6.66	102.78	3.94789	8.6986e-10	8.55691e-09	-	-	-	gi|30693911|ref|NP_850698.1|/2e-12/rhomboid family protein [Arabidopsis thaliana]
Unigene11084_Taxus	2	32	0.63	9.53	3.91905	0.000108825	0.000470562	-	-	-	gi|108740354|gb|ABG01533.1|/1e-35/disease resistance protein [Arabidopsis thaliana] >gi|108740356|gb|ABG01534.1| disease resistance protein [Arabidopsis thaliana] >gi|108740378|gb|ABG01545.1| disease resistance protein [Arabidopsis thaliana] >gi|108740380|gb|ABG01546.1| disease resistance protein [Arabidopsis thaliana]
Unigene36187_Taxus	13	205	4.12	61.07	3.88975	1.7269e-07	1.26292e-06	-	-	-	gi|15220005|ref|NP_178105.1|/2e-30/oxidoreductase family protein [Arabidopsis thaliana] >gi|17978983|gb|AAL47452.1| At1g79870/F19K16_17 [Arabidopsis thaliana] >gi|21360429|gb|AAM47330.1| At1g79870/F19K16_17 [Arabidopsis thaliana]
Unigene22623_Taxus	5	79	1.59	23.54	3.88802	2.35812e-05	0.000118505	-	-	-	-
Unigene25505_Taxus	2	31	0.63	9.24	3.87447	0.000108904	0.000470791	-	-	-	-
Unigene12011_Taxus	7	106	2.22	31.58	3.83038	7.43304e-06	4.10603e-05	-	-	-	-
Unigene8837_Taxus	2	30	0.63	8.94	3.82685	0.000109049	0.000471302	-	-	-	-
Unigene35502_Taxus	15	226	4.76	67.33	3.82222	4.68192e-08	3.71695e-07	-	-	-	gi|116000819|emb|CAL50499.1|/2e-12/thylakoid lumen protein, chloroplast prec (ISS) [Ostreococcus tauri]
Unigene20310_Taxus	9	132	2.85	39.33	3.7866	2.1984e-06	1.32223e-05	GO:0009535//chloroplast thylakoid membrane	-	-	gi|255070859|ref|XP_002507511.1|/7e-06/nadh-nitrite reductase [Micromonas sp. RCC299] >gi|226522786|gb|ACO68769.1| nadh-nitrite reductase [Micromonas sp. RCC299]
Unigene15214_Taxus	39	565	12.37	168.33	3.76637	7.74936e-14	1.21634e-12	-	-	-	gi|108709557|gb|ABF97352.1|/2e-57/expressed protein [Oryza sativa (japonica cultivar-group)]
Unigene36388_Taxus	3	43	0.95	12.81	3.7532	6.6901e-05	0.000306071	GO:0009536//plastid	GO:0005488//binding;GO:0016787//hydrolase activity	-	gi|255940726|ref|XP_002561132.1|/6e-06/Pc16g08100 [Penicillium chrysogenum Wisconsin 54-1255] >gi|211585755|emb|CAP93480.1| Pc16g08100 [Penicillium chrysogenum Wisconsin 54-1255]
Unigene34817_Taxus	10	143	3.17	42.6	3.7483	1.1766e-06	7.45151e-06	-	-	-	gi|115456065|ref|NP_001051633.1|/8e-17/Os03g0805900 [Oryza sativa (japonica cultivar-group)] >gi|108711643|gb|ABF99438.1| Rieske domain containing protein, expressed [Oryza sativa (japonica cultivar-group)] >gi|113550104|dbj|BAF13547.1| Os03g0805900 [Oryza sativa Japonica Group]
Unigene19226_Taxus	2	28	0.63	8.34	3.72662	0.000109793	0.000474171	-	-	-	gi|20799725|gb|AAM28625.1|AF503767_1/1e-107/adenosine monophosphate binding protein 8 AMPBP8 [Arabidopsis thaliana]
Unigene5111_Taxus	6	84	1.9	25.03	3.71959	1.33745e-05	7.05142e-05	-	-	-	gi|18390044|gb|AAL68831.1|AF463407_2/8e-74/Enod8.2 [Medicago truncatula]
Unigene24418_Taxus	3	42	0.95	12.51	3.71901	6.69018e-05	0.000305996	-	-	-	-
Unigene26567_Taxus	4	56	1.27	16.68	3.71522	4.04544e-05	0.000192751	-	-	-	-
Unigene22212_Taxus	29	404	9.2	120.36	3.70958	4.38006e-12	5.47584e-11	-	-	-	-
Unigene812_Taxus	12	165	3.81	49.16	3.68962	3.2937e-07	2.29298e-06	-	-	-	gi|115483366|ref|NP_001065353.1|/1e-25/Os10g0556200 [Oryza sativa (japonica cultivar-group)] >gi|31433458|gb|AAP54971.1| Helix-loop-helix DNA-binding domain containing protein, expressed [Oryza sativa (japonica cultivar-group)] >gi|113639885|dbj|BAF27190.1| Os10g0556200 [Oryza sativa Japonica Group]
Unigene18303_Taxus	13	178	4.12	53.03	3.68609	1.7269e-07	1.26552e-06	-	-	-	gi|24266823|gb|AAN52360.1|/1e-109/5-alpha-taxadienol-10-beta-hydroxylase [Taxus wallichiana var. chinensis] >gi|42541090|gb|AAS19442.1| 5-alpha-taxadienol-10-beta-hydroxylase [Taxus wallichiana var. chinensis]
Unigene829_Taxus	6	82	1.9	24.43	3.68458	1.33745e-05	7.05768e-05	-	-	-	-
Unigene35840_Taxus	65	883	20.61	263.07	3.67403	0	0	-	-	-	gi|206574938|gb|ACI14382.1|/2e-76/cinnamoyl-CoA reductase [Vaccinium corymbosum]
Unigene36272_Taxus	2	27	0.63	8.04	3.67377	0.000110663	0.000477583	-	-	-	gi|62857206|dbj|BAD95882.1|/3e-66/glucosyltransferase [Ipomoea purpurea]
Unigene23335_Taxus	2	27	0.63	8.04	3.67377	0.000110663	0.000477467	-	-	-	-
Unigene34423_Taxus	26	349	8.24	103.98	3.65752	3.08114e-11	3.55278e-10	-	-	-	gi|116061765|emb|CAL52483.1|/9e-30/COG0426: Uncharacterized flavoproteins (ISS) [Ostreococcus tauri]
Unigene30760_Taxus	14	188	4.44	56.01	3.65705	9.01042e-08	6.87749e-07	-	-	-	gi|168026880|ref|XP_001765959.1|/9e-34/trehalose-6-phosphate synthase [Physcomitrella patens subsp. patens] >gi|162682865|gb|EDQ69280.1| trehalose-6-phosphate synthase [Physcomitrella patens subsp. patens]
Unigene13366_Taxus	9	120	2.85	35.75	3.64891	2.1984e-06	1.32045e-05	-	-	-	gi|159482266|ref|XP_001699192.1|/3e-07/pseudouridine synthase [Chlamydomonas reinhardtii] >gi|158273039|gb|EDO98832.1| pseudouridine synthase [Chlamydomonas reinhardtii]
Unigene1041_Taxus	6	79	1.9	23.54	3.63104	1.33745e-05	7.04516e-05	-	-	-	gi|255669962|dbj|BAH95476.1|/2e-31/Os12g0105375 [Oryza sativa Japonica Group]
Unigene32814_Taxus	2	26	0.63	7.75	3.62077	0.000112239	0.000484148	-	-	-	gi|20302473|emb|CAD30025.1|/2e-85/ferredoxin-NADP(H) oxidoreductase [Triticum aestivum]
Unigene32747_Taxus	17	220	5.39	65.54	3.60402	1.25136e-08	1.06767e-07	-	-	-	-
Unigene17548_Taxus	8	102	2.54	30.39	3.5807	4.06722e-06	2.3396e-05	-	-	-	gi|159479580|ref|XP_001697868.1|/8e-18/rubisco large subunit N-methyltransferase [Chlamydomonas reinhardtii] >gi|158273966|gb|EDO99751.1| rubisco large subunit N-methyltransferase [Chlamydomonas reinhardtii]
Unigene26383_Taxus	7	89	2.22	26.52	3.57845	7.43304e-06	4.09841e-05	GO:0009535//chloroplast thylakoid membrane	-	-	gi|3090403|emb|CAA06667.1|/1e-07/cytochrome b6f complex subunit [Arabidopsis thaliana]
Unigene31091_Taxus	25	317	7.93	94.44	3.57401	5.98666e-11	6.6533e-10	-	-	-	-
Unigene59_Taxus	98	1238	31.08	368.83	3.5689	0	0	-	-	-	gi|15229066|ref|NP_188379.1|/2e-15/late embryogenesis abundant domain-containing protein / LEA domain-containing protein [Arabidopsis thaliana]
Unigene1902_Taxus	2	25	0.63	7.45	3.56382	0.000115084	0.000495821	-	-	-	-
Unigene5033_Taxus	2	25	0.63	7.45	3.56382	0.000115084	0.000495701	-	-	-	-
Unigene8058_Taxus	2	25	0.63	7.45	3.56382	0.000115084	0.000495581	-	-	-	gi|226531147|ref|NP_001150609.1|/4e-42/anthocyanidin 3-O-glucosyltransferase [Zea mays] >gi|195640540|gb|ACG39738.1| anthocyanidin 3-O-glucosyltransferase [Zea mays]
Unigene31415_Taxus	2	25	0.63	7.45	3.56382	0.000115084	0.000495461	-	-	-	gi|2244825|emb|CAB10248.1|/4e-17/light induced protein like [Arabidopsis thaliana] >gi|7268175|emb|CAB78511.1| light induced protein like [Arabidopsis thaliana]
Unigene4649_Taxus	2	25	0.63	7.45	3.56382	0.000115084	0.000495341	-	-	-	gi|116778967|gb|ABK21078.1|/3e-21/unknown [Picea sitchensis]
Unigene12009_Taxus	44	552	13.95	164.46	3.5594	4.70734e-14	7.67258e-13	-	-	-	-
Unigene31825_Taxus	914	11444	289.84	3409.47	3.55622	0	0	-	-	-	-
Unigene30717_Taxus	7	87	2.22	25.92	3.54543	7.43304e-06	4.09968e-05	-	-	-	gi|18400342|ref|NP_565556.1|/7e-13/YCF37 (Arabidopsis homolog of Synechocystis YCF37) [Arabidopsis thaliana] >gi|3152615|gb|AAC17094.1| expressed protein [Arabidopsis thaliana] >gi|16648702|gb|AAL25543.1| At2g23670/F26B6.32 [Arabidopsis thaliana] >gi|20197003|gb|AAM14867.1| expressed protein [Arabidopsis thaliana] >gi|20334912|gb|AAM16212.1| At2g23670/F26B6.32 [Arabidopsis thaliana] >gi|206748360…
Unigene26852_Taxus	9	110	2.85	32.77	3.52334	2.1984e-06	1.31778e-05	-	-	-	-
Unigene1415_Taxus	95	1160	30.13	345.6	3.51983	0	0	-	-	-	gi|195651995|gb|ACG45465.1|/2e-55/phospholipid hydroperoxide glutathione peroxidase [Zea mays]
Unigene27254_Taxus	6	73	1.9	21.75	3.51694	1.33745e-05	7.05559e-05	-	-	-	-
Unigene7769_Taxus	36	437	11.42	130.19	3.51098	1.21902e-13	1.84042e-12	-	-	-	-
Unigene17547_Taxus	2	24	0.63	7.15	3.50452	0.000120208	0.000515902	-	-	-	gi|115436404|ref|NP_001042960.1|/2e-07/Os01g0343500 [Oryza sativa (japonica cultivar-group)] >gi|113532491|dbj|BAF04874.1| Os01g0343500 [Oryza sativa Japonica Group]
Unigene1441_Taxus	5	60	1.59	17.88	3.49125	2.35812e-05	0.000118538	-	-	-	gi|124359951|gb|ABN07967.1|/2e-13/4Fe-4S ferredoxin, iron-sulfur binding [Medicago truncatula]
Unigene17174_Taxus	5	60	1.59	17.88	3.49125	2.35812e-05	0.000118471	-	-	-	gi|108862482|gb|ABA97463.2|/3e-12/expressed protein [Oryza sativa (japonica cultivar-group)]
Unigene34455_Taxus	28	335	8.88	99.81	3.49055	8.2645e-12	9.98861e-11	-	-	-	gi|115483154|ref|NP_001065170.1|/2e-13/Os10g0536500 [Oryza sativa (japonica cultivar-group)] >gi|31433274|gb|AAP54812.1| expressed protein [Oryza sativa (japonica cultivar-group)] >gi|113639779|dbj|BAF27084.1| Os10g0536500 [Oryza sativa Japonica Group]
Unigene5010_Taxus	23	270	7.29	80.44	3.46392	2.2791e-10	2.38136e-09	-	-	-	gi|85540586|gb|ABC70464.1|/1e-15/CASTOR protein [Glycine max]
Unigene35955_Taxus	19	223	6.03	66.44	3.46182	3.31036e-09	3.02276e-08	-	-	-	gi|116058263|emb|CAL53452.1|/2e-38/ribulose-phosphate 3-epimerase (IC) [Ostreococcus tauri]
Unigene34490_Taxus	17	199	5.39	59.29	3.45943	1.25136e-08	1.06869e-07	-	-	-	gi|196122124|gb|ACG69537.1|/6e-67/caleosin CLO1-5 [Brassica napus]
Unigene19790_Taxus	10	117	3.17	34.86	3.45902	1.1766e-06	7.44886e-06	-	-	-	gi|22328974|ref|NP_194472.2|/3e-25/ABC transporter family protein [Arabidopsis thaliana]
Unigene3178_Taxus	3	35	0.95	10.43	3.45667	6.69998e-05	0.000306366	-	-	-	-
Unigene24147_Taxus	3	35	0.95	10.43	3.45667	6.69998e-05	0.000306287	-	-	-	-
Unigene7703_Taxus	3	35	0.95	10.43	3.45667	6.69998e-05	0.000306209	-	-	-	gi|226499026|ref|NP_001151281.1|/5e-06/MTD1 [Zea mays] >gi|195645510|gb|ACG42223.1| MTD1 [Zea mays]
Unigene32085_Taxus	17	198	5.39	58.99	3.45211	1.25136e-08	1.06716e-07	-	-	-	gi|56549229|gb|AAV97732.1|/2e-12/lipid transfer protein [Capsicum chinense] >gi|56549231|gb|AAV97733.1| lipid transfer protein [Capsicum chinense] >gi|56549233|gb|AAV97734.1| lipid transfer protein [Capsicum annuum] >gi|56549235|gb|AAV97735.1| lipid transfer protein [Capsicum annuum]
Unigene6248_Taxus	2	23	0.63	6.85	3.44268	0.00012941	0.00055062	-	-	-	-
Unigene17128_Taxus	16	185	5.07	55.12	3.44252	2.42416e-08	1.98376e-07	-	-	-	gi|238033777|emb|CAY71799.1|/6e-07/Hypothetical protein [Pichia pastoris GS115]
Unigene15580_Taxus	5	58	1.59	17.28	3.442	2.35812e-05	0.000118706	-	-	-	gi|5902368|gb|AAD55470.1|AC009322_10/2e-06/Unknown protein [Arabidopsis thaliana]
Unigene31780_Taxus	19	217	6.03	64.65	3.42242	3.31036e-09	3.02586e-08	-	-	-	gi|116783473|gb|ABK22956.1|/3e-12/unknown [Picea sitchensis]
Unigene33200_Taxus	3	34	0.95	10.13	3.41456	6.7079e-05	0.000306492	-	-	-	gi|255676594|dbj|BAF18300.2|/1e-23/Os05g0574000 [Oryza sativa Japonica Group]
Unigene11367_Taxus	74	840	23.47	250.26	3.41454	0	0	-	-	-	-
Unigene16706_Taxus	10	112	3.17	33.37	3.396	1.1766e-06	7.44621e-06	-	-	-	-
Unigene35770_Taxus	5	56	1.59	16.68	3.39102	2.35812e-05	0.000118438	-	-	-	gi|224003627|ref|XP_002291485.1|/1e-120/chloroplast ftsH [Thalassiosira pseudonana CCMP1335] >gi|220973261|gb|EED91592.1| chloroplast ftsH [Thalassiosira pseudonana CCMP1335]
Unigene14472_Taxus	12	134	3.81	39.92	3.38925	3.2937e-07	2.29567e-06	-	-	-	-
Unigene28499_Taxus	46	511	14.59	152.24	3.3833	4.24106e-14	6.97641e-13	-	-	-	-
Unigene14957_Taxus	2	22	0.63	6.55	3.37807	0.000145886	0.000616011	-	-	-	gi|168054173|ref|XP_001779507.1|/2e-31/single bromodomain-containing protein [Physcomitrella patens subsp. patens] >gi|162669089|gb|EDQ55683.1| single bromodomain-containing protein [Physcomitrella patens subsp. patens]
Unigene35987_Taxus	4	44	1.27	13.11	3.36777	4.04574e-05	0.000192456	-	-	-	gi|159469530|ref|XP_001692916.1|/2e-25/flavodoxin-like protein [Chlamydomonas reinhardtii] >gi|158277718|gb|EDP03485.1| flavodoxin-like protein [Chlamydomonas reinhardtii]
Unigene30938_Taxus	11	120	3.49	35.75	3.35664	6.24632e-07	4.1646e-06	-	-	-	gi|159478056|ref|XP_001697120.1|/2e-09/thylakoid lumenal protein [Chlamydomonas reinhardtii] >gi|158274594|gb|EDP00375.1| thylakoid lumenal protein [Chlamydomonas reinhardtii]
Unigene2650_Taxus	4	43	1.27	12.81	3.33437	4.04596e-05	0.000192415	-	-	-	gi|3914402|sp|O24163.1|PPOC_TOBAC/1e-41/RecName: Full=Protoporphyrinogen oxidase, chloroplastic; Short=PPO; AltName: Full=Protoporphyrinogen IX oxidase isozyme I; Short=PPO I; Short=PPX I; Flags: Precursor >gi|2370333|emb|CAA73865.1| protoporphyrinogen oxidase [Nicotiana tabacum]
Unigene9543_Taxus	19	204	6.03	60.78	3.33337	3.31036e-09	3.01967e-08	-	-	-	gi|18424319|ref|NP_568919.1|/2e-45/APRR3 (ARABIDOPSIS PSEUDO-RESPONSE REGULATOR 3); transcription regulator/ two-component response regulator [Arabidopsis thaliana] >gi|52783244|sp|Q9LVG4.1|APRR3_ARATH RecName: Full=Two-component response regulator-like APRR3; AltName: Full=Pseudo-response regulator 3 >gi|10281008|dbj|BAB13744.1| pseudo-response regulator 3 [Arabidopsis thaliana]
Unigene6741_Taxus	13	139	4.12	41.41	3.32926	1.7269e-07	1.26448e-06	-	-	-	-
Unigene21368_Taxus	10	106	3.17	31.58	3.31646	1.1766e-06	7.43829e-06	-	-	-	gi|115470333|ref|NP_001058765.1|/2e-52/Os07g0118300 [Oryza sativa (japonica cultivar-group)] >gi|113610301|dbj|BAF20679.1| Os07g0118300 [Oryza sativa Japonica Group]
Unigene7055_Taxus	2	21	0.63	6.26	3.31274	0.000175283	0.00072351	-	-	-	gi|111378715|gb|ABH09266.1|/2e-08/KHG/KDPG aldolase [Paulinella chromatophora]
Unigene23244_Taxus	14	148	4.44	44.09	3.31182	9.01042e-08	6.88044e-07	-	-	-	-
Unigene2137_Taxus	6	63	1.9	18.77	3.30436	1.33746e-05	7.03893e-05	-	-	-	gi|255674937|dbj|BAF13336.2|/8e-12/Os03g0774400 [Oryza sativa Japonica Group]
Unigene17218_Taxus	4	42	1.27	12.51	3.30018	4.04638e-05	0.000192384	-	-	-	gi|255679666|dbj|BAH95015.1|/1e-05/Os10g0575401 [Oryza sativa Japonica Group]
Unigene14093_Taxus	39	404	12.37	120.36	3.28244	7.74936e-14	1.21741e-12	-	-	-	-
Unigene36370_Taxus	3	31	0.95	9.24	3.28189	6.7921e-05	0.000310021	-	-	-	gi|15221382|ref|NP_177616.1|/2e-96/nodulin family protein [Arabidopsis thaliana] >gi|5882744|gb|AAD55297.1|AC008263_28 Strong similarity to gb|AF031243 nodule-specific protein (Nlj70) from Lotus japonicus and is a member of the PF|00083 Sugar (and other) transporter family. EST gb|Z37715 comes from this gene [Arabidopsis thaliana]
Unigene21218_Taxus	3	31	0.95	9.24	3.28189	6.7921e-05	0.000309942	-	-	-	gi|115457714|ref|NP_001052457.1|/1e-135/Os04g0320100 [Oryza sativa (japonica cultivar-group)] >gi|113564028|dbj|BAF14371.1| Os04g0320100 [Oryza sativa Japonica Group]
Unigene8064_Taxus	35	360	11.1	107.25	3.27235	1.70752e-13	2.53285e-12	-	-	-	-
Unigene13023_Taxus	7	72	2.22	21.45	3.27235	7.43304e-06	4.09208e-05	-	-	-	gi|224713522|gb|ACN62068.1|/3e-21/PPR-814b [Zea mays]
Unigene26617_Taxus	22	226	6.98	67.33	3.26995	4.45316e-10	4.51526e-09	-	-	-	-
Unigene21489_Taxus	39	400	12.37	119.17	3.2681	7.74936e-14	1.22064e-12	-	-	-	gi|199430494|emb|CAG85869.2|/1e-101/DEHA2C03234p [Debaryomyces hansenii]
Unigene31489_Taxus	6	61	1.9	18.17	3.25749	1.33746e-05	7.04101e-05	-	-	-	-
Unigene23367_Taxus	2	20	0.63	5.96	3.24189	0.000227548	0.00092152	-	-	-	-
Unigene20080_Taxus	2	20	0.63	5.96	3.24189	0.000227548	0.000921311	-	-	-	gi|21655189|gb|AAM28909.1|/5e-06/NBS/LRR [Pinus taeda]
Unigene24675_Taxus	43	433	13.64	129	3.24146	8.65974e-14	1.34854e-12	-	-	-	-
Unigene32725_Taxus	58	582	18.39	173.39	3.23703	0	0	-	-	-	gi|255676391|dbj|BAH93166.1|/1e-19/Os05g0429600 [Oryza sativa Japonica Group]
Unigene12175_Taxus	3	30	0.95	8.94	3.23428	6.8716e-05	0.000312768	-	-	-	-
Unigene29744_Taxus	3	30	0.95	8.94	3.23428	6.8716e-05	0.000312689	-	-	-	-
Unigene895_Taxus	3	30	0.95	8.94	3.23428	6.8716e-05	0.000312609	-	-	-	-
Unigene3668_Taxus	9	90	2.85	26.81	3.23374	2.1984e-06	1.31956e-05	-	-	-	gi|7804485|dbj|BAA95669.1|/0.0/phototropin [Adiantum capillus-veneris]
Unigene15618_Taxus	16	160	5.07	47.67	3.23302	2.42416e-08	1.98741e-07	-	-	-	gi|162462506|ref|NP_001105125.1|/0.0/outer cell layer3 [Zea mays] >gi|8920423|emb|CAB96423.1| OCL3 protein [Zea mays]
Unigene20922_Taxus	4	40	1.27	11.92	3.23048	4.04836e-05	0.000192427	-	-	-	gi|32487575|emb|CAE04461.1|/1e-44/OSJNBa0029L02.2 [Oryza sativa (japonica cultivar-group)]
Unigene2041_Taxus	4	40	1.27	11.92	3.23048	4.04836e-05	0.000192375	-	-	-	gi|7573420|emb|CAB87736.1|/5e-07/translation releasing factor RF-1-like protein [Arabidopsis thaliana]
Unigene14706_Taxus	5	50	1.59	14.9	3.22821	2.35818e-05	0.000118407	-	-	-	gi|5302799|emb|CAB46041.1|/1e-52/gibberellin oxidase-like protein [Arabidopsis thaliana] >gi|7268427|emb|CAB78719.1| gibberellin oxidase-like protein [Arabidopsis thaliana]
Unigene30374_Taxus	57	565	18.08	168.33	3.21883	6.88338e-15	1.20696e-13	-	-	-	gi|119906|sp|P00455.1|FENR_SPIOL/6e-06/RecName: Full=Ferredoxin--NADP reductase, chloroplastic; Short=FNR; Flags: Precursor
Unigene36144_Taxus	472	4669	149.67	1391.02	3.21629	0	0	-	-	-	gi|290579519|gb|ADD51355.1|/3e-55/anthocyanidin synthase [Theobroma cacao]
Unigene26635_Taxus	90	890	28.54	265.15	3.21575	0	0	-	-	-	-
Unigene11308_Taxus	7	69	2.22	20.56	3.21121	7.43304e-06	4.10222e-05	-	-	-	gi|109946535|gb|ABG48446.1|/1e-15/At4g13500 [Arabidopsis thaliana]
Unigene27157_Taxus	88	863	27.91	257.11	3.20353	0	0	-	-	-	-
Unigene21249_Taxus	10	98	3.17	29.2	3.20341	1.1766e-06	7.45416e-06	-	-	-	gi|50551771|ref|XP_503360.1|/8e-08/YALI0E00132p [Yarrowia lipolytica] >gi|49649229|emb|CAG78939.1| YALI0E00132p [Yarrowia lipolytica]
Unigene11018_Taxus	9	88	2.85	26.22	3.20163	2.1984e-06	1.31867e-05	-	-	-	-
Unigene27851_Taxus	3	29	0.95	8.64	3.18503	7.01218e-05	0.000318029	-	-	-	-
Unigene18990_Taxus	5	48	1.59	14.3	3.16892	2.35828e-05	0.000118379	-	-	-	gi|195643808|gb|ACG41372.1|/1e-36/cytochrome b561 [Zea mays]
Unigene29611_Taxus	20	190	6.34	56.61	3.1585	1.69797e-09	1.60219e-08	-	-	-	-
Unigene12839_Taxus	4	38	1.27	11.32	3.15597	4.05458e-05	0.00019262	-	-	-	gi|115489108|ref|NP_001067041.1|/1e-09/Os12g0564400 [Oryza sativa (japonica cultivar-group)] >gi|113649548|dbj|BAF30060.1| Os12g0564400 [Oryza sativa Japonica Group]
Unigene7908_Taxus	8	76	2.54	22.64	3.15597	4.06722e-06	2.33885e-05	-	-	-	gi|224286611|gb|ACN41010.1|/3e-09/unknown [Picea sitchensis]
Unigene19514_Taxus	7	66	2.22	19.66	3.14663	7.43304e-06	4.09461e-05	-	-	-	gi|240273024|gb|EER36547.1|/3e-13/catechol O-methyltransferase [Ajellomyces capsulatus H143]
Unigene62_Taxus	7	65	2.22	19.37	3.12519	7.43304e-06	4.10476e-05	-	-	-	gi|138996985|dbj|BAF52855.1|/3e-15/repressor of silencing 1 [Nicotiana tabacum]
Unigene12307_Taxus	7	65	2.22	19.37	3.12519	7.43304e-06	4.09714e-05	-	-	-	gi|68565236|sp|Q8W571.2|ATL4O_ARATH/6e-21/RecName: Full=RING-H2 finger protein ATL4O; Flags: Precursor
Unigene1451_Taxus	12	111	3.81	33.07	3.11766	3.2937e-07	2.29927e-06	-	-	-	gi|116786226|gb|ABK24030.1|/8e-10/unknown [Picea sitchensis]
Unigene33668_Taxus	65	596	20.61	177.56	3.10689	0	0	-	-	-	gi|224067104|ref|XP_002302357.1|/1e-28/precursor of transferase serine hydroxymethyltransferase 3 [Populus trichocarpa] >gi|222844083|gb|EEE81630.1| precursor of transferase serine hydroxymethyltransferase 3 [Populus trichocarpa]
Unigene32305_Taxus	10	90	3.17	26.81	3.08022	1.1766e-06	7.45946e-06	-	-	-	gi|222424621|dbj|BAH20265.1|/2e-11/AT1G28100 [Arabidopsis thaliana]
Unigene17762_Taxus	5	45	1.59	13.41	3.07621	2.35894e-05	0.000118379	-	-	-	gi|159466422|ref|XP_001691408.1|/5e-08/peptidyl-prolyl cis-trans isomerase, cyclophilin-type [Chlamydomonas reinhardtii] >gi|158279380|gb|EDP05141.1| peptidyl-prolyl cis-trans isomerase, cyclophilin-type [Chlamydomonas reinhardtii]
Unigene20079_Taxus	9	80	2.85	23.83	3.06375	2.1984e-06	1.32089e-05	GO:0044464//cell part	-	-	gi|145079082|tpg|DAA05897.1|/3e-58/TPA: TPA_inf: chloroplast light-harvesting protein CP29 precursor Lhcb4 [Acetabularia acetabulum]
Unigene27715_Taxus	47	418	14.9	124.53	3.06311	0	0	-	-	-	-
Unigene2744_Taxus	32	281	10.15	83.72	3.04409	7.41852e-13	1.01428e-11	-	-	-	-
Unigene27615_Taxus	5	44	1.59	13.11	3.04357	2.35956e-05	0.000118377	-	-	-	gi|195646170|gb|ACG42553.1|/2e-08/ATP synthase F1, delta subunit family protein [Zea mays]
Unigene22485_Taxus	44	385	13.95	114.7	3.03953	4.70734e-14	7.65158e-13	-	-	-	-
Unigene26690_Taxus	4	35	1.27	10.43	3.03784	4.09522e-05	0.000194343	-	-	-	-
Unigene21571_Taxus	4	35	1.27	10.43	3.03784	4.09522e-05	0.000194291	-	-	-	-
Unigene16265_Taxus	24	209	7.61	62.27	3.03257	1.16749e-10	1.25521e-09	-	-	-	gi|115445721|ref|NP_001046640.1|/3e-13/Os02g0306900 [Oryza sativa (japonica cultivar-group)] >gi|73858555|gb|AAD29703.2|AF140490_1 heat-shock protein DnaJ [Oryza sativa Japonica Group] >gi|113536171|dbj|BAF08554.1| Os02g0306900 [Oryza sativa Japonica Group]
Unigene10296_Taxus	13	113	4.12	33.67	3.03075	1.7269e-07	1.26188e-06	-	-	-	gi|115468472|ref|NP_001057835.1|/3e-07/Os06g0550800 [Oryza sativa (japonica cultivar-group)] >gi|113595875|dbj|BAF19749.1| Os06g0550800 [Oryza sativa Japonica Group]
Unigene8017_Taxus	3	26	0.95	7.75	3.0282	8.45902e-05	0.000374776	-	-	-	gi|116058031|emb|CAL54234.1|/6e-07/GDP-mannose 4,6 dehydratase (ISS) [Ostreococcus tauri]
Unigene10542_Taxus	18	156	5.71	46.48	3.02505	6.44302e-09	5.67387e-08	-	-	-	-
Unigene12908_Taxus	61	528	19.34	157.31	3.02395	0	0	-	-	-	gi|15241248|ref|NP_200466.1|/1e-06/OXS3 (OXIDATIVE STRESS 3) [Arabidopsis thaliana]
Unigene22879_Taxus	30	259	9.51	77.16	3.02034	2.33724e-12	2.99769e-11	-	-	-	-
Unigene34422_Taxus	31	267	9.83	79.55	3.0166	1.28808e-12	1.70992e-11	-	-	-	gi|1175703|sp|P46314.1|YCF23_ANTSP/4e-09/RecName: Full=Uncharacterized protein ycf23
Unigene30600_Taxus	51	439	16.17	130.79	3.01586	0	0	-	-	-	gi|255677819|dbj|BAF21718.2|/6e-23/Os07g0520800 [Oryza sativa Japonica Group]
Unigene11302_Taxus	5	43	1.59	12.81	3.01017	2.36064e-05	0.000118398	-	-	-	gi|15240340|ref|NP_198593.1|/3e-31/TCH2 (TOUCH 2); calcium ion binding [Arabidopsis thaliana] >gi|3123295|sp|P25070.2|CML24_ARATH RecName: Full=Calcium-binding protein CML24; AltName: Full=Calmodulin-like protein 24; AltName: Full=Touch-induced calmodulin-related protein 2 >gi|2583169|gb|AAB82713.1| calmodulin-related protein [Arabidopsis thaliana] >gi|10177164|dbj|BAB10353.1| calmodulin-related …
Unigene35315_Taxus	141	1209	44.71	360.19	3.01009	0	0	-	-	-	gi|159478022|ref|XP_001697103.1|/1e-100/membrane AAA-metalloprotease [Chlamydomonas reinhardtii] >gi|158274577|gb|EDP00358.1| membrane AAA-metalloprotease [Chlamydomonas reinhardtii]
Unigene8732_Taxus	9	77	2.85	22.94	3.00883	2.1984e-06	1.32e-05	-	-	-	gi|18423226|ref|NP_568749.1|/4e-14/rubredoxin family protein [Arabidopsis thaliana]
Unigene33116_Taxus	18	154	5.71	45.88	3.0063	6.44302e-09	5.66547e-08	-	-	-	gi|159468261|ref|XP_001692301.1|/1e-06/heme peroxidase-related protein [Chlamydomonas reinhardtii] >gi|158278487|gb|EDP04251.1| heme peroxidase-related protein [Chlamydomonas reinhardtii]
Unigene26680_Taxus	76	647	24.1	192.76	2.9997	0	0	-	-	-	-
Unigene4705_Taxus	6	51	1.9	15.19	2.99905	1.33758e-05	7.03752e-05	-	GO:0005488//binding	GO:0006979//response to oxidative stress;GO:0009628//response to abiotic stimulus;GO:0009737//response to abscisic acid stimulus;GO:0006281//DNA repair	gi|195653273|gb|ACG46104.1|/1e-06/phosphoesterase [Zea mays]
Unigene19900_Taxus	6	51	1.9	15.19	2.99905	1.33758e-05	7.03545e-05	-	-	-	gi|255670559|dbj|BAH91509.1|/2e-23/Os02g0122500 [Oryza sativa Japonica Group]
Unigene36294_Taxus	12	102	3.81	30.39	2.99573	3.2937e-07	2.30107e-06	-	-	-	gi|45861215|gb|AAS78484.1|/3e-35/CCAAT-box transcription factor complex WHAP10 [Triticum aestivum]
Unigene17869_Taxus	13	110	4.12	32.77	2.99166	1.7269e-07	1.26344e-06	-	-	-	gi|8901180|gb|AAF65464.2|AF247700_1/3e-09/peroxidase POC1 [Oryza sativa Indica Group]
Unigene15554_Taxus	4	33	1.27	9.83	2.95236	4.19774e-05	0.000198943	-	-	-	-
Unigene32707_Taxus	4	33	1.27	9.83	2.95236	4.19774e-05	0.00019889	-	-	-	-
Unigene13544_Taxus	45	370	14.27	110.23	2.94946	0	0	-	-	-	-
Unigene15715_Taxus	19	156	6.03	46.48	2.94638	3.31036e-09	3.02742e-08	-	-	-	gi|283136054|gb|ADB11346.1|/1e-42/tau class glutathione transferase GSTU4 [Populus trichocarpa]
Unigene36059_Taxus	37	303	11.73	90.27	2.94404	9.10382e-14	1.41153e-12	-	-	-	gi|226453691|gb|EEH50999.1|/5e-09/heat shock protein 70 with TPR repeat [Micromonas pusilla CCMP1545]
Unigene31183_Taxus	55	449	17.44	133.77	2.93928	0	0	-	-	-	gi|261190885|ref|XP_002621851.1|/2e-07/cytokinesis protein sepA [Ajellomyces dermatitidis SLH14081] >gi|239590895|gb|EEQ73476.1| cytokinesis protein sepA [Ajellomyces dermatitidis SLH14081]
Unigene14996_Taxus	7	57	2.22	16.98	2.9352	7.43324e-06	4.09092e-05	-	-	-	-
Unigene2562_Taxus	7	57	2.22	16.98	2.9352	7.43324e-06	4.08966e-05	-	GO:0016747//transferase activity, transferring acyl groups other than amino-acyl groups	GO:0008152//metabolic process	gi|15239981|ref|NP_199189.1|/4e-79/KCS20 (3-KETOACYL-COA SYNTHASE 20); fatty acid elongase [Arabidopsis thaliana] >gi|75262422|sp|Q9FG87.1|KCS19_ARATH RecName: Full=3-ketoacyl-CoA synthase 19; Short=KCS-19; AltName: Full=Very long-chain fatty acid condensing enzyme 19; Short=VLCFA condensing enzyme 19 >gi|15983491|gb|AAL11613.1|AF424620_1 AT5g43760/MQD19_11 [Arabidopsis thaliana] >gi|10177945|dbj…
Unigene12327_Taxus	15	122	4.76	36.35	2.93292	4.68192e-08	3.72027e-07	GO:0009536//plastid	GO:0004672//protein kinase activity	GO:0044237//cellular metabolic process	gi|224146552|ref|XP_002326048.1|/8e-18/thioredoxin m [Populus trichocarpa] >gi|222862923|gb|EEF00430.1| thioredoxin m [Populus trichocarpa]
Unigene36074_Taxus	8	65	2.54	19.37	2.93092	4.06724e-06	2.33735e-05	-	-	-	gi|5804780|dbj|BAA83595.1|/6e-10/chloroplast ascorbate peroxidase [Chlamydomonas sp. W80]
Unigene31884_Taxus	10	81	3.17	24.13	2.92827	1.1766e-06	7.44093e-06	-	-	-	-
Unigene34235_Taxus	29	235	9.2	70.01	2.92786	4.38006e-12	5.46434e-11	-	-	-	gi|115461627|ref|NP_001054413.1|/6e-18/Os05g0105800 [Oryza sativa (japonica cultivar-group)]
Unigene4010_Taxus	16	129	5.07	38.43	2.92218	2.42416e-08	1.98467e-07	-	-	-	-
Unigene17148_Taxus	3	24	0.95	7.15	2.91194	0.000121081	0.000519272	-	-	-	-
Unigene30457_Taxus	7	56	2.22	16.68	2.90949	7.4334e-06	4.08848e-05	-	-	-	gi|77555056|gb|ABA97852.1|/3e-06/Zinc knuckle family protein [Oryza sativa (japonica cultivar-group)]
Unigene21362_Taxus	4	32	1.27	9.53	2.90765	4.31074e-05	0.000204081	-	-	-	gi|85813983|emb|CAD20831.2|/4e-48/sigma factor [Spinacia oleracea]
Unigene18243_Taxus	5	40	1.59	11.92	2.90629	2.37148e-05	0.000118908	-	-	-	gi|195620172|gb|ACG31916.1|/3e-24/RHC1A [Zea mays]
Unigene3097_Taxus	14	111	4.44	33.07	2.89689	9.01042e-08	6.89522e-07	-	-	-	gi|42541167|gb|AAS19475.1|/9e-60/MYB1 [Tradescantia fluminensis]
Unigene15141_Taxus	11	87	3.49	25.92	2.89277	6.24632e-07	4.16616e-06	-	-	-	-
Unigene20244_Taxus	23	180	7.29	53.63	2.87905	2.2791e-10	2.37996e-09	-	GO:0003676//nucleic acid binding	-	gi|2331131|gb|AAB66884.1|/1e-12/glycine-rich protein [Oryza sativa Japonica Group]
Unigene21165_Taxus	9	70	2.85	20.85	2.87101	2.1984e-06	1.31911e-05	-	-	-	gi|147637465|sp|Q0J9W0.2|CCP11_ORYSJ/4e-24/RecName: Full=Cyclin-P1-1; Short=CycP1;1 >gi|39546240|emb|CAE04249.3| OSJNBa0089N06.10 [Oryza sativa (japonica cultivar-group)]
Unigene32092_Taxus	5	39	1.59	11.62	2.86951	2.38128e-05	0.000119366	-	-	-	gi|68131792|gb|AAY85180.1|/2e-30/pectate lyase [Gossypium hirsutum]
Unigene27829_Taxus	4	31	1.27	9.24	2.86306	4.50618e-05	0.000212769	-	-	-	gi|2739046|gb|AAB94599.1|/8e-06/polyphosphoinositide binding protein Ssh2p [Glycine max]
Unigene15195_Taxus	41	311	13	92.66	2.83344	1.06137e-13	1.61887e-12	-	-	-	gi|585467|sp|P37229.1|MDHP2_SORBI/1e-175/RecName: Full=Malate dehydrogenase [NADP] 2, chloroplastic; AltName: Full=NADP-MDH-2; Flags: Precursor >gi|14249|emb|CAA38270.1| malate dehydrogenase (NADP+) [Sorghum bicolor] >gi|7548842|gb|AAB19835.2| NADP-malate dehydrogenase [Sorghum bicolor]
Unigene22856_Taxus	195	1478	61.84	440.34	2.83201	9.79216e-14	1.50386e-12	-	-	-	gi|148908683|gb|ABR17449.1|/3e-13/unknown [Picea sitchensis]
Unigene32367_Taxus	5	38	1.59	11.32	2.83178	2.3982e-05	0.000120079	-	-	-	gi|224115768|ref|XP_002332052.1|/9e-06/magnesium transporter [Populus trichocarpa] >gi|222831938|gb|EEE70415.1| magnesium transporter [Populus trichocarpa]
Unigene15070_Taxus	47	356	14.9	106.06	2.8315	0	0	-	-	-	gi|115442259|ref|NP_001045409.1|/1e-121/Os01g0950900 [Oryza sativa (japonica cultivar-group)] >gi|57900474|dbj|BAD87886.1| early-responsive to dehydration protein-like [Oryza sativa Japonica Group] >gi|113534940|dbj|BAF07323.1| Os01g0950900 [Oryza sativa Japonica Group]
Unigene17659_Taxus	12	91	3.81	27.11	2.83096	3.2937e-07	2.29657e-06	-	-	-	gi|224113419|ref|XP_002316491.1|/1e-119/cationic amino acid transporter [Populus trichocarpa] >gi|222865531|gb|EEF02662.1| cationic amino acid transporter [Populus trichocarpa]
Unigene3885_Taxus	7	53	2.22	15.79	2.83038	7.43488e-06	4.08804e-05	-	-	-	gi|220030884|gb|ACL78607.1|/1e-103/pseudo-response receiver [Hordeum vulgare subsp. spontaneum] >gi|220030908|gb|ACL78619.1| pseudo-response receiver [Hordeum vulgare subsp. spontaneum]
Unigene15795_Taxus	9	68	2.85	20.26	2.8296	2.19842e-06	1.31735e-05	-	-	-	gi|226494115|ref|NP_001148440.1|/4e-51/short-chain dehydrogenase/reductase SDR [Zea mays] >gi|195619288|gb|ACG31474.1| short-chain dehydrogenase/reductase SDR [Zea mays]
Unigene36216_Taxus	16	120	5.07	35.75	2.81789	2.42416e-08	1.9865e-07	-	-	-	gi|115434196|ref|NP_001041856.1|/8e-75/Os01g0117900 [Oryza sativa (japonica cultivar-group)] >gi|113531387|dbj|BAF03770.1| Os01g0117900 [Oryza sativa Japonica Group]
Unigene36016_Taxus	10	75	3.17	22.34	2.81707	1.1766e-06	7.45681e-06	-	-	-	gi|79325958|ref|NP_001031763.1|/3e-83/ABC1 family protein [Arabidopsis thaliana]
Unigene24468_Taxus	22	165	6.98	49.16	2.81619	4.45316e-10	4.51269e-09	-	-	-	-
Unigene56_Taxus	4	30	1.27	8.94	2.81545	4.84316e-05	0.000227774	-	-	-	gi|195614456|gb|ACG29058.1|/2e-46/lectin receptor-type protein kinase [Zea mays]
Unigene18942_Taxus	13	97	4.12	28.9	2.81035	1.7269e-07	1.26396e-06	-	-	-	gi|115462531|ref|NP_001054865.1|/5e-85/Os05g0196200 [Oryza sativa (japonica cultivar-group)]
Unigene19127_Taxus	37	276	11.73	82.23	2.80946	9.10382e-14	1.41646e-12	-	-	-	gi|15724220|gb|AAL06503.1|AF412050_1/3e-75/At2g01180/F10A8.6 [Arabidopsis thaliana] >gi|23505931|gb|AAN28825.1| At2g01180/F10A8.6 [Arabidopsis thaliana]
Unigene9198_Taxus	9	67	2.85	19.96	2.80808	2.19842e-06	1.31691e-05	-	-	-	gi|115434238|ref|NP_001041877.1|/4e-08/Os01g0121600 [Oryza sativa (japonica cultivar-group)]
Unigene23947_Taxus	20	149	6.34	44.39	2.80768	1.69797e-09	1.60304e-08	-	-	-	-
Unigene31210_Taxus	127	946	40.27	281.84	2.8071	4.86278e-14	7.8612e-13	-	-	-	gi|115455191|ref|NP_001051196.1|/5e-25/Os03g0736700 [Oryza sativa (japonica cultivar-group)] >gi|108710958|gb|ABF98753.1| GRAM domain containing protein, expressed [Oryza sativa (japonica cultivar-group)] >gi|113549667|dbj|BAF13110.1| Os03g0736700 [Oryza sativa Japonica Group]
Unigene30906_Taxus	27	200	8.56	59.59	2.79939	1.59042e-11	1.88261e-10	-	-	-	-
Unigene10321_Taxus	8	59	2.54	17.58	2.79103	4.0675e-06	2.33675e-05	-	-	-	gi|148910082|gb|ABR18123.1|/1e-10/unknown [Picea sitchensis]
Unigene19721_Taxus	14	103	4.44	30.69	2.78914	9.01042e-08	6.87455e-07	-	-	-	-
Unigene17289_Taxus	3	22	0.95	6.55	2.7855	0.000230366	0.000932085	-	-	-	-
Unigene583_Taxus	3	22	0.95	6.55	2.7855	0.000230366	0.000931873	-	-	-	-
Unigene19235_Taxus	85	621	26.95	185.01	2.77925	0	0	-	-	-	gi|115458670|ref|NP_001052935.1|/3e-06/Os04g0450000 [Oryza sativa (japonica cultivar-group)] >gi|21740708|emb|CAD40829.1| OSJNBa0086B14.1 [Oryza sativa (japonica cultivar-group)] >gi|113564506|dbj|BAF14849.1| Os04g0450000 [Oryza sativa Japonica Group] >gi|116310077|emb|CAH67098.1| H0818E04.15 [Oryza sativa (indica cultivar-group)]
Unigene6813_Taxus	18	130	5.71	38.73	2.76189	6.44302e-09	5.66827e-08	-	-	-	gi|223992609|ref|XP_002285988.1|/1e-07/cytochrome c biogenesis protein precursor [Thalassiosira pseudonana CCMP1335] >gi|220977303|gb|EED95629.1| cytochrome c biogenesis protein precursor [Thalassiosira pseudonana CCMP1335]
Unigene24038_Taxus	36	259	11.42	77.16	2.75629	1.21902e-13	1.8373e-12	-	-	-	-
Unigene377_Taxus	12	86	3.81	25.62	2.74941	3.2937e-07	2.29387e-06	-	-	-	-
Unigene20892_Taxus	13	92	4.12	27.41	2.73399	1.7269e-07	1.26137e-06	-	-	-	gi|3252854|gb|AAC39483.1|/0.0/glutamate decarboxylase isozyme 2 [Nicotiana tabacum]
Unigene17303_Taxus	19	134	6.03	39.92	2.72688	3.31036e-09	3.02121e-08	-	-	-	gi|115474549|ref|NP_001060871.1|/3e-26/Os08g0119300 [Oryza sativa (japonica cultivar-group)] >gi|113622840|dbj|BAF22785.1| Os08g0119300 [Oryza sativa Japonica Group]
Unigene31967_Taxus	9	63	2.85	18.77	2.71939	2.19854e-06	1.31654e-05	-	-	-	gi|148907760|gb|ABR17006.1|/2e-15/unknown [Picea sitchensis]
Unigene12350_Taxus	6	42	1.9	12.51	2.71901	1.35536e-05	7.11217e-05	-	-	-	gi|25082946|gb|AAN72020.1|/4e-06/Unknown protein [Arabidopsis thaliana] >gi|31711852|gb|AAP68282.1| At1g73060 [Arabidopsis thaliana]
Unigene18439_Taxus	13	91	4.12	27.11	2.71811	1.7269e-07	1.26085e-06	-	-	-	gi|115464841|ref|NP_001056020.1|/1e-143/Os05g0512200 [Oryza sativa (japonica cultivar-group)] >gi|113579571|dbj|BAF17934.1| Os05g0512200 [Oryza sativa Japonica Group]
Unigene36072_Taxus	17	119	5.39	35.45	2.71743	1.25136e-08	1.06818e-07	-	-	-	gi|58265174|ref|XP_569743.1|/5e-33/Quinone oxidoreductase [Cryptococcus neoformans var. neoformans JEC21]
Unigene31283_Taxus	52	364	16.49	108.45	2.71737	9.54792e-15	1.65142e-13	-	-	-	-
Unigene36008_Taxus	14	98	4.44	29.2	2.71734	9.01042e-08	6.89818e-07	-	-	-	gi|20499|emb|CAA44874.1|/3e-33/legumin-like storage protein [Picea glauca]
Unigene5240_Taxus	8	56	2.54	16.68	2.71522	4.06864e-06	2.33665e-05	-	-	-	gi|115440115|ref|NP_001044337.1|/3e-07/Os01g0763800 [Oryza sativa (japonica cultivar-group)]
Unigene15574_Taxus	174	1206	55.18	359.3	2.70297	3.13082e-14	5.20294e-13	-	-	-	gi|216373865|gb|ACJ72632.1|/3e-20/hypothetical protein [Taxodium distichum var. imbricatum]
Unigene1793_Taxus	25	173	7.93	51.54	2.7003	5.98666e-11	6.65745e-10	GO:0005840//ribosome;GO:0009507//chloroplast	GO:0003735//structural constituent of ribosome;GO:0019843//rRNA binding	GO:0006412//translation	gi|75261123|sp|Q6JJ61.1|RK9_IPOTF/6e-06/RecName: Full=50S ribosomal protein L9, chloroplastic; AltName: Full=CL9; Flags: Precursor
Unigene28694_Taxus	44	304	13.95	90.57	2.69877	4.70734e-14	7.6446e-13	-	-	-	-
Unigene19820_Taxus	10	69	3.17	20.56	2.69729	1.17662e-06	7.43576e-06	-	-	-	gi|108708573|gb|ABF96368.1|/2e-26/Zinc finger, C3HC4 type family protein [Oryza sativa (japonica cultivar-group)]
Unigene5742_Taxus	28	193	8.88	57.5	2.69493	8.2645e-12	9.98184e-11	-	-	-	gi|73620927|sp|Q6IWY1.1|LPAT2_BRAOL/1e-14/RecName: Full=1-acyl-sn-glycerol-3-phosphate acyltransferase 2; AltName: Full=Lysophosphatidyl acyltransferase 2 >gi|47607472|gb|AAT36638.1| acyl-CoA:1-acylglycerol-3-phosphate acyltransferase [Brassica oleracea]
Unigene26163_Taxus	21	144	6.66	42.9	2.68738	8.6986e-10	8.53805e-09	-	-	-	-
Unigene30994_Taxus	6	41	1.9	12.21	2.68399	1.36805e-05	7.1745e-05	-	-	-	gi|115456725|ref|NP_001051963.1|/3e-07/Os03g0858700 [Oryza sativa (japonica cultivar-group)] >gi|108712209|gb|ABG00004.1| expressed protein [Oryza sativa (japonica cultivar-group)] >gi|113550434|dbj|BAF13877.1| Os03g0858700 [Oryza sativa Japonica Group]
Unigene6641_Taxus	29	196	9.2	58.39	2.66602	4.38006e-12	5.472e-11	-	-	-	-
Unigene21757_Taxus	4	27	1.27	8.04	2.66237	8.10106e-05	0.000360351	-	-	-	-
Unigene16290_Taxus	6	40	1.9	11.92	2.64931	1.38957e-05	7.2831e-05	GO:0009523//photosystem II;GO:0009579//thylakoid;GO:0009536//plastid	GO:0046872//metal ion binding;GO:0043169//cation binding	GO:0015979//photosynthesis	gi|15240013|ref|NP_201458.1|/9e-10/PSBO1 (PS II OXYGEN-EVOLVING COMPLEX 1); oxygen evolving/ poly(U) binding [Arabidopsis thaliana] >gi|19883896|sp|P23321.2|PSBO1_ARATH RecName: Full=Oxygen-evolving enhancer protein 1-1, chloroplastic; Short=OEE1; AltName: Full=33 kDa subunit of oxygen evolving system of photosystem II; AltName: Full=OEC 33 kDa subunit; AltName: Full=33 kDa thylakoid membrane pro…
Unigene27595_Taxus	52	347	16.49	103.38	2.64829	9.54792e-15	1.64822e-13	-	-	-	-
Unigene15137_Taxus	12	80	3.81	23.83	2.64492	3.2937e-07	2.30017e-06	-	-	-	gi|2827704|emb|CAA16677.1|/2e-10/LRR-like protein [Arabidopsis thaliana]
Unigene18515_Taxus	8	53	2.54	15.79	2.63611	4.07426e-06	2.33912e-05	-	-	-	gi|15228789|ref|NP_191158.1|/6e-42/ESK1 (ESKIMO 1) [Arabidopsis thaliana]
Unigene20587_Taxus	17	112	5.39	33.37	2.63019	1.25136e-08	1.07023e-07	-	-	-	gi|20197599|gb|AAM15147.1|/5e-19/Expressed protein [Arabidopsis thaliana]
Unigene20806_Taxus	6	39	1.9	11.62	2.61254	1.426e-05	7.45645e-05	-	-	-	gi|79403782|ref|NP_188249.3|/2e-27/DNA binding / transcription factor [Arabidopsis thaliana] >gi|2062174|gb|AAB63648.1| transcription factor (TINY) isolog [Arabidopsis thaliana] >gi|62736896|gb|AAX97731.1| AP2/EREBP transcription factor family protein [Arabidopsis thaliana]
Unigene6453_Taxus	6	39	1.9	11.62	2.61254	1.426e-05	7.45426e-05	-	-	-	gi|115452299|ref|NP_001049750.1|/3e-45/Os03g0283000 [Oryza sativa (japonica cultivar-group)] >gi|113548221|dbj|BAF11664.1| Os03g0283000 [Oryza sativa Japonica Group]
Unigene2507_Taxus	14	91	4.44	27.11	2.61019	9.01042e-08	6.89226e-07	-	-	-	gi|2352919|gb|AAB69317.1|/1e-159/plastidic glucose-6-phosphate dehydrogenase [Petroselinum crispum]
Unigene20332_Taxus	4	26	1.27	7.75	2.60937	0.000109665	0.000473848	-	-	-	-
Unigene5092_Taxus	4	26	1.27	7.75	2.60937	0.000109665	0.000473733	GO:0016023//cytoplasmic membrane-bounded vesicle	-	-	gi|208081617|gb|ACD65509.2|/1e-142/beta-glucosidase D4 [Lotus japonicus]
Unigene6012_Taxus	13	84	4.12	25.03	2.60294	1.7269e-07	1.26034e-06	-	-	-	-
Unigene35232_Taxus	69	446	21.88	132.88	2.60244	0	0	-	-	-	gi|124110780|gb|ABM91752.1|/1e-82/acidic thaumatin-like protein 5 precursor [Taxus x media]
Unigene30268_Taxus	53	342	16.81	101.89	2.59962	0	0	-	-	-	-
Unigene26065_Taxus	38	245	12.05	72.99	2.59867	8.21566e-14	1.28163e-12	-	-	-	-
Unigene17277_Taxus	18	116	5.71	34.56	2.59754	6.44302e-09	5.67107e-08	-	-	-	-
Unigene33141_Taxus	7	45	2.22	13.41	2.59468	7.56614e-06	4.15636e-05	-	-	-	-
Unigene33538_Taxus	41	262	13	78.06	2.58607	1.06137e-13	1.61472e-12	-	-	-	-
Unigene28237_Taxus	52	332	16.49	98.91	2.58452	9.54792e-15	1.64503e-13	-	-	-	gi|4099828|gb|AAD00692.1|/3e-20/homeobox transcription factor SKN2 [Picea mariana]
Unigene27997_Taxus	57	361	18.08	107.55	2.57254	6.88338e-15	1.20341e-13	-	-	-	-
Unigene32326_Taxus	12	76	3.81	22.64	2.57101	3.29376e-07	2.29212e-06	-	-	-	gi|115475587|ref|NP_001061390.1|/2e-28/Os08g0260600 [Oryza sativa (japonica cultivar-group)] >gi|113623359|dbj|BAF23304.1| Os08g0260600 [Oryza sativa Japonica Group]
Unigene13012_Taxus	31	196	9.83	58.39	2.57046	1.28808e-12	1.7112e-11	-	-	-	gi|116060978|emb|CAL56366.1|/2e-06/COG1357: Uncharacterized low-complexity proteins (ISS) [Ostreococcus tauri]
Unigene19290_Taxus	78	493	24.73	146.88	2.5703	0	0	-	-	-	gi|15241268|ref|NP_200470.1|/8e-89/glycosyl hydrolase family 17 protein [Arabidopsis thaliana] >gi|75171106|sp|Q9FJU9.1|E1313_ARATH RecName: Full=Glucan endo-1,3-beta-glucosidase 13; AltName: Full=(1->3)-beta-glucan endohydrolase 13; Short=(1->3)-beta-glucanase 13; AltName: Full=Beta-1,3-endoglucanase 13; Short=Beta-1,3-glucanase 13; Flags: Precursor >gi|10176762|dbj|BAB09876.1| beta-1,3-glucanas…
Unigene19908_Taxus	13	82	4.12	24.43	2.56794	1.72691e-07	1.25983e-06	-	-	-	gi|259149177|emb|CAY82419.1|/3e-08/Npr1p [Saccharomyces cerevisiae EC1118]
Unigene18807_Taxus	7	44	2.22	13.11	2.56204	7.65796e-06	4.20421e-05	-	-	-	gi|159487004|ref|XP_001701526.1|/1e-33/glyoxal or galactose oxidase [Chlamydomonas reinhardtii] >gi|158271587|gb|EDO97403.1| glyoxal or galactose oxidase [Chlamydomonas reinhardtii]
Unigene32238_Taxus	7	44	2.22	13.11	2.56204	7.65796e-06	4.20291e-05	-	-	-	-
Unigene35031_Taxus	4	25	1.27	7.45	2.55241	0.000158069	0.000662587	-	-	-	gi|159477050|ref|XP_001696624.1|/2e-11/thylakoid lumenal protein [Chlamydomonas reinhardtii] >gi|158282849|gb|EDP08601.1| thylakoid lumenal protein [Chlamydomonas reinhardtii]
Unigene30980_Taxus	4	25	1.27	7.45	2.55241	0.000158069	0.000662431	-	-	-	-
Unigene2817_Taxus	4	25	1.27	7.45	2.55241	0.000158069	0.000662276	-	-	-	gi|255677875|dbj|BAH93980.1|/2e-13/Os07g0553633 [Oryza sativa Japonica Group]
Unigene17866_Taxus	20	124	6.34	36.94	2.54263	1.69797e-09	1.60134e-08	-	-	-	gi|226277579|gb|EEH33145.1|/3e-23/PQ loop repeat protein [Paracoccidioides brasiliensis Pb01]
Unigene7410_Taxus	5	31	1.59	9.24	2.53887	4.06976e-05	0.000193186	-	-	-	gi|108711872|gb|ABF99667.1|/4e-76/DEAD/DEAH box helicase family protein, expressed [Oryza sativa (japonica cultivar-group)]
Unigene36177_Taxus	6	37	1.9	11.02	2.53605	1.59067e-05	8.27141e-05	-	-	-	gi|115455231|ref|NP_001051216.1|/7e-25/Os03g0739700 [Oryza sativa (japonica cultivar-group)] >gi|108710985|gb|ABF98780.1| expressed protein [Oryza sativa (japonica cultivar-group)] >gi|113549687|dbj|BAF13130.1| Os03g0739700 [Oryza sativa Japonica Group]
Unigene33645_Taxus	14	86	4.44	25.62	2.52864	9.01048e-08	6.87165e-07	-	-	-	gi|116793257|gb|ABK26675.1|/1e-17/unknown [Picea sitchensis]
Unigene7202_Taxus	7	43	2.22	12.81	2.52864	7.81206e-06	4.27826e-05	-	-	-	gi|115465587|ref|NP_001056393.1|/2e-63/Os05g0574800 [Oryza sativa (japonica cultivar-group)]
Unigene34636_Taxus	41	250	13	74.48	2.51834	1.06137e-13	1.61748e-12	-	-	-	gi|7592844|dbj|BAA94422.1|/7e-44/COP1 [Oryza sativa Japonica Group]
Unigene29930_Taxus	14	85	4.44	25.32	2.51165	9.0105e-08	6.86872e-07	-	-	-	gi|115449355|ref|NP_001048446.1|/3e-06/Os02g0806000 [Oryza sativa (japonica cultivar-group)] >gi|47497343|dbj|BAD19383.1| GCN5-related N-acetyltransferase (GNAT) family protein-like [Oryza sativa Japonica Group] >gi|47497393|dbj|BAD19431.1| GCN5-related N-acetyltransferase (GNAT) family protein-like [Oryza sativa Japonica Group] >gi|113537977|dbj|BAF10360.1| Os02g0806000 [Oryza sativa Japonica Gr…
Unigene24874_Taxus	16	97	5.07	28.9	2.51101	2.42416e-08	1.98285e-07	-	-	-	-
Unigene9390_Taxus	6	36	1.9	10.73	2.49758	1.76362e-05	9.10695e-05	-	-	-	gi|159463206|ref|XP_001689833.1|/6e-08/plastid lipid associated protein [Chlamydomonas reinhardtii] >gi|158283821|gb|EDP09571.1| plastid lipid associated protein [Chlamydomonas reinhardtii]
Unigene32347_Taxus	105	631	33.3	187.99	2.49706	0	0	-	-	-	-
Unigene4852_Taxus	168	1007	53.27	300.01	2.49362	5.59552e-14	8.98056e-13	-	GO:0003700//sequence-specific DNA binding transcription factor activity	GO:0045449//regulation of transcription	gi|73811199|gb|AAZ86536.1|/5e-10/truncated COL1 [Lolium perenne]
Unigene15788_Taxus	4	24	1.27	7.15	2.49311	0.000239432	0.000965696	-	-	-	-
Unigene4358_Taxus	4	24	1.27	7.15	2.49311	0.000239432	0.000965478	-	-	-	gi|20161610|dbj|BAB90530.1|/6e-31/B1065G12.12 [Oryza sativa Japonica Group]
Unigene17449_Taxus	4	24	1.27	7.15	2.49311	0.000239432	0.000965259	-	-	-	gi|194476839|ref|YP_002049018.1|/7e-19/alanyl-tRNA synthetase [Paulinella chromatophora] >gi|171191846|gb|ACB42808.1| alanyl-tRNA synthetase [Paulinella chromatophora]
Unigene9687_Taxus	5	30	1.59	8.94	2.49125	5.245e-05	0.000244927	-	-	-	gi|19352041|dbj|BAB85914.1|/1e-168/auxin response factor 6a [Oryza sativa]
Unigene4274_Taxus	5	30	1.59	8.94	2.49125	5.245e-05	0.000244863	-	-	-	gi|18415709|ref|NP_567629.1|/3e-06/F-box family protein [Arabidopsis thaliana] >gi|142989915|sp|O65416.2|SKI27_ARATH RecName: Full=F-box protein SKIP27; AltName: Full=SKP1-interacting partner 27 >gi|117168229|gb|ABK32197.1| At4g21510 [Arabidopsis thaliana]
Unigene20209_Taxus	63	376	19.98	112.02	2.48713	0	0	-	-	-	gi|115444097|ref|NP_001045828.1|/6e-06/Os02g0137200 [Oryza sativa (japonica cultivar-group)] >gi|113535359|dbj|BAF07742.1| Os02g0137200 [Oryza sativa Japonica Group]
Unigene31181_Taxus	53	315	16.81	93.85	2.48104	0	0	-	-	-	-
Unigene13186_Taxus	17	101	5.39	30.09	2.48093	1.25136e-08	1.06972e-07	-	-	-	gi|82097|pir||S00629/5e-08/pectinesterase (EC 3.1.1.11) precursor (clone PE1) - tomato
Unigene21107_Taxus	104	616	32.98	183.52	2.47627	0	0	-	-	-	gi|270258534|emb|CBI40568.1|/2e-08/unnamed protein product [Vitis vinifera]
Unigene33489_Taxus	32	189	10.15	56.31	2.47191	7.41852e-13	1.01584e-11	-	-	-	gi|18417885|ref|NP_568327.1|/9e-48/hydrolase, alpha/beta fold family protein [Arabidopsis thaliana]
Unigene19768_Taxus	10	59	3.17	17.58	2.47138	1.18032e-06	7.45654e-06	-	-	-	gi|115448243|ref|NP_001047901.1|/9e-46/Os02g0711200 [Oryza sativa (japonica cultivar-group)] >gi|113537432|dbj|BAF09815.1| Os02g0711200 [Oryza sativa Japonica Group]
Unigene24155_Taxus	9	53	2.85	15.79	2.46998	2.2228e-06	1.33017e-05	-	-	-	gi|108711913|gb|ABF99708.1|/3e-06/expressed protein [Oryza sativa (japonica cultivar-group)]
Unigene20198_Taxus	24	141	7.61	42.01	2.46476	1.16749e-10	1.25597e-09	-	-	-	gi|6321459|ref|NP_011537.1|/4e-06/Mtl1p [Saccharomyces cerevisiae] >gi|1723652|sp|P53214.1|MTL1_YEAST RecName: Full=Protein MTL1; AltName: Full=MID two-like protein 1; Flags: Precursor >gi|285812218|tpg|DAA08118.1| TPA: Mtl1p [Saccharomyces cerevisiae]
Unigene3184_Taxus	38	222	12.05	66.14	2.45649	8.21566e-14	1.28388e-12	-	-	-	-
Unigene22040_Taxus	125	730	39.64	217.49	2.45592	0	0	-	-	-	-
Unigene9544_Taxus	10	58	3.17	17.28	2.44655	1.18281e-06	7.46962e-06	-	-	-	gi|15228362|ref|NP_190407.1|/6e-06/octicosapeptide/Phox/Bem1p (PB1) domain-containing protein [Arabidopsis thaliana] >gi|48310282|gb|AAT41790.1| At3g48240 [Arabidopsis thaliana] >gi|52218812|gb|AAU29476.1| At3g48240 [Arabidopsis thaliana]
Unigene14617_Taxus	10	58	3.17	17.28	2.44655	1.18281e-06	7.46697e-06	-	-	GO:0008152//metabolic process	gi|5689102|dbj|BAA82810.1|/6e-06/basic endochitinase [Arabidopsis thaliana]
Unigene25611_Taxus	9	52	2.85	15.49	2.4423	2.23912e-06	1.33949e-05	-	-	-	gi|38605337|sp|Q8L7H3.1|XTH29_ARATH/2e-17/RecName: Full=Probable xyloglucan endotransglucosylase/hydrolase protein 29; Short=At-XTH29; Short=XTH-29; Flags: Precursor
Unigene21500_Taxus	5	29	1.59	8.64	2.442	7.20782e-05	0.000326238	-	-	-	gi|6635838|gb|AAF20002.1|AF213936_1/1e-139/amino acid/peptide transporter [Prunus dulcis]
Unigene33786_Taxus	31	179	9.83	53.33	2.43968	1.28808e-12	1.70865e-11	-	-	-	gi|1350821|sp|P49314.1|ROC2_NICPL/1e-14/RecName: Full=31 kDa ribonucleoprotein, chloroplastic; AltName: Full=CP-RBP31; Flags: Precursor >gi|19710|emb|CAA46233.1| RNA binding protein 31 [Nicotiana plumbaginifolia]
Unigene36244_Taxus	37	213	11.73	63.46	2.43564	9.10382e-14	1.41399e-12	-	-	-	gi|144905184|dbj|BAF56241.1|/1e-110/cytochrome P450 enzyme [Pisum sativum]
Unigene15487_Taxus	32	184	10.15	54.82	2.43322	7.41852e-13	1.0135e-11	-	-	-	gi|63108922|gb|AAY33633.1|/1e-103/RVDE1 [Oryza meridionalis] >gi|63108946|gb|AAY33645.1| RVDE1 [Oryza sativa Indica Group] >gi|63108950|gb|AAY33647.1| RVDE1 [Oryza sativa Indica Group] >gi|63108958|gb|AAY33651.1| RVDE1 [Oryza sativa Indica Group] >gi|86991274|gb|ABD16098.1| RVDE1 [Oryza meridionalis] >gi|86991286|gb|ABD16104.1| RVDE1 [Oryza nivara] >gi|86991288|gb|ABD16105.1| RVDE1 [Oryza nivara]…
Unigene64_Taxus	11	63	3.49	18.77	2.42713	6.26218e-07	4.17205e-06	-	-	-	-
Unigene31444_Taxus	121	683	38.37	203.48	2.40684	0	0	-	-	-	-
Unigene12402_Taxus	64	360	20.29	107.25	2.40214	0	0	GO:0009536//plastid	GO:0034256//chlorophyll(ide) b reductase activity	GO:0015996//chlorophyll catabolic process;GO:0010304//PSII associated light-harvesting complex II catabolic process	gi|239611967|gb|EEQ88954.1|/3e-15/oxidoreductase [Ajellomyces dermatitidis ER-3]
Unigene18646_Taxus	13	73	4.12	21.75	2.4003	1.72794e-07	1.26006e-06	-	-	-	gi|116786404|gb|ABK24093.1|/1e-24/unknown [Picea sitchensis]
Unigene28806_Taxus	7	39	2.22	11.62	2.38798	1.03997e-05	5.55033e-05	-	-	-	gi|15227199|ref|NP_179827.1|/3e-07/pentatricopeptide (PPR) repeat-containing protein [Arabidopsis thaliana] >gi|75206347|sp|Q9SJZ3.1|PP169_ARATH RecName: Full=Pentatricopeptide repeat-containing protein At2g22410, mitochondrial; Flags: Precursor >gi|18086349|gb|AAL57637.1| At2g22410/F14M13.19 [Arabidopsis thaliana]
Unigene7723_Taxus	7	39	2.22	11.62	2.38798	1.03997e-05	5.54867e-05	-	-	-	-
Unigene361_Taxus	7	39	2.22	11.62	2.38798	1.03997e-05	5.547e-05	-	-	-	-
Unigene20802_Taxus	37	206	11.73	61.37	2.38733	9.10382e-14	1.41522e-12	-	-	-	gi|115480305|ref|NP_001063746.1|/2e-06/Os09g0530000 [Oryza sativa (japonica cultivar-group)] >gi|113631979|dbj|BAF25660.1| Os09g0530000 [Oryza sativa Japonica Group]
Unigene35424_Taxus	81	451	25.69	134.36	2.38682	1.17684e-14	2.01203e-13	-	-	-	gi|79546640|ref|NP_201135.2|/1e-07/structural constituent of ribosome [Arabidopsis thaliana] >gi|63147388|gb|AAY34167.1| At5g63300 [Arabidopsis thaliana]
Unigene18349_Taxus	9	50	2.85	14.9	2.38628	2.3109e-06	1.38057e-05	-	-	-	gi|115455103|ref|NP_001051152.1|/2e-45/Os03g0729100 [Oryza sativa (japonica cultivar-group)] >gi|113549623|dbj|BAF13066.1| Os03g0729100 [Oryza sativa Japonica Group]
Unigene6738_Taxus	51	283	16.17	84.31	2.38238	0	0	-	-	-	gi|168047373|ref|XP_001776145.1|/2e-22/predicted protein [Physcomitrella patens subsp. patens] >gi|162672520|gb|EDQ59056.1| predicted protein [Physcomitrella patens subsp. patens]
Unigene15039_Taxus	24	133	7.61	39.62	2.38026	1.16749e-10	1.25446e-09	-	-	-	gi|108708531|gb|ABF96326.1|/4e-06/expressed protein [Oryza sativa (japonica cultivar-group)]
Unigene28720_Taxus	25	138	7.93	41.11	2.3741	5.98666e-11	6.66161e-10	-	-	-	-
Unigene30996_Taxus	68	374	21.56	111.42	2.36958	0	0	-	-	-	gi|116055532|emb|CAL58200.1|/6e-06/Histone deacetylase superfamily (ISS) [Ostreococcus tauri]
Unigene35932_Taxus	30	164	9.51	48.86	2.36114	2.33724e-12	3.00418e-11	-	-	-	gi|116000245|emb|CAL49925.1|/2e-08/Predicted haloacid-halidohydrolase and related hydrolases (ISS) [Ostreococcus tauri]
Unigene33488_Taxus	14	76	4.44	22.64	2.35024	9.01768e-08	6.87126e-07	-	-	-	gi|224113661|ref|XP_002316535.1|/7e-39/arogenate/prephenate dehydratase [Populus trichocarpa] >gi|222859600|gb|EEE97147.1| arogenate/prephenate dehydratase [Populus trichocarpa]
Unigene18501_Taxus	14	76	4.44	22.64	2.35024	9.01768e-08	6.86832e-07	-	-	-	gi|168828715|gb|ACA33844.1|/2e-18/R2R3-Myb8 transcription factor [Pinus pinaster]
Unigene20146_Taxus	14	76	4.44	22.64	2.35024	9.01768e-08	6.86538e-07	-	-	-	gi|62122633|dbj|BAD93290.1|/1e-103/beta-amylase [Glycine max]
Unigene27738_Taxus	74	401	23.47	119.47	2.34776	0	0	-	-	-	-
Unigene31900_Taxus	12	65	3.81	19.37	2.34596	3.31204e-07	2.30304e-06	-	-	-	gi|15228208|ref|NP_190349.1|/3e-27/bundle-sheath defective protein 2 family / bsd2 family [Arabidopsis thaliana]
Unigene7595_Taxus	32	173	10.15	51.54	2.34421	7.41852e-13	1.01195e-11	-	-	-	gi|255676398|dbj|BAH93172.1|/6e-07/Os05g0434200 [Oryza sativa Japonica Group]
Unigene20947_Taxus	10	53	3.17	15.79	2.31646	1.254e-06	7.89676e-06	-	-	-	gi|115460436|ref|NP_001053818.1|/3e-62/Os04g0608900 [Oryza sativa (japonica cultivar-group)] >gi|27085280|gb|AAN84503.1| serine/threonine protein kinase [Oryza sativa Japonica Group] >gi|38567896|emb|CAE03651.2| OSJNBa0060N03.16 [Oryza sativa (japonica cultivar-group)] >gi|90265072|emb|CAH67745.1| H0702G05.4 [Oryza sativa (indica cultivar-group)] >gi|113565389|dbj|BAF15732.1| Os04g0608900 [Oryza …
Unigene20457_Taxus	44	233	13.95	69.42	2.31509	4.70734e-14	7.66556e-13	-	-	-	-
Unigene14011_Taxus	14	74	4.44	22.05	2.31215	9.03004e-08	6.87186e-07	-	-	-	gi|115469386|ref|NP_001058292.1|/1e-27/Os06g0663500 [Oryza sativa (japonica cultivar-group)] >gi|75114661|sp|Q653Z5.1|SPL11_ORYSJ RecName: Full=Squamosa promoter-binding-like protein 11
Unigene31764_Taxus	71	374	22.51	111.42	2.30737	0	0	-	-	-	gi|148908428|gb|ABR17327.1|/1e-08/unknown [Picea sitchensis]
Unigene13309_Taxus	19	100	6.03	29.79	2.3046	3.3105e-09	3.01825e-08	-	-	-	gi|58261188|ref|XP_568004.1|/3e-44/ccr4-not transcription complex, subunit 7 [Cryptococcus neoformans var. neoformans JEC21]
Unigene5376_Taxus	8	42	2.54	12.51	2.30018	6.09012e-06	3.40752e-05	-	-	-	gi|115434086|ref|NP_001041801.1|/3e-15/Os01g0111100 [Oryza sativa (japonica cultivar-group)]
Unigene19390_Taxus	14	73	4.44	21.75	2.29238	9.04256e-08	6.87845e-07	-	-	-	gi|227206112|dbj|BAH57111.1|/1e-102/AT5G39590 [Arabidopsis thaliana]
Unigene18091_Taxus	10	52	3.17	15.49	2.28878	1.30379e-06	8.19871e-06	-	-	-	gi|253762018|gb|ACT35473.1|/1e-100/peroxidase 52 [Brassica rapa]
Unigene2946_Taxus	60	312	19.03	92.95	2.28818	0	0	-	-	-	gi|115439625|ref|NP_001044092.1|/2e-70/Os01g0720700 [Oryza sativa (japonica cultivar-group)] >gi|75248562|sp|Q8W0E4.1|SAT1_ORYSJ RecName: Full=Probable serine acetyltransferase 1; AltName: Full=OsSERAT1;1 >gi|113533623|dbj|BAF06006.1| Os01g0720700 [Oryza sativa Japonica Group]
Unigene29531_Taxus	151	783	47.88	233.28	2.28457	0	0	-	-	-	-
Unigene35722_Taxus	38	197	12.05	58.69	2.28408	8.21566e-14	1.28275e-12	-	-	-	gi|194239628|dbj|BAG55223.1|/1e-21/chlorophyllase [Sesbania rostrata]
Unigene18460_Taxus	11	57	3.49	16.98	2.28254	6.56734e-07	4.35906e-06	-	-	-	gi|255670585|dbj|BAF07746.2|/6e-08/Os02g0137700 [Oryza sativa Japonica Group]
Unigene27003_Taxus	309	1600	97.99	476.68	2.28231	4.93384e-13	6.87227e-12	-	-	-	gi|226508338|ref|NP_001148977.1|/5e-06/alpha-N-arabinofuranosidase A [Zea mays] >gi|195623744|gb|ACG33702.1| alpha-N-arabinofuranosidase A precursor [Zea mays]
Unigene16958_Taxus	17	88	5.39	26.22	2.28231	1.2519e-08	1.06711e-07	-	-	-	-
Unigene8959_Taxus	6	31	1.9	9.24	2.28189	6.78576e-05	0.000309811	-	-	-	gi|92091607|gb|AAQ63646.3|/1e-120/glycerol-3-phosphate acyltransferase [Solanum lycopersicum]
Unigene26172_Taxus	7	36	2.22	10.73	2.27302	2.08364e-05	0.000105815	-	-	-	-
Unigene28679_Taxus	7	36	2.22	10.73	2.27302	2.08364e-05	0.000105785	-	-	-	-
Unigene10270_Taxus	23	118	7.29	35.16	2.26994	2.27912e-10	2.37859e-09	-	-	-	gi|129282606|gb|ABO30294.1|/5e-65/nodulin-related protein [Triticum turgidum subsp. dicoccon]
Unigene23285_Taxus	69	353	21.88	105.17	2.26504	0	0	-	-	-	-
Unigene35139_Taxus	97	496	30.76	147.77	2.26423	3.10862e-15	5.63952e-14	-	-	-	gi|226316443|gb|ACO44685.1|/7e-98/fructose-bisphosphate aldolase [Hordeum vulgare]
Unigene28767_Taxus	30	153	9.51	45.58	2.26088	2.33724e-12	2.99985e-11	-	-	-	-
Unigene35592_Taxus	10	51	3.17	15.19	2.26057	1.38503e-06	8.6698e-06	-	-	-	gi|74272685|gb|ABA01138.1|/8e-08/chloroplast oxygen-evolving complex/thylakoid lumenal 25.6kDa protein [Chlamydomonas incerta]
Unigene16295_Taxus	33	168	10.46	50.05	2.25849	4.44756e-13	6.21925e-12	GO:0009535//chloroplast thylakoid membrane;GO:0009543//chloroplast thylakoid lumen	-	-	gi|145323868|ref|NP_001077523.1|/4e-06/thylakoid lumenal protein-related [Arabidopsis thaliana]
Unigene2028_Taxus	13	66	4.12	19.66	2.25455	1.76065e-07	1.28129e-06	-	-	-	-
Unigene19680_Taxus	12	61	3.81	18.17	2.2537	3.42666e-07	2.37996e-06	-	-	-	gi|119494807|ref|XP_001264208.1|/2e-23/GTP-binding protein Obg [Neosartorya fischeri NRRL 181] >gi|119412370|gb|EAW22311.1| GTP-binding protein Obg [Neosartorya fischeri NRRL 181]
Unigene24069_Taxus	391	1983	123.99	590.79	2.25242	3.53272e-13	4.99884e-12	-	-	-	-
Unigene13957_Taxus	16	81	5.07	24.13	2.25077	2.42976e-08	1.98652e-07	-	-	-	gi|116786296|gb|ABK24055.1|/3e-07/unknown [Picea sitchensis]
Unigene20869_Taxus	22	111	6.98	33.07	2.24422	4.45332e-10	4.51028e-09	-	-	-	-
Unigene26018_Taxus	78	392	24.73	116.79	2.23958	0	0	-	-	-	-
Unigene33731_Taxus	6	30	1.9	8.94	2.23428	0.000102964	0.000449365	-	-	-	gi|77744885|gb|ABB02396.1|/9e-70/temperature-induced lipocalin [Medicago truncatula]
Unigene12373_Taxus	20	100	6.34	29.79	2.23227	1.69837e-09	1.60087e-08	-	-	-	gi|195633101|gb|ACG36734.1|/2e-19/hydrolase, alpha/beta fold family protein [Zea mays]
Unigene17892_Taxus	7	35	2.22	10.43	2.23211	2.94252e-05	0.00014517	-	-	-	gi|158828372|gb|ABW81204.1|/7e-43/alcohol acyl transferase [Citrus sinensis]
Unigene19927_Taxus	14	70	4.44	20.85	2.23142	9.15034e-08	6.95746e-07	-	-	-	gi|18400282|ref|NP_565552.1|/1e-86/protein kinase family protein [Arabidopsis thaliana] >gi|30682087|ref|NP_850041.1| protein kinase family protein [Arabidopsis thaliana] >gi|116256124|sp|Q8RY67.2|WAKLO_ARATH RecName: Full=Wall-associated receptor kinase-like 14; Flags: Precursor
Unigene23301_Taxus	40	199	12.68	59.29	2.22523	6.9722e-14	1.10605e-12	-	-	-	-
Unigene15322_Taxus	36	179	11.42	53.33	2.22338	1.21902e-13	1.84198e-12	-	-	-	-
Unigene467_Taxus	19	94	6.03	28.01	2.21571	3.31286e-09	3.01885e-08	-	-	-	gi|258575501|ref|XP_002541932.1|/0.0/AMP deaminase 2 [Uncinocarpus reesii 1704] >gi|237902198|gb|EEP76599.1| AMP deaminase 2 [Uncinocarpus reesii 1704]
Unigene15258_Taxus	15	74	4.76	22.05	2.21175	4.73988e-08	3.75794e-07	-	-	-	-
Unigene23664_Taxus	15	74	4.76	22.05	2.21175	4.73988e-08	3.75627e-07	-	-	-	gi|30687603|ref|NP_194476.2|/4e-14/CBS domain-containing protein [Arabidopsis thaliana] >gi|111074322|gb|ABH04534.1| At4g27460 [Arabidopsis thaliana]
Unigene32227_Taxus	14	69	4.44	20.56	2.21121	9.23788e-08	7.02103e-07	-	-	-	-
Unigene3506_Taxus	12	59	3.81	17.58	2.20607	3.64662e-07	2.52584e-06	-	-	-	gi|15242003|ref|NP_201099.1|/2e-29/Dof-type zinc finger domain-containing protein [Arabidopsis thaliana] >gi|55583984|sp|Q9FM03.2|DOF56_ARATH RecName: Full=Dof zinc finger protein DOF5.6; Short=AtDOF5.6 >gi|57222122|gb|AAW38968.1| At5g62940 [Arabidopsis thaliana] >gi|58531346|gb|AAW78595.1| At5g62940 [Arabidopsis thaliana]
Unigene21488_Taxus	120	589	38.05	175.48	2.20534	0	0	-	-	-	gi|42571589|ref|NP_973885.1|/3e-75/AtUGT85A5 (UDP-glucosyl transferase 85A5); glucuronosyltransferase/ transferase, transferring glycosyl groups [Arabidopsis thaliana] >gi|9392678|gb|AAF87255.1|AC068562_2 Strong similarity to UDP-glucose glucosyltransferase from Arabidopsis thaliana gb|AB016819 and contains a UDP-glucosyl transferase PF|00201 domain. ESTs gb|U74128, gb|AA713257 come from this gene
Unigene35091_Taxus	22	108	6.98	32.18	2.20487	4.45384e-10	4.50825e-09	-	-	-	gi|226508268|ref|NP_001148751.1|/1e-07/16.9 kDa class I heat shock protein 1 [Zea mays] >gi|195621878|gb|ACG32769.1| 16.9 kDa class I heat shock protein 1 [Zea mays]
Unigene22424_Taxus	97	475	30.76	141.52	2.20188	3.10862e-15	5.64527e-14	-	-	-	-
Unigene29148_Taxus	259	1262	82.13	375.98	2.19467	0	0	-	-	-	-
Unigene3443_Taxus	7	34	2.22	10.13	2.19	4.33714e-05	0.000205277	-	-	-	-
Unigene5576_Taxus	13	63	4.12	18.77	2.18771	1.87207e-07	1.35959e-06	-	-	-	gi|15232837|ref|NP_186850.1|/1e-103/pentatricopeptide (PPR) repeat-containing protein [Arabidopsis thaliana] >gi|75193830|sp|Q9S7F4.1|PP206_ARATH RecName: Full=Putative pentatricopeptide repeat-containing protein At2g01510
Unigene24104_Taxus	78	378	24.73	112.62	2.18713	0	0	-	-	-	-
Unigene8749_Taxus	225	1090	71.35	324.74	2.1863	0	0	-	-	-	-
Unigene28813_Taxus	11	53	3.49	15.79	2.17771	8.5139e-07	5.56402e-06	-	-	-	-
Unigene35321_Taxus	15	72	4.76	21.45	2.17194	4.83402e-08	3.82917e-07	-	-	-	gi|119358846|emb|CAL52252.2|/1e-06/Cao undefined product (IC) [Ostreococcus tauri]
Unigene30979_Taxus	9	43	2.85	12.81	2.16824	5.7972e-06	3.2518e-05	-	-	-	gi|115479165|ref|NP_001063176.1|/2e-46/Os09g0416200 [Oryza sativa (japonica cultivar-group)] >gi|113631409|dbj|BAF25090.1| Os09g0416200 [Oryza sativa Japonica Group]
Unigene33553_Taxus	9	43	2.85	12.81	2.16824	5.7972e-06	3.25077e-05	GO:0045261//proton-transporting ATP synthase complex, catalytic core F(1);GO:0009941//chloroplast envelope;GO:0009535//chloroplast thylakoid membrane	GO:0046933//hydrogen ion transporting ATP synthase activity, rotational mechanism;GO:0046961//proton-transporting ATPase activity, rotational mechanism	GO:0015986//ATP synthesis coupled proton transport	gi|219119491|ref|XP_002180505.1|/1e-46/precursor of ATPase ATPase gamma subunit [Phaeodactylum tricornutum CCAP 1055/1] >gi|217407978|gb|EEC47913.1| precursor of ATPase ATPase gamma subunit [Phaeodactylum tricornutum CCAP 1055/1]
Unigene9197_Taxus	178	851	56.44	253.54	2.16742	0	0	-	-	-	-
Unigene36061_Taxus	26	124	8.24	36.94	2.16447	3.08134e-11	3.55072e-10	-	-	-	gi|18418200|ref|NP_568342.1|/4e-07/ENH1 (enhancer of sos3-1); electron carrier/ metal ion binding / protein binding [Arabidopsis thaliana]
Unigene26471_Taxus	22	105	6.98	31.28	2.16394	4.45604e-10	4.50791e-09	-	-	-	-
Unigene20641_Taxus	40	190	12.68	56.61	2.1585	6.9722e-14	1.10704e-12	-	-	-	gi|227206254|dbj|BAH57182.1|/1e-09/AT3G03150 [Arabidopsis thaliana]
Unigene20045_Taxus	8	38	2.54	11.32	2.15597	1.85215e-05	9.46258e-05	-	-	-	-
Unigene18742_Taxus	8	38	2.54	11.32	2.15597	1.85215e-05	9.45987e-05	-	-	-	-
Unigene30111_Taxus	39	185	12.37	55.12	2.15573	7.74936e-14	1.21849e-12	-	-	-	gi|115488120|ref|NP_001066547.1|/7e-18/Os12g0270200 [Oryza sativa (japonica cultivar-group)]
Unigene4917_Taxus	23	109	7.29	32.47	2.15512	2.2803e-10	2.37843e-09	-	GO:0003824//catalytic activity	GO:0008610//lipid biosynthetic process	gi|115467092|ref|NP_001057145.1|/6e-44/Os06g0216300 [Oryza sativa (japonica cultivar-group)] >gi|60687503|pir||JC8028 cis-12-oxo-phytodienoic acid-reductase 1 - rice >gi|23495288|dbj|BAC20139.1| 12-oxophytodienoic acid reductase [Oryza sativa] >gi|30140333|emb|CAD89604.1| oxo-phytodienoic acid reductase [Oryza sativa (japonica cultivar-group)] >gi|49532745|dbj|BAD26703.1| 12-oxo-phytodienoic acid…
Unigene324_Taxus	49	232	15.54	69.12	2.15312	3.9968e-15	7.17772e-14	-	-	-	gi|195641654|gb|ACG40295.1|/4e-21/acid phosphatase/vanadium-dependent haloperoxidase related [Zea mays]
Unigene8397_Taxus	11	52	3.49	15.49	2.15004	9.91718e-07	6.4152e-06	-	-	-	-
Unigene33456_Taxus	71	335	22.51	99.81	2.14862	0	0	GO:0009535//chloroplast thylakoid membrane	-	-	gi|28207763|gb|AAO32624.1|/5e-19/CR084 protein [Chlamydomonas reinhardtii]
Unigene35671_Taxus	106	500	33.61	148.96	2.14796	0	0	-	-	-	gi|226463274|gb|EEH60552.1|/4e-49/iron-sulfur cofactor synthesis protein [Micromonas pusilla CCMP1545]
Unigene34009_Taxus	7	33	2.22	9.83	2.14663	6.59122e-05	0.00030248	-	-	-	gi|84314023|gb|ABC55648.1|/1e-22/MYB transcription factor [Hevea brasiliensis]
Unigene31617_Taxus	20	94	6.34	28.01	2.14339	1.70501e-09	1.60628e-08	-	-	-	-
Unigene8310_Taxus	13	61	4.12	18.17	2.14084	2.1062e-07	1.51788e-06	-	-	-	gi|82697963|gb|ABB89016.1|/3e-07/CXE carboxylesterase [Actinidia deliciosa]
Unigene30144_Taxus	13	61	4.12	18.17	2.14084	2.1062e-07	1.51726e-06	-	-	-	-
Unigene30983_Taxus	231	1081	73.25	322.06	2.13643	0	0	-	-	-	-
Unigene9763_Taxus	37	173	11.73	51.54	2.13549	9.10382e-14	1.41276e-12	-	-	-	gi|226456273|gb|EEH53574.1|/3e-11/fanciful K+ uptake-b family [Micromonas pusilla CCMP1545]
Unigene5706_Taxus	9	42	2.85	12.51	2.13405	8.02592e-06	4.38998e-05	-	-	-	gi|41056592|gb|AAR98738.1|/3e-06/signal peptide peptidase [Galega orientalis]
Unigene2606_Taxus	9	42	2.85	12.51	2.13405	8.02592e-06	4.38864e-05	-	-	-	gi|21929723|gb|AAM81973.1|/5e-15/barley stem rust resistance protein [Hordeum vulgare subsp. spontaneum]
Unigene8896_Taxus	39	182	12.37	54.22	2.13198	7.74936e-14	1.22172e-12	-	-	-	gi|189194379|ref|XP_001933528.1|/5e-06/mannitol 1-phosphate dehydrogenase [Pyrenophora tritici-repentis Pt-1C-BFP] >gi|187979092|gb|EDU45718.1| mannitol 1-phosphate dehydrogenase [Pyrenophora tritici-repentis Pt-1C-BFP]
Unigene36322_Taxus	36	168	11.42	50.05	2.13181	1.21902e-13	1.8342e-12	-	-	-	gi|30698272|ref|NP_851285.1|/5e-23/ABA1 (ABA DEFICIENT 1); zeaxanthin epoxidase [Arabidopsis thaliana] >gi|9758548|dbj|BAB08942.1| zeaxanthin epoxidase precursor [Arabidopsis thaliana] >gi|20260492|gb|AAM13144.1| zeaxanthin epoxidase precursor [Arabidopsis thaliana]
Unigene19714_Taxus	58	270	18.39	80.44	2.12899	0	0	-	-	-	-
Unigene11812_Taxus	40	186	12.68	55.41	2.12759	6.9722e-14	1.10803e-12	GO:0005840//ribosome;GO:0009536//plastid	GO:0003735//structural constituent of ribosome;GO:0003723//RNA binding	GO:0006412//translation	gi|242620052|ref|YP_003002056.1|/6e-14/50S ribosomal protein L24 [Aureococcus anophagefferens] >gi|239997297|gb|ACS36820.1| 50S ribosomal protein L24 [Aureococcus anophagefferens]
Unigene30113_Taxus	23	106	7.29	31.58	2.11502	2.28408e-10	2.37958e-09	-	-	-	gi|15222021|ref|NP_175329.1|/4e-08/glycine-rich protein / oleosin [Arabidopsis thaliana] >gi|7770342|gb|AAF69712.1|AC016041_17 F27J15.22 [Arabidopsis thaliana]
Unigene34506_Taxus	102	469	32.34	139.73	2.11125	0	0	-	-	-	gi|115456549|ref|NP_001051875.1|/1e-05/Os03g0844900 [Oryza sativa (japonica cultivar-group)] >gi|108712064|gb|ABF99859.1| S1 RNA binding domain containing protein, expressed [Oryza sativa (japonica cultivar-group)] >gi|113550346|dbj|BAF13789.1| Os03g0844900 [Oryza sativa Japonica Group]
Unigene824_Taxus	32	147	10.15	43.8	2.10945	7.41852e-13	1.01273e-11	-	-	-	gi|30685319|ref|NP_188574.2|/2e-06/late embryogenesis abundant protein-related / LEA protein-related [Arabidopsis thaliana]
Unigene27923_Taxus	120	551	38.05	164.16	2.10913	0	0	-	-	-	-
Unigene17566_Taxus	98	450	31.08	134.07	2.10893	0	0	-	-	-	gi|73918053|gb|AAZ93636.1|/2e-24/pathogen-induced defense-responsive protein 8 [Oryza sativa Indica Group]
Unigene27103_Taxus	55	252	17.44	75.08	2.10603	0	0	-	-	-	-
Unigene34497_Taxus	14	64	4.44	19.07	2.10267	1.1505e-07	8.6227e-07	-	-	-	gi|224004232|ref|XP_002295767.1|/3e-18/rubredoxin, rubredoxin-type Fe4 protein [Thalassiosira pseudonana CCMP1335] >gi|209585799|gb|ACI64484.1| rubredoxin, rubredoxin-type Fe4 protein [Thalassiosira pseudonana CCMP1335]
Unigene34430_Taxus	30	137	9.51	40.82	2.10176	2.33724e-12	3.00201e-11	-	-	-	gi|6685165|gb|AAF23823.1|AF219380_1/6e-32/beta-glucosidase [Arabidopsis thaliana]
Unigene19622_Taxus	23	105	7.29	31.28	2.10125	2.28706e-10	2.3813e-09	-	-	-	gi|255679014|dbj|BAH94642.1|/1e-52/Os09g0491692 [Oryza sativa Japonica Group]
Unigene12505_Taxus	25	114	7.93	33.96	2.09844	5.99514e-11	6.65857e-10	-	-	-	gi|229915490|gb|ACQ90834.1|/1e-148/magnesium chelatase subunit of protochlorophyllide reductase [Pedinomonas minor]
Unigene35767_Taxus	27	123	8.56	36.64	2.09774	1.5913e-11	1.88241e-10	-	-	-	gi|147854722|emb|CAN82391.1|/4e-08/hypothetical protein [Vitis vinifera]
Unigene18319_Taxus	29	132	9.2	39.33	2.09592	4.38094e-12	5.46161e-11	-	-	-	gi|116781209|gb|ABK22005.1|/8e-32/unknown [Picea sitchensis]
Unigene10371_Taxus	11	50	3.49	14.9	2.09401	1.57792e-06	9.78102e-06	-	-	-	gi|255586944|ref|XP_002534072.1|/1e-115/ER glycerol-phosphate acyltransferase [Ricinus communis] >gi|223525899|gb|EEF28316.1| ER glycerol-phosphate acyltransferase [Ricinus communis]
Unigene29549_Taxus	13	59	4.12	17.58	2.09322	2.70766e-07	1.90811e-06	-	-	-	-
Unigene3009_Taxus	30	135	9.51	40.22	2.0804	2.33768e-12	2.9961e-11	-	-	-	gi|255675240|dbj|BAH92532.1|/5e-08/Os04g0226800 [Oryza sativa Japonica Group]
Unigene35653_Taxus	48	216	15.22	64.35	2.07997	7.17204e-14	1.13472e-12	-	-	-	gi|116055837|emb|CAL57922.1|/4e-07/FKBP-type peptidyl-prolyl cis-trans isomerase (ISS) [Ostreococcus tauri]
Unigene5208_Taxus	8	36	2.54	10.73	2.07875	4.18262e-05	0.000198332	-	-	-	gi|115479565|ref|NP_001063376.1|/1e-27/Os09g0458400 [Oryza sativa (japonica cultivar-group)] >gi|113631609|dbj|BAF25290.1| Os09g0458400 [Oryza sativa Japonica Group]
Unigene20218_Taxus	8	36	2.54	10.73	2.07875	4.18262e-05	0.000198279	-	-	-	gi|30680708|ref|NP_192570.2|/3e-92/nodulin MtN21 family protein [Arabidopsis thaliana] >gi|63003784|gb|AAY25421.1| At4g08300 [Arabidopsis thaliana] >gi|110738842|dbj|BAF01344.1| nodulin-like protein [Arabidopsis thaliana]
Unigene20303_Taxus	37	166	11.73	49.46	2.07606	9.10382e-14	1.4103e-12	-	-	-	gi|115441831|ref|NP_001045195.1|/2e-14/Os01g0916600 [Oryza sativa (japonica cultivar-group)] >gi|2624328|emb|CAA05729.1| OsGRP2 [Oryza sativa (japonica cultivar-group)] >gi|19386753|dbj|BAB86134.1| OsGRP2 [Oryza sativa Japonica Group] >gi|20805007|dbj|BAB92683.1| OsGRP2 [Oryza sativa Japonica Group] >gi|113534726|dbj|BAF07109.1| Os01g0916600 [Oryza sativa Japonica Group]
Unigene12228_Taxus	44	197	13.95	58.69	2.07285	4.70734e-14	7.65856e-13	-	-	-	gi|254033594|gb|ACT55265.1|/6e-06/formin 2B [Physcomitrella patens]
Unigene32869_Taxus	17	76	5.39	22.64	2.07052	1.4222e-08	1.19794e-07	-	-	-	gi|240275492|gb|EER39006.1|/2e-07/misfolded glycoproteins degradation protein Yos9 [Ajellomyces capsulatus H143]
Unigene3190_Taxus	19	85	6.03	25.32	2.07005	3.49046e-09	3.17258e-08	-	-	-	gi|15081620|gb|AAK82465.1|/2e-30/AT5g59400/f2o15_60 [Arabidopsis thaliana] >gi|15777877|gb|AAL05899.1| AT5g59400/f2o15_60 [Arabidopsis thaliana]
Unigene36157_Taxus	11	49	3.49	14.6	2.06467	2.15356e-06	1.29614e-05	-	-	-	gi|115469492|ref|NP_001058345.1|/1e-12/Os06g0675300 [Oryza sativa (japonica cultivar-group)] >gi|113596385|dbj|BAF20259.1| Os06g0675300 [Oryza sativa Japonica Group]
Unigene19484_Taxus	27	120	8.56	35.75	2.06226	1.5941e-11	1.88447e-10	-	-	-	gi|15242870|ref|NP_198334.1|/3e-78/PAP26 (PURPLE ACID PHOSPHATASE 26); acid phosphatase/ protein serine/threonine phosphatase [Arabidopsis thaliana] >gi|75249765|sp|Q949Y3.1|PPA26_ARATH RecName: Full=Bifunctional purple acid phosphatase 26; Includes: RecName: Full=Acid phosphatase; Includes: RecName: Full=Peroxidase; Flags: Precursor
Unigene21416_Taxus	34	151	10.78	44.99	2.06125	2.59126e-13	3.73188e-12	-	-	-	gi|14530687|dbj|BAB61056.1|/3e-91/WRKY DNA-binding protein [Nicotiana tabacum]
Unigene35332_Taxus	18	80	5.71	23.83	2.06122	7.14306e-09	6.25018e-08	-	-	-	gi|3023160|gb|AAC12646.1|/1e-107/geranylgeranyl reductase [Zantedeschia aethiopica]
Unigene1949_Taxus	7	31	2.22	9.24	2.05733	0.000160177	0.000670635	-	-	-	-
Unigene10799_Taxus	7	31	2.22	9.24	2.05733	0.000160177	0.000670478	-	-	-	-
Unigene9510_Taxus	21	93	6.66	27.71	2.05681	9.00264e-10	8.80736e-09	-	-	-	gi|115466936|ref|NP_001057067.1|/2e-08/Os06g0199400 [Oryza sativa (japonica cultivar-group)]
Unigene23359_Taxus	31	137	9.83	40.82	2.05401	1.28852e-12	1.7067e-11	-	-	-	-
Unigene3272_Taxus	88	388	27.91	115.6	2.05029	0	0	-	-	-	gi|195617456|gb|ACG30558.1|/6e-22/RING finger protein 5 [Zea mays]
Unigene19687_Taxus	10	44	3.17	13.11	2.04811	7.245e-06	4.01336e-05	-	-	-	gi|17064728|gb|AAL32518.1|/3e-66/Unknown protein [Arabidopsis thaliana]
Unigene35500_Taxus	74	325	23.47	96.83	2.04464	0	0	-	-	-	gi|6324045|ref|NP_014115.1|/2e-10/Mitochondrial ribosomal protein of the large subunit; appears as two protein spots (YmL10 and YmL18) on two-dimensional SDS gels [Saccharomyces cerevisiae] >gi|1710599|sp|P36520.2|RM10_YEAST RecName: Full=54S ribosomal protein L10, mitochondrial; AltName: Full=YmL10/YmL18; Flags: Precursor >gi|151944265|gb|EDN62543.1| YmL10 [Saccharomyces cerevisiae YJM789] >gi|1…
Unigene35692_Taxus	122	535	38.69	159.39	2.04253	0	0	-	-	-	gi|157849694|gb|ABV89630.1|/1e-48/aluminum-induced protein-like protein [Brassica rapa]
Unigene26130_Taxus	201	880	63.74	262.18	2.04029	0	0	-	-	-	-
Unigene34006_Taxus	136	595	43.13	177.27	2.03918	1.03251e-13	1.57754e-12	-	-	-	gi|1136793|emb|CAA62760.1|/6e-35/PMSR protein [Brassica napus]
Unigene16553_Taxus	8	35	2.54	10.43	2.03784	6.47088e-05	0.000297263	GO:0016021//integral to membrane;GO:0009536//plastid	GO:0005488//binding;GO:0015299//solute:hydrogen antiporter activity	GO:0006813//potassium ion transport;GO:0008152//metabolic process	gi|226457900|gb|EEH55198.1|/4e-85/monovalent Cation:Proton antiporter-2 family [Micromonas pusilla CCMP1545]
Unigene27648_Taxus	458	1995	145.23	594.36	2.033	1.31783e-12	1.74163e-11	-	-	-	-
Unigene27630_Taxus	14	61	4.44	18.17	2.03293	1.91961e-07	1.39242e-06	-	-	-	-
Unigene30780_Taxus	17	74	5.39	22.05	2.03242	1.68482e-08	1.41048e-07	-	-	-	-
Unigene19202_Taxus	20	87	6.34	25.92	2.03151	1.8851e-09	1.7666e-08	-	-	-	gi|2499553|sp|Q43125.1|CRY1_ARATH/0.0/RecName: Full=Cryptochrome-1; AltName: Full=Blue light photoreceptor; AltName: Full=Protein OUT OF PHASE 2; Short=OOP2; AltName: Full=Protein BLUE LIGHT UNINHIBITED 1; AltName: Full=Protein ELONGATED HYPOCOTYL 4 >gi|442529|gb|AAB28724.1| flavin-type blue-light photoreceptor [Arabidopsis thaliana]
Unigene35678_Taxus	15	65	4.76	19.37	2.02479	8.82468e-08	6.76179e-07	-	-	-	gi|226492308|ref|NP_001149657.1|/1e-140/serine/threonine-protein kinase SAPK8 [Zea mays] >gi|188011171|gb|ACD44937.1| osmotic stress/ABA-activated protein kinase [Zea mays] >gi|195629240|gb|ACG36261.1| serine/threonine-protein kinase SAPK8 [Zea mays]
Unigene36354_Taxus	15	65	4.76	19.37	2.02479	8.82468e-08	6.75889e-07	-	-	-	gi|86991202|gb|ABD16062.1|/9e-14/Kelch-motif containing protein [Oryza rufipogon]
Unigene15999_Taxus	25	108	7.93	32.18	2.02077	6.12472e-11	6.78557e-10	-	-	-	gi|6782436|gb|AAF28385.1|AF151214_1/9e-23/lipid-transfer protein [Nicotiana glauca]
Unigene19935_Taxus	19	82	6.03	24.43	2.01842	4.03512e-09	3.64717e-08	-	-	-	gi|115455231|ref|NP_001051216.1|/2e-26/Os03g0739700 [Oryza sativa (japonica cultivar-group)] >gi|108710985|gb|ABF98780.1| expressed protein [Oryza sativa (japonica cultivar-group)] >gi|113549687|dbj|BAF13130.1| Os03g0739700 [Oryza sativa Japonica Group]
Unigene13198_Taxus	58	250	18.39	74.48	2.01793	0	0	-	-	-	gi|15241990|ref|NP_201092.1|/8e-06/F-box family protein-related [Arabidopsis thaliana]
Unigene34735_Taxus	26	112	8.24	33.37	2.01784	3.13796e-11	3.61129e-10	-	-	-	gi|226529308|ref|NP_001149932.1|/3e-06/vegetative cell wall protein gp1 [Zea mays] >gi|195635573|gb|ACG37255.1| vegetative cell wall protein gp1 precursor [Zea mays]
Unigene10609_Taxus	78	335	24.73	99.81	2.01292	0	0	-	-	-	gi|149688570|gb|ABR27730.1|/8e-80/dirigent-like protein [Picea sitchensis]
Unigene33478_Taxus	21	90	6.66	26.81	2.00918	9.91454e-10	9.59411e-09	-	-	-	gi|5902707|sp|Q40412.1|ABA2_NICPL/1e-06/RecName: Full=Zeaxanthin epoxidase, chloroplastic; Flags: Precursor >gi|1370274|emb|CAA65048.1| zeaxanthin epoxidase [Nicotiana plumbaginifolia]
Unigene21460_Taxus	57	244	18.08	72.69	2.00736	6.88338e-15	1.20223e-13	-	-	-	gi|255674614|dbj|BAF12346.2|/7e-12/Os03g0432900 [Oryza sativa Japonica Group]
Unigene16786_Taxus	11	47	3.49	14	2.00413	4.51826e-06	2.56919e-05	-	-	-	-
Unigene19784_Taxus	12	51	3.81	15.19	1.99526	1.89852e-06	1.16347e-05	-	-	-	gi|259146707|emb|CAY79964.1|/7e-29/EC1118_1G1_5358p [Saccharomyces cerevisiae EC1118]
Unigene2640_Taxus	12	51	3.81	15.19	1.99526	1.89852e-06	1.16307e-05	-	-	-	-
Unigene36207_Taxus	109	462	34.56	137.64	1.99372	0	0	-	-	-	gi|71608994|emb|CAH58712.1|/3e-52/pectin methylesterase precursor [Physcomitrella patens]
Unigene34371_Taxus	59	250	18.71	74.48	1.99304	0	0	-	-	-	gi|226508898|ref|NP_001148518.1|/5e-46/malate dehydrogenase, glyoxysomal [Zea mays] >gi|195619966|gb|ACG31813.1| malate dehydrogenase, glyoxysomal precursor [Zea mays]
Unigene35819_Taxus	87	366	27.59	109.04	1.98264	0	0	-	-	-	gi|226533300|ref|NP_001150476.1|/1e-43/LOC100284107 [Zea mays]
Unigene7081_Taxus	34	143	10.78	42.6	1.9825	2.5957e-13	3.73525e-12	-	-	-	gi|79325155|ref|NP_001031662.1|/3e-14/PUP8 (ARABIDOPSIS THALIANA PURINE PERMEASE 8); purine transmembrane transporter [Arabidopsis thaliana] >gi|122230053|sp|Q0WRB9.1|PUP8_ARATH RecName: Full=Probable purine permease 8; Short=AtPUP8
Unigene18114_Taxus	83	348	26.32	103.68	1.97791	9.57012e-14	1.47612e-12	-	-	-	gi|255076059|ref|XP_002501704.1|/5e-89/cytochrome oxidase biogenesis family [Micromonas sp. RCC299] >gi|226516968|gb|ACO62962.1| cytochrome oxidase biogenesis family [Micromonas sp. RCC299]
Unigene34737_Taxus	22	92	6.98	27.41	1.9734	5.69538e-10	5.72268e-09	-	-	-	-
Unigene28490_Taxus	17	71	5.39	21.15	1.9723	2.97268e-08	2.41378e-07	-	-	-	-
Unigene9394_Taxus	52	217	16.49	64.65	1.97106	9.54792e-15	1.64662e-13	-	-	-	gi|40645464|dbj|BAD06577.1|/8e-10/cell wall protein Awa1p [Saccharomyces cerevisiae]
Unigene4418_Taxus	36	150	11.42	44.69	1.96839	1.21902e-13	1.83886e-12	GO:0044464//cell part	-	-	gi|121735549|sp|Q0CEN9.1|TPC1_ASPTN/2e-46/RecName: Full=Mitochondrial thiamine pyrophosphate carrier 1
Unigene13683_Taxus	18	75	5.71	22.34	1.96807	1.34569e-08	1.13997e-07	-	-	-	gi|31711716|gb|AAP68214.1|/2e-79/At4g24530 [Arabidopsis thaliana] >gi|110743919|dbj|BAE99793.1| PsRT17-1 like protein [Arabidopsis thaliana]
Unigene33042_Taxus	31	129	9.83	38.43	1.96697	1.31428e-12	1.73823e-11	-	-	-	gi|157093708|gb|ABV22580.1|/8e-20/fiddlehead [Hordeum vulgare subsp. vulgare] >gi|157093710|gb|ABV22581.1| fiddlehead [Hordeum vulgare subsp. vulgare] >gi|157093722|gb|ABV22587.1| fiddlehead [Hordeum vulgare subsp. vulgare]
Unigene24098_Taxus	122	506	38.69	150.75	1.96213	0	0	GO:0009536//plastid	-	-	gi|3776581|gb|AAC64898.1|/8e-06/Similar to Beta integral membrane protein homolog gb|U43629 from A. thaliana [Arabidopsis thaliana]
Unigene23452_Taxus	274	1136	86.89	338.44	1.96164	0	0	-	-	-	-
Unigene18596_Taxus	14	58	4.44	17.28	1.96047	4.95756e-07	3.35941e-06	-	-	-	gi|255679912|dbj|BAH95159.1|/8e-17/Os11g0219000 [Oryza sativa Japonica Group]
Unigene31833_Taxus	15	62	4.76	18.47	1.95615	2.11182e-07	1.52008e-06	-	-	-	gi|116055146|emb|CAL57542.1|/1e-12/oxygen-evolving complex-related (ISS) [Ostreococcus tauri]
Unigene20875_Taxus	41	169	13	50.35	1.95348	1.06137e-13	1.6161e-12	-	-	-	gi|30677920|ref|NP_849923.1|/1e-133/PIN4 (PIN-FORMED 4); auxin:hydrogen symporter/ transporter [Arabidopsis thaliana] >gi|42558871|sp|Q8RWZ6.1|PIN4_ARATH RecName: Full=Auxin efflux carrier component 4; Short=AtPIN4
Unigene335_Taxus	9	37	2.85	11.02	1.95109	6.34216e-05	0.000291576	-	-	-	-
Unigene17247_Taxus	109	447	34.56	133.17	1.94609	0	0	-	-	-	gi|92019685|dbj|BAE93235.1|/0.0/potassium transporter [Phragmites australis]
Unigene1438_Taxus	10	41	3.17	12.21	1.94551	2.55914e-05	0.000127706	-	-	-	gi|224101381|ref|XP_002312255.1|/2e-75/cytochrome P450 [Populus trichocarpa] >gi|222852075|gb|EEE89622.1| cytochrome P450 [Populus trichocarpa]
Unigene26806_Taxus	11	45	3.49	13.41	1.94201	1.04003e-05	5.54569e-05	-	-	-	-
Unigene27688_Taxus	22	90	6.98	26.81	1.94147	7.52396e-10	7.44663e-09	-	-	-	-
Unigene3975_Taxus	13	53	4.12	15.79	1.93829	1.75516e-06	1.08194e-05	-	-	-	gi|115455473|ref|NP_001051337.1|/3e-92/Os03g0758900 [Oryza sativa (japonica cultivar-group)] >gi|33519192|gb|AAQ20911.1| WRKY11 [Oryza sativa Japonica Group] >gi|108711194|gb|ABF98989.1| WRKY DNA binding domain containing protein, expressed [Oryza sativa (japonica cultivar-group)] >gi|113549808|dbj|BAF13251.1| Os03g0758900 [Oryza sativa Japonica Group]
Unigene14852_Taxus	60	244	19.03	72.69	1.93348	0	0	-	-	-	gi|115481108|ref|NP_001064147.1|/3e-09/Os10g0142100 [Oryza sativa (japonica cultivar-group)] >gi|78707751|gb|ABB46726.1| Zinc finger, C3HC4 type family protein, expressed [Oryza sativa (japonica cultivar-group)] >gi|110288599|gb|ABB46725.2| Zinc finger, C3HC4 type family protein, expressed [Oryza sativa (japonica cultivar-group)] >gi|113638756|dbj|BAF26061.1| Os10g0142100 [Oryza sativa Japonica G…
Unigene35661_Taxus	91	370	28.86	110.23	1.93337	0	0	-	-	-	gi|269101020|ref|YP_003289168.1|/6e-65/50S ribosomal protein L1 [Ectocarpus siliculosus] >gi|266631528|emb|CAV31199.1| Chloroplast 50S ribosomal protein L1 [Ectocarpus siliculosus] >gi|270118658|emb|CAT18712.1| Chloroplast 50S ribosomal protein L1 [Ectocarpus siliculosus]
Unigene15404_Taxus	71	288	22.51	85.8	1.93041	0	0	-	-	-	gi|159482516|ref|XP_001699315.1|/9e-13/permease-like component of an ABC transporter [Chlamydomonas reinhardtii] >gi|158272951|gb|EDO98745.1| permease-like component of an ABC transporter [Chlamydomonas reinhardtii]
Unigene15430_Taxus	20	81	6.34	24.13	1.92827	4.58122e-09	4.11156e-08	-	-	-	-
Unigene25969_Taxus	113	456	35.83	135.85	1.92277	1.74305e-13	2.57911e-12	-	-	-	-
Unigene24101_Taxus	159	641	50.42	190.97	1.92128	0	0	-	-	-	-
Unigene31094_Taxus	284	1140	90.06	339.64	1.91505	0	0	-	-	-	gi|219129451|ref|XP_002184902.1|/1e-07/xylose isomerase [Phaeodactylum tricornutum CCAP 1055/1] >gi|217403687|gb|EEC43638.1| xylose isomerase [Phaeodactylum tricornutum CCAP 1055/1]
Unigene16495_Taxus	9	36	2.85	10.73	1.91262	9.89476e-05	0.000432789	-	-	-	gi|115459218|ref|NP_001053209.1|/9e-07/Os04g0497900 [Oryza sativa (japonica cultivar-group)] >gi|38345391|emb|CAD41245.2| OSJNBa0067K08.20 [Oryza sativa (japonica cultivar-group)] >gi|113564780|dbj|BAF15123.1| Os04g0497900 [Oryza sativa Japonica Group]
Unigene268_Taxus	20	80	6.34	23.83	1.91022	6.21152e-09	5.49172e-08	-	-	-	gi|255678651|dbj|BAF24395.2|/5e-31/Os08g0557100 [Oryza sativa Japonica Group]
Unigene35900_Taxus	21	84	6.66	25.03	1.91006	2.7124e-09	2.505e-08	-	-	-	gi|2191197|gb|AAB61082.1|/6e-06/contains similarity to Synechococcus PCC7942 chromosomal region used as basis of neutral siteII recombinational cloning vector (PID:g1174192) [Arabidopsis thaliana]
Unigene23561_Taxus	14	56	4.44	16.68	1.90949	1.09421e-06	7.00693e-06	-	-	-	-
Unigene3144_Taxus	11	44	3.49	13.11	1.90937	1.6027e-05	8.32907e-05	-	-	-	gi|62319273|dbj|BAD94501.1|/6e-12/potassium channel - protein [Arabidopsis thaliana]
Unigene35642_Taxus	12	48	3.81	14.3	1.90815	6.5103e-06	3.62894e-05	-	-	-	gi|112837|sp|P26690.1|6DCS_SOYBN/3e-71/RecName: Full=NAD(P)H-dependent 6'-deoxychalcone synthase >gi|18728|emb|CAA39261.1| NAD(P)H dependent 6'-deoxychalcone synthase; reductase [Glycine max]
Unigene5928_Taxus	8	32	2.54	9.53	1.90765	0.00024835	0.000996252	-	-	-	gi|16516993|gb|AAL24466.1|AF359522_1/1e-21/inward rectifying potassium channel [Vitis vinifera]
Unigene22746_Taxus	114	454	36.15	135.26	1.90367	2.06502e-14	3.48045e-13	-	-	-	gi|68299211|emb|CAJ13706.1|/4e-15/Phi-1 protein [Capsicum chinense]
Unigene35004_Taxus	56	223	17.76	66.44	1.90342	0	0	-	-	-	gi|102139900|gb|ABF70049.1|/8e-10/U-box domain-containing protein [Musa acuminata]
Unigene20550_Taxus	42	167	13.32	49.75	1.9011	7.86038e-14	1.23268e-12	GO:0009536//plastid	-	-	gi|115477166|ref|NP_001062179.1|/3e-13/Os08g0504500 [Oryza sativa (japonica cultivar-group)] >gi|113624148|dbj|BAF24093.1| Os08g0504500 [Oryza sativa Japonica Group]
Unigene34254_Taxus	29	115	9.2	34.26	1.89682	6.66578e-12	8.17281e-11	-	-	-	gi|11467648|ref|NP_050700.1|/4e-06/ribosomal protein S6 [Guillardia theta] >gi|6094139|sp|O78447.1|RR6_GUITH RecName: Full=30S ribosomal protein S6, chloroplastic >gi|3602973|gb|AAC35634.1| ribosomal protein S6 [Guillardia theta]
Unigene16745_Taxus	24	95	7.61	28.3	1.89483	3.13478e-10	3.22437e-09	-	-	-	gi|255085312|ref|XP_002505087.1|/4e-12/chlorophyll a/b-binding protein, psi-associated, chloroplast precursor [Micromonas sp. RCC299] >gi|226520356|gb|ACO66345.1| chlorophyll a/b-binding protein, psi-associated, chloroplast precursor [Micromonas sp. RCC299]
Unigene16269_Taxus	20	79	6.34	23.54	1.89256	8.7474e-09	7.57584e-08	-	-	-	gi|116783334|gb|ABK22897.1|/4e-06/unknown [Picea sitchensis]
Unigene2120_Taxus	52	205	16.49	61.07	1.88887	9.54792e-15	1.64982e-13	-	-	-	gi|194476908|ref|YP_002049087.1|/1e-28/trigger factor [Paulinella chromatophora] >gi|171191915|gb|ACB42877.1| trigger factor [Paulinella chromatophora]
Unigene13302_Taxus	17	67	5.39	19.96	1.88875	1.17019e-07	8.7629e-07	-	-	-	gi|81295670|gb|ABB70128.1|/2e-08/homogentisate phytyltransferase VTE2-2 [Glycine max]
Unigene13420_Taxus	62	243	19.66	72.4	1.88073	0	0	-	-	-	-
Unigene16141_Taxus	24	94	7.61	28.01	1.87997	4.23082e-10	4.29715e-09	-	-	-	gi|15220284|ref|NP_172576.1|/9e-61/hydrolase, alpha/beta fold family protein [Arabidopsis thaliana] >gi|1931639|gb|AAB65474.1| lysophospholipase isolog; 25331-24357 [Arabidopsis thaliana] >gi|31711728|gb|AAP68220.1| At1g11090 [Arabidopsis thaliana]
Unigene27211_Taxus	440	1721	139.53	512.73	1.87762	0	0	-	-	-	-
Unigene9380_Taxus	30	117	9.51	34.86	1.87406	4.6081e-12	5.72877e-11	-	-	-	gi|15240467|ref|NP_200323.1|/1e-09/VTC5 (VITAMIN C DEFECTIVE 5); GDP-D-glucose phosphorylase/ galactose-1-phosphate guanylyltransferase (GDP)/ quercetin 4'-O-glucosyltransferase [Arabidopsis thaliana]
Unigene30236_Taxus	88	343	27.91	102.19	1.8724	0	0	-	-	-	-
Unigene7516_Taxus	17	66	5.39	19.66	1.86691	1.75461e-07	1.27742e-06	-	-	-	-
Unigene4785_Taxus	25	97	7.93	28.9	1.86568	2.54836e-10	2.64101e-09	-	-	-	gi|116310121|emb|CAH67138.1|/5e-10/OSIGBa0130P02.2 [Oryza sativa (indica cultivar-group)]
Unigene29375_Taxus	197	761	62.47	226.72	1.85968	0	0	-	-	-	-
Unigene33621_Taxus	14	54	4.44	16.09	1.85753	2.54398e-06	1.51221e-05	-	-	-	gi|30468235|ref|NP_849122.1|/3e-13/ATP synthase CF0 B' subunit [Cyanidioschyzon merolae strain 10D] >gi|75298603|sp|Q85FR1.1|ATPX_CYAME RecName: Full=ATP synthase subunit b', chloroplastic; AltName: Full=ATPase subunit II; AltName: Full=ATP synthase F(0) sector subunit b' >gi|30409335|dbj|BAC76284.1| ATP synthase CF0 B' chain subunit II [Cyanidioschyzon merolae strain 10D]
Unigene17907_Taxus	20	77	6.34	22.94	1.85531	1.87718e-08	1.56417e-07	-	-	-	-
Unigene19110_Taxus	13	50	4.12	14.9	1.8546	6.25928e-06	3.49449e-05	-	-	-	gi|14532506|gb|AAK63981.1|/1e-15/AT3g10970/F9F8_21 [Arabidopsis thaliana] >gi|22137294|gb|AAM91492.1| AT3g10970/F9F8_21 [Arabidopsis thaliana]
Unigene20854_Taxus	13	50	4.12	14.9	1.8546	6.25928e-06	3.49339e-05	-	-	-	gi|194476802|ref|YP_002048981.1|/2e-31/Mg-protoporphyrin IX methyl transferase [Paulinella chromatophora] >gi|171191809|gb|ACB42771.1| Mg-protoporphyrin IX methyl transferase [Paulinella chromatophora]
Unigene33323_Taxus	75	287	23.78	85.5	1.84618	0	0	-	GO:0046872//metal ion binding	-	gi|226504226|ref|NP_001150850.1|/8e-13/RING-H2 finger protein ATL2B [Zea mays] >gi|195642368|gb|ACG40652.1| RING-H2 finger protein ATL2B [Zea mays]
Unigene26750_Taxus	40	153	12.68	45.58	1.84585	7.14984e-14	1.13222e-12	-	-	-	-
Unigene35860_Taxus	29	111	9.2	33.07	1.84582	1.76499e-11	2.07683e-10	-	-	-	gi|23306122|gb|AAN17389.1|/2e-21/Unknown protein [Oryza sativa Japonica Group]
Unigene23380_Taxus	29	111	9.2	33.07	1.84582	1.76499e-11	2.07546e-10	-	-	-	-
Unigene34321_Taxus	157	600	49.79	178.76	1.8441	0	0	-	-	-	gi|115488908|ref|NP_001066941.1|/4e-43/Os12g0538500 [Oryza sativa (japonica cultivar-group)] >gi|108862778|gb|ABA99335.2| CHY zinc finger family protein, expressed [Oryza sativa (japonica cultivar-group)] >gi|113649448|dbj|BAF29960.1| Os12g0538500 [Oryza sativa Japonica Group]
Unigene11214_Taxus	11	42	3.49	12.51	1.84178	3.84032e-05	0.000183715	-	-	-	-
Unigene928_Taxus	81	309	25.69	92.06	1.84137	1.17684e-14	2.00817e-13	GO:0016023//cytoplasmic membrane-bounded vesicle;GO:0016020//membrane	-	-	gi|115455067|ref|NP_001051134.1|/1e-103/Os03g0726300 [Oryza sativa (japonica cultivar-group)] >gi|41469277|gb|AAS07159.1| expressed protein [Oryza sativa Japonica Group] >gi|50428731|gb|AAT77082.1| expressed protein [Oryza sativa Japonica Group] >gi|113549605|dbj|BAF13048.1| Os03g0726300 [Oryza sativa Japonica Group]
Unigene12550_Taxus	30	114	9.51	33.96	1.83632	1.07674e-11	1.28739e-10	-	-	-	gi|115469704|ref|NP_001058451.1|/6e-30/Os06g0695600 [Oryza sativa (japonica cultivar-group)] >gi|113596491|dbj|BAF20365.1| Os06g0695600 [Oryza sativa Japonica Group]
Unigene29287_Taxus	35	133	11.1	39.62	1.83567	3.24852e-13	4.62239e-12	-	-	-	gi|159483789|ref|XP_001699943.1|/4e-08/single helix LHC light protein [Chlamydomonas reinhardtii] >gi|54649968|dbj|BAD67135.1| Lhc-like protein Lhl2 [Chlamydomonas reinhardtii] >gi|158281885|gb|EDP07639.1| single helix LHC light protein [Chlamydomonas reinhardtii]
Unigene32512_Taxus	62	235	19.66	70.01	1.8323	0	0	-	-	-	gi|11465765|ref|NP_053909.1|/8e-10/ribosomal protein L18 [Porphyra purpurea] >gi|1710414|sp|P51299.1|RK18_PORPU RecName: Full=50S ribosomal protein L18, chloroplastic >gi|1276765|gb|AAC08185.1| 50S ribosomal protein L18 [Porphyra purpurea]
Unigene5230_Taxus	171	648	54.23	193.06	1.83189	2.54908e-13	3.68005e-12	GO:0016023//cytoplasmic membrane-bounded vesicle	-	GO:0006412//translation	gi|30693047|ref|NP_174696.2|/8e-08/translation initiation factor 3 (IF-3) family protein [Arabidopsis thaliana] >gi|45773942|gb|AAS76775.1| At1g34360 [Arabidopsis thaliana]
Unigene22664_Taxus	14	53	4.44	15.79	1.83038	3.9069e-06	2.25393e-05	-	-	-	-
Unigene35237_Taxus	119	449	37.74	133.77	1.82559	0	0	-	-	-	gi|194466209|gb|ACF74335.1|/3e-29/L-asparaginase [Arachis hypogaea]
Unigene34023_Taxus	49	184	15.54	54.82	1.81872	3.9968e-15	7.16328e-14	-	-	-	gi|71842326|ref|YP_277414.1|/5e-39/ribosomal protein L6 [Emiliania huxleyi] >gi|119361652|sp|Q4G353.1|RK6_EMIHU RecName: Full=50S ribosomal protein L6, chloroplastic >gi|60101569|gb|AAX13913.1| ribosomal protein L6 [Emiliania huxleyi]
Unigene25697_Taxus	36	135	11.42	40.22	1.81635	2.72226e-13	3.89535e-12	-	-	-	-
Unigene32373_Taxus	12	45	3.81	13.41	1.81545	2.38852e-05	0.000119661	-	-	-	gi|30681478|ref|NP_850942.1|/3e-21/LRR XI-23; ATP binding / kinase/ protein kinase/ protein serine/threonine kinase [Arabidopsis thaliana] >gi|17065208|gb|AAL32758.1| Unknown protein [Arabidopsis thaliana] >gi|224589386|gb|ACN59227.1| leucine-rich repeat receptor-like protein kinase [Arabidopsis thaliana]
Unigene24213_Taxus	12	45	3.81	13.41	1.81545	2.38852e-05	0.000119627	-	-	-	-
Unigene16565_Taxus	69	258	21.88	76.87	1.81281	0	0	-	-	-	-
Unigene35923_Taxus	19	71	6.03	21.15	1.81043	1.03772e-07	7.85013e-07	-	-	-	gi|6056395|gb|AAF02859.1|AC009324_8/7e-23/Hypothetical protein [Arabidopsis thaliana]
Unigene35823_Taxus	19	71	6.03	21.15	1.81043	1.03772e-07	7.8468e-07	-	-	-	gi|8493580|gb|AAF75803.1|AC011000_6/1e-32/Contains weak similarity to leaf protein from Ipomea nil gb|D85101 and contains a RepB PF|01051 protein and multiple PPR PF|01535 repeats [Arabidopsis thaliana]
Unigene6117_Taxus	47	175	14.9	52.14	1.80708	0	0	-	-	-	gi|55375993|gb|AAV50008.1|/6e-30/protein disulfide isomerase [Malus x domestica]
Unigene31743_Taxus	57	212	18.08	63.16	1.80462	6.88338e-15	1.20459e-13	-	-	-	-
Unigene35801_Taxus	24	89	7.61	26.52	1.80111	2.8353e-09	2.61443e-08	-	-	-	gi|255679803|dbj|BAF27634.2|/4e-67/Os11g0155500 [Oryza sativa Japonica Group]
Unigene7532_Taxus	20	74	6.34	22.05	1.79822	6.4869e-08	5.0553e-07	-	-	-	gi|224075319|ref|XP_002304592.1|/5e-34/AP2/ERF domain-containing transcription factor [Populus trichocarpa] >gi|222842024|gb|EEE79571.1| AP2/ERF domain-containing transcription factor [Populus trichocarpa]
Unigene17212_Taxus	20	74	6.34	22.05	1.79822	6.4869e-08	5.05309e-07	-	-	-	-
Unigene27168_Taxus	20	74	6.34	22.05	1.79822	6.4869e-08	5.05088e-07	-	-	-	-
Unigene11720_Taxus	30	111	9.51	33.07	1.79801	3.315e-11	3.8052e-10	-	-	-	-
Unigene16100_Taxus	10	37	3.17	11.02	1.79757	0.00014849	0.000626413	-	-	-	-
Unigene32938_Taxus	23	85	7.29	25.32	1.79629	6.8666e-09	6.01714e-08	-	-	-	-
Unigene29023_Taxus	79	292	25.05	86.99	1.79604	0	0	-	-	-	gi|19115116|ref|NP_594204.1|/2e-09/Ariadne homolog [Schizosaccharomyces pombe] >gi|74698267|sp|Q9P3U4.1|YKX2_SCHPO RecName: Full=Uncharacterized RING finger protein C328.02 >gi|8894853|emb|CAB95997.1| human Ariadne homolog [Schizosaccharomyces pombe]
Unigene18411_Taxus	13	48	4.12	14.3	1.7953	1.48475e-05	7.74546e-05	-	-	-	gi|15222058|ref|NP_172735.1|/3e-90/ATRBL6 (ARABIDOPSIS RHOMBOID-LIKE PROTEIN 6) [Arabidopsis thaliana] >gi|145323878|ref|NP_001077528.1| ATRBL6 (ARABIDOPSIS RHOMBOID-LIKE PROTEIN 6) [Arabidopsis thaliana]
Unigene28227_Taxus	38	140	12.05	41.71	1.79136	1.74971e-13	2.58467e-12	-	-	-	gi|221108850|ref|XP_002163737.1|/9e-34/PREDICTED: similar to 2-hydroxyacyl-CoA lyase 1 [Hydra magnipapillata] >gi|124360613|gb|ABN08612.1| Thiamine pyrophosphate enzyme, central region [Medicago truncatula]
Unigene23054_Taxus	307	1130	97.35	336.66	1.79004	0	0	GO:0016020//membrane;GO:0005739//mitochondrion	-	GO:0033554//cellular response to stress	gi|70985919|ref|XP_748464.1|/6e-06/benzodiazepine receptor family protein [Aspergillus fumigatus Af293] >gi|66846093|gb|EAL86426.1| benzodiazepine receptor family protein [Aspergillus fumigatus Af293] >gi|159128401|gb|EDP53516.1| benzodiazepine receptor family protein [Aspergillus fumigatus A1163]
Unigene19425_Taxus	96	353	30.44	105.17	1.78868	0	0	-	-	-	gi|115483106|ref|NP_001065146.1|/3e-60/Os10g0532100 [Oryza sativa (japonica cultivar-group)]
Unigene35318_Taxus	217	796	68.81	237.15	1.78511	1.01918e-13	1.55852e-12	-	-	-	gi|45593096|gb|AAS68137.1|/8e-36/homeodomain leucine zipper protein 16 [Oryza sativa Japonica Group]
Unigene23353_Taxus	30	110	9.51	32.77	1.78486	4.9632e-11	5.58203e-10	-	-	-	-
Unigene18031_Taxus	24	88	7.61	26.22	1.7847	4.29652e-09	3.8795e-08	-	-	-	gi|77554399|gb|ABA97195.1|/4e-07/expressed protein [Oryza sativa (japonica cultivar-group)]
Unigene9207_Taxus	77	282	24.42	84.02	1.78267	0	0	-	-	-	gi|75114857|sp|Q655S1.1|FTSH2_ORYSJ/2e-54/RecName: Full=Cell division protease ftsH homolog 2, chloroplastic; Short=OsFtsH2; Flags: Precursor
Unigene31745_Taxus	140	512	44.39	152.54	1.78088	0	0	-	-	-	gi|6684369|gb|AAF23551.1|AF110453_1/3e-53/alcohol dehydrogenase [Arabidopsis lyrata subsp. petraea]
Unigene30693_Taxus	45	164	14.27	48.86	1.77567	0	0	-	-	-	-
Unigene6499_Taxus	112	407	35.52	121.26	1.7714	0	0	-	-	-	-
Unigene12181_Taxus	19	69	6.03	20.56	1.76961	2.41594e-07	1.71474e-06	-	-	-	gi|190409146|gb|EDV12411.1|/1e-51/serine/threonine protein kinase [Saccharomyces cerevisiae RM11-1a]
Unigene3856_Taxus	16	58	5.07	17.28	1.76905	2.32886e-06	1.39037e-05	-	-	-	gi|225426132|ref|XP_002272796.1|/5e-06/PREDICTED: hypothetical protein [Vitis vinifera] >gi|270251025|emb|CBI34399.1| unnamed protein product [Vitis vinifera]
Unigene5904_Taxus	56	203	17.76	60.48	1.76783	0	0	-	-	-	gi|159479596|ref|XP_001697876.1|/1e-29/CPLD51 protein required for cyt b6 assembly [Chlamydomonas reinhardtii] >gi|145308398|gb|ABP57441.1| CCB1 [Chlamydomonas reinhardtii] >gi|158273974|gb|EDO99759.1| CPLD51 protein required for cyt b6 assembly [Chlamydomonas reinhardtii]
Unigene32584_Taxus	69	250	21.88	74.48	1.76724	0	0	-	-	-	gi|255552069|ref|XP_002517079.1|/3e-07/calmodulin binding protein, putative [Ricinus communis] >gi|223543714|gb|EEF45242.1| calmodulin binding protein, putative [Ricinus communis]
Unigene35541_Taxus	13	47	4.12	14	1.76471	2.28276e-05	0.000115467	-	-	-	gi|218511836|sp|Q6BYP9.2|SQS1_DEBHA/1e-05/RecName: Full=Protein SQS1 >gi|199429010|emb|CAG84626.2| DEHA2A07810p [Debaryomyces hansenii]
Unigene13504_Taxus	13	47	4.12	14	1.76471	2.28276e-05	0.000115434	-	-	-	gi|226502410|ref|NP_001151261.1|/1e-05/LOC100284894 [Zea mays] >gi|195645380|gb|ACG42158.1| ZIM motif family protein [Zea mays]
Unigene34001_Taxus	425	1536	134.77	457.62	1.76365	1.47971e-12	1.94402e-11	-	-	-	gi|115456333|ref|NP_001051767.1|/1e-07/Os03g0826800 [Oryza sativa (japonica cultivar-group)] >gi|108711857|gb|ABF99652.1| expressed protein [Oryza sativa (japonica cultivar-group)] >gi|113550238|dbj|BAF13681.1| Os03g0826800 [Oryza sativa Japonica Group]
Unigene13488_Taxus	71	256	22.51	76.27	1.76055	0	0	-	-	-	gi|115466856|ref|NP_001057027.1|/6e-19/Os06g0191200 [Oryza sativa (japonica cultivar-group)]
Unigene19275_Taxus	205	737	65.01	219.57	1.75595	3.8436e-13	5.41723e-12	-	-	-	-
Unigene3027_Taxus	36	129	11.42	38.43	1.75067	2.06902e-12	2.67098e-11	-	-	-	-
Unigene27564_Taxus	12	43	3.81	12.81	1.74941	5.66556e-05	0.000262161	-	-	-	-
Unigene9282_Taxus	12	43	3.81	12.81	1.74941	5.66556e-05	0.000262093	-	-	-	gi|124389898|gb|ABN11121.1|/3e-54/MYB transcription factor [Capsicum annuum]
Unigene13841_Taxus	16	57	5.07	16.98	1.74378	3.5624e-06	2.06186e-05	GO:0000325//plant-type vacuole;GO:0005886//plasma membrane;GO:0009536//plastid	GO:0017111//nucleoside-triphosphatase activity	-	gi|224132268|ref|XP_002321297.1|/0.0/multidrug resistance protein ABC transporter family [Populus trichocarpa] >gi|222862070|gb|EEE99612.1| multidrug resistance protein ABC transporter family [Populus trichocarpa]
Unigene7831_Taxus	11	39	3.49	11.62	1.73531	0.00014111	0.000596976	-	-	-	-
Unigene17761_Taxus	111	393	35.2	117.09	1.73397	0	0	-	-	-	-
Unigene33504_Taxus	94	332	29.81	98.91	1.73032	0	0	GO:0016020//membrane	-	-	gi|79567618|ref|NP_180949.2|/6e-23/calcium ion binding [Arabidopsis thaliana]
Unigene5289_Taxus	38	134	12.05	39.92	1.72808	1.25744e-12	1.67423e-11	-	-	-	gi|22652127|gb|AAN03627.1|AF406703_1/4e-79/BEL1-related homeotic protein 30 [Solanum tuberosum]
Unigene1537_Taxus	21	74	6.66	22.05	1.72718	1.43409e-07	1.06098e-06	-	-	-	gi|89355891|gb|ABD72269.1|/1e-05/plastid fibrillin 3 [Coffea canephora]
Unigene26678_Taxus	392	1381	124.31	411.44	1.72674	0	0	-	-	-	-
Unigene28752_Taxus	102	359	32.34	106.96	1.72568	0	0	-	-	-	-
Unigene28054_Taxus	31	109	9.83	32.47	1.72384	1.63046e-10	1.72999e-09	-	-	-	-
Unigene17909_Taxus	343	1203	108.77	358.41	1.72033	0	0	-	-	-	gi|116309823|emb|CAH66860.1|/2e-08/H0307D04.5 [Oryza sativa (indica cultivar-group)]
Unigene21336_Taxus	28	98	8.88	29.2	1.71734	1.52332e-09	1.44504e-08	-	-	-	gi|195651705|gb|ACG45320.1|/6e-08/threonine endopeptidase [Zea mays]
Unigene21139_Taxus	89	311	28.22	92.66	1.71523	0	0	-	-	-	gi|261188864|ref|XP_002620845.1|/1e-73/AMP-binding enzyme [Ajellomyces dermatitidis SLH14081] >gi|239591987|gb|EEQ74568.1| AMP-binding enzyme [Ajellomyces dermatitidis SLH14081] >gi|239615324|gb|EEQ92311.1| AMP-binding enzyme [Ajellomyces dermatitidis ER-3]
Unigene18392_Taxus	12	42	3.81	12.51	1.71522	8.68654e-05	0.000383616	-	-	-	gi|226494211|ref|NP_001148261.1|/1e-07/GDU1 [Zea mays] >gi|195617010|gb|ACG30335.1| GDU1 [Zea mays]
Unigene18673_Taxus	49	171	15.54	50.95	1.7131	5.10702e-15	9.06191e-14	-	-	-	gi|11467470|ref|NP_043616.1|/4e-33/ribosomal protein L4 [Odontella sinensis] >gi|1350651|sp|P49546.1|RK4_ODOSI RecName: Full=50S ribosomal protein L4, chloroplastic >gi|1185165|emb|CAA91648.1| 50S ribosomal protein L4 [Odontella sinensis]
Unigene23210_Taxus	150	523	47.57	155.82	1.71176	0	0	-	-	-	-
Unigene35071_Taxus	74	258	23.47	76.87	1.7116	0	0	-	-	-	gi|226504516|ref|NP_001147472.1|/2e-32/potassium transporter 10 [Zea mays] >gi|195611632|gb|ACG27646.1| potassium transporter 10 [Zea mays]
Unigene28966_Taxus	17	59	5.39	17.58	1.70558	3.3722e-06	1.97228e-05	-	-	-	-
Unigene7893_Taxus	17	59	5.39	17.58	1.70558	3.3722e-06	1.97164e-05	-	-	-	gi|108951289|gb|ABG25038.1|/3e-08/nitric oxide synthase [Arabidopsis thaliana]
Unigene4879_Taxus	19	66	6.03	19.66	1.70503	8.55208e-07	5.58692e-06	GO:0009536//plastid;GO:0016020//membrane	-	-	gi|141332|sp|P15811.1|YCF49_CYAPA/8e-07/RecName: Full=Uncharacterized protein ycf49; AltName: Full=ORF102 >gi|1016145|gb|AAA81232.1| orf102 [Cyanophora paradoxa]
Unigene6518_Taxus	15	52	4.76	15.49	1.7023	1.33799e-05	7.03553e-05	-	-	-	gi|116056665|emb|CAL52954.1|/4e-07/Arp2/3 complex-interacting protein VIP1/Asp1, involved in regulation of actin cytoskeleton (ISS) [Ostreococcus tauri]
Unigene1853_Taxus	33	114	10.46	33.96	1.69895	9.69762e-11	1.05408e-09	-	-	-	gi|15223391|ref|NP_174585.1|/1e-126/MATE efflux family protein [Arabidopsis thaliana]
Unigene3605_Taxus	11	38	3.49	11.32	1.69758	0.000216246	0.000877745	-	-	-	gi|116781433|gb|ABK22098.1|/2e-31/unknown [Picea sitchensis]
Unigene34034_Taxus	11	38	3.49	11.32	1.69758	0.000216246	0.000877545	-	-	-	gi|79515670|ref|NP_197295.2|/2e-15/binding / protein binding [Arabidopsis thaliana]
Unigene14865_Taxus	16	55	5.07	16.39	1.69276	8.27734e-06	4.51918e-05	-	-	-	-
Unigene36237_Taxus	16	55	5.07	16.39	1.69276	8.27734e-06	4.51779e-05	-	-	-	gi|116055753|emb|CAL57838.1|/9e-18/OJ1076_H08.5 gene product (ISS) [Ostreococcus tauri]
Unigene8593_Taxus	23	79	7.29	23.54	1.69112	8.45734e-08	6.50832e-07	-	-	-	gi|44917535|gb|AAS49092.1|/5e-17/At2g01755 [Arabidopsis thaliana]
Unigene8645_Taxus	23	79	7.29	23.54	1.69112	8.45734e-08	6.50551e-07	-	-	-	gi|115448753|ref|NP_001048156.1|/1e-29/Os02g0754600 [Oryza sativa (japonica cultivar-group)] >gi|113537687|dbj|BAF10070.1| Os02g0754600 [Oryza sativa Japonica Group]
Unigene32590_Taxus	197	677	62.47	201.7	1.69098	0	0	-	-	-	gi|15239081|ref|NP_196715.1|/3e-10/FAD-binding domain-containing protein [Arabidopsis thaliana]
Unigene30245_Taxus	14	48	4.44	14.3	1.68738	3.29862e-05	0.000161265	-	-	-	gi|159488495|ref|XP_001702245.1|/1e-10/plastid lipid associated protein [Chlamydomonas reinhardtii] >gi|158271282|gb|EDO97105.1| plastid lipid associated protein [Chlamydomonas reinhardtii]
Unigene26214_Taxus	143	489	45.35	145.69	1.68373	0	0	-	-	-	-
Unigene8694_Taxus	17	58	5.39	17.28	1.68075	5.123e-06	2.89642e-05	-	-	-	gi|115441075|ref|NP_001044817.1|/3e-11/Os01g0850900 [Oryza sativa (japonica cultivar-group)] >gi|20805177|dbj|BAB92846.1| SOUL heme-binding protein-like [Oryza sativa Japonica Group] >gi|113534348|dbj|BAF06731.1| Os01g0850900 [Oryza sativa Japonica Group]
Unigene12248_Taxus	17	58	5.39	17.28	1.68075	5.123e-06	2.8955e-05	GO:0016023//cytoplasmic membrane-bounded vesicle	-	GO:0010200//response to chitin	gi|255671228|dbj|BAF09923.2|/3e-11/Os02g0729900 [Oryza sativa Japonica Group]
Unigene18463_Taxus	12	41	3.81	12.21	1.6802	0.000132674	0.00056316	-	-	-	-
Unigene15254_Taxus	12	41	3.81	12.21	1.6802	0.000132674	0.000563026	-	-	-	gi|115475041|ref|NP_001061117.1|/2e-07/Os08g0176200 [Oryza sativa (japonica cultivar-group)]
Unigene35087_Taxus	78	266	24.73	79.25	1.68015	0	0	-	-	-	-
Unigene36379_Taxus	59	201	18.71	59.88	1.67826	0	0	-	GO:0051536//iron-sulfur cluster binding	GO:0016226//iron-sulfur cluster assembly	gi|21554503|gb|AAM63593.1|/4e-18/nitrogen fixation like protein [Arabidopsis thaliana]
Unigene19581_Taxus	42	143	13.32	42.6	1.67726	7.12542e-13	9.77208e-12	-	-	-	gi|159482850|ref|XP_001699478.1|/5e-08/pyridine nucleotide binding protein [Chlamydomonas reinhardtii] >gi|158272745|gb|EDO98541.1| pyridine nucleotide binding protein [Chlamydomonas reinhardtii]
Unigene20201_Taxus	374	1273	118.6	379.26	1.67708	2.17604e-13	3.18801e-12	GO:0005886//plasma membrane	GO:0048032;GO:0003677//DNA binding	GO:0007267//cell-cell signaling	gi|79458120|ref|NP_191976.2|/2e-19/DNA binding [Arabidopsis thaliana] >gi|48310044|gb|AAT41742.1| At4g00670 [Arabidopsis thaliana] >gi|54606860|gb|AAV34778.1| At4g00670 [Arabidopsis thaliana]
Unigene9507_Taxus	56	190	17.76	56.61	1.67243	0	0	-	-	-	gi|212007818|gb|ACJ22504.1|/7e-79/cell division AAA ATPase family protein [Triticum aestivum]
Unigene10600_Taxus	13	44	4.12	13.11	1.66995	8.14904e-05	0.000362213	-	-	-	-
Unigene19917_Taxus	24	81	7.61	24.13	1.66486	7.96056e-08	6.13928e-07	-	-	-	gi|116055769|emb|CAL57854.1|/7e-15/Mitochondrial Fe-S cluster biosynthesis protein ISA2 (contains a HesB-like domain) (ISS) [Ostreococcus tauri]
Unigene12119_Taxus	57	192	18.08	57.2	1.66162	6.88338e-15	1.20578e-13	-	-	-	gi|20453122|gb|AAM19803.1|/6e-41/At1g74320/F1O17_1 [Arabidopsis thaliana] >gi|30984574|gb|AAP42750.1| At1g74320 [Arabidopsis thaliana]
Unigene36162_Taxus	33	111	10.46	33.07	1.66064	3.32564e-10	3.40888e-09	-	-	-	gi|119358800|emb|CAL52078.2|/4e-35/Ccd-Arp undefined product (IC) [Ostreococcus tauri]
Unigene23067_Taxus	88	296	27.91	88.19	1.65983	0	0	-	-	-	-
Unigene26104_Taxus	22	74	6.98	22.05	1.65948	3.10752e-07	2.17869e-06	-	-	-	gi|1350526|gb|AAB01565.1|/2e-15/glycine-rich cell wall protein [Picea glauca]
Unigene12607_Taxus	42	141	13.32	42.01	1.65714	1.51457e-12	1.98689e-11	-	-	-	gi|238879680|gb|EEQ43318.1|/1e-75/histone deacetylase HDA1 [Candida albicans WO-1]
Unigene26708_Taxus	42	141	13.32	42.01	1.65714	1.51457e-12	1.98543e-11	-	-	-	-
Unigene15041_Taxus	14	47	4.44	14	1.6568	5.01052e-05	0.000234408	-	-	-	-
Unigene17526_Taxus	17	57	5.39	16.98	1.65548	7.75918e-06	4.25192e-05	-	-	-	gi|95113964|gb|ABF55516.1|/3e-08/chloroplast At1g16080 protein [Helianthus annuus]
Unigene20370_Taxus	23	77	7.29	22.94	1.65387	1.93069e-07	1.39932e-06	-	-	-	gi|12655933|gb|AAK00662.1|AF229390_1/1e-93/omega 6 reductase [Brassica rapa]
Unigene30256_Taxus	91	304	28.86	90.57	1.64996	0	0	-	-	-	-
Unigene36122_Taxus	68	227	21.56	67.63	1.64931	0	0	-	-	-	gi|38346117|emb|CAE04595.2|/2e-52/OSJNBb0006N15.12 [Oryza sativa (japonica cultivar-group)]
Unigene19510_Taxus	54	180	17.12	53.63	1.64736	0	0	-	-	-	gi|115466388|ref|NP_001056793.1|/3e-65/Os06g0146300 [Oryza sativa (japonica cultivar-group)] >gi|113594833|dbj|BAF18707.1| Os06g0146300 [Oryza sativa Japonica Group]
Unigene23671_Taxus	195	648	61.84	193.06	1.64244	9.79216e-14	1.50256e-12	-	-	-	-
Unigene11898_Taxus	93	309	29.49	92.06	1.64235	0	0	-	-	-	gi|15281586|gb|AAK94322.1|/8e-06/histone-like protein [Fritillaria liliacea]
Unigene12993_Taxus	79	262	25.05	78.06	1.63977	0	0	-	-	-	gi|45720180|emb|CAG14981.1|/2e-77/C2 domain-containing protein [Cicer arietinum]
Unigene13553_Taxus	16	53	5.07	15.79	1.63895	1.89974e-05	9.68351e-05	-	-	-	-
Unigene18973_Taxus	13	43	4.12	12.81	1.63655	0.000123595	0.000528909	-	-	-	-
Unigene16147_Taxus	33	109	10.46	32.47	1.63422	7.50092e-10	7.42795e-09	-	-	-	-
Unigene1213_Taxus	174	574	55.18	171.01	1.63186	3.13082e-14	5.19809e-13	-	-	-	gi|226461167|gb|EEH58460.1|/2e-12/voltage-gated ion channel superfamily [Micromonas pusilla CCMP1545]
Unigene21245_Taxus	67	221	21.25	65.84	1.6315	0	0	-	-	-	gi|73697834|gb|AAZ81521.1|/1e-152/auxin response factor 1 [Gossypium barbadense]
Unigene2350_Taxus	24	79	7.61	23.54	1.62915	1.80408e-07	1.31183e-06	-	-	-	-
Unigene20223_Taxus	89	292	28.22	86.99	1.62413	0	0	GO:0000145//exocyst	-	GO:0009846//pollen germination;GO:0009860//pollen tube growth	gi|21542231|sp|O75006.1|SEC15_SCHPO/4e-36/RecName: Full=Exocyst complex component sec15
Unigene15920_Taxus	433	1419	137.31	422.76	1.6224	9.88098e-13	1.33154e-11	-	-	-	-
Unigene14590_Taxus	18	59	5.71	17.58	1.62237	7.2277e-06	4.00502e-05	-	GO:0003873//6-phosphofructo-2-kinase activity;GO:0030246//carbohydrate binding;GO:0016787//hydrolase activity;GO:0005524//ATP binding	GO:0006003//fructose 2,6-bisphosphate metabolic process	gi|70986887|ref|XP_748930.1|/3e-92/fructose-2,6-bisphosphatase [Aspergillus fumigatus Af293] >gi|66846560|gb|EAL86892.1| fructose-2,6-bisphosphatase [Aspergillus fumigatus Af293] >gi|159123301|gb|EDP48421.1| fructose-2,6-bisphosphatase [Aspergillus fumigatus A1163]
Unigene23336_Taxus	33	108	10.46	32.18	1.62128	1.12335e-09	1.08528e-08	-	-	-	gi|195643386|gb|ACG41161.1|/5e-06/zinc finger C-x8-C-x5-C-x3-H type family protein [Zea mays]
Unigene18436_Taxus	41	134	13	39.92	1.6186	1.16773e-11	1.39338e-10	-	-	-	gi|38344482|emb|CAE05497.2|/4e-27/OSJNBa0022H21.17 [Oryza sativa (japonica cultivar-group)] >gi|255675552|dbj|BAF14991.2| Os04g0476000 [Oryza sativa Japonica Group]
Unigene18543_Taxus	31	101	9.83	30.09	1.61402	4.32868e-09	3.9026e-08	-	-	-	-
Unigene36287_Taxus	20	65	6.34	19.37	1.61127	2.75808e-06	1.62969e-05	-	-	-	gi|154359306|gb|ABS79675.1|/2e-17/At5g30510-like protein [Arabidopsis halleri subsp. halleri]
Unigene12580_Taxus	48	156	15.22	46.48	1.61064	3.60822e-13	5.09758e-12	-	-	-	gi|149391227|gb|ABR25631.1|/7e-06/crs1/yhby domain containing protein [Oryza sativa Indica Group]
Unigene31493_Taxus	181	587	57.4	174.88	1.60724	4.21884e-14	6.94627e-13	-	-	-	gi|195605652|gb|ACG24656.1|/1e-13/16.9 kDa class I heat shock protein 1 [Zea mays]
Unigene12144_Taxus	30	97	9.51	28.9	1.60355	1.0394e-08	8.94533e-08	-	-	-	-
Unigene524_Taxus	26	84	8.24	25.03	1.60294	1.04151e-07	7.86874e-07	-	-	-	gi|115434566|ref|NP_001042041.1|/1e-49/Os01g0151600 [Oryza sativa (japonica cultivar-group)] >gi|113531572|dbj|BAF03955.1| Os01g0151600 [Oryza sativa Japonica Group]
Unigene33354_Taxus	13	42	4.12	12.51	1.60237	0.000186633	0.000767513	-	GO:0005488//binding	-	gi|30685903|ref|NP_851041.1|/8e-06/ZFN3 (ZINC FINGER NUCLEASE 3); DNA binding / nuclease/ nucleic acid binding [Arabidopsis thaliana] >gi|62901381|sp|Q8L7N8.2|C3H57_ARATH RecName: Full=Zinc finger CCCH domain-containing protein 57; Short=AtC3H57; AltName: Full=Zinc finger type domain-containing protein ZFN3
Unigene16691_Taxus	48	155	15.22	46.18	1.6013	5.02486e-13	6.98812e-12	GO:0009535//chloroplast thylakoid membrane	-	GO:0006979//response to oxidative stress	gi|115442003|ref|NP_001045281.1|/7e-42/Os01g0929100 [Oryza sativa (japonica cultivar-group)] >gi|113534812|dbj|BAF07195.1| Os01g0929100 [Oryza sativa Japonica Group]
Unigene30118_Taxus	23	74	7.29	22.05	1.59679	6.53274e-07	4.34095e-06	-	-	-	-
Unigene23143_Taxus	23	74	7.29	22.05	1.59679	6.53274e-07	4.33933e-06	-	-	-	-
Unigene8883_Taxus	23	74	7.29	22.05	1.59679	6.53274e-07	4.33771e-06	-	-	-	gi|115442091|ref|NP_001045325.1|/3e-21/Os01g0936000 [Oryza sativa (japonica cultivar-group)]
Unigene35915_Taxus	47	151	14.9	44.99	1.59429	9.75442e-13	1.31748e-11	-	-	-	gi|15239113|ref|NP_196720.1|/6e-38/TINY2 (TINY2); DNA binding / transcription factor [Arabidopsis thaliana] >gi|75264381|sp|Q9LYD3.1|DREB3_ARATH RecName: Full=Dehydration-responsive element-binding protein 3; AltName: Full=Protein TINY 2 >gi|7573416|emb|CAB87719.1| transcription factor like protein [Arabidopsis thaliana] >gi|61104875|gb|AAX38232.1| DREB3 [Arabidopsis thaliana]
Unigene12359_Taxus	28	90	8.88	26.81	1.59414	4.01562e-08	3.2181e-07	GO:0005737//cytoplasm	GO:0004427//inorganic diphosphatase activity;GO:0000287//magnesium ion binding	GO:0006796//phosphate metabolic process	gi|226502202|ref|NP_001148294.1|/8e-92/soluble inorganic pyrophosphatase [Zea mays] >gi|195617204|gb|ACG30432.1| soluble inorganic pyrophosphatase [Zea mays]
Unigene26035_Taxus	404	1298	128.11	386.71	1.59387	0	0	-	-	-	gi|57116679|gb|AAW33814.1|/2e-24/sorbitol dehydrogenase [Malus x domestica]
Unigene22742_Taxus	24	77	7.61	22.94	1.5919	4.04648e-07	2.77903e-06	-	-	-	-
Unigene34553_Taxus	50	160	15.86	47.67	1.58769	2.48024e-13	3.6011e-12	-	-	-	-
Unigene117_Taxus	50	160	15.86	47.67	1.58769	2.48024e-13	3.59817e-12	-	-	-	-
Unigene32834_Taxus	25	80	7.93	23.83	1.58739	2.5077e-07	1.77562e-06	-	-	-	gi|195621444|gb|ACG32552.1|/7e-16/FHA domain containing protein [Zea mays]
Unigene20507_Taxus	15	48	4.76	14.3	1.58698	7.00142e-05	0.000317622	-	-	-	gi|115452417|ref|NP_001049809.1|/2e-18/Os03g0293100 [Oryza sativa (japonica cultivar-group)] >gi|113548280|dbj|BAF11723.1| Os03g0293100 [Oryza sativa Japonica Group]
Unigene8599_Taxus	26	83	8.24	24.73	1.58555	1.55482e-07	1.14554e-06	-	-	-	gi|15238041|ref|NP_199533.1|/2e-33/ERF2 (ETHYLENE RESPONSIVE ELEMENT BINDING FACTOR 2); DNA binding / transcription activator/ transcription factor [Arabidopsis thaliana] >gi|7531108|sp|O80338.1|EF101_ARATH RecName: Full=Ethylene-responsive transcription factor 2; Short=AtERF2; AltName: Full=Ethylene-responsive element-binding factor 2; Short=EREBP-2 >gi|3434969|dbj|BAA32419.1| ethylene responsiv…
Unigene36246_Taxus	90	287	28.54	85.5	1.58294	0	0	-	-	-	gi|75291915|sp|Q6S5G3.1|TOC90_ARATH/1e-117/RecName: Full=Translocase of chloroplast 90, chloroplastic; Short=AtToc90; AltName: Full=90 kDa chloroplast outer envelope protein; AltName: Full=Plastid protein import 4 >gi|42718957|gb|AAS38569.1| chloroplast import receptor Toc90 [Arabidopsis thaliana]
Unigene35101_Taxus	33	105	10.46	31.28	1.58036	3.72834e-09	3.37673e-08	-	-	-	gi|259480992|tpe|CBF74123.1|/5e-10/TPA: tRNA-guanine transglycosylase family protein (AFU_orthologue; AFUA_5G03470) [Aspergillus nidulans FGSC A4]
Unigene13181_Taxus	33	105	10.46	31.28	1.58036	3.72834e-09	3.37502e-08	-	-	-	gi|115487698|ref|NP_001066336.1|/6e-37/Os12g0189700 [Oryza sativa (japonica cultivar-group)] >gi|77553230|gb|ABA96026.1| expressed protein [Oryza sativa (japonica cultivar-group)] >gi|113648843|dbj|BAF29355.1| Os12g0189700 [Oryza sativa Japonica Group]
Unigene19324_Taxus	33	105	10.46	31.28	1.58036	3.72834e-09	3.37331e-08	-	-	-	gi|115457354|ref|NP_001052277.1|/3e-06/Os04g0224600 [Oryza sativa (japonica cultivar-group)] >gi|38344128|emb|CAE01764.2| OSJNBb0072N21.7 [Oryza sativa (japonica cultivar-group)] >gi|113563848|dbj|BAF14191.1| Os04g0224600 [Oryza sativa Japonica Group]
Unigene12185_Taxus	17	54	5.39	16.09	1.57781	2.6409e-05	0.000131418	GO:0005634//nucleus	GO:0003700//sequence-specific DNA binding transcription factor activity	GO:0006355//regulation of transcription, DNA-dependent	gi|57012875|sp|Q9LW49.1|ERF4_NICSY/1e-19/RecName: Full=Ethylene-responsive transcription factor 4; AltName: Full=Ethylene-responsive element-binding factor 4 homolog; AltName: Full=Ethylene-responsive element-binding factor 3; Short=EREBP-3; AltName: Full=NsERF3 >gi|8809573|dbj|BAA97123.1| ethylene-responsive element binding factor [Nicotiana sylvestris]
Unigene12169_Taxus	17	54	5.39	16.09	1.57781	2.6409e-05	0.000131381	-	-	-	gi|116059595|emb|CAL55302.1|/1e-58/Tab2 protein (ISS) [Ostreococcus tauri]
Unigene3035_Taxus	109	346	34.56	103.08	1.57659	0	0	-	-	-	gi|115456387|ref|NP_001051794.1|/9e-06/Os03g0831400 [Oryza sativa (japonica cultivar-group)] >gi|108711914|gb|ABF99709.1| expressed protein [Oryza sativa (japonica cultivar-group)] >gi|113550265|dbj|BAF13708.1| Os03g0831400 [Oryza sativa Japonica Group]
Unigene33012_Taxus	93	295	29.49	87.89	1.57547	0	0	-	-	-	gi|20257711|gb|AAM16021.1|/3e-13/glycine-rich RNA binding protein [Zea mays]
Unigene5066_Taxus	39	123	12.37	36.64	1.56657	2.1719e-10	2.27335e-09	-	-	-	-
Unigene6077_Taxus	33	104	10.46	30.98	1.56645	5.53834e-09	4.91852e-08	-	-	-	gi|115489720|ref|NP_001067347.1|/1e-43/Os12g0632800 [Oryza sativa (japonica cultivar-group)]
Unigene33160_Taxus	181	570	57.4	169.82	1.56488	4.21884e-14	6.9527e-13	-	-	-	gi|15232407|ref|NP_190972.1|/1e-31/photoassimilate-responsive protein-related [Arabidopsis thaliana] >gi|7630024|emb|CAB88366.1| photoassimilate-responsive protein PAR-1b-like protein [Arabidopsis thaliana] >gi|18252939|gb|AAL62396.1| photoassimilate-responsive protein PAR-1b -like protein [Arabidopsis thaliana] >gi|21389647|gb|AAM48022.1| photoassimilate-responsive protein PAR-1b-like protein [A…
Unigene1641_Taxus	21	66	6.66	19.66	1.56167	3.80528e-06	2.19958e-05	-	-	-	gi|225683784|gb|EEH22068.1|/2e-23/retinol dehydrogenase [Paracoccidioides brasiliensis Pb03]
Unigene35858_Taxus	56	175	17.76	52.14	1.55376	9.54792e-15	1.65302e-13	-	-	-	gi|213403952|ref|XP_002172748.1|/2e-06/small glutamine-rich tetratricopeptide repeat-containing protein B [Schizosaccharomyces japonicus yFS275] >gi|212000795|gb|EEB06455.1| small glutamine-rich tetratricopeptide repeat-containing protein B [Schizosaccharomyces japonicus yFS275]
Unigene20868_Taxus	24	75	7.61	22.34	1.55366	8.97614e-07	5.85751e-06	-	-	-	gi|119194721|ref|XP_001247964.1|/3e-64/mitochondrial RNA splicing protein [Coccidioides immitis RS]
Unigene31411_Taxus	57	178	18.08	53.03	1.55241	3.68594e-14	6.09703e-13	-	-	-	gi|116788367|gb|ABK24854.1|/3e-08/unknown [Picea sitchensis]
Unigene22516_Taxus	17	53	5.39	15.79	1.55065	3.94302e-05	0.000188274	-	-	-	-
Unigene10852_Taxus	37	115	11.73	34.26	1.54632	1.22744e-09	1.17881e-08	-	-	-	gi|6093671|sp|P22195.2|PER1_ARAHY/1e-103/RecName: Full=Cationic peroxidase 1; AltName: Full=PNPC1; Flags: Precursor >gi|1491776|gb|AAB06183.1| cationic peroxidase [Arachis hypogaea]
Unigene31077_Taxus	103	319	32.66	95.04	1.54101	0	0	-	-	-	-
Unigene36214_Taxus	101	312	32.03	92.95	1.53703	0	0	-	-	-	gi|18395060|ref|NP_564154.1|/1e-129/DD46; galactosyltransferase/ transferase, transferring hexosyl groups [Arabidopsis thaliana] >gi|75174713|sp|Q9LM60.1|B3GT5_ARATH RecName: Full=Probable beta-1,3-galactosyltransferase 5 >gi|9280694|gb|AAF86563.1|AC069252_22 F2E2.6 [Arabidopsis thaliana]
Unigene20151_Taxus	45	139	14.27	41.41	1.53699	2.77658e-11	3.21618e-10	-	-	-	gi|115475617|ref|NP_001061405.1|/9e-64/Os08g0266600 [Oryza sativa (japonica cultivar-group)] >gi|113623374|dbj|BAF23319.1| Os08g0266600 [Oryza sativa Japonica Group]
Unigene16623_Taxus	36	111	11.42	33.07	1.53396	2.91444e-09	2.67771e-08	-	-	-	gi|116793491|gb|ABK26767.1|/2e-12/unknown [Picea sitchensis]
Unigene17687_Taxus	50	154	15.86	45.88	1.53247	2.6179e-12	3.3289e-11	-	-	-	gi|6630456|gb|AAF19544.1|AC007190_12/7e-29/F23N19.15 [Arabidopsis thaliana]
Unigene9592_Taxus	67	206	21.25	61.37	1.53007	0	0	-	-	-	-
Unigene28399_Taxus	87	267	27.59	79.55	1.52772	0	0	-	-	-	-
Unigene4440_Taxus	30	92	9.51	27.41	1.52719	7.49944e-08	5.79872e-07	-	-	-	gi|195536980|dbj|BAG68210.1|/8e-15/lectin receptor kinase-like protein [Nicotiana benthamiana]
Unigene34837_Taxus	130	398	41.22	118.57	1.52432	0	0	-	-	-	gi|116792237|gb|ABK26285.1|/2e-79/unknown [Picea sitchensis]
Unigene26597_Taxus	98	300	31.08	89.38	1.52397	0	0	-	-	-	-
Unigene12226_Taxus	45	137	14.27	40.82	1.51629	6.0153e-11	6.6768e-10	-	-	-	gi|49643429|emb|CAG99381.1|/5e-06/KLLA0E07657p [Kluyveromyces lactis]
Unigene33545_Taxus	96	292	30.44	86.99	1.51488	0	0	-	-	-	gi|149391754|gb|ABR25827.1|/3e-14/hydrolase [Oryza sativa Indica Group]
Unigene13348_Taxus	26	79	8.24	23.54	1.5144	7.519e-07	4.94832e-06	-	-	-	-
Unigene32546_Taxus	53	161	16.81	47.97	1.51281	1.36979e-12	1.80762e-11	-	-	-	gi|86439697|emb|CAJ19327.1|/1e-08/mechanosensitive ion channel [Triticum aestivum]
Unigene18268_Taxus	30	91	9.51	27.11	1.51131	1.10547e-07	8.33433e-07	-	-	-	gi|189195980|ref|XP_001934328.1|/3e-06/DOLPP1 protein [Pyrenophora tritici-repentis Pt-1C-BFP] >gi|187980207|gb|EDU46833.1| DOLPP1 protein [Pyrenophora tritici-repentis Pt-1C-BFP]
Unigene6689_Taxus	57	173	18.08	51.54	1.5113	2.15162e-13	3.15742e-12	-	-	-	gi|194476884|ref|YP_002049063.1|/4e-12/DnaJ protein [Paulinella chromatophora] >gi|171191891|gb|ACB42853.1| DnaJ protein [Paulinella chromatophora]
Unigene13008_Taxus	35	106	11.1	31.58	1.50845	1.01724e-08	8.7631e-08	-	-	-	gi|159488863|ref|XP_001702420.1|/1e-127/plastid division protein [Chlamydomonas reinhardtii] >gi|158271088|gb|EDO96915.1| plastid division protein [Chlamydomonas reinhardtii]
Unigene9326_Taxus	81	245	25.69	72.99	1.50649	1.17684e-14	2.0101e-13	-	-	-	-
Unigene3503_Taxus	84	254	26.64	75.67	1.50613	0	0	-	-	-	gi|255678893|dbj|BAH94562.1|/2e-10/Os09g0411650 [Oryza sativa Japonica Group]
Unigene35289_Taxus	140	423	44.39	126.02	1.50535	0	0	-	-	-	gi|1167484|emb|CAA64614.1|/2e-63/transcription factor [Solanum lycopersicum]
Unigene24150_Taxus	229	690	72.62	205.57	1.50119	1.15019e-13	1.74686e-12	-	-	GO:0009451//RNA modification	gi|145049690|gb|ABP35526.1|/1e-13/CCR4-associated factor [Ipomoea batatas]
Unigene4070_Taxus	127	382	40.27	113.81	1.49885	4.86278e-14	7.85407e-13	-	-	-	gi|255076279|ref|XP_002501814.1|/4e-36/carbohydrate-binding module family 45 protein [Micromonas sp. RCC299] >gi|226517078|gb|ACO63072.1| carbohydrate-binding module family 45 protein [Micromonas sp. RCC299]
Unigene19533_Taxus	368	1106	116.7	329.51	1.49752	0	0	-	-	-	-
Unigene23681_Taxus	223	670	70.71	199.61	1.4972	0	0	-	-	-	gi|116779169|gb|ABK21166.1|/6e-16/unknown [Picea sitchensis]
Unigene17917_Taxus	16	48	5.07	14.3	1.49596	0.000141822	0.000599849	-	-	-	-
Unigene20486_Taxus	111	333	35.2	99.21	1.49491	0	0	GO:0005886//plasma membrane	-	-	gi|2564066|dbj|BAA22940.1|/3e-65/LEDI-3 protein [Lithospermum erythrorhizon]
Unigene25204_Taxus	129	387	40.91	115.3	1.49487	0	0	-	-	-	-
Unigene9171_Taxus	21	63	6.66	18.77	1.49483	1.2374e-05	6.56079e-05	-	-	-	-
Unigene10779_Taxus	18	54	5.71	16.09	1.4946	5.32574e-05	0.000248177	-	-	-	gi|226503461|ref|NP_001149624.1|/3e-65/methionine aminopeptidase 1A [Zea mays] >gi|195628586|gb|ACG36123.1| methionine aminopeptidase 1A [Zea mays]
Unigene5053_Taxus	22	66	6.98	19.66	1.49396	7.62312e-06	4.18637e-05	-	-	-	gi|126567171|gb|ABO20998.1|/5e-10/anther-specific proline rich protein [Brassica rapa subsp. rapa]
Unigene19544_Taxus	170	509	53.91	151.64	1.49203	2.69784e-13	3.86661e-12	-	-	-	-
Unigene27555_Taxus	45	134	14.27	39.92	1.48413	1.89312e-10	1.9909e-09	-	-	-	-
Unigene31261_Taxus	74	220	23.47	65.54	1.48156	0	0	-	-	-	-
Unigene35251_Taxus	30	89	9.51	26.52	1.47956	2.38396e-07	1.69339e-06	-	-	-	-
Unigene34100_Taxus	54	160	17.12	47.67	1.4774	3.91708e-12	4.92816e-11	-	-	-	gi|108712240|gb|ABG00035.1|/1e-12/expressed protein [Oryza sativa (japonica cultivar-group)]
Unigene16753_Taxus	27	80	8.56	23.83	1.4771	1.00515e-06	6.49739e-06	-	-	-	-
Unigene4292_Taxus	23	68	7.29	20.26	1.47464	6.90956e-06	3.83112e-05	-	-	-	gi|15232407|ref|NP_190972.1|/1e-25/photoassimilate-responsive protein-related [Arabidopsis thaliana] >gi|7630024|emb|CAB88366.1| photoassimilate-responsive protein PAR-1b-like protein [Arabidopsis thaliana] >gi|18252939|gb|AAL62396.1| photoassimilate-responsive protein PAR-1b -like protein [Arabidopsis thaliana] >gi|21389647|gb|AAM48022.1| photoassimilate-responsive protein PAR-1b-like protein [A…
Unigene26193_Taxus	65	192	20.61	57.2	1.47267	0	0	-	-	-	-
Unigene20909_Taxus	18	53	5.71	15.79	1.46745	7.84878e-05	0.00034974	-	-	-	gi|115444875|ref|NP_001046217.1|/8e-09/Os02g0199800 [Oryza sativa (japonica cultivar-group)] >gi|113535748|dbj|BAF08131.1| Os02g0199800 [Oryza sativa Japonica Group]
Unigene7174_Taxus	18	53	5.71	15.79	1.46745	7.84878e-05	0.000349652	-	-	-	gi|168009652|ref|XP_001757519.1|/9e-06/predicted protein [Physcomitrella patens subsp. patens] >gi|162691213|gb|EDQ77576.1| predicted protein [Physcomitrella patens subsp. patens]
Unigene12051_Taxus	36	106	11.42	31.58	1.46745	1.98597e-08	1.64865e-07	-	-	-	gi|115450437|ref|NP_001048819.1|/8e-06/Os03g0125700 [Oryza sativa (japonica cultivar-group)] >gi|108705952|gb|ABF93747.1| expressed protein [Oryza sativa (japonica cultivar-group)] >gi|113547290|dbj|BAF10733.1| Os03g0125700 [Oryza sativa Japonica Group]
Unigene29896_Taxus	17	50	5.39	14.9	1.46696	0.000128074	0.000547416	-	-	-	-
Unigene26660_Taxus	48	141	15.22	42.01	1.46476	9.74582e-11	1.05867e-09	-	-	-	-
Unigene26319_Taxus	195	571	61.84	170.12	1.45994	9.79216e-14	1.50127e-12	-	-	-	-
Unigene2737_Taxus	203	594	64.37	176.97	1.45904	9.79216e-14	1.50515e-12	-	-	-	gi|18376030|emb|CAB91764.2|/4e-89/related to pyruvate dehydrogenase kinase isoform 2, mitochondrial [Neurospora crassa]
Unigene36381_Taxus	115	336	36.47	100.1	1.45666	0	0	-	-	-	gi|116056495|emb|CAL52784.1|/7e-07/Putative fructose-6-phosphate aldolase (ISS) [Ostreococcus tauri]
Unigene15729_Taxus	148	432	46.93	128.7	1.45543	0	0	-	-	-	-
Unigene8682_Taxus	245	714	77.69	212.72	1.45315	2.1494e-13	3.15677e-12	-	-	-	gi|225430500|ref|XP_002285546.1|/2e-10/PREDICTED: hypothetical protein [Vitis vinifera] >gi|270231823|emb|CBI21148.1| unnamed protein product [Vitis vinifera]
Unigene19517_Taxus	90	262	28.54	78.06	1.4516	0	0	-	-	-	gi|9972370|gb|AAG10620.1|AC008030_20/3e-17/Putative receptor-like serine/threonine kinase [Arabidopsis thaliana]
Unigene3422_Taxus	39	113	12.37	33.67	1.44462	1.01075e-08	8.71564e-08	-	-	-	gi|74602185|sp|Q6BQJ1.1|TVP38_DEBHA/1e-05/RecName: Full=Golgi apparatus membrane protein TVP38 >gi|49655197|emb|CAG87756.1| DEHA2E04840p [Debaryomyces hansenii]
Unigene34302_Taxus	97	281	30.76	83.72	1.44452	3.10862e-15	5.63378e-14	-	-	-	gi|14517430|gb|AAK62605.1|/6e-41/AT3g17930/MEB5_15 [Arabidopsis thaliana] >gi|20147323|gb|AAM10375.1| AT3g17930/MEB5_15 [Arabidopsis thaliana]
Unigene8249_Taxus	48	139	15.22	41.41	1.44401	2.05876e-10	2.15619e-09	-	-	-	gi|226493860|ref|NP_001151935.1|/1e-05/calmodulin binding protein [Zea mays] >gi|195651211|gb|ACG45073.1| calmodulin binding protein [Zea mays]
Unigene2579_Taxus	43	124	13.64	36.94	1.43734	2.1972e-09	2.04403e-08	-	-	-	gi|115466012|ref|NP_001056605.1|/5e-81/Os06g0114600 [Oryza sativa (japonica cultivar-group)] >gi|113594645|dbj|BAF18519.1| Os06g0114600 [Oryza sativa Japonica Group]
Unigene34653_Taxus	42	121	13.32	36.05	1.43641	3.5307e-09	3.20752e-08	-	-	-	gi|115483154|ref|NP_001065170.1|/3e-06/Os10g0536500 [Oryza sativa (japonica cultivar-group)] >gi|31433274|gb|AAP54812.1| expressed protein [Oryza sativa (japonica cultivar-group)] >gi|113639779|dbj|BAF27084.1| Os10g0536500 [Oryza sativa Japonica Group]
Unigene19997_Taxus	33	95	10.46	28.3	1.43592	1.76265e-07	1.28222e-06	-	-	-	gi|240110098|gb|EER28257.1|/1e-20/Histone-like transcription factor and archaeal histone family protein [Coccidioides posadasii C735 delta SOWgp]
Unigene27269_Taxus	99	285	31.39	84.91	1.43563	0	0	-	-	-	-
Unigene31447_Taxus	24	69	7.61	20.56	1.43387	9.1139e-06	4.92013e-05	-	-	-	gi|222840526|gb|ACM68702.1|/4e-51/lycopene beta-cyclase [Brassica rapa subsp. pekinensis]
Unigene33918_Taxus	77	221	24.42	65.84	1.4309	0	0	-	-	-	gi|255673907|dbj|BAH91398.1|/4e-13/Os01g0871350 [Oryza sativa Japonica Group]
Unigene28126_Taxus	46	132	14.59	39.33	1.43065	7.68804e-10	7.59636e-09	-	-	-	-
Unigene15975_Taxus	76	218	24.1	64.95	1.4303	0	0	-	-	-	-
Unigene17038_Taxus	38	109	12.05	32.47	1.43007	2.36096e-08	1.94275e-07	-	-	-	gi|117557353|emb|CAL64987.1|/4e-08/NTMC2Type3.1 protein [Physcomitrella patens]
Unigene32386_Taxus	164	470	52.01	140.03	1.42887	4.75176e-14	7.69569e-13	-	-	-	gi|20197084|gb|AAM14909.1|/9e-08/Expressed protein [Arabidopsis thaliana] >gi|88010859|gb|ABD38864.1| At2g34585 [Arabidopsis thaliana]
Unigene36303_Taxus	43	123	13.64	36.64	1.42558	3.18446e-09	2.91527e-08	-	-	-	gi|255677377|dbj|BAH93713.1|/7e-10/Os06g0705000 [Oryza sativa Japonica Group]
Unigene10030_Taxus	21	60	6.66	17.88	1.42475	3.8978e-05	0.000186314	-	-	-	gi|168002321|ref|XP_001753862.1|/6e-19/predicted protein [Physcomitrella patens subsp. patens] >gi|162694838|gb|EDQ81184.1| predicted protein [Physcomitrella patens subsp. patens]
Unigene20989_Taxus	21	60	6.66	17.88	1.42475	3.8978e-05	0.000186264	-	-	-	gi|288559182|sp|A9S1T8.1|U497A_PHYPA/2e-09/RecName: Full=UPF0497 membrane protein 10
Unigene35079_Taxus	35	100	11.1	29.79	1.42427	9.8515e-08	7.4651e-07	-	-	-	gi|115445727|ref|NP_001046643.1|/7e-17/Os02g0307800 [Oryza sativa (japonica cultivar-group)] >gi|113536174|dbj|BAF08557.1| Os02g0307800 [Oryza sativa Japonica Group]
Unigene1171_Taxus	27	77	8.56	22.94	1.42218	3.12384e-06	1.83425e-05	-	-	-	gi|115469104|ref|NP_001058151.1|/7e-26/Os06g0638200 [Oryza sativa (japonica cultivar-group)] >gi|113596191|dbj|BAF20065.1| Os06g0638200 [Oryza sativa Japonica Group]
Unigene3450_Taxus	27	77	8.56	22.94	1.42218	3.12384e-06	1.83365e-05	-	-	-	gi|269101016|ref|YP_003289164.1|/1e-16/Photosystem II reaction center protein W [Ectocarpus siliculosus] >gi|266631524|emb|CAV31195.1| Photosystem II reaction center protein W [Ectocarpus siliculosus] >gi|270118654|emb|CAT18706.1| Photosystem II reaction center protein W [Ectocarpus siliculosus]
Unigene31818_Taxus	120	342	38.05	101.89	1.42104	0	0	-	-	-	gi|159462702|ref|XP_001689581.1|/7e-08/plastid ribosomal protein L34 [Chlamydomonas reinhardtii] >gi|158283569|gb|EDP09319.1| plastid ribosomal protein L34 [Chlamydomonas reinhardtii]
Unigene36194_Taxus	73	208	23.15	61.97	1.42056	0	0	-	-	-	gi|115476236|ref|NP_001061714.1|/1e-102/Os08g0387500 [Oryza sativa (japonica cultivar-group)]
Unigene35632_Taxus	92	262	29.17	78.06	1.4201	0	0	-	-	-	gi|226505306|ref|NP_001149786.1|/1e-31/RHC1A [Zea mays] >gi|195634655|gb|ACG36796.1| RHC1A [Zea mays]
Unigene19967_Taxus	39	111	12.37	33.07	1.41868	2.1261e-08	1.75761e-07	-	-	-	gi|87162706|gb|ABD28501.1|/3e-90/Zinc finger, C2H2-type [Medicago truncatula]
Unigene30206_Taxus	32	91	10.15	27.11	1.41735	4.12516e-07	2.82979e-06	-	-	-	-
Unigene29952_Taxus	108	307	34.25	91.46	1.41704	0	0	-	-	-	gi|255676350|dbj|BAF17401.2|/2e-41/Os05g0401200 [Oryza sativa Japonica Group]
Unigene16671_Taxus	31	88	9.83	26.22	1.4154	6.65486e-07	4.40894e-06	-	-	-	gi|19074814|ref|NP_586320.1|/1e-11/DNA 3-METHYLADENINE GLYCOSYLASE [Encephalitozoon cuniculi GB-M1] >gi|19173699|ref|NP_597502.1| 3-METHYLADENINE DNA GLYCOSYLASE [Encephalitozoon cuniculi GB-M1] >gi|51701288|sp|Q8SQI1.1|3MG_ENCCU RecName: Full=Probable DNA-3-methyladenine glycosylase; AltName: Full=3-methyladenine DNA glycosidase >gi|19069539|emb|CAD25924.1| DNA 3-METHYLADENINE GLYCOSYLASE [Encep…
Unigene34926_Taxus	24	68	7.61	20.26	1.41267	1.32604e-05	7.00369e-05	-	-	-	-
Unigene31009_Taxus	113	318	35.83	94.74	1.40281	1.74305e-13	2.57697e-12	-	-	-	-
Unigene29870_Taxus	43	121	13.64	36.05	1.40216	6.64952e-09	5.83553e-08	-	-	-	-
Unigene31349_Taxus	48	135	15.22	40.22	1.40194	8.9996e-10	8.81407e-09	-	-	-	-
Unigene17508_Taxus	69	194	21.88	57.8	1.40146	9.76996e-14	1.50434e-12	-	-	-	gi|77024199|gb|ABA55570.1|/2e-27/chloroplast stability factor hcf136 [Pavlova lutheri]
Unigene32439_Taxus	32	90	10.15	26.81	1.40129	5.9709e-07	3.99593e-06	-	-	-	gi|119473819|ref|XP_001258785.1|/9e-06/benzodiazepine receptor family protein [Neosartorya fischeri NRRL 181] >gi|119406938|gb|EAW16888.1| benzodiazepine receptor family protein [Neosartorya fischeri NRRL 181]
Unigene31104_Taxus	21	59	6.66	17.58	1.40034	5.67096e-05	0.000262275	-	-	-	-
Unigene33248_Taxus	47	132	14.9	39.33	1.40032	1.44354e-09	1.37743e-08	GO:0009536//plastid	-	-	gi|115444233|ref|NP_001045896.1|/4e-16/Os02g0149600 [Oryza sativa (japonica cultivar-group)] >gi|113535427|dbj|BAF07810.1| Os02g0149600 [Oryza sativa Japonica Group]
Unigene33537_Taxus	47	132	14.9	39.33	1.40032	1.44354e-09	1.3767e-08	-	-	-	gi|226496173|ref|NP_001152735.1|/5e-06/phytosulfokines 4 [Zea mays] >gi|195659479|gb|ACG49207.1| phytosulfokines 4 precursor [Zea mays]
Unigene18168_Taxus	151	423	47.88	126.02	1.39616	0	0	-	-	-	-
Unigene35816_Taxus	30	84	9.51	25.03	1.39614	1.55418e-06	9.64728e-06	-	-	-	gi|226500602|ref|NP_001148883.1|/1e-21/fiber protein Fb2 [Zea mays] >gi|195622908|gb|ACG33284.1| fiber protein Fb2 [Zea mays]
Unigene16492_Taxus	20	56	6.34	16.68	1.39556	9.22354e-05	0.000406726	-	-	-	gi|116055890|emb|CAL57975.1|/5e-06/ribosomal small subunit pseudouridine synthase A (ISS) [Ostreococcus tauri]
Unigene30233_Taxus	200	560	63.42	166.84	1.39546	0	0	-	-	-	gi|226508934|ref|NP_001152708.1|/1e-07/LOC100286349 [Zea mays] >gi|195659221|gb|ACG49078.1| calmodulin-related protein 2, touch-induced [Zea mays]
Unigene34145_Taxus	35	98	11.1	29.2	1.39541	2.06078e-07	1.48695e-06	-	-	-	gi|186522588|ref|NP_196857.2|/6e-09/KEG (KEEP ON GOING); protein binding / protein kinase/ ubiquitin-protein ligase [Arabidopsis thaliana] >gi|218526495|sp|Q9FY48.2|KEG_ARATH RecName: Full=E3 ubiquitin-protein ligase KEG; AltName: Full=RING finger protein KEG; AltName: Full=Protein KEEP ON GOING >gi|83817349|gb|ABC46683.1| RING E3 ligase protein [Arabidopsis thaliana]
Unigene32363_Taxus	60	168	19.03	50.05	1.39509	9.28368e-12	1.11749e-10	-	-	-	gi|37654366|gb|AAQ95730.1|/2e-23/phospholipase C [Vigna radiata]
Unigene1456_Taxus	84	235	26.64	70.01	1.39397	0	0	-	-	-	-
Unigene18649_Taxus	24	67	7.61	19.96	1.39114	1.92272e-05	9.79786e-05	-	-	-	gi|49652931|emb|CAG85267.1|/6e-06/DEHA2B07084p [Debaryomyces hansenii]
Unigene32688_Taxus	29	81	9.2	24.13	1.39112	2.50932e-06	1.4936e-05	-	-	-	gi|115479675|ref|NP_001063431.1|/1e-05/Os09g0469300 [Oryza sativa (japonica cultivar-group)] >gi|113631664|dbj|BAF25345.1| Os09g0469300 [Oryza sativa Japonica Group]
Unigene16229_Taxus	71	198	22.51	58.99	1.3899	0	0	-	-	-	-
Unigene7232_Taxus	42	117	13.32	34.86	1.38798	1.53838e-08	1.29032e-07	-	-	-	gi|225442973|ref|XP_002267834.1|/3e-06/PREDICTED: hypothetical protein [Vitis vinifera] >gi|270253921|emb|CBI36319.1| unnamed protein product [Vitis vinifera]
Unigene31757_Taxus	433	1204	137.31	358.7	1.38534	9.88098e-13	1.33255e-11	-	-	-	gi|32395571|gb|AAP37967.1|/5e-11/seed specific protein Bn15D1B [Brassica napus]
Unigene20357_Taxus	27	75	8.56	22.34	1.38395	6.55236e-06	3.64782e-05	GO:0009536//plastid	-	GO:0022900//electron transport chain	gi|11467348|ref|NP_043205.1|/3e-14/ferredoxin [Cyanophora paradoxa] >gi|119921|sp|P17007.3|FER1_CYAPA RecName: Full=Ferredoxin-1; AltName: Full=Ferredoxin I >gi|336631|gb|AAA31699.1| ferredoxin (petF) [Cyanophora paradoxa] >gi|1016149|gb|AAA81236.1| soluble [2Fe-2S] ferredoxin [Cyanophora paradoxa]
Unigene32714_Taxus	27	75	8.56	22.34	1.38395	6.55236e-06	3.64668e-05	-	-	-	gi|168061745|ref|XP_001782847.1|/3e-31/predicted protein [Physcomitrella patens subsp. patens] >gi|162665685|gb|EDQ52361.1| predicted protein [Physcomitrella patens subsp. patens]
Unigene9269_Taxus	63	175	19.98	52.14	1.38383	4.63186e-12	5.75429e-11	-	-	-	gi|118411045|ref|YP_874440.1|/1e-158/preprotein translocase subunit A [Phaeodactylum tricornutum] >gi|166918842|sp|A0T0G5.1|SECA_PHATR RecName: Full=Protein translocase subunit secA >gi|116739792|gb|ABK20663.1| preprotein translocase subunit A [Phaeodactylum tricornutum]
Unigene30063_Taxus	161	447	51.05	133.17	1.38329	0	0	-	-	-	-
Unigene1704_Taxus	35	97	11.1	28.9	1.38051	2.96952e-07	2.08522e-06	-	-	-	gi|82909664|gb|ABB94000.1|/5e-62/homeobox transcription factor KN4 [Picea mariana]
Unigene4016_Taxus	74	205	23.47	61.07	1.37965	4.06342e-14	6.70897e-13	-	-	-	gi|115489298|ref|NP_001067136.1|/2e-17/Os12g0581700 [Oryza sativa (japonica cultivar-group)] >gi|113649643|dbj|BAF30155.1| Os12g0581700 [Oryza sativa Japonica Group]
Unigene21806_Taxus	866	2392	274.61	712.64	1.37579	4.6363e-13	6.47809e-12	-	-	-	-
Unigene21387_Taxus	63	174	19.98	51.84	1.37551	6.6771e-12	8.18105e-11	-	-	-	gi|1232069|gb|AAB67737.1|/2e-88/cationic peroxidase [Stylosanthes humilis]
Unigene12258_Taxus	63	174	19.98	51.84	1.37551	6.6771e-12	8.17543e-11	-	-	-	gi|49659431|dbj|BAD27254.1|/5e-32/SlHDL1 [Silene latifolia]
Unigene36199_Taxus	42	116	13.32	34.56	1.37551	2.2111e-08	1.82449e-07	-	-	-	gi|115481672|ref|NP_001064429.1|/1e-109/Os10g0360100 [Oryza sativa (japonica cultivar-group)] >gi|113639038|dbj|BAF26343.1| Os10g0360100 [Oryza sativa Japonica Group]
Unigene10516_Taxus	25	69	7.93	20.56	1.37445	1.71524e-05	8.88285e-05	-	-	-	gi|12958607|gb|AAK09372.1|AF321557_1/1e-144/sucrose-6F-phosphate phosphohydrolase SPP2 [Triticum aestivum]
Unigene10335_Taxus	482	1328	152.85	395.65	1.37211	0	0	-	-	-	-
Unigene23464_Taxus	36	99	11.42	29.49	1.36866	2.65278e-07	1.8724e-06	-	-	-	-
Unigene20503_Taxus	111	305	35.2	90.87	1.36823	0	0	-	-	-	gi|115384488|ref|XP_001208791.1|/8e-28/nucleolar GTP-binding protein 1 [Aspergillus terreus NIH2624] >gi|114196483|gb|EAU38183.1| nucleolar GTP-binding protein 1 [Aspergillus terreus NIH2624]
Unigene14177_Taxus	51	140	16.17	41.71	1.36707	9.29606e-10	9.06951e-09	-	GO:0005506//iron ion binding;GO:0004601//peroxidase activity	GO:0006979//response to oxidative stress;GO:0008152//metabolic process	gi|3868756|dbj|BAA34205.1|/1e-09/catalase [Oryza sativa Japonica Group] >gi|33440012|gb|AAQ19030.1| catalase [Oryza sativa]
Unigene16537_Taxus	43	118	13.64	35.16	1.36609	1.97599e-08	1.64113e-07	-	-	-	gi|116057853|emb|CAL54056.1|/7e-15/IojAP protein-like (ISS) [Ostreococcus tauri]
Unigene28228_Taxus	62	170	19.66	50.65	1.3653	1.52922e-11	1.81379e-10	-	-	-	-
Unigene16710_Taxus	27	74	8.56	22.05	1.3651	9.4447e-06	5.08638e-05	-	-	-	-
Unigene7067_Taxus	27	74	8.56	22.05	1.3651	9.4447e-06	5.08484e-05	-	-	-	gi|116787730|gb|ABK24621.1|/2e-16/unknown [Picea sitchensis]
Unigene31386_Taxus	85	233	26.95	69.42	1.36507	0	0	-	-	-	gi|226495585|ref|NP_001147971.1|/2e-07/smr domain containing protein [Zea mays] >gi|195614920|gb|ACG29290.1| smr domain containing protein [Zea mays]
Unigene12128_Taxus	31	85	9.83	25.32	1.36501	2.0003e-06	1.22081e-05	-	-	-	gi|27476076|gb|AAO17007.1|/1e-08/Putative gag-pol polyprotein [Oryza sativa Japonica Group]
Unigene17597_Taxus	54	148	17.12	44.09	1.36477	3.24166e-10	3.33046e-09	-	-	-	gi|195623462|gb|ACG33561.1|/3e-35/R3H domain containing protein [Zea mays]
Unigene17396_Taxus	23	63	7.29	18.77	1.36444	4.5031e-05	0.000212736	-	-	-	-
Unigene54_Taxus	23	63	7.29	18.77	1.36444	4.5031e-05	0.00021268	-	-	-	gi|15528677|dbj|BAB64743.1|/5e-33/P0560B06.4 [Oryza sativa Japonica Group]
Unigene34228_Taxus	46	126	14.59	37.54	1.36345	6.85948e-09	6.01386e-08	-	-	-	gi|255675054|dbj|BAH92446.1|/5e-09/Os03g0852000 [Oryza sativa Japonica Group]
Unigene15334_Taxus	42	115	13.32	34.26	1.36293	3.17118e-08	2.56794e-07	-	-	-	gi|39725415|emb|CAE09058.1|/1e-54/MYB transcription factor [Eucalyptus gunnii]
Unigene3658_Taxus	53	145	16.81	43.2	1.36171	5.18856e-10	5.23114e-09	-	-	-	gi|159467236|ref|XP_001691804.1|/3e-21/clp protease adaptor protein [Chlamydomonas reinhardtii] >gi|158279150|gb|EDP04912.1| clp protease adaptor protein [Chlamydomonas reinhardtii]
Unigene30595_Taxus	60	164	19.03	48.86	1.36038	3.94582e-11	4.48023e-10	-	-	-	gi|224138406|ref|XP_002322806.1|/7e-18/iaa-amino acid hydrolase 4 [Populus trichocarpa] >gi|222867436|gb|EEF04567.1| iaa-amino acid hydrolase 4 [Populus trichocarpa]
Unigene31618_Taxus	26	71	8.24	21.15	1.35994	1.52702e-05	7.95436e-05	-	-	-	gi|224004596|ref|XP_002295949.1|/6e-20/demethylmenaquinone methyltransferase [Thalassiosira pseudonana CCMP1335] >gi|209585981|gb|ACI64666.1| demethylmenaquinone methyltransferase [Thalassiosira pseudonana CCMP1335]
Unigene26634_Taxus	211	576	66.91	171.61	1.35884	1.27676e-13	1.91944e-12	-	-	-	-
Unigene2189_Taxus	22	60	6.98	17.88	1.35705	7.30536e-05	0.000330233	GO:0030127//COPII vesicle coat	GO:0008270//zinc ion binding	GO:0006886//intracellular protein transport;GO:0006888//ER to Golgi vesicle-mediated transport	gi|74638434|sp|Q9C284.1|SEC23_NEUCR/1e-19/RecName: Full=Protein transport protein sec-23 >gi|12718409|emb|CAC28788.1| probable SEC23 [Neurospora crassa]
Unigene31907_Taxus	29	79	9.2	23.54	1.35541	5.20476e-06	2.93612e-05	-	-	-	gi|48310646|gb|AAT41859.1|/2e-26/At1g73885 [Arabidopsis thaliana]
Unigene6742_Taxus	21	57	6.66	16.98	1.35024	0.000118624	0.000509347	-	-	-	gi|28950733|gb|AAO63290.1|/2e-07/At5g57910 [Arabidopsis thaliana]
Unigene33642_Taxus	28	76	8.88	22.64	1.35024	8.40174e-06	4.58008e-05	-	-	-	gi|121699266|ref|XP_001267964.1|/7e-21/WD repeat protein [Aspergillus clavatus NRRL 1] >gi|119396106|gb|EAW06538.1| WD repeat protein [Aspergillus clavatus NRRL 1]
Unigene35374_Taxus	52	141	16.49	42.01	1.34914	1.18624e-09	1.14293e-08	-	-	-	-
Unigene22125_Taxus	34	92	10.78	27.41	1.34635	9.8445e-07	6.37281e-06	-	-	-	-
Unigene6948_Taxus	47	127	14.9	37.84	1.3446	8.74374e-09	7.57635e-08	-	-	-	-
Unigene6472_Taxus	20	54	6.34	16.09	1.34361	0.000192813	0.000787474	-	-	-	gi|255670598|dbj|BAF07783.2|/7e-11/Os02g0143400 [Oryza sativa Japonica Group]
Unigene20650_Taxus	20	54	6.34	16.09	1.34361	0.000192813	0.000787294	-	-	-	-
Unigene8295_Taxus	167	451	52.96	134.36	1.34313	7.9714e-14	1.2479e-12	-	-	-	gi|37704399|gb|AAR01504.1|/5e-30/cytosolic class I small heat shock protein 1A [Nicotiana tabacum] >gi|37704401|gb|AAR01505.1| cytosolic class I small heat shock protein 1A [Nicotiana tabacum]
Unigene6938_Taxus	46	124	14.59	36.94	1.3402	1.40062e-08	1.18033e-07	-	-	-	gi|159464629|ref|XP_001690544.1|/6e-06/EMP/nonaspanin domain family protein [Chlamydomonas reinhardtii] >gi|158280044|gb|EDP05803.1| EMP/nonaspanin domain family protein [Chlamydomonas reinhardtii]
Unigene28729_Taxus	59	159	18.71	47.37	1.34016	1.2853e-10	1.37689e-09	-	-	-	-
Unigene15619_Taxus	132	355	41.86	105.76	1.33715	5.08482e-14	8.19042e-13	-	-	-	gi|195645460|gb|ACG42198.1|/9e-30/cytoplasmic membrane protein [Zea mays]
Unigene35339_Taxus	80	215	25.37	64.05	1.33608	0	0	-	-	-	gi|194476827|ref|YP_002049006.1|/6e-12/50S ribosomal protein L10 [Paulinella chromatophora] >gi|171191834|gb|ACB42796.1| 50S ribosomal protein L10 [Paulinella chromatophora]
Unigene35994_Taxus	80	215	25.37	64.05	1.33608	0	0	-	-	-	gi|2493038|sp|Q40610.1|ATPD_OCHNE/4e-20/RecName: Full=ATP synthase subunit delta, chloroplastic; AltName: Full=ATP synthase F(1) sector subunit delta; AltName: Full=F-type ATPase subunit delta >gi|1430914|emb|CAA67539.1| subunit delta of ATPase [Ochrosphaera neapolitana]
Unigene15556_Taxus	32	86	10.15	25.62	1.33579	2.5504e-06	1.51552e-05	-	-	-	gi|122937697|gb|ABM68560.1|/2e-07/retrotransposon protein [Lilium longiflorum]
Unigene30854_Taxus	31	83	9.83	24.73	1.331	4.10714e-06	2.35572e-05	-	-	-	-
Unigene6969_Taxus	59	158	18.71	47.07	1.331	1.82837e-10	1.92395e-09	-	-	-	-
Unigene16647_Taxus	34	91	10.78	27.11	1.33047	1.40695e-06	8.80082e-06	-	-	-	gi|195614000|gb|ACG28830.1|/1e-21/spotted leaf protein 11 [Zea mays]
Unigene30508_Taxus	24	64	7.61	19.07	1.32534	5.7369e-05	0.000265186	-	-	-	-
Unigene5162_Taxus	24	64	7.61	19.07	1.32534	5.7369e-05	0.000265118	-	-	-	gi|115440185|ref|NP_001044372.1|/1e-126/Os01g0769700 [Oryza sativa (japonica cultivar-group)] >gi|113533903|dbj|BAF06286.1| Os01g0769700 [Oryza sativa Japonica Group]
Unigene36405_Taxus	78	208	24.73	61.97	1.32531	1.47882e-13	2.20831e-12	-	-	-	gi|63054660|ref|NP_594819.2|/2e-06/GTPase activating protein [Schizosaccharomyces pombe] >gi|212288603|sp|Q9URY3.4|YLOH_SCHPO RecName: Full=TBC domain-containing protein C1952.17c
Unigene16953_Taxus	63	168	19.98	50.05	1.32481	5.67282e-11	6.32424e-10	-	-	-	gi|108706230|gb|ABF94025.1|/1e-43/expressed protein [Oryza sativa (japonica cultivar-group)]
Unigene17822_Taxus	313	834	99.25	248.47	1.32393	0	0	-	-	-	-
Unigene29099_Taxus	52	138	16.49	41.11	1.3179	3.41842e-09	3.11027e-08	-	-	-	gi|148910765|gb|ABR18449.1|/2e-10/unknown [Picea sitchensis]
Unigene34678_Taxus	23	61	7.29	18.17	1.31757	9.28862e-05	0.000409393	-	-	-	gi|226492178|ref|NP_001147453.1|/6e-06/early nodulin 75 protein [Zea mays] >gi|195611524|gb|ACG27592.1| early nodulin 75 protein [Zea mays]
Unigene25602_Taxus	63	167	19.98	49.75	1.31614	8.04816e-11	8.84503e-10	-	-	-	-
Unigene32850_Taxus	62	164	19.66	48.86	1.31339	1.28306e-10	1.37532e-09	-	-	-	-
Unigene19886_Taxus	28	74	8.88	22.05	1.31215	1.71921e-05	8.9008e-05	-	-	-	gi|30268666|dbj|BAC76004.1|/4e-25/RelA-SpoT like protein RSH1 [Nicotiana tabacum]
Unigene12948_Taxus	25	66	7.93	19.66	1.30987	5.07052e-05	0.000237152	-	-	-	gi|223452400|gb|ACM89527.1|/3e-08/protein kinase-related protein [Glycine max]
Unigene21690_Taxus	105	277	33.3	82.53	1.3094	0	0	-	-	-	-
Unigene20589_Taxus	55	145	17.44	43.2	1.30863	1.68604e-09	1.59262e-08	-	-	-	gi|238767602|dbj|BAH66640.1|/3e-96/chlorophyllide a oxygenase [Nephroselmis pyriformis]
Unigene27336_Taxus	162	427	51.37	127.21	1.30821	0	0	-	-	-	-
Unigene29344_Taxus	22	58	6.98	17.28	1.3078	0.000150503	0.000634456	-	-	-	-
Unigene19914_Taxus	49	129	15.54	38.43	1.30625	1.39531e-08	1.17696e-07	-	-	-	gi|168023746|ref|XP_001764398.1|/1e-71/CLL4A clavata1-like receptor S/T protein kinase protein [Physcomitrella patens subsp. patens] >gi|162684262|gb|EDQ70665.1| CLL4A clavata1-like receptor S/T protein kinase protein [Physcomitrella patens subsp. patens]
Unigene32474_Taxus	76	200	24.1	59.59	1.30604	1.47571e-12	1.9402e-11	-	-	-	gi|195627620|gb|ACG35640.1|/5e-13/thioredoxin H-type 5 [Zea mays]
Unigene10396_Taxus	38	100	12.05	29.79	1.30579	6.10008e-07	4.0732e-06	-	-	-	gi|145343626|ref|XP_001416417.1|/5e-07/conserved protein probably involved in Fe-S center assembly [Ostreococcus lucimarinus CCE9901] >gi|144576642|gb|ABO94710.1| conserved protein probably involved in Fe-S center assembly [Ostreococcus lucimarinus CCE9901]
Unigene27874_Taxus	130	342	41.22	101.89	1.3056	0	0	-	-	-	-
Unigene21252_Taxus	57	150	18.08	44.69	1.30556	9.37224e-10	9.11887e-09	-	-	-	gi|87241133|gb|ABD32991.1|/1e-136/Protein kinase [Medicago truncatula]
Unigene32690_Taxus	57	150	18.08	44.69	1.30556	9.37224e-10	9.11389e-09	-	-	-	-
Unigene23951_Taxus	54	142	17.12	42.31	1.30532	2.69152e-09	2.48829e-08	-	-	-	gi|115445859|ref|NP_001046709.1|/4e-06/Os02g0327000 [Oryza sativa (japonica cultivar-group)] >gi|46390270|dbj|BAD15699.1| C2 domain-containing protein-like [Oryza sativa Japonica Group] >gi|46390873|dbj|BAD16390.1| C2 domain-containing protein-like [Oryza sativa Japonica Group] >gi|113536240|dbj|BAF08623.1| Os02g0327000 [Oryza sativa Japonica Group] >gi|156254832|gb|ABU62827.1| G-protein binding …
Unigene7627_Taxus	64	168	20.29	50.05	1.3026	1.01076e-10	1.0973e-09	-	-	-	gi|121715198|ref|XP_001275208.1|/2e-33/retinoblastoma-binding protein [Aspergillus clavatus NRRL 1] >gi|119403365|gb|EAW13782.1| retinoblastoma-binding protein [Aspergillus clavatus NRRL 1]
Unigene3822_Taxus	24	63	7.61	18.77	1.30246	8.19782e-05	0.0003642	-	-	-	gi|38347224|emb|CAE05019.2|/9e-06/OSJNBa0044M19.6 [Oryza sativa (japonica cultivar-group)]
Unigene15987_Taxus	45	118	14.27	35.16	1.30095	6.43638e-08	5.02032e-07	-	-	-	gi|226454526|gb|EEH51832.1|/4e-23/glycosyltransferase family 4 protein [Micromonas pusilla CCMP1545]
Unigene19480_Taxus	29	76	9.2	22.64	1.29917	1.51901e-05	7.91725e-05	-	-	-	gi|115448729|ref|NP_001048144.1|/1e-47/Os02g0753200 [Oryza sativa (japonica cultivar-group)] >gi|113537675|dbj|BAF10058.1| Os02g0753200 [Oryza sativa Japonica Group]
Unigene24490_Taxus	406	1063	128.75	316.7	1.29854	0	0	-	-	-	-
Unigene28630_Taxus	47	123	14.9	36.64	1.29811	3.56428e-08	2.87841e-07	-	-	-	-
Unigene14770_Taxus	26	68	8.24	20.26	1.29792	4.47476e-05	0.000211509	-	-	-	gi|115455101|ref|NP_001051151.1|/2e-10/Os03g0729000 [Oryza sativa (japonica cultivar-group)] >gi|108710881|gb|ABF98676.1| expressed protein [Oryza sativa (japonica cultivar-group)] >gi|113549622|dbj|BAF13065.1| Os03g0729000 [Oryza sativa Japonica Group]
Unigene32973_Taxus	188	492	59.62	146.58	1.29782	9.76996e-14	1.50304e-12	-	-	-	gi|115489606|ref|NP_001067290.1|/1e-07/Os12g0617900 [Oryza sativa (japonica cultivar-group)] >gi|110832776|sp|Q2QM47.2|BSL2_ORYSJ RecName: Full=Serine/threonine-protein phosphatase BSL2 homolog; AltName: Full=BSU1-like protein 2 homolog >gi|113649797|dbj|BAF30309.1| Os12g0617900 [Oryza sativa Japonica Group]
Unigene35371_Taxus	229	596	72.62	177.56	1.28987	1.15019e-13	1.74835e-12	-	-	-	gi|255717667|ref|XP_002555114.1|/1e-11/KLTH0G01672p [Lachancea thermotolerans] >gi|238936498|emb|CAR24677.1| KLTH0G01672p [Lachancea thermotolerans]
Unigene4681_Taxus	226	588	71.67	175.18	1.2894	0	0	GO:0005886//plasma membrane	-	GO:0048367//shoot development	gi|12229654|sp|Q9LIK7.1|ACA13_ARATH/0.0/RecName: Full=Putative calcium-transporting ATPase 13, plasma membrane-type; AltName: Full=Ca(2+)-ATPase isoform 13 >gi|11994720|dbj|BAB03036.1| Ca2+-transporting ATPase-like protein [Arabidopsis thaliana]
Unigene4756_Taxus	75	195	23.78	58.1	1.28879	4.65184e-12	5.77509e-11	GO:0009536//plastid	-	-	gi|6136610|sp|O78473.1|YCF24_GUITH/1e-09/RecName: Full=UPF0051 protein ycf24 >gi|3603003|gb|AAC35664.1| ABC transporter [Guillardia theta]
Unigene2532_Taxus	35	91	11.1	27.11	1.28827	2.5175e-06	1.49797e-05	-	-	-	-
Unigene18505_Taxus	35	91	11.1	27.11	1.28827	2.5175e-06	1.49747e-05	-	-	-	gi|255679010|dbj|BAH94638.1|/2e-10/Os09g0491596 [Oryza sativa Japonica Group]
Unigene34366_Taxus	32	83	10.15	24.73	1.28478	7.35342e-06	4.0671e-05	-	-	-	gi|224100703|ref|XP_002311981.1|/6e-69/acyl:coa ligase [Populus trichocarpa] >gi|222851801|gb|EEE89348.1| acyl:coa ligase [Populus trichocarpa]
Unigene804_Taxus	27	70	8.56	20.85	1.28436	3.94362e-05	0.000188252	-	-	-	gi|19113007|ref|NP_596215.1|/3e-06/di-trans,poly-cis-decaprenylcistransferase [Schizosaccharomyces pombe 972h-] >gi|74639014|sp|Q9Y7K8.1|UPPS_SCHPO RecName: Full=Probable undecaprenyl pyrophosphate synthetase; Short=UPP synthetase; AltName: Full=Di-trans,poly-cis-decaprenylcistransferase; AltName: Full=Undecaprenyl diphosphate synthase; Short=UDS >gi|4539259|emb|CAB39848.1| di-trans,poly-cis-deca…
Unigene31794_Taxus	49	127	15.54	37.84	1.28393	2.78952e-08	2.26816e-07	-	-	-	-
Unigene6680_Taxus	22	57	6.98	16.98	1.28254	0.00021469	0.000871826	-	-	-	gi|238842379|gb|EEQ32041.1|/4e-38/di/tri peptide transporter 2 [Microsporum canis CBS 113480]
Unigene17792_Taxus	73	189	23.15	56.31	1.28238	1.19913e-11	1.42989e-10	-	-	-	gi|210063845|gb|ACJ06598.1|/4e-06/expressed protein [Aegilops speltoides]
Unigene15934_Taxus	34	88	10.78	26.22	1.28231	4.03932e-06	2.32506e-05	-	-	-	gi|195609520|gb|ACG26590.1|/7e-06/Grx_S16 - glutaredoxin subgroup II [Zea mays]
Unigene3155_Taxus	209	541	66.28	161.18	1.28203	7.52732e-14	1.18882e-12	-	-	-	-
Unigene34442_Taxus	24	62	7.61	18.47	1.27922	0.000116691	0.000502016	-	-	-	gi|115446187|ref|NP_001046873.1|/5e-17/Os02g0491400 [Oryza sativa (japonica cultivar-group)] >gi|113536404|dbj|BAF08787.1| Os02g0491400 [Oryza sativa Japonica Group]
Unigene35531_Taxus	78	201	24.73	59.88	1.27581	3.18612e-12	4.02844e-11	-	-	-	-
Unigene26689_Taxus	23	59	7.29	17.58	1.26994	0.000188586	0.000771802	-	-	-	-
Unigene8607_Taxus	150	385	47.57	114.7	1.26974	0	0	-	-	-	gi|255644860|gb|ACU22930.1|/1e-10/unknown [Glycine max]
Unigene33762_Taxus	680	1745	215.63	519.88	1.26962	0	0	-	-	-	-
Unigene17856_Taxus	4384	11249	1390.19	3351.38	1.26947	1.65132e-11	1.94823e-10	-	-	-	-
Unigene31115_Taxus	108	277	34.25	82.53	1.26881	0	0	-	-	-	gi|115473541|ref|NP_001060369.1|/8e-06/Os07g0632800 [Oryza sativa (japonica cultivar-group)]
Unigene20482_Taxus	108	277	34.25	82.53	1.26881	0	0	-	-	-	gi|219124534|ref|XP_002182556.1|/2e-22/delta 6 desaturase [Phaeodactylum tricornutum CCAP 1055/1] >gi|217405902|gb|EEC45843.1| delta 6 desaturase [Phaeodactylum tricornutum CCAP 1055/1]
Unigene10230_Taxus	291	746	92.28	222.25	1.26809	0	0	-	-	-	-
Unigene35717_Taxus	238	610	75.47	181.74	1.2679	5.3424e-13	7.38362e-12	-	-	-	gi|224006530|ref|XP_002292225.1|/2e-61/glycine decarboxylase t-protein [Thalassiosira pseudonana CCMP1335] >gi|220971867|gb|EED90200.1| glycine decarboxylase t-protein [Thalassiosira pseudonana CCMP1335]
Unigene33882_Taxus	48	123	15.22	36.64	1.26745	6.27186e-08	4.89628e-07	-	-	-	-
Unigene6655_Taxus	217	556	68.81	165.65	1.26745	1.01918e-13	1.55986e-12	-	-	-	gi|62642092|gb|AAX92685.1|/4e-36/probable aquaporin [Picea abies]
Unigene16155_Taxus	98	251	31.08	74.78	1.26667	0	0	-	-	-	gi|119638446|gb|ABL85037.1|/1e-29/acid phosphatase [Brachypodium sylvaticum]
Unigene21353_Taxus	59	151	18.71	44.99	1.26579	2.05612e-09	1.91779e-08	-	-	-	gi|5080775|gb|AAD39285.1|AC007576_8/4e-48/Unknown protein [Arabidopsis thaliana]
Unigene14163_Taxus	143	365	45.35	108.74	1.26171	0	0	-	-	-	-
Unigene20104_Taxus	91	232	28.86	69.12	1.26003	0	0	GO:0009536//plastid	-	-	gi|132961|sp|P27684.1|PSRP5_SPIOL/3e-06/RecName: Full=50S ribosomal protein 5 alpha, chloroplastic; AltName: Full=Plastid-specific 50S ribosomal protein 5 alpha; Short=PSRP-5; AltName: Full=50S ribosomal protein L40; AltName: Full=CL40; Contains: RecName: Full=50S ribosomal protein 5 beta, chloroplastic; Contains: RecName: Full=50S ribosomal protein 5 gamma, chloroplastic; Flags: Precursor >gi|17…
Unigene10682_Taxus	31	79	9.83	23.54	1.25985	1.66992e-05	8.66328e-05	-	-	-	gi|94807648|gb|ABF47121.1|/6e-07/At5g02220 [Arabidopsis thaliana]
Unigene32723_Taxus	55	140	17.44	41.71	1.25799	9.3869e-09	8.11391e-08	-	-	-	gi|85082342|ref|XP_956898.1|/5e-06/citrate synthase, mitochondrial precursor [Neurospora crassa OR74A] >gi|30316357|sp|P34085.2|CISY_NEUCR RecName: Full=Citrate synthase, mitochondrial; Flags: Precursor >gi|11268307|pir||T49379 citrate synthase, mitochondrial [imported] - Neurospora crassa >gi|7800823|emb|CAB91282.1| mitochondrial citrate synthase [Neurospora crassa] >gi|28917978|gb|EAA27662.1| c…
Unigene10374_Taxus	37	94	11.73	28.01	1.25574	2.75996e-06	1.62972e-05	-	-	-	gi|115458514|ref|NP_001052857.1|/3e-09/Os04g0437300 [Oryza sativa (japonica cultivar-group)] >gi|38344067|emb|CAD40819.2| OSJNBa0006B20.11 [Oryza sativa (japonica cultivar-group)] >gi|113564428|dbj|BAF14771.1| Os04g0437300 [Oryza sativa Japonica Group] >gi|116310783|emb|CAH67575.1| H0315A08.5 [Oryza sativa (indica cultivar-group)]
Unigene4061_Taxus	28	71	8.88	21.15	1.25203	4.90704e-05	0.000230718	-	-	-	gi|18394639|ref|NP_564060.1|/4e-06/zinc finger (C3HC4-type RING finger) family protein [Arabidopsis thaliana] >gi|30685966|ref|NP_849687.1| zinc finger (C3HC4-type RING finger) family protein [Arabidopsis thaliana] >gi|30685971|ref|NP_849688.1| zinc finger (C3HC4-type RING finger) family protein [Arabidopsis thaliana] >gi|25082694|gb|AAN71992.1| expressed protein [Arabidopsis thaliana] >gi|303875…
Unigene20827_Taxus	30	76	9.51	22.64	1.25136	2.68088e-05	0.000133296	-	-	-	gi|18481961|gb|AAL73559.1|AC079632_3/2e-08/Unknown protein [Oryza sativa Japonica Group] >gi|19920208|gb|AAM08640.1|AC108883_13 Putative dehydrogenase [Oryza sativa Japonica Group]
Unigene35685_Taxus	47	119	14.9	35.45	1.25047	1.4049e-07	1.03981e-06	-	-	-	gi|262411024|gb|ACY66878.1|/1e-71/P30Sh115J16 [Saccharum hybrid cultivar R570]
Unigene27626_Taxus	197	498	62.47	148.37	1.24796	0	0	-	-	-	-
Unigene32054_Taxus	53	134	16.81	39.92	1.24779	2.37636e-08	1.95362e-07	-	-	-	-
Unigene22687_Taxus	38	96	12.05	28.6	1.24698	2.4269e-06	1.44648e-05	-	-	-	-
Unigene16738_Taxus	103	260	32.66	77.46	1.24593	0	0	-	-	-	gi|30023772|gb|AAP13419.1|/7e-72/At3g44330 [Arabidopsis thaliana]
Unigene22081_Taxus	89	224	28.22	66.74	1.24183	5.42678e-13	7.48282e-12	-	-	-	-
Unigene13932_Taxus	31	78	9.83	23.24	1.24135	2.35266e-05	0.000118733	-	-	-	-
Unigene20810_Taxus	41	103	13	30.69	1.23926	1.17375e-06	7.44939e-06	-	-	-	gi|283777744|gb|ADB28901.1|/3e-12/YTH domain family protein YT521-B-like protein [Lolium perenne]
Unigene2584_Taxus	47	118	14.9	35.16	1.23862	1.96875e-07	1.42227e-06	GO:0005634//nucleus;GO:0005829//cytosol	GO:0008175//tRNA methyltransferase activity	GO:0030488//tRNA methylation	gi|85086230|ref|XP_957655.1|/2e-77/tRNA (uridine-2'-O-)-methyltransferase TRM7 [Neurospora crassa OR74A] >gi|28918749|gb|EAA28419.1| tRNA (uridine-2'-O-)-methyltransferase TRM7 [Neurospora crassa OR74A]
Unigene35834_Taxus	51	128	16.17	38.13	1.23761	6.01238e-08	4.69989e-07	-	-	-	gi|116058871|emb|CAL54578.1|/3e-12/ribosome-binding factor A protein-like (ISS) [Ostreococcus tauri]
Unigene20633_Taxus	53	133	16.81	39.62	1.23691	3.32606e-08	2.69091e-07	-	-	-	gi|167427545|gb|ABZ80409.1|/1e-21/hairpin-inducing protein [Casuarina glauca]
Unigene19188_Taxus	53	133	16.81	39.62	1.23691	3.32606e-08	2.68968e-07	-	-	-	gi|150866081|ref|XP_001385557.2|/2e-31/tyrosine phosphatase [Pichia stipitis CBS 6054] >gi|149387337|gb|ABN67528.2| tyrosine phosphatase [Pichia stipitis CBS 6054]
Unigene28072_Taxus	69	173	21.88	51.54	1.23608	2.97428e-10	3.06814e-09	-	-	-	-
Unigene11392_Taxus	24	60	7.61	17.88	1.23238	0.000233614	0.000944155	-	-	-	gi|193848575|gb|ACF22760.1|/3e-49/2-phosphoglycerate kinase [Brachypodium distachyon]
Unigene20019_Taxus	28	70	8.88	20.85	1.23142	6.912e-05	0.000314286	-	-	-	gi|115472301|ref|NP_001059749.1|/1e-19/Os07g0509700 [Oryza sativa (japonica cultivar-group)]
Unigene14085_Taxus	41	102	13	30.39	1.22509	1.64319e-06	1.01715e-05	GO:0009536//plastid;GO:0005739//mitochondrion	GO:0046872//metal ion binding;GO:0003824//catalytic activity	GO:0006508//proteolysis	gi|224009598|ref|XP_002293757.1|/2e-32/stromal processing peptidase [Thalassiosira pseudonana CCMP1335] >gi|220970429|gb|EED88766.1| stromal processing peptidase [Thalassiosira pseudonana CCMP1335]
Unigene31903_Taxus	33	82	10.46	24.43	1.22377	1.80744e-05	9.30892e-05	-	-	-	gi|11467304|ref|NP_043161.1|/9e-06/ribosomal protein L35 [Cyanophora paradoxa] >gi|132915|sp|P14810.1|RK35_CYAPA RecName: Full=50S ribosomal protein L35, cyanelle >gi|11292|emb|CAA34907.1| ribosomal protein L35 [Cyanophora paradoxa] >gi|1016105|gb|AAA81192.1| ribosomal protein L35 [Cyanophora paradoxa]
Unigene13083_Taxus	25	62	7.93	18.47	1.21979	0.000204166	0.000830794	-	-	-	gi|81295664|gb|ABB70125.1|/7e-35/homogentisate phytyltransferase VTE2-1 [Cuphea pulcherrima]
Unigene34880_Taxus	209	518	66.28	154.33	1.21937	7.52732e-14	1.18988e-12	-	-	-	gi|1350535|gb|AAC24488.1|/1e-06/late embryogenesis abundant protein [Picea glauca]
Unigene7039_Taxus	44	109	13.95	32.47	1.21884	7.93938e-07	5.20958e-06	-	-	-	gi|115459986|ref|NP_001053593.1|/4e-18/Os04g0568900 [Oryza sativa (japonica cultivar-group)]
Unigene6469_Taxus	61	151	19.34	44.99	1.21802	6.09064e-09	5.3902e-08	-	-	-	gi|27311725|gb|AAO00828.1|/6e-09/Unknown protein [Arabidopsis thaliana] >gi|30725702|gb|AAP37873.1| At3g25590 [Arabidopsis thaliana]
Unigene7207_Taxus	40	99	12.68	29.49	1.21767	2.61858e-06	1.55396e-05	-	-	-	gi|108710019|gb|ABF97814.1|/8e-24/Helix-loop-helix DNA-binding domain containing protein, expressed [Oryza sativa (japonica cultivar-group)]
Unigene28737_Taxus	1099	2720	348.5	810.36	1.2174	2.07124e-12	2.67191e-11	-	-	-	-
Unigene26414_Taxus	70	172	22.2	51.24	1.20671	7.04654e-10	7.00525e-09	-	-	-	-
Unigene26258_Taxus	112	275	35.52	81.93	1.20576	0	0	-	-	-	-
Unigene25671_Taxus	51	125	16.17	37.24	1.20353	1.62975e-07	1.19826e-06	-	-	-	-
Unigene31603_Taxus	111	272	35.2	81.04	1.20306	0	0	-	-	-	gi|186489643|ref|NP_001117455.1|/3e-10/oxidoreductase [Arabidopsis thaliana]
Unigene15423_Taxus	58	142	18.39	42.31	1.20208	2.4195e-08	1.9845e-07	-	-	-	gi|226506504|ref|NP_001147828.1|/7e-09/LOC100281438 [Zea mays] >gi|195613986|gb|ACG28823.1| DNA binding protein [Zea mays]
Unigene18977_Taxus	67	164	21.25	48.86	1.20119	2.00592e-09	1.87195e-08	-	-	-	gi|115436170|ref|NP_001042843.1|/2e-08/Os01g0306100 [Oryza sativa (japonica cultivar-group)] >gi|113532374|dbj|BAF04757.1| Os01g0306100 [Oryza sativa Japonica Group]
Unigene30647_Taxus	29	71	9.2	21.15	1.20095	8.47166e-05	0.000375243	-	-	-	gi|115472083|ref|NP_001059640.1|/1e-16/Os07g0481000 [Oryza sativa (japonica cultivar-group)] >gi|113611176|dbj|BAF21554.1| Os07g0481000 [Oryza sativa Japonica Group]
Unigene29463_Taxus	364	890	115.43	265.15	1.19979	0	0	-	-	-	-
Unigene36130_Taxus	121	295	38.37	87.89	1.19572	0	0	-	-	-	gi|159475828|ref|XP_001696016.1|/8e-07/subunit of the ESCRT-I complex [Chlamydomonas reinhardtii] >gi|158275187|gb|EDP00965.1| subunit of the ESCRT-I complex [Chlamydomonas reinhardtii]
Unigene35468_Taxus	185	451	58.66	134.36	1.19565	0	0	-	-	-	gi|75282265|sp|Q41593.1|SPZ1A_WHEAT/2e-53/RecName: Full=Serpin-Z1A; AltName: Full=TriaeZ1a; AltName: Full=WSZ1a; Short=WSZ1; AltName: Full=WSZCI >gi|871551|emb|CAA90071.1| serpin [Triticum aestivum]
Unigene23819_Taxus	225	548	71.35	163.26	1.19419	0	0	-	-	-	-
Unigene22738_Taxus	170	414	53.91	123.34	1.19402	2.69784e-13	3.86973e-12	-	-	-	-
Unigene31391_Taxus	28	68	8.88	20.26	1.19	0.000135644	0.000574945	-	-	-	-
Unigene29763_Taxus	306	742	97.03	221.06	1.18794	0	0	GO:0009507//chloroplast	GO:0009055//electron carrier activity;GO:0005515//protein binding;GO:0015035//protein disulfide oxidoreductase activity	GO:0045454//cell redox homeostasis;GO:0006662//glycerol ether metabolic process;GO:0006810//transport;GO:0022900//electron transport chain	gi|6539614|gb|AAF15951.1|AF095752_1/2e-32/thioredoxin m4 [Arabidopsis thaliana]
Unigene10103_Taxus	26	63	8.24	18.77	1.18771	0.000249442	0.000999957	-	-	-	gi|116058551|emb|CAL53740.1|/1e-10/DEAD-box protein abstrakt (ISS) [Ostreococcus tauri]
Unigene166_Taxus	26	63	8.24	18.77	1.18771	0.000249442	0.000999732	-	-	-	-
Unigene25994_Taxus	66	160	20.93	47.67	1.18751	4.38782e-09	3.95392e-08	-	-	-	-
Unigene21634_Taxus	144	349	45.66	103.98	1.1873	1.44329e-14	2.4558e-13	-	-	-	-
Unigene10114_Taxus	57	138	18.08	41.11	1.18509	5.3054e-08	4.18581e-07	-	-	-	-
Unigene27522_Taxus	57	138	18.08	41.11	1.18509	5.3054e-08	4.18396e-07	-	-	-	-
Unigene15846_Taxus	50	121	15.86	36.05	1.18461	3.58386e-07	2.4843e-06	-	-	-	-
Unigene6819_Taxus	50	121	15.86	36.05	1.18461	3.58386e-07	2.48333e-06	-	-	-	gi|29028832|gb|AAO64795.1|/3e-30/At5g23920 [Arabidopsis thaliana]
Unigene27616_Taxus	31	75	9.83	22.34	1.18437	6.44868e-05	0.00029632	-	-	-	-
Unigene5141_Taxus	74	179	23.47	53.33	1.18413	5.77226e-10	5.79666e-09	GO:0016021//integral to membrane;GO:0009507//chloroplast	GO:0005488//binding;GO:0003824//catalytic activity;GO:0005216//ion channel activity	GO:0006811//ion transport;GO:0008152//metabolic process	gi|163256844|emb|CAO02690.1|/2e-68/DMI1 protein [Medicago truncatula var. truncatula]
Unigene35266_Taxus	137	331	43.44	98.61	1.18271	2.00284e-13	2.95125e-12	-	-	-	gi|115480445|ref|NP_001063816.1|/3e-53/Os09g0541700 [Oryza sativa (japonica cultivar-group)] >gi|113632049|dbj|BAF25730.1| Os09g0541700 [Oryza sativa Japonica Group]
Unigene33130_Taxus	215	519	68.18	154.62	1.18131	0	0	GO:0009570//chloroplast stroma	-	-	gi|226506150|ref|NP_001147441.1|/2e-28/cystathionin beta synthase protein [Zea mays] >gi|195611422|gb|ACG27541.1| cystathionin beta synthase protein [Zea mays]
Unigene5265_Taxus	29	70	9.2	20.85	1.18034	0.000118207	0.000507802	-	-	-	gi|108864483|gb|ABA94163.2|/6e-14/Protein kinase domain containing protein, expressed [Oryza sativa (japonica cultivar-group)]
Unigene11263_Taxus	29	70	9.2	20.85	1.18034	0.000118207	0.000507679	-	-	-	gi|115482136|ref|NP_001064661.1|/7e-08/Os10g0430700 [Oryza sativa (japonica cultivar-group)] >gi|110289123|gb|ABG66089.1| expressed protein [Oryza sativa (japonica cultivar-group)] >gi|113639270|dbj|BAF26575.1| Os10g0430700 [Oryza sativa Japonica Group]
Unigene19628_Taxus	37	89	11.73	26.52	1.17688	1.47037e-05	7.67498e-05	-	-	-	gi|226460109|gb|EEH57404.1|/3e-13/ankyrin repeat protein [Micromonas pusilla CCMP1545]
Unigene13169_Taxus	42	101	13.32	30.09	1.17569	3.87604e-06	2.2383e-05	-	-	-	gi|18416726|ref|NP_567743.1|/8e-13/elongation factor P (EF-P) family protein [Arabidopsis thaliana]
Unigene17717_Taxus	87	209	27.59	62.27	1.17439	2.83908e-11	3.2843e-10	-	-	-	-
Unigene29601_Taxus	30	72	9.51	21.45	1.17346	0.000102956	0.00044955	-	-	-	-
Unigene11494_Taxus	30	72	9.51	21.45	1.17346	0.000102956	0.00044944	-	-	-	gi|225463691|ref|XP_002276635.1|/5e-31/PREDICTED: similar to VRP1-1 isoform 2 [Vitis vinifera]
Unigene33902_Taxus	79	189	25.05	56.31	1.16858	2.97126e-10	3.06858e-09	-	-	-	gi|148362058|gb|ABQ59608.1|/3e-10/NFR1b [Glycine max]
Unigene21528_Taxus	28	67	8.88	19.96	1.16848	0.000188948	0.000772928	-	-	-	-
Unigene16959_Taxus	28	67	8.88	19.96	1.16848	0.000188948	0.000772751	-	-	-	-
Unigene30740_Taxus	98	234	31.08	69.71	1.16538	2.50244e-12	3.19119e-11	-	-	-	-
Unigene11204_Taxus	52	124	16.49	36.94	1.16359	3.78406e-07	2.61392e-06	GO:0009536//plastid	-	-	gi|149392669|gb|ABR26137.1|/2e-27/calcium homeostasis regulator chor1 [Oryza sativa Indica Group]
Unigene24506_Taxus	42	100	13.32	29.79	1.16123	5.362e-06	3.01814e-05	GO:0016023//cytoplasmic membrane-bounded vesicle	-	-	gi|195607360|gb|ACG25510.1|/2e-15/beta-glucosidase [Zea mays]
Unigene14881_Taxus	29	69	9.2	20.56	1.16013	0.000164325	0.00068096	-	-	-	gi|160899032|ref|YP_001564614.1|/4e-33/NUDIX hydrolase [Delftia acidovorans SPH-1] >gi|160364616|gb|ABX36229.1| NUDIX hydrolase [Delftia acidovorans SPH-1]
Unigene6968_Taxus	70	166	22.2	49.46	1.1557	4.88588e-09	4.36301e-08	-	-	-	-
Unigene27214_Taxus	205	486	65.01	144.79	1.15523	3.8436e-13	5.41294e-12	-	-	-	-
Unigene29583_Taxus	95	225	30.13	67.03	1.15361	9.80104e-12	1.175e-10	-	-	-	gi|75333913|sp|Q9FII5.1|Y5148_ARATH/8e-12/RecName: Full=Probable leucine-rich repeat receptor-like protein kinase At5g61480; Flags: Precursor >gi|10177178|dbj|BAB10447.1| receptor protein kinase-like protein [Arabidopsis thaliana] >gi|224589737|gb|ACN59400.1| leucine-rich repeat receptor-like protein kinase [Arabidopsis thaliana]
Unigene15835_Taxus	155	367	49.15	109.34	1.15356	2.74892e-13	3.93034e-12	-	-	-	gi|255673876|dbj|BAF06720.2|/6e-06/Os01g0848900 [Oryza sativa Japonica Group]
Unigene31996_Taxus	581	1375	184.24	409.65	1.15281	0	0	-	-	-	-
Unigene33626_Taxus	230	544	72.93	162.07	1.15203	2.32036e-13	3.37722e-12	-	-	-	gi|189189982|ref|XP_001931330.1|/4e-18/transcription elongation factor [Pyrenophora tritici-repentis Pt-1C-BFP] >gi|187972936|gb|EDU40435.1| transcription elongation factor [Pyrenophora tritici-repentis Pt-1C-BFP]
Unigene28201_Taxus	104	246	32.98	73.29	1.15202	9.7189e-13	1.31367e-11	-	-	-	-
Unigene2548_Taxus	52	123	16.49	36.64	1.15183	5.21344e-07	3.52209e-06	-	-	-	gi|256535783|gb|ACU82368.1|/8e-06/cation exchanger 2 [Cucumis sativus]
Unigene29492_Taxus	244	577	77.37	171.9	1.15172	1.43219e-13	2.14227e-12	-	-	-	-
Unigene20372_Taxus	204	482	64.69	143.6	1.15044	7.0166e-14	1.11211e-12	-	-	-	gi|41469318|gb|AAS07174.1|/5e-09/expressed protein [Oryza sativa Japonica Group] >gi|108709507|gb|ABF97302.1| expressed protein [Oryza sativa (japonica cultivar-group)] >gi|108709508|gb|ABF97303.1| expressed protein [Oryza sativa (japonica cultivar-group)]
Unigene23755_Taxus	36	85	11.42	25.32	1.14871	3.23262e-05	0.000158125	-	-	-	-
Unigene10506_Taxus	92	217	29.17	64.65	1.14816	2.76154e-11	3.20084e-10	-	-	-	-
Unigene6171_Taxus	42	99	13.32	29.49	1.14663	7.39754e-06	4.08896e-05	-	-	-	gi|115455589|ref|NP_001051395.1|/4e-06/Os03g0769400 [Oryza sativa (japonica cultivar-group)] >gi|40539077|gb|AAR87334.1| expressed protein [Oryza sativa Japonica Group] >gi|50872443|gb|AAT85043.1| expressed protein [Oryza sativa Japonica Group] >gi|113549866|dbj|BAF13309.1| Os03g0769400 [Oryza sativa Japonica Group]
Unigene6370_Taxus	118	278	37.42	82.82	1.14617	0	0	-	-	-	-
Unigene14565_Taxus	45	106	14.27	31.58	1.14603	3.55044e-06	2.05762e-05	-	GO:0004871//signal transducer activity;GO:0005515//protein binding	GO:0007165//signal transduction;GO:0006355//regulation of transcription, DNA-dependent	gi|110832734|sp|Q2R2W1.2|ADO3_ORYSJ/0.0/RecName: Full=Adagio-like protein 3 >gi|255680164|dbj|BAF28431.2| Os11g0547000 [Oryza sativa Japonica Group]
Unigene28097_Taxus	1355	3191	429.68	950.68	1.1457	3.1224e-12	3.95349e-11	-	-	-	gi|156634596|gb|ABU91297.1|/5e-16/iron-deficiency-responsive protein [Sonneratia caseolaris] >gi|156634598|gb|ABU91298.1| iron-deficiency-responsive protein [Sonneratia caseolaris] >gi|156634600|gb|ABU91299.1| iron-deficiency-responsive protein [Sonneratia caseolaris] >gi|156634602|gb|ABU91300.1| iron-deficiency-responsive protein [Sonneratia caseolaris] >gi|156634604|gb|ABU91301.1| iron-deficien…
Unigene35772_Taxus	48	113	15.22	33.67	1.1455	1.70717e-06	1.05565e-05	-	-	-	gi|224713626|gb|ACN62086.1|/1e-38/response regulator 1 [Pinus pinea]
Unigene31167_Taxus	144	339	45.66	101	1.14535	1.44329e-14	2.45346e-13	-	-	-	gi|87162599|gb|ABD28394.1|/8e-06/Embryo-specific 3 [Medicago truncatula]
Unigene20757_Taxus	54	127	17.12	37.84	1.14423	3.96572e-07	2.72988e-06	-	-	-	gi|171702849|dbj|BAG16380.1|/6e-37/GRAS family transcription factor [Brassica rapa var. perviridis]
Unigene34892_Taxus	222	521	70.4	155.22	1.14067	0	0	-	-	-	gi|116790054|gb|ABK25485.1|/5e-07/unknown [Picea sitchensis]
Unigene16486_Taxus	113	265	35.83	78.95	1.13977	4.24772e-13	5.96321e-12	GO:0009536//plastid	GO:0016829//lyase activity	-	gi|169057|gb|AAA33652.1|/7e-78/carbonic anhydrase [Pisum sativum] >gi|227784|prf||1710354A carbonic anhydrase
Unigene16968_Taxus	62	145	19.66	43.2	1.13577	7.04442e-08	5.45874e-07	-	-	-	-
Unigene19726_Taxus	80	187	25.37	55.71	1.13481	9.19932e-10	8.99483e-09	-	-	-	-
Unigene28744_Taxus	33	77	10.46	22.94	1.13298	9.3646e-05	0.000412334	-	-	-	gi|116789392|gb|ABK25235.1|/3e-27/unknown [Picea sitchensis]
Unigene11219_Taxus	201	469	63.74	139.73	1.13237	0	0	-	-	-	gi|22329792|ref|NP_173937.2|/5e-06/esterase-related [Arabidopsis thaliana]
Unigene5199_Taxus	66	154	20.93	45.88	1.13229	2.97484e-08	2.41443e-07	-	-	-	gi|19115685|ref|NP_594773.1|/6e-43/human amsh protein homolog [Schizosaccharomyces pombe] >gi|74638626|sp|Q9P371.1|SST2_SCHPO RecName: Full=AMSH-like protease sst2; AltName: Full=Suppressor of ste12 deletion protein 2 >gi|9588467|emb|CAC00558.1| human AMSH protein homolog [Schizosaccharomyces pombe]
Unigene35928_Taxus	39	91	12.37	27.11	1.13198	2.12702e-05	0.000107926	-	-	-	gi|238841493|gb|EEQ31155.1|/3e-29/mRNA turnover protein 4 [Microsporum canis CBS 113480]
Unigene18028_Taxus	57	133	18.08	39.62	1.13183	2.62652e-07	1.85607e-06	-	-	-	gi|115439161|ref|NP_001043860.1|/4e-27/Os01g0678700 [Oryza sativa (japonica cultivar-group)] >gi|29367575|gb|AAO72649.1| DP protein [Oryza sativa Japonica Group] >gi|113533391|dbj|BAF05774.1| Os01g0678700 [Oryza sativa Japonica Group]
Unigene984_Taxus	37	86	11.73	25.62	1.12707	3.87176e-05	0.000185169	GO:0005739//mitochondrion;GO:0009536//plastid	-	-	gi|226282247|gb|EEH37813.1|/3e-29/ATP-dependent RNA helicase DED1 [Paracoccidioides brasiliensis Pb01]
Unigene14925_Taxus	91	211	28.86	62.86	1.12307	1.10182e-10	1.19035e-09	-	-	-	gi|149247583|ref|XP_001528200.1|/8e-53/protein SUR2 [Lodderomyces elongisporus NRRL YB-4239] >gi|146448154|gb|EDK42542.1| protein SUR2 [Lodderomyces elongisporus NRRL YB-4239]
Unigene21274_Taxus	164	379	52.01	112.91	1.11831	4.75176e-14	7.70269e-13	-	-	-	gi|75273141|sp|Q9LDA7.1|P2C39_ARATH/2e-83/RecName: Full=Probable protein phosphatase 2C 39; Short=AtPP2C39 >gi|9294253|dbj|BAB02155.1| protein phosphatase type 2C [Arabidopsis thaliana]
Unigene35064_Taxus	140	323	44.39	96.23	1.11625	0	0	-	-	-	gi|8778323|gb|AAF79332.1|AC002304_25/7e-06/F14J16.24 [Arabidopsis thaliana]
Unigene11650_Taxus	174	401	55.18	119.47	1.11443	3.13082e-14	5.19325e-13	-	-	-	gi|115475077|ref|NP_001061135.1|/6e-08/Os08g0179900 [Oryza sativa (japonica cultivar-group)] >gi|113623104|dbj|BAF23049.1| Os08g0179900 [Oryza sativa Japonica Group]
Unigene18440_Taxus	33	76	10.46	22.64	1.11399	0.000128811	0.000548333	-	-	-	gi|45185590|ref|NP_983306.1|/4e-52/ACL098Cp [Ashbya gossypii ATCC 10895] >gi|44981308|gb|AAS51130.1| ACL098Cp [Ashbya gossypii ATCC 10895]
Unigene29941_Taxus	98	225	31.08	67.03	1.10882	4.2303e-11	4.77887e-10	-	-	-	gi|115486503|ref|NP_001068395.1|/1e-10/Os11g0657200 [Oryza sativa (japonica cultivar-group)] >gi|113645617|dbj|BAF28758.1| Os11g0657200 [Oryza sativa Japonica Group]
Unigene13810_Taxus	129	296	40.91	88.19	1.10816	0	0	-	GO:0008270//zinc ion binding	GO:0051726//regulation of cell cycle;GO:0009615//response to virus;GO:0051603//proteolysis involved in cellular protein catabolic process	gi|50555780|ref|XP_505298.1|/1e-06/YALI0F11693p [Yarrowia lipolytica] >gi|49651168|emb|CAG78105.1| YALI0F11693p [Yarrowia lipolytica]
Unigene13847_Taxus	82	188	26	56.01	1.10717	1.7727e-09	1.66477e-08	GO:0005783//endoplasmic reticulum	-	GO:0016192//vesicle-mediated transport	gi|15220814|ref|NP_173212.1|/8e-25/PRA1.F1 (PRENYLATED RAB ACCEPTOR 1.F1) [Arabidopsis thaliana] >gi|75173367|sp|Q9FZ63.1|PR1F1_ARATH RecName: Full=PRA1 family protein F1; Short=AtPRA1.F1 >gi|9802742|gb|AAF99811.1|AC034257_3 Unknown protein [Arabidopsis thaliana] >gi|46931216|gb|AAT06412.1| At1g17700 [Arabidopsis thaliana] >gi|48310324|gb|AAT41798.1| At1g17700 [Arabidopsis thaliana]
Unigene35411_Taxus	151	346	47.88	103.08	1.10627	0	0	-	-	-	gi|183979104|emb|CAP08301.1|/1e-06/DNA-binding protein [Vitis thunbergii]
Unigene13536_Taxus	45	103	14.27	30.69	1.10478	9.15146e-06	4.93891e-05	-	-	-	gi|30693221|ref|NP_174791.2|/1e-162/CINV1 (cytosolic invertase 1); beta-fructofuranosidase [Arabidopsis thaliana] >gi|30693225|ref|NP_849750.1| CINV1 (cytosolic invertase 1); beta-fructofuranosidase [Arabidopsis thaliana] >gi|8778348|gb|AAF79356.1|AC007887_15 F15O4.33 [Arabidopsis thaliana]
Unigene29614_Taxus	135	309	42.81	92.06	1.10463	1.21458e-13	1.83683e-12	-	-	-	-
Unigene30373_Taxus	87	199	27.59	59.29	1.10364	6.54442e-10	6.52063e-09	-	-	-	gi|194477106|ref|YP_002049285.1|/1e-35/FeS assembly ATPase SufC [Paulinella chromatophora] >gi|171192113|gb|ACB43075.1| FeS assembly ATPase SufC [Paulinella chromatophora]
Unigene10447_Taxus	99	226	31.39	67.33	1.10094	5.00818e-11	5.62907e-10	-	-	-	gi|195646832|gb|ACG42884.1|/2e-52/AT-hook protein 1 [Zea mays]
Unigene35182_Taxus	50	114	15.86	33.96	1.09844	3.31536e-06	1.94095e-05	-	-	-	gi|225678864|gb|EEH17148.1|/2e-33/glutamine amidotransferase subunit pdxT [Paracoccidioides brasiliensis Pb03]
Unigene30624_Taxus	90	205	28.54	61.07	1.09748	4.3241e-10	4.38689e-09	-	-	-	-
Unigene31195_Taxus	51	116	16.17	34.56	1.09578	2.87962e-06	1.69813e-05	-	-	-	gi|18416540|ref|NP_567718.1|/3e-12/Clp amino terminal domain-containing protein [Arabidopsis thaliana] >gi|195604812|gb|ACG24236.1| ATP-dependent Clp protease ATP-binding subunit clpA [Zea mays]
Unigene30406_Taxus	62	141	19.66	42.01	1.09547	2.44194e-07	1.7325e-06	-	-	-	-
Unigene20330_Taxus	33	75	10.46	22.34	1.09475	0.000176554	0.000728419	-	-	-	gi|115439279|ref|NP_001043919.1|/4e-06/Os01g0688600 [Oryza sativa (japonica cultivar-group)] >gi|113533450|dbj|BAF05833.1| Os01g0688600 [Oryza sativa Japonica Group]
Unigene31973_Taxus	44	100	13.95	29.79	1.09456	1.43854e-05	7.51765e-05	-	-	-	gi|116788780|gb|ABK24998.1|/9e-31/unknown [Picea sitchensis]
Unigene19100_Taxus	61	138	19.34	41.11	1.0879	3.81572e-07	2.63273e-06	-	-	-	gi|115446297|ref|NP_001046928.1|/5e-09/Os02g0509600 [Oryza sativa (japonica cultivar-group)] >gi|113536459|dbj|BAF08842.1| Os02g0509600 [Oryza sativa Japonica Group]
Unigene12167_Taxus	332	751	105.28	223.74	1.08759	0	0	-	-	-	gi|223697652|gb|ACN18278.1|/4e-97/hypersensitive induced reaction protein 2 [Triticum aestivum]
Unigene19538_Taxus	73	165	23.15	49.16	1.08647	2.84842e-08	2.31499e-07	-	-	-	gi|115441335|ref|NP_001044947.1|/1e-07/Os01g0872700 [Oryza sativa (japonica cultivar-group)] >gi|113534478|dbj|BAF06861.1| Os01g0872700 [Oryza sativa Japonica Group]
Unigene18018_Taxus	46	104	14.59	30.98	1.08636	1.08269e-05	5.75936e-05	-	-	-	-
Unigene24070_Taxus	104	235	32.98	70.01	1.08597	3.38416e-11	3.88209e-10	-	-	-	-
Unigene21456_Taxus	39	88	12.37	26.22	1.08382	5.45512e-05	0.00025394	-	-	-	gi|226528667|ref|NP_001149281.1|/1e-06/dnaJ domain containing protein [Zea mays] >gi|195626008|gb|ACG34834.1| dnaJ domain containing protein [Zea mays]
Unigene4550_Taxus	114	257	36.15	76.57	1.08278	4.68802e-12	5.81595e-11	-	-	-	gi|229619540|dbj|BAH58100.1|/1e-48/Dof zinc finger protein [Ipomoea batatas]
Unigene11352_Taxus	76	171	24.1	50.95	1.08005	1.87228e-08	1.56082e-07	-	-	-	-
Unigene29453_Taxus	248	558	78.64	166.24	1.07993	0	0	-	-	-	-
Unigene33243_Taxus	36	81	11.42	24.13	1.07927	0.000114502	0.000493553	GO:0009536//plastid	GO:0004794//L-threonine ammonia-lyase activity;GO:0003700//sequence-specific DNA binding transcription factor activity	GO:0006355//regulation of transcription, DNA-dependent;GO:0009097//isoleucine biosynthetic process	gi|225556803|gb|EEH05091.1|/6e-21/threonine dehydratase [Ajellomyces capsulatus G186AR]
Unigene32893_Taxus	233	524	73.89	156.11	1.07911	0	0	-	-	-	gi|115444879|ref|NP_001046219.1|/2e-22/Os02g0200000 [Oryza sativa (japonica cultivar-group)] >gi|113535750|dbj|BAF08133.1| Os02g0200000 [Oryza sativa Japonica Group]
Unigene33196_Taxus	61	137	19.34	40.82	1.07769	5.17336e-07	3.49634e-06	-	-	-	-
Unigene19772_Taxus	37	83	11.73	24.73	1.07606	9.90948e-05	0.000433327	-	-	-	gi|255679505|dbj|BAF26809.2|/6e-20/Os10g0485300 [Oryza sativa Japonica Group]
Unigene29102_Taxus	516	1156	163.63	344.4	1.07365	0	0	-	-	-	-
Unigene16437_Taxus	34	76	10.78	22.64	1.07052	0.00020845	0.000847066	-	-	-	gi|3342211|gb|AAC50047.1|/3e-35/Pti4 [Solanum lycopersicum]
Unigene33114_Taxus	268	599	84.98	178.46	1.07041	0	0	-	-	-	-
Unigene36320_Taxus	60	134	19.03	39.92	1.06884	8.06562e-07	5.29046e-06	-	-	-	gi|263429453|sp|A8Q0M1.1|GET3_MALGO/3e-42/RecName: Full=ATPase GET3; AltName: Full=Arsenite-stimulated ATPase; AltName: Full=Arsenical pump-driving ATPase; AltName: Full=Golgi to ER traffic protein 3; AltName: Full=Guided entry of tail-anchored proteins 3
Unigene26429_Taxus	43	96	13.64	28.6	1.06817	3.06998e-05	0.000151166	-	-	-	-
Unigene27449_Taxus	43	96	13.64	28.6	1.06817	3.06998e-05	0.000151124	-	-	-	-
Unigene32594_Taxus	40	89	12.68	26.52	1.06453	6.42116e-05	0.000295131	-	-	-	-
Unigene27179_Taxus	244	543	77.37	161.77	1.0641	1.43219e-13	2.14407e-12	-	-	-	-
Unigene7443_Taxus	95	211	30.13	62.86	1.06094	7.17998e-10	7.13393e-09	-	-	-	-
Unigene25318_Taxus	150	333	47.57	99.21	1.06043	0	0	-	-	-	-
Unigene17044_Taxus	41	91	13	27.11	1.06031	5.55604e-05	0.000257561	-	-	-	gi|115449637|ref|NP_001048515.1|/9e-23/Os02g0816700 [Oryza sativa (japonica cultivar-group)] >gi|113538046|dbj|BAF10429.1| Os02g0816700 [Oryza sativa Japonica Group]
Unigene15346_Taxus	183	406	58.03	120.96	1.05966	2.15828e-13	3.16459e-12	-	-	-	gi|21553988|gb|AAM63069.1|/1e-30/zinc finger protein OBP4-like [Arabidopsis thaliana]
Unigene35898_Taxus	220	488	69.76	145.39	1.05946	2.57572e-13	3.7125e-12	-	-	-	gi|115459848|ref|NP_001053524.1|/5e-66/Os04g0556300 [Oryza sativa (japonica cultivar-group)] >gi|21360380|gb|AAM47493.1| glutathione peroxidase 1 [Oryza sativa] >gi|113565095|dbj|BAF15438.1| Os04g0556300 [Oryza sativa Japonica Group]
Unigene5122_Taxus	37	82	11.73	24.43	1.05845	0.000134661	0.000571185	-	-	GO:0006281//DNA repair	gi|18399721|ref|NP_566433.1|/2e-47/methyladenine glycosylase family protein [Arabidopsis thaliana] >gi|11994413|dbj|BAB02415.1| DNA-3-methyladenine glycosidase I-like protein [Arabidopsis thaliana]
Unigene21958_Taxus	97	215	30.76	64.05	1.05814	5.42414e-10	5.46247e-09	-	-	-	-
Unigene16658_Taxus	251	556	79.59	165.65	1.05748	0	0	-	-	-	-
Unigene13467_Taxus	71	157	22.51	46.77	1.05502	1.2569e-07	9.38462e-07	-	-	-	-
Unigene8_Taxus	120	265	38.05	78.95	1.05304	6.44796e-12	7.91119e-11	-	-	-	gi|226492718|ref|NP_001151758.1|/7e-06/LOC100285393 [Zea mays] >gi|195649545|gb|ACG44240.1| acylamino-acid-releasing enzyme [Zea mays]
Unigene35995_Taxus	77	170	24.42	50.65	1.0525	3.99274e-08	3.20264e-07	-	-	-	gi|115452325|ref|NP_001049763.1|/6e-20/Os03g0284600 [Oryza sativa (japonica cultivar-group)] >gi|113548234|dbj|BAF11677.1| Os03g0284600 [Oryza sativa Japonica Group]
Unigene9346_Taxus	87	192	27.59	57.2	1.05187	5.37854e-09	4.78615e-08	-	-	-	gi|149243951|ref|XP_001526552.1|/2e-25/peptide methionine sulfoxide reductase msrB [Lodderomyces elongisporus NRRL YB-4239] >gi|146448946|gb|EDK43202.1| peptide methionine sulfoxide reductase msrB [Lodderomyces elongisporus NRRL YB-4239]
Unigene36118_Taxus	63	139	19.98	41.41	1.05142	7.10688e-07	4.69792e-06	-	-	-	gi|255935775|ref|XP_002558914.1|/2e-08/Pc13g04790 [Penicillium chrysogenum Wisconsin 54-1255] >gi|211583534|emb|CAP91548.1| Pc13g04790 [Penicillium chrysogenum Wisconsin 54-1255]
Unigene29354_Taxus	161	355	51.05	105.76	1.05081	0	0	-	-	-	-
Unigene23712_Taxus	44	97	13.95	28.9	1.0508	3.59876e-05	0.000174978	-	-	-	-
Unigene20918_Taxus	79	174	25.05	51.84	1.04926	3.0084e-08	2.44056e-07	-	-	-	gi|57231736|gb|AAW47581.1|/1e-170/diacylglycerol acyltransferase [Oryza sativa Japonica Group] >gi|255676114|dbj|BAF16783.2| Os05g0196800 [Oryza sativa Japonica Group]
Unigene19327_Taxus	60	132	19.03	39.33	1.04735	1.46883e-06	9.14935e-06	-	-	-	gi|68160373|gb|AAY86761.1|/6e-08/HIT family protein 1 [Chaetomium globosum]
Unigene35618_Taxus	95	209	30.13	62.27	1.04734	1.29666e-09	1.2426e-08	-	-	-	gi|195624584|gb|ACG34122.1|/5e-48/ribonucleoprotein [Zea mays]
Unigene18630_Taxus	35	77	11.1	22.94	1.04731	0.000244592	0.00098184	-	-	-	gi|115448187|ref|NP_001047873.1|/1e-41/Os02g0706900 [Oryza sativa (japonica cultivar-group)]
Unigene19627_Taxus	45	99	14.27	29.49	1.04724	3.11364e-05	0.000153188	-	-	-	gi|148908699|gb|ABR17457.1|/2e-23/unknown [Picea sitchensis]
Unigene32212_Taxus	131	288	41.54	85.8	1.04648	1.08402e-12	1.45093e-11	-	-	-	gi|116779025|gb|ABK21105.1|/1e-07/unknown [Picea sitchensis] >gi|116780200|gb|ABK21586.1| unknown [Picea sitchensis]
Unigene27276_Taxus	51	112	16.17	33.37	1.04523	9.70098e-06	5.21494e-05	-	-	-	gi|148906151|gb|ABR16233.1|/4e-07/unknown [Picea sitchensis]
Unigene28673_Taxus	170	373	53.91	111.13	1.04362	2.70228e-13	3.86986e-12	-	-	-	-
Unigene16105_Taxus	67	147	21.25	43.8	1.04347	4.01802e-07	2.76055e-06	-	-	-	gi|116059478|emb|CAL55185.1|/1e-41/tRNA/rRNA methyltransferase (ISS) [Ostreococcus tauri]
Unigene36313_Taxus	52	114	16.49	33.96	1.04225	8.39906e-06	4.58002e-05	-	-	-	gi|162312494|ref|XP_001713087.1|/4e-20/TPR repeat protein [Schizosaccharomyces pombe] >gi|74675927|sp|O13797.1|SGT2_SCHPO RecName: Full=Small glutamine-rich tetratricopeptide repeat-containing protein 2 >gi|7211050|emb|CAB77009.1| TPR repeat protein, SGT family [Schizosaccharomyces pombe]
Unigene10610_Taxus	142	311	45.03	92.66	1.04106	3.606e-13	5.09848e-12	-	-	-	gi|32815065|gb|AAP86247.2|/2e-11/glycinamide ribonucleotide transformylase [Glycine max]
Unigene21979_Taxus	180	394	57.08	117.38	1.04013	2.14496e-13	3.15284e-12	-	-	-	-
Unigene35512_Taxus	54	118	17.12	35.16	1.03825	6.29578e-06	3.51266e-05	-	-	-	gi|115455013|ref|NP_001051107.1|/1e-10/Os03g0722000 [Oryza sativa (japonica cultivar-group)] >gi|50540699|gb|AAT77856.1| expressed protein [Oryza sativa Japonica Group] >gi|108710801|gb|ABF98596.1| expressed protein [Oryza sativa (japonica cultivar-group)] >gi|113549578|dbj|BAF13021.1| Os03g0722000 [Oryza sativa Japonica Group]
Unigene10723_Taxus	43	94	13.64	28.01	1.0381	5.61872e-05	0.000260264	-	-	-	gi|186510757|ref|NP_190363.3|/2e-40/ATATH7; ATPase, coupled to transmembrane movement of substances / transporter [Arabidopsis thaliana] >gi|20466398|gb|AAM20516.1| ABC-type transport protein-like protein [Arabidopsis thaliana]
Unigene33578_Taxus	70	153	22.2	45.58	1.03784	2.61908e-07	1.85154e-06	-	-	-	gi|213407262|ref|XP_002174402.1|/5e-12/3-isopropylmalate dehydratase [Schizosaccharomyces japonicus yFS275] >gi|212002449|gb|EEB08109.1| 3-isopropylmalate dehydratase [Schizosaccharomyces japonicus yFS275]
Unigene35700_Taxus	38	83	12.05	24.73	1.03723	0.000157485	0.000660452	-	-	-	gi|115461540|ref|NP_001054370.1|/1e-33/Os04g0692600 [Oryza sativa (japonica cultivar-group)] >gi|113565941|dbj|BAF16284.1| Os04g0692600 [Oryza sativa Japonica Group]
Unigene6179_Taxus	38	83	12.05	24.73	1.03723	0.000157485	0.000660296	-	-	-	gi|18399413|ref|NP_566406.1|/2e-10/universal stress protein (USP) family protein [Arabidopsis thaliana]
Unigene32866_Taxus	46	100	14.59	29.79	1.02985	3.63006e-05	0.000176307	-	-	-	gi|255670510|dbj|BAF30368.2|/8e-17/Os12g0633000 [Oryza sativa Japonica Group]
Unigene4558_Taxus	1133	2461	359.28	733.2	1.0291	1.65423e-12	2.15583e-11	-	GO:0003824//catalytic activity	GO:0008152//metabolic process	gi|42570875|ref|NP_973511.1|/3e-47/NIC1 (NICOTINAMIDASE 1); catalytic/ nicotinamidase [Arabidopsis thaliana]
Unigene5820_Taxus	122	265	38.69	78.95	1.02898	1.60918e-11	1.89977e-10	-	-	-	gi|255674734|dbj|BAF12648.2|/6e-21/Os03g0639200 [Oryza sativa Japonica Group]
Unigene17524_Taxus	41	89	13	26.52	1.02857	0.000101436	0.000443131	-	-	-	gi|4263518|gb|AAD15344.1|/9e-27/similar to PHZF, catalyzing the hydroxylation of phenazine-1-carboxylic acid to 2-hydroxy-phenazine-1-carboxylic acid [Arabidopsis thaliana]
Unigene2071_Taxus	76	165	24.1	49.16	1.02845	1.11232e-07	8.38242e-07	GO:0009501//amyloplast;GO:0009507//chloroplast	GO:0009011//starch synthase activity	GO:0019252//starch biosynthetic process	gi|450485|dbj|BAA03739.1|/0.0/soluble starch synthase precursor [Oryza sativa]
Unigene8142_Taxus	48	104	15.22	30.98	1.02537	2.71322e-05	0.000134791	-	-	-	gi|261358491|gb|EEY20919.1|/9e-21/RNA polymerase II elongator complex subunit [Verticillium albo-atrum VaMs.102]
Unigene25588_Taxus	84	182	26.64	54.22	1.02523	2.65694e-08	2.16728e-07	-	-	-	-
Unigene26084_Taxus	115	249	36.47	74.18	1.02432	7.69318e-11	8.48106e-10	-	-	GO:0001666//response to hypoxia	gi|226507966|ref|NP_001148018.1|/4e-15/hypoxia induced protein conserved region containing protein [Zea mays] >gi|195615176|gb|ACG29418.1| hypoxia induced protein conserved region containing protein [Zea mays] >gi|195618772|gb|ACG31216.1| hypoxia induced protein conserved region containing protein [Zea mays]
Unigene20724_Taxus	67	145	21.25	43.2	1.02357	7.23092e-07	4.7746e-06	-	-	-	gi|255672945|dbj|BAF04136.2|/1e-103/Os01g0182900 [Oryza sativa Japonica Group]
Unigene20014_Taxus	99	214	31.39	63.76	1.02235	1.76461e-09	1.65804e-08	-	-	-	gi|87240366|gb|ABD32224.1|/3e-20/Calcium-binding EF-hand [Medicago truncatula]
Unigene28038_Taxus	63	136	19.98	40.52	1.02008	1.72082e-06	1.06335e-05	-	-	-	gi|116787216|gb|ABK24415.1|/5e-23/unknown [Picea sitchensis]
Unigene33197_Taxus	146	315	46.3	93.85	1.01934	2.48912e-13	3.60225e-12	-	-	-	gi|115486125|ref|NP_001068206.1|/3e-08/Os11g0594700 [Oryza sativa (japonica cultivar-group)] >gi|77551828|gb|ABA94625.1| expressed protein [Oryza sativa (japonica cultivar-group)] >gi|113645428|dbj|BAF28569.1| Os11g0594700 [Oryza sativa Japonica Group]
Unigene16325_Taxus	83	179	26.32	53.33	1.01879	4.094e-08	3.27943e-07	GO:0009533//chloroplast stromal thylakoid;GO:0009535//chloroplast thylakoid membrane	GO:0020037//heme binding;GO:0016688//L-ascorbate peroxidase activity	GO:0006979//response to oxidative stress;GO:0055114//oxidation reduction	gi|25992557|gb|AAN77158.1|/9e-10/thylakoid-bound ascorbate peroxidase [Triticum aestivum]
Unigene20012_Taxus	45	97	14.27	28.9	1.01808	5.64622e-05	0.000261334	-	-	-	gi|117950167|gb|ABK58467.1|/5e-08/LIM domain protein WLIM1a [Populus tremula x Populus alba]
Unigene29053_Taxus	40	86	12.68	25.62	1.01472	0.000158079	0.000662162	-	-	-	gi|186520894|ref|NP_196330.3|/8e-11/LAC13 (laccase 13); laccase [Arabidopsis thaliana] >gi|75335658|sp|Q9LYQ2.1|LAC13_ARATH RecName: Full=Laccase-13; AltName: Full=Benzenediol:oxygen oxidoreductase 13; AltName: Full=Urishiol oxidase 13; AltName: Full=Diphenol oxidase 13; Flags: Precursor >gi|7546691|emb|CAB87269.1| laccase-like protein [Arabidopsis thaliana]
Unigene26425_Taxus	54	116	17.12	34.56	1.01342	1.13376e-05	6.02382e-05	-	-	-	gi|168017549|ref|XP_001761310.1|/5e-07/predicted protein [Physcomitrella patens subsp. patens] >gi|162687650|gb|EDQ74032.1| predicted protein [Physcomitrella patens subsp. patens]
Unigene29514_Taxus	68	146	21.56	43.5	1.01266	8.3736e-07	5.47635e-06	-	-	-	gi|159468724|ref|XP_001692524.1|/2e-08/Qb-SNARE protein, NPSN-family [Chlamydomonas reinhardtii] >gi|158278237|gb|EDP04002.1| Qb-SNARE protein, NPSN-family [Chlamydomonas reinhardtii]
Unigene18090_Taxus	154	330	48.83	98.32	1.00972	2.36256e-13	3.43584e-12	-	-	-	gi|254798687|ref|YP_003058304.1|/2e-56/translational elongation factor Tu [Parachlorella kessleri] >gi|229915635|gb|ACQ90978.1| translational elongation factor Tu [Parachlorella kessleri]
Unigene26328_Taxus	793	1698	251.47	505.88	1.00841	0	0	-	-	-	-
Unigene20026_Taxus	179	383	56.76	114.11	1.00748	0	0	-	-	-	gi|255679990|dbj|BAF28040.2|/0.0/Os11g0271100 [Oryza sativa Japonica Group]
Unigene112_Taxus	159	340	50.42	101.3	1.00657	5.10702e-14	8.21875e-13	-	-	-	gi|259486916|tpe|CBF85164.1|/5e-42/TPA: succinate semialdehyde dehydrogenase (Eurofung) [Aspergillus nidulans FGSC A4]
Unigene20162_Taxus	101	216	32.03	64.35	1.00652	2.35664e-09	2.18892e-08	-	-	-	gi|121699054|ref|XP_001267895.1|/1e-05/F-box domain protein [Aspergillus clavatus NRRL 1] >gi|119396037|gb|EAW06469.1| F-box domain protein [Aspergillus clavatus NRRL 1]
Unigene28896_Taxus	138	295	43.76	87.89	1.00609	3.0671e-12	3.88623e-11	-	-	-	gi|122938387|gb|ABM69039.1|/8e-06/expansin-like protein [Cunninghamia lanceolata]
Unigene33206_Taxus	74	158	23.47	47.07	1.00399	3.52966e-07	2.44959e-06	-	GO:0008270//zinc ion binding	-	gi|254586095|ref|XP_002498615.1|/3e-08/ZYRO0G14608p [Zygosaccharomyces rouxii] >gi|238941509|emb|CAR29682.1| ZYRO0G14608p [Zygosaccharomyces rouxii]
Unigene35343_Taxus	222	473	70.4	140.92	1.00123	0	0	-	-	-	gi|73921149|sp|Q9LV66.1|Y5848_ARATH/3e-18/RecName: Full=Uncharacterized protein At5g48480
Unigene22672_Taxus	46	98	14.59	29.2	1.00099	6.53488e-05	0.000300126	-	-	-	-
Unigene22503_Taxus	1020	0	323.45	0.01	-14.9813	0	0	-	-	-	-
Unigene12116_Taxus	413	0	130.96	0.01	-13.6768	9.5149e-131	5.24792e-129	-	-	-	gi|224054168|ref|XP_002298125.1|/7e-12/2-oxoglutarate-dependent dioxygenase [Populus trichocarpa] >gi|222845383|gb|EEE82930.1| 2-oxoglutarate-dependent dioxygenase [Populus trichocarpa]
Unigene10203_Taxus	353	0	111.94	0.01	-13.4504	7.34076e-112	3.91544e-110	-	-	-	gi|255670708|dbj|BAH91578.1|/3e-17/Os02g0208500 [Oryza sativa Japonica Group]
Unigene11490_Taxus	306	0	97.03	0.01	-13.2442	4.57954e-97	2.35793e-95	-	-	-	gi|115477322|ref|NP_001062257.1|/2e-19/Os08g0519100 [Oryza sativa (japonica cultivar-group)] >gi|42408510|dbj|BAD09689.1| oxidase-like [Oryza sativa Japonica Group] >gi|42408749|dbj|BAD09985.1| oxidase-like [Oryza sativa Japonica Group] >gi|113624226|dbj|BAF24171.1| Os08g0519100 [Oryza sativa Japonica Group]
Unigene8398_Taxus	286	0	90.69	0.01	-13.1467	9.049e-91	4.60594e-89	-	-	-	gi|15080737|gb|AAK83563.1|/3e-08/abietadiene synthase [Abies grandis]
Unigene31754_Taxus	237	0	75.15	0.01	-12.8756	2.4058e-75	1.16466e-73	-	-	-	gi|156145680|gb|ABU53653.1|/2e-25/caffeic acid O-3-methyltransferase [Populus deltoides]
Unigene13623_Taxus	229	0	72.62	0.01	-12.8262	7.93544e-73	3.74986e-71	-	-	-	gi|28558366|sp|Q9FT37.1|TASY_TAXCH/5e-94/RecName: Full=Taxadiene synthase; AltName: Full=Taxa-4(5),11(12)-diene synthase >gi|9965484|gb|AAG02257.1| taxadiene synthase [Taxus wallichiana var. chinensis]
Unigene23730_Taxus	227	0	71.98	0.01	-12.8134	3.3818e-72	1.59383e-70	-	GO:0005199//structural constituent of cell wall	GO:0009664//plant-type cell wall organization	gi|4033606|dbj|BAA35135.1|/2e-10/Extensin [Adiantum capillus-veneris]
Unigene34863_Taxus	218	0	69.13	0.01	-12.7551	2.30276e-69	1.06555e-67	-	-	-	gi|115435798|ref|NP_001042657.1|/1e-56/Os01g0263300 [Oryza sativa (japonica cultivar-group)] >gi|55700873|tpe|CAH69246.1| TPA: class III peroxidase 3 precursor [Oryza sativa (japonica cultivar-group)] >gi|113532188|dbj|BAF04571.1| Os01g0263300 [Oryza sativa Japonica Group]
Unigene34785_Taxus	214	0	67.86	0.01	-12.7283	4.1822e-68	1.90552e-66	-	-	-	gi|18390044|gb|AAL68831.1|AF463407_2/2e-29/Enod8.2 [Medicago truncatula]
Unigene33347_Taxus	196	0	62.15	0.01	-12.6015	1.93913e-62	8.55088e-61	-	GO:0016491//oxidoreductase activity	GO:0055114//oxidation reduction;GO:0006629//lipid metabolic process	gi|107785184|gb|ABF84063.1|/9e-55/microsomal oleate desaturase FAD2-3 [Glycine max]
Unigene16705_Taxus	196	0	62.15	0.01	-12.6015	1.93913e-62	8.52977e-61	-	-	-	gi|115469092|ref|NP_001058145.1|/2e-09/Os06g0636700 [Oryza sativa (japonica cultivar-group)] >gi|51535564|dbj|BAD37508.1| Anter-specific proline-rich protein APG precursor-like [Oryza sativa Japonica Group] >gi|113596185|dbj|BAF20059.1| Os06g0636700 [Oryza sativa Japonica Group]
Unigene9367_Taxus	185	0	58.66	0.01	-12.5182	5.6271e-59	2.39252e-57	-	-	-	-
Unigene19132_Taxus	176	0	55.81	0.01	-12.4463	3.83164e-56	1.59488e-54	-	-	-	gi|283135846|gb|ADB11314.1|/1e-33/tau class glutathione transferase GSTU9 [Populus trichocarpa]
Unigene13670_Taxus	139	0	44.08	0.01	-12.1059	1.7005e-44	6.44562e-43	-	-	-	gi|119224822|dbj|BAF41218.1|/1e-13/cytochrome P450 [Solanum lycopersicum]
Unigene17360_Taxus	135	0	42.81	0.01	-12.0637	3.0884e-43	1.15104e-41	-	-	-	-
Unigene35136_Taxus	134	0	42.49	0.01	-12.0529	6.3756e-43	2.37122e-41	-	-	-	-
Unigene19222_Taxus	133	0	42.18	0.01	-12.0423	1.31617e-42	4.84452e-41	-	-	-	gi|114797021|gb|ABI79448.1|/4e-07/apoplastic protein [Arnebia euchroma]
Unigene12274_Taxus	132	0	41.86	0.01	-12.0314	2.71706e-42	9.93931e-41	-	GO:0008810//cellulase activity	GO:0005975//carbohydrate metabolic process	gi|224057950|ref|XP_002299405.1|/0.0/endo-1,4-beta-glucanase [Populus trichocarpa] >gi|222846663|gb|EEE84210.1| endo-1,4-beta-glucanase [Populus trichocarpa]
Unigene16352_Taxus	126	0	39.96	0.01	-11.9643	2.10298e-40	7.55334e-39	-	-	-	-
Unigene34805_Taxus	123	0	39	0.01	-11.9293	1.85012e-39	6.56571e-38	-	-	-	gi|88771145|gb|ABD52122.1|/3e-17/dirigent-like protein pDIR11 [Picea sitchensis]
Unigene31719_Taxus	122	0	38.69	0.01	-11.9177	3.81934e-39	1.35003e-37	-	-	-	-
Unigene9101_Taxus	119	0	37.74	0.01	-11.8819	3.36012e-38	1.16687e-36	-	-	-	gi|224090738|ref|XP_002309069.1|/1e-133/laccase 110c [Populus trichocarpa] >gi|222855045|gb|EEE92592.1| laccase 110c [Populus trichocarpa]
Unigene13461_Taxus	113	0	35.83	0.01	-11.807	2.6007e-36	8.79155e-35	-	-	-	-
Unigene6429_Taxus	109	0	34.56	0.01	-11.7549	4.7233e-35	1.57872e-33	-	-	-	gi|18086341|gb|AAL57633.1|/1e-17/AT3g48690/T8P19_200 [Arabidopsis thaliana]
Unigene27226_Taxus	109	0	34.56	0.01	-11.7549	4.7233e-35	1.57576e-33	-	-	-	gi|15217644|ref|NP_174083.1|/1e-06/transferase family protein [Arabidopsis thaliana] >gi|5668772|gb|AAD45999.1|AC005916_11 Similar to gb|Z84571 anthranilate N-hydroxycinnamoyl/benzoyltransferase from Dianthus caryophyllus [Arabidopsis thaliana] >gi|6693014|gb|AAF24940.1|AC012375_3 T22C5.6 [Arabidopsis thaliana] >gi|50253446|gb|AAT71925.1| At1g27620 [Arabidopsis thaliana] >gi|53828625|gb|AAU94422.…
Unigene11534_Taxus	107	0	33.93	0.01	-11.7283	2.0129e-34	6.65303e-33	-	-	-	gi|158954535|gb|ABW84244.1|/1e-46/10-deacetylbaccatin III-10-O-acetyl transferase [Taxus brevifolia]
Unigene23564_Taxus	106	0	33.61	0.01	-11.7147	4.1554e-34	1.3709e-32	GO:0005737//cytoplasm	GO:0004356//glutamate-ammonia ligase activity	GO:0006542//glutamine biosynthetic process	gi|11386829|sp|Q43785.1|GLNA3_MEDSA/1e-29/RecName: Full=Glutamine synthetase nodule isozyme; AltName: Full=Glutamate--ammonia ligase >gi|561674|gb|AAB41554.1| cytosolic glutamine synthetase [Medicago sativa]
Unigene33198_Taxus	106	0	33.61	0.01	-11.7147	4.1554e-34	1.36836e-32	GO:0016023//cytoplasmic membrane-bounded vesicle	GO:0005199//structural constituent of cell wall	GO:0006869//lipid transport	gi|1709767|sp|Q00451.1|PRF1_SOLLC/5e-24/RecName: Full=36.4 kDa proline-rich protein >gi|19390|emb|CAA43666.1| proline rich protein [Solanum lycopersicum]
Unigene16718_Taxus	101	0	32.03	0.01	-11.6452	1.55796e-32	4.99192e-31	-	-	-	-
Unigene34728_Taxus	100	0	31.71	0.01	-11.6307	3.21622e-32	1.02683e-30	-	-	-	gi|3914360|sp|O04883.1|PLDA1_PIMBR/1e-57/RecName: Full=Phospholipase D alpha 1; Short=PLD alpha 1; AltName: Full=Choline phosphatase 1; AltName: Full=Phosphatidylcholine-hydrolyzing phospholipase D 1 >gi|2072351|gb|AAB70463.1| phospholipase D [Pimpinella brachycarpa]
Unigene35257_Taxus	86	0	27.27	0.01	-11.4131	8.2109e-28	2.38625e-26	-	-	-	gi|225459487|ref|XP_002284410.1|/7e-84/PREDICTED: similar to flavonol synthase [Vitis vinifera]
Unigene14478_Taxus	81	0	25.69	0.01	-11.327	3.07848e-26	8.65033e-25	-	GO:0009055//electron carrier activity;GO:0020037//heme binding;GO:0050597	GO:0042617;GO:0055114//oxidation reduction	gi|89242710|gb|ABD60225.1|/3e-45/ent-kaurenoic acid 13-hydroxylase [Stevia rebaudiana] >gi|189418962|gb|ACD93722.1| ent-kaurenoic acid 13-hydroxylase [Stevia rebaudiana]
Unigene19570_Taxus	79	0	25.05	0.01	-11.2906	1.31194e-25	3.6124e-24	-	-	-	gi|226498228|ref|NP_001147597.1|/2e-14/LOC100281206 [Zea mays] >gi|195612418|gb|ACG28039.1| L-ascorbate oxidase precursor [Zea mays]
Unigene18884_Taxus	77	0	24.42	0.01	-11.2538	5.59102e-25	1.52533e-23	-	-	-	gi|126567463|dbj|BAF48330.1|/5e-11/iron transporter protein IRT1 [Nicotiana tabacum]
Unigene21568_Taxus	72	0	22.83	0.01	-11.1567	2.09622e-23	5.42793e-22	-	-	-	-
Unigene12795_Taxus	69	0	21.88	0.01	-11.0954	1.84418e-22	4.66015e-21	-	-	-	gi|15227703|ref|NP_180570.1|/3e-07/GCN5-related N-acetyltransferase (GNAT) family protein [Arabidopsis thaliana] >gi|3150411|gb|AAC16963.1| hookless1-like protein [Arabidopsis thaliana]
Unigene15705_Taxus	68	0	21.56	0.01	-11.0741	3.80708e-22	9.48575e-21	-	-	-	gi|148907922|gb|ABR17081.1|/4e-13/unknown [Picea sitchensis]
Unigene4063_Taxus	68	0	21.56	0.01	-11.0741	3.80708e-22	9.4725e-21	-	-	-	gi|15219870|ref|NP_173653.1|/1e-109/AtUGT85A2 (UDP-glucosyl transferase 85A2); UDP-glycosyltransferase/ glucuronosyltransferase/ transferase, transferring glycosyl groups [Arabidopsis thaliana] >gi|9392679|gb|AAF87256.1|AC068562_3 Identical to UDP-glucose glucosyltransferase from Arabidopsis thaliana gb|AB016819 and contains a UDP-glucosyl transferase PF|00201 domain. ESTs gb|T46254, gb|R83990, g…
Unigene21515_Taxus	67	0	21.25	0.01	-11.0532	7.85926e-22	1.93121e-20	-	-	-	gi|75165511|sp|Q94F40.1|GDL9_ARATH/2e-09/RecName: Full=GDSL esterase/lipase At1g28600; AltName: Full=Extracellular lipase At1g28600; Flags: Precursor >gi|14326570|gb|AAK60329.1|AF385739_1 At1g28600/F1K23_6 [Arabidopsis thaliana] >gi|22137320|gb|AAM91505.1| At1g28600/F1K23_6 [Arabidopsis thaliana]
Unigene20624_Taxus	62	0	19.66	0.01	-10.941	2.94664e-20	6.87099e-19	-	-	-	gi|219536307|gb|ACL18059.1|/3e-87/STK [Aegilops tauschii]
Unigene34753_Taxus	61	0	19.34	0.01	-10.9174	6.08296e-20	1.40373e-18	-	-	-	gi|224142651|ref|XP_002324668.1|/1e-55/cytochrome P450 [Populus trichocarpa] >gi|222866102|gb|EEF03233.1| cytochrome P450 [Populus trichocarpa]
Unigene35058_Taxus	61	0	19.34	0.01	-10.9174	6.08296e-20	1.40191e-18	-	-	-	gi|75994039|gb|ABA34055.1|/2e-43/pathogenesis-related protein 1 [Zea mays subsp. parviglumis] >gi|75994047|gb|ABA34059.1| pathogenesis-related protein 1 [Zea mays subsp. parviglumis] >gi|75994065|gb|ABA34068.1| pathogenesis-related protein 1 [Zea mays subsp. parviglumis] >gi|75994069|gb|ABA34070.1| pathogenesis-related protein 1 [Zea mays subsp. parviglumis] >gi|75994071|gb|ABA34071.1| pathogenes…
Unigene17570_Taxus	60	0	19.03	0.01	-10.8941	1.25575e-19	2.86443e-18	-	-	-	gi|38605343|sp|Q8LF99.2|XTH6_ARATH/6e-12/RecName: Full=Probable xyloglucan endotransglucosylase/hydrolase protein 6; Short=At-XTH6; Short=XTH-6; Flags: Precursor >gi|15982913|gb|AAL09803.1| AT5g65730/MPA24_8 [Arabidopsis thaliana] >gi|20334766|gb|AAM16244.1| AT5g65730/MPA24_8 [Arabidopsis thaliana] >gi|110742367|dbj|BAE99106.1| xyloglucan endotransglycosylase - like protein [Arabidopsis thaliana]
Unigene30389_Taxus	59	0	18.71	0.01	-10.8696	2.59234e-19	5.82378e-18	-	-	-	-
Unigene7022_Taxus	59	0	18.71	0.01	-10.8696	2.59234e-19	5.81644e-18	-	-	-	gi|115467082|ref|NP_001057140.1|/3e-40/Os06g0215600 [Oryza sativa (japonica cultivar-group)] >gi|113595180|dbj|BAF19054.1| Os06g0215600 [Oryza sativa Japonica Group]
Unigene21282_Taxus	59	0	18.71	0.01	-10.8696	2.59234e-19	5.80912e-18	-	-	-	gi|71480741|gb|AAK85402.2|/4e-23/beta-1,3-glucanase [Camellia sinensis]
Unigene19261_Taxus	57	0	18.08	0.01	-10.8202	1.10477e-18	2.40018e-17	-	-	-	gi|22208300|emb|CAD30841.1|/5e-06/soluble epoxide hydrolase [Brassica napus]
Unigene6093_Taxus	55	0	17.44	0.01	-10.7682	4.70814e-18	9.93786e-17	-	-	-	gi|152925780|gb|ABS32108.1|/7e-14/aldehyde oxidase 1 [Pisum sativum]
Unigene28660_Taxus	53	0	16.81	0.01	-10.7151	2.00644e-17	4.12281e-16	-	-	-	gi|224115584|ref|XP_002317072.1|/4e-14/cytochrome P450 [Populus trichocarpa] >gi|222860137|gb|EEE97684.1| cytochrome P450 [Populus trichocarpa]
Unigene9984_Taxus	53	0	16.81	0.01	-10.7151	2.00644e-17	4.11806e-16	-	-	-	gi|28866017|emb|CAD70172.1|/2e-38/farnesylated protein 2 [Hordeum vulgare subsp. vulgare]
Unigene6983_Taxus	52	0	16.49	0.01	-10.6874	4.14206e-17	8.33794e-16	-	-	-	gi|108706751|gb|ABF94546.1|/1e-07/acetyltransferase, GNAT family protein, expressed [Oryza sativa (japonica cultivar-group)]
Unigene26613_Taxus	51	0	16.17	0.01	-10.6591	8.55076e-17	1.69824e-15	-	-	-	gi|115459178|ref|NP_001053189.1|/2e-18/Os04g0494800 [Oryza sativa (japonica cultivar-group)] >gi|113564760|dbj|BAF15103.1| Os04g0494800 [Oryza sativa Japonica Group]
Unigene25993_Taxus	51	0	16.17	0.01	-10.6591	8.55076e-17	1.69635e-15	-	-	-	-
Unigene32321_Taxus	51	0	16.17	0.01	-10.6591	8.55076e-17	1.69446e-15	-	-	-	gi|30025164|gb|AAP04432.1|/1e-25/lipoxygenase 1 protein [Hordeum vulgare]
Unigene25513_Taxus	49	0	15.54	0.01	-10.6018	3.64404e-16	6.95805e-15	-	-	-	gi|22329033|ref|NP_194781.2|/9e-34/leucine-rich repeat family protein / protein kinase family protein [Arabidopsis thaliana] >gi|224589641|gb|ACN59353.1| leucine-rich repeat receptor-like protein kinase [Arabidopsis thaliana]
Unigene33969_Taxus	48	0	15.22	0.01	-10.5718	7.52266e-16	1.41517e-14	-	-	-	gi|115438761|ref|NP_001043660.1|/2e-53/Os01g0634600 [Oryza sativa (japonica cultivar-group)] >gi|20161819|dbj|BAB90734.1| pectinesterase-like [Oryza sativa Japonica Group]
Unigene30072_Taxus	48	0	15.22	0.01	-10.5718	7.52266e-16	1.41367e-14	-	-	-	gi|224071101|ref|XP_002303357.1|/2e-11/aquaporin, MIP family, TIP subfamily [Populus trichocarpa] >gi|222840789|gb|EEE78336.1| aquaporin, MIP family, TIP subfamily [Populus trichocarpa]
Unigene1885_Taxus	46	0	14.59	0.01	-10.5108	3.2059e-15	5.80418e-14	GO:0016020//membrane	GO:0016887//ATPase activity;GO:0005515//protein binding;GO:0000166//nucleotide binding	-	gi|224065781|ref|XP_002301961.1|/4e-17/multidrug/pheromone exporter, MDR family, ABC transporter family [Populus trichocarpa] >gi|222843687|gb|EEE81234.1| multidrug/pheromone exporter, MDR family, ABC transporter family [Populus trichocarpa]
Unigene12429_Taxus	45	0	14.27	0.01	-10.4788	6.61818e-15	1.1662e-13	GO:0016023//cytoplasmic membrane-bounded vesicle	-	-	gi|18400323|ref|NP_566483.1|/1e-55/subtilase family protein [Arabidopsis thaliana] >gi|9279572|dbj|BAB01030.1| subtilisin proteinase-like protein [Arabidopsis thaliana]
Unigene27544_Taxus	45	0	14.27	0.01	-10.4788	6.61818e-15	1.16505e-13	-	-	-	gi|115479153|ref|NP_001063170.1|/2e-13/Os09g0414900 [Oryza sativa (japonica cultivar-group)] >gi|113631403|dbj|BAF25084.1| Os09g0414900 [Oryza sativa Japonica Group]
Unigene9081_Taxus	45	0	14.27	0.01	-10.4788	6.61818e-15	1.1639e-13	-	-	-	gi|55700879|tpe|CAH69249.1|/3e-77/TPA: class III peroxidase 6 precursor [Oryza sativa (japonica cultivar-group)]
Unigene7596_Taxus	45	0	14.27	0.01	-10.4788	6.61818e-15	1.16275e-13	-	-	-	gi|224142367|ref|XP_002324530.1|/2e-37/hydroxycinnamoyl CoA shikimate/quinate hydroxycinnamoyltransferase [Populus trichocarpa] >gi|222865964|gb|EEF03095.1| hydroxycinnamoyl CoA shikimate/quinate hydroxycinnamoyltransferase [Populus trichocarpa]
Unigene29311_Taxus	45	0	14.27	0.01	-10.4788	6.61818e-15	1.1616e-13	-	-	-	gi|226289773|gb|EEH45257.1|/3e-45/40S ribosomal protein S3 [Paracoccidioides brasiliensis Pb18]
Unigene17807_Taxus	43	0	13.64	0.01	-10.4136	2.82044e-14	4.71795e-13	-	-	-	gi|51475032|gb|AAU04555.1|/7e-29/laccase-like multicopper oxidase 77 [Brassica napus]
Unigene26458_Taxus	41	0	13	0.01	-10.3443	1.20197e-13	1.82084e-12	-	-	-	gi|115443839|ref|NP_001045699.1|/7e-28/Os02g0119200 [Oryza sativa (japonica cultivar-group)] >gi|113535230|dbj|BAF07613.1| Os02g0119200 [Oryza sativa Japonica Group]
Unigene28693_Taxus	41	0	13	0.01	-10.3443	1.20197e-13	1.8193e-12	-	-	-	gi|559407|emb|CAA57285.1|/1e-39/ACC oxidase [Brassica oleracea]
Unigene6778_Taxus	40	0	12.68	0.01	-10.3083	2.48132e-13	3.5968e-12	-	-	-	gi|255678056|dbj|BAF22510.2|/8e-11/Os07g0671100 [Oryza sativa Japonica Group]
Unigene9572_Taxus	40	0	12.68	0.01	-10.3083	2.48132e-13	3.59388e-12	-	-	-	gi|90186655|gb|ABD91577.1|/1e-102/beta-1,3-glucanase [Medicago sativa]
Unigene28363_Taxus	39	0	12.37	0.01	-10.2726	5.12238e-13	7.11264e-12	-	-	-	-
Unigene17269_Taxus	39	0	12.37	0.01	-10.2726	5.12238e-13	7.1071e-12	-	-	-	gi|38605591|sp|Q8LNZ5.1|XTHB_PHAAN/6e-88/RecName: Full=Probable xyloglucan endotransglucosylase/hydrolase protein B; AltName: Full=VaXTH2; Flags: Precursor >gi|21734666|dbj|BAC03238.1| xyloglucan endotransglucosylase/hydrolase [Vigna angularis]
Unigene15371_Taxus	38	0	12.05	0.01	-10.2348	1.05745e-12	1.41963e-11	-	-	-	-
Unigene8277_Taxus	38	0	12.05	0.01	-10.2348	1.05745e-12	1.41856e-11	-	-	-	-
Unigene25478_Taxus	38	0	12.05	0.01	-10.2348	1.05745e-12	1.41749e-11	-	-	-	gi|148908179|gb|ABR17205.1|/1e-09/unknown [Picea sitchensis]
Unigene31583_Taxus	38	0	12.05	0.01	-10.2348	1.05745e-12	1.41643e-11	-	-	-	-
Unigene14866_Taxus	37	0	11.73	0.01	-10.196	2.18298e-12	2.81199e-11	-	-	-	-
Unigene12826_Taxus	37	0	11.73	0.01	-10.196	2.18298e-12	2.80996e-11	-	-	-	gi|5915842|sp|P93147.2|C81E1_GLYEC/1e-40/RecName: Full=Isoflavone 2'-hydroxylase; AltName: Full=Cytochrome P450 81E1; AltName: Full=Cytochrome P450 91A4; AltName: Full=CYP GE-3 >gi|2443348|dbj|BAA22422.1| cytochrome P450 [Glycyrrhiza echinata]
Unigene19860_Taxus	36	0	11.42	0.01	-10.1573	4.5065e-12	5.61029e-11	-	-	-	gi|15230829|ref|NP_189165.1|/9e-16/proton-dependent oligopeptide transport (POT) family protein [Arabidopsis thaliana] >gi|9294185|dbj|BAB02087.1| peptide transporter-like protein [Arabidopsis thaliana]
Unigene18106_Taxus	36	0	11.42	0.01	-10.1573	4.5065e-12	5.60638e-11	-	-	-	-
Unigene3648_Taxus	35	0	11.1	0.01	-10.1163	9.3031e-12	1.11907e-10	-	-	-	gi|14573457|gb|AAK68073.1|AF384969_1/8e-66/somatic embryogenesis receptor-like kinase 2 [Arabidopsis thaliana]
Unigene4414_Taxus	35	0	11.1	0.01	-10.1163	9.3031e-12	1.11832e-10	-	-	-	-
Unigene1479_Taxus	34	0	10.78	0.01	-10.0741	1.92051e-11	2.25536e-10	-	-	-	gi|87240453|gb|ABD32311.1|/9e-20/2-S globulin [Medicago truncatula]
Unigene18076_Taxus	34	0	10.78	0.01	-10.0741	1.92051e-11	2.25388e-10	-	-	-	gi|678547|gb|AAA65637.1|/3e-31/peroxidase [Solanum lycopersicum]
Unigene10439_Taxus	34	0	10.78	0.01	-10.0741	1.92051e-11	2.2524e-10	-	-	-	gi|225466269|ref|XP_002272053.1|/4e-16/PREDICTED: similar to glutathione S-transferase [Vitis vinifera]
Unigene4523_Taxus	33	0	10.46	0.01	-10.0307	3.96466e-11	4.49303e-10	-	-	-	gi|40714037|dbj|BAD06943.1|/4e-31/gibberellin 3-oxidase-like protein [Ipomoea nil]
Unigene32137_Taxus	32	0	10.15	0.01	-9.98726	8.18454e-11	8.97277e-10	-	-	-	gi|217314615|gb|ACK36945.1|/1e-45/xyloglucan endotransglycosylase [Annona cherimola]
Unigene24897_Taxus	32	0	10.15	0.01	-9.98726	8.18454e-11	8.96726e-10	-	-	-	gi|4160402|emb|CAA10616.1|/6e-14/eukaryotic translation initiation factor 5 [Zea mays]
Unigene19103_Taxus	32	0	10.15	0.01	-9.98726	8.18454e-11	8.96174e-10	-	-	-	-
Unigene36483_Taxus	31	0	9.83	0.01	-9.94105	1.6896e-10	1.79168e-09	-	-	-	gi|115486181|ref|NP_001068234.1|/8e-77/Os11g0602800 [Oryza sativa (japonica cultivar-group)] >gi|113645456|dbj|BAF28597.1| Os11g0602800 [Oryza sativa Japonica Group]
Unigene21116_Taxus	31	0	9.83	0.01	-9.94105	1.6896e-10	1.79061e-09	-	-	-	gi|224057465|ref|XP_002299234.1|/0.0/heavy metal ATPase [Populus trichocarpa] >gi|222846492|gb|EEE84039.1| heavy metal ATPase [Populus trichocarpa]
Unigene9939_Taxus	31	0	9.83	0.01	-9.94105	1.6896e-10	1.78955e-09	-	-	-	gi|15724156|gb|AAL06470.1|AF411780_1/5e-06/AT4g37450/F6G17_100 [Arabidopsis thaliana] >gi|20334856|gb|AAM16184.1| AT4g37450/F6G17_100 [Arabidopsis thaliana]
Unigene17094_Taxus	31	0	9.83	0.01	-9.94105	1.6896e-10	1.78848e-09	-	-	-	-
Unigene24431_Taxus	31	0	9.83	0.01	-9.94105	1.6896e-10	1.78742e-09	GO:0016020//membrane	-	-	gi|15238125|ref|NP_198975.1|/2e-18/BTI3 (VIRB2-INTERACTING PROTEIN 3) [Arabidopsis thaliana] >gi|75170282|sp|Q9FFS0.1|RTNLD_ARATH RecName: Full=Reticulon-like protein B4; Short=AtRTNLB4; AltName: Full=VirB2-interacting protein 3 >gi|16323069|gb|AAL15269.1| AT5g41600/MBK23_13 [Arabidopsis thaliana]
Unigene35383_Taxus	31	0	9.83	0.01	-9.94105	1.6896e-10	1.78636e-09	-	-	-	gi|1617268|emb|CAA96523.1|/1e-108/acyl CoA synthetase [Brassica napus]
Unigene15902_Taxus	31	0	9.83	0.01	-9.94105	1.6896e-10	1.7853e-09	-	-	-	gi|255673908|dbj|BAF06852.2|/6e-26/Os01g0871500 [Oryza sativa Japonica Group]
Unigene8164_Taxus	30	0	9.51	0.01	-9.8933	3.48796e-10	3.57115e-09	-	-	-	gi|60202574|gb|AAX14674.1|/1e-10/gibberellin 2-oxidase 3 [Spinacia oleracea]
Unigene4398_Taxus	30	0	9.51	0.01	-9.8933	3.48796e-10	3.5691e-09	-	GO:0005515//protein binding	-	gi|193872614|gb|ACF23035.1|/5e-06/ST240 [Thellungiella halophila]
Unigene19737_Taxus	30	0	9.51	0.01	-9.8933	3.48796e-10	3.56705e-09	-	-	-	gi|110289556|gb|ABG66249.1|/1e-41/Matrixin family protein, expressed [Oryza sativa (japonica cultivar-group)]
Unigene6204_Taxus	7003	8	2220.7	2.38	-9.86584	0	0	-	-	-	-
Unigene21052_Taxus	29	0	9.2	0.01	-9.84549	7.20048e-10	7.15031e-09	-	-	-	gi|16119002|gb|AAL14699.1|/6e-25/2-oxoglutarate-dependent dioxygenase [Arabidopsis thaliana]
Unigene26240_Taxus	29	0	9.2	0.01	-9.84549	7.20048e-10	7.14633e-09	-	GO:0020037//heme binding;GO:0016688//L-ascorbate peroxidase activity	GO:0055114//oxidation reduction;GO:0006979//response to oxidative stress	gi|213492168|gb|ACB45429.3|/2e-37/ascorbate peroxidase [Camellia sinensis]
Unigene891_Taxus	28	0	8.88	0.01	-9.79442	1.48645e-09	1.4161e-08	GO:0016020//membrane	GO:0009055//electron carrier activity;GO:0020037//heme binding;GO:0050598	GO:0042617;GO:0055114//oxidation reduction	gi|75319883|sp|Q50EK0.1|C16B2_PICSI/2e-11/RecName: Full=Cytochrome P450 716B2; AltName: Full=Cytochrome P450 CYPA2 >gi|59800276|gb|AAX07437.1| cytochrome P450 CYPA2 [Picea sitchensis]
Unigene8451_Taxus	28	0	8.88	0.01	-9.79442	1.48645e-09	1.41535e-08	-	-	-	gi|8272626|gb|AAF74286.1|AF261774_1/7e-07/ORFX [Solanum lycopersicum] >gi|27413995|gb|AAO12185.1| fw2.2 [Solanum lycopersicum] >gi|27413997|gb|AAO12186.1| fw2.2 [Solanum lycopersicum] >gi|27413999|gb|AAO12187.1| fw2.2 [Solanum lycopersicum] >gi|27414001|gb|AAO12188.1| fw2.2 [Solanum lycopersicum]
Unigene14438_Taxus	28	0	8.88	0.01	-9.79442	1.48645e-09	1.41459e-08	-	-	-	gi|50659030|gb|AAT80328.1|/1e-164/UDP-D-glucuronate decarboxylase [Hordeum vulgare]
Unigene25451_Taxus	28	0	8.88	0.01	-9.79442	1.48645e-09	1.41383e-08	-	-	-	-
Unigene1487_Taxus	28	0	8.88	0.01	-9.79442	1.48645e-09	1.41308e-08	-	-	-	gi|113205363|gb|AAT66771.2|/8e-06/Putative polyprotein, identical [Solanum demissum]
Unigene18575_Taxus	27	0	8.56	0.01	-9.74147	3.0686e-09	2.81789e-08	-	-	-	gi|15219445|ref|NP_178085.1|/3e-50/RFO1 (RESISTANCE TO FUSARIUM OXYSPORUM 1); kinase [Arabidopsis thaliana] >gi|75247675|sp|Q8RY17.1|WAKLI_ARATH RecName: Full=Wall-associated receptor kinase-like 22; Flags: Precursor >gi|19310447|gb|AAL84959.1| At1g79670/F20B17_27 [Arabidopsis thaliana]
Unigene2396_Taxus	27	0	8.56	0.01	-9.74147	3.0686e-09	2.81644e-08	-	GO:0017111//nucleoside-triphosphatase activity	-	gi|168038530|ref|XP_001771753.1|/0.0/ATP-binding cassette transporter, subfamily C, member 8, group MRP protein PpABCC8 [Physcomitrella patens subsp. patens] >gi|162676884|gb|EDQ63361.1| ATP-binding cassette transporter, subfamily C, member 8, group MRP protein PpABCC8 [Physcomitrella patens subsp. patens]
Unigene28964_Taxus	27	0	8.56	0.01	-9.74147	3.0686e-09	2.81499e-08	-	-	-	gi|158822005|gb|ABW80964.1|/1e-15/alpha pinene synthase [Chamaecyparis formosensis]
Unigene22982_Taxus	27	0	8.56	0.01	-9.74147	3.0686e-09	2.81354e-08	-	-	-	-
Unigene3357_Taxus	27	0	8.56	0.01	-9.74147	3.0686e-09	2.81209e-08	-	-	-	gi|224105365|ref|XP_002313786.1|/6e-06/phenylcoumaran benzylic ether reductase 2 [Populus trichocarpa] >gi|222850194|gb|EEE87741.1| phenylcoumaran benzylic ether reductase 2 [Populus trichocarpa]
Unigene16186_Taxus	27	0	8.56	0.01	-9.74147	3.0686e-09	2.81065e-08	-	-	-	gi|115439785|ref|NP_001044172.1|/3e-64/Os01g0736100 [Oryza sativa (japonica cultivar-group)] >gi|113533703|dbj|BAF06086.1| Os01g0736100 [Oryza sativa Japonica Group]
Unigene5777_Taxus	26	0	8.24	0.01	-9.6865	6.33474e-09	5.59511e-08	-	-	-	gi|158954519|gb|ABW84236.1|/1e-134/10-deacetylbaccatin III-10-O-acetyl transferase [Taxus wallichiana var. chinensis]
Unigene2159_Taxus	26	0	8.24	0.01	-9.6865	6.33474e-09	5.59234e-08	-	-	-	-
Unigene4264_Taxus	26	0	8.24	0.01	-9.6865	6.33474e-09	5.58957e-08	-	-	-	-
Unigene16350_Taxus	26	0	8.24	0.01	-9.6865	6.33474e-09	5.5868e-08	-	-	-	gi|27452902|gb|AAO15286.1|/1e-108/Putative mandelonitrile lyase [Oryza sativa Japonica Group] >gi|108705877|gb|ABF93672.1| GMC oxidoreductase family protein [Oryza sativa (japonica cultivar-group)] >gi|255674163|dbj|BAH91968.1| Os03g0118700 [Oryza sativa Japonica Group]
Unigene31841_Taxus	26	0	8.24	0.01	-9.6865	6.33474e-09	5.58404e-08	-	-	-	gi|159472172|ref|XP_001694225.1|/3e-26/ribosomal protein S25, component of cytosolic 80S ribosome and 40S small subunit [Chlamydomonas reinhardtii] >gi|158276888|gb|EDP02658.1| ribosomal protein S25 [Chlamydomonas reinhardtii]
Unigene31875_Taxus	25	0	7.93	0.01	-9.63118	1.30773e-08	1.11363e-07	-	-	-	gi|115479489|ref|NP_001063338.1|/3e-16/Os09g0452800 [Oryza sativa (japonica cultivar-group)] >gi|113631571|dbj|BAF25252.1| Os09g0452800 [Oryza sativa Japonica Group]
Unigene3083_Taxus	25	0	7.93	0.01	-9.63118	1.30773e-08	1.1131e-07	-	-	-	gi|115445865|ref|NP_001046712.1|/7e-06/Os02g0327700 [Oryza sativa (japonica cultivar-group)] >gi|113536243|dbj|BAF08626.1| Os02g0327700 [Oryza sativa Japonica Group]
Unigene25197_Taxus	25	0	7.93	0.01	-9.63118	1.30773e-08	1.11257e-07	-	-	-	-
Unigene18075_Taxus	25	0	7.93	0.01	-9.63118	1.30773e-08	1.11204e-07	-	-	-	gi|14326547|gb|AAK60318.1|AF385727_1/3e-48/AT3g03980/T11I18_9 [Arabidopsis thaliana] >gi|23505923|gb|AAN28821.1| At3g03980/T11I18_9 [Arabidopsis thaliana]
Unigene12072_Taxus	25	0	7.93	0.01	-9.63118	1.30773e-08	1.11151e-07	GO:0005886//plasma membrane	GO:0042936//dipeptide transporter activity	GO:0009860//pollen tube growth;GO:0042938//dipeptide transport	gi|30696666|ref|NP_176411.2|/6e-08/proton-dependent oligopeptide transport (POT) family protein [Arabidopsis thaliana] >gi|16604436|gb|AAL24224.1| At1g62200/F19K23_13 [Arabidopsis thaliana]
Unigene18383_Taxus	25	0	7.93	0.01	-9.63118	1.30773e-08	1.11098e-07	-	-	-	gi|115467154|ref|NP_001057176.1|/1e-07/Os06g0221200 [Oryza sativa (japonica cultivar-group)] >gi|113595216|dbj|BAF19090.1| Os06g0221200 [Oryza sativa Japonica Group] >gi|254209525|gb|ACT64891.1| annexin p33 [Oryza sativa Indica Group]
Unigene1803_Taxus	25	0	7.93	0.01	-9.63118	1.30773e-08	1.11045e-07	-	-	-	-
Unigene10494_Taxus	24	0	7.61	0.01	-9.57175	2.69964e-08	2.2001e-07	-	-	-	gi|224284251|gb|ACN39861.1|/3e-11/unknown [Picea sitchensis]
Unigene2167_Taxus	24	0	7.61	0.01	-9.57175	2.69964e-08	2.19909e-07	-	-	-	-
Unigene2749_Taxus	24	0	7.61	0.01	-9.57175	2.69964e-08	2.19808e-07	-	-	-	-
Unigene16351_Taxus	23	0	7.29	0.01	-9.50978	5.57308e-08	4.38535e-07	-	-	-	gi|68479932|ref|XP_716016.1|/2e-18/potential oxidoreductase [Candida albicans SC5314] >gi|68480064|ref|XP_715958.1| potential oxidoreductase [Candida albicans SC5314] >gi|46437605|gb|EAK96948.1| potential oxidoreductase [Candida albicans SC5314] >gi|46437665|gb|EAK97007.1| potential oxidoreductase [Candida albicans SC5314]
Unigene28171_Taxus	23	0	7.29	0.01	-9.50978	5.57308e-08	4.38342e-07	-	-	-	gi|58267198|ref|XP_570755.1|/8e-06/cop9 signalosome complex subunit 1 [Cryptococcus neoformans var. neoformans JEC21]
Unigene28768_Taxus	23	0	7.29	0.01	-9.50978	5.57308e-08	4.38148e-07	-	-	-	gi|26397870|sp|Q9LXG3.1|PER56_ARATH/2e-28/RecName: Full=Peroxidase 56; Short=Atperox P56; AltName: Full=ATP33; Flags: Precursor >gi|7671487|emb|CAB89328.1| prx10 peroxidase-like protein [Arabidopsis thaliana] >gi|110736795|dbj|BAF00358.1| prx10 peroxidase - like protein [Arabidopsis thaliana]
Unigene32738_Taxus	23	0	7.29	0.01	-9.50978	5.57308e-08	4.37955e-07	-	-	-	gi|3023196|sp|Q96452.1|1433C_SOYBN/4e-49/RecName: Full=14-3-3-like protein C; AltName: Full=SGF14C >gi|1575729|gb|AAB09582.1| SGF14C [Glycine max]
Unigene2274_Taxus	23	0	7.29	0.01	-9.50978	5.57308e-08	4.37762e-07	-	-	-	gi|7715607|gb|AAF68125.1|AC010793_20/2e-71/F20B17.6 [Arabidopsis thaliana]
Unigene32991_Taxus	23	0	7.29	0.01	-9.50978	5.57308e-08	4.37569e-07	-	-	-	gi|226510337|ref|NP_001147125.1|/5e-60/ATP-binding cassette sub-family G member 2 [Zea mays] >gi|195607474|gb|ACG25567.1| ATP-binding cassette sub-family G member 2 [Zea mays]
Unigene4403_Taxus	23	0	7.29	0.01	-9.50978	5.57308e-08	4.37376e-07	-	-	-	-
Unigene3271_Taxus	22	0	6.98	0.01	-9.44708	1.15049e-07	8.65543e-07	-	-	-	-
Unigene2370_Taxus	22	0	6.98	0.01	-9.44708	1.15049e-07	8.65177e-07	-	-	-	gi|186512726|ref|NP_194065.3|/1e-06/oxidoreductase, 2OG-Fe(II) oxygenase family protein [Arabidopsis thaliana]
Unigene5546_Taxus	22	0	6.98	0.01	-9.44708	1.15049e-07	8.64812e-07	-	-	-	gi|34365635|gb|AAQ65129.1|/1e-29/At3g49550 [Arabidopsis thaliana]
Unigene33644_Taxus	22	0	6.98	0.01	-9.44708	1.15049e-07	8.64448e-07	-	-	-	gi|156055590|ref|XP_001593719.1|/1e-25/ubiquitin-conjugating enzyme E2 [Sclerotinia sclerotiorum 1980] >gi|154702931|gb|EDO02670.1| ubiquitin-conjugating enzyme E2 [Sclerotinia sclerotiorum 1980]
Unigene27476_Taxus	22	0	6.98	0.01	-9.44708	1.15049e-07	8.64083e-07	-	-	-	gi|190896338|gb|ACE96682.1|/1e-32/cinnamyl alcohol dehydrogenase [Populus tremula] >gi|190896340|gb|ACE96683.1| cinnamyl alcohol dehydrogenase [Populus tremula] >gi|190896342|gb|ACE96684.1| cinnamyl alcohol dehydrogenase [Populus tremula] >gi|190896344|gb|ACE96685.1| cinnamyl alcohol dehydrogenase [Populus tremula] >gi|190896346|gb|ACE96686.1| cinnamyl alcohol dehydrogenase [Populus tremula] >gi|…
Unigene10667_Taxus	22	0	6.98	0.01	-9.44708	1.15049e-07	8.63719e-07	-	-	-	gi|227121302|gb|ACP19341.1|/1e-44/phosphate transporter [Glycine max]
Unigene33948_Taxus	22	0	6.98	0.01	-9.44708	1.15049e-07	8.63355e-07	-	-	-	gi|284073176|gb|ADB77826.1|/2e-59/flavonoid 3'-hydroxylase allele 2 [Dahlia variabilis]
Unigene1905_Taxus	22	0	6.98	0.01	-9.44708	1.15049e-07	8.62992e-07	-	-	-	gi|15219439|ref|NP_175097.1|/5e-10/universal stress protein (USP) family protein [Arabidopsis thaliana]
Unigene5157_Taxus	22	0	6.98	0.01	-9.44708	1.15049e-07	8.62628e-07	-	-	-	gi|15237711|ref|NP_200668.1|/7e-59/PMR5 (POWDERY MILDEW RESISTANT 5) [Arabidopsis thaliana]
Unigene29366_Taxus	21	0	6.66	0.01	-9.37938	2.37506e-07	1.69179e-06	-	-	-	-
Unigene34682_Taxus	21	0	6.66	0.01	-9.37938	2.37506e-07	1.69111e-06	-	-	-	gi|115460502|ref|NP_001053851.1|/4e-59/Os04g0613000 [Oryza sativa (japonica cultivar-group)] >gi|32492894|gb|AAP85537.1| zinc transporter ZIP3 [Oryza sativa Japonica Group] >gi|38347354|emb|CAE05208.2| OSJNBa0070C17.15 [Oryza sativa (japonica cultivar-group)] >gi|113565422|dbj|BAF15765.1| Os04g0613000 [Oryza sativa Japonica Group]
Unigene33291_Taxus	21	0	6.66	0.01	-9.37938	2.37506e-07	1.69044e-06	GO:0016023//cytoplasmic membrane-bounded vesicle	-	-	gi|255676550|dbj|BAF18158.2|/6e-51/Os05g0550800 [Oryza sativa Japonica Group]
Unigene34215_Taxus	21	0	6.66	0.01	-9.37938	2.37506e-07	1.68976e-06	-	-	-	gi|195628630|gb|ACG36145.1|/1e-44/elongation factor 1-gamma 3 [Zea mays]
Unigene21308_Taxus	21	0	6.66	0.01	-9.37938	2.37506e-07	1.68909e-06	-	-	-	gi|15220485|ref|NP_176929.1|/1e-07/F-box family protein [Arabidopsis thaliana] >gi|75263152|sp|Q9FXC7.1|FB79_ARATH RecName: Full=Putative F-box protein At1g67623 >gi|11072021|gb|AAG28900.1|AC008113_16 F12A21.25 [Arabidopsis thaliana]
Unigene4935_Taxus	21	0	6.66	0.01	-9.37938	2.37506e-07	1.68842e-06	-	-	-	gi|21655189|gb|AAM28909.1|/5e-06/NBS/LRR [Pinus taeda]
Unigene35828_Taxus	21	0	6.66	0.01	-9.37938	2.37506e-07	1.68774e-06	-	-	-	gi|115463283|ref|NP_001055241.1|/5e-28/Os05g0339000 [Oryza sativa (japonica cultivar-group)]
Unigene36053_Taxus	20	0	6.34	0.01	-9.30834	4.903e-07	3.33895e-06	-	-	-	gi|15226259|ref|NP_180350.1|/1e-58/PD1 (PREPHENATE DEHYDRATASE 1); arogenate dehydratase/ prephenate dehydratase [Arabidopsis thaliana] >gi|75216871|sp|Q9ZUY3.1|AROD3_ARATH RecName: Full=Arogenate dehydratase 3, chloroplastic; Short=AtADT3; AltName: Full=Prephenate dehydratase 1; Short=AtPDT1; Flags: Precursor >gi|89340199|gb|ABD67750.1| arogenate dehydratase isoform 1 [Arabidopsis thaliana] >gi|…
Unigene31467_Taxus	20	0	6.34	0.01	-9.30834	4.903e-07	3.33767e-06	-	-	-	gi|143359821|sp|A2QIL2.1|PRP28_ASPNC/8e-06/RecName: Full=Pre-mRNA-splicing ATP-dependent RNA helicase prp28
Unigene26945_Taxus	20	0	6.34	0.01	-9.30834	4.903e-07	3.3364e-06	-	-	-	gi|86769479|gb|ABD15175.1|/4e-13/allene oxide synthase 2 [Solanum tuberosum]
Unigene20675_Taxus	20	0	6.34	0.01	-9.30834	4.903e-07	3.33513e-06	-	-	-	gi|157849678|gb|ABV89622.1|/1e-45/U-box domain-containing protein [Brassica rapa]
Unigene9898_Taxus	20	0	6.34	0.01	-9.30834	4.903e-07	3.33385e-06	-	-	-	-
Unigene5766_Taxus	20	0	6.34	0.01	-9.30834	4.903e-07	3.33258e-06	-	-	-	-
Unigene9395_Taxus	20	0	6.34	0.01	-9.30834	4.903e-07	3.33131e-06	-	-	-	gi|108707106|gb|ABF94901.1|/1e-06/Senescence-associated protein, expressed [Oryza sativa (japonica cultivar-group)]
Unigene15586_Taxus	20	0	6.34	0.01	-9.30834	4.903e-07	3.33004e-06	-	-	-	gi|224053501|ref|XP_002297845.1|/3e-06/f-box family protein [Populus trichocarpa] >gi|222845103|gb|EEE82650.1| f-box family protein [Populus trichocarpa]
Unigene15804_Taxus	20	0	6.34	0.01	-9.30834	4.903e-07	3.32877e-06	-	-	-	gi|60459369|gb|AAX20030.1|/4e-06/bZIP transcription factor protein [Capsicum annuum]
Unigene18072_Taxus	20	0	6.34	0.01	-9.30834	4.903e-07	3.3275e-06	-	-	-	gi|42573630|ref|NP_974911.1|/5e-17/thioesterase family protein [Arabidopsis thaliana]
Unigene18925_Taxus	20	0	6.34	0.01	-9.30834	4.903e-07	3.32624e-06	-	-	-	gi|115476916|ref|NP_001062054.1|/1e-49/Os08g0479300 [Oryza sativa (japonica cultivar-group)] >gi|147636834|sp|Q4KYM5.2|CCD42_ORYSJ RecName: Full=Cyclin-D4-2; AltName: Full=G1/S-specific cyclin-D4-2; Short=CycD4;2 >gi|113624023|dbj|BAF23968.1| Os08g0479300 [Oryza sativa Japonica Group]
Unigene16850_Taxus	19	0	6.03	0.01	-9.23601	1.01216e-06	6.54033e-06	-	-	-	gi|253825557|gb|ACT36293.1|/3e-06/dioscorin precursor [Dioscorea japonica]
Unigene15003_Taxus	19	0	6.03	0.01	-9.23601	1.01216e-06	6.53796e-06	-	-	-	-
Unigene9127_Taxus	19	0	6.03	0.01	-9.23601	1.01216e-06	6.53559e-06	-	-	-	gi|15222734|ref|NP_173978.1|/6e-19/BGLU40 (BETA GLUCOSIDASE 40); catalytic/ cation binding / hydrolase, hydrolyzing O-glycosyl compounds [Arabidopsis thaliana] >gi|75309954|sp|Q9FZE0.1|BGL40_ARATH RecName: Full=Beta-glucosidase 40; Short=AtBGLU40; Flags: Precursor >gi|9797746|gb|AAF98564.1|AC013427_7 Strong similarity to beta-glucosidase (BGQ60) from Hordeum vulgare gb|L41869 and is a member of t…
Unigene14297_Taxus	19	0	6.03	0.01	-9.23601	1.01216e-06	6.53323e-06	-	-	-	-
Unigene15033_Taxus	19	0	6.03	0.01	-9.23601	1.01216e-06	6.53086e-06	-	-	-	gi|225346677|gb|ACN86360.1|/2e-20/GID1-5 [Gossypium hirsutum]
Unigene34162_Taxus	19	0	6.03	0.01	-9.23601	1.01216e-06	6.52849e-06	-	-	-	gi|75279027|sp|O82012.1|HSP12_SOLPE/3e-39/RecName: Full=17.6 kDa class I heat shock protein; AltName: Full=Hsp20.0 >gi|3336892|emb|CAA12389.1| Hsp20.0 protein [Solanum peruvianum]
Unigene2991_Taxus	19	0	6.03	0.01	-9.23601	1.01216e-06	6.52613e-06	-	-	-	-
Unigene1776_Taxus	19	0	6.03	0.01	-9.23601	1.01216e-06	6.52377e-06	-	-	-	gi|438245|emb|CAA80502.1|/3e-60/peroxidase [Spirodela polyrrhiza]
Unigene35748_Taxus	19	0	6.03	0.01	-9.23601	1.01216e-06	6.52141e-06	-	-	-	gi|195608612|gb|ACG26136.1|/8e-87/PHD finger protein [Zea mays]
Unigene34894_Taxus	19	0	6.03	0.01	-9.23601	1.01216e-06	6.51905e-06	-	-	-	gi|225555420|gb|EEH03712.1|/1e-24/ATP-dependent permease MDL1 [Ajellomyces capsulatus G186AR]
Unigene1954_Taxus	19	0	6.03	0.01	-9.23601	1.01216e-06	6.5167e-06	-	-	-	gi|6573760|gb|AAF17680.1|AC009243_7/6e-06/F28K19.11 [Arabidopsis thaliana]
Unigene32539_Taxus	18	0	5.71	0.01	-9.15735	2.08948e-06	1.27045e-05	-	-	-	gi|226463406|gb|EEH60684.1|/2e-26/glycosyltransferase family 13 protein [Micromonas pusilla CCMP1545]
Unigene1564_Taxus	18	0	5.71	0.01	-9.15735	2.08948e-06	1.27001e-05	-	-	-	-
Unigene25608_Taxus	18	0	5.71	0.01	-9.15735	2.08948e-06	1.26958e-05	-	-	-	-
Unigene20227_Taxus	18	0	5.71	0.01	-9.15735	2.08948e-06	1.26915e-05	GO:0016020//membrane	-	-	gi|15238125|ref|NP_198975.1|/6e-14/BTI3 (VIRB2-INTERACTING PROTEIN 3) [Arabidopsis thaliana] >gi|75170282|sp|Q9FFS0.1|RTNLD_ARATH RecName: Full=Reticulon-like protein B4; Short=AtRTNLB4; AltName: Full=VirB2-interacting protein 3 >gi|16323069|gb|AAL15269.1| AT5g41600/MBK23_13 [Arabidopsis thaliana]
Unigene8115_Taxus	18	0	5.71	0.01	-9.15735	2.08948e-06	1.26871e-05	-	-	-	gi|15239304|ref|NP_198460.1|/1e-12/CYP716A1; electron carrier/ heme binding / iron ion binding / monooxygenase/ oxygen binding [Arabidopsis thaliana] >gi|8777295|dbj|BAA96885.1| cytochrome P450-like [Arabidopsis thaliana]
Unigene25060_Taxus	18	0	5.71	0.01	-9.15735	2.08948e-06	1.26828e-05	-	-	-	gi|224063401|ref|XP_002301128.1|/3e-40/tubulin alpha-1 chain [Populus trichocarpa] >gi|29124983|gb|AAO63781.1| alpha-tubulin 1 [Populus tremuloides] >gi|222842854|gb|EEE80401.1| tubulin alpha-1 chain [Populus trichocarpa]
Unigene25801_Taxus	18	0	5.71	0.01	-9.15735	2.08948e-06	1.26785e-05	-	-	-	gi|159470541|ref|XP_001693415.1|/2e-11/eukaryotic initiation factor [Chlamydomonas reinhardtii] >gi|158282918|gb|EDP08669.1| eukaryotic initiation factor [Chlamydomonas reinhardtii]
Unigene29587_Taxus	18	0	5.71	0.01	-9.15735	2.08948e-06	1.26742e-05	-	-	-	gi|18397342|ref|NP_564346.1|/2e-06/SGS domain-containing protein [Arabidopsis thaliana]
Unigene4992_Taxus	18	0	5.71	0.01	-9.15735	2.08948e-06	1.26699e-05	-	-	-	-
Unigene8778_Taxus	18	0	5.71	0.01	-9.15735	2.08948e-06	1.26656e-05	-	-	-	gi|77553314|gb|ABA96110.1|/2e-10/Major intrinsic protein, expressed [Oryza sativa (japonica cultivar-group)]
Unigene20714_Taxus	18	0	5.71	0.01	-9.15735	2.08948e-06	1.26613e-05	-	-	-	gi|29027854|dbj|BAC65970.1|/3e-07/lipase (class 3)-like protein [Oryza sativa Japonica Group]
Unigene33282_Taxus	18	0	5.71	0.01	-9.15735	2.08948e-06	1.26569e-05	-	-	-	gi|124359488|gb|ABN05926.1|/3e-13/RNA-binding region RNP-1 (RNA recognition motif) [Medicago truncatula]
Unigene2213_Taxus	18	0	5.71	0.01	-9.15735	2.08948e-06	1.26526e-05	GO:0016020//membrane	-	-	gi|115470147|ref|NP_001058672.1|/1e-19/Os07g0100600 [Oryza sativa (japonica cultivar-group)] >gi|113610208|dbj|BAF20586.1| Os07g0100600 [Oryza sativa Japonica Group]
Unigene34291_Taxus	18	0	5.71	0.01	-9.15735	2.08948e-06	1.26483e-05	-	-	-	gi|25446695|gb|AAN74842.1|/2e-30/Unknown protein [Oryza sativa Japonica Group]
Unigene7462_Taxus	18	0	5.71	0.01	-9.15735	2.08948e-06	1.26441e-05	-	-	-	gi|148733635|gb|ABR09296.1|/2e-08/ethphon-induced protein [Hevea brasiliensis] >gi|212960212|gb|ACJ38661.1| ethphon-induced protein [Hevea brasiliensis]
Unigene22618_Taxus	18	0	5.71	0.01	-9.15735	2.08948e-06	1.26398e-05	-	-	-	gi|194466207|gb|ACF74334.1|/3e-07/lactoylglutathione lyase [Arachis hypogaea]
Unigene4778_Taxus	18	0	5.71	0.01	-9.15735	2.08948e-06	1.26355e-05	-	-	-	-
Unigene13843_Taxus	18	0	5.71	0.01	-9.15735	2.08948e-06	1.26312e-05	GO:0005739//mitochondrion;GO:0016020//membrane	-	-	gi|68482049|ref|XP_715042.1|/1e-175/potential sterol homeostasis protein [Candida albicans SC5314] >gi|46436645|gb|EAK96004.1| potential sterol homeostasis protein [Candida albicans SC5314]
Unigene23607_Taxus	18	0	5.71	0.01	-9.15735	2.08948e-06	1.26269e-05	-	GO:0004332//fructose-bisphosphate aldolase activity;GO:0005515//protein binding	GO:0006096//glycolysis	gi|281485510|dbj|BAI59774.1|/3e-28/aldolase C-1 [Phyllostachys edulis]
Unigene18751_Taxus	18	0	5.71	0.01	-9.15735	2.08948e-06	1.26226e-05	-	-	-	gi|224104023|ref|XP_002313286.1|/1e-30/cytochrome P450 [Populus trichocarpa] >gi|222849694|gb|EEE87241.1| cytochrome P450 [Populus trichocarpa]
Unigene31692_Taxus	18	0	5.71	0.01	-9.15735	2.08948e-06	1.26183e-05	-	-	-	-
Unigene29285_Taxus	18	0	5.71	0.01	-9.15735	2.08948e-06	1.26141e-05	-	-	-	-
Unigene25540_Taxus	18	0	5.71	0.01	-9.15735	2.08948e-06	1.26098e-05	-	-	-	-
Unigene27079_Taxus	18	0	5.71	0.01	-9.15735	2.08948e-06	1.26055e-05	-	-	-	gi|156633954|gb|ABU90976.1|/3e-32/ribosomal protein L9 [Sonneratia caseolaris] >gi|156633956|gb|ABU90977.1| ribosomal protein L9 [Sonneratia caseolaris] >gi|156633958|gb|ABU90978.1| ribosomal protein L9 [Sonneratia caseolaris] >gi|156633960|gb|ABU90979.1| ribosomal protein L9 [Sonneratia caseolaris] >gi|156633962|gb|ABU90980.1| ribosomal protein L9 [Sonneratia caseolaris] >gi|156633964|gb|ABU9098…
Unigene26283_Taxus	17	0	5.39	0.01	-9.07414	4.3135e-06	2.47011e-05	GO:0022627//cytosolic small ribosomal subunit	GO:0003735//structural constituent of ribosome;GO:0019843//rRNA binding	GO:0006412//translation	gi|1710780|sp|P52810.1|RS9_PODAN/3e-33/RecName: Full=40S ribosomal protein S9; AltName: Full=S7 >gi|1321917|emb|CAA65433.1| cytoplasmic ribosomal protein S7 [Podospora anserina]
Unigene28931_Taxus	17	0	5.39	0.01	-9.07414	4.3135e-06	2.46931e-05	-	-	-	gi|18408447|ref|NP_564866.1|/8e-06/U-box domain-containing protein [Arabidopsis thaliana] >gi|75169496|sp|Q9C8D1.1|PUB20_ARATH RecName: Full=U-box domain-containing protein 20; AltName: Full=Plant U-box protein 20
Unigene18723_Taxus	17	0	5.39	0.01	-9.07414	4.3135e-06	2.46852e-05	-	-	-	gi|156138775|dbj|BAF75879.1|/1e-50/glucosyltransferase [Dianthus caryophyllus]
Unigene31254_Taxus	17	0	5.39	0.01	-9.07414	4.3135e-06	2.46773e-05	-	-	-	gi|213407976|ref|XP_002174759.1|/4e-06/thymocyte nuclear protein [Schizosaccharomyces japonicus yFS275] >gi|212002806|gb|EEB08466.1| thymocyte nuclear protein [Schizosaccharomyces japonicus yFS275]
Unigene13549_Taxus	17	0	5.39	0.01	-9.07414	4.3135e-06	2.46693e-05	-	-	-	gi|253825549|gb|ACT36289.1|/2e-41/dioscorin precursor [Dioscorea japonica]
Unigene28836_Taxus	17	0	5.39	0.01	-9.07414	4.3135e-06	2.46614e-05	-	-	-	-
Unigene32900_Taxus	17	0	5.39	0.01	-9.07414	4.3135e-06	2.46535e-05	-	-	-	gi|33286372|gb|AAQ01668.1|/2e-28/(R,S)-reticuline 7-O-methyltransferase [Papaver somniferum]
Unigene26077_Taxus	17	0	5.39	0.01	-9.07414	4.3135e-06	2.46456e-05	GO:0016023//cytoplasmic membrane-bounded vesicle	-	-	gi|223452452|gb|ACM89553.1|/5e-13/Avr9/Cf-9 induced kinase [Glycine max]
Unigene26242_Taxus	17	0	5.39	0.01	-9.07414	4.3135e-06	2.46377e-05	-	-	-	gi|115454651|ref|NP_001050926.1|/3e-07/Os03g0685500 [Oryza sativa (japonica cultivar-group)] >gi|108710458|gb|ABF98253.1| CHCH domain containing protein, expressed [Oryza sativa (japonica cultivar-group)] >gi|113549397|dbj|BAF12840.1| Os03g0685500 [Oryza sativa Japonica Group]
Unigene6409_Taxus	17	0	5.39	0.01	-9.07414	4.3135e-06	2.46298e-05	-	-	-	-
Unigene14097_Taxus	17	0	5.39	0.01	-9.07414	4.3135e-06	2.46219e-05	-	-	-	gi|225560494|gb|EEH08775.1|/3e-72/dihydroceramide delta(4)-desaturase [Ajellomyces capsulatus G186AR]
Unigene20373_Taxus	17	0	5.39	0.01	-9.07414	4.3135e-06	2.4614e-05	-	-	-	gi|42562273|ref|NP_173768.2|/3e-60/protein kinase family protein [Arabidopsis thaliana]
Unigene27633_Taxus	17	0	5.39	0.01	-9.07414	4.3135e-06	2.46061e-05	-	-	-	gi|256355113|ref|NP_001157807.1|/8e-41/aminoaldehyde dehydrogenase 1 [Zea mays] >gi|241995293|gb|ACS74867.1| aminoaldehyde dehydrogenase 1 [Zea mays]
Unigene1251_Taxus	17	0	5.39	0.01	-9.07414	4.3135e-06	2.45983e-05	-	-	-	gi|259148995|emb|CAY82239.1|/7e-06/Aga1p [Saccharomyces cerevisiae EC1118]
Unigene33105_Taxus	16	0	5.07	0.01	-8.98584	8.90466e-06	4.8483e-05	GO:0016020//membrane	-	-	gi|255949308|ref|XP_002565421.1|/2e-21/Pc22g15030 [Penicillium chrysogenum Wisconsin 54-1255] >gi|211592438|emb|CAP98791.1| Pc22g15030 [Penicillium chrysogenum Wisconsin 54-1255]
Unigene17504_Taxus	16	0	5.07	0.01	-8.98584	8.90466e-06	4.84682e-05	-	-	-	gi|157101216|dbj|BAF79939.1|/1e-107/receptor-like kinase [Marchantia polymorpha]
Unigene25664_Taxus	16	0	5.07	0.01	-8.98584	8.90466e-06	4.84534e-05	-	-	-	gi|15232671|ref|NP_188194.1|/4e-40/PLDALPHA1 (PHOSPHOLIPASE D ALPHA 1); phospholipase D [Arabidopsis thaliana] >gi|13124800|sp|Q38882.2|PLDA1_ARATH RecName: Full=Phospholipase D alpha 1; Short=PLD alpha 1; Short=AtPLDalpha1; AltName: Full=Choline phosphatase 1; AltName: Full=Phosphatidylcholine-hydrolyzing phospholipase D 1; AltName: Full=PLDalpha >gi|11994345|dbj|BAB02304.1| phospholipase D [Ara…
Unigene7419_Taxus	16	0	5.07	0.01	-8.98584	8.90466e-06	4.84386e-05	-	-	-	gi|162459692|ref|NP_001105573.1|/1e-15/small auxin up RNA1 [Zea mays]
Unigene16157_Taxus	16	0	5.07	0.01	-8.98584	8.90466e-06	4.84238e-05	-	-	-	gi|5531318|emb|CAB50901.1|/2e-29/TRE1 protein [Medicago truncatula]
Unigene27910_Taxus	16	0	5.07	0.01	-8.98584	8.90466e-06	4.84091e-05	-	-	-	-
Unigene17466_Taxus	16	0	5.07	0.01	-8.98584	8.90466e-06	4.83943e-05	-	-	-	gi|76884939|gb|ABA59556.1|/5e-33/U-box protein [Capsicum annuum]
Unigene32891_Taxus	16	0	5.07	0.01	-8.98584	8.90466e-06	4.83795e-05	-	-	-	gi|116056067|emb|CAL58600.1|/2e-14/acyl carrier protein 1 (ISS) [Ostreococcus tauri]
Unigene34505_Taxus	16	0	5.07	0.01	-8.98584	8.90466e-06	4.83648e-05	-	-	-	gi|8928412|sp|Q40106.1|TBB2_LUPAL/1e-138/RecName: Full=Tubulin beta-2 chain; AltName: Full=Beta-2-tubulin >gi|1399450|gb|AAB03267.1| beta-tubulin 2 [Lupinus albus]
Unigene13330_Taxus	16	0	5.07	0.01	-8.98584	8.90466e-06	4.83501e-05	-	-	-	gi|224115704|ref|XP_002317101.1|/1e-71/cytochrome P450 [Populus trichocarpa] >gi|222860166|gb|EEE97713.1| cytochrome P450 [Populus trichocarpa]
Unigene10424_Taxus	16	0	5.07	0.01	-8.98584	8.90466e-06	4.83353e-05	-	-	-	gi|106880170|emb|CAJ80767.1|/6e-22/red chlorophyll catabolite reductase [Brassica napus]
Unigene2806_Taxus	16	0	5.07	0.01	-8.98584	8.90466e-06	4.83206e-05	-	-	-	gi|162460417|ref|NP_001104954.1|/5e-60/cellulose synthase-1 [Zea mays] >gi|9622874|gb|AAF89961.1|AF200525_1 cellulose synthase-1 [Zea mays]
Unigene29270_Taxus	16	0	5.07	0.01	-8.98584	8.90466e-06	4.83059e-05	-	-	-	gi|2801433|gb|AAB97312.1|/3e-34/salt stress inducible small GTP binding protein Ran1 homolog [Arabidopsis thaliana]
Unigene6309_Taxus	16	0	5.07	0.01	-8.98584	8.90466e-06	4.82912e-05	-	-	-	gi|254583001|ref|XP_002499232.1|/1e-19/ZYRO0E07106p [Zygosaccharomyces rouxii] >gi|238942806|emb|CAR30977.1| ZYRO0E07106p [Zygosaccharomyces rouxii]
Unigene33246_Taxus	16	0	5.07	0.01	-8.98584	8.90466e-06	4.82765e-05	-	-	-	gi|115479251|ref|NP_001063219.1|/3e-08/Os09g0425200 [Oryza sativa (japonica cultivar-group)] >gi|50725911|dbj|BAD33439.1| fibroin heavy chain precursor (Fib-H) (H-fibroin)-like protein [Oryza sativa Japonica Group] >gi|50726079|dbj|BAD33601.1| fibroin heavy chain precursor (Fib-H) (H-fibroin)-like protein [Oryza sativa Japonica Group] >gi|113631452|dbj|BAF25133.1| Os09g0425200 [Oryza sativa Japon…
Unigene1640_Taxus	16	0	5.07	0.01	-8.98584	8.90466e-06	4.82618e-05	-	-	-	gi|186499096|ref|NP_001118258.1|/2e-57/ATUPS3 (Arabidopsis thaliana ureide permease 3)
Unigene6595_Taxus	16	0	5.07	0.01	-8.98584	8.90466e-06	4.82471e-05	-	-	-	-
Unigene121_Taxus	16	0	5.07	0.01	-8.98584	8.90466e-06	4.82324e-05	-	-	-	-
Unigene5180_Taxus	16	0	5.07	0.01	-8.98584	8.90466e-06	4.82178e-05	-	GO:0046872//metal ion binding;GO:0016702//oxidoreductase activity, acting on single donors with incorporation of molecular oxygen, incorporation of two atoms of oxygen	GO:0006633//fatty acid biosynthetic process	gi|199612209|gb|ACH91370.1|/7e-79/lipoxygenase LOX-3 [Prunus persica]
Unigene14243_Taxus	16	0	5.07	0.01	-8.98584	8.90466e-06	4.82031e-05	-	-	-	gi|19115237|ref|NP_594325.1|/2e-82/phosphomannomutase Pmm1 [Schizosaccharomyces pombe] >gi|12585298|sp|Q9UTJ2.1|PMM_SCHPO RecName: Full=Phosphomannomutase; Short=PMM >gi|6448612|emb|CAB61218.1| phosphomannomutase Pmm1 [Schizosaccharomyces pombe]
Unigene34176_Taxus	16	0	5.07	0.01	-8.98584	8.90466e-06	4.81885e-05	-	-	-	gi|15232132|ref|NP_189366.1|/1e-104/G6PD5 (glucose-6-phosphate dehydrogenase 5); glucose-6-phosphate dehydrogenase [Arabidopsis thaliana] >gi|79313844|ref|NP_001030780.1| G6PD5 (glucose-6-phosphate dehydrogenase 5); glucose-6-phosphate dehydrogenase [Arabidopsis thaliana] >gi|145332697|ref|NP_001078214.1| G6PD5 (glucose-6-phosphate dehydrogenase 5); glucose-6-phosphate dehydrogenase [Arabidopsis …
Unigene28908_Taxus	16	0	5.07	0.01	-8.98584	8.90466e-06	4.81739e-05	-	-	-	gi|4836403|gb|AAD30426.1|AF117723_1/6e-06/seed maturation protein PM27 [Glycine max]
Unigene32995_Taxus	15	0	4.76	0.01	-8.89482	1.83826e-05	9.44036e-05	-	-	-	gi|68611229|emb|CAE03043.3|/2e-13/OSJNBa0084A10.18 [Oryza sativa (japonica cultivar-group)]
Unigene27992_Taxus	15	0	4.76	0.01	-8.89482	1.83826e-05	9.43764e-05	-	-	-	gi|224166302|ref|XP_002338914.1|/1e-12/AP2/ERF domain-containing transcription factor [Populus trichocarpa] >gi|222873926|gb|EEF11057.1| AP2/ERF domain-containing transcription factor [Populus trichocarpa]
Unigene31838_Taxus	15	0	4.76	0.01	-8.89482	1.83826e-05	9.43492e-05	-	-	-	gi|37960091|gb|AAP51070.1|/4e-17/glucose-6-phosphate isomerase [Phytophthora infestans]
Unigene12987_Taxus	15	0	4.76	0.01	-8.89482	1.83826e-05	9.4322e-05	-	-	-	gi|115440983|ref|NP_001044771.1|/5e-26/Os01g0842200 [Oryza sativa (japonica cultivar-group)] >gi|56784238|dbj|BAD81733.1| SCARECROW-like protein [Oryza sativa Japonica Group] >gi|113534302|dbj|BAF06685.1| Os01g0842200 [Oryza sativa Japonica Group]
Unigene9461_Taxus	15	0	4.76	0.01	-8.89482	1.83826e-05	9.42949e-05	-	-	-	gi|15225023|ref|NP_178968.1|/5e-06/C2 domain-containing protein [Arabidopsis thaliana] >gi|28950977|gb|AAO63412.1| At2g13350 [Arabidopsis thaliana]
Unigene5659_Taxus	15	0	4.76	0.01	-8.89482	1.83826e-05	9.42677e-05	-	-	-	gi|21842139|gb|AAM77718.1|AF465267_1/4e-69/cytochrome P450 monooxygenase CYP72A28 [Zea mays subsp. mays]
Unigene14381_Taxus	15	0	4.76	0.01	-8.89482	1.83826e-05	9.42406e-05	GO:0016020//membrane	-	-	gi|115436698|ref|NP_001043107.1|/2e-06/Os01g0389200 [Oryza sativa (japonica cultivar-group)] >gi|113532638|dbj|BAF05021.1| Os01g0389200 [Oryza sativa Japonica Group]
Unigene33570_Taxus	15	0	4.76	0.01	-8.89482	1.83826e-05	9.42135e-05	-	-	-	-
Unigene2973_Taxus	15	0	4.76	0.01	-8.89482	1.83826e-05	9.41864e-05	-	-	-	gi|255680352|dbj|BAF28791.2|/9e-06/Os11g0670100 [Oryza sativa Japonica Group]
Unigene19468_Taxus	15	0	4.76	0.01	-8.89482	1.83826e-05	9.41593e-05	-	-	-	gi|9758298|dbj|BAB08841.1|/5e-30/dihydroneopterin aldolase-like protein [Arabidopsis thaliana] >gi|48310587|gb|AAT41843.1| At5g62980 [Arabidopsis thaliana]
Unigene12848_Taxus	15	0	4.76	0.01	-8.89482	1.83826e-05	9.41322e-05	-	-	-	gi|72534122|emb|CAH17980.1|/6e-60/stigma specific peroxidase precursor [Senecio squalidus]
Unigene14150_Taxus	15	0	4.76	0.01	-8.89482	1.83826e-05	9.41052e-05	-	-	-	gi|218533930|gb|ACK87035.1|/1e-150/actin [Caragana korshinskii]
Unigene17434_Taxus	15	0	4.76	0.01	-8.89482	1.83826e-05	9.40781e-05	-	-	-	gi|226505656|ref|NP_001147859.1|/2e-57/BRASSINOSTEROID INSENSITIVE 1-associated receptor kinase 1 [Zea mays] >gi|195614176|gb|ACG28918.1| BRASSINOSTEROID INSENSITIVE 1-associated receptor kinase 1 precursor [Zea mays]
Unigene36249_Taxus	15	0	4.76	0.01	-8.89482	1.83826e-05	9.40511e-05	-	-	-	gi|270156568|gb|ACZ63205.1|/0.0/flavonoid 3',5'-hydroxylase [Vinca major]
Unigene4527_Taxus	15	0	4.76	0.01	-8.89482	1.83826e-05	9.40241e-05	-	-	-	gi|227206366|dbj|BAH57238.1|/1e-33/AT1G09700 [Arabidopsis thaliana]
Unigene6670_Taxus	15	0	4.76	0.01	-8.89482	1.83826e-05	9.39971e-05	-	-	-	gi|224115140|ref|XP_002332211.1|/3e-09/predicted protein [Populus trichocarpa] >gi|222874875|gb|EEF12006.1| predicted protein [Populus trichocarpa]
Unigene948_Taxus	15	0	4.76	0.01	-8.89482	1.83826e-05	9.39702e-05	GO:0016020//membrane	GO:0005515//protein binding	GO:0016192//vesicle-mediated transport;GO:0006886//intracellular protein transport	gi|78146241|gb|ABB22782.1|/5e-79/SNARE protein [Oryza sativa Japonica Group]
Unigene1127_Taxus	15	0	4.76	0.01	-8.89482	1.83826e-05	9.39432e-05	-	GO:0046872//metal ion binding	-	gi|225905689|gb|ACO35757.1|/3e-74/flavonoid 3'-hydroxylase [Rudbeckia hirta]
Unigene29596_Taxus	14	0	4.44	0.01	-8.79442	3.79486e-05	0.00018381	-	-	-	-
Unigene21922_Taxus	14	0	4.44	0.01	-8.79442	3.79486e-05	0.00018376	GO:0016021//integral to membrane	GO:0005215//transporter activity	GO:0006810//transport	gi|3158476|gb|AAC17529.1|/9e-24/aquaporin 2 [Samanea saman]
Unigene13097_Taxus	14	0	4.44	0.01	-8.79442	3.79486e-05	0.00018371	-	-	-	gi|224126123|ref|XP_002319761.1|/2e-33/flavonoid 3'-hydroxylase [Populus trichocarpa] >gi|222858137|gb|EEE95684.1| flavonoid 3'-hydroxylase [Populus trichocarpa]
Unigene3059_Taxus	14	0	4.44	0.01	-8.79442	3.79486e-05	0.000183661	-	-	-	gi|226281516|gb|EEH37082.1|/8e-46/xaa-Pro aminopeptidase [Paracoccidioides brasiliensis Pb01]
Unigene2485_Taxus	14	0	4.44	0.01	-8.79442	3.79486e-05	0.000183611	GO:0016023//cytoplasmic membrane-bounded vesicle	GO:0005507//copper ion binding;GO:0009055//electron carrier activity	GO:0022900//electron transport chain	gi|226505206|ref|NP_001152010.1|/5e-27/blue copper protein [Zea mays] >gi|195651823|gb|ACG45379.1| blue copper protein precursor [Zea mays]
Unigene35224_Taxus	14	0	4.44	0.01	-8.79442	3.79486e-05	0.000183561	-	-	-	gi|9758729|dbj|BAB09167.1|/9e-34/ATP-dependent Clp protease-like protein [Arabidopsis thaliana]
Unigene32413_Taxus	14	0	4.44	0.01	-8.79442	3.79486e-05	0.000183511	-	-	-	gi|6573778|gb|AAF17698.1|AC009243_25/8e-41/F28K19.15 [Arabidopsis thaliana]
Unigene24705_Taxus	14	0	4.44	0.01	-8.79442	3.79486e-05	0.000183461	-	-	-	gi|255086813|ref|XP_002509373.1|/6e-09/2-c-methyl-d-erythritol 2,4-cyclodiphosphate synthase [Micromonas sp. RCC299] >gi|226524651|gb|ACO70631.1| 2-c-methyl-d-erythritol 2,4-cyclodiphosphate synthase [Micromonas sp. RCC299]
Unigene243_Taxus	14	0	4.44	0.01	-8.79442	3.79486e-05	0.000183411	-	-	-	-
Unigene8329_Taxus	14	0	4.44	0.01	-8.79442	3.79486e-05	0.000183362	-	-	-	-
Unigene10581_Taxus	14	0	4.44	0.01	-8.79442	3.79486e-05	0.000183312	-	-	-	-
Unigene4731_Taxus	14	0	4.44	0.01	-8.79442	3.79486e-05	0.000183262	-	-	-	gi|223452280|gb|ACM89468.1|/1e-128/ATP-binding/protein serine/threonine kinase [Glycine max]
Unigene24170_Taxus	14	0	4.44	0.01	-8.79442	3.79486e-05	0.000183213	GO:0009501//amyloplast;GO:0009507//chloroplast	GO:0033840;GO:0009011//starch synthase activity	GO:0019252//starch biosynthetic process	gi|270312421|gb|ACZ73333.1|/1e-32/granule-bound starch synthase [Castilleja campestris]
Unigene14669_Taxus	14	0	4.44	0.01	-8.79442	3.79486e-05	0.000183163	-	-	-	gi|168011953|ref|XP_001758667.1|/4e-12/GLP4 GID1-like protein [Physcomitrella patens subsp. patens] >gi|162690277|gb|EDQ76645.1| GLP4 GID1-like protein [Physcomitrella patens subsp. patens]
Unigene19308_Taxus	14	0	4.44	0.01	-8.79442	3.79486e-05	0.000183113	-	-	-	gi|44894747|gb|AAS48868.1|/5e-88/voltage-dependent anion-selective channel [Brassica rapa subsp. pekinensis]
Unigene6482_Taxus	14	0	4.44	0.01	-8.79442	3.79486e-05	0.000183064	-	-	-	gi|207559705|gb|ACI24355.1|/2e-22/F-box DOT [Solanum pimpinellifolium]
Unigene34151_Taxus	14	0	4.44	0.01	-8.79442	3.79486e-05	0.000183014	-	-	-	gi|225561229|gb|EEH09510.1|/2e-94/T-complex protein 1 subunit epsilon [Ajellomyces capsulatus G186AR]
Unigene36436_Taxus	14	0	4.44	0.01	-8.79442	3.79486e-05	0.000182965	-	-	GO:0048864//stem cell development	gi|21280323|dbj|BAB96814.1|/0.0/AGO1 homologous protein [Oryza sativa Japonica Group]
Unigene7204_Taxus	14	0	4.44	0.01	-8.79442	3.79486e-05	0.000182915	-	-	-	gi|172052532|dbj|BAG16727.1|/7e-34/basic region leucine zipper protein [Triticum aestivum]
Unigene23461_Taxus	14	0	4.44	0.01	-8.79442	3.79486e-05	0.000182866	-	-	-	-
Unigene35131_Taxus	14	0	4.44	0.01	-8.79442	3.79486e-05	0.000182816	-	-	-	gi|32811532|gb|AAP87773.1|/1e-172/ribulose-1,5-bisphosphate carboxylase/oxygenase large subunit [Ceratozamia miqueliana]
Unigene33952_Taxus	14	0	4.44	0.01	-8.79442	3.79486e-05	0.000182767	-	-	-	gi|58263410|ref|XP_569115.1|/4e-06/GTPase [Cryptococcus neoformans var. neoformans JEC21]
Unigene14348_Taxus	14	0	4.44	0.01	-8.79442	3.79486e-05	0.000182717	-	-	-	gi|93140582|sp|Q2U0E0.1|PPID_ASPOR/6e-68/RecName: Full=Peptidyl-prolyl cis-trans isomerase D; Short=PPIase D; AltName: Full=Rotamase D
Unigene33401_Taxus	14	0	4.44	0.01	-8.79442	3.79486e-05	0.000182668	-	GO:0005506//iron ion binding;GO:0046429//4-hydroxy-3-methylbut-2-en-1-yl diphosphate synthase activity	GO:0016114//terpenoid biosynthetic process	gi|224006295|ref|XP_002292108.1|/6e-41/gcpe-like protein [Thalassiosira pseudonana CCMP1335] >gi|220972627|gb|EED90959.1| gcpe-like protein [Thalassiosira pseudonana CCMP1335]
Unigene7619_Taxus	14	0	4.44	0.01	-8.79442	3.79486e-05	0.000182619	-	-	-	gi|22330983|ref|NP_683551.1|/5e-10/acyltransferase [Arabidopsis thaliana]
Unigene4357_Taxus	14	0	4.44	0.01	-8.79442	3.79486e-05	0.000182569	-	-	-	gi|190898734|gb|ACE97880.1|/1e-23/S-adenosylmethionine-dependent methyltransferase [Populus tremula] >gi|190898738|gb|ACE97882.1| S-adenosylmethionine-dependent methyltransferase [Populus tremula] >gi|190898780|gb|ACE97903.1| S-adenosylmethionine-dependent methyltransferase [Populus tremula] >gi|190898782|gb|ACE97904.1| S-adenosylmethionine-dependent methyltransferase [Populus tremula]
Unigene21269_Taxus	14	0	4.44	0.01	-8.79442	3.79486e-05	0.00018252	-	-	-	gi|50957226|gb|AAT91065.1|/1e-147/ent-kaurene oxidase KO4 [Oryza sativa Japonica Group]
Unigene4985_Taxus	14	0	4.44	0.01	-8.79442	3.79486e-05	0.000182471	-	-	-	-
Unigene23918_Taxus	14	0	4.44	0.01	-8.79442	3.79486e-05	0.000182422	GO:0005789//endoplasmic reticulum membrane;GO:0005773//vacuole;GO:0005777//peroxisome;GO:0016023//cytoplasmic membrane-bounded vesicle;GO:0005576//extracellular region	GO:0004185//serine-type carboxypeptidase activity	GO:0006508//proteolysis	gi|15237178|ref|NP_197689.1|/5e-27/scpl47 (serine carboxypeptidase-like 47); serine-type carboxypeptidase [Arabidopsis thaliana] >gi|75333743|sp|Q9FFB0.1|SCP47_ARATH RecName: Full=Serine carboxypeptidase-like 47; Flags: Precursor >gi|10177245|dbj|BAB10619.1| serine carboxypeptidase [Arabidopsis thaliana]
Unigene35986_Taxus	14	0	4.44	0.01	-8.79442	3.79486e-05	0.000182372	-	-	-	gi|15218697|ref|NP_171804.1|/3e-30/epsin N-terminal homology (ENTH) domain-containing protein / clathrin assembly protein-related [Arabidopsis thaliana] >gi|46396022|sp|Q9SA65.1|CAP4_ARATH RecName: Full=Putative clathrin assembly protein At1g03050 >gi|4587573|gb|AAD25804.1|AC006550_12 Similar to clathrin assembly protein gb|AF041374 (CALM) from Rattus norvegicus [Arabidopsis thaliana] >gi|9180573…
Unigene24111_Taxus	14	0	4.44	0.01	-8.79442	3.79486e-05	0.000182323	-	-	-	gi|82568687|dbj|BAE48656.1|/2e-10/aquaporin [Prunus mume]
Unigene32297_Taxus	14	0	4.44	0.01	-8.79442	3.79486e-05	0.000182274	-	-	-	gi|146148622|gb|ABQ02253.1|/9e-45/O-acetylserine (thiol)lyase [Glycine soja]
Unigene34131_Taxus	14	0	4.44	0.01	-8.79442	3.79486e-05	0.000182225	-	-	-	gi|15239344|ref|NP_200857.1|/2e-43/FLA12 [Arabidopsis thaliana] >gi|116247779|sp|Q8LEE9.2|FLA12_ARATH RecName: Full=Fasciclin-like arabinogalactan protein 12; Flags: Precursor
Unigene17820_Taxus	14	0	4.44	0.01	-8.79442	3.79486e-05	0.000182176	-	-	-	gi|148910486|gb|ABR18318.1|/3e-20/unknown [Picea sitchensis]
Unigene10058_Taxus	14	0	4.44	0.01	-8.79442	3.79486e-05	0.000182127	-	-	-	gi|115467092|ref|NP_001057145.1|/4e-51/Os06g0216300 [Oryza sativa (japonica cultivar-group)] >gi|60687503|pir||JC8028 cis-12-oxo-phytodienoic acid-reductase 1 - rice >gi|23495288|dbj|BAC20139.1| 12-oxophytodienoic acid reductase [Oryza sativa] >gi|30140333|emb|CAD89604.1| oxo-phytodienoic acid reductase [Oryza sativa (japonica cultivar-group)] >gi|49532745|dbj|BAD26703.1| 12-oxo-phytodienoic acid…
Unigene12349_Taxus	14	0	4.44	0.01	-8.79442	3.79486e-05	0.000182078	GO:0016023//cytoplasmic membrane-bounded vesicle;GO:0009341//beta-galactosidase complex	GO:0004565//beta-galactosidase activity;GO:0005529//sugar binding;GO:0043169//cation binding	GO:0005975//carbohydrate metabolic process	gi|222424922|dbj|BAH20412.1|/3e-59/AT3G13750 [Arabidopsis thaliana]
Unigene19153_Taxus	14	0	4.44	0.01	-8.79442	3.79486e-05	0.000182029	-	-	-	gi|162460995|ref|NP_001104959.1|/2e-57/cellulose synthase-9 [Zea mays] >gi|9622890|gb|AAF89969.1|AF200533_1 cellulose synthase-9 [Zea mays]
Unigene13964_Taxus	14	0	4.44	0.01	-8.79442	3.79486e-05	0.00018198	-	GO:0016491//oxidoreductase activity	GO:0008152//metabolic process	gi|16118902|gb|AAL14651.1|/1e-14/2-oxoglutarate-dependent dioxygenase [Arabidopsis thaliana]
Unigene23770_Taxus	14	0	4.44	0.01	-8.79442	3.79486e-05	0.000181931	-	GO:0046872//metal ion binding;GO:0016491//oxidoreductase activity	GO:0008152//metabolic process	gi|163140886|gb|ABY26553.1|/8e-06/ACC oxidase [Lilium hybrid cultivar]
Unigene7063_Taxus	14	0	4.44	0.01	-8.79442	3.79486e-05	0.000181882	-	-	-	-
Unigene1040_Taxus	14	0	4.44	0.01	-8.79442	3.79486e-05	0.000181833	-	-	-	-
Unigene34324_Taxus	14	0	4.44	0.01	-8.79442	3.79486e-05	0.000181784	-	-	-	gi|20502784|gb|AAM22625.1|AF428178_1/1e-95/expansin 11 precursor [Rumex palustris]
Unigene10993_Taxus	13	0	4.12	0.01	-8.6865	7.83402e-05	0.00035261	GO:0005634//nucleus	-	GO:0016036//cellular response to phosphate starvation	gi|240105779|gb|EER23972.1|/5e-07/SPX domain containing protein [Coccidioides posadasii C735 delta SOWgp]
Unigene34440_Taxus	13	0	4.12	0.01	-8.6865	7.83402e-05	0.000352521	-	-	-	gi|51209885|ref|YP_063549.1|/5e-68/chaperonin GroEL [Gracilaria tenuistipitata var. liui] >gi|68052108|sp|Q6B911.1|CH60_GRATL RecName: Full=60 kDa chaperonin, chloroplastic; AltName: Full=Protein Cpn60; AltName: Full=groEL protein >gi|50657639|gb|AAT79624.1| 60 kDa chaperonin [Gracilaria tenuistipitata var. liui]
Unigene20178_Taxus	13	0	4.12	0.01	-8.6865	7.83402e-05	0.000352432	-	GO:0005488//binding	-	gi|15219772|ref|NP_176260.1|/1e-39/protein binding / zinc ion binding [Arabidopsis thaliana] >gi|42571929|ref|NP_974055.1| protein binding / zinc ion binding [Arabidopsis thaliana] >gi|186492061|ref|NP_001117519.1| protein binding / zinc ion binding [Arabidopsis thaliana] >gi|66865906|gb|AAY57587.1| RING finger family protein [Arabidopsis thaliana] >gi|115311449|gb|ABI93905.1| At1g60610 [Arabidop…
Unigene34935_Taxus	13	0	4.12	0.01	-8.6865	7.83402e-05	0.000352343	-	-	-	gi|108864009|gb|ABA91534.2|/8e-97/ABC transporter family protein, expressed [Oryza sativa (japonica cultivar-group)]
Unigene9836_Taxus	13	0	4.12	0.01	-8.6865	7.83402e-05	0.000352254	-	-	-	gi|162459967|ref|NP_001105928.1|/2e-71/brittle stalk2 [Zea mays] >gi|116563464|gb|ABJ99754.1| brittle stalk-2 [Zea mays] >gi|195635919|gb|ACG37428.1| COBRA-like protein 4 precursor [Zea mays]
Unigene28714_Taxus	13	0	4.12	0.01	-8.6865	7.83402e-05	0.000352165	-	-	-	gi|151941535|gb|EDN59898.1|/2e-16/ubiquitin ligase e3 [Saccharomyces cerevisiae YJM789]
Unigene21554_Taxus	13	0	4.12	0.01	-8.6865	7.83402e-05	0.000352076	-	-	-	gi|2500354|sp|P93847.1|RL10_SOLME/1e-29/RecName: Full=60S ribosomal protein L10; AltName: Full=EQM >gi|1902894|dbj|BAA19462.1| QM family protein [Solanum melongena]
Unigene4098_Taxus	13	0	4.12	0.01	-8.6865	7.83402e-05	0.000351988	-	-	-	-
Unigene33373_Taxus	13	0	4.12	0.01	-8.6865	7.83402e-05	0.000351899	-	-	-	gi|9758187|dbj|BAB08572.1|/1e-24/RNA-binding protein-like [Arabidopsis thaliana]
Unigene12493_Taxus	13	0	4.12	0.01	-8.6865	7.83402e-05	0.00035181	-	-	-	gi|75150902|sp|Q8GW72.1|FUCO1_ARATH/1e-139/RecName: Full=Alpha-L-fucosidase 1; AltName: Full=Alpha-L-fucoside fucohydrolase; AltName: Full=Alpha-1,3/4-fucosidase; Short=AtFUC1; Flags: Precursor
Unigene32591_Taxus	13	0	4.12	0.01	-8.6865	7.83402e-05	0.000351721	-	-	-	gi|49645192|emb|CAG98764.1|/3e-19/KLLA0F21868p [Kluyveromyces lactis]
Unigene15915_Taxus	13	0	4.12	0.01	-8.6865	7.83402e-05	0.000351633	-	-	-	gi|225441127|ref|XP_002265442.1|/5e-20/PREDICTED: hypothetical protein [Vitis vinifera] >gi|270243237|emb|CBI30177.1| unnamed protein product [Vitis vinifera]
Unigene6658_Taxus	13	0	4.12	0.01	-8.6865	7.83402e-05	0.000351544	-	-	-	gi|15231585|ref|NP_191444.1|/6e-06/PAR2 (PHY RAPIDLY REGULATED 2) [Arabidopsis thaliana] >gi|40822815|gb|AAR92241.1| At3g58850 [Arabidopsis thaliana] >gi|45752672|gb|AAS76234.1| At3g58850 [Arabidopsis thaliana] >gi|160858153|emb|CAP19901.1| helix-loop-helix protein [Arabidopsis thaliana]
Unigene31107_Taxus	13	0	4.12	0.01	-8.6865	7.83402e-05	0.000351456	-	-	-	gi|18396193|ref|NP_565330.1|/1e-43/subtilase family protein [Arabidopsis thaliana]
Unigene33217_Taxus	13	0	4.12	0.01	-8.6865	7.83402e-05	0.000351367	-	-	-	gi|52077086|dbj|BAD46117.1|/1e-15/Bet v I allergen-like [Oryza sativa Japonica Group]
Unigene5091_Taxus	13	0	4.12	0.01	-8.6865	7.83402e-05	0.000351279	-	-	-	gi|115451211|ref|NP_001049206.1|/4e-06/Os03g0187000 [Oryza sativa (japonica cultivar-group)] >gi|108706571|gb|ABF94366.1| expressed protein [Oryza sativa (japonica cultivar-group)] >gi|113547677|dbj|BAF11120.1| Os03g0187000 [Oryza sativa Japonica Group]
Unigene11049_Taxus	13	0	4.12	0.01	-8.6865	7.83402e-05	0.00035119	-	-	-	gi|226529549|ref|NP_001150308.1|/1e-123/endonuclease, polyU-specific [Zea mays] >gi|195638272|gb|ACG38604.1| placental protein 11 precursor [Zea mays]
Unigene20794_Taxus	13	0	4.12	0.01	-8.6865	7.83402e-05	0.000351102	-	-	-	gi|77551276|gb|ABA94073.1|/4e-95/DHHC zinc finger domain containing protein, expressed [Oryza sativa (japonica cultivar-group)] >gi|255680145|dbj|BAF28386.2| Os11g0534300 [Oryza sativa Japonica Group]
Unigene19032_Taxus	13	0	4.12	0.01	-8.6865	7.83402e-05	0.000351014	-	-	-	gi|213404850|ref|XP_002173197.1|/8e-10/thiamine-repressible acid phosphatase pho4 [Schizosaccharomyces japonicus yFS275] >gi|212001244|gb|EEB06904.1| thiamine-repressible acid phosphatase pho4 [Schizosaccharomyces japonicus yFS275]
Unigene1798_Taxus	13	0	4.12	0.01	-8.6865	7.83402e-05	0.000350925	-	-	-	gi|226502400|ref|NP_001147674.1|/5e-12/anthocyanidin 3-O-glucosyltransferase [Zea mays] >gi|195613008|gb|ACG28334.1| anthocyanidin 3-O-glucosyltransferase [Zea mays]
Unigene8867_Taxus	13	0	4.12	0.01	-8.6865	7.83402e-05	0.000350837	-	-	-	gi|159470957|ref|XP_001693623.1|/6e-94/histone acetyltransferase [Chlamydomonas reinhardtii] >gi|158283126|gb|EDP08877.1| histone acetyltransferase [Chlamydomonas reinhardtii]
Unigene10080_Taxus	13	0	4.12	0.01	-8.6865	7.83402e-05	0.000350749	-	-	-	gi|15235787|ref|NP_194007.1|/6e-06/pentatricopeptide (PPR) repeat-containing protein [Arabidopsis thaliana]
Unigene8662_Taxus	13	0	4.12	0.01	-8.6865	7.83402e-05	0.000350661	-	-	-	gi|172045716|sp|Q6AU53.2|CSLC9_ORYSJ/1e-17/RecName: Full=Probable xyloglucan glycosyltransferase 9; AltName: Full=Cellulose synthase-like protein C9; AltName: Full=OsCslC9 >gi|16974749|gb|AAL32452.1| CSLC9 [Oryza sativa]
Unigene36050_Taxus	13	0	4.12	0.01	-8.6865	7.83402e-05	0.000350573	-	-	-	gi|115388677|ref|XP_001211844.1|/5e-06/cholinesterase [Aspergillus terreus NIH2624] >gi|114195928|gb|EAU37628.1| cholinesterase [Aspergillus terreus NIH2624]
Unigene30863_Taxus	13	0	4.12	0.01	-8.6865	7.83402e-05	0.000350485	-	-	-	gi|224136542|ref|XP_002326886.1|/1e-13/cytochrome P450 [Populus trichocarpa] >gi|222835201|gb|EEE73636.1| cytochrome P450 [Populus trichocarpa]
Unigene882_Taxus	13	0	4.12	0.01	-8.6865	7.83402e-05	0.000350397	-	-	-	gi|255677892|dbj|BAF21934.2|/8e-10/Os07g0567300 [Oryza sativa Japonica Group]
Unigene16121_Taxus	13	0	4.12	0.01	-8.6865	7.83402e-05	0.000350309	-	-	-	gi|207342241|gb|EDZ70061.1|/8e-55/YMR165Cp-like protein [Saccharomyces cerevisiae AWRI1631]
Unigene32088_Taxus	13	0	4.12	0.01	-8.6865	7.83402e-05	0.000350221	-	-	-	-
Unigene14847_Taxus	13	0	4.12	0.01	-8.6865	7.83402e-05	0.000350133	-	-	-	gi|199434472|emb|CAG91065.2|/3e-50/DEHA2G23276p [Debaryomyces hansenii]
Unigene15504_Taxus	13	0	4.12	0.01	-8.6865	7.83402e-05	0.000350045	-	-	-	gi|115467824|ref|NP_001057511.1|/2e-50/Os06g0320200 [Oryza sativa (japonica cultivar-group)]
Unigene1288_Taxus	13	0	4.12	0.01	-8.6865	7.83402e-05	0.000349958	-	-	-	gi|15230882|ref|NP_191347.1|/1e-30/C2 domain-containing protein [Arabidopsis thaliana] >gi|6729531|emb|CAB67616.1| anthranilate phosphoribosyltransferase-like protein [Arabidopsis thaliana]
Unigene17525_Taxus	13	0	4.12	0.01	-8.6865	7.83402e-05	0.00034987	-	-	-	gi|225558713|gb|EEH06997.1|/0.0/cation-transporting ATPase [Ajellomyces capsulatus G186AR]
Unigene23734_Taxus	13	0	4.12	0.01	-8.6865	7.83402e-05	0.000349782	-	-	-	-
Unigene5458_Taxus	13	0	4.12	0.01	-8.6865	7.83402e-05	0.000349694	-	-	-	gi|224130916|ref|XP_002320956.1|/3e-34/anion exchanger family protein [Populus trichocarpa] >gi|222861729|gb|EEE99271.1| anion exchanger family protein [Populus trichocarpa]
Unigene96_Taxus	13	0	4.12	0.01	-8.6865	7.83402e-05	0.000349607	-	-	-	gi|3024590|sp|Q05900.1|RU1C_YEAST/6e-06/RecName: Full=U1 small nuclear ribonucleoprotein C homolog; Short=U1 snRNP C; Short=U1-C; Short=U1C >gi|596051|gb|AAB67343.1| Ylr298cp [Saccharomyces cerevisiae] >gi|51012973|gb|AAT92780.1| YLR298C [Saccharomyces cerevisiae] >gi|151941002|gb|EDN59383.1| U1-C [Saccharomyces cerevisiae YJM789] >gi|256269830|gb|EEU05090.1| Yhc1p [Saccharomyces cerevisiae JAY29…
Unigene30343_Taxus	13	0	4.12	0.01	-8.6865	7.83402e-05	0.000349519	-	-	-	gi|238843557|gb|EEQ33219.1|/4e-08/oxysterol-binding protein 1 [Microsporum canis CBS 113480]
Unigene31040_Taxus	13	0	4.12	0.01	-8.6865	7.83402e-05	0.000349432	-	-	-	gi|4115919|gb|AAD03430.1|/8e-11/similar to the subtilase family of serine proteases (Pfam: PF00082, score; 47.5, E=3.8e-12, n=2) [Arabidopsis thaliana]
Unigene22442_Taxus	13	0	4.12	0.01	-8.6865	7.83402e-05	0.000349344	-	-	-	gi|42567964|ref|NP_197475.2|/3e-06/peptidase M28 family protein [Arabidopsis thaliana] >gi|30725320|gb|AAP37682.1| At5g19740 [Arabidopsis thaliana]
Unigene22673_Taxus	13	0	4.12	0.01	-8.6865	7.83402e-05	0.000349257	-	-	-	gi|15231303|ref|NP_190183.1|/8e-06/ATEXLA1 (ARABIDOPSIS THALIANA EXPANSIN-LIKE A1) [Arabidopsis thaliana] >gi|20138388|sp|Q9LZT4.1|EXLA1_ARATH RecName: Full=Expansin-like A1; Short=AtEXLA1; Short=At-EXPL1; Short=AtEXPL1; AltName: Full=Ath-ExpBeta-2.1; Flags: Precursor >gi|14190437|gb|AAK55699.1|AF378896_1 AT3g45970/F16L2_180 [Arabidopsis thaliana] >gi|15450563|gb|AAK96459.1| AT3g45970/F16L2_180 […
Unigene34240_Taxus	13	0	4.12	0.01	-8.6865	7.83402e-05	0.00034917	-	-	-	gi|6911553|emb|CAB72130.1|/1e-122/heat shock protein 70 [Cucumis sativus]
Unigene11621_Taxus	12	0	3.81	0.01	-8.57365	0.000161724	0.000676634	-	-	-	gi|116789738|gb|ABK25364.1|/1e-07/unknown [Picea sitchensis]
Unigene647_Taxus	12	0	3.81	0.01	-8.57365	0.000161724	0.000676475	-	-	-	-
Unigene6419_Taxus	12	0	3.81	0.01	-8.57365	0.000161724	0.000676316	-	-	-	gi|4741991|gb|AAD28791.1|AF145593_1/6e-11/calcium/calmodulin-dependent protein kinase [Nicotiana tabacum] >gi|5814095|gb|AAD52098.1|U70923_1 calcium/calmodulin-dependent protein kinase [Nicotiana tabacum]
Unigene35294_Taxus	12	0	3.81	0.01	-8.57365	0.000161724	0.000676157	-	-	-	gi|214011869|gb|ACJ61689.1|/1e-11/WOX4 [Solanum lycopersicum] >gi|214011873|gb|ACJ61691.1| WOX4 [Solanum lycopersicum]
Unigene12999_Taxus	12	0	3.81	0.01	-8.57365	0.000161724	0.000675999	-	-	-	gi|66354458|gb|AAY44864.1|/8e-63/ubiquitinating enzyme [Arabidopsis thaliana]
Unigene18960_Taxus	12	0	3.81	0.01	-8.57365	0.000161724	0.00067584	-	-	-	gi|223931075|ref|YP_002586936.1|/0.0/photosystem I P700 apoprotein A1 [Syntrichia ruralis] >gi|219562289|gb|ACL27620.1| photosystem I P700 apoprotein A1 [Syntrichia ruralis]
Unigene10269_Taxus	12	0	3.81	0.01	-8.57365	0.000161724	0.000675682	-	-	-	-
Unigene34831_Taxus	12	0	3.81	0.01	-8.57365	0.000161724	0.000675523	-	-	-	gi|238843831|gb|EEQ33493.1|/9e-06/cell cycle control protein cwf19 [Microsporum canis CBS 113480]
Unigene32003_Taxus	12	0	3.81	0.01	-8.57365	0.000161724	0.000675365	-	-	-	gi|195629842|gb|ACG36562.1|/4e-20/phosphatase [Zea mays]
Unigene32024_Taxus	12	0	3.81	0.01	-8.57365	0.000161724	0.000675206	-	-	-	gi|115460548|ref|NP_001053874.1|/1e-18/Os04g0616000 [Oryza sativa (japonica cultivar-group)] >gi|38344261|emb|CAD41798.2| OSJNBa0008M17.14 [Oryza sativa (japonica cultivar-group)] >gi|113565445|dbj|BAF15788.1| Os04g0616000 [Oryza sativa Japonica Group]
Unigene21472_Taxus	12	0	3.81	0.01	-8.57365	0.000161724	0.000675048	-	-	-	gi|238846173|gb|EEQ35835.1|/1e-42/HsKin17 protein [Microsporum canis CBS 113480]
Unigene1921_Taxus	12	0	3.81	0.01	-8.57365	0.000161724	0.00067489	-	-	-	gi|45190721|ref|NP_984975.1|/4e-35/AER115Wp [Ashbya gossypii ATCC 10895] >gi|44983700|gb|AAS52799.1| AER115Wp [Ashbya gossypii ATCC 10895]
Unigene28069_Taxus	12	0	3.81	0.01	-8.57365	0.000161724	0.000674732	-	-	-	gi|115477497|ref|NP_001062344.1|/8e-22/Os08g0532900 [Oryza sativa (japonica cultivar-group)] >gi|42761389|dbj|BAD11657.1| coated vesicle membrane protein-like [Oryza sativa Japonica Group] >gi|113624313|dbj|BAF24258.1| Os08g0532900 [Oryza sativa Japonica Group]
Unigene16714_Taxus	12	0	3.81	0.01	-8.57365	0.000161724	0.000674574	-	GO:0016491//oxidoreductase activity;GO:0005488//binding	GO:0055114//oxidation reduction;GO:0046685//response to arsenic	gi|14326547|gb|AAK60318.1|AF385727_1/8e-48/AT3g03980/T11I18_9 [Arabidopsis thaliana] >gi|23505923|gb|AAN28821.1| At3g03980/T11I18_9 [Arabidopsis thaliana]
Unigene33123_Taxus	12	0	3.81	0.01	-8.57365	0.000161724	0.000674416	GO:0000276//mitochondrial proton-transporting ATP synthase complex, coupling factor F(o)	GO:0015078//hydrogen ion transmembrane transporter activity	GO:0015986//ATP synthesis coupled proton transport	gi|115465089|ref|NP_001056144.1|/1e-39/Os05g0533800 [Oryza sativa (japonica cultivar-group)] >gi|113579695|dbj|BAF18058.1| Os05g0533800 [Oryza sativa Japonica Group]
Unigene28213_Taxus	12	0	3.81	0.01	-8.57365	0.000161724	0.000674258	-	-	-	-
Unigene16502_Taxus	12	0	3.81	0.01	-8.57365	0.000161724	0.000674101	-	-	-	gi|224284200|gb|ACN39836.1|/2e-07/unknown [Picea sitchensis]
Unigene27434_Taxus	12	0	3.81	0.01	-8.57365	0.000161724	0.000673943	-	-	-	gi|224117684|ref|XP_002317642.1|/3e-23/aquaporin, MIP family, NIP subfamily [Populus trichocarpa] >gi|222860707|gb|EEE98254.1| aquaporin, MIP family, NIP subfamily [Populus trichocarpa]
Unigene34945_Taxus	12	0	3.81	0.01	-8.57365	0.000161724	0.000673785	-	-	-	gi|261198294|ref|XP_002625549.1|/2e-71/26S proteasome regulatory subunit rpn-1 [Ajellomyces dermatitidis SLH14081] >gi|239595512|gb|EEQ78093.1| 26S proteasome regulatory subunit rpn-1 [Ajellomyces dermatitidis SLH14081] >gi|239607862|gb|EEQ84849.1| 26S proteasome regulatory subunit rpn-1 [Ajellomyces dermatitidis ER-3]
Unigene10300_Taxus	12	0	3.81	0.01	-8.57365	0.000161724	0.000673628	-	-	-	gi|75755957|gb|ABA27034.1|/3e-16/TO66-1 [Taraxacum officinale]
Unigene9408_Taxus	12	0	3.81	0.01	-8.57365	0.000161724	0.00067347	-	-	-	-
Unigene34883_Taxus	12	0	3.81	0.01	-8.57365	0.000161724	0.000673313	-	-	-	gi|115475631|ref|NP_001061412.1|/4e-09/Os08g0269000 [Oryza sativa (japonica cultivar-group)] >gi|113623381|dbj|BAF23326.1| Os08g0269000 [Oryza sativa Japonica Group]
Unigene11820_Taxus	12	0	3.81	0.01	-8.57365	0.000161724	0.000673156	-	-	-	gi|115472511|ref|NP_001059854.1|/5e-11/Os07g0531700 [Oryza sativa (japonica cultivar-group)] >gi|113611390|dbj|BAF21768.1| Os07g0531700 [Oryza sativa Japonica Group]
Unigene4457_Taxus	12	0	3.81	0.01	-8.57365	0.000161724	0.000672998	-	-	-	gi|115463017|ref|NP_001055108.1|/7e-07/Os05g0294600 [Oryza sativa (japonica cultivar-group)] >gi|113578659|dbj|BAF17022.1| Os05g0294600 [Oryza sativa Japonica Group]
Unigene26988_Taxus	12	0	3.81	0.01	-8.57365	0.000161724	0.000672841	-	-	-	gi|14787119|dbj|BAB62078.1|/7e-39/transketolase [Polygonum tinctorium]
Unigene34840_Taxus	12	0	3.81	0.01	-8.57365	0.000161724	0.000672684	-	-	-	gi|115485159|ref|NP_001067723.1|/1e-14/Os11g0296800 [Oryza sativa (japonica cultivar-group)] >gi|77549991|gb|ABA92788.1| expressed protein [Oryza sativa (japonica cultivar-group)]
Unigene13771_Taxus	12	0	3.81	0.01	-8.57365	0.000161724	0.000672527	-	-	GO:0019762//glucosinolate catabolic process;GO:0080028//nitrile biosynthetic process	gi|255935653|ref|XP_002558853.1|/1e-45/Pc13g04170 [Penicillium chrysogenum Wisconsin 54-1255] >gi|211583473|emb|CAP91486.1| Pc13g04170 [Penicillium chrysogenum Wisconsin 54-1255]
Unigene3119_Taxus	12	0	3.81	0.01	-8.57365	0.000161724	0.00067237	-	-	-	gi|28140166|gb|AAO26313.1|/6e-46/receptor-like protein kinase [Elaeis guineensis]
Unigene22756_Taxus	12	0	3.81	0.01	-8.57365	0.000161724	0.000672213	-	-	-	-
Unigene31385_Taxus	12	0	3.81	0.01	-8.57365	0.000161724	0.000672056	-	-	-	gi|194476713|ref|YP_002048892.1|/1e-06/glutamyl-tRNA (Gln) amidotransferase subunit A [Paulinella chromatophora] >gi|171191720|gb|ACB42682.1| glutamyl-tRNA (Gln) amidotransferase subunit A [Paulinella chromatophora]
Unigene19250_Taxus	12	0	3.81	0.01	-8.57365	0.000161724	0.0006719	-	-	-	gi|170286899|dbj|BAG13451.1|/1e-133/beta-glucosidase [Rosa hybrid cultivar]
Unigene34388_Taxus	12	0	3.81	0.01	-8.57365	0.000161724	0.000671743	-	-	-	gi|197259946|gb|ACH56522.1|/5e-70/leucoanthoxyanidin dioxygenase [Gossypium hirsutum]
Unigene20239_Taxus	12	0	3.81	0.01	-8.57365	0.000161724	0.000671586	-	-	-	gi|255583978|ref|XP_002532735.1|/1e-07/hypothetical protein RCOM_1749890 [Ricinus communis] >gi|223527512|gb|EEF29637.1| hypothetical protein RCOM_1749890 [Ricinus communis]
Unigene2001_Taxus	22026	64	6984.58	19.07	-8.51672	0	0	-	-	-	-
Unigene14890_Taxus	3456	17	1095.92	5.06	-7.75879	0	0	-	-	-	gi|56609042|gb|AAW03151.1|/4e-90/taxane 10-beta-hydroxylase [Ozonium sp. BT2] >gi|59804227|gb|AAX08091.1| P450 taxane 10-beta-hydroxylase [Ozonium sp. BT2]
Unigene19098_Taxus	379	2	120.18	0.6	-7.64602	9.33122e-116	5.03744e-114	-	-	-	-
Unigene2886_Taxus	717	4	227.37	1.19	-7.57794	1.52892e-217	9.01909e-216	-	-	-	-
Unigene24204_Taxus	697	6	221.02	1.79	-6.94807	1.18718e-207	6.93432e-206	GO:0005737//cytoplasm	GO:0005506//iron ion binding;GO:0016165//lipoxygenase activity	GO:0006633//fatty acid biosynthetic process;GO:0009611//response to wounding;GO:0051707//response to other organism;GO:0022900//electron transport chain	gi|218092006|emb|CAP59449.1|/3e-17/lipoxygenase [Momordica charantia]
Unigene11489_Taxus	402	4	127.48	1.19	-6.74317	2.21872e-119	1.21247e-117	-	-	-	gi|6856103|gb|AAF29773.1|/5e-06/glutathione S-transferase [Gossypium hirsutum]
Unigene20390_Taxus	193	2	61.2	0.6	-6.67243	8.7504e-58	3.69404e-56	-	-	-	gi|28380205|sp|Q9AXM6.1|T10H_TAXCU/1e-107/RecName: Full=Taxane 10-beta-hydroxylase; AltName: Full=5-alpha-taxadienol-10-beta-hydroxylase; AltName: Full=Cytochrome P450 725A1 >gi|12656592|gb|AAK00946.1|AF318211_1 5-alpha-taxadienol-10-beta-hydroxylase [Taxus cuspidata]
Unigene4962_Taxus	2484	26	787.69	7.75	-6.66729	0	0	-	-	-	-
Unigene34738_Taxus	735	8	233.07	2.38	-6.61366	4.67652e-216	2.74053e-214	-	-	-	gi|226497306|ref|NP_001150890.1|/4e-50/sex determination protein tasselseed-2 [Zea mays] >gi|195642674|gb|ACG40805.1| sex determination protein tasselseed-2 [Zea mays]
Unigene16974_Taxus	174	2	55.18	0.6	-6.52304	6.83384e-52	2.75441e-50	-	-	-	gi|224815364|gb|ACN65827.1|/1e-104/flavonoid 3'-hydroxylase [Centaurea cyanus]
Unigene2795_Taxus	168	2	53.27	0.6	-6.47222	4.93766e-50	1.96349e-48	-	-	-	-
Unigene18650_Taxus	158	2	50.1	0.6	-6.3837	6.15476e-47	2.37331e-45	-	-	-	gi|224067242|ref|XP_002302426.1|/1e-112/cytochrome P450 [Populus trichocarpa] >gi|222844152|gb|EEE81699.1| cytochrome P450 [Populus trichocarpa]
Unigene18066_Taxus	233	3	73.89	0.89	-6.37543	1.32779e-68	6.08088e-67	-	-	-	gi|213402247|ref|XP_002171896.1|/5e-34/glycerophosphodiester phosphodiesterase gde1 [Schizosaccharomyces japonicus yFS275] >gi|211999943|gb|EEB05603.1| glycerophosphodiester phosphodiesterase gde1 [Schizosaccharomyces japonicus yFS275]
Unigene1250_Taxus	147	2	46.61	0.6	-6.27953	1.55095e-43	5.80465e-42	-	-	-	gi|15236267|ref|NP_195236.1|/1e-124/PIP3 (PLASMA MEMBRANE INTRINSIC PROTEIN 3); water channel [Arabidopsis thaliana] >gi|32363271|sp|P93004.2|PIP27_ARATH RecName: Full=Aquaporin PIP2-7; AltName: Full=Plasma membrane intrinsic protein 2-7; Short=AtPIP2;7; AltName: Full=Plasma membrane intrinsic protein 3; AltName: Full=Salt stress-induced major intrinsic protein >gi|15724340|gb|AAL06563.1|AF412110…
Unigene23685_Taxus	145	2	45.98	0.6	-6.2599	6.43504e-43	2.38834e-41	-	-	GO:0050896//response to stimulus	gi|76782070|gb|ABA54807.1|/4e-17/pathogenesis-related protein 10-3.3-like [Picea abies]
Unigene31248_Taxus	142	2	45.03	0.6	-6.22978	5.43482e-42	1.97192e-40	-	-	-	gi|115456719|ref|NP_001051960.1|/2e-07/Os03g0858200 [Oryza sativa (japonica cultivar-group)] >gi|108712206|gb|ABG00001.1| expressed protein [Oryza sativa (japonica cultivar-group)] >gi|113550431|dbj|BAF13874.1| Os03g0858200 [Oryza sativa Japonica Group]
Unigene33460_Taxus	402	6	127.48	1.79	-6.15417	3.29622e-116	1.78487e-114	-	GO:0008270//zinc ion binding;GO:0016491//oxidoreductase activity	GO:0055114//oxidation reduction	gi|34013695|gb|AAQ55962.1|/1e-64/10-hydroxygeraniol oxidoreductase [Catharanthus roseus]
Unigene17595_Taxus	189	3	59.93	0.89	-6.07333	5.08408e-55	2.08693e-53	-	-	-	gi|226502604|ref|NP_001147572.1|/2e-79/flavonoid 3-monooxygenase [Zea mays] >gi|195612262|gb|ACG27961.1| flavonoid 3-monooxygenase [Zea mays]
Unigene17688_Taxus	177	3	56.13	0.89	-5.97882	2.51202e-51	1.01019e-49	-	-	-	gi|15228011|ref|NP_181813.1|/4e-86/CYP718; electron carrier/ heme binding / iron ion binding / monooxygenase/ oxygen binding [Arabidopsis thaliana] >gi|111074222|gb|ABH04484.1| At2g42850 [Arabidopsis thaliana]
Unigene7961_Taxus	287	5	91.01	1.49	-5.93264	2.8229e-82	1.40083e-80	-	-	-	gi|15221265|ref|NP_177591.1|/2e-06/kelch repeat-containing F-box family protein [Arabidopsis thaliana] >gi|30699022|ref|NP_849884.1| kelch repeat-containing F-box family protein [Arabidopsis thaliana] >gi|75169842|sp|Q9CA63.1|FBK29_ARATH RecName: Full=F-box/kelch-repeat protein At1g74510
Unigene26914_Taxus	115	2	36.47	0.6	-5.9256	1.13797e-33	3.73351e-32	-	-	-	-
Unigene21200_Taxus	282	5	89.42	1.49	-5.90721	9.708e-81	4.80411e-79	-	-	-	gi|58618156|gb|AAW80644.1|/1e-172/phenylalanine ammonia lyase [Pteridium aquilinum]
Unigene21027_Taxus	107	2	33.93	0.6	-5.82146	3.26366e-31	1.01825e-29	-	-	-	gi|42557351|dbj|BAD11071.1|/6e-06/hin1 like protein [Capsicum chinense]
Unigene32255_Taxus	105	2	33.3	0.6	-5.79442	1.34095e-30	4.1402e-29	-	-	-	gi|1370589|emb|CAA66948.1|/8e-06/protein induced upon tuberization [Solanum demissum]
Unigene18706_Taxus	201	4	63.74	1.19	-5.74317	2.71332e-57	1.13203e-55	-	-	-	-
Unigene21347_Taxus	146	3	46.3	0.89	-5.70106	8.19704e-42	2.96207e-40	-	-	-	gi|115438703|ref|NP_001043631.1|/1e-115/Os01g0627400 [Oryza sativa (japonica cultivar-group)] >gi|54290254|dbj|BAD61186.1| cytochrome P450-like [Oryza sativa Japonica Group] >gi|54290354|dbj|BAD61158.1| cytochrome P450-like [Oryza sativa Japonica Group] >gi|113533162|dbj|BAF05545.1| Os01g0627400 [Oryza sativa Japonica Group]
Unigene483_Taxus	95	2	30.13	0.6	-5.65009	1.55338e-27	4.49243e-26	-	-	-	gi|70999880|ref|XP_754657.1|/7e-06/RNA binding protein [Aspergillus fumigatus Af293]
Unigene4099_Taxus	1305	28	413.82	8.34	-5.63281	0	0	-	-	-	gi|27447206|gb|AAL92873.1|/3e-20/glutathione S-transferase-like protein [Solanum lycopersicum]
Unigene21327_Taxus	138	3	43.76	0.89	-5.61966	2.29372e-39	8.12378e-38	-	-	-	gi|7270328|emb|CAB80096.1|/1e-109/male sterility 2-like protein [Arabidopsis thaliana]
Unigene26908_Taxus	229	5	72.62	1.49	-5.60698	1.68868e-64	7.48352e-63	-	-	-	-
Unigene16069_Taxus	91	2	28.86	0.6	-5.58796	2.59662e-26	7.30786e-25	-	-	-	gi|15229333|ref|NP_191841.1|/4e-16/invertase/pectin methylesterase inhibitor family protein [Arabidopsis thaliana]
Unigene12891_Taxus	1298	29	411.6	8.64	-5.57407	0	0	-	-	-	gi|116791734|gb|ABK26089.1|/2e-06/unknown [Picea sitchensis]
Unigene22011_Taxus	263	6	83.4	1.79	-5.54202	1.53619e-73	7.27853e-72	-	-	-	-
Unigene26177_Taxus	130	3	41.22	0.89	-5.5334	6.35742e-37	2.16968e-35	GO:0016023//cytoplasmic membrane-bounded vesicle;GO:0009535//chloroplast thylakoid membrane	-	-	gi|255679332|dbj|BAH94835.1|/7e-13/Os10g0361350 [Oryza sativa Japonica Group]
Unigene18804_Taxus	86	2	27.27	0.6	-5.50621	8.73196e-25	2.36773e-23	-	-	-	gi|115473903|ref|NP_001060550.1|/2e-64/Os07g0663500 [Oryza sativa (japonica cultivar-group)]
Unigene29841_Taxus	85	2	26.95	0.6	-5.48918	1.76253e-24	4.71463e-23	GO:0016023//cytoplasmic membrane-bounded vesicle	GO:0015297//antiporter activity	GO:0009835//ripening	gi|15223391|ref|NP_174585.1|/1e-16/MATE efflux family protein [Arabidopsis thaliana]
Unigene3352_Taxus	122	3	38.69	0.89	-5.44201	1.74328e-34	5.77258e-33	-	-	-	gi|30984590|gb|AAP42758.1|/3e-16/At5g25770 [Arabidopsis thaliana]
Unigene6710_Taxus	157	4	49.79	1.19	-5.38682	7.3379e-44	2.7579e-42	-	-	-	-
Unigene6496_Taxus	102	3	32.34	0.89	-5.18337	2.05062e-28	6.03831e-27	-	-	-	gi|14194135|gb|AAK56262.1|AF367273_1/3e-88/AT5g44790/K23L20_14 [Arabidopsis thaliana]
Unigene6368_Taxus	136	4	43.13	1.19	-5.17966	1.71437e-37	5.88468e-36	-	-	-	gi|6671365|gb|AAF23176.1|AF216497_1/0.0/P-glycoprotein [Gossypium hirsutum]
Unigene8765_Taxus	94	3	29.81	0.89	-5.06585	5.34472e-26	1.49008e-24	-	-	-	gi|134142356|gb|ABO61514.1|/6e-48/LRR receptor-like protein kinase m4 [Malus x domestica]
Unigene14806_Taxus	63	2	19.98	0.6	-5.05745	8.37758e-18	1.74967e-16	-	-	-	-
Unigene32887_Taxus	863	29	273.66	8.64	-4.98521	2.64674e-226	1.5665e-224	-	-	-	gi|17483758|gb|AAL40191.1|AF337174_1/2e-37/endo-1,3-beta-glucanase [Oryza sativa]
Unigene35696_Taxus	201	7	63.74	2.09	-4.93062	1.61635e-53	6.60442e-52	-	-	-	gi|115450803|ref|NP_001049002.1|/1e-26/Os03g0154100 [Oryza sativa (japonica cultivar-group)] >gi|108706247|gb|ABF94042.1| FAD binding domain containing protein, expressed [Oryza sativa (japonica cultivar-group)] >gi|113547473|dbj|BAF10916.1| Os03g0154100 [Oryza sativa Japonica Group]
Unigene2952_Taxus	56	2	17.76	0.6	-4.88753	1.07146e-15	1.99458e-14	-	-	-	-
Unigene3747_Taxus	83	3	26.32	0.89	-4.88621	1.08502e-22	2.75743e-21	-	-	-	-
Unigene32381_Taxus	442	16	140.16	4.77	-4.87694	2.59952e-115	1.39911e-113	-	-	-	gi|115462729|ref|NP_001054964.1|/2e-39/Os05g0226800 [Oryza sativa (japonica cultivar-group)]
Unigene29880_Taxus	55	2	17.44	0.6	-4.86129	2.13814e-15	3.9269e-14	GO:0016023//cytoplasmic membrane-bounded vesicle	-	-	gi|21726980|emb|CAD38276.1|/8e-22/pathogenesis related protein isoform b1 [Solanum phureja]
Unigene18276_Taxus	771	29	244.49	8.64	-4.8226	9.8271e-199	5.68408e-197	-	-	-	gi|84514145|gb|ABC59081.1|/3e-83/cytochrome P450 monooxygenase CYP92A29 [Medicago truncatula]
Unigene15347_Taxus	1400	53	443.95	15.79	-4.81331	0	0	-	-	-	gi|60677683|dbj|BAD90973.1|/1e-77/cytochrome P450 [Oryza sativa Japonica Group]
Unigene15105_Taxus	976	38	309.5	11.32	-4.77299	1.14451e-249	6.86512e-248	-	-	-	gi|195615558|gb|ACG29609.1|/3e-91/peptide transporter PTR2 [Zea mays]
Unigene33357_Taxus	200	8	63.42	2.38	-4.7359	4.3656e-52	1.76356e-50	GO:0016021//integral to membrane	GO:0005215//transporter activity	GO:0006810//transport	gi|1212915|emb|CAA65186.1|/4e-74/aquaporin [Helianthus annuus]
Unigene7276_Taxus	74	3	23.47	0.89	-4.72087	5.32382e-20	1.23174e-18	-	-	-	gi|115484411|ref|NP_001065867.1|/3e-18/Os11g0172100 [Oryza sativa (japonica cultivar-group)]
Unigene30992_Taxus	49	2	15.54	0.6	-4.69488	1.33266e-13	1.99844e-12	-	-	-	gi|3451071|emb|CAA20467.1|/3e-07/beta adaptin-like protein [Arabidopsis thaliana] >gi|7269194|emb|CAB79301.1| beta adaptin-like protein [Arabidopsis thaliana]
Unigene20535_Taxus	754	31	239.1	9.24	-4.69358	2.07332e-191	1.18385e-189	GO:0005634//nucleus	GO:0043565//sequence-specific DNA binding;GO:0046983//protein dimerization activity;GO:0003700//sequence-specific DNA binding transcription factor activity	GO:0006355//regulation of transcription, DNA-dependent	gi|113367190|gb|ABI34652.1|/2e-17/bZIP transcription factor bZIP73B [Glycine max]
Unigene17441_Taxus	119	5	37.74	1.49	-4.66271	2.98636e-31	9.33368e-30	-	-	-	gi|112807100|dbj|BAF03162.1|/3e-73/deoxymugineic acid synthase1 [Hordeum vulgare]
Unigene10914_Taxus	4625	195	1466.62	58.1	-4.65781	0	0	-	-	-	-
Unigene30205_Taxus	47	2	14.9	0.6	-4.63421	5.25464e-13	7.26797e-12	-	-	-	gi|224087702|ref|XP_002308209.1|/3e-34/laccase 1d [Populus trichocarpa] >gi|222854185|gb|EEE91732.1| laccase 1d [Populus trichocarpa]
Unigene17208_Taxus	46	2	14.59	0.6	-4.60387	1.0422e-12	1.40126e-11	-	-	-	-
Unigene9602_Taxus	68	3	21.56	0.89	-4.59841	3.24074e-18	6.91423e-17	-	-	-	-
Unigene35703_Taxus	90	4	28.54	1.19	-4.58395	1.05995e-23	2.78101e-22	-	-	-	gi|9665130|gb|AAF97314.1|AC007843_17/5e-48/Unknown protein [Arabidopsis thaliana]
Unigene20719_Taxus	86	4	27.27	1.19	-4.51828	1.61919e-22	4.10326e-21	-	-	-	gi|115447557|ref|NP_001047558.1|/7e-09/Os02g0643000 [Oryza sativa (japonica cultivar-group)] >gi|113537089|dbj|BAF09472.1| Os02g0643000 [Oryza sativa Japonica Group]
Unigene21579_Taxus	236	11	74.84	3.28	-4.51204	1.5514e-59	6.65981e-58	-	-	-	-
Unigene34759_Taxus	43	2	13.64	0.6	-4.50674	8.09058e-12	9.79835e-11	-	-	-	gi|52076655|dbj|BAD45555.1|/5e-06/armadillo/beta-catenin repeat protein-like [Oryza sativa Japonica Group] >gi|255677333|dbj|BAH93690.1| Os06g0683950 [Oryza sativa Japonica Group]
Unigene301_Taxus	84	4	26.64	1.19	-4.48456	6.3103e-22	1.56353e-20	-	-	-	-
Unigene2473_Taxus	1108	53	351.35	15.79	-4.47583	1.88051e-272	1.14339e-270	-	-	-	gi|40253310|dbj|BAD05244.1|/5e-07/Endo-1,3;1,4-beta-D-glucanase precursor-like protein [Oryza sativa Japonica Group]
Unigene19945_Taxus	42	2	13.32	0.6	-4.47249	1.5991e-11	1.88912e-10	-	-	-	gi|226498282|ref|NP_001148036.1|/7e-13/EARLY flowering 4 protein [Zea mays] >gi|195615426|gb|ACG29543.1| EARLY flowering 4 protein [Zea mays]
Unigene34149_Taxus	61	3	19.34	0.89	-4.44164	3.80958e-16	7.25082e-15	-	-	-	gi|166343839|gb|ABY86662.1|/1e-127/beta-tubulin 16 [Gossypium hirsutum]
Unigene35035_Taxus	41	2	13	0.6	-4.43741	3.15754e-11	3.63148e-10	-	-	-	gi|74661116|sp|Q6FM32.1|KAD1_CANGA/1e-22/RecName: Full=Adenylate kinase 1; Short=AK 1; AltName: Full=ATP-AMP transphosphorylase 1; AltName: Full=Adenylate kinase cytosolic and mitochondrial
Unigene1530_Taxus	976	48	309.5	14.3	-4.43585	7.92054e-239	4.70348e-237	-	-	-	gi|68491823|ref|XP_710298.1|/1e-17/potential oxidoreductase [Candida albicans SC5314] >gi|46431477|gb|EAK91034.1| potential oxidoreductase [Candida albicans SC5314]
Unigene22307_Taxus	242	12	76.74	3.58	-4.42195	2.88044e-60	1.24249e-58	-	-	-	-
Unigene17579_Taxus	704	35	223.24	10.43	-4.41978	2.40078e-172	1.36645e-170	-	-	-	gi|18403901|ref|NP_566740.1|/3e-15/RALFL24 (ralf-like 24); signal transducer [Arabidopsis thaliana]
Unigene15106_Taxus	100	5	31.71	1.49	-4.41155	1.24432e-25	3.43684e-24	-	-	-	-
Unigene28859_Taxus	40	2	12.68	0.6	-4.40145	6.22852e-11	6.89199e-10	-	-	-	gi|288559156|sp|C5XEK4.1|U4974_SORBI/5e-06/RecName: Full=UPF0497 membrane protein Sb03g029220
Unigene4620_Taxus	40	2	12.68	0.6	-4.40145	6.22852e-11	6.88771e-10	-	-	-	gi|3023956|sp|Q00808.1|HETE1_PODAN/4e-09/RecName: Full=Vegetative incompatibility protein HET-E-1 >gi|607003|gb|AAA85775.1| beta transducin-like protein [Podospora anserina]
Unigene22102_Taxus	79	4	25.05	1.19	-4.39578	1.87481e-20	4.38316e-19	GO:0016020//membrane	-	-	gi|15232435|ref|NP_190982.1|/4e-09/PTR1 (PEPTIDE TRANSPORTER 1); dipeptide transporter/ transporter/ tripeptide transporter [Arabidopsis thaliana] >gi|75311821|sp|Q9M390.1|PTR1_ARATH RecName: Full=Peptide transporter PTR1 >gi|6822060|emb|CAB70988.1| peptide transport-like protein [Arabidopsis thaliana] >gi|21537000|gb|AAM61341.1| peptide transport-like protein [Arabidopsis thaliana]
Unigene6880_Taxus	38	2	12.05	0.6	-4.32793	2.41578e-10	2.51238e-09	-	-	-	gi|15218463|ref|NP_174661.1|/7e-44/MES14 (METHYL ESTERASE 14); hydrolase [Arabidopsis thaliana] >gi|75334384|sp|Q9FVW3.1|Y1399_ARATH RecName: Full=Probable esterase At1g33990 >gi|15983466|gb|AAL11601.1|AF424607_1 At1g33990/F12G12_220 [Arabidopsis thaliana] >gi|94442411|gb|ABF18993.1| At1g33990 [Arabidopsis thaliana]
Unigene11608_Taxus	38	2	12.05	0.6	-4.32793	2.41578e-10	2.51092e-09	-	-	-	gi|15231175|ref|NP_190797.1|/4e-09/IQD3 (IQ-domain 3); calmodulin binding [Arabidopsis thaliana]
Unigene16969_Taxus	302	16	95.77	4.77	-4.32751	8.18044e-74	3.89665e-72	-	-	-	gi|58618138|gb|AAW80635.1|/0.0/phenylalanine ammonia lyase [Huperzia lucidula]
Unigene33652_Taxus	226	12	71.67	3.58	-4.32334	1.4193e-55	5.85296e-54	-	-	-	-
Unigene14153_Taxus	75	4	23.78	1.19	-4.32072	2.79788e-19	6.25398e-18	-	-	-	gi|225346675|gb|ACN86359.1|/1e-14/GID1-4 [Gossypium hirsutum]
Unigene32643_Taxus	599	32	189.95	9.53	-4.317	1.25846e-144	7.02806e-143	-	-	-	gi|115469130|ref|NP_001058164.1|/3e-16/Os06g0640500 [Oryza sativa (japonica cultivar-group)] >gi|113596204|dbj|BAF20078.1| Os06g0640500 [Oryza sativa Japonica Group]
Unigene17913_Taxus	112	6	35.52	1.79	-4.3106	3.6803e-28	1.07659e-26	-	-	-	gi|22759895|dbj|BAC10994.1|/8e-36/rhamnosyl transferase [Nierembergia sp. NB17]
Unigene24711_Taxus	37	2	11.73	0.6	-4.2891	4.74952e-10	4.79936e-09	-	-	-	-
Unigene2373_Taxus	37	2	11.73	0.6	-4.2891	4.74952e-10	4.79664e-09	GO:0005737//cytoplasm	GO:0030955//potassium ion binding;GO:0005524//ATP binding;GO:0004478//methionine adenosyltransferase activity;GO:0030145//manganese ion binding;GO:0050897//cobalt ion binding;GO:0000287//magnesium ion binding	GO:0006730//one-carbon metabolic process	gi|1709002|sp|P50300.1|METK_PINBN/0.0/RecName: Full=S-adenosylmethionine synthetase; Short=AdoMet synthetase; AltName: Full=Methionine adenosyltransferase; Short=MAT >gi|1033190|gb|AAA79831.1| S-adenosyl methionine synthetase [Pinus banksiana]
Unigene6421_Taxus	293	16	92.91	4.77	-4.28377	3.48974e-71	1.63175e-69	-	-	-	gi|157812609|gb|ABV80344.1|/1e-33/cytochrome P450-dependent monooxygenase [Selaginella moellendorffii]
Unigene13869_Taxus	54	3	17.12	0.89	-4.26573	4.32432e-14	7.08719e-13	-	-	-	-
Unigene1743_Taxus	36	2	11.42	0.6	-4.25046	9.32632e-10	9.08908e-09	-	-	-	-
Unigene21505_Taxus	36	2	11.42	0.6	-4.25046	9.32632e-10	9.08411e-09	-	-	-	gi|115445925|ref|NP_001046742.1|/8e-24/Os02g0439200 [Oryza sativa (japonica cultivar-group)] >gi|46805820|dbj|BAD17170.1| Cingulin-like [Oryza sativa Japonica Group] >gi|113536273|dbj|BAF08656.1| Os02g0439200 [Oryza sativa Japonica Group]
Unigene29147_Taxus	71	4	22.51	1.19	-4.24153	4.13332e-18	8.77653e-17	-	-	-	gi|2230959|emb|CAA71234.1|/2e-14/subtilisin-like protease [Solanum lycopersicum] >gi|4200336|emb|CAA76725.1| P69B protein [Solanum lycopersicum]
Unigene35558_Taxus	52	3	16.49	0.89	-4.21164	1.65871e-13	2.46455e-12	-	-	-	gi|226499476|ref|NP_001149720.1|/5e-11/hybrid proline-rich protein1 [Zea mays] >gi|433707|emb|CAA42959.1| prolin rich protein [Zea mays] >gi|195629756|gb|ACG36519.1| 36.4 kDa proline-rich protein [Zea mays]
Unigene31932_Taxus	52	3	16.49	0.89	-4.21164	1.65871e-13	2.4625e-12	-	-	-	gi|133907524|gb|ABO42262.1|/5e-25/AT-hook DNA-binding protein [Gossypium hirsutum]
Unigene35493_Taxus	35	2	11.1	0.6	-4.20945	1.82901e-09	1.71493e-08	-	-	-	gi|115440543|ref|NP_001044551.1|/9e-91/Os01g0803300 [Oryza sativa (japonica cultivar-group)] >gi|113534082|dbj|BAF06465.1| Os01g0803300 [Oryza sativa Japonica Group]
Unigene13249_Taxus	207	12	65.64	3.58	-4.19654	4.92812e-50	1.96408e-48	-	-	-	gi|156145680|gb|ABU53653.1|/1e-40/caffeic acid O-3-methyltransferase [Populus deltoides]
Unigene24919_Taxus	256	15	81.18	4.47	-4.18278	2.1902e-61	9.51669e-60	-	-	-	-
Unigene18674_Taxus	135	8	42.81	2.38	-4.16891	6.1366e-33	1.9877e-31	-	-	-	gi|226495369|ref|NP_001147768.1|/7e-12/LOC100281378 [Zea mays] >gi|195613630|gb|ACG28645.1| epoxide hydrolase 2 [Zea mays]
Unigene5595_Taxus	34	2	10.78	0.6	-4.16725	3.58206e-09	3.25086e-08	-	-	-	gi|227069387|gb|ACP19073.1|/0.0/actin 2 [Picea abies]
Unigene9360_Taxus	34	2	10.78	0.6	-4.16725	3.58206e-09	3.24921e-08	-	-	-	gi|38344829|emb|CAD40873.2|/1e-50/OSJNBa0064H22.10 [Oryza sativa (japonica cultivar-group)] >gi|116310063|emb|CAH67084.1| H0818E04.1 [Oryza sativa (indica cultivar-group)] >gi|116310186|emb|CAH67198.1| OSIGBa0152K17.10 [Oryza sativa (indica cultivar-group)]
Unigene24607_Taxus	371	22	117.65	6.55	-4.16686	4.8499e-88	2.45457e-86	-	-	-	gi|42569882|ref|NP_181827.2|/2e-09/GDSL-motif lipase/hydrolase family protein [Arabidopsis thaliana] >gi|75116667|sp|Q67ZI9.1|GDL48_ARATH RecName: Full=GDSL esterase/lipase At2g42990; AltName: Full=Extracellular lipase At2g42990; Flags: Precursor
Unigene34161_Taxus	116	7	36.78	2.09	-4.13735	2.2814e-28	6.70679e-27	-	-	-	gi|15232058|ref|NP_186768.1|/7e-56/peroxidase 27 (PER27) (P27) (PRXR7) [Arabidopsis thaliana] >gi|25453197|sp|Q43735.1|PER27_ARATH RecName: Full=Peroxidase 27; Short=Atperox P27; AltName: Full=PRXR7; AltName: Full=ATP12a; Flags: Precursor >gi|1402916|emb|CAA66963.1| peroxidase [Arabidopsis thaliana] >gi|1429217|emb|CAA67311.1| peroxidase ATP12a [Arabidopsis thaliana]
Unigene28479_Taxus	66	4	20.93	1.19	-4.13654	1.17819e-16	2.32183e-15	-	-	-	-
Unigene11275_Taxus	66	4	20.93	1.19	-4.13654	1.17819e-16	2.31927e-15	-	-	-	-
Unigene12633_Taxus	49	3	15.54	0.89	-4.12604	1.23708e-12	1.64959e-11	-	-	-	gi|116787519|gb|ABK24539.1|/9e-07/unknown [Picea sitchensis]
Unigene31925_Taxus	33	2	10.46	0.6	-4.12378	7.00542e-09	6.13577e-08	-	-	-	gi|115452815|ref|NP_001050008.1|/2e-67/Os03g0330200 [Oryza sativa (japonica cultivar-group)]
Unigene23341_Taxus	33	2	10.46	0.6	-4.12378	7.00542e-09	6.13275e-08	-	-	-	gi|224090683|ref|XP_002309057.1|/4e-10/cytochrome P450 [Populus trichocarpa] >gi|222855033|gb|EEE92580.1| cytochrome P450 [Populus trichocarpa]
Unigene13182_Taxus	293	18	92.91	5.36	-4.11553	2.9615e-69	1.36682e-67	-	-	-	gi|264668235|gb|ACY71502.1|/5e-29/AGL6-like MADS box transcription factor [Lilium tigrinum]
Unigene17235_Taxus	340	21	107.82	6.26	-4.10632	5.12694e-80	2.52311e-78	-	-	-	gi|255674367|dbj|BAF11468.2|/2e-79/Os03g0248200 [Oryza sativa Japonica Group]
Unigene30422_Taxus	177	11	56.13	3.28	-4.097	2.75914e-42	1.00726e-40	-	-	-	gi|18396367|ref|NP_566186.1|/2e-10/GASA5 (GAST1 PROTEIN HOMOLOG 5) [Arabidopsis thaliana]
Unigene27317_Taxus	48	3	15.22	0.89	-4.09602	2.41194e-12	3.0824e-11	-	-	-	gi|54299381|ref|NP_983895.2|/2e-15/ADL201Wp [Ashbya gossypii ATCC 10895] >gi|51701471|sp|Q757K0.3|H41_ASHGO RecName: Full=Histone H4.1 >gi|51890953|gb|AAS51719.2| ADL201Wp [Ashbya gossypii ATCC 10895]
Unigene783_Taxus	48	3	15.22	0.89	-4.09602	2.41194e-12	3.08019e-11	-	-	-	-
Unigene16978_Taxus	32	2	10.15	0.6	-4.08037	1.36799e-08	1.1572e-07	-	-	-	gi|84514145|gb|ABC59081.1|/2e-12/cytochrome P450 monooxygenase CYP92A29 [Medicago truncatula]
Unigene13401_Taxus	32	2	10.15	0.6	-4.08037	1.36799e-08	1.15665e-07	-	-	-	gi|195642342|gb|ACG40639.1|/7e-06/seed specific protein Bn15D14A [Zea mays]
Unigene33417_Taxus	47	3	14.9	0.89	-4.06536	4.69738e-12	5.82351e-11	-	-	-	gi|2493318|sp|Q41001.1|BCP_PEA/3e-11/RecName: Full=Blue copper protein; Flags: Precursor >gi|562779|emb|CAA80963.1| blue copper protein [Pisum sativum] >gi|1098264|prf||2115352A blue Cu protein
Unigene9927_Taxus	47	3	14.9	0.89	-4.06536	4.69738e-12	5.81946e-11	-	-	-	gi|115451913|ref|NP_001049557.1|/1e-40/Os03g0249100 [Oryza sativa (japonica cultivar-group)] >gi|108707178|gb|ABF94973.1| expressed protein [Oryza sativa (japonica cultivar-group)] >gi|113548028|dbj|BAF11471.1| Os03g0249100 [Oryza sativa Japonica Group]
Unigene33274_Taxus	92	6	29.17	1.79	-4.02645	2.37396e-22	5.97346e-21	-	-	-	gi|255935305|ref|XP_002558679.1|/1e-05/Pc13g02380 [Penicillium chrysogenum Wisconsin 54-1255] >gi|211583299|emb|CAP91307.1| Pc13g02380 [Penicillium chrysogenum Wisconsin 54-1255]
Unigene33479_Taxus	121	8	38.37	2.38	-4.01095	6.80782e-29	2.04522e-27	-	-	-	gi|115478595|ref|NP_001062891.1|/2e-08/Os09g0327500 [Oryza sativa (japonica cultivar-group)] >gi|113631124|dbj|BAF24805.1| Os09g0327500 [Oryza sativa Japonica Group]
Unigene3808_Taxus	1635	108	518.47	32.18	-4.01002	0	0	-	-	-	-
Unigene16815_Taxus	211	14	66.91	4.17	-4.0041	2.5366e-49	9.99768e-48	-	-	-	gi|261204936|ref|XP_002627205.1|/5e-28/manganese ion homeostasis [Ajellomyces dermatitidis SLH14081] >gi|239592264|gb|EEQ74845.1| manganese ion homeostasis [Ajellomyces dermatitidis SLH14081]
Unigene34362_Taxus	60	4	19.03	1.19	-3.99924	6.38916e-15	1.12808e-13	-	-	-	gi|31433494|gb|AAP54999.1|/5e-38/oxidoreductase, 2OG-Fe oxygenase family protein, expressed [Oryza sativa (japonica cultivar-group)]
Unigene9991_Taxus	30	2	9.51	0.6	-3.98641	5.19124e-08	4.10119e-07	-	-	-	-
Unigene18499_Taxus	30	2	9.51	0.6	-3.98641	5.19124e-08	4.09938e-07	-	-	-	gi|115448025|ref|NP_001047792.1|/2e-19/Os02g0690600 [Oryza sativa (japonica cultivar-group)] >gi|113537323|dbj|BAF09706.1| Os02g0690600 [Oryza sativa Japonica Group]
Unigene17703_Taxus	59	4	18.71	1.19	-3.97478	1.23906e-14	2.11233e-13	-	-	-	gi|115482808|ref|NP_001064997.1|/1e-72/Os10g0503300 [Oryza sativa (japonica cultivar-group)] >gi|113639606|dbj|BAF26911.1| Os10g0503300 [Oryza sativa Japonica Group]
Unigene1768_Taxus	44	3	13.95	0.89	-3.97032	3.4454e-11	3.94979e-10	-	-	-	gi|121706354|ref|XP_001271440.1|/8e-18/taurine catabolism dioxygenase TauD, TfdA family protein [Aspergillus clavatus NRRL 1] >gi|119399586|gb|EAW10014.1| taurine catabolism dioxygenase TauD, TfdA family protein [Aspergillus clavatus NRRL 1]
Unigene34148_Taxus	44	3	13.95	0.89	-3.97032	3.4454e-11	3.94725e-10	-	-	-	gi|115464635|ref|NP_001055917.1|/7e-23/Os05g0493100 [Oryza sativa (japonica cultivar-group)] >gi|113579468|dbj|BAF17831.1| Os05g0493100 [Oryza sativa Japonica Group]
Unigene6805_Taxus	190	13	60.25	3.87	-3.96056	3.35788e-44	1.27008e-42	-	-	-	gi|74475192|gb|ABA07807.1|/2e-35/cytochrome P450 monooxygenase CYP82E3 [Nicotiana tabacum]
Unigene19975_Taxus	58	4	18.39	1.19	-3.94989	2.40056e-14	4.02314e-13	-	-	-	gi|15225947|ref|NP_182148.1|/1e-22/myosin heavy chain-related [Arabidopsis thaliana] >gi|19310383|gb|AAL84931.1| At2g46250/T3F17.10 [Arabidopsis thaliana]
Unigene1659_Taxus	87	6	27.59	1.79	-3.94611	6.4902e-21	1.54164e-19	-	-	-	gi|114793221|gb|ABI78960.1|/4e-57/cellulose synthase 7 [Physcomitrella patens]
Unigene6940_Taxus	130	9	41.22	2.68	-3.94304	1.39423e-30	4.29726e-29	-	-	-	gi|15229656|ref|NP_188478.1|/7e-32/aspartyl protease family protein [Arabidopsis thaliana] >gi|11994113|dbj|BAB01116.1| CND41, chloroplast nucleoid DNA binding protein-like [Arabidopsis thaliana]
Unigene35278_Taxus	187	13	59.3	3.87	-3.93763	2.42474e-43	9.05592e-42	-	-	-	gi|121145|sp|P80042.1|GGPPS_CAPAN/1e-113/RecName: Full=Geranylgeranyl pyrophosphate synthase, chloroplastic; Short=GGPP synthase; Short=GGPS; Includes: RecName: Full=Dimethylallyltranstransferase; Includes: RecName: Full=Geranyltranstransferase; Includes: RecName: Full=Farnesyltranstransferase; Flags: Precursor >gi|643094|emb|CAA56554.1| geranylgeranyl diphosphate synthase [Capsicum annuum]
Unigene35193_Taxus	143	10	45.35	2.98	-3.92772	2.03802e-33	6.67414e-32	-	-	-	gi|240107084|gb|EER25271.1|/4e-06/FAD binding domain containing protein [Coccidioides posadasii C735 delta SOWgp]
Unigene5261_Taxus	100	7	31.71	2.09	-3.92336	9.27842e-24	2.44158e-22	-	-	-	-
Unigene11796_Taxus	128	9	40.59	2.68	-3.92082	5.20514e-30	1.58512e-28	GO:0016023//cytoplasmic membrane-bounded vesicle	-	-	gi|115466930|ref|NP_001057064.1|/9e-27/Os06g0199000 [Oryza sativa (japonica cultivar-group)] >gi|113595104|dbj|BAF18978.1| Os06g0199000 [Oryza sativa Japonica Group]
Unigene3224_Taxus	99	7	31.39	2.09	-3.90873	1.79247e-23	4.64815e-22	-	-	-	gi|207347969|gb|EDZ73967.1|/1e-14/YAR007Cp-like protein [Saccharomyces cerevisiae AWRI1631] >gi|256270812|gb|EEU05961.1| Rfa1p [Saccharomyces cerevisiae JAY291] >gi|259144715|emb|CAY77656.1| Rfa1p [Saccharomyces cerevisiae EC1118]
Unigene11961_Taxus	42	3	13.32	0.89	-3.90364	1.29233e-10	1.38358e-09	-	-	-	gi|226531952|ref|NP_001149536.1|/9e-06/src2-like protein [Zea mays] >gi|195627870|gb|ACG35765.1| src2-like protein [Zea mays]
Unigene34606_Taxus	42	3	13.32	0.89	-3.90364	1.29233e-10	1.38275e-09	-	-	-	gi|13940602|gb|AAK50404.1|AC021891_5/2e-20/Putative O-succinylhomoserine (thiol)-lyase (cystathionine gamma synthase) [Oryza sativa Japonica Group]
Unigene4343_Taxus	42	3	13.32	0.89	-3.90364	1.29233e-10	1.38192e-09	-	-	-	-
Unigene10908_Taxus	28	2	8.88	0.6	-3.88753	1.95596e-07	1.41706e-06	-	-	-	gi|108707411|gb|ABF95206.1|/6e-33/expressed protein [Oryza sativa (japonica cultivar-group)]
Unigene34818_Taxus	28	2	8.88	0.6	-3.88753	1.95596e-07	1.41648e-06	-	-	-	gi|226504216|ref|NP_001149541.1|/8e-06/ZIM motif family protein [Zea mays] >gi|195627894|gb|ACG35777.1| ZIM motif family protein [Zea mays]
Unigene25108_Taxus	28	2	8.88	0.6	-3.88753	1.95596e-07	1.4159e-06	-	-	-	gi|226493748|ref|NP_001148009.1|/2e-06/cationic amino acid transporter 4 [Zea mays] >gi|195615096|gb|ACG29378.1| cationic amino acid transporter 4 [Zea mays]
Unigene31496_Taxus	28	2	8.88	0.6	-3.88753	1.95596e-07	1.41533e-06	-	-	-	gi|115480639|ref|NP_001063913.1|/8e-11/Os09g0558800 [Oryza sativa (japonica cultivar-group)] >gi|113632146|dbj|BAF25827.1| Os09g0558800 [Oryza sativa Japonica Group]
Unigene8465_Taxus	28	2	8.88	0.6	-3.88753	1.95596e-07	1.41475e-06	-	-	-	gi|116062014|dbj|BAF34635.1|/2e-70/DNA methyltransferase 1a [Brassica rapa]
Unigene6760_Taxus	28	2	8.88	0.6	-3.88753	1.95596e-07	1.41418e-06	-	-	-	gi|219522339|gb|ACL14489.1|/2e-75/S-adenosylmethionine decarboxylase [Cicer arietinum] >gi|219522341|gb|ACL14490.1| S-adenosylmethionine decarboxylase [Cicer arietinum]
Unigene35795_Taxus	263	19	83.4	5.66	-3.88117	9.80044e-60	4.21727e-58	-	-	-	gi|15239525|ref|NP_200212.1|/3e-48/glycosyltransferase family protein [Arabidopsis thaliana] >gi|10177263|dbj|BAB10731.1| flavonol 3-O-glucosyltransferase-like protein [Arabidopsis thaliana] >gi|56236076|gb|AAV84494.1| At5g54010 [Arabidopsis thaliana] >gi|56790204|gb|AAW30019.1| At5g54010 [Arabidopsis thaliana]
Unigene10959_Taxus	83	6	26.32	1.79	-3.87813	9.04152e-20	2.07303e-18	-	-	-	gi|122201872|sp|Q2MY37.1|PAT14_SOLTU/4e-11/RecName: Full=Patatin-14; Flags: Precursor >gi|84316417|gb|ABC55701.1| patatin protein 14 [Solanum tuberosum]
Unigene14314_Taxus	1196	87	379.26	25.92	-3.87105	2.1211e-265	1.28529e-263	-	-	-	gi|115455157|ref|NP_001051179.1|/3e-09/Os03g0734300 [Oryza sativa (japonica cultivar-group)] >gi|108710930|gb|ABF98725.1| type II proteinase inhibitor family protein, expressed [Oryza sativa (japonica cultivar-group)] >gi|113549650|dbj|BAF13093.1| Os03g0734300 [Oryza sativa Japonica Group]
Unigene146_Taxus	206	15	65.32	4.47	-3.86918	5.28912e-47	2.04394e-45	-	-	-	gi|260408334|gb|ACX37460.1|/3e-66/calcium dependent protein kinase 32 [Gossypium hirsutum]
Unigene17153_Taxus	41	3	13	0.89	-3.86856	2.49764e-10	2.59449e-09	-	-	-	gi|50545145|ref|XP_500110.1|/1e-112/YALI0A15950p [Yarrowia lipolytica] >gi|49645975|emb|CAG84041.1| YALI0A15950p [Yarrowia lipolytica]
Unigene32824_Taxus	41	3	13	0.89	-3.86856	2.49764e-10	2.59298e-09	-	-	-	gi|115479519|ref|NP_001063353.1|/7e-31/Os09g0454600 [Oryza sativa (japonica cultivar-group)] >gi|113631586|dbj|BAF25267.1| Os09g0454600 [Oryza sativa Japonica Group]
Unigene33756_Taxus	151	11	47.88	3.28	-3.86766	7.97536e-35	2.65572e-33	-	-	-	gi|255932297|ref|XP_002557705.1|/1e-17/Pc12g08750 [Penicillium chrysogenum Wisconsin 54-1255] >gi|211582324|emb|CAP80502.1| Pc12g08750 [Penicillium chrysogenum Wisconsin 54-1255]
Unigene28943_Taxus	123	9	39	2.68	-3.86317	1.38955e-28	4.10527e-27	-	-	-	gi|224142027|ref|XP_002324361.1|/6e-06/glutamate-gated kainate-type ion channel receptor subunit GluR5 [Populus trichocarpa] >gi|222865795|gb|EEF02926.1| glutamate-gated kainate-type ion channel receptor subunit GluR5 [Populus trichocarpa]
Unigene14134_Taxus	177	13	56.13	3.87	-3.85837	1.72537e-40	6.20957e-39	-	-	-	-
Unigene21283_Taxus	68	5	21.56	1.49	-3.85497	2.39274e-16	4.62328e-15	-	-	-	gi|11932092|emb|CAC19184.1|/1e-112/alpha-expansin [Cicer arietinum]
Unigene30897_Taxus	68	5	21.56	1.49	-3.85497	2.39274e-16	4.61827e-15	-	-	-	-
Unigene8216_Taxus	271	20	85.94	5.96	-3.84995	3.87118e-61	1.67798e-59	-	-	-	gi|8698744|gb|AAF78502.1|AC012187_22/7e-45/Contains similarity to CYR1 from Candida albicans gb|AB034965 and contains multiple Leucine Rich PF|00560 repeats [Arabidopsis thaliana]
Unigene12035_Taxus	135	10	42.81	2.98	-3.84456	3.89324e-31	1.21255e-29	GO:0044464//cell part	GO:0004497//monooxygenase activity;GO:0005506//iron ion binding	GO:0016132//brassinosteroid biosynthetic process;GO:0048366//leaf development	gi|195614806|gb|ACG29233.1|/2e-69/cytochrome P450 CYP90B14v2 [Zea mays]
Unigene22303_Taxus	81	6	25.69	1.79	-3.84318	3.35946e-19	7.47176e-18	-	-	-	-
Unigene19618_Taxus	188	14	59.62	4.17	-3.83768	9.43128e-43	3.47864e-41	-	-	-	gi|220938744|emb|CAR78982.1|/0.0/phosphoenolpyruvate carboxykinase [Sporobolus africanus]
Unigene7808_Taxus	27	2	8.56	0.6	-3.83458	3.78546e-07	2.61387e-06	-	-	-	-
Unigene1890_Taxus	27	2	8.56	0.6	-3.83458	3.78546e-07	2.61286e-06	-	-	-	gi|30694120|ref|NP_191039.2|/1e-26/armadillo/beta-catenin repeat family protein / U-box domain-containing protein [Arabidopsis thaliana] >gi|172045742|sp|Q8GWV5.2|PUB3_ARATH RecName: Full=U-box domain-containing protein 3; AltName: Full=Plant U-box protein 3
Unigene16475_Taxus	80	6	25.37	1.79	-3.82509	6.4679e-19	1.42078e-17	-	-	-	gi|254771941|gb|ACT82248.1|/3e-31/alcohol acyltransferase [Vasconcellea cundinamarcensis]
Unigene15797_Taxus	306	23	97.03	6.85	-3.82425	1.76961e-68	8.08348e-67	-	-	-	gi|88771131|gb|ABD52115.1|/4e-17/dirigent-like protein pDIR4 [Picea engelmannii x Picea glauca]
Unigene24726_Taxus	39	3	12.37	0.89	-3.7969	9.2873e-10	9.07588e-09	-	-	-	gi|224067894|ref|XP_002302586.1|/2e-06/2-oxoglutarate-dependent dioxygenase [Populus trichocarpa] >gi|222844312|gb|EEE81859.1| 2-oxoglutarate-dependent dioxygenase [Populus trichocarpa]
Unigene21730_Taxus	39	3	12.37	0.89	-3.7969	9.2873e-10	9.0709e-09	GO:0016023//cytoplasmic membrane-bounded vesicle;GO:0005634//nucleus	-	GO:0006333//chromatin assembly or disassembly	gi|74608690|sp|Q6FL84.1|ASF1_CANGA/4e-18/RecName: Full=Histone chaperone ASF1; AltName: Full=Anti-silencing function protein 1
Unigene28326_Taxus	39	3	12.37	0.89	-3.7969	9.2873e-10	9.06593e-09	-	-	-	gi|34485633|gb|AAQ73203.1|/2e-42/SAT5 [Pisum sativum]
Unigene2862_Taxus	195	15	61.84	4.47	-3.79019	7.00708e-44	2.63914e-42	-	-	-	gi|115457788|ref|NP_001052494.1|/5e-06/Os04g0338000 [Oryza sativa (japonica cultivar-group)] >gi|38344997|emb|CAE01603.2| OSJNBa0008A08.11 [Oryza sativa (japonica cultivar-group)] >gi|38345350|emb|CAE03308.2| OSJNBa0032I19.2 [Oryza sativa (japonica cultivar-group)] >gi|113564065|dbj|BAF14408.1| Os04g0338000 [Oryza sativa Japonica Group]
Unigene13248_Taxus	130	10	41.22	2.98	-3.78996	1.02127e-29	3.09949e-28	-	-	-	gi|115451103|ref|NP_001049152.1|/1e-34/Os03g0178400 [Oryza sativa (japonica cultivar-group)] >gi|27436746|gb|AAO13465.1| Unknown protein [Oryza sativa Japonica Group] >gi|108706488|gb|ABF94283.1| hydrolase, alpha/beta fold family protein, expressed [Oryza sativa (japonica cultivar-group)] >gi|113547623|dbj|BAF11066.1| Os03g0178400 [Oryza sativa Japonica Group]
Unigene18759_Taxus	26	2	8.24	0.6	-3.77961	7.31044e-07	4.82354e-06	-	-	-	gi|255679315|dbj|BAH94819.1|/5e-08/Os10g0339600 [Oryza sativa Japonica Group]
Unigene16643_Taxus	26	2	8.24	0.6	-3.77961	7.31044e-07	4.82175e-06	-	-	-	gi|224125042|ref|XP_002319488.1|/6e-07/predicted protein [Populus trichocarpa] >gi|222857864|gb|EEE95411.1| predicted protein [Populus trichocarpa]
Unigene11020_Taxus	26	2	8.24	0.6	-3.77961	7.31044e-07	4.81997e-06	-	GO:0009055//electron carrier activity;GO:0020037//heme binding;GO:0050597;GO:0050598	GO:0042617;GO:0055114//oxidation reduction	gi|224118706|ref|XP_002331427.1|/2e-27/cytochrome P450 [Populus trichocarpa] >gi|222873641|gb|EEF10772.1| cytochrome P450 [Populus trichocarpa]
Unigene9563_Taxus	116	9	36.78	2.68	-3.77862	1.34919e-26	3.82735e-25	-	-	-	gi|84310212|gb|ABC55266.1|/2e-32/acid alpha galactosidase 1 [Cucumis sativus]
Unigene801_Taxus	64	5	20.29	1.49	-3.76738	3.27882e-15	5.92416e-14	GO:0005694//chromosome	-	-	gi|159464884|ref|XP_001690671.1|/2e-27/histone H3 [Chlamydomonas reinhardtii] >gi|159464908|ref|XP_001690683.1| histone H3 [Chlamydomonas reinhardtii] >gi|159465000|ref|XP_001690723.1| histone H3 [Chlamydomonas reinhardtii] >gi|159465195|ref|XP_001690808.1| histone H3 [Chlamydomonas reinhardtii] >gi|159465217|ref|XP_001690819.1| histone H3 [Chlamydomonas reinhardtii] >gi|159465237|ref|XP_00169082…
Unigene21611_Taxus	115	9	36.47	2.68	-3.76641	2.58796e-26	7.29502e-25	-	-	-	gi|195605474|gb|ACG24567.1|/1e-12/syringomycin biosynthesis enzyme [Zea mays]
Unigene25072_Taxus	51	4	16.17	1.19	-3.76429	2.38528e-12	3.05491e-11	-	-	-	gi|224108970|ref|XP_002315035.1|/5e-21/pho1-like protein [Populus trichocarpa] >gi|222864075|gb|EEF01206.1| pho1-like protein [Populus trichocarpa]
Unigene33953_Taxus	51	4	16.17	1.19	-3.76429	2.38528e-12	3.05271e-11	-	-	-	gi|255954875|ref|XP_002568190.1|/4e-22/Pc21g11590 [Penicillium chrysogenum Wisconsin 54-1255] >gi|211589901|emb|CAP96056.1| Pc21g11590 [Penicillium chrysogenum Wisconsin 54-1255]
Unigene34754_Taxus	38	3	12.05	0.89	-3.75908	1.78661e-09	1.67695e-08	-	-	-	-
Unigene34200_Taxus	38	3	12.05	0.89	-3.75908	1.78661e-09	1.67606e-08	-	-	-	gi|225690808|gb|ACO06090.1|/1e-117/cellulose synthase [Phyllostachys edulis]
Unigene29506_Taxus	178	14	56.44	4.17	-3.7586	6.40506e-40	2.27757e-38	-	-	-	-
Unigene2912_Taxus	89	7	28.22	2.09	-3.75514	1.25064e-20	2.94712e-19	-	-	-	gi|115471003|ref|NP_001059100.1|/6e-09/Os07g0192600 [Oryza sativa (japonica cultivar-group)] >gi|50510116|dbj|BAD30884.1| AAA-type ATPase-like [Oryza sativa Japonica Group] >gi|113610636|dbj|BAF21014.1| Os07g0192600 [Oryza sativa Japonica Group]
Unigene32284_Taxus	89	7	28.22	2.09	-3.75514	1.25064e-20	2.94323e-19	-	-	-	gi|159472172|ref|XP_001694225.1|/3e-26/ribosomal protein S25, component of cytosolic 80S ribosome and 40S small subunit [Chlamydomonas reinhardtii] >gi|158276888|gb|EDP02658.1| ribosomal protein S25 [Chlamydomonas reinhardtii]
Unigene32112_Taxus	63	5	19.98	1.49	-3.74517	6.29242e-15	1.1132e-13	-	-	-	gi|50844673|gb|AAT84458.1|/8e-11/cytochrome b5 isoform Cb5-A [Vernicia fordii]
Unigene28929_Taxus	302	24	95.77	7.15	-3.74356	1.69608e-66	7.68847e-65	-	-	-	gi|115473311|ref|NP_001060254.1|/4e-34/Os07g0613200 [Oryza sativa (japonica cultivar-group)] >gi|113611790|dbj|BAF22168.1| Os07g0613200 [Oryza sativa Japonica Group]
Unigene23410_Taxus	112	9	35.52	2.68	-3.72833	1.81979e-25	5.00301e-24	-	-	-	-
Unigene2785_Taxus	25	2	7.93	0.6	-3.72429	1.40855e-06	8.80774e-06	-	-	-	gi|68349016|gb|AAY96415.1|/2e-14/16 kDa. phloem protein 2 [Cucurbita maxima x Cucurbita moschata]
Unigene30202_Taxus	25	2	7.93	0.6	-3.72429	1.40855e-06	8.80465e-06	-	-	-	gi|34393287|dbj|BAC83201.1|/5e-18/SCARECROW protein-like protein [Oryza sativa Japonica Group]
Unigene11656_Taxus	25	2	7.93	0.6	-3.72429	1.40855e-06	8.80156e-06	-	-	-	gi|159031783|dbj|BAF91863.1|/1e-169/ethylene receptor [Cucumis melo var. cantalupensis] >gi|159031785|dbj|BAF91864.1| ethylene receptor [Cucumis melo var. cantalupensis]
Unigene16491_Taxus	25	2	7.93	0.6	-3.72429	1.40855e-06	8.79847e-06	-	-	-	-
Unigene726_Taxus	37	3	11.73	0.89	-3.72025	3.4311e-09	3.12022e-08	GO:0031225//anchored to membrane;GO:0016023//cytoplasmic membrane-bounded vesicle	-	-	gi|115448233|ref|NP_001047896.1|/3e-08/Os02g0710700 [Oryza sativa (japonica cultivar-group)] >gi|113537427|dbj|BAF09810.1| Os02g0710700 [Oryza sativa Japonica Group]
Unigene35432_Taxus	123	10	39	2.98	-3.71009	9.6775e-28	2.80333e-26	-	-	-	gi|202953282|emb|CAG89347.2|/3e-43/DEHA2F14366p [Debaryomyces hansenii]
Unigene9332_Taxus	49	4	15.54	1.19	-3.70695	8.77786e-12	1.05804e-10	-	-	-	gi|255673520|dbj|BAH91219.1|/2e-08/Os01g0661650 [Oryza sativa Japonica Group]
Unigene32910_Taxus	61	5	19.34	1.49	-3.6982	2.30992e-14	3.87853e-13	-	-	-	gi|66866460|gb|AAY57876.1|/2e-64/2-alpha-hydroxytaxane 2-O-benzoyltransferase [Taxus wallichiana var. wallichiana] >gi|66866462|gb|AAY57877.1| 2-alpha-hydroxytaxane 2-O-benzoyltransferase [Taxus wallichiana var. wallichiana]
Unigene35942_Taxus	61	5	19.34	1.49	-3.6982	2.30992e-14	3.87488e-13	-	-	-	gi|255950388|ref|XP_002565961.1|/3e-83/Pc22g20610 [Penicillium chrysogenum Wisconsin 54-1255] >gi|211592978|emb|CAP99349.1| Pc22g20610 [Penicillium chrysogenum Wisconsin 54-1255]
Unigene9169_Taxus	73	6	23.15	1.79	-3.69298	6.19116e-17	1.23928e-15	-	-	-	-
Unigene9598_Taxus	36	3	11.42	0.89	-3.68161	6.57754e-09	5.7809e-08	-	-	-	gi|15240200|ref|NP_201511.1|/3e-22/ICU2 (INCURVATA2); DNA-directed DNA polymerase [Arabidopsis thaliana] >gi|75170581|sp|Q9FHA3.1|DPOLA_ARATH RecName: Full=DNA polymerase alpha catalytic subunit >gi|10177597|dbj|BAB10944.1| DNA polymerase alpha 1 [Arabidopsis thaliana]
Unigene29712_Taxus	481	40	152.53	11.92	-3.67764	1.69558e-103	8.80665e-102	-	-	-	-
Unigene27998_Taxus	48	4	15.22	1.19	-3.67693	1.68041e-11	1.97993e-10	-	-	-	-
Unigene20897_Taxus	60	5	19.03	1.49	-3.67489	4.4182e-14	7.2344e-13	-	-	-	gi|224141843|ref|XP_002324271.1|/1e-156/ammonium transporter [Populus trichocarpa] >gi|222865705|gb|EEF02836.1| ammonium transporter [Populus trichocarpa]
Unigene11900_Taxus	60	5	19.03	1.49	-3.67489	4.4182e-14	7.22775e-13	-	-	-	gi|206730709|gb|ACI16630.1|/2e-57/shikimate O-hydroxycinnamoyltransferase [Trifolium pratense]
Unigene36291_Taxus	72	6	22.83	1.79	-3.6729	1.18349e-16	2.32714e-15	-	-	-	gi|1743354|emb|CAA71003.1|/1e-173/aldehyde dehydrogenase (NAD+) [Nicotiana tabacum]
Unigene27075_Taxus	84	7	26.64	2.09	-3.67202	3.21184e-19	7.16132e-18	-	-	-	gi|33321025|gb|AAQ06271.1|/2e-20/granule-bound starch synthase precursor [Pennisetum glaucum]
Unigene31998_Taxus	24	2	7.61	0.6	-3.66486	2.70726e-06	1.60339e-05	-	-	-	gi|148613345|gb|ABQ96188.1|/6e-21/cyochrome P450 monooxygenase CYP701A16 [Glycine max]
Unigene33883_Taxus	24	2	7.61	0.6	-3.66486	2.70726e-06	1.60285e-05	-	-	-	gi|47026908|gb|AAT08676.1|/1e-12/selenium-binding protein [Hyacinthus orientalis]
Unigene26436_Taxus	95	8	30.13	2.38	-3.66217	1.67986e-21	4.07167e-20	-	-	-	-
Unigene13499_Taxus	35	3	11.1	0.89	-3.64061	1.25858e-08	1.07229e-07	-	-	-	gi|38567720|emb|CAE76009.1|/4e-37/B1358B12.18 [Oryza sativa (japonica cultivar-group)] >gi|90265197|emb|CAH67636.1| B0812A04.6 [Oryza sativa (indica cultivar-group)]
Unigene5510_Taxus	93	8	29.49	2.38	-3.63119	6.10556e-21	1.45415e-19	-	-	-	gi|28380211|sp|Q9M6F0.1|T5AT_TAXCU/2e-09/RecName: Full=Taxadien-5-alpha-ol O-acetyltransferase; AltName: Full=Taxa-4(20), 11(12)-dien-5alpha-ol-O-acetyltransferase; Short=Taxadienol acetyltransferase >gi|6978038|gb|AAF34254.1|AF190130_1 taxadienol acetyl transferase [Taxus cuspidata]
Unigene15138_Taxus	81	7	25.69	2.09	-3.61963	2.2289e-18	4.77832e-17	-	-	-	-
Unigene5980_Taxus	23	2	7.29	0.6	-3.60288	5.1897e-06	2.93134e-05	-	-	-	gi|10177638|dbj|BAB10911.1|/1e-138/receptor protein kinase [Arabidopsis thaliana] >gi|224589711|gb|ACN59387.1| leucine-rich repeat receptor-like protein kinase [Arabidopsis thaliana]
Unigene13622_Taxus	23	2	7.29	0.6	-3.60288	5.1897e-06	2.93041e-05	-	-	-	-
Unigene16950_Taxus	23	2	7.29	0.6	-3.60288	5.1897e-06	2.92948e-05	-	-	-	gi|115483971|ref|NP_001065647.1|/3e-12/Os11g0129800 [Oryza sativa (japonica cultivar-group)] >gi|113644351|dbj|BAF27492.1| Os11g0129800 [Oryza sativa Japonica Group]
Unigene8569_Taxus	23	2	7.29	0.6	-3.60288	5.1897e-06	2.92856e-05	-	-	-	gi|166908371|gb|ABZ02323.1|/2e-52/HAT4 [Arabidopsis halleri]
Unigene8567_Taxus	34	3	10.78	0.89	-3.59841	2.4035e-08	1.97502e-07	-	-	-	gi|115461729|ref|NP_001054464.1|/1e-07/Os05g0115100 [Oryza sativa (japonica cultivar-group)] >gi|55168327|gb|AAV44192.1| unknow protein [Oryza sativa Japonica Group] >gi|113578015|dbj|BAF16378.1| Os05g0115100 [Oryza sativa Japonica Group]
Unigene26368_Taxus	34	3	10.78	0.89	-3.59841	2.4035e-08	1.97411e-07	-	-	-	-
Unigene8990_Taxus	34	3	10.78	0.89	-3.59841	2.4035e-08	1.9732e-07	-	-	-	-
Unigene21459_Taxus	1364	121	432.53	36.05	-3.58473	3.67622e-284	2.24287e-282	-	-	-	gi|8671350|emb|CAB95025.1|/1e-122/pectin methylesterase [Nicotiana tabacum]
Unigene6857_Taxus	78	7	24.73	2.09	-3.56469	1.53397e-17	3.17027e-16	-	-	-	gi|18415301|ref|NP_568174.1|/9e-97/protein phosphatase 2C family protein / PP2C family protein [Arabidopsis thaliana] >gi|186520755|ref|NP_001119181.1| protein phosphatase 2C family protein / PP2C family protein [Arabidopsis thaliana] >gi|75238831|sp|Q84JD5.1|P2C68_ARATH RecName: Full=Probable protein phosphatase 2C 68; Short=AtPP2C68
Unigene1658_Taxus	33	3	10.46	0.89	-3.55493	4.58046e-08	3.64615e-07	-	-	-	-
Unigene12527_Taxus	33	3	10.46	0.89	-3.55493	4.58046e-08	3.64452e-07	-	-	-	-
Unigene27202_Taxus	55	5	17.44	1.49	-3.54902	1.11038e-12	1.48397e-11	-	-	-	gi|75262337|sp|Q9FEL8.1|LAX1_MEDTR/4e-44/RecName: Full=Auxin transporter-like protein 1; AltName: Full=AUX1-like protein 1; AltName: Full=MtLAX1 >gi|28624758|gb|AAM55302.1| auxin influx carrier protein [Medicago truncatula]
Unigene29815_Taxus	22	2	6.98	0.6	-3.54019	9.92018e-06	5.32474e-05	-	-	-	gi|26454611|sp|P93214.2|14339_SOLLC/5e-46/RecName: Full=14-3-3 protein 9 >gi|22138738|emb|CAA67373.2| 14-3-3 protein [Solanum lycopersicum]
Unigene30876_Taxus	22	2	6.98	0.6	-3.54019	9.92018e-06	5.32313e-05	-	-	-	gi|242216056|ref|XP_002473838.1|/4e-13/calmodulin [Postia placenta Mad-698-R] >gi|220727017|gb|EED80949.1| calmodulin [Postia placenta Mad-698-R]
Unigene30189_Taxus	22	2	6.98	0.6	-3.54019	9.92018e-06	5.32153e-05	-	-	-	gi|116782069|gb|ABK22356.1|/1e-13/unknown [Picea sitchensis]
Unigene17682_Taxus	22	2	6.98	0.6	-3.54019	9.92018e-06	5.31993e-05	-	-	-	gi|3377813|gb|AAC28186.1|/4e-18/T15F16.1 gene product [Arabidopsis thaliana]
Unigene34551_Taxus	22	2	6.98	0.6	-3.54019	9.92018e-06	5.31833e-05	-	-	-	gi|9502432|gb|AAF88131.1|AC021043_24/8e-13/Hypothetical protein [Arabidopsis thaliana]
Unigene8979_Taxus	22	2	6.98	0.6	-3.54019	9.92018e-06	5.31673e-05	-	-	-	-
Unigene17747_Taxus	22	2	6.98	0.6	-3.54019	9.92018e-06	5.31513e-05	-	-	-	gi|115334813|gb|ABI94022.1|/4e-28/(iso)flavonoid glycosyltransferase [Medicago truncatula]
Unigene24472_Taxus	22	2	6.98	0.6	-3.54019	9.92018e-06	5.31353e-05	GO:0005750//mitochondrial respiratory chain complex III	GO:0008121//ubiquinol-cytochrome-c reductase activity;GO:0045153//electron transporter, transferring electrons within CoQH2-cytochrome c reductase complex activity	GO:0006122//mitochondrial electron transport, ubiquinol to cytochrome c	gi|159479572|ref|XP_001697864.1|/1e-07/ubiquinol:cytochrome c oxidoreductase 8 kDa subunit [Chlamydomonas reinhardtii] >gi|158273962|gb|EDO99747.1| ubiquinol:cytochrome c oxidoreductase 8 kDa subunit [Chlamydomonas reinhardtii]
Unigene2786_Taxus	22	2	6.98	0.6	-3.54019	9.92018e-06	5.31193e-05	-	-	-	gi|6759442|emb|CAB69847.1|/5e-16/laccase-like protein [Arabidopsis thaliana]
Unigene21402_Taxus	22	2	6.98	0.6	-3.54019	9.92018e-06	5.31034e-05	-	-	-	gi|577503|gb|AAB02554.1|/1e-104/cationic peroxidase [Stylosanthes humilis]
Unigene22281_Taxus	65	6	20.61	1.79	-3.52531	1.07183e-14	1.84133e-13	-	-	-	gi|8052534|gb|AAF71798.1|AC013430_7/6e-06/F3F9.11 [Arabidopsis thaliana]
Unigene23194_Taxus	43	4	13.64	1.19	-3.51881	4.22282e-10	4.29147e-09	-	-	-	gi|28372814|gb|AAO39889.1|/1e-07/At5g09570 [Arabidopsis thaliana]
Unigene20753_Taxus	1268	118	402.09	35.16	-3.51551	6.23422e-260	3.76483e-258	-	-	-	-
Unigene32341_Taxus	150	14	47.57	4.17	-3.51193	4.33744e-32	1.37985e-30	-	-	-	gi|15222068|ref|NP_175346.1|/1e-09/zinc finger (C3HC4-type RING finger) family protein [Arabidopsis thaliana] >gi|68565250|sp|Q94BY6.1|ATL1I_ARATH RecName: Full=RING-H2 finger protein ATL1I >gi|14517432|gb|AAK62606.1| At1g49200/F27J15_35 [Arabidopsis thaliana] >gi|20147327|gb|AAM10377.1| At1g49200/F27J15_35 [Arabidopsis thaliana]
Unigene34582_Taxus	32	3	10.15	0.89	-3.51153	8.71014e-08	6.68265e-07	-	-	-	gi|6851030|emb|CAB71032.1|/9e-65/cysteine protease [Lolium multiflorum]
Unigene35163_Taxus	32	3	10.15	0.89	-3.51153	8.71014e-08	6.67977e-07	-	-	-	gi|18418433|ref|NP_567965.1|/1e-133/HDR (4-HYDROXY-3-METHYLBUT-2-ENYL DIPHOSPHATE REDUCTASE); 4-hydroxy-3-methylbut-2-en-1-yl diphosphate reductase/ 4-hydroxy-3-methylbut-2-en-1-yl diphosphate synthase [Arabidopsis thaliana] >gi|27368105|gb|AAN87171.1| ISPH [Arabidopsis thaliana]
Unigene33986_Taxus	32	3	10.15	0.89	-3.51153	8.71014e-08	6.6769e-07	-	-	-	gi|107738137|gb|ABF83646.1|/6e-49/At1g78815 [Arabidopsis thaliana]
Unigene7568_Taxus	950	89	301.25	26.52	-3.50581	9.69184e-195	5.58771e-193	-	-	-	gi|283135842|gb|ADB11312.1|/1e-23/tau class glutathione transferase GSTU3 [Populus trichocarpa]
Unigene5074_Taxus	53	5	16.81	1.49	-3.49594	3.99468e-12	5.02225e-11	-	-	-	-
Unigene31465_Taxus	53	5	16.81	1.49	-3.49594	3.99468e-12	5.0187e-11	-	-	-	-
Unigene4073_Taxus	445	42	141.11	12.51	-3.49567	6.90358e-92	3.52399e-90	-	-	-	-
Unigene17120_Taxus	42	4	13.32	1.19	-3.48456	8.00678e-10	7.89816e-09	-	-	-	-
Unigene36428_Taxus	21	2	6.66	0.6	-3.47249	1.89044e-05	9.6527e-05	-	-	-	gi|226279853|gb|EEH35419.1|/1e-165/coatomer subunit beta-1 [Paracoccidioides brasiliensis Pb01]
Unigene34884_Taxus	21	2	6.66	0.6	-3.47249	1.89044e-05	9.64993e-05	-	-	-	gi|119501334|ref|XP_001267424.1|/6e-49/phosphoethanolamine [Neosartorya fischeri NRRL 181] >gi|119415589|gb|EAW25527.1| phosphoethanolamine [Neosartorya fischeri NRRL 181]
Unigene8396_Taxus	21	2	6.66	0.6	-3.47249	1.89044e-05	9.64717e-05	-	-	-	gi|18410265|ref|NP_565056.1|/1e-113/SUVH3 (SU(VAR)3-9 HOMOLOG 3); histone methyltransferase [Arabidopsis thaliana] >gi|30580525|sp|Q9C5P4.2|SUVH3_ARATH RecName: Full=Histone-lysine N-methyltransferase, H3 lysine-9 specific SUVH3; AltName: Full=Histone H3-K9 methyltransferase 3; Short=H3-K9-HMTase 3; AltName: Full=Suppressor of variegation 3-9 homolog protein 3; Short=Su(var)3-9 homolog protein 3;…
Unigene1831_Taxus	21	2	6.66	0.6	-3.47249	1.89044e-05	9.6444e-05	-	-	-	-
Unigene17873_Taxus	21	2	6.66	0.6	-3.47249	1.89044e-05	9.64164e-05	-	-	-	gi|62241063|dbj|BAD93688.1|/2e-52/glucosyltransferase [Nicotiana tabacum]
Unigene13919_Taxus	21	2	6.66	0.6	-3.47249	1.89044e-05	9.63888e-05	-	-	-	gi|229891665|sp|B4FGS2.1|SKA1_MAIZE/1e-63/RecName: Full=Spindle and kinetochore-associated protein 1 homolog
Unigene33521_Taxus	52	5	16.49	1.49	-3.46821	7.56016e-12	9.19346e-11	GO:0045275//respiratory chain complex III;GO:0005743//mitochondrial inner membrane;GO:0016021//integral to membrane	GO:0008121//ubiquinol-cytochrome-c reductase activity;GO:0009055//electron carrier activity;GO:0005506//iron ion binding;GO:0051537//2 iron, 2 sulfur cluster binding	GO:0006810//transport;GO:0022900//electron transport chain	gi|159463104|ref|XP_001689782.1|/2e-69/rieske iron-sulfur protein of mitochondrial ubiquinol-cytochrome c reductase [Chlamydomonas reinhardtii] >gi|27525857|emb|CAC86460.2| ubiquinol-cytochrome c reductase [Chlamydomonas reinhardtii] >gi|158283770|gb|EDP09520.1| rieske iron-sulfur protein of mitochondrial ubiquinol-cytochrome c reductase [Chlamydomonas reinhardtii]
Unigene16998_Taxus	156	15	49.47	4.47	-3.46821	5.59194e-33	1.81458e-31	-	-	-	gi|115446887|ref|NP_001047223.1|/8e-95/Os02g0578100 [Oryza sativa (japonica cultivar-group)]
Unigene4157_Taxus	31	3	9.83	0.89	-3.46531	1.65249e-07	1.21449e-06	-	-	-	-
Unigene36331_Taxus	31	3	9.83	0.89	-3.46531	1.65249e-07	1.21399e-06	-	-	-	gi|281333045|gb|ADA60977.1|/2e-37/short internode related sequence 7 [Brassica rapa subsp. pekinensis]
Unigene2877_Taxus	31	3	9.83	0.89	-3.46531	1.65249e-07	1.21348e-06	-	-	-	gi|2462763|gb|AAB71982.1|/4e-25/Highly similar to auxin-induced protein (aldo/keto reductase family) [Arabidopsis thaliana]
Unigene23087_Taxus	257	25	81.5	7.45	-3.45149	3.66422e-53	1.49378e-51	-	-	-	gi|30690070|ref|NP_182082.2|/3e-14/CYP76C3; electron carrier/ heme binding / iron ion binding / monooxygenase/ oxygen binding [Arabidopsis thaliana] >gi|47117814|sp|O64638.2|C76C3_ARATH RecName: Full=Cytochrome P450 76C3
Unigene36145_Taxus	82	8	26	2.38	-3.44948	6.9424e-18	1.4602e-16	-	-	-	gi|110740527|dbj|BAE98369.1|/1e-167/ATP sulfurylase precursor [Arabidopsis thaliana]
Unigene19383_Taxus	41	4	13	1.19	-3.44948	1.51535e-09	1.43825e-08	-	-	-	gi|110739601|dbj|BAF01709.1|/1e-88/receptor-kinase isolog [Arabidopsis thaliana] >gi|110739682|dbj|BAF01748.1| receptor-kinase isolog [Arabidopsis thaliana] >gi|110739766|dbj|BAF01790.1| receptor-kinase isolog [Arabidopsis thaliana]
Unigene6767_Taxus	153	15	48.52	4.47	-3.44023	3.74216e-32	1.1926e-30	-	-	-	gi|87240893|gb|ABD32751.1|/1e-18/SPX, N-terminal; EXS, C-terminal [Medicago truncatula]
Unigene7920_Taxus	30	3	9.51	0.89	-3.41757	3.12748e-07	2.19096e-06	-	-	-	-
Unigene19665_Taxus	80	8	25.37	2.38	-3.41409	2.46438e-17	5.02897e-16	-	-	-	gi|115449609|ref|NP_001048508.1|/0.0/Os02g0816000 [Oryza sativa (japonica cultivar-group)] >gi|113538039|dbj|BAF10422.1| Os02g0816000 [Oryza sativa Japonica Group]
Unigene26256_Taxus	90	9	28.54	2.68	-3.41268	2.4356e-19	5.48549e-18	GO:0005622//intracellular	GO:0003779//actin binding	-	gi|106879609|emb|CAJ38388.1|/1e-32/actin-depolymerizing factor [Plantago major]
Unigene29977_Taxus	50	5	15.86	1.49	-3.41201	2.69532e-11	3.12611e-10	GO:0005829//cytosol	GO:0005524//ATP binding;GO:0004828//serine-tRNA ligase activity	GO:0006434//seryl-tRNA aminoacylation	gi|190344834|gb|EDK36592.2|/2e-37/seryl-tRNA synthetase [Pichia guilliermondii ATCC 6260]
Unigene12166_Taxus	20	2	6.34	0.6	-3.40145	3.59058e-05	0.000175154	-	-	-	-
Unigene27392_Taxus	20	2	6.34	0.6	-3.40145	3.59058e-05	0.000175106	-	-	-	gi|15237256|ref|NP_197713.1|/2e-06/NIC3 (NICOTINAMIDASE 3); catalytic/ nicotinamidase [Arabidopsis thaliana]
Unigene11737_Taxus	20	2	6.34	0.6	-3.40145	3.59058e-05	0.000175058	-	GO:0003824//catalytic activity	GO:0008152//metabolic process	gi|255950514|ref|XP_002566024.1|/5e-28/Pc22g21270 [Penicillium chrysogenum Wisconsin 54-1255] >gi|211593041|emb|CAP99415.1| Pc22g21270 [Penicillium chrysogenum Wisconsin 54-1255]
Unigene13384_Taxus	20	2	6.34	0.6	-3.40145	3.59058e-05	0.00017501	-	-	-	-
Unigene23760_Taxus	20	2	6.34	0.6	-3.40145	3.59058e-05	0.000174962	-	-	-	gi|34921349|sp|Q9ZTS2.1|FER_CAPAN/4e-14/RecName: Full=Ferredoxin, chloroplastic; AltName: Full=PFLP; Flags: Precursor >gi|4104816|gb|AAD02175.1| ferredoxin-like protein [Capsicum annuum]
Unigene26880_Taxus	20	2	6.34	0.6	-3.40145	3.59058e-05	0.000174914	-	-	-	gi|15230454|ref|NP_190045.1|/4e-18/60S acidic ribosomal protein P2 (RPP2D) [Arabidopsis thaliana] >gi|42572577|ref|NP_974384.1| 60S acidic ribosomal protein P2 (RPP2D) [Arabidopsis thaliana] >gi|75264340|sp|Q9LXM8.1|RLA24_ARATH RecName: Full=60S acidic ribosomal protein P2-4 >gi|7635481|emb|CAB88541.1| acidic ribosomal protein P2-like [Arabidopsis thaliana] >gi|28466811|gb|AAO44014.1| At3g44590 […
Unigene32961_Taxus	20	2	6.34	0.6	-3.40145	3.59058e-05	0.000174867	-	-	-	gi|34105772|gb|AAQ62077.1|/1e-82/ribosomal protein L3 [Triticum aestivum]
Unigene10793_Taxus	20	2	6.34	0.6	-3.40145	3.59058e-05	0.000174819	GO:0005737//cytoplasm	GO:0003743//translation initiation factor activity	GO:0035019//somatic stem cell maintenance;GO:0048366//leaf development	gi|115450040|ref|NP_001048621.1|/0.0/Os02g0831600 [Oryza sativa (japonica cultivar-group)] >gi|75126101|sp|Q6K972.1|AGO1C_ORYSJ RecName: Full=Protein argonaute 1C; Short=OsAGO1c; AltName: Full=Protein argonaute 1; Short=OsAGO1 >gi|48716397|dbj|BAD23006.1| AGO1 homologous protein [Oryza sativa Japonica Group] >gi|113538152|dbj|BAF10535.1| Os02g0831600 [Oryza sativa Japonica Group]
Unigene28466_Taxus	20	2	6.34	0.6	-3.40145	3.59058e-05	0.000174771	-	-	-	gi|15228732|ref|NP_191792.1|/5e-13/zinc knuckle (CCHC-type) family protein [Arabidopsis thaliana] >gi|145651784|gb|ABP88117.1| At3g62330 [Arabidopsis thaliana]
Unigene27325_Taxus	20	2	6.34	0.6	-3.40145	3.59058e-05	0.000174723	-	-	-	gi|116782884|gb|ABK22705.1|/5e-06/unknown [Picea sitchensis]
Unigene34027_Taxus	20	2	6.34	0.6	-3.40145	3.59058e-05	0.000174676	-	-	-	gi|30038515|dbj|BAC75713.1|/5e-56/glyceraldehyde-3-phosphate dehydrogenase [Coprinopsis cinerea]
Unigene11406_Taxus	20	2	6.34	0.6	-3.40145	3.59058e-05	0.000174628	-	-	-	gi|15228649|ref|NP_191756.1|/5e-45/NGA2 (NGATHA2); transcription factor [Arabidopsis thaliana] >gi|75182616|sp|Q9M268.1|NGA2_ARATH RecName: Full=B3 domain-containing transcription factor NGA2; AltName: Full=Protein NGATHA 2 >gi|6899895|emb|CAB71904.1| RAV-like protein [Arabidopsis thaliana] >gi|108385265|gb|ABF85768.1| At3g61970 [Arabidopsis thaliana] >gi|227060687|gb|ACP18972.1| NGATHA2 [Arabido…
Unigene3683_Taxus	119	12	37.74	3.58	-3.39806	4.55942e-25	1.2458e-23	-	-	-	-
Unigene18034_Taxus	108	11	34.25	3.28	-3.38434	8.54112e-23	2.17994e-21	-	-	-	gi|14326547|gb|AAK60318.1|AF385727_1/2e-50/AT3g03980/T11I18_9 [Arabidopsis thaliana] >gi|23505923|gb|AAN28821.1| At3g03980/T11I18_9 [Arabidopsis thaliana]
Unigene19899_Taxus	39	4	12.37	1.19	-3.37781	5.39606e-09	4.79695e-08	-	-	-	-
Unigene6769_Taxus	175	18	55.49	5.36	-3.37192	6.07858e-36	2.04321e-34	-	-	-	gi|5080780|gb|AAD39290.1|AC007576_13/1e-162/Hypothetical protein [Arabidopsis thaliana]
Unigene30781_Taxus	29	3	9.2	0.89	-3.36976	5.90372e-07	3.9584e-06	-	-	-	gi|15238567|ref|NP_197841.1|/5e-09/DMR6 (DOWNY MILDEW RESISTANT 6); oxidoreductase/ oxidoreductase, acting on paired donors, with incorporation or reduction of molecular oxygen, 2-oxoglutarate as one donor, and incorporation of one atom each of oxygen into both donors [Arabidopsis thaliana] >gi|14423476|gb|AAK62420.1|AF386975_1 flavanone 3-hydroxylase-like protein [Arabidopsis thaliana] >gi|10177…
Unigene31427_Taxus	29	3	9.2	0.89	-3.36976	5.90372e-07	3.95691e-06	-	-	-	gi|226507148|ref|NP_001150944.1|/3e-19/NAD-dependent epimerase/dehydratase family protein [Zea mays] >gi|195643142|gb|ACG41039.1| NAD-dependent epimerase/dehydratase family protein [Zea mays]
Unigene22656_Taxus	29	3	9.2	0.89	-3.36976	5.90372e-07	3.95543e-06	-	-	-	-
Unigene15709_Taxus	87	9	27.59	2.68	-3.36384	1.61521e-18	3.47524e-17	-	-	-	-
Unigene36344_Taxus	87	9	27.59	2.68	-3.36384	1.61521e-18	3.47105e-17	-	-	-	gi|255678900|dbj|BAH94567.1|/9e-11/Os09g0416600 [Oryza sativa Japonica Group]
Unigene8530_Taxus	58	6	18.39	1.79	-3.36089	9.14822e-13	1.23936e-11	-	-	-	gi|58259413|ref|XP_567119.1|/1e-34/DNA-directed RNA polymerases ii 24 kda polypeptide [Cryptococcus neoformans var. neoformans JEC21]
Unigene2546_Taxus	135	14	42.81	4.17	-3.35983	5.73588e-28	1.67242e-26	-	-	-	gi|18411783|ref|NP_565167.1|/3e-09/senescence-associated protein-related [Arabidopsis thaliana] >gi|6573767|gb|AAF17687.1|AC009243_14 F28K19.24 [Arabidopsis thaliana]
Unigene14570_Taxus	48	5	15.22	1.49	-3.35258	9.54612e-11	1.03951e-09	-	-	-	gi|108706615|gb|ABF94410.1|/6e-08/expressed protein [Oryza sativa (japonica cultivar-group)]
Unigene27483_Taxus	249	26	78.96	7.75	-3.34885	3.14858e-50	1.25767e-48	-	-	-	-
Unigene23103_Taxus	525	55	166.48	16.39	-3.34446	5.28632e-104	2.76175e-102	-	-	-	-
Unigene14822_Taxus	38	4	12.05	1.19	-3.34	1.0151e-08	8.7489e-08	-	-	-	gi|209954695|dbj|BAG80538.1|/2e-17/UDP-glucose:glucosyltransferase [Lycium barbarum]
Unigene23718_Taxus	416	44	131.92	13.11	-3.33092	1.89768e-82	9.44336e-81	-	GO:0008661//1-deoxy-D-xylulose-5-phosphate synthase activity	GO:0016114//terpenoid biosynthetic process	gi|193792541|gb|ACF21004.1|/3e-13/1-deoxy-D-xylulose 5-phosphate synthase [Salvia miltiorrhiza]
Unigene29641_Taxus	19	2	6.03	0.6	-3.32912	6.79508e-05	0.000309998	-	GO:0008234//cysteine-type peptidase activity	-	gi|595986|gb|AAA79915.1|/4e-23/cysteine proteinase [Dianthus caryophyllus]
Unigene32098_Taxus	19	2	6.03	0.6	-3.32912	6.79508e-05	0.000309919	-	-	-	gi|30694320|ref|NP_849784.1|/2e-80/AGO1 (ARGONAUTE 1); endoribonuclease/ miRNA binding / protein binding / siRNA binding [Arabidopsis thaliana]
Unigene8800_Taxus	19	2	6.03	0.6	-3.32912	6.79508e-05	0.00030984	-	-	-	-
Unigene35907_Taxus	19	2	6.03	0.6	-3.32912	6.79508e-05	0.00030976	-	-	-	gi|255676229|dbj|BAH93067.1|/8e-21/Os05g0312300 [Oryza sativa Japonica Group]
Unigene1137_Taxus	19	2	6.03	0.6	-3.32912	6.79508e-05	0.000309681	GO:0009536//plastid;GO:0005739//mitochondrion	GO:0005488//binding;GO:0005215//transporter activity	GO:0006839//mitochondrial transport	gi|115444901|ref|NP_001046230.1|/4e-20/Os02g0202400 [Oryza sativa (japonica cultivar-group)] >gi|113535761|dbj|BAF08144.1| Os02g0202400 [Oryza sativa Japonica Group]
Unigene35030_Taxus	19	2	6.03	0.6	-3.32912	6.79508e-05	0.000309602	-	-	-	gi|51702161|sp|Q9UUF2.1|SYMC_SCHPO/1e-51/RecName: Full=Probable methionyl-tRNA synthetase, cytoplasmic; AltName: Full=Methionine--tRNA ligase; Short=MetRS
Unigene28391_Taxus	19	2	6.03	0.6	-3.32912	6.79508e-05	0.000309523	-	-	-	gi|7671232|gb|AAF66435.1|AF249916_1/1e-40/ADP-glucose pyrophosphorylase [Perilla frutescens]
Unigene11878_Taxus	19	2	6.03	0.6	-3.32912	6.79508e-05	0.000309444	-	GO:0046872//metal ion binding	-	gi|116013490|dbj|BAF34567.1|/4e-35/flavonoid 3',5'-hydroxylase [Petunia guarapuavensis]
[truncated: 1,586 more rows]
